# Supplementary material
Source: Research Square preprint supplement (doi:10.21203/rs.3.rs-9085811/v1)
Supplement: Supplementary file 1 [file 68668d4cad516b0c6337a658.xlsx]

## Sheet: H358 KRASsh vs GFPsh
gene_name	shKRASvsC.logFC	shKRASvsC.P.Value	shKRASvsC.adj.P.Val	shKRASvsC.B
CYP26B1	-1.41753	3.37373e-05	0.000164017	2.4447
AK2	-1.12436	6.51423e-10	2.12752e-08	12.8295
REXO5	-1.86647	5.15985e-05	0.00023766	2.14647
ETV1	-4.0096	5.98852e-10	1.99236e-08	12.9695
DBF4	-1.89081	6.01433e-09	1.25977e-07	10.8415
E2F2	-2.39818	9.41706e-07	7.90817e-06	5.99589
ETV7	-1.82072	1.44108e-08	2.55794e-07	10.0144
NCAPD2	-1.26854	5.56213e-10	1.88191e-08	13.135
ANLN	-1.33049	9.4445e-05	0.000397716	1.30972
BRCA1	-2.92372	5.01965e-12	5.32226e-10	17.8996
CD22	-1.71952	4.48997e-05	0.000210119	2.26968
TACC3	-2.45261	1.38034e-12	2.08363e-10	19.2547
POLA2	-1.69327	8.81637e-11	4.46069e-09	15.1038
CCDC88C	-1.2249	2.27632e-08	3.67937e-07	9.43674
IL20RA	-1.9365	0.000227292	0.000839363	0.711386
DEPDC1	-3.88272	1.28209e-09	3.61994e-08	12.1642
FAS	-1.06091	8.5178e-06	5.08258e-05	3.4044
CD44	-1.18941	2.24105e-08	3.63848e-07	9.25619
DEPDC1B	-2.78304	3.33244e-08	5.04284e-07	9.25044
SPDL1	-1.70087	4.39507e-08	6.30605e-07	8.86911
BARX2	-1.64308	5.15795e-05	0.00023766	1.99196
SCML1	-1.77915	1.22348e-08	2.24366e-07	10.1827
CELF2	-1.98743	1.44814e-08	2.56799e-07	10.0667
RAD51	-3.16651	7.62865e-11	3.9753e-09	15.2411
POLQ	-3.5866	4.32906e-07	4.1161e-06	6.54226
NOP58	-1.62721	1.62962e-09	4.42273e-08	11.9194
IL17RB	-2.40399	6.85386e-08	9.10442e-07	8.52956
DCBLD2	-1.48333	5.36917e-09	1.14565e-07	10.822
NDC1	-1.01252	0.000234263	0.000860237	0.0978225
MCM10	-2.62831	1.45987e-08	2.58127e-07	10.0733
MTHFD2	-1.97774	1.67821e-11	1.25625e-09	16.6644
NGEF	-1.49647	1.14132e-08	2.12284e-07	10.1646
ASPM	-2.4688	9.13699e-07	7.72268e-06	5.89596
STAG3	-1.9107	1.80272e-09	4.78586e-08	12.1309
PRR11	-2.44729	4.57306e-13	9.93455e-11	20.3554
RNF126	-1.348	7.52313e-10	2.39808e-08	12.746
TCOF1	-1.23992	8.89113e-10	2.73395e-08	12.5442
ATP2B1	-1.86543	1.64696e-08	2.84058e-07	9.69612
TRIP13	-1.28492	1.65291e-07	1.87985e-06	7.24401
SMC1A	-1.11286	1.29267e-08	2.35166e-07	9.8024
HMMR	-3.66851	1.23449e-09	3.52864e-08	12.2251
PVR	-1.05828	1.92635e-08	3.20736e-07	9.41064
TP63	-1.1409	8.47709e-05	0.000362446	1.25006
DHRS9	-3.78627	0.00036827	0.00126247	0.18235
TIPIN	-1.47395	2.06204e-05	0.000107578	2.76751
GTSE1	-2.26796	8.24648e-09	1.63187e-07	10.635
MOCOS	-2.68297	1.43425e-09	3.96919e-08	12.3607
WDR62	-2.03054	9.07343e-06	5.35118e-05	3.8013
MCM6	-1.72866	8.39425e-10	2.62536e-08	12.753
SPAG5	-2.28433	1.92746e-10	8.07457e-09	14.3471
PAG1	-1.19124	1.09587e-07	1.32908e-06	7.80001
UBE2T	-1.45983	8.90087e-08	1.11735e-06	7.8858
IL4R	-1.12076	8.80677e-07	7.48862e-06	5.70471
POLD3	-1.0407	3.80391e-05	0.000181976	1.77746
SMC1B	-2.46012	1.51905e-10	6.63767e-09	14.5829
SP140	-2.37026	1.39012e-07	1.62551e-06	7.85932
KIF22	-1.55844	4.73669e-11	2.68682e-09	15.6752
PUM3	-1.15034	2.40623e-08	3.8485e-07	9.11791
RBL1	-1.2557	1.91179e-05	0.00010098	2.89401
NDC80	-2.83867	4.01919e-09	8.98537e-08	11.3371
ME2	-1.27113	4.22531e-07	4.03464e-06	6.45694
AKR1B1	-1.64788	6.34755e-10	2.08521e-08	13.0015
ORC1	-1.91633	1.94304e-07	2.13793e-06	7.50222
RAD54L	-2.41531	6.82027e-09	1.39627e-07	10.8172
LAT2	-3.21078	7.18591e-08	9.42027e-07	8.50034
TMPRSS11E	-2.06008	3.39353e-10	1.27014e-08	13.728
AURKA	-2.36906	6.4875e-12	6.20735e-10	17.7082
TPX2	-3.02777	2.81295e-14	1.51113e-11	23.0328
SMOX	-2.31448	8.84529e-11	4.46296e-09	15.116
FUS	-1.21409	2.20021e-10	8.87126e-09	13.9723
FXYD5	-1.16238	2.88079e-09	6.89616e-08	11.286
BIRC5	-3.14176	3.76057e-15	3.4088e-12	24.9567
OTUB2	-1.96188	4.96635e-10	1.72453e-08	13.3974
TFAP4	-1.65311	8.69969e-07	7.41483e-06	5.90682
KIF4A	-3.00145	1.05467e-10	5.10295e-09	14.9411
ITGA6	-2.49149	6.95432e-11	3.68712e-09	15.2825
MAP3K20	-1.36983	1.45976e-08	2.58127e-07	9.76243
ORC6	-2.7199	7.57838e-13	1.35705e-10	19.8493
RGS17	-2.53975	1.17993e-05	6.69091e-05	3.55719
SEMA6A	-1.91771	2.93629e-06	2.08214e-05	4.85595
WDR76	-1.9105	7.439e-08	9.6707e-07	8.47164
CLSPN	-1.40865	3.24271e-06	2.26216e-05	4.47441
CDC45	-2.47507	2.50949e-12	3.2053e-10	18.6509
CDC6	-2.6976	1.21289e-12	1.9211e-10	19.3519
TMEM38B	-1.56182	4.4307e-07	4.19876e-06	6.21157
CDC7	-2.14099	5.85557e-09	1.23075e-07	10.9736
NRP1	-1.33402	9.36242e-08	1.16647e-06	8.08269
PRTFDC1	-1.18521	6.06957e-06	3.82015e-05	3.80217
RANBP1	-1.42053	4.61498e-10	1.6179e-08	13.1968
DERL3	-1.56617	8.63649e-06	5.13662e-05	3.77352
SH3BP1	-1.00027	1.06885e-05	6.14304e-05	3.27034
CENPM	-3.0702	1.18065e-13	4.31293e-11	21.5847
MCM5	-1.47264	5.36043e-08	7.42291e-07	8.54695
DESI1	-1.4564	8.47369e-10	2.63666e-08	12.6317
COCH	-1.61236	1.69316e-05	9.09844e-05	2.96613
POLE2	-2.74532	3.43874e-09	7.90045e-08	11.4851
PYGL	-1.49554	2.72678e-11	1.83105e-09	16.1786
CDKN3	-3.07092	2.97467e-13	7.34221e-11	20.7647
PLEK2	-1.97293	6.58254e-12	6.22954e-10	17.6737
ASB2	-3.44842	2.02533e-06	1.50953e-05	5.20561
CEP128	-1.8244	0.000106586	0.000440151	1.44644
HIF1A	-1.39436	3.7459e-06	2.54819e-05	3.88667
MTHFD1	-1.12197	3.12085e-10	1.18017e-08	13.6449
VRK1	-2.29415	4.48239e-11	2.55847e-09	15.7959
EMC9	-1.32687	2.04515e-09	5.26864e-08	11.7915
MYBL2	-3.41124	3.19131e-13	7.75618e-11	20.5189
SLCO4A1	-3.13987	5.26014e-12	5.42805e-10	17.8661
CDC25B	-2.38775	1.10384e-10	5.231e-09	14.7639
ARFRP1	-1.2385	5.96343e-09	1.25054e-07	10.7173
NOP56	-1.33817	7.41175e-10	2.37631e-08	12.6775
JAG1	-2.39388	1.78624e-12	2.49051e-10	18.9838
E2F1	-2.4507	3.10721e-09	7.37055e-08	11.5985
FAM83D	-2.32509	1.32829e-08	2.39972e-07	10.0833
RBFA	-1.18911	1.1563e-08	2.14633e-07	10.0265
RBBP8	-1.21237	7.48534e-07	6.53849e-06	5.86617
VSIG1	-1.64827	4.8563e-05	0.000225128	1.95734
SMS	-1.46854	3.38553e-08	5.10494e-07	8.81191
SRPX2	-1.21258	4.31804e-09	9.52809e-08	11.0695
SLC25A15	-1.4259	1.10656e-09	3.22864e-08	12.4617
SLC7A5	-1.39689	9.5105e-12	7.96831e-10	17.1863
GABPB1	-1.67425	2.36792e-07	2.50145e-06	7.04598
OIP5	-2.66194	3.84939e-11	2.32043e-09	15.8983
PLAT	-2.24669	7.19403e-11	3.78672e-09	15.193
IL7	-1.86804	6.83177e-06	4.21562e-05	3.95834
PYCR3	-1.19575	4.48099e-08	6.4142e-07	8.59511
ERI1	-1.12235	5.87686e-05	0.000265761	1.44234
SLC39A14	-1.15787	2.33472e-09	5.8416e-08	11.5566
TNFRSF10A	-1.6858	3.20297e-09	7.4969e-08	11.4135
MCM4	-2.00687	5.62818e-13	1.17825e-10	20.1276
ASF1B	-1.85821	1.74712e-08	2.96848e-07	9.88197
CCNE1	-1.90986	2.04065e-05	0.000106584	2.93548
SLC1A5	-2.67003	5.21521e-14	2.32331e-11	22.5155
DNAH11	-1.95062	6.65124e-10	2.16165e-08	13.1026
ADAP1	-2.08687	6.42299e-11	3.46065e-09	15.4277
GRB10	-1.12036	4.04528e-08	5.93172e-07	8.64728
STX1A	-1.19047	2.56748e-08	4.05316e-07	9.26507
EZH2	-1.58738	9.88785e-09	1.87931e-07	10.2046
PLGRKT	-1.31537	1.96322e-10	8.16817e-09	14.1112
UBE2S	-2.11733	1.29485e-09	3.64976e-08	12.4398
PPIF	-1.55263	1.69574e-07	1.91901e-06	7.23634
ABCC3	-1.48553	2.17036e-09	5.50578e-08	11.8083
MMD	-1.24142	6.8346e-05	0.000302115	1.36441
AREG	-4.50383	1.14971e-15	2.09994e-12	26.2284
NEIL3	-3.13249	4.78782e-06	3.13776e-05	4.39198
NSD2	-1.26428	3.88736e-10	1.41722e-08	13.4655
NCAPG	-3.26678	3.36295e-09	7.8115e-08	11.2993
NECTIN1	-1.45063	4.3626e-09	9.57728e-08	11.0899
SYT10	-1.74885	5.63511e-05	0.00025648	2.03465
MAGOHB	-1.58101	2.24312e-08	3.6386e-07	9.48332
FOXM1	-2.79298	2.65527e-12	3.29922e-10	18.5787
RAD51AP1	-1.48218	1.44859e-06	1.13556e-05	5.33489
RFC5	-1.63611	1.05685e-10	5.10295e-09	14.8571
CDCA3	-3.52362	5.5835e-10	1.88191e-08	13.1387
FBXO5	-1.46131	7.50271e-05	0.000326201	1.33393
MCM3	-1.14517	2.80431e-09	6.73957e-08	11.4645
BAG2	-1.11473	3.45415e-06	2.38386e-05	4.00575
ASCC3	-1.25965	5.46637e-07	5.01977e-06	5.96991
VEGFA	-1.71869	2.96267e-08	4.57037e-07	8.82469
SLC29A1	-1.52577	2.55521e-06	1.85644e-05	4.91385
KIF20A	-2.17251	6.43229e-08	8.63866e-07	8.56778
LMNB1	-2.55236	1.03419e-08	1.95948e-07	10.3025
PDE4D	-1.57122	3.67308e-05	0.00017641	2.28964
BRIX1	-1.23452	1.96592e-08	3.25249e-07	9.25752
STC2	-3.33022	2.69968e-14	1.49423e-11	23.1749
SMC4	-1.82144	1.89253e-09	4.96083e-08	11.8861
PFKFB4	-1.084	3.48407e-07	3.44354e-06	6.6675
HES1	-1.43085	3.06825e-11	1.9733e-09	16.0274
GNB4	-1.0982	0.000194372	0.000733212	0.463232
MAPKAPK3	-1.13402	5.44317e-09	1.15739e-07	10.6945
CENPA	-3.37966	3.1616e-12	3.77429e-10	18.3776
PPM1G	-1.10968	6.72394e-07	5.96178e-06	5.59984
LOXL3	-1.30578	9.15344e-05	0.000387546	1.34069
CCDC88A	-1.70664	6.60891e-08	8.84335e-07	8.46494
FHL2	-1.91748	2.33416e-12	3.02365e-10	18.6671
HPCAL1	-1.22545	2.6937e-08	4.22321e-07	9.02058
ODC1	-1.49953	2.88589e-11	1.88301e-09	16.0952
SRSF7	-1.13958	3.75673e-10	1.38144e-08	13.3617
WIPF1	-3.54579	0.000335564	0.00116722	0.374061
PNO1	-1.52786	2.80001e-11	1.85972e-09	16.1381
FARSB	-1.21753	1.973e-08	3.26125e-07	9.40982
ERRFI1	-1.76321	1.44724e-10	6.40045e-09	14.4369
ARHGEF2	-2.11793	6.40418e-12	6.18901e-10	17.7073
SRM	-1.38244	8.18438e-07	7.03803e-06	5.40068
UCHL5	-1.60816	1.38841e-07	1.62456e-06	7.29381
AGMAT	-2.24932	6.16255e-07	5.55572e-06	6.41063
TTF2	-1.03823	2.0608e-07	2.2472e-06	7.0839
AIRIM	-1.18255	6.98432e-07	6.15382e-06	5.71763
CDC20	-2.82126	1.00664e-11	8.2672e-10	17.278
NEK2	-3.66902	8.77892e-12	7.52676e-10	17.1733
CENPF	-2.3627	5.96515e-12	5.95374e-10	17.7929
MUC5B	-3.38451	1.92875e-12	2.64876e-10	18.5831
KIF14	-2.81203	2.93654e-06	2.08214e-05	4.76245
ABCG2	-3.36171	5.43755e-06	3.47748e-05	4.22829
CTNNAL1	-1.52376	2.39095e-10	9.47305e-09	13.9739
PHF19	-2.14296	5.67674e-13	1.17825e-10	20.1344
OGFRL1	-2.58678	4.20245e-13	9.59473e-11	20.4291
HELLS	-1.08355	1.4171e-05	7.81736e-05	2.89381
GOT1	-1.72142	3.55348e-11	2.18533e-09	15.9462
CD274	-2.72785	1.33924e-09	3.75172e-08	12.3964
MTHFD1L	-1.42399	8.89209e-11	4.47421e-09	14.9674
MASTL	-2.01333	3.36183e-09	7.8115e-08	11.4358
EXOSC8	-1.35759	1.06645e-06	8.71143e-06	5.32128
TMPO	-1.99414	2.28022e-07	2.43414e-06	7.00628
DUSP4	-1.75061	4.07721e-12	4.59692e-10	18.1061
NCAPH	-2.55202	1.4668e-11	1.12568e-09	16.9056
KIF18A	-2.31802	0.000200778	0.000754104	0.862349
TMEM156	-2.12119	2.4228e-13	6.50772e-11	20.99
GPSM2	-1.46618	8.62302e-06	5.13027e-05	3.50472
CCDC18	-1.54654	1.08755e-05	6.23091e-05	3.31013
ZWINT	-2.36786	3.35911e-11	2.12267e-09	16.0261
ADGRE5	-1.1923	8.16293e-09	1.62061e-07	10.3172
CENPK	-2.74955	5.74732e-12	5.79972e-10	17.8126
CDK2	-1.15188	1.49024e-05	8.14705e-05	3.02111
TUBA1B	-1.00443	2.38183e-09	5.91893e-08	11.4161
STIL	-1.94517	3.45119e-08	5.17983e-07	9.20805
HJURP	-2.5592	5.55798e-10	1.88191e-08	13.3003
NDUFAF4	-1.2461	1.05601e-07	1.28501e-06	7.79662
G0S2	-2.86623	5.04107e-12	5.32226e-10	17.9676
EXOSC9	-1.06882	2.57375e-07	2.67556e-06	6.70481
TOX2	-3.08513	1.55572e-09	4.26468e-08	12.2725
EEF1E1	-1.52513	1.65731e-07	1.88251e-06	7.10584
EREG	-4.11481	3.58584e-10	1.33057e-08	13.6488
SOX21	-2.58565	2.13942e-06	1.58719e-05	5.1784
HROB	-1.91103	1.28514e-05	7.20473e-05	3.44627
SLC25A19	-1.10498	1.39797e-07	1.63052e-06	7.52375
MIR9-1HG	-1.56728	1.055e-10	5.10295e-09	14.8994
SLC2A4RG	-1.28024	3.93379e-07	3.80968e-06	6.17033
SH2D3A	-1.26539	2.20404e-09	5.57574e-08	11.6494
FOXA2	-2.9714	7.70459e-12	6.81267e-10	17.5294
MCM8	-2.15661	2.41241e-09	5.97056e-08	11.7726
XRCC3	-1.99752	9.72481e-09	1.85605e-07	10.461
BCL2L12	-1.06457	1.27208e-07	1.50288e-06	7.532
SBDS	-1.09473	1.0236e-08	1.94346e-07	9.97077
TRAP1	-1.09773	1.37079e-08	2.46337e-07	9.69181
DLGAP5	-2.47018	2.2599e-08	3.65932e-07	9.64416
AUNIP	-2.0686	1.67153e-07	1.8963e-06	7.66123
PKMYT1	-3.27933	4.94918e-11	2.74762e-09	15.4317
PAICS	-1.15389	1.15615e-08	2.14633e-07	9.81004
CDC42EP1	-1.94566	2.03857e-11	1.43762e-09	16.4941
LIF	-1.42297	1.50955e-08	2.64605e-07	9.75822
RIBC2	-2.16796	4.96856e-06	3.23301e-05	4.35816
STRIP2	-3.34539	2.48474e-07	2.60228e-06	7.09616
KNSTRN	-1.48904	2.10655e-10	8.5693e-09	14.1266
DUT	-1.29993	3.42573e-11	2.13553e-09	15.8693
E2F8	-2.0828	1.02694e-06	8.47206e-06	5.87726
PIMREG	-1.60116	5.93697e-07	5.37891e-06	6.21556
EGLN3	-1.35652	3.40673e-08	5.12975e-07	8.99146
RNASE1	-1.03345	9.5476e-05	0.000401166	1.17337
SGO1	-3.24987	2.29828e-09	5.77822e-08	11.8454
TOMM40	-1.76187	5.77608e-08	7.89671e-07	8.14461
CEP85	-1.13782	2.88418e-07	2.93971e-06	6.84757
ZNF331	-1.48191	9.06757e-09	1.75258e-07	10.428
GINS2	-2.72213	2.24539e-14	1.28163e-11	23.3252
HAUS8	-1.11463	0.000219826	0.000814593	0.352198
PSMC3IP	-1.41171	6.71737e-08	8.95568e-07	8.37008
ANO1	-1.32021	1.90196e-05	0.000100606	2.77641
TOP2A	-2.4155	7.44968e-09	1.49855e-07	10.6138
KHDRBS3	-2.02177	5.84944e-10	1.95199e-08	13.1769
BRME1	-1.45752	0.000181847	0.000692398	0.881231
PPARG	-2.30653	6.75532e-12	6.32748e-10	17.6738
NUP210	-1.65823	3.67017e-10	1.357e-08	13.6243
SCLY	-1.89401	2.36513e-08	3.79939e-07	9.54833
FIGNL1	-1.50502	4.16719e-06	2.79317e-05	4.41975
PCNA	-1.25248	3.69664e-09	8.35531e-08	11.0196
RFC3	-2.64522	1.26426e-09	3.58568e-08	12.3965
MORC4	-1.79808	2.36329e-09	5.88086e-08	11.8131
LRRCC1	-1.06634	1.0049e-05	5.82311e-05	3.2963
EIF2S1	-1.02304	4.50728e-09	9.83579e-08	10.8411
CCNB1	-2.46477	2.06921e-12	2.75869e-10	18.8396
IRAK2	-2.25925	8.95457e-11	4.49327e-09	15.1062
IL15RA	-1.677	6.83104e-11	3.63758e-09	15.3433
DDB2	-1.63543	2.75645e-08	4.3068e-07	9.34902
YARS1	-1.70964	1.34792e-12	2.05165e-10	19.2442
PHC2	-1.1164	2.3613e-09	5.88086e-08	11.5105
CDCA8	-2.74559	2.84263e-11	1.87439e-09	16.2487
RNF138	-1.96277	2.49019e-07	2.6056e-06	7.12287
FHOD3	-1.34985	4.27658e-10	1.51968e-08	13.4164
CLDN10	-2.19462	5.82992e-13	1.19644e-10	20.1154
ETS1	-1.01048	3.68078e-06	2.51137e-05	4.13966
WDR36	-1.01399	5.24941e-06	3.37147e-05	3.89787
C9orf40	-1.76138	4.87096e-11	2.71244e-09	15.6164
PSAT1	-3.13971	2.78207e-15	3.13744e-12	25.4226
NT5E	-2.45186	3.05297e-15	3.13744e-12	25.3199
TROAP	-2.59036	2.22263e-11	1.54359e-09	16.4904
ESPL1	-2.90288	5.32518e-09	1.1376e-07	11.0503
LTV1	-1.32016	2.66391e-07	2.75361e-06	6.79653
RNASEH2B	-1.39135	2.97142e-09	7.08524e-08	11.3323
BORA	-1.66052	1.51041e-07	1.74164e-06	7.69001
SRSF1	-1.71814	4.2344e-06	2.82784e-05	3.89175
BRIP1	-1.36372	2.23062e-05	0.000115026	2.53384
DSCC1	-2.11301	1.03495e-07	1.26868e-06	7.96269
MYC	-2.19091	2.08844e-09	5.34249e-08	11.6772
ARHGEF39	-2.01105	3.83643e-07	3.7372e-06	6.78672
HMGA1	-2.24014	3.91924e-15	3.4088e-12	25.0983
TCF19	-2.10943	1.2671e-09	3.58815e-08	12.4849
FGFBP1	-2.59013	3.40217e-09	7.85431e-08	11.5089
GGH	-1.17873	1.41545e-08	2.52719e-07	9.7173
KIF23	-2.50399	7.53809e-12	6.79764e-10	17.56
KNL1	-2.93301	1.83569e-07	2.05195e-06	7.57055
ADCY3	-1.70665	4.30779e-09	9.52809e-08	11.1412
PNPT1	-1.79705	2.36827e-10	9.40356e-09	14.038
STAMBPL1	-2.96306	2.49405e-07	2.60754e-06	7.27544
KIF11	-2.58433	5.14079e-09	1.10534e-07	11.0765
DUSP5	-2.01253	1.33461e-08	2.40875e-07	10.1397
CEP55	-2.71644	5.27586e-08	7.3336e-07	8.81175
BARD1	-1.02592	5.96574e-05	0.000269182	1.38932
MNS1	-2.9881	9.8224e-10	2.94591e-08	12.6501
GPAT3	-3.05371	4.18363e-11	2.46497e-09	15.8097
PRDM5	-1.75921	0.000349047	0.00120688	0.275163
CENPE	-3.17359	1.41977e-09	3.9456e-08	12.372
RGS3	-2.10492	4.28544e-11	2.47842e-09	15.8247
PHLDA1	-3.20924	6.73403e-15	4.91988e-12	24.5573
DUSP6	-3.8985	4.59599e-13	9.93455e-11	20.265
GAS2L3	-3.23507	7.96515e-09	1.58479e-07	10.6206
FAM222A	-1.73166	0.000100436	0.000418254	1.43018
SLC7A1	-2.49175	1.49486e-13	5.05622e-11	21.47
BRCA2	-2.11412	5.23444e-07	4.82864e-06	6.46947
DIAPH3	-2.13781	2.32324e-09	5.82084e-08	11.8663
PIF1	-2.1889	4.02163e-07	3.87626e-06	6.81551
FANCI	-2.19567	6.40126e-10	2.09909e-08	13.1367
TICRR	-2.11595	3.48881e-06	2.40012e-05	4.70207
MCTP2	-1.04842	0.000240323	0.000880012	0.197033
KATNB1	-1.05209	9.34451e-08	1.16503e-06	7.8034
KIFC3	-1.48027	4.20442e-11	2.46595e-09	15.7418
COPS3	-1.46604	2.06364e-09	5.30133e-08	11.7006
PRELID3A	-1.17086	7.79752e-06	4.71907e-05	3.46241
RNF157	-1.41853	1.0731e-08	2.01855e-07	10.2306
DUS3L	-1.71418	1.70441e-08	2.9149e-07	9.85166
EPHA2	-1.24309	6.03849e-09	1.26193e-07	10.5262
PLK4	-1.90338	2.0313e-05	0.000106187	2.9582
KIF2C	-3.29598	9.85916e-12	8.18534e-10	17.2768
UCK2	-1.17612	3.40335e-10	1.27121e-08	13.5915
NUF2	-2.92114	9.42269e-11	4.68952e-09	15.0576
PFDN2	-1.40035	7.63936e-11	3.9753e-09	15.0526
ANP32E	-1.54918	1.56029e-10	6.80161e-09	14.4111
DTL	-2.91922	5.44965e-09	1.15742e-07	11.0192
TTC13	-1.32607	0.000160583	0.000622982	0.857066
PYCR2	-1.32608	7.42573e-11	3.88627e-09	15.1166
LBR	-1.04812	0.000175793	0.000673982	0.492245
CHAC2	-1.87315	1.70803e-11	1.27056e-09	16.7112
CDCA7	-2.82708	9.94158e-11	4.89442e-09	15.0057
FANCD2	-2.20887	2.95469e-08	4.56192e-07	9.37964
STAC	-1.93136	1.23838e-09	3.53005e-08	12.4777
COL8A1	-1.93904	6.32217e-11	3.42654e-09	15.4189
LYAR	-1.48829	1.35708e-10	6.12026e-09	14.4564
ENOPH1	-1.50444	1.19199e-09	3.42927e-08	12.2569
AFG2A	-1.1865	1.81412e-06	1.37375e-05	4.99299
CCNA2	-3.01356	4.50119e-08	6.43808e-07	8.82087
NAF1	-1.62943	1.91066e-10	8.04106e-09	14.3015
NKD2	-2.77569	1.21987e-09	3.49778e-08	12.4946
MYO10	-1.1181	1.79864e-07	2.0167e-06	7.08292
TNFAIP8	-1.86737	7.47361e-09	1.50171e-07	10.6712
TRIM7	-2.19017	1.05464e-08	1.98792e-07	10.3811
MMS22L	-1.18667	7.16369e-05	0.000314354	1.55643
MTFR2	-2.92003	8.23752e-06	4.94441e-05	3.89287
CDCA5	-2.38161	9.38354e-13	1.60178e-10	19.637
NCAPG2	-1.8752	2.46563e-09	6.06121e-08	11.782
SH3KBP1	-2.90313	1.54591e-14	9.412e-12	23.6788
CCNB3	-1.89534	1.1379e-06	9.20667e-06	5.78527
GINS4	-1.48884	2.19272e-08	3.57776e-07	9.48461
FAM83A	-1.84435	1.89163e-11	1.35639e-09	16.5232
SIGMAR1	-1.08794	4.24114e-08	6.11883e-07	8.4732
CEP78	-1.29814	1.6952e-07	1.91901e-06	7.36979
PDSS1	-1.15402	1.14187e-06	9.23251e-06	5.48842
MKI67	-2.44091	1.6998e-09	4.56547e-08	12.1368
ITPRIP	-1.9222	8.86446e-10	2.73395e-08	12.8135
CHEK1	-1.15352	4.67052e-08	6.62322e-07	8.61135
HIRIP3	-2.16505	3.42326e-11	2.13553e-09	16.0562
HMGA2	-2.47018	6.50468e-10	2.12752e-08	13.1365
SLC7A11	-5.00943	5.25487e-15	4.36273e-12	23.91
TEX30	-1.5248	1.98593e-10	8.22518e-09	14.1929
SCLT1	-1.73129	9.07097e-08	1.1348e-06	8.15784
EDNRA	-2.67475	1.23233e-11	9.69238e-10	17.0625
ADAM8	-2.06197	6.17122e-12	6.06007e-10	17.7659
CENPU	-3.05697	1.84598e-13	5.52337e-11	21.2334
AMN1	-1.76971	1.58197e-07	1.81158e-06	7.64121
SPC25	-2.88169	1.11503e-08	2.07816e-07	10.2943
PDK1	-2.02639	1.71919e-08	2.93741e-07	9.90346
CENPH	-2.5446	7.70488e-12	6.81267e-10	17.54
ADGRF4	-2.67118	7.18419e-12	6.59393e-10	17.5927
ASAP1	-1.44846	2.07583e-09	5.32407e-08	11.8688
PID1	-1.75128	7.54787e-06	4.5908e-05	3.89219
CEBPG	-1.72802	1.89541e-11	1.35639e-09	16.5696
DGKE	-1.22594	0.000115879	0.000472124	0.994227
C16orf74	-1.45212	3.38086e-09	7.82653e-08	11.3297
NRGN	-2.38723	9.33499e-05	0.000393955	1.60496
PITPNC1	-1.36604	1.11264e-06	9.02415e-06	5.46984
SKA1	-3.8799	2.14215e-11	1.4991e-09	16.1026
EME1	-1.77556	1.97373e-06	1.47626e-05	5.22245
OTUD6B	-1.27708	1.49208e-07	1.72486e-06	7.56666
NIFK	-1.04264	2.25688e-07	2.41204e-06	6.77981
DCK	-1.5471	8.7373e-05	0.000372344	0.825109
SFR1	-1.04273	1.28472e-06	1.02335e-05	5.3723
TBC1D31	-1.55916	6.4755e-07	5.78079e-06	6.26326
ATAD2	-2.16008	2.42601e-06	1.77315e-05	4.69427
BUB1B	-2.11235	9.77063e-06	5.68889e-05	3.71588
NRG1	-2.75971	6.55758e-14	2.78545e-11	22.2551
LRP8	-1.61667	4.88426e-06	3.18724e-05	4.20192
STEAP2	-2.32409	3.53729e-10	1.31854e-08	13.7456
CCNB2	-3.04409	5.38293e-13	1.14325e-10	20.1637
FANCC	-1.14555	1.06629e-06	8.71143e-06	5.52021
CDC25C	-3.4228	6.81598e-08	9.06068e-07	8.51107
GART	-1.47723	1.17626e-08	2.17014e-07	9.88922
CHAF1B	-1.59542	4.04975e-08	5.93172e-07	8.93643
HK2	-1.21426	1.08275e-05	6.2112e-05	3.36052
TNFRSF13C	-3.74252	9.77352e-05	0.000408404	1.35809
PDE9A	-1.75476	2.15122e-06	1.59383e-05	5.00765
COX6B2	-2.17034	1.41656e-06	1.11379e-05	5.60377
RECQL4	-1.57667	3.49609e-09	7.98201e-08	11.3332
BDH1	-1.27914	2.2943e-05	0.000117844	2.58969
KASH5	-2.3286	1.63671e-07	1.86608e-06	7.69753
DBF4B	-2.39324	7.79396e-05	0.000337113	1.75808
RACGAP1	-2.48302	4.50269e-09	9.83579e-08	11.091
SPC24	-1.20117	0.000113147	0.000463579	1.16993
MEIOB	-3.95741	2.14553e-13	5.9376e-11	20.7252
LAPTM5	-4.42191	2.28738e-10	9.142e-09	13.7177
USP1	-1.23333	1.36754e-06	1.08365e-05	5.13874
IER5	-1.2949	1.11599e-09	3.24578e-08	12.3235
CCDC138	-1.00551	5.00489e-05	0.000231194	1.75567
VSNL1	-3.92679	0.000169264	0.000652002	0.834777
TGFA	-1.38153	6.22386e-09	1.29328e-07	10.674
CCNYL1	-1.45192	2.45766e-08	3.92045e-07	9.23795
NIPAL1	-1.19909	4.00317e-07	3.86361e-06	6.53312
ANTXR2	-1.55043	1.72614e-08	2.94378e-07	9.74658
CLDN1	-1.19493	6.22596e-07	5.59487e-06	5.9259
CIP2A	-2.34208	2.63084e-06	1.90005e-05	4.95681
CHCHD4	-1.35064	1.93445e-07	2.12976e-06	7.07733
SGO2	-1.53082	1.11197e-05	6.34689e-05	3.47029
KIF15	-3.13751	1.18972e-07	1.42148e-06	8.01452
RFC4	-1.10563	6.9381e-09	1.41592e-07	10.5423
RFT1	-1.20675	1.92582e-09	5.01505e-08	11.8241
CDC25A	-1.8052	1.4571e-05	7.99935e-05	3.19
SPRY1	-1.1216	2.3132e-05	0.000118681	2.15764
MST1R	-1.87	3.32634e-11	2.11692e-09	16.0508
DUSP7	-1.31389	2.12401e-09	5.41076e-08	11.7816
POC1A	-2.54989	3.91318e-10	1.42379e-08	13.6402
HMGB2	-2.76684	1.14641e-15	2.09994e-12	26.279
SAP30	-1.32184	4.89996e-10	1.70472e-08	13.2455
MAD2L1	-2.53333	1.90513e-13	5.52337e-11	21.2297
ITGA2	-2.09327	7.9388e-11	4.09611e-09	15.1237
NDUFAF2	-1.02731	4.6202e-08	6.57227e-07	8.48244
RAET1E	-4.39072	3.36455e-08	5.08721e-07	8.61285
STK17A	-1.72126	4.06347e-07	3.91452e-06	6.1787
GALNT10	-1.06464	6.0286e-09	1.26131e-07	10.6192
PTTG1	-2.41223	5.25803e-08	7.31996e-07	8.52247
STEAP1	-1.45586	5.44381e-10	1.8606e-08	13.2036
CDCA7L	-1.18055	2.32449e-07	2.47273e-06	6.99782
ADCY1	-1.51223	3.19774e-08	4.87129e-07	9.19481
LETM2	-2.68125	3.98061e-10	1.44258e-08	13.6023
ZNF367	-1.92577	1.55095e-05	8.43348e-05	3.24076
MELK	-3.17511	1.82644e-13	5.52337e-11	21.1259
GJB2	-1.86537	3.39823e-06	2.3502e-05	4.67987
SKA3	-3.31509	1.22008e-12	1.9211e-10	19.1311
LRR1	-1.46785	6.64367e-09	1.36652e-07	10.6388
HPRT1	-1.36905	4.0271e-10	1.45628e-08	13.3513
DDX21	-1.35346	3.84053e-10	1.40696e-08	13.4038
E2F7	-3.29252	1.28105e-05	7.18626e-05	3.48583
IDH3A	-1.23498	1.91107e-09	4.98654e-08	11.8759
CENPN	-1.73632	6.30646e-09	1.30895e-07	10.7889
MCM7	-1.05406	2.29744e-08	3.71024e-07	9.12376
PLK1	-3.21643	6.62201e-12	6.23459e-10	17.589
NEMP1	-1.23499	2.31795e-05	0.000118858	2.65615
RCCD1	-1.0422	4.22709e-07	4.03464e-06	6.32915
CDT1	-2.08601	4.35682e-10	1.5422e-08	13.5025
RHEBL1	-1.95908	3.93115e-06	2.6564e-05	4.4736
CHAF1A	-1.26061	9.33742e-07	7.85935e-06	5.7628
ANGPTL4	-1.77065	3.61441e-05	0.000173958	2.45375
NUDT8	-1.233	5.58808e-06	3.55632e-05	3.77983
TMC8	-2.04442	2.55699e-08	4.04017e-07	9.52244
TK1	-2.18709	7.23964e-12	6.6116e-10	17.5622
PBK	-3.25759	9.68344e-11	4.78022e-09	15.0285
ACOX2	-5.8515	6.39357e-08	8.5993e-07	8.01053
DTYMK	-1.04899	1.88952e-09	4.96083e-08	11.7424
MLKL	-1.47688	8.71942e-07	7.42818e-06	5.84231
SLC35G2	-1.9196	2.23204e-05	0.000115067	2.91052
MAP2K1	-1.51184	3.18147e-09	7.4787e-08	11.2703
CKAP2L	-3.70345	4.54317e-12	5.02915e-10	17.8525
BUB1	-2.98161	1.22661e-10	5.65758e-09	14.7541
ADRA1B	-2.19583	2.44853e-09	6.0354e-08	11.8083
CDK1	-2.87395	1.04333e-13	3.97009e-11	21.716
ADORA2B	-1.91676	6.72398e-13	1.29251e-10	19.9587
PA2G4	-1.25108	3.60924e-11	2.21217e-09	15.8257
ELOVL6	-1.21811	1.08537e-06	8.84616e-06	5.41424
CDCA4	-1.11846	6.53455e-10	2.12752e-08	12.8945
NETO2	-1.41908	1.64301e-09	4.44189e-08	11.9726
SHCBP1	-2.74506	5.82582e-11	3.18295e-09	15.4534
ESCO2	-3.42764	4.72871e-07	4.42922e-06	6.63527
RHNO1	-1.24834	2.49517e-09	6.0935e-08	11.5712
CTPS1	-1.6732	1.25536e-09	3.57151e-08	12.3101
RRM2	-3.18276	4.81779e-14	2.19992e-11	22.5495
PRNP	-1.25982	3.9004e-07	3.78739e-06	6.24445
MIR31HG	-3.22976	1.01932e-05	5.88803e-05	3.59429
MOB3A	-1.99376	1.33444e-09	3.74496e-08	12.3855
CYCS	-1.34771	1.42703e-10	6.32636e-09	14.3928
MTBP	-1.14418	3.17983e-05	0.000156002	2.33096
MALT1	-2.31075	2.19262e-11	1.52856e-09	16.5057
C5orf34	-2.40622	7.78266e-07	6.73764e-06	6.1842
MYEOV	-2.88272	6.77573e-13	1.29251e-10	19.9601
GRK2	-1.33955	1.82081e-08	3.06574e-07	9.52321
CKS1B	-2.20557	4.03436e-10	1.45628e-08	13.4601
EHBP1L1	-1.2665	2.07832e-09	5.32407e-08	11.7516
PPP1R14B	-1.00325	7.21706e-09	1.4598e-07	10.311
CEP83	-1.17894	1.16931e-05	6.64516e-05	3.29423
PLK3	-1.00332	1.89706e-05	0.000100405	2.62011
EXO1	-2.2245	3.83243e-07	3.73529e-06	6.8276
FAM241A	-3.08772	4.82852e-12	5.24523e-10	18.008
RIN1	-1.36435	3.62143e-06	2.47922e-05	4.45868
ZDHHC14	-1.57195	2.08895e-05	0.000108672	2.91867
UBE2C	-2.57558	4.99795e-12	5.32226e-10	17.9551
CKAP5	-1.45622	3.69247e-09	8.35531e-08	11.2245
CCNE2	-2.14693	1.25625e-05	7.05576e-05	3.34954
MCTP1	-5.91433	7.72854e-07	6.70921e-06	5.41765
LONRF3	-1.9614	2.65425e-11	1.79555e-09	16.2972
FOSL1	-4.256	1.14465e-15	2.09994e-12	25.9535
RMI2	-1.54756	2.08655e-06	1.55174e-05	4.86323
MTLN	-1.43282	4.23781e-11	2.46595e-09	15.7055
RUVBL1	-1.55632	7.13766e-11	3.7679e-09	15.1336
ETV4	-4.50638	1.22989e-11	9.69238e-10	16.6716
ARL4D	-2.23543	2.24722e-12	2.95031e-10	18.7655
SPHK1	-2.22199	2.50874e-07	2.61691e-06	7.28346
ATAD5	-1.28504	0.000231983	0.000853408	0.437958
TYMS	-1.80241	4.23929e-11	2.46595e-09	15.791
TCIM	-1.2099	2.17346e-07	2.34069e-06	6.787
TYMSOS	-2.19337	3.37009e-09	7.8115e-08	11.515
POLE	-1.57157	3.06006e-06	2.15134e-05	4.62022
IRX3	-1.28107	1.33752e-06	1.06032e-05	4.99797
SHISA3	-3.46518	7.03869e-08	9.28243e-07	8.29391
RPP25	-1.72698	1.48136e-10	6.49983e-09	14.5134
AURKB	-3.09004	1.35471e-10	6.12026e-09	14.691
ARID3B	-2.19012	3.23332e-07	3.22761e-06	6.97084
B3GNT3	-1.79654	2.6009e-08	4.0953e-07	9.45456
ANKRD18A	-1.0948	0.000277314	0.000992386	0.114968
AEN	-1.68927	5.59471e-10	1.88191e-08	13.2464
LINC03040	-2.10885	3.52107e-09	8.01899e-08	11.4589
PHLDA2	-1.28602	3.90564e-11	2.3389e-09	15.7574
GINS3	-1.25631	6.92441e-07	6.10692e-06	6.08583
RTKN2	-1.07761	2.38264e-07	2.51554e-06	7.03782
FAM89A	-1.2083	8.14583e-08	1.03972e-06	7.99241
SHMT2	-1.73835	2.58413e-12	3.26206e-10	18.575
PSMG1	-1.05451	3.18691e-09	7.48188e-08	11.2495
RFLNB	-1.89566	1.06465e-06	8.71143e-06	5.84729
UPP1	-3.90763	1.621e-17	2.96076e-13	30.0303
LIN9	-1.07667	5.26349e-05	0.000241916	1.73553
IQGAP3	-3.61372	0.000159836	0.000620886	1.08343
KMT5A	-1.03044	3.73348e-05	0.000178982	1.88136
CMSS1	-1.90098	8.46341e-12	7.38934e-10	17.3884
KNTC1	-1.65345	3.36838e-06	2.33309e-05	4.68332
OR56A3	-1.21286	1.97614e-05	0.000103749	2.70813
CDCA2	-2.49993	7.65869e-09	1.53048e-07	10.6989
BRI3BP	-1.21337	7.57482e-08	9.80539e-07	8.07534
MAFF	-2.42924	6.24915e-10	2.0603e-08	13.1832
UBALD2	-2.37272	6.21967e-13	1.24838e-10	20.0207
KCNQ5	-1.88817	2.48783e-10	9.79316e-09	14.0648
KIF18B	-2.63053	5.48443e-10	1.86542e-08	13.2641
SAPCD2	-2.13931	1.62974e-10	7.0706e-09	14.3859
MTARC1	-1.65909	1.66912e-05	8.99571e-05	3.16911
KIF24	-1.77929	0.000141077	0.000557744	1.14726
SPRY4	-3.00548	3.20048e-08	4.8714e-07	9.28622
FANCA	-2.16743	4.82046e-11	2.70079e-09	15.7241
EIF4EBP1	-1.94498	8.90112e-13	1.53376e-10	19.6483
S100A3	-1.76349	7.26473e-08	9.50503e-07	8.45948
CENPP	-1.4754	8.5873e-07	7.32856e-06	5.8244
H2AX	-1.68203	2.41442e-10	9.54532e-09	13.9143
FAM72B	-3.97949	4.35569e-05	0.000204568	1.87238
GJB3	-1.61731	1.37161e-08	2.46337e-07	10.0695
LIN54	-1.07876	8.04558e-07	6.92846e-06	5.7721
SYCP2	-1.04005	4.24684e-06	2.83407e-05	4.14876
IL1RAP	-1.25219	3.01368e-08	4.63341e-07	9.18168
CTSE	-3.845	0.000179177	0.000684229	0.753263
IARS1	-1.28184	4.29323e-11	2.47842e-09	15.6517
YRDC	-1.47226	1.71844e-11	1.27074e-09	16.6671
SPTSSB	-1.46415	2.09088e-06	1.55433e-05	4.8653
XRCC2	-2.61391	1.48757e-08	2.62263e-07	10.0554
S100A2	-1.23668	1.00564e-09	3.00621e-08	12.3514
SNHG17	-1.11255	2.59865e-09	6.29501e-08	11.4167
ZNF239	-1.24975	1.11802e-07	1.35236e-06	7.76873
LRRC8B	-1.04845	1.5109e-05	8.24025e-05	2.94234
BLM	-1.90533	1.05046e-07	1.28168e-06	8.08389
RPF2	-1.25266	3.13297e-06	2.195e-05	4.24899
TEAD4	-1.46792	1.8155e-07	2.03311e-06	7.4253
ERO1A	-1.08983	1.93122e-05	0.000101829	2.13128
ZNF273	-1.62828	1.13817e-06	9.20667e-06	5.67751
MAK16	-1.38079	1.77909e-08	3.0084e-07	9.59916
LPAR1	-2.43579	6.83417e-09	1.39627e-07	10.811
TFDP1	-1.1793	3.5664e-09	8.10692e-08	11.1168
RPS6KL1	-1.35943	4.48528e-06	2.9704e-05	4.31597
HYLS1	-1.07617	2.25131e-05	0.000115929	2.50672
NRARP	-1.4223	3.96355e-07	3.83444e-06	6.6452
TMA16	-1.13819	9.89149e-10	2.96177e-08	12.4471
STK39	-2.32658	3.83351e-11	2.32043e-09	15.9493
FAM169A	-2.6385	0.000463355	0.00154016	0.124553
ARHGAP11A	-2.87116	1.46978e-13	5.05622e-11	21.4474
TOP1	-1.52109	7.61514e-10	2.41526e-08	12.6623
PRC1	-3.24834	1.04446e-07	1.27606e-06	8.14264
LINC01285	-1.03467	2.75966e-05	0.000138248	2.19522
CENPW	-1.63573	4.18996e-09	9.29886e-08	11.2124
TAP2	-1.4103	1.86424e-10	7.88949e-09	14.1911
LINC01291	-3.93489	6.1116e-06	3.84263e-05	3.70616
FAM216A	-1.97644	1.15918e-12	1.85723e-10	19.423
MZT1	-1.49054	1.9354e-09	5.02133e-08	11.8262
KRT6A	-2.7219	1.10842e-08	2.07412e-07	10.3129
TRIM59	-1.02064	1.41553e-06	1.11346e-05	5.17107
ARHGAP19	-2.18522	6.22742e-07	5.59487e-06	6.37796
RDUR	-2.58488	0.000195098	0.000735491	0.921523
IFRD2	-1.65781	1.25402e-11	9.7883e-10	16.9506
FAM72D	-3.92575	2.55844e-06	1.85805e-05	4.60617
PPP3R1	-1.76436	0.000140869	0.000557163	1.07792
CYTOR	-1.08042	6.7745e-08	9.01868e-07	8.14874
CLDN10-AS1	-6.53252	1.92003e-07	2.11772e-06	5.96449
ENSG00000225339	-1.07496	0.000240584	0.00088079	0.370411
LINC01907	-3.00709	1.2391e-07	1.46962e-06	7.90113
NAALADL2-AS2	-3.49786	1.42785e-05	7.86941e-05	3.24076
DHFR	-1.397	2.57968e-08	4.06889e-07	9.2693
ENSG00000230882	-2.70083	4.20693e-06	2.8136e-05	4.55241
MANCR	-2.98319	3.14461e-08	4.8104e-07	9.31911
FAM225A	-1.04193	0.00016921	0.000652002	0.549881
DCST1-AS1	-1.04745	0.000354731	0.00122271	0.011039
EMSLR	-1.24882	1.86731e-06	1.40819e-05	5.10298
STEAP1B-AS1	-1.58733	1.50183e-06	1.17226e-05	5.46554
SNHG15	-1.42724	9.57266e-11	4.75121e-09	14.8525
LINC00460	-1.85442	1.51154e-07	1.74185e-06	7.75445
GBX2-AS1	-2.29667	7.00902e-06	4.31334e-05	4.0575
LINC02535	-3.32992	8.02309e-05	0.00034578	1.74348
LINC01723	-4.33825	9.64494e-06	5.62648e-05	3.58826
HGH1	-1.1859	4.11964e-08	6.0148e-07	8.67679
KIAA0040	-1.29848	1.03192e-06	8.50539e-06	5.7527
ZEB1-AS1	-1.54105	0.000225541	0.000834075	0.396928
NR2F1-AS1	-1.46447	6.53225e-11	3.49887e-09	15.3426
TIAM1-AS1	-2.05569	4.62103e-05	0.000215479	2.25643
KIFC1	-2.21081	1.94132e-08	3.22641e-07	9.79144
SCIRT	-2.45002	3.11907e-09	7.37538e-08	11.5923
LINC00973	-3.30225	3.11057e-07	3.12845e-06	6.98265
ETV5	-3.04677	6.9286e-12	6.39145e-10	17.5957
PRR7-AS1	-1.32434	4.86406e-05	0.000225373	1.96158
TNFRSF10A-DT	-2.17996	7.555e-12	6.79764e-10	17.5656
MIR210HG	-1.21097	1.8051e-07	2.02271e-06	7.33719
ENSG00000248112	-3.23876	9.43636e-12	7.94263e-10	17.2642
LUCAT1	-3.22589	1.40218e-12	2.09925e-10	19.0581
PVT1	-1.4989	1.69962e-09	4.56547e-08	12.0791
SH3TC2-DT	-2.14569	4.97384e-06	3.2353e-05	4.38555
CHCHD10	-1.42433	7.64342e-12	6.81267e-10	17.4367
MSRB3-AS1	-5.21938	3.21894e-06	2.2492e-05	3.88747
LINC01843	-3.5081	5.97824e-05	0.000269678	1.85015
LINC00589	-3.45812	3.05745e-06	2.15107e-05	4.85348
FOXD1	-1.877	8.87712e-10	2.73395e-08	12.6015
ENSG00000253130	-4.24585	2.60076e-05	0.000131187	2.2914
EIF5AL1	-1.36765	7.24909e-05	0.000317291	1.38774
PINX1	-1.0142	8.12676e-06	4.88274e-05	3.4992
SLC22A18AS	-3.63874	6.11097e-10	2.02572e-08	13.0291
MIR100HG	-2.49451	1.39612e-07	1.63045e-06	7.8563
LINC02454	-4.11427	2.43905e-05	0.0001243	2.42444
TMPO-AS1	-1.63761	0.000182043	0.000692746	0.802826
ENSG00000257329	-2.26205	1.25856e-08	2.29877e-07	10.2139
MAP3K9-DT	-1.37774	1.30929e-10	5.99355e-09	14.5602
ENSG00000260328	-3.9329	5.82756e-05	0.000263727	1.66168
ATP2A1-AS1	-1.58967	4.3633e-08	6.27525e-07	8.83268
ENSG00000260877	-1.92356	4.55807e-06	3.00879e-05	4.41796
BOP1	-1.00991	4.17706e-08	6.06953e-07	8.56971
VPS9D1-AS1	-1.92959	4.65204e-09	1.01034e-07	11.1926
FAM72C	-3.4511	0.00010979	0.000451546	1.38046
ENSG00000266088	-2.18147	1.23172e-07	1.46277e-06	7.98107
ENSG00000267175	-3.12495	2.44496e-05	0.000124567	2.86464
MALT1-AS1	-4.47379	1.65243e-05	8.9189e-05	2.99973
MIR924HG	-3.12972	1.51478e-07	1.74439e-06	7.66114
ENSG00000267698	-1.61132	0.000115358	0.000470452	1.29575
ENSG00000267764	-4.41809	0.000320261	0.00112061	0.288714
NBPF9	-1.28285	4.37532e-05	0.000205438	2.08181
MILR1	-3.22073	6.28545e-10	2.06854e-08	13.1506
ENSG00000271989	-2.96468	0.000504448	0.00165566	0.0396469
NUP153-AS1	-1.08293	3.05359e-07	3.07633e-06	6.74512
ENSG00000272347	-3.16035	0.000114146	0.00046631	1.39305
ENSG00000272405	-1.34214	2.55848e-09	6.23075e-08	11.6568
ENSG00000272622	-1.47529	1.13409e-05	6.46309e-05	3.39719
UHRF1	-2.30823	4.22793e-07	4.03464e-06	6.74026
ENSG00000276672	-2.31433	0.000480131	0.00158898	0.0738724
ENSG00000280206	-1.64371	3.52171e-08	5.26815e-07	9.08933
ENSG00000280219	-2.08604	5.34189e-05	0.000244965	2.08674
SH3PXD2A-AS1	-4.37821	0.000104344	0.000432065	1.21375
PAGR1	-1.08009	0.000286757	0.00102237	0.125913
ENSG00000283413	-2.53371	0.000291412	0.00103533	0.541486
EEF1AKMT4	-1.02461	1.96679e-07	2.16015e-06	7.08267
LINC00941	-3.83849	3.86389e-11	2.32151e-09	15.6185
ENSG00000288736	-1.5107	1.69235e-05	9.09844e-05	2.97613
ENSG00000289261	-1.52679	0.000216654	0.000804016	0.670953
ENSG00000289609	-2.26688	4.88195e-12	5.24523e-10	18
ENSG00000289942	-1.6513	3.49928e-07	3.4567e-06	6.48802
ENSG00000289985	-1.23264	1.40696e-05	7.76849e-05	3.16261
ENSG00000290058	-1.20587	2.27624e-06	1.66903e-05	4.8541
ENSG00000290729	-3.11386	8.05159e-06	4.84874e-05	3.84237
ENSG00000290937	-2.69903	4.79329e-06	3.1391e-05	4.40844
FAM86B3P	-2.45433	2.76135e-11	1.84748e-09	16.231
FAM86JP	-1.95546	8.87851e-09	1.72334e-07	10.5495
SBDSP1	-1.33508	3.69764e-08	5.49085e-07	8.74084
FAM86DP	-1.55222	5.47461e-08	7.53761e-07	8.70336
ENSG00000291224	-1.38193	9.1578e-08	1.1441e-06	8.01845
RPSAP52	-4.5305	9.66742e-06	5.63598e-05	3.06231
C19orf48P	-1.04987	7.30006e-08	9.54442e-07	8.12729
ENSG00000293879	-3.94508	8.05522e-06	4.84933e-05	3.48722
ENSG00000296183	-3.35706	1.13271e-11	9.03448e-10	17.0845
ENSG00000296559	-2.9994	1.62212e-06	1.25224e-05	5.32379
ENSG00000296964	-2.53448	0.000311782	0.00109577	0.466523
ENSG00000302188	-4.14839	0.000241798	0.000884526	0.529315
ENSG00000304140	-1.69133	1.89973e-10	8.01351e-09	14.2672
ENSG00000304396	-4.31594	4.95121e-05	0.00022883	2.04049
ENSG00000304732	-2.14974	2.56194e-10	1.00416e-08	14.0507
ENSG00000305275	-4.68441	2.53944e-05	0.000128877	2.35525
ENSG00000305512	-2.41329	5.42637e-11	2.98532e-09	15.5904
ENSG00000306315	-2.2082	2.89459e-06	2.05719e-05	4.91098
ENSG00000308072	-1.40094	0.000132758	0.00052967	1.04497
ENSG00000308375	-5.0519	5.44175e-06	3.47895e-05	3.54805
ENSG00000308762	-2.64378	1.63498e-05	8.83258e-05	3.25341
ENSG00000309132	-3.85149	2.83518e-06	2.02204e-05	4.41547
ENSG00000310496	-1.62635	8.71975e-10	2.69943e-08	12.746

## Sheet: H358 Soto vs Vehicle
gene_name	SOTOvsC.logFC	SOTOvsC.P.Value	SOTOvsC.adj.P.Val	SOTOvsC.B	SOTOvsC.B
CYP26B1	-3.02857	1.072e-06	1.36362e-05	5.91531	5.91531
AK2	-1.3223	9.15442e-10	8.94069e-08	12.8083	12.8083
REXO5	-1.79363	4.46791e-05	0.000279823	2.29272	2.29272
ETV1	-10.0708	1.8837e-06	2.12515e-05	3.45852	3.45852
DBF4	-2.89054	2.75166e-11	1.23518e-08	16.147	16.147
E2F2	-3.83516	7.33121e-07	1.01771e-05	6.30636	6.30636
ETV7	-1.21421	0.000121997	0.000641217	1.31105	1.31105
NCAPD2	-1.62779	2.27037e-09	1.60591e-07	11.8435	11.8435
ANLN	-3.16233	1.60139e-11	1.01026e-08	16.9206	16.9206
BRCA1	-3.17472	1.41442e-08	5.78204e-07	10.1672	10.1672
CD22	-3.07481	0.000491809	0.00204595	0.0993314	0.0993314
TACC3	-1.92845	2.46438e-10	3.86064e-08	14.1334	14.1334
POLA2	-3.17927	9.71413e-07	1.26744e-05	6.04061	6.04061
CCDC88C	-1.40246	4.9084e-07	7.41202e-06	6.3926	6.3926
IL20RA	-2.39053	6.3158e-06	5.6247e-05	4.15245	4.15245
DEPDC1	-2.40036	4.28088e-10	5.37228e-08	13.6492	13.6492
FAS	-1.87057	1.89588e-06	2.13626e-05	5.32583	5.32583
CD44	-1.98771	2.115e-07	3.87811e-06	7.27183	7.27183
DEPDC1B	-2.80119	9.98962e-12	8.04061e-09	17.1506	17.1506
SPDL1	-2.56562	2.18507e-09	1.56935e-07	12.0383	12.0383
BARX2	-1.78937	1.90404e-06	2.14086e-05	5.29956	5.29956
SCML1	-2.40442	3.77381e-08	1.11787e-06	9.22283	9.22283
CELF2	-6.00558	5.22755e-06	4.8268e-05	3.84105	3.84105
RAD51	-4.58648	3.63793e-08	1.08036e-06	9.14233	9.14233
POLQ	-3.60027	1.31911e-09	1.13619e-07	12.3199	12.3199
NOP58	-1.21131	2.48794e-07	4.39098e-06	7.0218	7.0218
IL17RB	-3.18931	3.05145e-06	3.11852e-05	4.92664	4.92664
DCBLD2	-2.49335	1.08398e-08	4.82867e-07	10.1954	10.1954
NDC1	-2.19906	1.98993e-09	1.47339e-07	12.0624	12.0624
MCM10	-5.46348	8.25923e-08	1.94146e-06	8.35356	8.35356
MTHFD2	-1.05533	2.29354e-05	0.00016174	2.24647	2.24647
NGEF	-1.26205	5.93859e-06	5.34176e-05	3.91069	3.91069
ASPM	-1.91584	3.37356e-08	1.03333e-06	9.12672	9.12672
STAG3	-1.68685	2.60679e-08	8.63098e-07	9.46181	9.46181
PRR11	-1.722	1.84395e-07	3.51072e-06	7.31401	7.31401
RNF126	-1.35084	1.43902e-06	1.71551e-05	5.33322	5.33322
TCOF1	-2.93027	7.14924e-12	7.25555e-09	17.7175	17.7175
ATP2B1	-1.80568	3.26011e-09	2.11971e-07	11.5457	11.5457
TRIP13	-3.18248	1.93503e-10	3.54627e-08	14.435	14.435
SMC1A	-1.84465	3.84921e-11	1.42616e-08	16.0341	16.0341
HMMR	-2.09193	3.30473e-08	1.01632e-06	9.17677	9.17677
PVR	-2.14811	2.44401e-10	3.8546e-08	14.1893	14.1893
TP63	-1.82482	3.36564e-06	3.37896e-05	4.43199	4.43199
DHRS9	-2.66155	2.10322e-05	0.000150778	3.05896	3.05896
TIPIN	-2.96594	8.31443e-09	4.02646e-07	10.6723	10.6723
GTSE1	-2.6122	7.54585e-08	1.82335e-06	8.49603	8.49603
MOCOS	-1.36209	0.000332442	0.00147948	0.0169987	0.0169987
WDR62	-3.23807	8.72186e-09	4.17184e-07	10.6545	10.6545
MCM6	-4.24011	4.29175e-09	2.54884e-07	11.342	11.342
SPAG5	-2.29709	4.99818e-10	6.01379e-08	13.4854	13.4854
PAG1	-1.36492	2.02812e-07	3.76314e-06	7.32479	7.32479
UBE2T	-3.33059	4.24817e-11	1.48102e-08	15.8042	15.8042
IL4R	-1.20981	2.2248e-05	0.000157846	2.46696	2.46696
POLD3	-1.62743	3.64882e-06	3.61967e-05	4.37196	4.37196
SMC1B	-1.92604	8.04423e-08	1.90967e-06	8.47887	8.47887
SP140	-1.8275	0.000119327	0.000630448	1.41138	1.41138
KIF22	-2.03166	2.70593e-10	4.15539e-08	14.0951	14.0951
PUM3	-1.56099	5.5884e-08	1.47562e-06	8.65117	8.65117
RBL1	-3.24664	3.33982e-09	2.15951e-07	11.5975	11.5975
NDC80	-2.50845	6.91506e-10	7.76251e-08	13.1775	13.1775
ME2	-1.18151	7.44033e-07	1.03008e-05	6.01632	6.01632
AKR1B1	-1.69166	2.42599e-08	8.25472e-07	9.57669	9.57669
ORC1	-3.64894	6.82018e-07	9.60734e-06	6.36825	6.36825
RAD54L	-4.11134	1.03828e-08	4.67866e-07	10.4659	10.4659
LAT2	-2.64432	2.93173e-06	3.0253e-05	4.96398	4.96398
TMPRSS11E	-1.18859	9.43136e-05	0.000516898	0.914239	0.914239
AURKA	-2.51253	1.28641e-09	1.11619e-07	12.5282	12.5282
TPX2	-2.42287	3.16085e-11	1.31751e-08	16.2333	16.2333
SMOX	-1.8326	1.1553e-08	5.0379e-07	10.3739	10.3739
FUS	-1.3394	1.2654e-08	5.38997e-07	10.0437	10.0437
FXYD5	-1.37334	2.16113e-08	7.6432e-07	9.52876	9.52876
BIRC5	-2.36605	3.95338e-12	5.15409e-09	18.3026	18.3026
OTUB2	-2.59978	4.92344e-09	2.78939e-07	11.2339	11.2339
TFAP4	-1.67117	3.26613e-06	3.29892e-05	4.63346	4.63346
KIF4A	-2.00798	1.68634e-08	6.43179e-07	9.87485	9.87485
ITGA6	-3.33721	3.35009e-11	1.34824e-08	16.1851	16.1851
MAP3K20	-2.03321	1.67929e-09	1.32426e-07	12.2698	12.2698
ORC6	-3.66859	6.98367e-10	7.76251e-08	13.0717	13.0717
RGS17	-2.08657	1.77468e-05	0.000131465	3.22976	3.22976
SEMA6A	-2.21327	3.54757e-06	3.53425e-05	4.78086	4.78086
WDR76	-3.6592	4.21152e-07	6.66929e-06	6.83122	6.83122
CLSPN	-5.09935	3.51157e-07	5.79273e-06	7.03479	7.03479
CDC45	-5.29859	5.73828e-06	5.20167e-05	4.30307	4.30307
CDC6	-4.68441	3.37321e-10	4.64504e-08	13.7519	13.7519
TMEM38B	-1.59401	1.25248e-07	2.66746e-06	7.90865	7.90865
CDC7	-2.60497	1.64874e-08	6.35065e-07	10.0381	10.0381
NRP1	-2.56626	7.54379e-09	3.79498e-07	10.7117	10.7117
PRTFDC1	-1.78619	4.12483e-07	6.56877e-06	6.85641	6.85641
RANBP1	-2.25589	1.30155e-08	5.45434e-07	10.0891	10.0891
DERL3	-1.77433	5.53854e-05	0.000332854	1.99177	1.99177
SH3BP1	-1.72829	1.55607e-06	1.82246e-05	5.51801	5.51801
CENPM	-3.49778	3.86055e-10	5.03424e-08	13.4526	13.4526
MCM5	-3.45799	2.33021e-08	7.97532e-07	9.60384	9.60384
DESI1	-1.04423	4.23474e-07	6.6883e-06	6.57612	6.57612
COCH	-1.61019	8.17993e-08	1.93451e-06	8.45271	8.45271
POLE2	-3.54423	1.85041e-07	3.52016e-06	7.65434	7.65434
PYGL	-1.602	1.89989e-08	6.99295e-07	9.66357	9.66357
CDKN3	-2.3422	3.78023e-10	4.98521e-08	13.7658	13.7658
PLEK2	-2.03681	1.05965e-07	2.32705e-06	8.17169	8.17169
ASB2	-8.50685	7.71299e-07	1.05904e-05	3.92715	3.92715
CEP128	-2.52276	6.62258e-08	1.65739e-06	8.63343	8.63343
HIF1A	-2.07878	4.20996e-07	6.66929e-06	6.35242	6.35242
MTHFD1	-1.61067	4.33833e-08	1.23492e-06	8.79123	8.79123
VRK1	-2.89621	3.89971e-08	1.14025e-06	9.1677	9.1677
EMC9	-1.38285	1.28284e-07	2.71892e-06	7.89405	7.89405
MYBL2	-4.01363	1.71853e-10	3.32804e-08	14.5404	14.5404
SLCO4A1	-3.76778	7.34152e-08	1.7832e-06	8.56929	8.56929
CDC25B	-1.31317	3.13047e-07	5.27973e-06	6.76583	6.76583
ARFRP1	-1.16765	6.58215e-08	1.65205e-06	8.52991	8.52991
NOP56	-2.59953	4.17738e-10	5.29937e-08	13.6026	13.6026
JAG1	-3.13879	1.20621e-10	2.58305e-08	14.8701	14.8701
E2F1	-5.23481	4.06789e-07	6.51252e-06	6.89053	6.89053
FAM83D	-2.6735	2.87895e-11	1.24445e-08	16.3146	16.3146
RBFA	-1.27438	5.62605e-06	5.12982e-05	4.19601	4.19601
RBBP8	-1.35832	2.82701e-06	2.93934e-05	4.71652	4.71652
VSIG1	-2.19903	2.61155e-06	2.74836e-05	5.04338	5.04338
SMS	-1.66349	3.03413e-09	2.00004e-07	11.6067	11.6067
SRPX2	-2.99993	1.20002e-10	2.58305e-08	14.9147	14.9147
SLC25A15	-1.08819	5.81564e-06	5.25343e-05	3.99559	3.99559
SLC7A5	-1.33954	5.51235e-06	5.04784e-05	3.56706	3.56706
GABPB1	-1.02481	2.97677e-07	5.06072e-06	7.01569	7.01569
OIP5	-2.01762	2.25233e-07	4.05977e-06	7.44451	7.44451
PLAT	-2.69457	1.19361e-09	1.04741e-07	12.579	12.579
IL7	-2.12345	5.9726e-07	8.64842e-06	6.48878	6.48878
PYCR3	-1.25839	9.66473e-06	7.96308e-05	3.3227	3.3227
ERI1	-1.15109	3.67125e-07	5.98141e-06	6.80182	6.80182
SLC39A14	-1.23215	1.87823e-07	3.5484e-06	7.38578	7.38578
TNFRSF10A	-3.85858	5.69162e-09	3.11863e-07	11.091	11.091
MCM4	-3.87112	2.85204e-09	1.89306e-07	11.6522	11.6522
ASF1B	-3.78705	2.94155e-10	4.36502e-08	13.8786	13.8786
CCNE1	-3.81888	1.31717e-05	0.000102348	3.50459	3.50459
SLC1A5	-1.15352	3.49806e-08	1.05493e-06	8.99532	8.99532
DNAH11	-1.78982	1.41723e-06	1.69385e-05	5.5747	5.5747
ADAP1	-1.94193	8.56246e-06	7.21795e-05	3.69257	3.69257
GRB10	-1.20319	6.30778e-08	1.60738e-06	8.5432	8.5432
STX1A	-1.25977	4.61333e-07	7.08515e-06	6.48441	6.48441
EZH2	-2.22139	3.38299e-10	4.64504e-08	13.8871	13.8871
PLGRKT	-1.57516	1.40144e-07	2.89747e-06	7.84651	7.84651
UBE2S	-3.35042	2.02406e-11	1.11868e-08	16.6856	16.6856
PPIF	-2.42087	1.16332e-08	5.0379e-07	10.3593	10.3593
ABCC3	-1.38659	2.47796e-05	0.000172783	2.38632	2.38632
MMD	-2.27766	5.94786e-08	1.54604e-06	8.72291	8.72291
AREG	-5.73313	4.51001e-10	5.55766e-08	13.5961	13.5961
NEIL3	-3.57203	3.39088e-08	1.03464e-06	9.27603	9.27603
NSD2	-1.64832	1.06981e-09	9.71655e-08	12.6295	12.6295
NCAPG	-3.47303	5.2847e-12	6.46797e-09	17.8601	17.8601
NECTIN1	-1.89544	2.83766e-11	1.24445e-08	16.3475	16.3475
SYT10	-3.12439	0.000253236	0.0011822	0.716283	0.716283
MAGOHB	-1.0091	2.24108e-05	0.000158712	2.75102	2.75102
FOXM1	-2.4303	6.49001e-11	1.94922e-08	15.5284	15.5284
RAD51AP1	-2.92924	1.90201e-07	3.58326e-06	7.63254	7.63254
RFC5	-2.49759	3.91339e-08	1.14085e-06	9.10853	9.10853
CDCA3	-3.18533	2.51297e-11	1.15015e-08	16.2611	16.2611
FBXO5	-2.47281	8.22334e-08	1.94084e-06	8.43718	8.43718
MCM3	-3.20957	5.7336e-09	3.12696e-07	10.9734	10.9734
BAG2	-1.46462	9.6747e-07	1.26372e-05	5.91424	5.91424
ASCC3	-1.31009	1.8194e-09	1.37885e-07	12.1496	12.1496
VEGFA	-2.67299	1.10647e-09	9.93356e-08	12.581	12.581
SLC29A1	-2.31253	9.89383e-09	4.5461e-07	10.5044	10.5044
KIF20A	-1.96564	1.97346e-08	7.13074e-07	9.68672	9.68672
LMNB1	-2.56106	3.97454e-12	5.15409e-09	18.3021	18.3021
PDE4D	-1.43201	3.23441e-05	0.00021436	2.27641	2.27641
BRIX1	-1.64788	6.63492e-10	7.59178e-08	13.1812	13.1812
STC2	-1.77488	9.45783e-06	7.83409e-05	3.24771	3.24771
SMC4	-2.27525	1.31812e-11	9.32349e-09	17.1144	17.1144
PFKFB4	-2.72794	9.5751e-08	2.16155e-06	8.22998	8.22998
HES1	-1.36808	2.54705e-06	2.69997e-05	4.70448	4.70448
GNB4	-2.18395	2.91029e-07	4.96941e-06	7.16016	7.16016
MAPKAPK3	-1.15963	2.99171e-06	3.07361e-05	4.41862	4.41862
CENPA	-2.6633	5.19793e-10	6.19031e-08	13.4181	13.4181
PPM1G	-1.3922	3.13925e-08	9.76132e-07	9.08921	9.08921
LOXL3	-2.44265	1.37328e-05	0.000106037	3.46331	3.46331
CCDC88A	-1.91427	1.61188e-05	0.000120941	2.96379	2.96379
FHL2	-2.80894	8.44686e-09	4.05693e-07	10.6868	10.6868
HPCAL1	-2.33752	1.64672e-09	1.31187e-07	12.248	12.248
ODC1	-1.21888	9.17246e-08	2.09584e-06	8.02832	8.02832
SRSF7	-1.22478	1.72001e-08	6.50704e-07	9.76622	9.76622
WIPF1	-5.88035	6.12014e-05	0.000361022	1.11912	1.11912
PNO1	-1.77854	3.50528e-07	5.78644e-06	6.8306	6.8306
FARSB	-2.08991	2.00561e-09	1.47681e-07	12.0708	12.0708
ERRFI1	-1.69287	3.33505e-06	3.35981e-05	4.28378	4.28378
ARHGEF2	-1.01279	2.69896e-07	4.68744e-06	6.89815	6.89815
SRM	-2.19353	9.90809e-10	9.40141e-08	12.7962	12.7962
UCHL5	-1.7824	3.64071e-10	4.85608e-08	13.8017	13.8017
AGMAT	-2.12576	1.77399e-06	2.03132e-05	5.40558	5.40558
TTF2	-2.52418	1.01062e-09	9.51201e-08	12.802	12.802
AIRIM	-1.25105	2.56069e-07	4.49412e-06	7.21624	7.21624
CDC20	-2.38818	1.87171e-10	3.49516e-08	14.4505	14.4505
NEK2	-1.56898	2.36472e-07	4.21997e-06	7.22336	7.22336
CENPF	-2.12502	9.39678e-08	2.1399e-06	8.00111	8.00111
MUC5B	-1.29341	4.94004e-07	7.42979e-06	6.36732	6.36732
KIF14	-2.26716	2.03304e-07	3.76902e-06	7.39395	7.39395
ABCG2	-1.81433	0.000433518	0.00184069	0.0186028	0.0186028
CTNNAL1	-2.00653	4.83385e-10	5.87665e-08	13.5298	13.5298
PHF19	-1.71131	3.03507e-08	9.56069e-07	9.24823	9.24823
OGFRL1	-1.73215	1.78357e-06	2.03779e-05	4.98037	4.98037
HELLS	-3.72051	1.05974e-07	2.32705e-06	8.18324	8.18324
GOT1	-1.88558	1.11026e-08	4.89106e-07	10.401	10.401
CD274	-2.2044	6.05422e-07	8.74491e-06	6.41258	6.41258
MTHFD1L	-1.72965	8.9909e-07	1.1945e-05	5.87586	5.87586
MASTL	-2.44646	1.96249e-09	1.45887e-07	12.1287	12.1287
EXOSC8	-1.65853	1.46477e-08	5.87468e-07	10.0933	10.0933
TMPO	-2.61611	1.7082e-12	3.71203e-09	19.1286	19.1286
DUSP4	-3.29133	6.24919e-10	7.25714e-08	13.2741	13.2741
NCAPH	-2.74199	2.86215e-08	9.1393e-07	9.39447	9.39447
KIF18A	-1.85816	7.79433e-09	3.86536e-07	10.7791	10.7791
TMEM156	-2.47695	1.09369e-06	1.38669e-05	5.49761	5.49761
GPSM2	-1.52706	8.0394e-09	3.94904e-07	10.6502	10.6502
CCDC18	-2.28845	2.11733e-09	1.53487e-07	12.0129	12.0129
ZWINT	-2.81257	3.96351e-09	2.39679e-07	11.432	11.432
ADGRE5	-1.44867	1.04487e-07	2.30524e-06	7.95542	7.95542
CENPK	-3.05816	1.39051e-08	5.73449e-07	10.2063	10.2063
CDK2	-2.64026	1.16966e-10	2.57163e-08	14.9405	14.9405
TUBA1B	-3.29567	9.42859e-13	2.75103e-09	19.7378	19.7378
STIL	-2.82394	5.74021e-10	6.6994e-08	13.3589	13.3589
HJURP	-3.4032	2.15665e-11	1.11868e-08	16.5482	16.5482
NDUFAF4	-1.88424	4.54914e-07	7.02152e-06	6.77711	6.77711
G0S2	-5.05738	2.40373e-05	0.000168523	2.61571	2.61571
EXOSC9	-1.56544	4.41542e-08	1.24927e-06	8.9722	8.9722
TOX2	-4.21904	5.83198e-08	1.52271e-06	8.37234	8.37234
EEF1E1	-1.67623	5.28584e-06	4.86907e-05	4.28922	4.28922
EREG	-4.33497	1.27393e-08	5.39108e-07	10.2215	10.2215
SOX21	-1.92656	1.45166e-06	1.72528e-05	5.5611	5.5611
HROB	-2.91369	1.85258e-06	2.09714e-05	5.41375	5.41375
SLC25A19	-3.7212	2.32391e-07	4.16946e-06	7.43787	7.43787
MIR9-1HG	-1.71279	8.80908e-06	7.38318e-05	3.68238	3.68238
SLC2A4RG	-1.02134	3.38676e-08	1.03464e-06	9.07456	9.07456
SH2D3A	-1.43908	4.6927e-05	0.000291012	1.80341	1.80341
FOXA2	-5.94232	3.61951e-10	4.85555e-08	13.2135	13.2135
MCM8	-3.28042	1.01522e-08	4.61035e-07	10.495	10.495
XRCC3	-3.59488	7.51616e-09	3.78925e-07	10.8157	10.8157
BCL2L12	-1.66888	4.8418e-09	2.75652e-07	11.2456	11.2456
SBDS	-1.19523	1.31268e-06	1.60338e-05	5.38438	5.38438
TRAP1	-1.0478	1.28363e-07	2.71892e-06	7.66412	7.66412
DLGAP5	-2.04996	1.15383e-09	1.0237e-07	12.6283	12.6283
AUNIP	-4.01309	1.31691e-07	2.76184e-06	7.69986	7.69986
PKMYT1	-4.73911	2.00404e-07	3.73331e-06	7.5764	7.5764
PAICS	-2.09245	8.26008e-13	2.75103e-09	19.8646	19.8646
CDC42EP1	-1.82003	4.36044e-06	4.19199e-05	4.1045	4.1045
LIF	-2.9806	9.58696e-11	2.26039e-08	15.131	15.131
RIBC2	-3.34402	1.33352e-06	1.6209e-05	5.65815	5.65815
STRIP2	-2.44589	0.000372716	0.00162676	0.357801	0.357801
KNSTRN	-2.44148	9.63634e-10	9.18088e-08	12.8492	12.8492
DUT	-1.62233	6.03106e-08	1.55891e-06	8.47413	8.47413
E2F8	-2.79373	1.14188e-07	2.47235e-06	8.1317	8.1317
PIMREG	-3.18513	7.31557e-10	7.83302e-08	13.0342	13.0342
EGLN3	-3.39985	9.86832e-06	8.09259e-05	3.52135	3.52135
RNASE1	-1.64956	0.000228317	0.00108277	0.589506	0.589506
SGO1	-2.91063	1.28778e-08	5.42588e-07	10.1601	10.1601
TOMM40	-2.33068	4.22529e-10	5.33118e-08	13.6284	13.6284
CEP85	-1.69694	1.75404e-07	3.39775e-06	7.50858	7.50858
ZNF331	-1.39525	1.44989e-07	2.96352e-06	7.7628	7.7628
GINS2	-4.8327	9.87123e-09	4.5461e-07	10.5117	10.5117
HAUS8	-2.77792	7.61461e-08	1.83237e-06	8.50484	8.50484
PSMC3IP	-3.04901	1.31521e-06	1.60545e-05	5.72142	5.72142
ANO1	-2.20616	6.09068e-08	1.56893e-06	8.71816	8.71816
TOP2A	-2.44971	5.20011e-11	1.69901e-08	15.709	15.709
KHDRBS3	-2.43206	8.99182e-08	2.06989e-06	8.36537	8.36537
BRME1	-2.57575	6.20683e-07	8.91019e-06	6.46721	6.46721
PPARG	-2.43538	8.03911e-06	6.84628e-05	3.9479	3.9479
NUP210	-1.72714	3.94116e-06	3.84593e-05	4.11829	4.11829
SCLY	-2.65186	5.99055e-07	8.66902e-06	6.44058	6.44058
FIGNL1	-2.3073	9.64699e-08	2.16728e-06	8.22514	8.22514
PCNA	-3.10741	2.57104e-08	8.56109e-07	9.39211	9.39211
RFC3	-3.52995	6.30196e-09	3.32806e-07	10.98	10.98
MORC4	-1.02402	4.85245e-06	4.55249e-05	4.1507	4.1507
LRRCC1	-1.41308	7.7084e-06	6.6005e-05	3.69466	3.69466
EIF2S1	-1.18944	9.84218e-09	4.5461e-07	10.3431	10.3431
CCNB1	-2.45677	7.99463e-11	2.02838e-08	15.3057	15.3057
IRAK2	-2.5002	1.38504e-08	5.72207e-07	10.1962	10.1962
IL15RA	-1.96452	0.000360437	0.00158205	0.177742	0.177742
DDB2	-1.38939	2.02035e-05	0.000145733	2.75644	2.75644
YARS1	-1.12193	1.77995e-07	3.43084e-06	7.46955	7.46955
PHC2	-1.41935	2.1802e-10	3.67772e-08	14.2802	14.2802
CDCA8	-2.62591	2.37133e-11	1.15015e-08	16.4974	16.4974
RNF138	-1.09419	6.22388e-06	5.55981e-05	3.90785	3.90785
FHOD3	-4.30513	1.60451e-10	3.2506e-08	14.3915	14.3915
CLDN10	-1.4129	0.00011865	0.000627741	0.908521	0.908521
ETS1	-1.02037	4.26961e-05	0.000269646	1.64236	1.64236
WDR36	-1.15564	7.29523e-09	3.70992e-07	10.7044	10.7044
C9orf40	-3.35815	3.47186e-09	2.21388e-07	11.4466	11.4466
PSAT1	-3.09988	2.97493e-10	4.36502e-08	14.0153	14.0153
NT5E	-3.50611	7.43867e-11	1.99579e-08	15.3633	15.3633
TROAP	-1.81721	2.44192e-07	4.32469e-06	7.20802	7.20802
ESPL1	-2.8513	7.88076e-10	8.249e-08	13.0489	13.0489
LTV1	-1.26273	2.08343e-06	2.29501e-05	5.19399	5.19399
RNASEH2B	-1.10187	1.31214e-05	0.000102093	3.12822	3.12822
BORA	-1.82855	1.4437e-07	2.96124e-06	7.86318	7.86318
SRSF1	-1.21779	1.03107e-08	4.66418e-07	10.338	10.338
BRIP1	-3.51382	1.83662e-07	3.50248e-06	7.64122	7.64122
DSCC1	-5.23907	7.15095e-08	1.7515e-06	8.55205	8.55205
MYC	-3.35245	1.5605e-10	3.19821e-08	14.5923	14.5923
ARHGEF39	-2.07935	1.69632e-08	6.4593e-07	10.0112	10.0112
HMGA1	-2.01864	1.64253e-09	1.31187e-07	12.0814	12.0814
TCF19	-4.58127	6.00082e-08	1.55635e-06	8.76689	8.76689
FGFBP1	-5.27809	3.7505e-10	4.97409e-08	13.5109	13.5109
GGH	-1.57606	2.24069e-07	4.04189e-06	7.32291	7.32291
KIF23	-2.93945	6.6247e-13	2.57723e-09	19.9244	19.9244
KNL1	-2.51241	3.33137e-10	4.62862e-08	13.9028	13.9028
ADCY3	-2.83631	1.98754e-07	3.70848e-06	7.41437	7.41437
PNPT1	-1.36181	5.6299e-06	5.13132e-05	3.85245	3.85245
STAMBPL1	-2.22781	5.65759e-07	8.29163e-06	6.56857	6.56857
KIF11	-2.53953	6.11768e-11	1.88184e-08	15.5823	15.5823
DUSP5	-4.0889	2.5433e-09	1.73584e-07	11.6969	11.6969
CEP55	-2.78012	4.07573e-10	5.28531e-08	13.6711	13.6711
BARD1	-1.93195	7.54577e-07	1.04159e-05	6.06506	6.06506
MNS1	-2.28961	7.80721e-06	6.67776e-05	4.00118	4.00118
GPAT3	-3.19813	8.28566e-10	8.48263e-08	12.962	12.962
PRDM5	-1.68068	0.00030029	0.00135893	0.563464	0.563464
CENPE	-2.31661	2.85476e-09	1.89306e-07	11.7132	11.7132
RGS3	-1.39462	2.7955e-07	4.81569e-06	6.92723	6.92723
PHLDA1	-4.40088	1.34783e-13	1.0487e-09	21.5086	21.5086
DUSP6	-9.37717	1.67514e-08	6.39952e-07	8.51317	8.51317
GAS2L3	-2.19803	7.16793e-08	1.75381e-06	8.5705	8.5705
FAM222A	-3.42251	3.61647e-07	5.9239e-06	6.89883	6.89883
SLC7A1	-3.14628	3.61517e-09	2.28068e-07	11.5189	11.5189
BRCA2	-3.28773	8.33182e-09	4.02653e-07	10.7017	10.7017
DIAPH3	-3.43706	5.80177e-08	1.51975e-06	8.80105	8.80105
PIF1	-2.416	8.29113e-07	1.12518e-05	6.14048	6.14048
FANCI	-3.39157	1.09859e-09	9.90091e-08	12.7011	12.7011
TICRR	-3.50702	6.3894e-10	7.38323e-08	13.1908	13.1908
MCTP2	-1.23663	1.9501e-05	0.000141849	2.61274	2.61274
KATNB1	-1.04644	4.91869e-07	7.41202e-06	6.44465	6.44465
KIFC3	-1.59895	5.90556e-07	8.56196e-06	6.21216	6.21216
COPS3	-1.19058	1.66014e-08	6.36304e-07	9.84915	9.84915
PRELID3A	-1.38264	0.000319306	0.00143139	0.260163	0.260163
RNF157	-2.77601	1.10297e-06	1.39694e-05	5.91071	5.91071
DUS3L	-1.16778	3.76323e-06	3.70795e-05	4.4636	4.4636
EPHA2	-2.25504	1.13461e-06	1.42694e-05	5.3462	5.3462
PLK4	-2.84354	2.371e-09	1.65206e-07	11.9574	11.9574
KIF2C	-2.47661	9.24488e-11	2.20198e-08	15.1767	15.1767
UCK2	-2.36752	1.14736e-09	1.0222e-07	12.6479	12.6479
NUF2	-2.79362	2.20071e-10	3.67772e-08	14.2873	14.2873
PFDN2	-1.73572	3.22979e-10	4.54155e-08	13.9228	13.9228
ANP32E	-1.13617	5.55687e-08	1.46898e-06	8.5255	8.5255
DTL	-4.48695	2.2395e-07	4.04189e-06	7.47438	7.47438
TTC13	-1.43218	1.5402e-08	6.08312e-07	10.0939	10.0939
PYCR2	-1.21921	9.03851e-08	2.0745e-06	8.24553	8.24553
LBR	-1.95726	3.09316e-11	1.31274e-08	16.2655	16.2655
CHAC2	-3.28162	1.63039e-06	1.89148e-05	5.52211	5.52211
CDCA7	-5.45215	1.163e-07	2.50662e-06	8.11636	8.11636
FANCD2	-2.98785	4.72188e-09	2.70806e-07	11.2557	11.2557
STAC	-1.50849	7.62703e-05	0.000432742	1.5411	1.5411
COL8A1	-1.34152	3.32928e-07	5.55087e-06	6.6851	6.6851
LYAR	-2.69283	1.0126e-08	4.60743e-07	10.4839	10.4839
ENOPH1	-1.58501	6.7321e-09	3.50842e-07	10.8091	10.8091
AFG2A	-1.60998	1.78473e-08	6.71572e-07	9.94581	9.94581
CCNA2	-2.82318	3.87987e-12	5.15409e-09	18.2693	18.2693
NAF1	-1.47364	7.33354e-07	1.01771e-05	6.20659	6.20659
NKD2	-5.0995	0.000219399	0.00104728	0.814907	0.814907
MYO10	-1.73644	2.24523e-06	2.43986e-05	4.64781	4.64781
TNFAIP8	-2.3314	5.69589e-07	8.33042e-06	6.49074	6.49074
TRIM7	-2.49198	2.57254e-07	4.50137e-06	7.31485	7.31485
MMS22L	-2.72097	1.14845e-08	5.0379e-07	10.3974	10.3974
MTFR2	-3.2338	2.00382e-06	2.22729e-05	5.29646	5.29646
CDCA5	-3.4988	8.50531e-10	8.59442e-08	12.9728	12.9728
NCAPG2	-2.69937	3.29849e-11	1.34824e-08	16.1797	16.1797
SH3KBP1	-1.66448	4.61319e-08	1.29328e-06	8.79542	8.79542
CCNB3	-1.95911	3.45465e-07	5.72069e-06	6.99712	6.99712
GINS4	-3.59389	2.45187e-08	8.30646e-07	9.64606	9.64606
FAM83A	-1.94069	5.20032e-08	1.40819e-06	8.61229	8.61229
SIGMAR1	-2.11844	1.15838e-10	2.57163e-08	14.947	14.947
CEP78	-2.99339	3.01075e-10	4.36502e-08	13.9661	13.9661
PDSS1	-3.18387	1.72381e-07	3.35788e-06	7.70309	7.70309
MKI67	-2.95218	1.03445e-10	2.39071e-08	15.0472	15.0472
ITPRIP	-2.68168	2.78016e-05	0.000190011	2.74253	2.74253
CHEK1	-2.28322	5.03679e-08	1.37668e-06	8.8075	8.8075
HIRIP3	-1.97999	4.08278e-07	6.53189e-06	6.79516	6.79516
HMGA2	-2.9569	2.04412e-12	3.71203e-09	18.82	18.82
SLC7A11	-1.56755	0.00022461	0.00106866	0.144056	0.144056
TEX30	-3.11095	6.03744e-08	1.55891e-06	8.71536	8.71536
SCLT1	-1.80367	3.42664e-08	1.04121e-06	9.31171	9.31171
EDNRA	-2.3881	1.56264e-07	3.13092e-06	7.72862	7.72862
ADAM8	-2.61029	4.39541e-08	1.24663e-06	8.88887	8.88887
CENPU	-2.69587	6.96848e-08	1.71943e-06	8.49153	8.49153
AMN1	-1.06325	0.000281356	0.00128672	0.337746	0.337746
SPC25	-3.74359	1.18628e-09	1.04491e-07	12.1986	12.1986
PDK1	-3.30989	5.29203e-11	1.69901e-08	15.5323	15.5323
CENPH	-1.90606	3.1774e-07	5.33575e-06	7.02839	7.02839
ADGRF4	-1.96522	2.80414e-05	0.000191331	2.59099	2.59099
ASAP1	-1.4169	2.0743e-06	2.28831e-05	4.89263	4.89263
PID1	-2.12527	1.48162e-08	5.91253e-07	10.0543	10.0543
CEBPG	-1.34661	1.61919e-05	0.000121372	2.98889	2.98889
DGKE	-1.3993	2.74249e-06	2.86038e-05	4.90625	4.90625
C16orf74	-1.80055	0.000216303	0.00103568	0.807836	0.807836
NRGN	-3.95251	0.000286438	0.00130637	0.518481	0.518481
PITPNC1	-2.26252	4.55394e-07	7.02152e-06	6.73152	6.73152
SKA1	-3.69564	7.60781e-09	3.81081e-07	10.489	10.489
EME1	-3.06073	1.48562e-08	5.91764e-07	10.1083	10.1083
OTUD6B	-1.24676	8.59577e-08	2.00042e-06	8.25256	8.25256
NIFK	-1.13865	3.61494e-06	3.59063e-05	4.25534	4.25534
DCK	-1.44586	2.75584e-08	8.90036e-07	9.43274	9.43274
SFR1	-1.05714	8.60011e-05	0.000477734	1.50797	1.50797
TBC1D31	-2.00938	2.21446e-09	1.58558e-07	12.0245	12.0245
ATAD2	-3.94677	9.41571e-10	9.0512e-08	12.8431	12.8431
BUB1B	-2.27395	1.17884e-10	2.57163e-08	14.9341	14.9341
NRG1	-3.15402	1.97042e-07	3.68537e-06	7.59783	7.59783
LRP8	-3.83243	4.60294e-09	2.66766e-07	11.2544	11.2544
STEAP2	-1.39258	2.19434e-06	2.39571e-05	4.93478	4.93478
CCNB2	-1.89	3.07456e-08	9.64601e-07	9.26106	9.26106
FANCC	-1.77712	1.53132e-08	6.06905e-07	10.0885	10.0885
CDC25C	-1.68735	7.99327e-07	1.08919e-05	6.10611	6.10611
GART	-1.33148	7.44533e-09	3.76166e-07	10.6336	10.6336
CHAF1B	-3.4203	3.11268e-07	5.25352e-06	7.13789	7.13789
HK2	-1.74387	5.29834e-10	6.24616e-08	13.3814	13.3814
TNFRSF13C	-2.41727	0.000529894	0.00217914	0.0421025	0.0421025
PDE9A	-3.12882	1.57411e-06	1.8399e-05	5.48503	5.48503
COX6B2	-1.89474	0.000103206	0.000558553	1.56507	1.56507
RECQL4	-2.47933	1.2749e-08	5.39108e-07	10.1599	10.1599
BDH1	-1.06882	5.18392e-05	0.000315277	1.8708	1.8708
KASH5	-1.60277	2.99121e-05	0.000201271	2.60661	2.60661
DBF4B	-1.95447	5.84367e-09	3.17216e-07	11.064	11.064
RACGAP1	-2.29485	2.10274e-11	1.11868e-08	16.6495	16.6495
SPC24	-3.30785	3.46971e-09	2.21388e-07	11.5354	11.5354
MEIOB	-2.27666	1.24903e-07	2.66381e-06	8.02547	8.02547
LAPTM5	-4.38903	2.30242e-06	2.4881e-05	5.07934	5.07934
USP1	-1.78787	7.58141e-08	1.82815e-06	8.32589	8.32589
IER5	-1.7087	2.53738e-08	8.49044e-07	9.40308	9.40308
CCDC138	-2.0619	4.81176e-07	7.32178e-06	6.70311	6.70311
VSNL1	-3.36687	1.47447e-06	1.74352e-05	5.27863	5.27863
TGFA	-2.55146	4.01228e-09	2.41252e-07	11.3274	11.3274
CCNYL1	-2.12942	1.64175e-07	3.23936e-06	7.58043	7.58043
NIPAL1	-2.29801	1.87723e-07	3.5484e-06	7.62782	7.62782
ANTXR2	-1.55005	8.03771e-08	1.90967e-06	8.19873	8.19873
CLDN1	-2.11319	4.48693e-07	6.97297e-06	6.62519	6.62519
CIP2A	-3.10113	6.97401e-11	1.98521e-08	15.3485	15.3485
CHCHD4	-1.28656	1.17251e-05	9.32494e-05	3.35811	3.35811
SGO2	-2.22911	1.29377e-08	5.44128e-07	10.2115	10.2115
KIF15	-2.65242	2.14787e-10	3.65953e-08	14.3148	14.3148
RFC4	-2.9851	1.08022e-08	4.82111e-07	10.4552	10.4552
RFT1	-1.28308	1.77465e-07	3.42347e-06	7.51389	7.51389
CDC25A	-4.23845	5.70184e-07	8.3339e-06	6.55679	6.55679
SPRY1	-2.49483	1.64534e-08	6.34804e-07	9.99884	9.99884
MST1R	-1.57776	7.18835e-08	1.75697e-06	8.3019	8.3019
DUSP7	-1.62624	2.6261e-07	4.58477e-06	7.1802	7.1802
POC1A	-2.15825	6.01228e-08	1.55759e-06	8.73695	8.73695
HMGB2	-2.07854	7.64972e-11	2.00077e-08	15.349	15.349
SAP30	-1.72048	1.8225e-07	3.4841e-06	7.66505	7.66505
MAD2L1	-3.35556	4.51708e-11	1.52808e-08	15.8592	15.8592
ITGA2	-1.88902	4.58924e-10	5.60848e-08	13.5544	13.5544
NDUFAF2	-1.19735	0.000214185	0.00102807	0.421224	0.421224
RAET1E	-2.33367	2.5905e-05	0.000179056	2.84239	2.84239
STK17A	-1.78994	9.86819e-07	1.28005e-05	5.66334	5.66334
GALNT10	-2.91633	1.70907e-08	6.48667e-07	9.84645	9.84645
PTTG1	-2.03947	1.06413e-09	9.71655e-08	12.7179	12.7179
STEAP1	-2.23321	1.69306e-07	3.3154e-06	7.6777	7.6777
CDCA7L	-1.69665	3.57795e-06	3.55996e-05	4.37179	4.37179
ADCY1	-2.60712	1.07683e-06	1.36828e-05	5.89931	5.89931
LETM2	-2.6181	2.45867e-05	0.000171673	2.89837	2.89837
ZNF367	-3.01677	1.52936e-05	0.000116092	3.15119	3.15119
MELK	-3.30713	5.31349e-11	1.69901e-08	15.648	15.648
GJB2	-4.13996	7.01433e-05	0.000404468	1.91417	1.91417
SKA3	-3.50049	3.9263e-09	2.39035e-07	11.4326	11.4326
LRR1	-2.65423	2.06757e-06	2.2851e-05	5.22986	5.22986
HPRT1	-2.41381	7.12761e-12	7.25555e-09	17.6609	17.6609
DDX21	-1.55983	1.84328e-09	1.39155e-07	12.0802	12.0802
E2F7	-4.65897	3.13938e-08	9.76132e-07	9.29415	9.29415
IDH3A	-1.16805	9.56901e-07	1.25202e-05	5.70771	5.70771
CENPN	-2.6499	3.56243e-10	4.80678e-08	13.8272	13.8272
MCM7	-2.447	6.18043e-09	3.27872e-07	10.8188	10.8188
PLK1	-2.52611	3.40507e-10	4.64803e-08	13.8674	13.8674
NEMP1	-2.48682	5.12122e-10	6.13023e-08	13.4762	13.4762
RCCD1	-1.54914	1.15942e-08	5.0379e-07	10.3317	10.3317
CDT1	-2.6691	1.15372e-08	5.0379e-07	10.3415	10.3415
RHEBL1	-3.20619	3.01963e-05	0.000202715	2.5232	2.5232
CHAF1A	-3.314	9.34223e-08	2.13164e-06	8.30803	8.30803
ANGPTL4	-6.30632	5.13425e-05	0.000312745	1.77726	1.77726
NUDT8	-1.5801	9.78941e-05	0.000533595	1.32537	1.32537
TMC8	-1.10089	0.000215134	0.00103199	0.189478	0.189478
TK1	-3.03862	3.88397e-09	2.37329e-07	11.3788	11.3788
PBK	-3.05844	2.06107e-10	3.61644e-08	14.3516	14.3516
ACOX2	-6.91513	2.46869e-07	4.36643e-06	5.66823	5.66823
DTYMK	-2.24792	2.13462e-09	1.54052e-07	12.0189	12.0189
MLKL	-1.032	0.000147492	0.000750702	0.713891	0.713891
SLC35G2	-3.47363	8.60802e-05	0.000477946	1.67691	1.67691
MAP2K1	-1.44253	4.82628e-09	2.7544e-07	11.131	11.131
CKAP2L	-2.3811	1.09228e-09	9.88215e-08	12.7217	12.7217
BUB1	-2.29412	1.96103e-10	3.54627e-08	14.4159	14.4159
ADRA1B	-3.27527	1.60948e-09	1.29304e-07	12.341	12.341
CDK1	-3.15822	2.09715e-10	3.61644e-08	14.3597	14.3597
ADORA2B	-2.59908	9.04646e-10	8.87237e-08	12.9023	12.9023
PA2G4	-1.57902	1.035e-09	9.69471e-08	12.6716	12.6716
ELOVL6	-1.23527	8.46718e-08	1.97641e-06	8.17974	8.17974
CDCA4	-2.76919	2.29972e-10	3.72778e-08	14.2637	14.2637
NETO2	-2.89106	7.8747e-12	7.35245e-09	17.6109	17.6109
SHCBP1	-3.27668	1.33648e-08	5.5608e-07	10.2373	10.2373
ESCO2	-3.93925	5.71686e-09	3.12513e-07	10.9969	10.9969
RHNO1	-1.25539	1.34101e-07	2.80232e-06	7.83856	7.83856
CTPS1	-4.15553	7.7482e-11	2.00077e-08	15.2374	15.2374
RRM2	-4.71754	4.13104e-10	5.29817e-08	13.6872	13.6872
PRNP	-1.33639	6.48456e-08	1.63812e-06	8.37056	8.37056
MIR31HG	-4.46735	5.65911e-06	5.15191e-05	3.66639	3.66639
MOB3A	-1.49353	7.14214e-09	3.64796e-07	10.7667	10.7667
CYCS	-2.06847	8.18728e-10	8.41883e-08	12.9604	12.9604
MTBP	-2.21944	1.87858e-07	3.5484e-06	7.58277	7.58277
MALT1	-1.11154	0.000114012	0.000607597	0.918151	0.918151
C5orf34	-3.59508	6.5236e-08	1.64063e-06	8.39491	8.39491
MYEOV	-6.68865	6.12715e-11	1.88184e-08	14.6746	14.6746
GRK2	-1.31853	1.45671e-09	1.22311e-07	12.3026	12.3026
CKS1B	-2.7798	3.12615e-10	4.50435e-08	13.9663	13.9663
EHBP1L1	-1.02996	7.59349e-06	6.52124e-05	3.39131	3.39131
PPP1R14B	-1.26026	5.42461e-09	3.00763e-07	10.9283	10.9283
CEP83	-1.21947	4.81124e-06	4.52055e-05	4.34157	4.34157
PLK3	-1.30242	2.45396e-05	0.000171447	2.67453	2.67453
EXO1	-4.41267	3.75473e-08	1.11363e-06	9.20639	9.20639
FAM241A	-2.19266	6.29908e-08	1.60692e-06	8.71931	8.71931
RIN1	-1.38641	9.75793e-07	1.27033e-05	5.77415	5.77415
ZDHHC14	-3.64699	4.81769e-08	1.33874e-06	8.74896	8.74896
UBE2C	-3.23022	9.12052e-12	7.6406e-09	17.4638	17.4638
CKAP5	-1.38126	7.09129e-08	1.74333e-06	8.314	8.314
CCNE2	-4.47918	9.23732e-07	1.22094e-05	6.0793	6.0793
MCTP1	-1.75907	3.93578e-06	3.84228e-05	4.5664	4.5664
LONRF3	-2.11809	5.94664e-09	3.20569e-07	11.0433	11.0433
FOSL1	-7.73872	9.60891e-08	2.16155e-06	8.02946	8.02946
RMI2	-2.48925	1.10498e-07	2.40827e-06	8.13363	8.13363
MTLN	-1.0488	5.19454e-05	0.000315664	1.82932	1.82932
RUVBL1	-1.46953	5.371e-09	2.99928e-07	11.0151	11.0151
ETV4	-7.98431	2.3748e-10	3.82214e-08	10.4712	10.4712
ARL4D	-1.96705	2.45814e-08	8.31565e-07	9.6245	9.6245
SPHK1	-3.6396	2.64464e-06	2.77552e-05	5.05265	5.05265
ATAD5	-3.33158	7.43405e-08	1.80006e-06	8.55723	8.55723
TYMS	-3.95645	2.06228e-10	3.61644e-08	14.3311	14.3311
TCIM	-1.52959	1.19986e-05	9.4972e-05	3.33804	3.33804
TYMSOS	-2.11606	1.12138e-05	8.97025e-05	3.66938	3.66938
POLE	-2.24376	1.4159e-07	2.91784e-06	7.71382	7.71382
IRX3	-2.02534	4.53989e-08	1.27829e-06	8.92215	8.92215
SHISA3	-3.94323	4.67479e-08	1.30525e-06	8.84344	8.84344
RPP25	-1.79437	7.77865e-06	6.65576e-05	3.62602	3.62602
AURKB	-3.66366	8.77068e-12	7.6406e-09	17.2971	17.2971
ARID3B	-1.43445	1.88175e-06	2.12515e-05	5.3041	5.3041
B3GNT3	-1.07806	5.04043e-05	0.000308075	1.54061	1.54061
ANKRD18A	-1.12375	0.000225207	0.00107106	0.499931	0.499931
AEN	-3.27628	2.89674e-07	4.96437e-06	7.17495	7.17495
LINC03040	-2.39608	6.77711e-08	1.68647e-06	8.59702	8.59702
PHLDA2	-4.35608	4.50494e-09	2.64023e-07	11.3208	11.3208
GINS3	-3.08251	1.14694e-07	2.47658e-06	8.12997	8.12997
RTKN2	-1.05775	0.000177691	0.000880085	0.512028	0.512028
FAM89A	-1.36741	6.10913e-06	5.47827e-05	4.18547	4.18547
SHMT2	-1.06626	1.48333e-09	1.23481e-07	12.3054	12.3054
PSMG1	-1.20566	4.82584e-07	7.33842e-06	6.54297	6.54297
RFLNB	-3.33979	0.000374297	0.00163305	0.360779	0.360779
UPP1	-2.64602	4.61989e-07	7.08845e-06	6.65415	6.65415
LIN9	-2.1497	1.01716e-07	2.25261e-06	8.24381	8.24381
IQGAP3	-2.53689	2.10708e-10	3.61644e-08	14.3438	14.3438
KMT5A	-1.26514	4.43795e-08	1.25412e-06	8.9286	8.9286
CMSS1	-2.20267	4.54611e-09	2.65288e-07	11.3131	11.3131
KNTC1	-2.82903	8.55764e-10	8.61002e-08	12.9651	12.9651
OR56A3	-2.92235	5.00951e-06	4.66236e-05	4.45	4.45
CDCA2	-2.64982	2.39068e-10	3.82214e-08	14.229	14.229
BRI3BP	-2.83451	1.7568e-09	1.36237e-07	12.2227	12.2227
MAFF	-3.14899	2.90095e-07	4.96437e-06	7.11709	7.11709
UBALD2	-1.88317	1.10931e-08	4.89106e-07	10.2907	10.2907
KCNQ5	-1.74142	1.55479e-06	1.82188e-05	5.31976	5.31976
KIF18B	-3.14178	7.42632e-11	1.99579e-08	15.3268	15.3268
SAPCD2	-2.47604	7.21237e-10	7.79403e-08	13.0725	13.0725
MTARC1	-2.77061	5.19571e-05	0.000315664	2.15087	2.15087
KIF24	-2.36798	1.67965e-07	3.29743e-06	7.75536	7.75536
SPRY4	-8.40437	4.64952e-07	7.12132e-06	5.10324	5.10324
FANCA	-3.37741	7.31981e-11	1.99579e-08	15.3779	15.3779
EIF4EBP1	-2.09653	2.7398e-10	4.17989e-08	14.0852	14.0852
S100A3	-2.70379	0.000135932	0.000701976	1.30064	1.30064
CENPP	-2.9509	8.17483e-09	3.99199e-07	10.5276	10.5276
H2AX	-3.2167	2.06736e-12	3.71203e-09	18.9242	18.9242
FAM72B	-2.25956	1.49211e-07	3.02071e-06	7.84098	7.84098
GJB3	-1.78596	1.06218e-06	1.35483e-05	5.83992	5.83992
LIN54	-1.02908	1.55946e-05	0.000118022	2.94687	2.94687
SYCP2	-1.12313	2.23436e-06	2.42917e-05	4.84802	4.84802
IL1RAP	-2.74774	1.82477e-06	2.07168e-05	5.26985	5.26985
CTSE	-3.80075	0.000250199	0.00116943	0.0159505	0.0159505
IARS1	-1.29164	1.7714e-08	6.6798e-07	9.69044	9.69044
YRDC	-1.7715	3.9434e-08	1.14772e-06	9.11617	9.11617
SPTSSB	-1.70901	2.35284e-07	4.20199e-06	7.30302	7.30302
XRCC2	-4.28644	7.13875e-08	1.75034e-06	8.57745	8.57745
S100A2	-1.32575	1.11714e-05	8.93943e-05	2.94051	2.94051
SNHG17	-1.54705	8.65088e-06	7.27409e-05	3.46501	3.46501
ZNF239	-1.67152	7.0857e-07	9.89201e-06	6.31591	6.31591
LRRC8B	-1.21057	0.000145071	0.000740505	0.625226	0.625226
BLM	-3.41393	1.37432e-08	5.69123e-07	10.22	10.22
RPF2	-1.28768	5.49498e-07	8.1231e-06	6.34778	6.34778
TEAD4	-2.3113	6.89405e-07	9.67072e-06	6.37413	6.37413
ERO1A	-1.13666	9.17658e-09	4.35365e-07	10.3543	10.3543
ZNF273	-1.47337	5.65166e-05	0.000338086	1.93929	1.93929
MAK16	-1.59816	3.48082e-09	2.21388e-07	11.5265	11.5265
LPAR1	-2.11876	3.55209e-05	0.00023155	2.25858	2.25858
TFDP1	-1.7054	1.13871e-07	2.46794e-06	7.83106	7.83106
RPS6KL1	-1.66836	0.000148853	0.000756482	1.08939	1.08939
HYLS1	-1.99115	5.12464e-08	1.39092e-06	8.91708	8.91708
NRARP	-2.90496	8.24548e-08	1.94146e-06	8.35333	8.35333
TMA16	-1.11344	1.62627e-07	3.2219e-06	7.5883	7.5883
STK39	-1.10341	0.000112052	0.000599754	0.629798	0.629798
FAM169A	-1.45842	0.000187811	0.00092273	0.850462	0.850462
ARHGAP11A	-2.69875	1.55604e-11	1.00892e-08	16.8996	16.8996
TOP1	-1.40751	1.04249e-09	9.69471e-08	12.6435	12.6435
PRC1	-2.61002	1.88264e-08	6.95011e-07	9.70956	9.70956
LINC01285	-1.17993	0.000188174	0.000923542	0.890941	0.890941
CENPW	-2.85555	4.51312e-09	2.64023e-07	11.0369	11.0369
TAP2	-1.80642	3.21627e-06	3.26126e-05	4.53728	4.53728
LINC01291	-3.26902	2.84948e-08	9.1113e-07	8.95454	8.95454
FAM216A	-2.96015	2.89865e-10	4.36502e-08	13.7844	13.7844
MZT1	-1.84324	1.50645e-09	1.23815e-07	12.4065	12.4065
KRT6A	-3.44188	8.23057e-06	6.9861e-05	3.91558	3.91558
TRIM59	-1.36219	6.3708e-09	3.35027e-07	10.9179	10.9179
ARHGAP19	-1.51261	3.66641e-07	5.98053e-06	6.93911	6.93911
RDUR	-3.50413	1.00313e-06	1.29437e-05	5.68958	5.68958
IFRD2	-2.49936	1.62192e-08	6.28772e-07	9.95246	9.95246
FAM72D	-3.23042	2.50403e-07	4.41121e-06	7.04572	7.04572
PPP3R1	-1.01156	1.62021e-06	1.88247e-05	5.09651	5.09651
CYTOR	-2.75036	2.72741e-06	2.8472e-05	4.97491	4.97491
CLDN10-AS1	-3.73422	0.000465714	0.001952	0.101635	0.101635
ENSG00000225339	-2.01281	3.55363e-07	5.84558e-06	7.01743	7.01743
LINC01907	-1.68157	0.00017084	0.000850809	1.09184	1.09184
NAALADL2-AS2	-4.31352	7.72051e-05	0.000436561	0.966977	0.966977
DHFR	-1.53009	1.19963e-08	5.16636e-07	10.2796	10.2796
ENSG00000230882	-1.84861	1.29956e-06	1.59068e-05	5.45211	5.45211
MANCR	-4.26091	8.81758e-08	2.04111e-06	8.35978	8.35978
FAM225A	-1.63536	0.000210658	0.00101343	0.889638	0.889638
DCST1-AS1	-1.28208	0.000218133	0.00104273	0.697402	0.697402
EMSLR	-1.64634	0.000136734	0.000705181	1.036	1.036
STEAP1B-AS1	-2.81794	6.46173e-05	0.000377679	2.00664	2.00664
SNHG15	-2.31291	3.36485e-06	3.37896e-05	4.61695	4.61695
LINC00460	-3.18671	9.47425e-07	1.2431e-05	5.7524	5.7524
GBX2-AS1	-2.87609	0.000164789	0.000824722	1.11308	1.11308
LINC02535	-6.61471	1.40764e-06	1.68671e-05	4.06399	4.06399
LINC01723	-3.31176	0.00033155	0.00147579	0.191369	0.191369
HGH1	-1.38416	1.6342e-07	3.22988e-06	7.58559	7.58559
KIAA0040	-1.48311	4.847e-07	7.361e-06	6.67283	6.67283
ZEB1-AS1	-1.08917	0.000138584	0.000712988	1.0511	1.0511
NR2F1-AS1	-1.20777	6.77233e-05	0.000393167	1.46005	1.46005
TIAM1-AS1	-3.04536	3.10928e-06	3.16791e-05	4.78514	4.78514
KIFC1	-2.88658	1.99933e-11	1.11868e-08	16.6683	16.6683
SCIRT	-2.42923	8.10009e-08	1.91952e-06	8.4603	8.4603
LINC00973	-5.73126	1.06679e-11	8.30037e-09	15.6684	15.6684
ETV5	-10.0133	5.84047e-08	1.52322e-06	5.95049	5.95049
PRR7-AS1	-3.59082	0.000116535	0.000618919	1.3961	1.3961
TNFRSF10A-DT	-2.75811	7.41833e-06	6.40853e-05	3.98258	3.98258
MIR210HG	-1.93966	1.34698e-07	2.80772e-06	7.97348	7.97348
ENSG00000248112	-2.4695	1.26564e-06	1.55897e-05	5.73522	5.73522
LUCAT1	-5.36415	2.36622e-09	1.65206e-07	10.9987	10.9987
PVT1	-1.00716	5.11411e-05	0.000311843	1.69445	1.69445
SH3TC2-DT	-3.00352	0.000107494	0.000578272	1.45296	1.45296
CHCHD10	-1.65875	8.83002e-07	1.18049e-05	5.82149	5.82149
MSRB3-AS1	-7.08366	5.38068e-06	4.94277e-05	2.6796	2.6796
LINC01843	-2.43109	4.38507e-05	0.000275447	2.37353	2.37353
LINC00589	-2.55154	1.88206e-06	2.12515e-05	5.39828	5.39828
FOXD1	-2.79639	3.84866e-10	5.03424e-08	13.7112	13.7112
ENSG00000253130	-3.74163	6.50168e-05	0.000379343	1.44616	1.44616
EIF5AL1	-2.26372	9.34599e-07	1.22877e-05	6.07796	6.07796
PINX1	-1.75231	4.76333e-05	0.000294142	2.25488	2.25488
SLC22A18AS	-1.69859	1.94501e-06	2.17539e-05	5.36654	5.36654
MIR100HG	-2.44259	1.40554e-07	2.9008e-06	7.92847	7.92847
LINC02454	-6.4587	3.26434e-06	3.29854e-05	3.68974	3.68974
TMPO-AS1	-2.50322	1.05465e-06	1.34817e-05	5.95561	5.95561
ENSG00000257329	-3.25404	5.44747e-08	1.4532e-06	8.62696	8.62696
MAP3K9-DT	-3.63064	1.06431e-10	2.43559e-08	14.9951	14.9951
ENSG00000260328	-2.35863	6.19264e-07	8.90078e-06	6.46286	6.46286
ATP2A1-AS1	-2.32711	1.15306e-05	9.19535e-05	3.64832	3.64832
ENSG00000260877	-5.59998	1.99454e-07	3.71858e-06	6.37144	6.37144
BOP1	-2.50966	5.49584e-11	1.73356e-08	15.6896	15.6896
VPS9D1-AS1	-2.3233	1.50435e-09	1.23815e-07	12.4064	12.4064
FAM72C	-2.89564	1.93772e-05	0.000141168	3.08887	3.08887
ENSG00000266088	-5.31388	2.5622e-08	8.54383e-07	7.88187	7.88187
ENSG00000267175	-3.70677	0.000285229	0.00130162	0.572647	0.572647
MALT1-AS1	-3.45441	4.39599e-05	0.000276059	2.23766	2.23766
MIR924HG	-2.97264	2.22665e-08	7.80399e-07	9.33198	9.33198
ENSG00000267698	-2.74468	0.000458021	0.00192563	0.175923	0.175923
ENSG00000267764	-4.85668	0.000138919	0.000714121	0.506421	0.506421
NBPF9	-1.01989	4.88077e-06	4.56988e-05	4.24576	4.24576
MILR1	-1.33411	0.00021964	0.00104822	0.299625	0.299625
ENSG00000271989	-4.04344	0.00021616	0.00103563	0.19228	0.19228
NUP153-AS1	-1.99436	2.48936e-05	0.000173401	2.90059	2.90059
ENSG00000272347	-5.45868	1.39009e-05	0.000107052	2.14772	2.14772
ENSG00000272405	-1.10834	5.61025e-06	5.12157e-05	3.83961	3.83961
ENSG00000272622	-2.62304	2.52675e-08	8.48624e-07	9.59812	9.59812
UHRF1	-3.71501	9.4816e-09	4.46791e-07	10.5865	10.5865
ENSG00000276672	-3.15455	0.000124005	0.000649451	1.34786	1.34786
ENSG00000280206	-2.3041	1.70422e-07	3.33165e-06	7.71406	7.71406
ENSG00000280219	-2.22646	9.69698e-06	7.98402e-05	3.81452	3.81452
SH3PXD2A-AS1	-5.08431	3.80594e-05	0.000245274	1.60892	1.60892
PAGR1	-1.0741	1.8592e-05	0.000136728	2.9654	2.9654
ENSG00000283413	-3.46179	1.39548e-06	1.673e-05	5.37595	5.37595
EEF1AKMT4	-1.3141	5.20629e-05	0.000316143	2.10897	2.10897
LINC00941	-4.07128	2.53495e-08	8.49044e-07	8.92749	8.92749
ENSG00000288736	-2.96067	7.05121e-05	0.000405993	1.88871	1.88871
ENSG00000289261	-1.43492	1.52629e-05	0.000115897	3.319	3.319
ENSG00000289609	-6.76273	3.56256e-10	4.80678e-08	13.4972	13.4972
ENSG00000289942	-3.00885	5.78146e-05	0.00034435	1.97936	1.97936
ENSG00000289985	-1.7639	1.08054e-05	8.68523e-05	3.70348	3.70348
ENSG00000290058	-1.76442	2.2572e-05	0.000159653	2.75778	2.75778
ENSG00000290729	-1.79416	2.00688e-06	2.22963e-05	5.26138	5.26138
ENSG00000290937	-1.607	0.000170643	0.000850071	0.974365	0.974365
FAM86B3P	-2.60694	2.58553e-06	2.73083e-05	5.08827	5.08827
FAM86JP	-1.76807	2.39308e-05	0.000167897	2.86336	2.86336
SBDSP1	-1.99341	3.55231e-05	0.00023155	2.45344	2.45344
FAM86DP	-1.855	4.34354e-08	1.23492e-06	9.0745	9.0745
ENSG00000291224	-3.10624	1.114e-07	2.42481e-06	8.14819	8.14819
RPSAP52	-4.03861	9.65494e-05	0.000527788	1.33047	1.33047
C19orf48P	-1.99388	6.47361e-08	1.63713e-06	8.58431	8.58431
ENSG00000293879	-5.78651	8.18199e-05	0.000458435	1.00871	1.00871
ENSG00000296183	-2.29526	8.78212e-07	1.17609e-05	6.13906	6.13906
ENSG00000296559	-2.5168	0.0004353	0.00184607	0.187862	0.187862
ENSG00000296964	-4.02126	0.000149336	0.000758775	0.374885	0.374885
ENSG00000302188	-4.61536	1.30856e-05	0.000101882	2.3932	2.3932
ENSG00000304140	-2.08665	9.54136e-05	0.000522559	1.63511	1.63511
ENSG00000304396	-5.06151	1.06318e-05	8.58415e-05	2.82578	2.82578
ENSG00000304732	-1.71418	0.000136902	0.000705891	1.20656	1.20656
ENSG00000305275	-5.01196	0.000110933	0.000594578	1.29292	1.29292
ENSG00000305512	-1.92624	2.22977e-07	4.02844e-06	7.4688	7.4688
ENSG00000306315	-3.44581	1.09326e-05	8.7664e-05	3.63917	3.63917
ENSG00000308072	-4.57918	0.000177429	0.000879494	0.654959	0.654959
ENSG00000308375	-5.47053	6.67052e-06	5.89562e-05	2.75164	2.75164
ENSG00000308762	-3.03596	3.50703e-05	0.000229057	2.58206	2.58206
ENSG00000309132	-3.77277	0.000182599	0.000901295	0.220441	0.220441
ENSG00000310496	-2.14606	3.96756e-07	6.37815e-06	6.80728	6.80728

## Sheet: HPAFII KRASsh vs GFPsh
gene_name	KvsC_H.logFC	KvsC_H.P.Value	KvsC_H.adj.P.Val	KvsC_H.B
FIRRM	-1.51503	1.0133e-09	1.05423e-08	12.237
HS3ST1	-2.96153	4.97116e-20	4.66295e-17	35.9632
CAMKK1	-1.54636	8.48449e-10	8.98458e-09	12.5139
REXO5	-1.2253	8.32932e-07	4.26321e-06	5.68533
TNFRSF12A	-1.56689	3.02019e-14	1.25468e-12	22.471
PHTF2	-1.49874	6.11906e-12	1.19708e-10	17.2033
ELAC2	-1.05976	1.21058e-11	2.16182e-10	16.3747
E2F2	-2.26841	8.8653e-13	2.2799e-11	19.3576
MGST1	-1.28807	4.09039e-13	1.17579e-11	19.8064
ST3GAL1	-1.18197	3.21026e-11	5.06761e-10	15.3937
NCAPD2	-1.5534	1.87713e-14	8.4909e-13	22.9854
ANLN	-2.09545	3.0096e-15	1.88066e-13	24.8713
BRCA1	-1.79373	3.27297e-13	9.57814e-12	20.2234
EXTL3	-1.68536	1.988e-17	3.78828e-15	29.9581
TACC3	-1.81472	4.25033e-17	6.65951e-15	29.2054
POLA2	-1.85366	2.67096e-11	4.30787e-10	15.95
SLC38A5	-2.48937	1.54431e-17	3.14579e-15	30.2403
SNAI2	-2.16174	4.16461e-09	3.69262e-08	11.0332
ZDHHC6	-1.26624	9.84476e-14	3.46746e-12	21.2814
DEPDC1	-2.94003	4.37769e-15	2.55801e-13	24.6222
RTEL1-TNFRSF6B	-1.66571	3.30368e-08	2.34201e-07	8.87228
FAS	-1.85345	5.52944e-07	2.93082e-06	6.27359
CENPQ	-1.06394	1.46372e-06	7.07908e-06	4.99234
ALG1	-1.17346	1.25625e-13	4.24836e-12	21.0546
SLC4A7	-1.55041	5.8439e-14	2.22543e-12	21.9131
VCL	-1.03771	7.85937e-11	1.12777e-09	14.3864
DEPDC1B	-1.40302	2.96766e-11	4.72229e-10	15.6761
SPDL1	-2.361	1.69896e-18	5.93703e-16	32.4202
TNC	-3.75961	6.64293e-09	5.59236e-08	10.5113
RAD51	-1.70804	2.50086e-10	3.08873e-09	13.7186
POLQ	-2.24528	7.57061e-14	2.7762e-12	21.7946
MRTO4	-1.19162	5.6125e-12	1.10893e-10	17.2286
RELT	-2.09415	1.23902e-13	4.2141e-12	21.3065
NOP58	-1.25134	2.65992e-13	8.02116e-12	20.2596
DCBLD2	-2.39566	4.40934e-20	4.40965e-17	36.0866
LAMC2	-1.8738	1.40456e-12	3.40853e-11	18.5435
NDC1	-1.60621	6.47417e-16	5.29278e-14	26.4263
ATP2C2	-1.46241	1.75157e-12	4.11285e-11	18.5856
IPO5	-1.08562	1.64537e-11	2.82776e-10	16.0762
MCM10	-3.11811	1.80912e-16	2.0278e-14	27.6805
ASPM	-2.39701	2.84961e-18	8.90977e-16	31.9291
PFKP	-1.2624	2.5267e-13	7.71078e-12	20.2984
PHKA1	-1.48271	8.30878e-14	3.00974e-12	21.6174
PKM	-1.38304	9.73398e-14	3.43523e-12	21.2117
NAV3	-2.36289	6.10846e-10	6.7618e-09	12.9076
PRR11	-2.56673	2.41643e-16	2.50382e-14	27.507
EIF2B3	-1.81886	5.73333e-10	6.40222e-09	12.8289
TCOF1	-1.95835	1.45032e-17	3.07709e-15	30.275
TRIP13	-1.50926	2.81755e-14	1.1871e-12	22.7022
TFRC	-1.56363	1.09968e-15	8.13213e-14	25.824
SMC1A	-1.4877	2.51433e-15	1.62357e-13	25.0387
HMMR	-2.83891	1.4e-16	1.65237e-14	28.039
TRHDE	-1.63421	1.90426e-13	6.06031e-12	20.6681
SCARB1	-1.21675	2.26999e-12	5.10204e-11	18.0689
MCM2	-1.38501	5.00395e-14	1.94717e-12	21.9965
GLI2	-3.54492	1.18214e-08	9.31394e-08	9.9116
ENO1	-1.47575	6.49284e-14	2.43611e-12	21.6351
MYDGF	-1.00639	1.00525e-09	1.04708e-08	11.8431
TIPIN	-2.19766	3.16516e-10	3.76565e-09	13.5523
NUP37	-1.21697	2.66359e-12	5.83893e-11	18.0234
SEMA3A	-1.08208	1.14005e-10	1.54981e-09	14.0454
GTSE1	-2.49458	1.51639e-16	1.74355e-14	27.9691
TIMM21	-1.45729	6.04219e-12	1.18586e-10	17.3527
FSCN1	-1.34021	1.97756e-14	8.81104e-13	22.9245
WDR62	-2.4742	9.47405e-17	1.21472e-14	28.421
MCM6	-2.22521	1.20288e-16	1.46833e-14	28.1654
PLXNA2	-1.65809	2.98742e-12	6.45355e-11	18.0269
SPAG5	-2.16591	7.39687e-14	2.74068e-12	21.7337
UBE2T	-1.95244	6.43992e-13	1.7285e-11	19.6222
TP73	-1.07713	6.98195e-06	2.92369e-05	3.44558
KIF22	-1.36586	1.72791e-14	7.9164e-13	23.098
RBL1	-1.17538	4.04705e-09	3.60093e-08	10.7026
NDC80	-1.69025	1.13487e-12	2.82877e-11	19.0342
GEMIN5	-1.36516	2.27035e-12	5.10204e-11	18.1588
P2RX5	-1.70621	1.74592e-09	1.71531e-08	11.7802
FAM234B	-1.85041	5.49268e-11	8.14398e-10	15.2524
CAD	-1.11885	1.27368e-12	3.11379e-11	18.6426
ORC1	-2.60948	4.56221e-14	1.79487e-12	22.2814
ATG16L1	-1.44968	3.86494e-15	2.30371e-13	24.6047
RAD54L	-1.2171	5.08161e-10	5.74647e-09	12.8629
LAT2	-2.44645	2.79439e-11	4.47857e-10	15.9169
PHACTR3	-2.22722	2.42067e-11	3.95429e-10	16.0557
AURKA	-2.14637	1.90875e-17	3.69759e-15	30.0157
TPX2	-2.59367	5.34603e-19	2.57505e-16	33.5912
SMOX	-1.01627	4.21375e-10	4.86068e-09	12.8251
BIRC5	-2.30338	5.70488e-17	8.3338e-15	28.9436
KIF4A	-2.1045	1.03525e-15	7.75217e-14	26.0472
ITGA6	-1.54427	2.08344e-14	9.16817e-13	22.8247
MAP3K20	-2.10644	5.28701e-15	2.9724e-13	24.4351
ORC6	-1.73133	2.3398e-10	2.91201e-09	13.7706
G2E3	-1.4324	9.74716e-10	1.0218e-08	11.9929
WDR76	-2.3154	2.41749e-11	3.9527e-10	16.075
CLSPN	-2.74338	1.60221e-14	7.39755e-13	23.3361
TGFB2	-1.31927	9.77634e-13	2.48906e-11	19.0323
CDC45	-2.57408	6.25819e-14	2.36728e-12	21.9819
CDC6	-1.55666	1.60781e-13	5.23845e-12	20.8488
NUP188	-1.29055	2.91309e-13	8.65283e-12	20.2022
CDC7	-1.5157	8.85018e-12	1.63958e-10	16.9753
NRP1	-1.60003	8.21059e-16	6.45802e-14	26.2126
RANBP1	-1.33914	5.2879e-13	1.4611e-11	19.6019
LGALS1	-3.03159	8.74698e-13	2.25529e-11	19.3421
CENPM	-1.91417	5.78182e-11	8.52304e-10	15.172
MCM5	-1.6464	3.04908e-15	1.88683e-13	24.8729
PRMT5	-1.3035	1.53274e-14	7.1697e-13	23.1675
POLE2	-2.53779	1.10927e-13	3.83871e-12	21.4162
CDKL1	-1.83085	3.72513e-13	1.08035e-11	20.195
CDKN3	-2.09965	2.67398e-12	5.8545e-11	18.1733
CNIH1	-1.25275	6.65891e-14	2.48795e-12	21.6859
CEP128	-1.55342	3.75276e-08	2.62487e-07	8.7479
MTHFD1	-1.01474	5.54773e-12	1.09857e-10	17.1109
VRK1	-1.65921	1.6548e-13	5.34272e-12	20.9183
PROCR	-1.90011	2.79262e-17	4.87943e-15	29.5966
MYBL2	-1.72744	3.23535e-13	9.51493e-12	20.1195
SLCO4A1	-1.25915	8.47543e-12	1.57836e-10	16.6999
NTSR1	-3.59641	3.42581e-22	1.52637e-18	40.8235
FERMT1	-1.55204	3.63977e-17	5.98658e-15	29.3063
POFUT1	-1.13264	1.26406e-13	4.26668e-12	21.0113
NOP56	-1.55616	4.21847e-17	6.65951e-15	29.1597
JAG1	-1.14002	2.84691e-13	8.49878e-12	20.1631
E2F1	-1.98812	1.33948e-14	6.41728e-13	23.4397
FAM83D	-1.42403	2.81828e-13	8.4274e-12	20.3055
CSTF2	-1.15829	1.48241e-11	2.58004e-10	16.2171
VSIG1	-4.26185	1.0719e-08	8.52068e-08	9.59902
POLA1	-1.10475	1.56628e-09	1.56208e-08	11.604
SUV39H1	-1.26339	1.95169e-09	1.88408e-08	11.4976
CENPI	-1.75105	1.83e-11	3.10908e-10	16.2825
GLA	-1.60331	7.61096e-14	2.78527e-12	21.6108
CORO1A	-1.88194	6.45377e-08	4.28696e-07	8.33223
GDPD3	-1.25611	3.7433e-06	1.65912e-05	4.15313
DHODH	-1.11795	1.61098e-08	1.22749e-07	9.39237
HAS3	-3.54905	1.2553e-15	8.98471e-14	25.7381
COTL1	-1.06065	7.67448e-10	8.23944e-09	12.0826
ABCC1	-1.45201	3.51089e-14	1.42207e-12	22.3219
SLC7A5	-2.07369	2.62421e-17	4.67687e-15	29.6792
OIP5	-1.52042	1.07275e-07	6.70824e-07	7.71755
POP1	-1.75781	2.87156e-13	8.54372e-12	20.3681
TNFRSF10A	-1.40426	1.40966e-12	3.41345e-11	18.7402
MCM4	-2.15106	5.13366e-17	7.75357e-15	28.9849
KCNN4	-1.64047	6.7205e-15	3.64952e-13	24.0706
AMH	-1.61069	6.77994e-07	3.5331e-06	5.93807
ASF1B	-1.26155	6.30559e-10	6.91558e-09	12.4984
CCNE1	-1.13127	3.02079e-06	1.36054e-05	4.32633
GPI	-1.08829	6.87266e-12	1.32273e-10	16.894
SLC1A5	-1.19556	1.34047e-13	4.48216e-12	20.9231
LIG1	-1.19801	1.14961e-11	2.06535e-10	16.5201
TNPO2	-1.05736	9.69574e-13	2.47207e-11	18.9409
CAV2	-1.2615	1.2677e-11	2.24805e-10	16.4143
CAV1	-2.14757	7.10456e-15	3.81378e-13	24.0842
FKBP14	-1.25272	2.40419e-11	3.93457e-10	15.8631
EPHB6	-1.53817	3.78061e-11	5.85895e-10	15.4725
IMPDH1	-2.72037	7.79632e-18	1.98494e-15	30.8993
EZH2	-1.28769	3.2708e-13	9.57814e-12	20.1532
PALD1	-1.87253	1.1847e-13	4.04478e-12	21.3255
TWNK	-1.09656	4.4998e-10	5.16058e-09	12.7888
NPM3	-1.11549	2.40075e-10	2.97539e-09	13.4263
BCCIP	-1.03585	9.79509e-10	1.02566e-08	11.8869
DKK1	-3.88826	9.41274e-16	7.14577e-14	26.1055
TASOR2	-1.05383	6.25374e-13	1.6887e-11	19.4006
TFAM	-1.01032	5.74853e-11	8.48098e-10	14.8276
UBE2S	-1.98931	2.64528e-14	1.12516e-12	22.7756
PPIF	-1.23606	2.93617e-11	4.67635e-10	15.5124
RAD51C	-1.28352	2.13334e-06	9.91924e-06	4.72232
C1QBP	-1.08247	1.45808e-12	3.50215e-11	18.5103
TMEM33	-1.12315	9.11818e-14	3.2566e-12	21.3617
AREG	-1.15796	5.85772e-09	5.00702e-08	9.98942
ANXA10	-2.51415	2.5624e-14	1.09514e-12	22.7162
GRPEL1	-1.16059	3.44388e-10	4.05105e-09	13.0673
NEIL3	-2.80601	3.04932e-09	2.80418e-08	11.3382
NSD2	-1.06752	8.34138e-13	2.16706e-11	19.1307
NCAPG	-3.03585	3.66196e-17	5.98658e-15	29.3514
TMEM109	-2.13208	8.22562e-16	6.45802e-14	26.2361
NECTIN1	-2.59424	7.85576e-21	1.09375e-17	37.7662
KIAA1549L	-3.40858	8.34137e-12	1.55665e-10	17.083
SLC35F2	-1.38866	1.96344e-15	1.30569e-13	25.2794
CAPRIN2	-1.7819	3.07476e-11	4.87097e-10	15.4833
FOXM1	-1.77009	1.28783e-13	4.32236e-12	21.1229
NAA25	-1.20051	1.60056e-13	5.23398e-12	20.8448
DDX55	-1.13475	7.76083e-12	1.47208e-10	16.9028
SLC38A1	-1.2556	5.22422e-15	2.95575e-13	24.2347
RFC5	-1.41419	1.87087e-12	4.34149e-11	18.4412
TBC1D30	-1.08112	1.42708e-05	5.51222e-05	2.86772
TIMELESS	-1.2854	6.67239e-13	1.78017e-11	19.3347
NOP2	-1.52434	6.98457e-07	3.63298e-06	5.91782
CDCA3	-3.35197	2.86483e-16	2.8365e-14	27.1985
NT5DC3	-1.12593	5.0079e-08	3.41695e-07	8.35561
DDX12B	-2.29517	1.33505e-07	8.18764e-07	7.66325
PAK1IP1	-1.13331	3.51678e-11	5.48347e-10	15.4717
FBXO5	-1.36367	4.59788e-10	5.26967e-09	12.9761
MCM3	-1.17759	9.25437e-13	2.36291e-11	19.0156
MDGA1	-2.82932	1.10685e-10	1.51391e-09	14.5912
BAG2	-1.3627	1.59359e-09	1.58529e-08	11.6102
GMNN	-1.71702	2.73724e-12	5.96233e-11	18.194
MDFI	-2.5263	1.31274e-15	9.24728e-14	25.8109
TTK	-2.09372	1.34451e-13	4.48725e-12	21.1687
SLC29A1	-3.0692	1.1216e-18	4.543e-16	32.8302
LAMA4	-1.10137	4.28122e-08	2.95736e-07	8.14003
KIF20A	-2.25029	4.8136e-17	7.39552e-15	29.1035
FAF2	-1.06704	7.63852e-13	2.01381e-11	19.1764
POLR3G	-2.56837	1.89121e-14	8.53248e-13	23.1725
LMNB1	-2.15142	3.10287e-16	3.00545e-14	27.1916
BRIX1	-1.1878	3.1308e-12	6.65837e-11	17.8328
NUP155	-1.26707	5.42974e-14	2.09004e-12	21.9316
TCERG1	-1.09328	4.81047e-12	9.69821e-11	17.3221
SMC4	-1.55891	1.86142e-15	1.25186e-13	25.3428
ECT2	-1.46543	4.2568e-13	1.21773e-11	19.7723
C3orf52	-1.1204	9.67962e-09	7.77423e-08	9.84753
RRP9	-1.12775	9.13862e-11	1.27941e-09	14.4249
SLC4A3	-1.69959	1.60753e-06	7.71597e-06	5.16035
NCL	-1.34999	1.31974e-14	6.33971e-13	23.2751
CENPA	-2.09018	1.70253e-10	2.20833e-09	14.1634
AUP1	-1.00523	3.53762e-11	5.51114e-10	15.2322
CCDC88A	-2.38536	1.78041e-13	5.69666e-12	20.9345
EVA1A	-1.65951	2.25078e-05	8.29482e-05	2.73625
EHBP1	-1.17753	1.69919e-13	5.46626e-12	20.7345
HPCAL1	-1.16255	1.26452e-11	2.24464e-10	16.4091
ODC1	-1.59878	1.08484e-14	5.39677e-13	23.5568
EPHA4	-1.86322	9.80073e-07	4.93136e-06	5.71469
FARSB	-1.38539	2.83694e-11	4.53859e-10	15.5313
DHCR24	-1.2538	3.90635e-10	4.5384e-09	12.7434
ICMT	-1.16511	1.92271e-12	4.44442e-11	18.246
ERRFI1	-2.28084	7.56966e-17	1.02202e-14	28.5948
SRM	-1.33152	2.63257e-12	5.78516e-11	17.9816
TTF2	-1.16216	7.0358e-12	1.3473e-10	17.0536
SLC2A1	-2.08651	3.43778e-17	5.83506e-15	29.4009
CDC20	-2.46771	8.47676e-19	3.6847e-16	33.1382
F3	-1.95827	1.7581e-15	1.19136e-13	25.3577
DARS2	-1.09546	4.93501e-11	7.40959e-10	14.9577
NEK2	-1.84452	6.70395e-12	1.29445e-10	17.2935
CENPF	-2.6282	1.75947e-19	1.30656e-16	34.7002
POLR1G	-1.89422	2.08054e-15	1.37842e-13	25.3486
KIF14	-2.46075	6.36855e-15	3.47096e-13	24.2529
NRP2	-1.65996	8.32655e-17	1.08968e-14	28.4878
MYB	-1.36716	1.09638e-06	5.45952e-06	5.40712
DCLRE1B	-1.02643	3.99788e-07	2.19231e-06	6.19889
CTNNAL1	-1.11917	4.61655e-13	1.3039e-11	19.7106
NEK6	-1.54726	1.62166e-08	1.23352e-07	9.62861
ATL2	-1.03247	4.52069e-12	9.16583e-11	17.4428
GPAM	-1.41355	8.70964e-12	1.6186e-10	16.8594
HELLS	-1.55993	7.7804e-12	1.47208e-10	17.0166
MTHFD1L	-1.27571	3.37525e-12	7.11037e-11	17.7769
ARAP3	-2.20534	5.05756e-12	1.01298e-10	17.6278
CCDC77	-1.14792	9.42365e-09	7.59603e-08	9.95854
EXOSC8	-1.15334	2.70851e-11	4.36448e-10	15.7081
EGR1	-3.74101	1.17204e-15	8.56069e-14	25.9209
UTP20	-1.05542	9.63635e-11	1.34066e-09	14.311
DUSP4	-1.80881	5.57105e-15	3.08346e-13	24.318
UBIAD1	-1.02267	1.83884e-10	2.36448e-09	13.7116
NCAPH	-2.61575	1.50818e-16	1.74355e-14	27.9734
LRAT	-2.99105	5.53044e-07	2.93082e-06	6.23548
ADCY7	-2.41189	3.14118e-13	9.26856e-12	20.3419
KIF18A	-1.01186	1.90404e-08	1.42639e-07	9.05532
MRPS2	-1.05265	7.88536e-11	1.12982e-09	14.5007
SHLD2	-1.17755	1.97193e-11	3.30299e-10	16.0936
CCDC18	-1.21419	2.02559e-08	1.50857e-07	9.25936
HNRNPA2B1	-1.02556	6.58273e-13	1.76152e-11	19.259
PLAU	-1.53093	1.07506e-10	1.47723e-09	14.1846
ZWINT	-1.47488	1.97033e-13	6.23715e-12	20.6891
CIT	-1.6745	2.87059e-14	1.20093e-12	22.6392
PRDX4	-1.52437	2.76967e-12	6.0123e-11	17.9224
ADGRE5	-1.56664	2.62115e-15	1.67434e-13	25.032
CENPK	-1.35338	7.29525e-09	6.07267e-08	10.1025
CDK2	-1.37002	4.96531e-14	1.94487e-12	22.0751
TUBA1B	-2.04753	5.20768e-15	2.95575e-13	24.2337
HJURP	-2.32777	1.3372e-17	2.90628e-15	30.3886
NDUFAF4	-1.01328	3.82684e-07	2.10962e-06	6.19436
EXOSC9	-1.48388	5.92519e-13	1.60974e-11	19.6531
ACSL3	-1.16614	2.73816e-12	5.96233e-11	17.9055
CHPF	-1.5202	1.08711e-14	5.39677e-13	23.4893
TOX2	-1.5982	1.06044e-10	1.46165e-09	14.583
CSE1L	-1.26182	2.0664e-13	6.50661e-12	20.4917
SNAI1	-1.73629	5.88918e-05	0.00019725	1.81341
EREG	-2.39136	5.48084e-18	1.55047e-15	31.2455
AHNAK	-1.15746	9.56913e-12	1.75997e-10	16.5142
ABCC4	-1.69666	4.26148e-07	2.32115e-06	6.5191
EFNB2	-1.65298	6.88655e-16	5.55349e-14	26.4199
SOX21	-2.54653	1.69315e-05	6.42364e-05	3.04014
HROB	-1.75887	8.51258e-09	6.93695e-08	10.2684
SLC25A19	-1.63655	6.74349e-11	9.8591e-10	14.9701
POLR1B	-1.03804	2.39503e-11	3.92318e-10	15.7045
TNFSF9	-1.95716	1.76838e-09	1.73356e-08	11.8021
FOXA2	-1.50842	7.84105e-10	8.38795e-09	12.4789
SNRPB	-1.01699	5.49413e-12	1.08917e-10	17.1052
MCM8	-1.10999	7.48223e-09	6.1936e-08	10.1159
NCLN	-1.62742	2.22124e-16	2.34242e-14	27.4949
GRPR	-2.62087	3.10292e-16	3.00545e-14	27.2571
XRCC3	-1.80297	3.04815e-14	1.26042e-12	22.6338
BCL2L12	-1.86317	1.05602e-14	5.27184e-13	23.7288
DLGAP5	-2.61124	8.02982e-18	2.0156e-15	30.897
IPPK	-1.0116	3.67933e-08	2.5806e-07	8.47747
EMC1	-1.11923	2.28226e-11	3.76001e-10	15.723
PKMYT1	-2.81464	3.66656e-19	2.04252e-16	33.9079
CHTF18	-1.44883	2.06613e-14	9.1371e-13	22.9505
TUBA4A	-1.67257	7.83057e-15	4.11671e-13	23.8792
PAICS	-1.31691	8.52965e-13	2.20632e-11	19.0583
PPAT	-1.26581	3.33242e-11	5.2465e-10	15.4933
SDF2L1	-1.2937	1.7339e-08	1.31272e-07	9.1905
STRIP2	-2.12596	1.5947e-15	1.10158e-13	25.6221
KNSTRN	-1.73558	9.05643e-14	3.24104e-12	21.5634
E2F8	-2.08466	2.96474e-08	2.11654e-07	9.04041
PIMREG	-1.54032	1.21744e-07	7.53899e-07	7.54219
KRI1	-1.13731	6.62517e-13	1.77022e-11	19.3893
SGO1	-1.90958	1.56793e-11	2.7051e-10	16.4983
LDLR	-2.07895	4.56982e-13	1.29275e-11	19.694
TOMM40	-1.22803	3.71867e-12	7.72425e-11	17.5855
ATP8B3	-3.27407	2.49594e-08	1.81636e-07	9.12459
COLGALT1	-1.07864	9.31148e-12	1.71823e-10	16.5995
CEP85	-1.66225	2.68816e-10	3.2814e-09	13.6567
EXOSC2	-1.11683	1.56554e-11	2.7036e-10	16.2015
DNMT1	-1.66344	2.46144e-16	2.52114e-14	27.3989
NOL11	-1.04207	1.68074e-10	2.18484e-09	13.732
SYNE1	-2.53599	6.83471e-11	9.98427e-10	15.0504
ULBP3	-1.68974	4.26785e-09	3.76916e-08	10.8793
GINS2	-2.25593	2.27758e-12	5.1058e-11	18.4232
PRR7	-1.09291	7.73059e-08	5.02739e-07	7.76711
PSMC3IP	-1.75494	5.7112e-10	6.38151e-09	12.9514
TNS4	-1.66209	1.03154e-12	2.61138e-11	18.9856
TOP2A	-2.1245	6.37368e-16	5.25888e-14	26.4377
NUP210	-1.33884	1.48784e-13	4.91952e-12	20.8868
SCLY	-1.04891	1.85705e-07	1.10028e-06	7.07339
FIGNL1	-1.32042	4.72294e-12	9.53253e-11	17.4754
EIF5A	-1.02567	2.6013e-09	2.43873e-08	10.7591
PCNA	-1.58293	1.49346e-14	7.02279e-13	23.1992
LGR6	-1.7601	2.68066e-12	5.86194e-11	18.0551
DCLK1	-2.99042	7.81036e-05	0.000254147	1.51749
RFC3	-2.0982	2.4663e-11	4.02145e-10	15.8999
CCNB1	-2.46377	4.25981e-17	6.65951e-15	29.2093
PSRC1	-2.58563	8.88582e-16	6.81221e-14	26.1814
NOTCH2	-1.31225	7.57631e-12	1.4395e-10	16.9041
LDHA	-1.36604	2.7313e-12	5.96233e-11	17.8058
EMP1	-1.56204	4.13719e-15	2.4496e-13	24.5569
DDB2	-1.46474	2.98278e-11	4.74212e-10	15.7498
YARS1	-1.3182	5.46429e-13	1.50285e-11	19.5415
CDCA8	-2.18069	1.15802e-16	1.44324e-14	28.2345
SLC37A2	-4.4134	3.66742e-19	2.04252e-16	33.5658
WDR36	-1.07163	7.5382e-12	1.43379e-10	16.854
CTSL	-1.71732	8.21305e-12	1.53701e-10	16.9264
PSAT1	-1.44352	3.0322e-12	6.52655e-11	17.9366
ADAM19	-4.59448	8.68818e-25	1.54841e-20	46.2283
RNFT2	-1.57482	1.15221e-06	5.69775e-06	5.45288
NT5E	-1.48821	2.77509e-12	6.01675e-11	17.8188
TROAP	-2.3289	1.53691e-18	5.58996e-16	32.5281
B4GALNT1	-2.38932	4.68655e-06	2.03171e-05	4.22807
ESPL1	-2.71108	1.41677e-19	1.20236e-16	34.887
CPM	-1.12414	2.44666e-09	2.30711e-08	11.1085
MPHOSPH6	-1.41995	7.7541e-08	5.03948e-07	7.95745
URB2	-1.28944	5.30522e-12	1.05642e-10	17.4003
SCEL	-3.2237	9.42237e-16	7.14577e-14	26.1531
BRIP1	-1.35693	9.53844e-09	7.67468e-08	9.92142
TRA2B	-1.25803	2.08211e-13	6.53509e-12	20.5139
GALNT5	-3.19809	6.4466e-18	1.71479e-15	31.1091
ODF2	-1.339	7.87553e-13	2.07017e-11	19.2789
SMC2	-1.14935	6.16455e-11	9.05726e-10	14.7751
SLC31A2	-1.70884	8.22624e-08	5.30996e-07	8.04738
DSCC1	-2.43878	2.8619e-13	8.52924e-12	20.4602
MYC	-1.26607	9.28593e-14	3.30988e-12	21.299
POLR1E	-1.26525	2.01975e-11	3.37674e-10	16.0523
ARHGEF39	-1.82224	3.22271e-14	1.31732e-12	22.6259
TINAG	-2.63649	1.52055e-12	3.6326e-11	18.8021
HMGA1	-2.1839	8.59194e-21	1.09375e-17	37.719
TCF19	-1.6876	2.34939e-11	3.86262e-10	15.9773
IER3	-1.78215	2.0182e-14	8.94737e-13	22.9157
NRM	-1.66929	8.75693e-13	2.25529e-11	19.3048
KIF23	-2.84956	3.99188e-18	1.20582e-15	31.5865
KNL1	-2.49346	1.51245e-15	1.05293e-13	25.6746
PAQR5	-1.85251	1.50737e-10	1.98176e-09	13.9918
TUBGCP4	-1.31324	2.74463e-12	5.96522e-11	18.0702
ARHGAP29	-1.01221	2.01984e-10	2.56575e-09	13.5378
SELENOI	-1.23445	1.44743e-13	4.79483e-12	20.9023
ADCY3	-1.20732	4.48337e-13	1.27218e-11	19.7777
PNPT1	-1.23055	2.97749e-13	8.82941e-12	20.208
SLC5A6	-1.39445	2.38511e-14	1.02924e-12	22.7701
CENPO	-1.39797	2.19316e-12	4.97284e-11	18.3013
MFSD13A	-1.119	5.85313e-07	3.08881e-06	5.89732
KIF11	-2.16019	2.99117e-15	1.87706e-13	24.9562
CEP55	-2.50481	6.13549e-16	5.13365e-14	26.5684
KIF20B	-1.72481	2.47027e-13	7.59055e-12	20.4695
ADAMTS14	-1.67993	7.65732e-07	3.95218e-06	5.91417
DNA2	-2.41166	5.44251e-13	1.49917e-11	19.8338
WDR12	-1.02268	7.93789e-12	1.49387e-10	16.8313
MNS1	-2.67744	4.254e-06	1.86262e-05	4.3326
SEMA7A	-2.83993	2.92962e-07	1.66015e-06	6.85195
ZGRF1	-1.94814	1.09697e-09	1.13532e-08	12.2953
GPAT3	-3.21695	1.30931e-18	5.07273e-16	32.6943
BMPR1B	-1.31974	8.98284e-07	4.56754e-06	5.67103
CENPE	-2.47754	1.22789e-16	1.48867e-14	28.1808
ALG10	-1.32589	8.90616e-08	5.69521e-07	7.74508
LRIG3	-1.28197	1.35679e-07	8.30384e-07	7.46812
PHLDA1	-2.55625	1.51699e-21	3.37948e-18	39.4291
DUSP6	-2.09015	1.05353e-15	7.82335e-14	25.9235
SNRPF	-1.03658	1.97749e-09	1.90605e-08	11.2272
GAS2L3	-1.30403	5.02648e-08	3.42569e-07	8.2586
SLC7A1	-1.5302	2.35979e-15	1.52932e-13	25.1098
BRCA2	-2.13245	7.46117e-14	2.75278e-12	21.8064
ITGB7	-2.66888	1.81918e-09	1.77554e-08	11.816
ESYT1	-1.24338	1.86456e-12	4.33248e-11	18.233
DIAPH3	-2.55406	3.88868e-10	4.52376e-09	13.3559
PIF1	-2.4868	2.16887e-14	9.52059e-13	23.0051
FANCI	-2.0352	4.19431e-15	2.4752e-13	24.5994
TICRR	-2.34748	9.58685e-14	3.39002e-12	21.5615
WRAP53	-1.3477	1.70749e-11	2.91205e-10	16.265
DUS3L	-1.10903	4.04761e-11	6.23035e-10	15.31
URB1	-1.128	6.34597e-13	1.70843e-11	19.4312
EMP3	-1.80079	8.91073e-06	3.62325e-05	3.60876
PADI1	-2.01709	1.3754e-05	5.3311e-05	3.20879
EPHA2	-2.07876	1.37935e-17	2.96179e-15	30.3011
PLK4	-1.94578	5.52961e-14	2.12389e-12	22.0999
KIF2C	-2.46388	1.10345e-17	2.4582e-15	30.5728
ITGA10	-2.23829	1.29436e-05	5.0378e-05	3.29585
NUF2	-2.16569	1.31659e-12	3.20987e-11	18.9617
RGS16	-1.83605	9.55551e-05	0.00030446	1.42005
ANP32E	-1.84804	2.14097e-12	4.87934e-11	18.2221
DTL	-2.63708	5.33522e-13	1.47189e-11	19.8329
TAF1A	-1.0061	2.60178e-06	1.18712e-05	4.43096
CEP170	-1.46728	1.84471e-11	3.13108e-10	16.1817
LBR	-1.76826	1.42257e-14	6.76698e-13	23.2488
CHAC2	-1.49656	2.45874e-08	1.79736e-07	9.16708
TEX261	-1.69966	3.15372e-14	1.29506e-12	22.5498
SLC20A1	-1.6574	9.16354e-15	4.70642e-13	23.7252
POLR2D	-1.09553	3.78312e-10	4.41647e-09	12.9332
CDCA7	-2.121	5.12013e-15	2.91536e-13	24.4679
HSPD1	-1.05531	2.50073e-12	5.50903e-11	17.8938
CCDC150	-1.7018	2.8552e-07	1.62225e-06	6.76389
FANCD2	-1.88897	1.97493e-14	8.81104e-13	23.0671
POMGNT2	-1.14083	1.70878e-10	2.21483e-09	13.9291
MYH15	-5.85919	5.52188e-13	1.51635e-11	19.0883
NCEH1	-1.32542	7.37535e-15	3.91201e-13	23.9093
MANF	-1.07962	3.13888e-09	2.8732e-08	10.7865
TM4SF19	-4.25328	1.44891e-06	7.01506e-06	4.99329
LYAR	-2.03462	2.133e-13	6.65492e-12	20.7122
AFG2A	-1.68955	7.27948e-12	1.38687e-10	17.2286
CCNA2	-2.39024	1.01001e-14	5.08488e-13	23.7656
NAF1	-1.13597	1.62536e-09	1.60929e-08	11.6802
SKP2	-1.33202	2.36504e-10	2.94137e-09	13.5642
PLK2	-1.33656	7.85253e-09	6.47307e-08	9.9674
DOK3	-1.91393	4.97807e-09	4.33199e-08	10.8324
PRIM2	-1.00988	6.30843e-08	4.19981e-07	7.96345
MMS22L	-1.06999	6.98669e-10	7.57402e-09	12.4821
SLC18B1	-1.96178	3.77221e-16	3.50147e-14	27.0587
MTFR2	-1.67123	3.70555e-09	3.31861e-08	11.0642
EGFR	-1.66796	1.54497e-14	7.18917e-13	23.1172
CDCA5	-2.24448	3.52653e-17	5.92922e-15	29.4214
TMEM209	-1.35529	3.95253e-12	8.18141e-11	17.5697
NCAPG2	-2.21974	3.69501e-17	5.98658e-15	29.3705
PRPS1	-2.06801	2.19726e-16	2.33092e-14	27.5964
GINS4	-1.78104	1.24522e-11	2.21481e-10	16.6772
SIGMAR1	-1.39018	4.85899e-14	1.90742e-12	21.9796
CEP78	-1.17158	2.44232e-09	2.30424e-08	11.285
NOTCH1	-1.32881	6.09264e-10	6.74848e-09	12.5541
MKI67	-2.76421	1.75673e-19	1.30656e-16	34.7042
TAF5	-1.8881	2.68743e-07	1.53658e-06	6.87464
PPRC1	-1.20622	1.11829e-12	2.79526e-11	18.835
ITPRIP	-3.09071	1.59017e-12	3.77866e-11	18.6532
PDCD11	-1.01369	9.40813e-12	1.73215e-10	16.6116
ZNF215	-1.29536	3.03055e-09	2.79124e-08	11.1228
GLB1L2	-1.14002	2.22579e-11	3.67978e-10	15.8128
TMEM138	-1.04642	7.40211e-11	1.06732e-09	14.617
INCENP	-1.5103	3.31544e-12	7.00007e-11	17.7661
CCDC15	-1.22248	7.58447e-05	0.000247837	1.36203
CHEK1	-1.24856	8.09556e-11	1.15516e-09	14.5035
DSN1	-1.10056	7.18056e-11	1.03958e-09	14.678
HIRIP3	-1.04631	6.51058e-10	7.11414e-09	12.5504
HMGA2	-1.26325	4.56919e-11	6.94221e-10	14.9746
ITGB1	-1.66077	1.11323e-15	8.19834e-14	25.8056
VEGFC	-3.00974	7.02962e-05	0.000230885	1.70173
PRSS53	-1.63495	1.82936e-06	8.66868e-06	5.07703
NOCT	-2.44244	4.73873e-09	4.13989e-08	10.9013
ABTB3	-1.3888	2.87044e-12	6.21592e-11	18.0495
GXYLT1	-1.37622	3.04251e-12	6.53297e-11	17.8912
TEX30	-1.51483	6.019e-07	3.16433e-06	6.10913
NCAPD3	-1.22746	4.47174e-13	1.27106e-11	19.7812
CENPU	-1.61472	8.97618e-11	1.25963e-09	14.6473
SACS	-1.74303	2.5599e-11	4.15885e-10	15.8685
SPC25	-2.02365	2.32732e-10	2.89849e-09	13.8127
HOMER1	-1.82819	5.13789e-11	7.66897e-10	15.3081
ANKRD22	-2.55877	1.36752e-18	5.16789e-16	32.6515
PRDM8	-1.53222	3.59227e-10	4.20364e-09	13.268
CENPH	-1.31363	4.47389e-09	3.93941e-08	10.767
LPCAT1	-1.51186	1.1828e-12	2.91966e-11	18.8081
CMTM7	-1.38766	1.11091e-12	2.78072e-11	18.9266
UBASH3B	-3.01526	8.37652e-17	1.08968e-14	28.4755
SKA1	-2.49012	1.71038e-10	2.21529e-09	14.1636
EME1	-2.3352	1.95021e-12	4.49633e-11	18.5621
KLF10	-1.02471	2.77531e-05	0.000100125	1.6795
AGPAT5	-1.36489	7.52008e-15	3.97694e-13	23.922
NUP205	-1.53293	1.83711e-15	1.24019e-13	25.3582
CCT8	-1.20529	2.32218e-12	5.1927e-11	18.0273
PTDSS1	-1.2767	2.19285e-14	9.6022e-13	22.8444
PABIR2	-1.28573	3.24278e-12	6.86375e-11	17.6961
TBC1D31	-1.04831	1.59895e-07	9.64022e-07	7.11844
ATAD2	-1.71749	3.5828e-14	1.44791e-12	22.3627
FRRS1	-2.67103	6.61939e-17	9.43767e-15	28.7961
SASS6	-1.41307	1.11889e-10	1.5292e-09	14.4379
BUB1B	-2.18637	2.16299e-17	4.01549e-15	29.9096
NRG1	-4.36517	4.94282e-05	0.000168498	1.72087
LRP8	-4.55894	2.68092e-19	1.6861e-16	34.0091
CCNB2	-2.26442	2.02289e-16	2.17181e-14	27.6814
DUSP2	-2.33487	1.47829e-11	2.57538e-10	16.5571
CDC25C	-1.87301	1.12318e-10	1.53389e-09	14.5088
SLC45A3	-1.09516	9.70085e-09	7.78777e-08	9.87279
GART	-1.28194	9.69082e-15	4.93456e-13	23.632
RUNX1	-1.37132	1.98483e-13	6.27191e-12	20.6568
CHAF1B	-1.77047	1.65416e-11	2.84011e-10	16.3725
WDR4	-1.22401	2.51704e-10	3.10441e-09	13.5284
C21orf58	-1.80302	8.08719e-09	6.63887e-08	10.1641
TONSL	-1.12828	5.62214e-13	1.53442e-11	19.5755
RECQL4	-2.09267	1.51863e-17	3.14579e-15	30.257
MPP3	-1.96161	8.51971e-11	1.20794e-09	14.8239
DBF4B	-1.37832	4.04396e-10	4.68301e-09	13.1612
RACGAP1	-1.79223	6.5773e-17	9.43767e-15	28.7564
SPC24	-1.34884	2.19475e-08	1.621e-07	9.21741
SNRNP25	-1.08388	5.17153e-08	3.51649e-07	8.19021
WDR90	-1.14985	6.17843e-12	1.20605e-10	17.1099
CCNF	-2.22496	2.10973e-15	1.38744e-13	25.3463
PAQR4	-1.12289	6.09474e-12	1.19363e-10	17.0954
CLPB	-1.2792	3.07911e-12	6.57985e-11	17.8663
NEU3	-1.15421	3.97672e-10	4.61413e-09	13.0255
CCDC138	-1.44728	1.55327e-10	2.03547e-09	14.1188
BOLA3	-1.46348	6.38067e-07	3.34459e-06	5.93871
ANTXR2	-1.41733	1.60078e-12	3.79883e-11	18.4604
POGLUT1	-1.03758	1.40542e-10	1.86364e-09	14.0229
CIP2A	-3.06516	1.51074e-15	1.05293e-13	25.6232
SGO2	-1.90262	2.18648e-12	4.96401e-11	18.3897
SERPINI1	-1.75833	1.83589e-08	1.38348e-07	9.5549
TM4SF18	-2.87891	4.38779e-16	3.97673e-14	26.8972
KIF15	-2.84432	9.38149e-15	4.80451e-13	23.8433
WDR43	-1.16514	5.26962e-13	1.45831e-11	19.5958
TMEM41A	-1.03441	8.944e-12	1.65524e-10	16.7107
RFC4	-1.67723	1.86965e-15	1.25266e-13	25.4202
RFT1	-1.10641	4.61126e-10	5.28161e-09	12.8461
H2AZ1	-1.16253	4.10394e-12	8.44577e-11	17.4722
CDC25A	-2.65619	1.42267e-12	3.43561e-11	18.8674
ATRIP	-1.49066	4.86609e-08	3.33039e-07	8.44564
MON1A	-1.39142	1.22331e-09	1.25442e-08	12.0387
MST1R	-1.24214	8.46182e-13	2.19196e-11	19.0651
DUSP7	-1.26178	1.92457e-10	2.45699e-09	13.6859
HMGB2	-1.96315	4.67217e-15	2.67722e-13	24.4437
MAD2L1	-2.07812	7.19914e-13	1.90927e-11	19.4906
ABCE1	-1.21439	3.44287e-11	5.39182e-10	15.3019
ITGA2	-1.87204	1.72891e-12	4.07036e-11	18.3074
ARSK	-1.47157	4.87985e-07	2.61796e-06	6.1184
TERT	-2.08442	0.000230374	0.000672078	0.588373
FOXQ1	-1.78234	4.22833e-15	2.48704e-13	24.6131
DCBLD1	-1.28335	8.74121e-10	9.24545e-09	12.1937
STK17A	-1.38421	5.41034e-12	1.07375e-10	17.3803
PTTG1	-2.38697	1.04199e-14	5.21638e-13	23.7387
STEAP1	-2.25986	9.3755e-18	2.16413e-15	30.7271
FABP5	-1.94964	2.10518e-06	9.81038e-06	4.92328
DLC1	-1.39893	5.02114e-08	3.42337e-07	8.37076
CSMD3	-4.44844	3.17872e-09	2.90221e-08	10.8516
LETM2	-3.29445	2.71835e-14	1.15349e-12	22.6611
ZNF367	-1.7458	1.7666e-10	2.27982e-09	13.9551
NOL6	-1.18354	4.32646e-12	8.82222e-11	17.4359
AQP3	-1.08979	1.23194e-10	1.65953e-09	13.9247
MELK	-1.91061	2.30451e-16	2.4073e-14	27.5415
CLDN2	-1.97431	2.63348e-10	3.2257e-09	13.7257
SKA3	-2.58359	2.76652e-13	8.31008e-12	20.5102
DDIAS	-2.53251	1.6452e-13	5.34034e-12	21.0177
LRR1	-1.20515	4.10522e-09	3.64722e-08	10.6965
QSOX2	-1.21184	2.6063e-13	7.91303e-12	20.329
ZMYND19	-1.14359	3.31444e-10	3.92491e-09	13.1224
DDX21	-1.07607	4.37925e-12	8.89171e-11	17.3636
METTL3	-1.50073	6.13484e-15	3.35384e-13	24.1658
E2F7	-2.1296	4.95565e-12	9.96836e-11	17.6391
NOLC1	-1.32071	1.39103e-13	4.62518e-12	20.9037
CCT2	-1.0277	1.03328e-12	2.61208e-11	18.8322
MCM7	-1.65728	1.11756e-17	2.45891e-15	30.5066
HSP90B1	-1.07892	1.40572e-12	3.40853e-11	18.4849
MMP10	-6.58637	2.8051e-10	3.39984e-09	11.1641
SAAL1	-1.034	4.06494e-08	2.82218e-07	8.39175
NAV2	-4.16814	6.81937e-08	4.50964e-07	7.82943
C18orf54	-1.92117	4.83718e-09	4.21762e-08	10.8687
PLK1	-2.6989	1.86646e-18	6.39694e-16	32.3511
NEMP1	-1.85329	7.183e-15	3.83396e-13	24.067
SLC27A4	-1.3859	4.67644e-11	7.08703e-10	15.0305
DUS2	-1.19228	1.51498e-09	1.51941e-08	11.8062
RRM1	-1.65551	1.44345e-13	4.79053e-12	20.9566
SMG8	-1.36626	9.90001e-12	1.81521e-10	16.8046
CDT1	-1.90987	5.88806e-14	2.23746e-12	22.0099
TUBA1C	-1.30623	2.23652e-12	5.05187e-11	18.0223
AXL	-2.48916	8.18318e-10	8.69652e-09	12.6149
CHAF1A	-1.79309	5.62417e-15	3.10322e-13	24.3236
TSR1	-1.23293	1.2991e-13	4.352e-12	21.0074
CD320	-1.62012	1.91638e-15	1.27916e-13	25.354
TK1	-1.63784	4.72961e-13	1.33161e-11	19.75
PBK	-2.46416	3.46128e-11	5.41589e-10	15.722
MFSD2A	-1.90884	1.17132e-07	7.2812e-07	7.75954
DTYMK	-1.401	1.51764e-13	4.99951e-12	20.9398
FEN1	-2.04748	1.27005e-13	4.27878e-12	21.1383
IL7R	-3.30668	1.27808e-05	4.98096e-05	3.22191
LCMT2	-1.01669	6.95707e-08	4.58878e-07	7.87397
MAT2A	-1.19086	6.96328e-13	1.85223e-11	19.2158
RAB3B	-3.22724	3.5992e-13	1.04812e-11	20.2125
CKAP2L	-2.95587	1.46033e-11	2.54906e-10	16.5874
BUB1	-2.91114	1.5533e-17	3.14579e-15	30.2399
CHRNA5	-1.15879	3.6257e-09	3.25855e-08	10.9174
FASN	-1.89309	2.13591e-13	6.65492e-12	20.449
WNT10B	-1.95834	3.0371e-05	0.000108602	2.44668
TM4SF1	-2.10011	3.04407e-15	1.88683e-13	24.8138
IFFO2	-1.3275	3.09876e-12	6.61391e-11	17.9893
TMEM154	-1.83037	4.85782e-16	4.24432e-14	26.7697
ADRA1B	-2.50554	9.09864e-07	4.61719e-06	5.80766
CDK1	-2.21332	2.43806e-16	2.51163e-14	27.4841
LONRF2	-3.84063	4.24251e-11	6.5013e-10	15.1922
PA2G4	-1.40417	4.32549e-14	1.70551e-12	22.0945
ELOVL6	-1.60692	3.10485e-13	9.17655e-12	20.2472
TMC7	-1.75983	1.80756e-14	8.21795e-13	23.0646
ARL6IP1	-1.15429	1.27739e-13	4.29541e-12	20.981
POLH	-1.25788	6.50342e-10	7.11067e-09	12.6452
CDCA4	-2.00393	4.08691e-15	2.42789e-13	24.6625
HAS2	-1.201	9.45772e-10	9.93256e-09	12.2926
NETO2	-1.2919	3.59226e-14	1.44844e-12	22.3544
SHCBP1	-2.92566	1.04394e-15	7.78455e-14	26.0062
CHST11	-2.08056	9.25189e-13	2.36291e-11	19.2612
ESCO2	-2.94424	1.26344e-14	6.11876e-13	23.5701
CTPS1	-1.97164	9.96197e-15	5.05752e-13	23.6983
RRM2	-2.64172	4.17565e-16	3.836e-14	26.8999
PRNP	-1.71779	2.998e-17	5.13754e-15	29.5374
SCG2	-2.62812	4.18316e-05	0.000144649	2.19249
THOP1	-1.77422	4.11589e-17	6.60842e-15	29.254
CALB2	-5.00753	8.10271e-17	1.07766e-14	27.756
MTBP	-1.60512	2.79864e-10	3.39533e-09	13.5671
C5orf34	-1.88129	2.09471e-09	2.00601e-08	11.7047
POP7	-1.24836	7.07043e-12	1.35203e-10	17.0298
NIPAL4	-1.96002	0.000175482	0.000527838	0.874292
MYEOV	-1.77388	1.00677e-14	5.08292e-13	23.7195
MIR4435-2HG	-1.36973	1.20338e-08	9.46454e-08	9.85074
HPSE	-1.14894	5.09444e-09	4.41816e-08	10.4901
NOC3L	-1.00254	1.53442e-09	1.53631e-08	11.6089
VANGL1	-2.39124	5.45755e-17	8.10537e-15	28.9879
TNFRSF10D	-2.12033	2.68089e-17	4.73057e-15	29.6858
SLC19A1	-1.79661	1.46079e-16	1.71278e-14	27.98
DPY19L1	-2.03658	1.39187e-18	5.16789e-16	32.6244
EXO1	-2.65141	1.83864e-14	8.33797e-13	23.182
ATP2A2	-1.07508	2.36906e-12	5.25796e-11	17.9546
ZWILCH	-1.3117	3.85183e-11	5.95897e-10	15.3823
GOLT1A	-1.31769	4.27842e-09	3.77662e-08	10.6601
CEP135	-1.37382	6.33012e-09	5.36449e-08	10.4816
UBE2C	-2.45903	2.66195e-19	1.6861e-16	34.2904
CKAP5	-1.08605	6.47553e-12	1.25716e-10	16.9815
CCNE2	-2.05312	3.78406e-10	4.41647e-09	13.3272
CLCF1	-1.38665	4.01716e-09	3.57612e-08	10.9176
P2RY2	-1.6662	3.68798e-14	1.4737e-12	22.3532
FOSL1	-3.33334	4.89105e-19	2.42134e-16	33.4955
SUGCT	-2.98608	2.80283e-05	0.000101015	2.48969
SFN	-1.27297	4.38582e-10	5.0461e-09	12.8753
TUBB6	-1.97125	7.8759e-12	1.48377e-10	17.1617
SPHK1	-1.8393	9.60111e-11	1.33714e-09	14.6922
ATAD5	-1.8538	1.66993e-11	2.85894e-10	16.4052
RIMS2	-3.43023	1.04188e-14	5.21638e-13	23.5156
LMNB2	-1.65734	1.2659e-15	9.02432e-14	25.7206
FOXL1	-3.06361	1.33938e-19	1.19352e-16	34.8879
IRX5	-1.37267	1.40549e-05	5.43826e-05	3.0776
TYMS	-1.61233	2.13829e-11	3.54829e-10	15.9828
POLE	-1.25507	7.26022e-15	3.86244e-13	23.953
PUS1	-1.00739	2.62668e-11	4.24797e-10	15.6499
ZBED2	-3.11879	7.33473e-17	1.00554e-14	28.5922
HASPIN	-2.15719	3.24571e-10	3.8512e-09	13.5159
IMPDH2	-1.54713	1.08818e-06	5.42629e-06	5.52594
POGLUT3	-2.12291	7.78475e-16	6.19374e-14	26.3224
THBD	-2.37306	2.72491e-16	2.72828e-14	27.3704
PFAS	-1.33275	1.35297e-13	4.50704e-12	20.9928
AURKB	-2.5116	9.66634e-17	1.23052e-14	28.4111
RRS1	-1.09379	5.16851e-09	4.47586e-08	10.2752
HES7	-3.74054	4.37197e-08	3.01421e-07	8.6043
ALOXE3	-1.83577	3.4845e-05	0.000122826	2.34665
LDLRAD3	-1.2217	7.28053e-07	3.76862e-06	5.7844
ARID3B	-1.54897	9.98416e-07	5.0194e-06	5.56777
GEMIN4	-1.495	2.5952e-15	1.66973e-13	25.0528
FJX1	-1.55021	1.69028e-12	3.99525e-11	18.6207
PLD6	-1.27683	4.07659e-06	1.79434e-05	4.09065
RCC1	-1.14952	6.88677e-12	1.32401e-10	16.9404
MCFD2	-1.10161	1.24348e-13	4.22119e-12	21.0268
TMEM64	-1.6373	1.89887e-11	3.20774e-10	16.192
ARSJ	-1.14229	2.73704e-09	2.54723e-08	11.1618
OXTR	-1.22724	2.07162e-11	3.45051e-10	15.833
AEN	-1.7247	5.40332e-12	1.07356e-10	17.3125
DDN	-2.57572	4.99966e-11	7.48374e-10	15.3323
FANCB	-1.72869	1.80402e-08	1.36177e-07	9.52366
PHLDA2	-1.4641	4.12609e-10	4.76891e-09	12.948
GINS3	-1.56807	5.9928e-09	5.11401e-08	10.4788
FIGN	-1.37425	1.78995e-05	6.74715e-05	2.85112
AP1S2	-1.46878	7.23399e-10	7.81359e-09	12.3894
KPNA2	-1.94474	1.60029e-16	1.81658e-14	27.8339
MAGEB17	-2.49322	7.56568e-07	3.90828e-06	5.97059
LCK	-1.5083	6.60457e-05	0.000218258	1.56418
SF3A3	-1.03458	1.45037e-12	3.49303e-11	18.5518
ALYREF	-1.17422	1.30982e-11	2.31126e-10	16.353
TRAIP	-1.47813	4.64472e-09	4.06773e-08	10.8408
GPR39	-1.50283	1.07747e-12	2.7046e-11	18.9912
KIRREL1	-1.09789	7.08854e-11	1.03032e-09	14.4988
IQGAP3	-2.5074	2.61068e-16	2.65871e-14	27.3749
CMSS1	-1.09818	1.79918e-07	1.06955e-06	7.06185
KNTC1	-1.33521	2.85959e-11	4.56255e-10	15.5323
GAST	-2.35011	1.64653e-05	6.26083e-05	3.07404
PDE4B	-4.56542	9.25251e-13	2.36291e-11	18.7049
CDCA2	-2.40308	3.63955e-17	5.98658e-15	29.3794
BRI3BP	-1.43824	6.2288e-13	1.68708e-11	19.446
FLRT2	-2.22199	3.08216e-11	4.87836e-10	15.8508
NOMO2	-1.01867	3.37753e-07	1.88874e-06	6.17316
PARPBP	-1.70644	1.66257e-11	2.84982e-10	16.351
MYBL1	-1.75459	5.9517e-06	2.52551e-05	3.92501
MOSMO	-1.09475	1.80131e-09	1.76196e-08	11.4433
KIF18B	-3.0315	2.49804e-17	4.54286e-15	29.6925
SAPCD2	-1.63953	2.57081e-14	1.0961e-12	22.7302
MTARC1	-1.28527	4.86527e-07	2.61329e-06	6.25694
TOR3A	-1.22873	1.1169e-11	2.01471e-10	16.5353
KIF24	-1.33222	5.06837e-08	3.45292e-07	8.43887
ERCC6L	-2.3696	1.5264e-12	3.63684e-11	18.8189
NPSR1	-2.53072	2.67063e-15	1.69986e-13	25.1171
SPRY4	-2.18361	6.28796e-19	2.8016e-16	33.436
FANCA	-1.94584	3.40976e-16	3.24967e-14	27.1633
FANCM	-1.42316	2.48878e-09	2.34311e-08	11.305
PEAR1	-2.10003	4.24316e-10	4.88828e-09	13.1085
EIF4EBP1	-1.28371	4.94438e-13	1.37794e-11	19.7209
ARL4C	-2.93455	7.51326e-16	6.03159e-14	26.371
WNT7B	-1.20838	1.06949e-13	3.71973e-12	21.233
TUBB4B	-1.40853	7.24667e-13	1.91902e-11	19.1807
CENPP	-1.32377	1.01192e-05	4.0618e-05	3.35558
H2AX	-1.56289	1.65106e-13	5.34034e-12	20.8029
FAM72B	-2.95252	9.34351e-09	7.53825e-08	10.1508
PARVB	-1.77265	1.80868e-06	8.57978e-06	5.10907
TMEM201	-2.16229	1.64365e-15	1.12666e-13	25.5997
GJB3	-2.02504	1.59088e-14	7.36434e-13	23.2571
CGB5	-3.96393	1.91345e-07	1.12882e-06	6.93127
FAM111B	-2.45747	1.53932e-13	5.05226e-12	21.0275
JPT1	-1.25936	2.727e-11	4.38237e-10	15.5109
GJB5	-1.70325	2.57931e-07	1.47951e-06	6.97987
SH2D5	-1.17947	8.69999e-06	3.54646e-05	3.39704
TUBB	-1.46253	3.56826e-15	2.16305e-13	24.6157
IARS1	-1.17261	8.58492e-14	3.09092e-12	21.403
FUT4	-2.026	2.38755e-17	4.3867e-15	29.7974
XRCC2	-2.47579	2.00187e-12	4.59167e-11	18.5468
MMP1	-4.83765	1.04419e-21	2.6585e-18	38.8865
SNHG17	-1.36103	2.21136e-12	5.00138e-11	18.1867
ADA	-1.80904	8.96116e-11	1.25852e-09	14.7912
FLNA	-1.13646	2.69051e-10	3.28202e-09	13.083
ACSL5	-1.30889	5.01452e-13	1.39421e-11	19.5478
BLM	-2.08049	6.29703e-12	1.22651e-10	17.4096
ZNF860	-1.71056	9.38941e-08	5.9705e-07	7.95682
MCMBP	-1.06488	4.20613e-12	8.61629e-11	17.4394
ATAD3A	-1.11408	1.7027e-11	2.90945e-10	16.1267
SNHG12	-1.00168	1.49324e-09	1.49845e-08	11.6807
MAK16	-1.16008	1.12495e-09	1.16191e-08	11.9539
PRIM1	-2.43193	3.20115e-13	9.4299e-12	20.3627
ZNF485	-1.10687	1.8247e-06	8.65117e-06	4.76042
ASPH	-3.29399	1.763e-23	1.04734e-19	43.8048
WDHD1	-1.7819	1.12853e-12	2.81689e-11	18.9907
MT-ND6	-1.00532	6.93939e-09	5.79312e-08	9.81307
ARHGAP11A	-2.44395	2.31936e-14	1.00811e-12	22.953
TOP1	-1.61952	1.85784e-16	2.04081e-14	27.6534
PRC1	-1.90779	7.70025e-10	8.26097e-09	12.6791
SNORA33	-1.84801	0.000133271	0.000411736	1.0964
IQANK1	-1.33891	3.82601e-14	1.52544e-12	22.3176
CENPW	-1.87937	2.5466e-10	3.13137e-09	13.7589
MICB	-3.52437	2.1287e-06	9.90283e-06	4.82633
MICA	-1.10424	7.34443e-09	6.10221e-08	10.0487
FAM216A	-2.24204	1.12092e-08	8.88659e-08	10.0614
SLC35B4	-2.02729	1.42974e-14	6.77684e-13	23.4243
C4orf46	-1.12495	6.93749e-06	2.90781e-05	3.52443
KRT6A	-4.66198	1.02487e-06	5.14512e-06	4.79658
ONECUT3	-1.80829	3.35239e-15	2.04611e-13	24.7955
PRR22	-1.15762	9.62005e-06	3.88596e-05	3.27404
LINC02693	-1.63705	1.4211e-08	1.09831e-07	9.70953
CGB8	-4.14119	2.04362e-05	7.60136e-05	2.45737
ARHGAP19	-2.84948	2.64353e-13	7.98524e-12	20.5043
HAUS7	-1.24205	0.000166932	0.000504202	0.659721
TMX2	-1.20946	9.95358e-13	2.52696e-11	18.907
EMP2	-2.55758	2.59787e-17	4.67669e-15	29.718
TSPAN4	-1.1234	9.90324e-05	0.000314497	0.95581
TUBAP2	-2.30978	1.63961e-05	6.23716e-05	3.07881
IFRD2	-1.34378	3.268e-14	1.33278e-12	22.4501
FAM72D	-2.68376	0.000350949	0.000984546	0.259502
SLC12A8	-1.20418	1.12359e-09	1.16152e-08	12.011
CYTOR	-2.07803	9.00092e-08	5.74962e-07	8.00276
RN7SKP97	-2.67336	8.43825e-05	0.000271996	1.53388
LINP1	-1.67264	1.1013e-05	4.37232e-05	3.37587
ENSG00000225339	-2.28267	4.86374e-08	3.33006e-07	8.64113
ELFN1	-1.44884	7.77968e-05	0.000253301	1.42673
TMEM185B	-1.01913	3.68434e-12	7.66188e-11	17.5663
ERVMER34-1	-2.0817	4.98808e-14	1.94717e-12	22.1984
SNHG26	-4.24083	3.47104e-09	3.14334e-08	10.6678
ITGB1-DT	-2.87211	3.82474e-10	4.45519e-09	13.2574
LNCAROD	-3.12326	2.40948e-14	1.03724e-12	22.8885
EVA1A-AS	-4.75533	1.83871e-06	8.71066e-06	4.35923
COMETT	-3.36001	0.000315702	0.000892661	0.243158
MANCR	-3.70077	2.70168e-10	3.29159e-09	13.5811
LINC-PINT	-1.27992	4.77267e-07	2.56742e-06	5.87027
MYADM-AS2	-3.43924	0.000203107	0.000599399	0.530706
EMSLR	-2.25722	4.92178e-16	4.27883e-14	26.7992
SNHG15	-1.40982	5.86901e-13	1.59691e-11	19.5598
UBE2SP1	-2.23688	7.67362e-07	3.95945e-06	5.97776
MIR155HG	-1.84273	0.000385246	0.00107162	0.111919
KIAA0040	-3.3968	3.15097e-24	2.80783e-20	45.3625
LDHAP7	-1.29579	1.70153e-07	1.01692e-06	7.26002
PRKG1-AS1	-3.05573	2.87492e-06	1.30109e-05	4.63281
KIFC1	-2.56273	4.42647e-19	2.3348e-16	33.7491
MAGEB17-AS1	-3.32398	3.64414e-08	2.56096e-07	8.65584
TXNDC5	-1.10615	1.99667e-06	9.36191e-06	4.67063
NME1	-1.72753	1.21316e-12	2.98221e-11	18.8443
LINC00973	-3.63456	9.54012e-14	3.38892e-12	21.1861
SNHG3	-1.52279	1.17327e-12	2.90383e-11	18.8388
PRR7-AS1	-1.24985	5.06347e-06	2.17921e-05	4.00007
MARS2	-1.50799	1.73947e-12	4.08981e-11	18.564
LUCAT1	-5.12621	2.14675e-09	2.05254e-08	11.454
PVT1	-1.47142	1.17476e-12	2.90383e-11	18.9256
TMEM158	-2.79244	6.87304e-09	5.75076e-08	10.4655
ENSG00000250657	-7.68538	8.86767e-07	4.51671e-06	5.11137
LINC00589	-2.39736	8.61798e-09	7.01323e-08	10.3255
PRKDC	-1.12432	3.65901e-12	7.61809e-11	17.5179
RTL1	-4.35478	2.15245e-06	9.98982e-06	4.19518
MIR100HG	-4.09268	2.28451e-05	8.40687e-05	2.32238
SNHG1	-1.13012	1.31467e-11	2.31523e-10	16.2897
LINC02454	-3.20281	0.000178975	0.000537528	0.769211
ENSG00000256433	-1.51674	0.000112312	0.000352462	1.15087
ENSG00000256663	-2.6769	2.11792e-08	1.57012e-07	9.41655
PHLDA1-AS1	-1.90521	1.983e-06	9.31497e-06	5.01634
ENSG00000258077	-2.36345	5.99233e-10	6.64977e-09	12.9325
RTEL1	-1.20908	1.92627e-06	9.07479e-06	4.84134
ENSG00000260196	-1.77278	2.36676e-11	3.88401e-10	16.0663
SNHG19	-1.69392	4.84957e-08	3.32164e-07	8.5732
TBC1D22A-DT	-1.37674	1.38443e-05	5.36142e-05	3.06416
ST3GAL1-DT	-1.44931	0.000203065	0.000599375	0.645528
BOP1	-1.32612	1.08742e-12	2.72574e-11	18.825
ENSG00000263235	-1.93414	1.31964e-07	8.10707e-07	7.67249
SNHG25	-1.18587	5.89873e-07	3.10935e-06	5.99526
SNHG30	-1.29865	1.03754e-06	5.19988e-06	5.44584
ITGB1P1	-1.26549	1.18751e-05	4.66867e-05	3.17107
NBPF8	-1.42372	2.34193e-08	1.72115e-07	9.16114
MILR1	-3.35275	1.12588e-13	3.88415e-12	21.0728
POM121C	-1.03032	4.0549e-12	8.36417e-11	17.52
ENSG00000272622	-1.32668	1.42111e-12	3.43561e-11	18.719
UHRF1	-2.75913	4.81235e-16	4.24432e-14	26.8162
RDM1	-1.43906	5.9354e-05	0.000198575	1.72949
ACACA	-1.27991	1.00615e-13	3.52939e-12	21.302
ENSG00000279806	-1.96445	2.10273e-05	7.804e-05	2.83273
ENSG00000280206	-1.76478	1.00243e-08	8.01857e-08	10.0747
SLFNL1-AS1	-1.77331	1.96625e-05	7.33873e-05	2.86448
HELLPAR	-2.19539	2.51266e-05	9.14636e-05	2.67914
SNHG4	-1.61427	1.14701e-11	2.06277e-10	16.5425
EEF1AKMT4	-1.08337	7.1431e-07	3.70178e-06	5.64605
ENSG00000284946	-2.67106	2.63308e-08	1.90372e-07	9.23216
LINC00941	-3.61097	1.76474e-17	3.526e-15	29.7038
RUNX1-AS1	-4.6861	8.99791e-08	5.74962e-07	7.8725
ENSG00000289154	-1.28391	9.4206e-05	0.000300723	1.23008
ENSG00000289261	-1.169	2.04313e-05	7.60136e-05	2.66993
ENSG00000289850	-2.71684	2.4122e-20	2.68689e-17	36.6803
FAM86B3P	-1.52545	1.02683e-08	8.19166e-08	9.82552
RPSAP52	-1.97333	0.000160646	0.000486992	0.949169
ENSG00000295821	-1.69462	9.45656e-10	9.93256e-09	12.3397
ENSG00000295873	-2.37764	9.62969e-07	4.85764e-06	5.76506
ENSG00000295911	-2.01185	1.86798e-06	8.83055e-06	5.07799
ENSG00000299701	-1.01148	3.8413e-06	1.69749e-05	3.97117
ENSG00000299739	-1.62773	3.79938e-06	1.68146e-05	4.38043
ENSG00000305512	-1.39645	0.000329701	0.000929498	0.131709
ENSG00000306000	-1.49278	1.05072e-10	1.4505e-09	14.3091
ENSG00000307083	-1.90672	9.17532e-11	1.28354e-09	14.3018
ENSG00000308375	-3.14938	4.25001e-09	3.75612e-08	10.8515
ENSG00000308602	-2.72977	3.30542e-08	2.34232e-07	8.98883
ENSG00000309952	-4.74015	1.80905e-05	6.81338e-05	2.58719
ENSG00000310521	-2.02419	0.000148636	0.000453647	1.03176

## Sheet: HPAFII MRTX1133 vs Vehicle
gene_name	MvsC_H.logFC	MvsC_H.P.Value	MvsC_H.adj.P.Val	MvsC_H.B
FIRRM	-1.90098	2.86549e-12	4.84063e-11	18.133
HS3ST1	-3.28279	4.44157e-21	7.0589e-18	38.3497
CAMKK1	-1.29659	4.63487e-09	3.44896e-08	10.7542
REXO5	-1.81299	1.54099e-09	1.28155e-08	11.9807
TNFRSF12A	-1.89693	2.92104e-16	2.09914e-14	27.1956
PHTF2	-1.21697	8.25464e-11	9.45465e-10	14.4773
ELAC2	-1.34562	9.07299e-14	2.43156e-12	21.3893
E2F2	-2.95734	2.39854e-13	5.62576e-12	20.5713
MGST1	-1.2552	5.86685e-13	1.21722e-11	19.4251
ST3GAL1	-1.30588	1.12534e-11	1.59173e-10	16.5012
NCAPD2	-1.93925	1.3194e-16	1.0988e-14	28.0337
ANLN	-2.87459	1.03663e-18	2.60208e-16	32.9288
BRCA1	-2.6961	2.79369e-16	2.03221e-14	27.3627
EXTL3	-1.28067	5.74276e-15	2.33138e-13	24.1848
TACC3	-2.1595	8.84282e-19	2.3176e-16	33.0957
POLA2	-2.2852	2.40575e-13	5.62668e-12	20.6491
SLC38A5	-2.6214	4.57866e-19	1.60002e-16	33.738
SNAI2	-2.27991	3.95183e-09	3.00283e-08	11.0863
ZDHHC6	-1.0602	5.27534e-12	8.16829e-11	17.2027
DEPDC1	-2.51818	9.81654e-14	2.5957e-12	21.4953
RTEL1-TNFRSF6B	-1.32004	4.2691e-07	2.04472e-06	6.24192
FAS	-1.70677	4.71608e-07	2.23478e-06	6.39749
CENPQ	-1.61407	7.82835e-09	5.53639e-08	10.317
ALG1	-1.38541	3.1322e-15	1.44993e-13	24.8203
SLC4A7	-1.67469	7.1866e-15	2.81494e-13	24.0321
VCL	-1.02329	7.11951e-11	8.30935e-10	14.4666
DEPDC1B	-1.97702	8.42799e-13	1.66893e-11	19.3687
SPDL1	-2.56401	7.26275e-19	2.05455e-16	33.2336
TNC	-1.85865	3.53447e-08	2.14184e-07	8.39416
RAD51	-2.34646	1.6109e-11	2.19827e-10	16.4914
POLQ	-2.92708	4.01868e-16	2.69251e-14	26.9471
MRTO4	-2.03006	1.2934e-16	1.09068e-14	28.1081
RELT	-2.2994	8.08229e-16	4.8663e-14	26.2916
NOP58	-1.52625	6.04375e-15	2.43692e-13	24.1436
DCBLD2	-2.08043	7.11226e-19	2.04443e-16	33.2882
LAMC2	-1.28972	9.46654e-10	8.34798e-09	11.8073
NDC1	-2.18141	6.55276e-19	1.96562e-16	33.392
ATP2C2	-1.64127	2.72167e-12	4.64169e-11	18.1977
IPO5	-1.42106	1.16972e-13	3.03006e-12	21.1611
MCM10	-4.10182	7.63776e-18	1.15356e-15	30.4771
ASPM	-2.58358	2.07041e-19	9.2247e-17	34.535
PFKP	-1.83007	6.89951e-17	6.54059e-15	28.6759
PHKA1	-1.21024	1.07328e-11	1.5278e-10	16.6872
PKM	-1.37896	1.03033e-13	2.71234e-12	21.1485
NAV3	-1.88507	3.0827e-08	1.89252e-07	9.06539
PRR11	-2.31915	1.30353e-16	1.09068e-14	28.1127
EIF2B3	-2.20035	2.03933e-11	2.7197e-10	16.2025
TCOF1	-2.91513	3.44117e-21	7.0589e-18	38.5915
TRIP13	-2.37952	2.30814e-17	2.65391e-15	29.8237
TFRC	-2.34758	1.43557e-19	7.5249e-17	34.9017
SMC1A	-1.4976	2.00388e-15	1.01747e-13	25.2646
HMMR	-2.49951	1.39883e-15	7.69444e-14	25.7102
TRHDE	-1.39847	2.77311e-12	4.70001e-11	17.9016
SCARB1	-1.53849	1.20054e-14	4.36652e-13	23.4278
MCM2	-2.51628	2.0037e-19	9.15638e-17	34.575
GLI2	-3.17163	1.25918e-09	1.07488e-08	12.1663
ENO1	-1.6904	3.63559e-15	1.619e-13	24.5892
MYDGF	-1.15643	5.18276e-11	6.24947e-10	14.8694
TIPIN	-2.49028	1.21204e-11	1.69553e-10	16.7714
NUP37	-1.28299	2.77165e-12	4.70001e-11	18.0156
SEMA3A	-1.41889	3.559e-13	7.80178e-12	19.9546
GTSE1	-2.56333	3.89478e-17	4.03562e-15	29.3203
TIMM21	-2.20504	5.67744e-16	3.65283e-14	26.6559
FSCN1	-1.1014	1.6277e-12	2.96917e-11	18.4089
WDR62	-3.22425	1.01282e-18	2.57865e-16	32.7737
MCM6	-2.6258	3.77926e-18	6.87286e-16	31.6463
PLXNA2	-1.37508	3.34731e-11	4.23691e-10	15.5202
SPAG5	-2.84673	1.2041e-16	1.04172e-14	28.197
UBE2T	-2.43358	2.35378e-14	7.79084e-13	22.954
TP73	-1.08204	4.1949e-05	0.00013317	1.76425
KIF22	-2.2816	3.55165e-19	1.3187e-16	34.0049
RBL1	-2.24765	3.96095e-15	1.71706e-13	24.7138
NDC80	-2.00079	3.07735e-14	9.7545e-13	22.6689
GEMIN5	-2.01418	1.26841e-15	7.06668e-14	25.806
P2RX5	-2.27605	5.77898e-12	8.81789e-11	17.4969
FAM234B	-1.06909	8.42191e-08	4.66279e-07	7.76303
CAD	-1.63788	3.71156e-16	2.52471e-14	26.971
ORC1	-3.41233	1.48878e-16	1.22272e-14	27.8021
ATG16L1	-1.46622	1.28292e-14	4.62838e-13	23.4157
RAD54L	-1.52967	8.45882e-12	1.23568e-10	17.0279
LAT2	-2.45821	2.0947e-13	4.99756e-12	20.7554
PHACTR3	-2.04693	2.16105e-11	2.86992e-10	16.1337
AURKA	-2.30097	5.83874e-18	9.20868e-16	31.2085
TPX2	-2.80108	7.01069e-20	3.85404e-17	35.6242
SMOX	-1.08777	5.72061e-10	5.26887e-09	12.575
BIRC5	-2.64854	1.52743e-17	1.9584e-15	30.2306
KIF4A	-2.46287	1.76009e-17	2.16351e-15	30.1143
ITGA6	-1.71201	1.7065e-15	9.03034e-14	25.3754
MAP3K20	-1.27707	1.34782e-11	1.86932e-10	16.4445
ORC6	-2.55587	2.73999e-12	4.66401e-11	18.2385
G2E3	-1.20604	2.1697e-08	1.37954e-07	8.81188
WDR76	-2.55307	5.96898e-12	9.06898e-11	17.47
CLSPN	-3.42181	1.02885e-16	9.07733e-15	28.3219
TGFB2	-2.0195	4.64112e-15	1.94164e-13	24.5468
CDC45	-3.64561	8.59873e-16	5.1253e-14	26.1503
CDC6	-2.5008	2.89528e-17	3.12726e-15	29.6158
NUP188	-1.89386	6.70051e-17	6.38591e-15	28.7361
CDC7	-1.46658	2.23484e-11	2.95909e-10	16.0403
NRP1	-2.2152	2.50424e-19	1.03792e-16	34.3544
RANBP1	-2.00799	3.65116e-16	2.50273e-14	27.0513
LGALS1	-1.55636	9.16148e-10	8.10704e-09	12.0782
CENPM	-2.15915	2.17429e-12	3.82529e-11	18.4488
MCM5	-2.15236	9.63193e-18	1.3458e-15	30.7029
PRMT5	-1.43503	3.42048e-15	1.55367e-13	24.7141
POLE2	-2.47886	3.47782e-13	7.64895e-12	20.2844
CDKL1	-1.21685	2.63909e-08	1.6411e-07	9.01017
CDKN3	-2.10697	1.82671e-12	3.28368e-11	18.549
CNIH1	-1.33939	1.60204e-14	5.58738e-13	23.1403
CEP128	-1.61048	1.42339e-08	9.47972e-08	9.70726
MTHFD1	-1.30179	3.50024e-14	1.07926e-12	22.3121
VRK1	-2.28053	1.48477e-15	8.04562e-14	25.6985
PROCR	-2.48559	5.16331e-20	3.28645e-17	35.9296
MYBL2	-2.57527	2.19819e-16	1.653e-14	27.5693
SLCO4A1	-1.9533	5.88775e-16	3.76098e-14	26.4961
NTSR1	-3.74653	8.87178e-23	1.19733e-18	42.1428
FERMT1	-1.17964	1.8895e-14	6.42646e-13	22.9215
POFUT1	-1.64448	3.36894e-17	3.57388e-15	29.4063
NOP56	-2.17654	2.84554e-20	2.30514e-17	36.5241
JAG1	-1.37281	8.69115e-15	3.33823e-13	23.7502
E2F1	-2.9526	3.15085e-17	3.36254e-15	29.5285
FAM83D	-2.5079	4.05533e-18	7.01689e-16	31.5758
CSTF2	-1.48459	9.51256e-14	2.52657e-12	21.3837
VSIG1	-2.45725	1.21792e-06	5.28738e-06	5.53804
POLA1	-1.92801	6.95708e-14	1.93129e-12	21.8317
SUV39H1	-1.54446	3.15212e-10	3.10886e-09	13.4125
CENPI	-2.28037	3.69914e-15	1.63184e-13	24.7895
GLA	-2.12438	6.6079e-17	6.3315e-15	28.7555
CORO1A	-2.47952	7.81964e-10	7.02074e-09	12.6682
GDPD3	-1.11941	1.84963e-06	7.71994e-06	4.73032
DHODH	-1.59534	1.34386e-10	1.45153e-09	14.3012
HAS3	-2.86363	9.81403e-17	8.78922e-15	28.3911
COTL1	-1.18835	8.25087e-11	9.45465e-10	14.3664
ABCC1	-1.6207	2.30637e-15	1.15138e-13	25.0938
SLC7A5	-2.1283	3.58049e-18	6.68445e-16	31.6704
OIP5	-1.95915	1.83237e-09	1.49938e-08	11.7973
POP1	-1.70834	5.10164e-14	1.48807e-12	22.0633
TNFRSF10A	-2.17815	1.29125e-16	1.09068e-14	28.1299
MCM4	-3.03419	3.30763e-20	2.35794e-17	36.3708
KCNN4	-1.68607	5.03868e-15	2.08836e-13	24.3684
AMH	-1.48601	6.57398e-06	2.448e-05	3.71982
ASF1B	-2.21096	1.422e-13	3.57951e-12	21.1254
CCNE1	-2.10827	1.92115e-09	1.56627e-08	11.7772
GPI	-1.16162	2.32145e-12	4.04032e-11	18.0141
SLC1A5	-1.92448	4.12054e-18	7.06118e-16	31.5232
LIG1	-1.58981	3.29366e-14	1.02982e-12	22.4972
TNPO2	-1.31191	1.62973e-14	5.66179e-13	23.1375
CAV2	-1.22051	6.47019e-12	9.73916e-11	17.0491
CAV1	-2.72704	8.38518e-19	2.23046e-16	33.1478
FKBP14	-1.49487	3.16541e-13	7.10503e-12	20.2497
EPHB6	-2.25608	3.49686e-14	1.07926e-12	22.5495
IMPDH1	-1.85293	3.58841e-15	1.60685e-13	24.7797
EZH2	-1.62117	2.06114e-15	1.04062e-13	25.3047
PALD1	-2.81293	2.85984e-14	9.2627e-13	22.706
TWNK	-1.31308	1.9594e-10	2.04332e-09	13.7392
NPM3	-1.35469	1.98068e-10	2.0631e-09	13.7569
BCCIP	-1.18146	1.77046e-10	1.86374e-09	13.6718
DKK1	-3.78858	8.23201e-17	7.6812e-15	28.5178
TASOR2	-1.31658	5.97144e-15	2.41322e-13	24.1601
TFAM	-1.13845	1.60416e-11	2.19243e-10	16.1736
UBE2S	-2.62975	5.18251e-17	5.13126e-15	29.0397
PPIF	-1.39837	1.19232e-11	1.67319e-10	16.4906
RAD51C	-1.38593	1.19934e-06	5.22099e-06	5.32113
C1QBP	-1.67927	3.30438e-16	2.30944e-14	27.1159
TMEM33	-1.23692	9.38751e-15	3.56725e-13	23.6785
AREG	-1.32971	3.99941e-10	3.8466e-09	12.7343
ANXA10	-1.22691	4.5484e-08	2.6765e-07	7.98714
GRPEL1	-1.37808	1.06763e-10	1.18995e-09	14.3447
NEIL3	-3.17684	4.56906e-12	7.22535e-11	17.7087
NSD2	-1.36281	3.0883e-15	1.43707e-13	24.8399
NCAPG	-3.07366	4.04174e-18	7.01689e-16	31.5445
TMEM109	-2.25177	4.72606e-17	4.78567e-15	29.0967
NECTIN1	-2.73649	3.73365e-22	1.33082e-18	40.7827
KIAA1549L	-3.21982	5.95809e-12	9.06017e-11	17.4438
SLC35F2	-1.61439	6.12681e-17	6.02623e-15	28.8029
CAPRIN2	-1.81683	1.88521e-11	2.53955e-10	15.9761
FOXM1	-2.21293	1.85076e-15	9.61642e-14	25.4388
NAA25	-1.3232	1.67301e-14	5.77837e-13	23.1422
DDX55	-1.52506	1.43484e-13	3.60673e-12	21.0402
SLC38A1	-1.39331	6.03613e-16	3.842e-14	26.4419
RFC5	-2.15376	1.06027e-15	6.07595e-14	26.0297
TBC1D30	-1.22573	2.40537e-05	8.04015e-05	2.46527
TIMELESS	-1.53951	1.47568e-14	5.21818e-13	23.234
NOP2	-1.8346	7.71527e-08	4.3023e-07	8.13171
CDCA3	-3.07796	1.76024e-17	2.16351e-15	30.0444
NT5DC3	-1.3602	7.02441e-09	5.01157e-08	10.3829
DDX12B	-2.21203	1.93103e-06	8.02771e-06	5.09298
PAK1IP1	-1.81183	1.77112e-14	6.07018e-13	23.2196
FBXO5	-1.91018	1.92133e-12	3.43795e-11	18.5492
MCM3	-2.25055	2.10295e-18	4.57058e-16	32.2316
MDGA1	-1.70083	3.18484e-07	1.5645e-06	6.66086
BAG2	-1.08672	1.1951e-07	6.38846e-07	7.21786
GMNN	-2.00063	1.63676e-13	4.07406e-12	21.0233
MDFI	-1.1869	1.20894e-09	1.03685e-08	11.9636
TTK	-2.36272	2.86373e-14	9.2627e-13	22.7407
SLC29A1	-3.49004	5.05463e-21	7.0589e-18	38.1533
LAMA4	-1.05795	1.5498e-07	8.09749e-07	6.85405
KIF20A	-2.37308	3.97958e-18	7.01689e-16	31.5938
FAF2	-1.24869	2.03699e-14	6.88865e-13	22.8777
POLR3G	-2.07988	1.11711e-11	1.58135e-10	16.8152
LMNB1	-2.08617	7.12984e-16	4.38166e-14	26.3474
BRIX1	-1.47367	1.57073e-13	3.92617e-12	20.9313
NUP155	-2.07285	7.80358e-19	2.15745e-16	33.2197
TCERG1	-1.27508	3.12778e-13	7.04719e-12	20.1356
SMC4	-2.09542	1.97711e-18	4.35013e-16	32.2788
ECT2	-1.32614	3.67129e-12	5.96987e-11	17.559
C3orf52	-1.16912	1.38552e-08	9.25864e-08	9.52604
RRP9	-1.7804	7.07749e-14	1.96166e-12	21.7901
SLC4A3	-1.02621	0.000245457	0.000666362	0.108136
NCL	-1.81652	2.0747e-17	2.41668e-15	29.8691
CENPA	-2.27312	8.04579e-12	1.1802e-10	17.1768
AUP1	-1.49911	9.02968e-15	3.45337e-13	23.7167
CCDC88A	-1.7446	3.83955e-13	8.31452e-12	20.1511
EVA1A	-2.50738	1.24394e-08	8.40389e-08	9.93589
EHBP1	-1.06204	3.82079e-12	6.18476e-11	17.5728
HPCAL1	-1.13777	1.99477e-11	2.67098e-10	15.9385
ODC1	-1.88845	5.43807e-16	3.56314e-14	26.6187
EPHA4	-1.58274	1.41827e-05	4.93472e-05	3.1092
FARSB	-1.75081	5.0616e-13	1.07263e-11	19.6796
DHCR24	-1.28541	1.71934e-10	1.81744e-09	13.5661
ICMT	-1.55231	2.49461e-15	1.2214e-13	25.0317
ERRFI1	-1.40066	2.76874e-12	4.70001e-11	17.8498
SRM	-1.55206	1.44303e-12	2.67486e-11	18.6778
TTF2	-1.95722	3.3386e-16	2.32424e-14	27.1764
SLC2A1	-2.42108	5.1916e-19	1.74018e-16	33.6189
CDC20	-2.99334	4.61093e-21	7.0589e-18	38.2951
F3	-2.04986	4.53779e-16	3.00641e-14	26.7286
DARS2	-1.09511	1.2047e-10	1.32042e-09	14.0739
NEK2	-1.73714	1.01738e-11	1.45596e-10	16.8516
CENPF	-2.67997	3.28441e-20	2.35794e-17	36.3722
POLR1G	-2.26532	3.50489e-16	2.42109e-14	27.1359
KIF14	-2.78622	1.76816e-16	1.4068e-14	27.7958
NRP2	-1.90235	2.39516e-18	4.9065e-16	32.0731
MYB	-1.67769	2.31455e-07	1.17021e-06	7.02068
DCLRE1B	-1.56357	2.44377e-09	1.94345e-08	11.4317
CTNNAL1	-1.25006	2.04779e-13	4.90533e-12	20.589
NEK6	-1.19028	5.05819e-07	2.3773e-06	6.14583
ATL2	-1.33049	1.58677e-14	5.54499e-13	23.2065
GPAM	-1.53616	1.029e-12	1.99712e-11	19.0218
HELLS	-2.27181	1.86079e-15	9.64038e-14	25.4564
MTHFD1L	-1.30691	6.27633e-12	9.50354e-11	17.1764
ARAP3	-1.05296	1.40806e-07	7.42218e-07	7.19074
CCDC77	-1.19381	4.05929e-08	2.42442e-07	8.56151
EXOSC8	-1.3359	3.86461e-12	6.25001e-11	17.7243
EGR1	-1.02246	3.08479e-06	1.22662e-05	3.93585
UTP20	-1.60332	1.17335e-14	4.30276e-13	23.5155
DUSP4	-2.34478	1.02634e-16	9.07733e-15	28.3581
UBIAD1	-1.72341	5.15945e-15	2.12359e-13	24.404
NCAPH	-3.22109	2.72023e-18	5.44719e-16	31.9022
LRAT	-2.15349	8.3271e-05	0.000248919	1.55991
ADCY7	-1.7019	3.60122e-12	5.87462e-11	17.7381
KIF18A	-1.29443	5.90878e-10	5.43096e-09	12.6388
MRPS2	-1.121	7.73121e-11	8.92394e-10	14.5653
SHLD2	-1.12035	2.3546e-10	2.40479e-09	13.6145
CCDC18	-2.3175	1.99916e-12	3.55934e-11	18.5499
HNRNPA2B1	-1.09447	2.01749e-13	4.85232e-12	20.4765
PLAU	-2.44721	2.10085e-16	1.60693e-14	27.5305
ZWINT	-2.03301	2.90409e-16	2.09541e-14	27.3044
CIT	-2.14379	1.57584e-16	1.27658e-14	27.9118
PRDX4	-1.86301	3.12683e-14	9.84566e-13	22.4978
ADGRE5	-1.49789	2.394e-15	1.18475e-13	25.095
CENPK	-1.3698	7.14458e-08	4.02436e-07	7.88911
CDK2	-1.44367	5.00069e-14	1.46102e-12	22.0934
TUBA1B	-2.42966	1.29802e-16	1.09068e-14	28.0057
HJURP	-2.95217	6.57546e-20	3.78025e-17	35.6145
NDUFAF4	-1.29571	3.27462e-07	1.60595e-06	6.5283
EXOSC9	-1.50649	4.99819e-13	1.06045e-11	19.8261
ACSL3	-1.14612	2.06375e-12	3.65245e-11	18.1673
CHPF	-1.51021	1.24082e-14	4.4947e-13	23.3493
TOX2	-1.13889	1.0733e-06	4.70909e-06	5.41934
CSE1L	-1.63113	9.76378e-16	5.74291e-14	25.9754
SNAI1	-2.29354	2.68674e-06	1.08406e-05	4.7858
EREG	-2.27144	9.66573e-18	1.3458e-15	30.66
AHNAK	-1.04701	6.13733e-11	7.25193e-10	14.591
ABCC4	-2.31771	1.20423e-11	1.68724e-10	16.7618
EFNB2	-2.56926	7.34962e-21	9.35607e-18	37.8303
SOX21	-3.17671	5.62091e-06	2.11878e-05	3.98219
HROB	-2.03908	4.10697e-09	3.10936e-08	11.0286
SLC25A19	-2.49595	1.58693e-12	2.90372e-11	18.7802
POLR1B	-1.48506	6.18908e-14	1.75082e-12	21.8462
TNFSF9	-1.44978	4.15489e-09	3.13631e-08	10.7913
FOXA2	-1.09749	2.4839e-07	1.2491e-06	6.63961
SNRPB	-1.40495	7.99348e-15	3.09695e-13	23.8159
MCM8	-2.02852	9.23133e-13	1.80991e-11	19.2995
NCLN	-1.95063	2.82349e-18	5.59114e-16	31.9124
GRPR	-3.12222	3.95265e-18	7.01689e-16	31.5587
XRCC3	-2.88838	2.49533e-17	2.80977e-15	29.732
BCL2L12	-1.7975	3.64069e-13	7.93208e-12	20.2041
DLGAP5	-2.6769	1.33658e-18	3.09358e-16	32.6832
IPPK	-1.15111	6.56314e-08	3.72986e-07	8.01284
EMC1	-1.50234	3.38955e-14	1.05058e-12	22.3815
PKMYT1	-3.6902	2.57598e-22	1.19733e-18	40.8766
CHTF18	-2.0862	1.78055e-17	2.17349e-15	30.1001
TUBA4A	-1.67478	1.0444e-14	3.91034e-13	23.5902
PAICS	-1.60002	2.38912e-14	7.883e-13	22.7363
PPAT	-1.54801	3.05396e-12	5.11058e-11	17.981
SDF2L1	-1.94389	3.48003e-12	5.71096e-11	17.8416
STRIP2	-1.29759	7.59762e-11	8.80395e-10	14.7223
KNSTRN	-2.11569	4.6315e-15	1.94164e-13	24.5661
E2F8	-2.80575	1.98183e-10	2.0631e-09	14.0186
PIMREG	-2.66048	5.57585e-12	8.57788e-11	17.5389
KRI1	-1.55875	1.76673e-15	9.28812e-14	25.4526
SGO1	-1.88548	4.57544e-11	5.58829e-10	15.4373
LDLR	-1.57698	7.63023e-11	8.83599e-10	14.411
TOMM40	-2.01212	2.75915e-16	2.01531e-14	27.3193
ATP8B3	-2.49747	1.59054e-07	8.29817e-07	7.4869
COLGALT1	-1.20098	1.04478e-12	2.01954e-11	18.8421
CEP85	-1.84372	3.61064e-11	4.5348e-10	15.6673
EXOSC2	-1.39695	1.34634e-12	2.51779e-11	18.7744
DNMT1	-2.24793	2.78711e-19	1.12891e-16	34.246
NOL11	-1.37453	1.31548e-12	2.47043e-11	18.723
SYNE1	-1.29758	1.01516e-07	5.52604e-07	7.52661
ULBP3	-1.88397	2.71864e-09	2.13726e-08	11.3721
GINS2	-3.20411	9.46778e-14	2.51843e-12	21.4053
PRR7	-1.46778	5.63461e-09	4.11726e-08	10.5266
PSMC3IP	-2.39583	3.33815e-13	7.41802e-12	20.3094
TNS4	-3.17897	9.88841e-18	1.35562e-15	30.6839
TOP2A	-2.6989	3.3665e-18	6.45137e-16	31.7477
NUP210	-2.00353	3.50195e-17	3.64981e-15	29.3981
SCLY	-1.25507	3.60251e-07	1.75365e-06	6.5485
FIGNL1	-1.4216	9.03804e-13	1.77985e-11	19.155
EIF5A	-1.21566	1.42915e-10	1.53436e-09	13.7507
PCNA	-2.05613	9.73688e-17	8.76418e-15	28.3446
LGR6	-1.16873	5.22344e-10	4.86121e-09	12.5427
DCLK1	-3.33879	6.1354e-05	0.000188656	1.64741
RFC3	-2.48666	4.66416e-12	7.34317e-11	17.6328
CCNB1	-2.72274	2.31055e-18	4.8407e-16	32.1332
PSRC1	-3.09643	1.95592e-17	2.3553e-15	29.8706
NOTCH2	-1.05906	2.02655e-10	2.10147e-09	13.4889
LDHA	-1.3557	3.21389e-12	5.32819e-11	17.6338
EMP1	-1.99176	8.95307e-18	1.26636e-15	30.7638
DDB2	-1.07031	6.10032e-09	4.4249e-08	10.3129
YARS1	-1.12313	3.60652e-11	4.53282e-10	15.2734
CDCA8	-2.67198	4.83149e-18	8.04736e-16	31.3873
SLC37A2	-2.11696	2.65598e-17	2.92191e-15	29.6739
WDR36	-1.13865	4.41537e-12	7.00718e-11	17.4248
CTSL	-1.0783	2.53761e-08	1.58352e-07	8.67222
PSAT1	-1.75153	9.10584e-14	2.43515e-12	21.5163
ADAM19	-3.22833	1.93756e-22	1.19733e-18	41.3874
RNFT2	-1.63337	5.09394e-08	2.96196e-07	8.47452
NT5E	-2.66128	1.04959e-17	1.41614e-15	30.5809
TROAP	-2.17267	1.91172e-18	4.25882e-16	32.3249
B4GALNT1	-1.37123	3.22248e-06	1.27342e-05	4.26312
ESPL1	-2.82246	7.13631e-20	3.85404e-17	35.5553
CPM	-2.12355	1.03681e-12	2.00629e-11	19.1564
MPHOSPH6	-1.17887	3.63624e-06	1.42085e-05	4.1249
URB2	-2.02247	2.40646e-15	1.18475e-13	25.2164
SCEL	-1.84414	2.6459e-12	4.53853e-11	18.0474
BRIP1	-1.62932	3.60839e-10	3.50647e-09	13.2469
TRA2B	-1.23093	6.03819e-13	1.24696e-11	19.4388
GALNT5	-2.21658	6.13994e-15	2.46348e-13	24.1341
ODF2	-1.52121	1.8921e-13	4.59413e-12	20.7638
SMC2	-1.66341	3.96601e-14	1.19194e-12	22.2962
SLC31A2	-1.41696	3.02827e-06	1.20765e-05	4.47793
DSCC1	-2.74382	5.23406e-14	1.51924e-12	22.0976
MYC	-1.11869	3.13915e-12	5.2286e-11	17.7136
POLR1E	-1.73488	1.80356e-13	4.4092e-12	20.8846
ARHGEF39	-1.87336	2.22601e-13	5.25684e-12	20.7137
TINAG	-2.73807	2.643e-12	4.53853e-11	18.2442
HMGA1	-1.68069	3.63815e-18	6.68445e-16	31.633
TCF19	-2.53953	1.41128e-14	5.03037e-13	23.4621
IER3	-1.94133	1.74424e-15	9.19698e-14	25.3968
NRM	-1.74502	2.02993e-14	6.88865e-13	23.0527
KIF23	-2.73068	8.4622e-18	1.24501e-15	30.8437
KNL1	-2.66155	2.27151e-16	1.70096e-14	27.5675
PAQR5	-1.51229	1.27717e-08	8.6088e-08	9.48236
TUBGCP4	-1.62855	5.50886e-14	1.58353e-12	22.0501
ARHGAP29	-1.28843	2.53576e-12	4.37486e-11	18.0372
SELENOI	-1.32821	4.02427e-14	1.20742e-12	22.2172
ADCY3	-2.1431	2.22282e-18	4.77291e-16	32.1754
PNPT1	-1.13181	2.31003e-12	4.02831e-11	18.1168
SLC5A6	-1.97947	1.23274e-17	1.61544e-15	30.4522
CENPO	-1.64628	1.82545e-13	4.4505e-12	20.8462
MFSD13A	-1.37543	8.49673e-09	5.95707e-08	10.1362
KIF11	-2.34648	2.66728e-16	1.96431e-14	27.3852
CEP55	-2.16273	3.51172e-15	1.58445e-13	24.787
KIF20B	-2.19036	2.38799e-15	1.18475e-13	25.1863
ADAMTS14	-3.22452	1.56788e-11	2.14449e-10	16.3731
DNA2	-2.51089	1.79788e-13	4.4074e-12	20.9356
WDR12	-1.5233	6.69356e-15	2.64507e-13	24.1023
MNS1	-1.82311	2.24278e-05	7.5431e-05	2.7337
SEMA7A	-2.59781	2.94418e-13	6.68987e-12	20.4281
ZGRF1	-2.04147	2.54188e-10	2.57834e-09	13.7437
GPAT3	-3.71751	4.21608e-21	7.0589e-18	38.3647
BMPR1B	-1.65817	2.04727e-09	1.6615e-08	11.6791
CENPE	-2.7325	2.33588e-18	4.8407e-16	32.1216
ALG10	-1.40071	6.57369e-09	4.72595e-08	10.3136
LRIG3	-1.79964	4.36118e-10	4.14754e-09	13.2197
PHLDA1	-2.80828	2.68731e-22	1.19733e-18	41.1198
DUSP6	-2.21541	3.02791e-14	9.65355e-13	22.613
SNRPF	-1.32142	8.56693e-11	9.7809e-10	14.5003
GAS2L3	-1.02983	3.29881e-06	1.29967e-05	4.04204
SLC7A1	-1.61159	4.4123e-16	2.93418e-14	26.8019
BRCA2	-2.1175	1.24874e-13	3.19755e-12	21.2939
ITGB7	-1.09593	5.45152e-05	0.000169263	1.62113
ESYT1	-1.17187	5.61232e-12	8.62265e-11	17.0913
DIAPH3	-2.51339	1.09829e-11	1.5609e-10	16.8692
PIF1	-2.52802	4.4465e-15	1.8868e-13	24.5749
FANCI	-2.68484	1.26572e-17	1.64655e-15	30.4434
TICRR	-3.13282	1.05437e-15	6.06988e-14	25.9601
WRAP53	-1.47306	8.92967e-12	1.29597e-10	16.9525
DUS3L	-1.40595	3.50197e-12	5.74168e-11	17.8726
URB1	-1.56656	9.44638e-16	5.59314e-14	26.0806
EMP3	-1.08413	2.03826e-06	8.43609e-06	4.7073
PADI1	-1.81289	2.19288e-05	7.39201e-05	2.72827
EPHA2	-2.26039	1.70129e-18	3.83802e-16	32.4142
PLK4	-1.88796	5.71338e-14	1.63441e-12	22.0605
KIF2C	-2.98265	1.63722e-19	7.88608e-17	34.6937
ITGA10	-1.74609	6.09261e-06	2.28113e-05	3.92932
NUF2	-2.59994	2.91363e-14	9.40701e-13	22.7318
RGS16	-2.75174	5.13392e-06	1.94923e-05	4.11334
ANP32E	-1.23974	5.17229e-09	3.81384e-08	10.2372
DTL	-3.39011	1.0584e-14	3.93795e-13	23.7446
TAF1A	-1.23213	3.79861e-07	1.84064e-06	6.41654
CEP170	-1.29468	4.04408e-11	5.01208e-10	15.3209
LBR	-1.23569	1.66801e-11	2.27099e-10	15.9766
CHAC2	-1.86986	2.04687e-08	1.31011e-07	9.44437
TEX261	-1.10475	3.86883e-11	4.81496e-10	15.2136
SLC20A1	-1.90583	2.65261e-16	1.96161e-14	27.3208
POLR2D	-1.03916	6.73068e-09	4.82325e-08	10.0664
CDCA7	-3.20021	3.0981e-18	6.02843e-16	31.6972
HSPD1	-2.14256	5.85325e-19	1.8628e-16	33.4875
CCDC150	-1.85135	2.97776e-06	1.18963e-05	4.56439
FANCD2	-2.18562	1.63735e-15	8.76302e-14	25.5871
POMGNT2	-1.5874	9.5956e-14	2.54105e-12	21.5044
MYH15	-3.52447	5.15208e-13	1.0905e-11	19.8554
NCEH1	-1.95575	9.45459e-19	2.44203e-16	33.0108
MANF	-1.19094	8.61724e-11	9.83204e-10	14.3907
TM4SF19	-4.05373	4.26323e-06	1.64209e-05	4.05326
LYAR	-2.26947	6.31732e-14	1.78144e-12	21.9533
AFG2A	-1.35728	9.55368e-10	8.41649e-09	12.3184
CCNA2	-2.45681	4.15029e-15	1.78663e-13	24.6554
NAF1	-1.48078	4.74756e-11	5.7755e-10	15.3133
SKP2	-1.60871	1.91063e-11	2.5641e-10	16.1625
PLK2	-1.06779	1.27964e-07	6.80567e-07	7.0611
DOK3	-1.44062	2.41786e-06	9.85943e-06	4.72395
PRIM2	-1.48051	6.0091e-11	7.1301e-10	15.0353
MMS22L	-1.59829	1.19714e-13	3.08762e-12	21.277
SLC18B1	-1.28326	2.45808e-12	4.25319e-11	18.1653
MTFR2	-2.73072	1.3089e-11	1.82101e-10	16.6708
EGFR	-1.46405	3.34481e-13	7.42357e-12	19.9664
CDCA5	-2.66405	3.61674e-18	6.68445e-16	31.6769
TMEM209	-1.58632	1.37458e-13	3.46995e-12	21.0005
NCAPG2	-2.48878	7.98965e-19	2.15745e-16	33.1968
PRPS1	-1.88466	5.30595e-15	2.16775e-13	24.4084
GINS4	-2.81243	9.37606e-15	3.56725e-13	23.8424
SIGMAR1	-2.08037	8.5249e-18	1.24501e-15	30.7975
CEP78	-1.60164	4.65546e-12	7.33595e-11	17.631
NOTCH1	-1.97063	2.71301e-14	8.82321e-13	22.7079
MKI67	-2.95646	2.43475e-20	2.06629e-17	36.6797
TAF5	-1.85163	5.38253e-07	2.51646e-06	6.1929
PPRC1	-1.69405	2.54272e-15	1.23408e-13	25.0786
ITPRIP	-2.38686	7.53396e-13	1.51718e-11	19.5145
PDCD11	-1.56749	9.67014e-16	5.70666e-14	26.0108
ZNF215	-1.27768	4.02237e-08	2.40478e-07	8.59042
GLB1L2	-1.4729	1.06648e-13	2.79923e-12	21.2727
TMEM138	-1.9959	3.05711e-16	2.17935e-14	27.2578
INCENP	-2.12592	3.91651e-15	1.7058e-13	24.6543
CCDC15	-1.79069	1.01274e-07	5.51455e-07	7.86458
CHEK1	-1.22811	2.75075e-10	2.75724e-09	13.2826
DSN1	-1.5782	1.90073e-13	4.60881e-12	20.7742
HIRIP3	-1.7441	7.43746e-14	2.03924e-12	21.7875
HMGA2	-2.30717	1.16282e-15	6.53749e-14	25.8626
ITGB1	-1.20762	1.0607e-12	2.04725e-11	18.7636
VEGFC	-4.95343	1.03469e-09	9.0084e-09	11.7783
PRSS53	-1.12737	0.000280947	0.000754073	0.153421
NOCT	-2.31815	1.59149e-08	1.0474e-07	9.72722
ABTB3	-1.77551	4.35173e-15	1.85542e-13	24.5968
GXYLT1	-1.36158	3.46949e-12	5.69892e-11	17.7497
TEX30	-1.16279	9.91336e-05	0.000291352	1.13248
NCAPD3	-2.34052	5.38572e-19	1.74517e-16	33.5901
CENPU	-1.89162	2.79906e-12	4.7374e-11	18.1477
SACS	-1.60183	1.2042e-11	1.68724e-10	16.5549
SPC25	-2.77513	4.31101e-12	6.87216e-11	17.7889
HOMER1	-1.70301	1.8564e-09	1.51626e-08	11.7549
ANKRD22	-1.43497	2.29001e-13	5.39848e-12	20.528
PRDM8	-1.17164	4.99641e-09	3.69332e-08	10.4994
CENPH	-1.76451	1.75108e-10	1.84552e-09	14.0931
LPCAT1	-1.99729	1.51676e-15	8.16665e-14	25.5819
CMTM7	-1.20282	2.01713e-12	3.58418e-11	18.2323
UBASH3B	-2.72619	1.95886e-15	1.00031e-13	25.3954
SKA1	-2.56997	3.01165e-11	3.85586e-10	15.8744
EME1	-2.57686	4.99683e-13	1.06045e-11	19.875
KLF10	-1.33017	3.8e-07	1.84081e-06	5.9835
AGPAT5	-1.86003	8.75975e-18	1.24893e-15	30.7842
NUP205	-1.95277	8.37856e-18	1.24436e-15	30.8267
CCT8	-1.38759	1.72411e-13	4.24674e-12	20.7033
PTDSS1	-1.99164	6.31776e-19	1.96562e-16	33.4279
PABIR2	-1.23893	6.4124e-12	9.66034e-11	16.9881
TBC1D31	-1.31743	5.36854e-09	3.94224e-08	10.575
ATAD2	-2.39195	2.33238e-17	2.6646e-15	29.8105
FRRS1	-1.38704	1.04097e-11	1.48536e-10	16.6289
SASS6	-1.37792	7.27034e-10	6.57059e-09	12.581
BUB1B	-2.62017	4.82201e-19	1.65265e-16	33.6767
NRG1	-4.93982	3.68454e-07	1.78975e-06	6.09863
LRP8	-2.94251	8.59253e-18	1.24501e-15	30.8294
CCNB2	-2.1938	2.19162e-16	1.653e-14	27.5969
DUSP2	-2.66186	2.21253e-11	2.93172e-10	16.1027
CDC25C	-2.07863	7.97758e-12	1.17281e-10	17.1529
SLC45A3	-2.16587	1.51014e-15	8.1557e-14	25.6817
GART	-1.57319	2.17976e-16	1.653e-14	27.5187
RUNX1	-1.1425	6.89738e-12	1.03125e-10	17.0157
CHAF1B	-2.29208	1.25395e-13	3.2063e-12	21.2877
WDR4	-1.61509	7.36983e-12	1.09546e-10	17.1706
C21orf58	-1.61606	4.93806e-07	2.32636e-06	6.10061
TONSL	-2.24841	5.27267e-19	1.74018e-16	33.6014
RECQL4	-2.56184	2.142e-19	9.31089e-17	34.4956
MPP3	-1.3519	5.06797e-08	2.94782e-07	8.39002
DBF4B	-1.85916	6.80522e-13	1.38926e-11	19.5943
RACGAP1	-2.14065	1.146e-18	2.75999e-16	32.8342
SPC24	-2.45084	6.34599e-13	1.30448e-11	19.6848
SNRNP25	-1.27655	7.56963e-09	5.35979e-08	10.1775
WDR90	-1.6574	3.88088e-14	1.17628e-12	22.361
CCNF	-2.42205	8.23703e-16	4.94277e-14	26.2869
PAQR4	-1.73776	5.62672e-16	3.64652e-14	26.5847
CLPB	-1.29959	4.38019e-12	6.96997e-11	17.5247
NEU3	-1.29689	2.93265e-10	2.91499e-09	13.4028
CCDC138	-1.21983	4.45749e-08	2.63313e-07	8.47398
BOLA3	-1.0904	0.000160919	0.00045443	0.518784
ANTXR2	-1.51628	3.13716e-13	7.05051e-12	20.1186
POGLUT1	-1.1825	2.63948e-11	3.42365e-10	15.7601
CIP2A	-2.98179	5.65574e-16	3.65205e-14	26.6174
SGO2	-2.32678	1.57911e-14	5.52906e-13	23.3407
SERPINI1	-1.08879	6.47555e-05	0.000198124	1.4935
TM4SF18	-1.51122	5.7623e-12	8.80752e-11	17.1233
KIF15	-3.0576	1.01914e-15	5.93565e-14	26.0211
WDR43	-1.34967	5.11517e-14	1.48959e-12	22.0028
TMEM41A	-1.38902	1.05023e-14	3.9215e-13	23.5955
RFC4	-1.68109	3.27214e-15	1.49913e-13	24.8624
RFT1	-1.79377	1.76342e-14	6.05543e-13	23.1872
H2AZ1	-1.72488	1.1068e-15	6.30204e-14	25.8821
CDC25A	-2.84736	3.26224e-12	5.40332e-11	18.0604
ATRIP	-1.90724	4.21783e-09	3.17576e-08	10.956
MON1A	-1.5032	1.05133e-08	7.22872e-08	9.98021
MST1R	-1.2895	3.23186e-13	7.24506e-12	20.0419
DUSP7	-1.2708	1.06011e-09	9.21172e-09	12.0119
HMGB2	-1.59911	3.80593e-13	8.26178e-12	19.9468
MAD2L1	-2.6027	3.49747e-14	1.07926e-12	22.5559
ABCE1	-1.23336	4.70981e-11	5.73741e-10	15.0007
ITGA2	-1.47515	2.74064e-10	2.74866e-09	13.1083
ARSK	-1.23055	2.42005e-06	9.86508e-06	4.44432
TERT	-4.7334	6.32459e-07	2.90657e-06	5.75999
FOXQ1	-1.40978	3.09784e-13	6.98857e-12	20.2318
DCBLD1	-1.58806	5.09338e-12	7.94176e-11	17.4095
STK17A	-1.48192	2.10859e-12	3.72361e-11	18.3496
PTTG1	-2.10998	2.95948e-14	9.50341e-13	22.6548
STEAP1	-1.79258	3.76716e-16	2.54341e-14	26.9588
FABP5	-2.31607	3.72455e-06	1.45281e-05	4.44666
DLC1	-1.22055	5.87627e-06	2.20477e-05	3.69946
CSMD3	-2.68588	1.18386e-05	4.19043e-05	3.38113
LETM2	-2.10074	2.17178e-13	5.147e-12	20.742
ZNF367	-2.4231	3.0211e-12	5.07465e-11	18.1183
NOL6	-1.69883	3.66612e-15	1.62128e-13	24.6847
AQP3	-1.72728	4.96402e-15	2.06221e-13	24.2904
MELK	-2.34662	2.30611e-18	4.8407e-16	32.1343
CLDN2	-1.69942	5.94096e-05	0.000183088	1.81144
SKA3	-3.07452	2.08111e-14	7.01125e-13	23.0354
DDIAS	-3.62065	2.38922e-15	1.18475e-13	24.9792
LRR1	-1.59042	1.73622e-10	1.83394e-09	13.9848
QSOX2	-1.57533	7.21519e-16	4.41887e-14	26.3291
ZMYND19	-1.2734	5.65347e-10	5.22594e-09	12.6759
DDX21	-1.33041	9.12854e-14	2.43546e-12	21.3516
METTL3	-1.54722	6.8232e-15	2.69033e-13	24.0732
E2F7	-2.87459	5.12966e-14	1.49137e-12	22.156
NOLC1	-2.04022	1.38687e-17	1.79108e-15	30.3077
CCT2	-1.43858	1.1563e-15	6.52138e-14	25.8036
MCM7	-2.10462	5.71219e-20	3.39342e-17	35.8272
HSP90B1	-1.33229	1.31293e-14	4.71756e-13	23.2733
MMP10	-3.19792	4.50982e-06	1.72884e-05	4.0887
SAAL1	-1.2187	5.04822e-09	3.72698e-08	10.5444
NAV2	-3.1033	2.62912e-07	1.31323e-06	6.90961
C18orf54	-1.32492	3.95911e-07	1.91114e-06	6.42017
PLK1	-2.82291	3.81209e-19	1.35878e-16	33.9317
NEMP1	-2.50329	5.59786e-18	8.98784e-16	31.2568
SLC27A4	-1.84552	9.57675e-14	2.53983e-12	21.3577
DUS2	-1.22778	1.57148e-08	1.03538e-07	9.53733
RRM1	-2.21061	2.74294e-16	2.01172e-14	27.3302
SMG8	-1.00412	1.38536e-09	1.16793e-08	11.7222
CDT1	-2.36633	7.84738e-16	4.757e-14	26.3351
TUBA1C	-1.68882	1.13371e-14	4.16596e-13	23.4481
AXL	-3.24426	1.85645e-17	2.25072e-15	29.8925
CHAF1A	-2.22972	1.43721e-16	1.18584e-14	28.0225
TSR1	-1.68124	3.56528e-16	2.4533e-14	27.0447
CD320	-2.41521	3.37884e-19	1.28123e-16	34.0534
TK1	-1.64087	4.38067e-13	9.42902e-12	19.8231
PBK	-2.91879	1.68688e-13	4.16394e-12	21.0004
MFSD2A	-3.93487	8.80228e-12	1.2804e-10	16.7276
DTYMK	-1.85141	8.77487e-16	5.21285e-14	26.1882
FEN1	-3.04302	1.03916e-16	9.12309e-15	28.3446
IL7R	-2.44185	0.000102631	0.000300638	1.37651
LCMT2	-1.35602	1.55313e-09	1.29104e-08	11.7858
MAT2A	-1.63938	8.50668e-16	5.08745e-14	26.0938
RAB3B	-1.59216	2.62969e-09	2.07281e-08	11.2896
CKAP2L	-2.8528	1.08372e-12	2.07902e-11	19.1541
BUB1	-2.91577	4.439e-18	7.53446e-16	31.4879
CHRNA5	-1.84523	1.52249e-14	5.36242e-13	23.3678
FASN	-1.31409	3.35478e-10	3.28511e-09	12.8794
WNT10B	-2.70623	1.00645e-08	6.94424e-08	10.1707
TM4SF1	-1.70939	1.09595e-13	2.85973e-12	21.1105
IFFO2	-1.86919	1.88417e-16	1.48582e-14	27.7489
TMEM154	-1.29493	1.8852e-13	4.58364e-12	20.6613
ADRA1B	-3.13523	9.46585e-10	8.34798e-09	12.3543
CDK1	-2.68316	1.72335e-17	2.16351e-15	30.1328
LONRF2	-3.0368	2.8557e-10	2.84644e-09	13.5772
PA2G4	-1.85003	2.00703e-16	1.56198e-14	27.5979
ELOVL6	-1.76369	2.39294e-14	7.883e-13	22.8369
TMC7	-1.05057	3.74849e-09	2.85839e-08	10.5973
ARL6IP1	-1.34123	4.61152e-15	1.93836e-13	24.3774
POLH	-1.39924	1.37307e-10	1.47885e-09	14.2347
CDCA4	-2.14449	2.04759e-15	1.03671e-13	25.3661
HAS2	-1.96421	4.40506e-11	5.4031e-10	15.4984
NETO2	-1.82538	2.01515e-17	2.39468e-15	29.9576
SHCBP1	-2.90541	6.79233e-16	4.21662e-14	26.4396
CHST11	-2.65592	3.30867e-14	1.0327e-12	22.6169
ESCO2	-2.69982	2.32157e-14	7.71921e-13	22.9676
CTPS1	-2.2656	4.93197e-16	3.25547e-14	26.7467
RRM2	-3.30986	2.57214e-18	5.20917e-16	32.0287
PRNP	-1.84771	5.29498e-18	8.73769e-16	31.2866
SCG2	-2.06495	0.000127617	0.000366896	1.16247
THOP1	-2.23526	3.784e-19	1.35878e-16	33.9339
CALB2	-2.56562	1.19147e-14	4.35131e-13	23.6272
MTBP	-2.0695	2.90974e-12	4.91074e-11	18.1654
C5orf34	-2.46024	4.15429e-12	6.65209e-11	17.7797
POP7	-1.47737	8.3738e-13	1.66189e-11	19.2471
NIPAL4	-2.04738	2.17422e-05	7.33188e-05	2.80938
MYEOV	-3.223	5.67779e-20	3.39342e-17	35.748
MIR4435-2HG	-1.73469	1.27552e-10	1.38781e-09	14.4124
HPSE	-1.43361	2.03452e-12	3.60789e-11	18.3401
NOC3L	-1.64296	2.16616e-13	5.14052e-12	20.6709
VANGL1	-1.58051	3.10891e-14	9.82394e-13	22.5348
TNFRSF10D	-2.26985	1.20727e-17	1.59378e-15	30.4891
SLC19A1	-2.44182	1.57519e-19	7.81224e-17	34.8019
DPY19L1	-1.17801	1.68244e-13	4.15873e-12	20.684
EXO1	-3.29269	1.83608e-15	9.56799e-14	25.3493
ATP2A2	-1.11059	1.13088e-12	2.15556e-11	18.7074
ZWILCH	-1.53301	1.14587e-11	1.61309e-10	16.6744
GOLT1A	-1.94003	1.24017e-12	2.34881e-11	18.9245
CEP135	-1.29395	5.09877e-08	2.96339e-07	8.41237
UBE2C	-2.74803	3.13512e-20	2.35794e-17	36.3997
CKAP5	-1.61345	1.38796e-15	7.65828e-14	25.63
CCNE2	-2.94152	1.45481e-11	2.00214e-10	16.5841
CLCF1	-1.80163	1.9153e-13	4.63154e-12	20.8419
P2RY2	-1.42601	1.32867e-12	2.48996e-11	18.6955
FOSL1	-3.81995	8.62509e-21	1.02478e-17	37.3459
SUGCT	-3.30058	0.000300407	0.000800996	0.256902
SFN	-1.00626	1.59588e-07	8.32116e-07	6.93115
TUBB6	-1.66146	5.85558e-12	8.91189e-11	17.3783
SPHK1	-1.47521	1.48933e-08	9.87457e-08	9.64575
ATAD5	-2.5351	4.05285e-14	1.21395e-12	22.4124
RIMS2	-3.24652	8.42856e-15	3.24588e-13	23.7969
LMNB2	-1.9929	2.58507e-17	2.86156e-15	29.6797
FOXL1	-2.15165	2.47585e-15	1.21555e-13	25.187
IRX5	-1.20667	0.000216401	0.000594893	0.46489
TYMS	-2.6625	1.79137e-15	9.38995e-14	25.5083
POLE	-1.77913	5.40323e-18	8.83452e-16	31.2744
PUS1	-1.30658	9.26682e-13	1.81487e-11	19.1331
ZBED2	-1.46293	4.05106e-12	6.50739e-11	17.6958
HASPIN	-2.70026	2.38667e-11	3.13682e-10	16.0987
IMPDH2	-1.87166	1.88747e-07	9.70249e-07	7.29108
POGLUT3	-2.10983	9.11083e-17	8.32683e-15	28.4541
THBD	-4.53188	1.25406e-21	3.72499e-18	39.3071
PFAS	-1.78455	6.19787e-16	3.90312e-14	26.503
AURKB	-2.95043	7.02194e-18	1.06962e-15	30.9645
RRS1	-1.75585	4.00389e-12	6.4402e-11	17.6737
HES7	-1.95331	3.42981e-05	0.000110856	2.31497
ALOXE3	-1.47247	0.000144164	0.000410168	0.941548
LDLRAD3	-1.61105	1.21535e-09	1.04134e-08	12.1519
ARID3B	-1.46274	2.22937e-06	9.15479e-06	4.76156
GEMIN4	-1.84593	1.19615e-16	1.03989e-14	28.1898
FJX1	-2.91925	2.15769e-17	2.49704e-15	29.8289
PLD6	-2.85265	2.04369e-11	2.72014e-10	16.2419
RCC1	-1.45799	5.67076e-14	1.62483e-12	21.8622
MCFD2	-1.54976	9.46901e-17	8.56633e-15	28.3631
TMEM64	-1.277	3.06033e-09	2.38067e-08	11.0313
ARSJ	-1.52825	5.56372e-13	1.15973e-11	19.714
OXTR	-1.54416	2.76832e-13	6.31715e-12	20.2673
AEN	-1.87853	7.97636e-12	1.17281e-10	16.9813
DDN	-3.31302	3.07799e-11	3.92388e-10	15.6063
FANCB	-2.6944	4.00133e-11	4.96599e-10	15.5809
PHLDA2	-1.74568	2.37491e-12	4.1213e-11	18.1544
GINS3	-2.18206	1.28636e-10	1.3962e-09	14.4073
FIGN	-1.23774	1.45794e-05	5.06103e-05	2.97582
AP1S2	-1.06047	3.51759e-07	1.71614e-06	6.09659
KPNA2	-2.27263	6.75795e-18	1.04731e-15	31.0428
MAGEB17	-2.07034	7.56351e-05	0.000227813	1.65601
LCK	-1.36055	3.36711e-07	1.64859e-06	6.48248
SF3A3	-1.25993	4.12918e-14	1.23267e-12	22.2108
ALYREF	-1.87173	1.67895e-15	8.932e-14	25.5178
TRAIP	-1.87589	3.28527e-10	3.2259e-09	13.5135
GPR39	-1.56132	4.63663e-14	1.37038e-12	22.1284
KIRREL1	-1.09878	1.18653e-10	1.30211e-09	13.9873
IQGAP3	-2.24628	4.73766e-15	1.97739e-13	24.4391
CMSS1	-1.72915	1.24223e-09	1.06233e-08	12.1664
KNTC1	-2.24579	1.26885e-15	7.06668e-14	25.7915
GAST	-1.57479	9.19958e-05	0.000272077	1.37181
PDE4B	-2.22951	3.13504e-12	5.2286e-11	18.1038
CDCA2	-2.86707	1.88122e-19	8.8229e-17	34.55
BRI3BP	-2.29103	2.02894e-17	2.39468e-15	29.9507
FLRT2	-1.42059	1.23035e-08	8.32388e-08	9.81043
NOMO2	-1.06068	8.51963e-08	4.71104e-07	7.53201
PARPBP	-1.68177	1.50833e-10	1.61159e-09	14.1675
MYBL1	-3.24944	1.81926e-11	2.45814e-10	16.3087
MOSMO	-1.1878	8.25207e-10	7.37185e-09	12.2671
KIF18B	-3.33257	1.08704e-18	2.69073e-16	32.7483
SAPCD2	-2.68637	1.32718e-18	3.09358e-16	32.6881
MTARC1	-2.29369	3.81994e-11	4.76405e-10	15.6299
TOR3A	-2.23843	3.07279e-17	3.299e-15	29.5501
KIF24	-1.72329	2.13567e-09	1.7246e-08	11.646
ERCC6L	-3.45579	3.42606e-15	1.55367e-13	24.7346
NPSR1	-1.58801	7.68706e-13	1.54156e-11	19.3285
SPRY4	-2.05731	2.52251e-17	2.80977e-15	29.7503
FANCA	-2.68485	1.30367e-18	3.09358e-16	32.6182
FANCM	-1.69733	5.79193e-11	6.89998e-10	15.1019
PEAR1	-1.94365	1.91599e-11	2.56936e-10	16.1048
EIF4EBP1	-1.09496	1.35941e-10	1.46566e-09	14.0578
ARL4C	-2.21771	1.18792e-14	4.34725e-13	23.6002
WNT7B	-1.55122	1.27865e-16	1.09034e-14	28.0598
TUBB4B	-2.09191	1.65469e-16	1.32837e-14	27.7689
CENPP	-2.26473	1.95712e-08	1.25874e-07	9.5257
H2AX	-2.44566	8.18481e-18	1.2258e-15	30.8654
FAM72B	-2.82692	1.01649e-07	5.53127e-07	7.86668
PARVB	-2.3144	9.10332e-08	5.00276e-07	8.03577
TMEM201	-3.30731	1.57805e-19	7.81224e-17	34.6118
GJB3	-1.56673	2.12092e-13	5.05335e-12	20.5326
CGB5	-2.70015	6.57529e-13	1.34695e-11	19.6228
FAM111B	-2.90965	6.91018e-15	2.71862e-13	24.1597
JPT1	-1.24409	5.48045e-11	6.57728e-10	14.8079
GJB5	-1.14821	1.36476e-06	5.85528e-06	5.15532
SH2D5	-1.70913	1.91113e-08	1.23183e-07	9.48614
TUBB	-1.65731	2.35542e-16	1.75641e-14	27.3923
IARS1	-1.11437	4.6818e-13	1.00167e-11	19.6803
FUT4	-1.62468	1.00339e-14	3.78866e-13	23.7045
XRCC2	-3.49974	3.21109e-15	1.48259e-13	24.7254
MMP1	-3.77744	3.04511e-19	1.206e-16	33.8037
SNHG17	-1.9175	1.48173e-14	5.22919e-13	23.3453
ADA	-1.06033	9.42527e-06	3.40448e-05	3.32438
FLNA	-1.97069	1.94248e-15	9.98993e-14	25.2265
ACSL5	-1.50225	2.66213e-14	8.70541e-13	22.5576
BLM	-3.13408	2.5665e-15	1.23533e-13	25.051
ZNF860	-1.172	1.70519e-05	5.84872e-05	2.77785
MCMBP	-1.34066	6.77558e-14	1.88384e-12	21.6906
ATAD3A	-1.83444	2.83675e-15	1.34432e-13	25.024
SNHG12	-1.48774	2.58273e-12	4.443e-11	18.1973
MAK16	-1.32331	1.1658e-09	1.00372e-08	12.012
PRIM1	-2.20768	1.77533e-12	3.20566e-11	18.6463
ZNF485	-1.11952	1.38837e-05	4.84313e-05	2.84345
ASPH	-2.30534	4.94477e-20	3.26391e-17	35.9673
WDHD1	-2.84899	1.9629e-16	1.53433e-14	27.7114
MT-ND6	-1.66661	2.42375e-13	5.66134e-12	20.335
ARHGAP11A	-2.60424	5.09281e-15	2.10102e-13	24.4697
TOP1	-1.63342	2.90392e-16	2.09541e-14	27.2102
PRC1	-2.42044	2.55365e-12	4.39722e-11	18.2908
SNORA33	-2.00852	3.60702e-05	0.000115974	2.32468
IQANK1	-1.13143	5.43585e-12	8.38042e-11	17.2945
CENPW	-1.98613	3.48543e-11	4.40236e-10	15.7249
MICB	-2.19434	1.33116e-06	5.71521e-06	5.45086
MICA	-1.44478	1.14118e-11	1.60902e-10	16.5965
FAM216A	-1.98535	8.7969e-08	4.84631e-07	8.02791
SLC35B4	-1.86746	4.87432e-14	1.42878e-12	22.1767
C4orf46	-1.52919	4.08812e-08	2.44e-07	8.65602
KRT6A	-3.1351	8.3169e-07	3.74302e-06	5.72005
ONECUT3	-1.42095	2.13373e-12	3.76136e-11	18.2448
PRR22	-1.44413	6.82793e-06	2.53357e-05	3.74095
LINC02693	-1.82937	2.0928e-09	1.69228e-08	11.6319
CGB8	-3.66071	9.5735e-08	5.23532e-07	7.72007
ARHGAP19	-1.66106	1.16352e-09	1.00224e-08	12.1975
HAUS7	-1.58961	9.78424e-05	0.00028789	1.29858
TMX2	-1.70621	6.56785e-16	4.09274e-14	26.3977
EMP2	-1.35146	6.82626e-13	1.39196e-11	19.4067
TSPAN4	-2.329	4.23085e-09	3.18287e-08	10.9996
TUBAP2	-2.11064	0.000110341	0.000320799	1.3011
IFRD2	-1.61497	3.65188e-15	1.619e-13	24.7241
FAM72D	-2.49855	0.000289604	0.000774856	0.430658
SLC12A8	-1.49247	1.71936e-11	2.33199e-10	16.2623
CYTOR	-2.61239	4.12223e-09	3.11562e-08	11.0451
RN7SKP97	-3.34393	8.82966e-07	3.95581e-06	5.68126
LINP1	-1.65362	4.64105e-08	2.72171e-07	8.60576
ENSG00000225339	-1.51499	1.77382e-06	7.43138e-06	5.02878
ELFN1	-2.14881	2.93294e-06	1.17252e-05	4.68295
TMEM185B	-1.73487	2.80721e-17	3.06933e-15	29.5953
ERVMER34-1	-2.50126	1.76302e-16	1.4068e-14	27.8166
SNHG26	-3.06794	1.84216e-09	1.50532e-08	11.7293
ITGB1-DT	-1.20589	4.27841e-05	0.000135579	1.96827
LNCAROD	-1.74038	2.53433e-11	3.30892e-10	15.9285
EVA1A-AS	-3.76848	5.05174e-05	0.000157813	1.73054
COMETT	-3.40382	4.568e-06	1.74927e-05	4.14317
MANCR	-2.15347	1.40354e-07	7.40275e-07	7.58047
LINC-PINT	-2.10024	1.28163e-10	1.39191e-09	14.2553
MYADM-AS2	-1.88952	0.00023816	0.000648826	0.592461
EMSLR	-2.20939	1.26165e-14	4.56087e-13	23.5734
SNHG15	-1.77113	2.35623e-14	7.79084e-13	22.8731
UBE2SP1	-1.79324	8.43867e-06	3.07491e-05	3.68279
MIR155HG	-2.62217	2.2516e-06	9.23546e-06	4.95055
KIAA0040	-2.46876	5.14902e-21	7.0589e-18	38.2146
LDHAP7	-1.37285	3.34234e-08	2.03509e-07	8.86613
PRKG1-AS1	-3.38101	3.63299e-09	2.77409e-08	10.9858
KIFC1	-2.873	1.02029e-20	1.13647e-17	37.4476
MAGEB17-AS1	-2.80194	2.42343e-11	3.1781e-10	15.99
TXNDC5	-1.60246	6.81746e-09	4.88347e-08	10.4095
NME1	-2.26526	5.50853e-14	1.58353e-12	22.0511
LINC00973	-2.32027	3.72105e-12	6.03976e-11	17.9325
SNHG3	-1.98451	2.11802e-14	7.10786e-13	22.9714
PRR7-AS1	-1.94103	2.52596e-08	1.57803e-07	9.27347
MARS2	-2.29059	5.26183e-14	1.52482e-12	22.1568
LUCAT1	-2.33356	3.85813e-07	1.86745e-06	6.54323
PVT1	-1.07517	4.31999e-09	3.23899e-08	10.6235
TMEM158	-4.90022	2.94667e-13	6.68987e-12	19.3432
ENSG00000250657	-6.68682	2.71021e-06	1.09254e-05	4.35021
LINC00589	-2.0736	5.84449e-07	2.70266e-06	6.22422
PRKDC	-1.81197	1.23821e-16	1.06093e-14	28.0603
RTL1	-3.44963	0.00017531	0.000491254	0.597483
MIR100HG	-4.72753	9.2558e-07	4.12186e-06	5.02388
SNHG1	-1.97181	1.87781e-16	1.48582e-14	27.7027
LINC02454	-3.26844	4.24245e-05	0.000134488	2.07443
ENSG00000256433	-1.66669	7.88504e-05	0.000236782	1.52239
ENSG00000256663	-3.98556	4.51099e-11	5.51784e-10	15.0313
PHLDA1-AS1	-3.26473	5.0657e-10	4.7472e-09	13.0205
ENSG00000258077	-1.89964	1.20092e-06	5.22531e-06	5.51873
RTEL1	-1.37371	6.7996e-07	3.10724e-06	5.91734
ENSG00000260196	-1.2849	1.71118e-06	7.18242e-06	4.9956
SNHG19	-1.60459	8.07223e-08	4.48687e-07	8.05124
TBC1D22A-DT	-1.40439	1.07365e-05	3.83688e-05	3.31151
ST3GAL1-DT	-1.60919	0.000188129	0.000523634	0.760036
BOP1	-2.01012	2.50763e-16	1.86212e-14	27.3945
ENSG00000263235	-2.74863	8.2171e-09	5.77921e-08	10.287
SNHG25	-1.67992	3.09996e-09	2.40625e-08	11.2719
SNHG30	-1.70072	3.29545e-06	1.29908e-05	4.50015
ITGB1P1	-1.05549	0.000141729	0.000403884	0.73718
NBPF8	-1.19682	1.40098e-06	6.00198e-06	5.09132
MILR1	-1.19208	2.83464e-10	2.83178e-09	13.4648
POM121C	-1.29853	4.51413e-14	1.33862e-12	22.1312
ENSG00000272622	-2.49329	6.81397e-16	4.21662e-14	26.4559
UHRF1	-3.55605	1.10795e-18	2.70491e-16	32.7503
RDM1	-1.78233	8.52441e-06	3.10298e-05	3.64326
ACACA	-1.20144	4.49361e-13	9.6372e-12	19.7715
ENSG00000279806	-3.29517	9.34455e-07	4.15826e-06	5.61987
ENSG00000280206	-1.83944	9.47856e-08	5.18658e-07	7.90997
SLFNL1-AS1	-1.45377	0.000233028	0.000636186	0.488555
HELLPAR	-1.81778	0.000295451	0.000788372	0.375355
SNHG4	-2.02446	1.06269e-12	2.04725e-11	19.0375
EEF1AKMT4	-1.46517	2.50694e-06	1.0182e-05	4.65982
ENSG00000284946	-1.72724	5.36093e-06	2.02937e-05	4.03045
LINC00941	-2.17955	7.12327e-16	4.38166e-14	26.43
RUNX1-AS1	-2.28293	0.000287104	0.000769093	0.348874
ENSG00000289154	-2.44146	1.19278e-08	8.09821e-08	10.0045
ENSG00000289261	-1.16579	2.17169e-05	7.32472e-05	2.60716
ENSG00000289850	-2.75248	1.15201e-20	1.14062e-17	37.4164
FAM86B3P	-1.06842	0.000104846	0.000306523	0.728706
RPSAP52	-2.789	3.97907e-06	1.54264e-05	4.37307
ENSG00000295821	-1.76343	2.67404e-10	2.69247e-09	13.5983
ENSG00000295873	-2.34269	1.92555e-06	8.00933e-06	5.104
ENSG00000295911	-2.5133	8.75532e-07	3.92744e-06	5.8549
ENSG00000299701	-1.62135	1.53738e-07	8.03732e-07	7.38732
ENSG00000299739	-1.6403	1.13974e-07	6.1145e-07	7.74296
ENSG00000305512	-2.23268	4.47568e-06	1.71724e-05	4.30051
ENSG00000306000	-1.8812	4.42106e-12	7.00998e-11	17.59
ENSG00000307083	-1.34442	2.87707e-08	1.77791e-07	8.36532
ENSG00000308375	-2.71056	6.58358e-06	2.45107e-05	3.8933
ENSG00000308602	-2.05111	1.51432e-06	6.43781e-06	5.31895
ENSG00000309952	-4.37132	1.39187e-06	5.96583e-06	5.11761
ENSG00000310521	-1.81024	0.000109816	0.000319432	1.28214

## Sheet: LKR10 nt-sgRNA RMC vs Veh
gene_id	gene_type	gene_name	level	havana_gene	chr	DB	Type	start	end	strand	logFC	AveExpr	t	P.Value	adj.P.Val	B
ENSMUSG00000045827.11	protein_coding	Serpinb9	2	OTTMUSG00000000696.1	chr13	HAVANA	gene	33187233	33201940	+	3.32938	5.82326	19.7657	4.39042e-15	8.79225e-11	24.3404
ENSMUSG00000026971.16	protein_coding	Itgb6	2	OTTMUSG00000012790.1	chr2	HAVANA	gene	60428636	60552987	-	3.85515	4.80028	18.1283	2.46537e-14	1.64572e-10	22.5397
ENSMUSG00000042842.12	protein_coding	Serpinb6b	2	OTTMUSG00000000698.1	chr13	HAVANA	gene	33149192	33163050	+	3.14136	6.56229	17.7599	3.70457e-14	1.85469e-10	22.4247
ENSMUSG00000028716.16	protein_coding	Pdzk1ip1	2	OTTMUSG00000008589.1	chr4	HAVANA	gene	114945905	114951096	+	4.52129	2.85083	18.4272	1.7811e-14	1.64572e-10	22.2063
ENSMUSG00000003534.18	protein_coding	Ddr1	2	OTTMUSG00000031017.1	chr17	HAVANA	gene	35992459	36015513	-	1.76229	7.66729	17.433	5.35076e-14	2.14309e-10	22.113
ENSMUSG00000039191.13	protein_coding	Rbpj	2	OTTMUSG00000054613.1	chr5	HAVANA	gene	53623494	53814704	+	-1.86323	6.54465	-16.7153	1.22565e-13	4.09083e-10	21.3015
ENSMUSG00000025790.15	protein_coding	Slco3a1	2	OTTMUSG00000024304.1	chr7	HAVANA	gene	73925167	74204528	-	3.60276	4.8848	16.4849	1.60973e-13	4.60522e-10	20.8413
ENSMUSG00000046711.17	protein_coding	Hmga1	2	OTTMUSG00000028935.1	chr17	HAVANA	gene	27775471	27782648	+	-3.18594	6.15251	-16.2269	2.19327e-13	5.49031e-10	20.6898
ENSMUSG00000053897.16	protein_coding	Slc39a8	2	OTTMUSG00000024378.1	chr3	HAVANA	gene	135531040	135594333	+	3.00447	4.82119	15.9397	3.10982e-13	6.9197e-10	20.2206
ENSMUSG00000020836.16	protein_coding	Coro6	2	OTTMUSG00000008182.1	chr11	HAVANA	gene	77353237	77361310	+	3.46425	4.81113	15.4748	5.5365e-13	1.10874e-09	19.6732
ENSMUSG00000024308.16	protein_coding	Tapbp	2	OTTMUSG00000037070.1	chr17	HAVANA	gene	34134873	34148266	+	2.36292	6.76641	15.2631	7.2348e-13	1.31713e-09	19.6002
ENSMUSG00000042594.17	protein_coding	Sh2b3	2	OTTMUSG00000029807.1	chr5	HAVANA	gene	121953551	121975709	-	-1.69397	5.77371	-14.5703	1.77576e-12	2.5401e-09	18.7096
ENSMUSG00000030137.9	protein_coding	Tuba8	2	OTTMUSG00000022202.1	chr6	HAVANA	gene	121187655	121203813	+	-2.85688	2.83475	-14.9953	1.01944e-12	1.70128e-09	18.613
ENSMUSG00000056758.15	protein_coding	Hmga2	2	OTTMUSG00000033206.1	chr10	HAVANA	gene	120197180	120312374	-	-2.92333	6.87353	-14.3385	2.41733e-12	3.22729e-09	18.423
ENSMUSG00000031790.9	protein_coding	Mmp15	2	OTTMUSG00000027464.1	chr8	HAVANA	gene	96078896	96101708	+	4.54358	5.46143	14.2341	2.78087e-12	3.48061e-09	18.2366
ENSMUSG00000027962.15	protein_coding	Vcam1	2	OTTMUSG00000054446.1	chr3	HAVANA	gene	115903598	115923337	-	4.14538	6.95741	13.8941	4.41653e-12	5.20267e-09	17.8308
ENSMUSG00000035818.15	protein_coding	Plekhs1	2	OTTMUSG00000067890.1	chr19	HAVANA	gene	56450072	56475184	+	4.03652	1.85263	14.7326	1.43442e-12	2.20966e-09	17.7207
ENSMUSG00000029381.17	protein_coding	Shroom3	2	OTTMUSG00000036945.1	chr5	HAVANA	gene	92831294	93113177	+	1.79532	6.19813	13.7064	5.72408e-12	6.36836e-09	17.5843
ENSMUSG00000039116.8	protein_coding	Adgrg6	2	OTTMUSG00000059618.1	chr10	HAVANA	gene	14278327	14421403	-	3.61444	6.59248	13.6381	6.29541e-12	6.63537e-09	17.4876
ENSMUSG00000040296.16	protein_coding	Rigi	2	OTTMUSG00000006554.1	chr4	HAVANA	gene	40203773	40239828	-	2.29442	4.19773	13.4936	7.70778e-12	7.7178e-09	17.1916
ENSMUSG00000031626.19	protein_coding	Sorbs2	2	OTTMUSG00000034076.1	chr8	HAVANA	gene	45960825	46280943	+	2.96332	7.73553	13.2764	1.04836e-11	9.69447e-09	16.9937
ENSMUSG00000027175.11	protein_coding	Tcp11l1	2	OTTMUSG00000014956.1	chr2	HAVANA	gene	104487633	104542514	-	1.72941	6.24302	13.2653	1.06501e-11	9.69447e-09	16.9749
ENSMUSG00000025921.8	protein_coding	Rdh10	2	OTTMUSG00000025248.1	chr1	HAVANA	gene	16175998	16203958	+	3.09779	8.31672	13.1758	1.21038e-11	1.05387e-08	16.8529
ENSMUSG00000021458.19	protein_coding	Aopep	2	OTTMUSG00000030849.1	chr13	HAVANA	gene	63112707	63473910	+	1.81911	5.35777	13.0917	1.36594e-11	1.13977e-08	16.7178
ENSMUSG00000015222.19	protein_coding	Map2	2	OTTMUSG00000016448.1	chr1	HAVANA	gene	66214432	66481742	+	2.19408	4.94698	13.0349	1.48261e-11	1.18763e-08	16.6355
ENSMUSG00000021756.13	protein_coding	Il6st	1	OTTMUSG00000044624.1	chr13	HAVANA	gene	112600604	112646620	+	1.65997	7.53297	12.9502	1.6764e-11	1.24339e-08	16.5318
ENSMUSG00000015766.15	protein_coding	Eps8	2	OTTMUSG00000022767.1	chr6	HAVANA	gene	137454243	137631874	-	-1.79849	7.29843	-12.9054	1.7894e-11	1.2798e-08	16.4671
ENSMUSG00000033060.18	protein_coding	Lmo7	2	OTTMUSG00000034688.1	chr14	HAVANA	gene	101967386	102172146	+	1.37794	10.1443	12.828	2.00352e-11	1.35364e-08	16.3559
ENSMUSG00000031628.10	protein_coding	Casp3	2	OTTMUSG00000061297.1	chr8	HAVANA	gene	47070326	47092724	+	-1.44046	7.57283	-12.8198	2.02783e-11	1.35364e-08	16.3439
ENSMUSG00000026576.13	protein_coding	Atp1b1	2	OTTMUSG00000049860.1	chr1	HAVANA	gene	164264678	164285924	-	2.85976	6.17265	12.713	2.37232e-11	1.49711e-08	16.1853
ENSMUSG00000078249.6	protein_coding	Hmga1b	2	OTTMUSG00000004118.1	chr11	HAVANA	gene	120653620	120655245	+	-3.34211	5.24824	-12.7074	2.39226e-11	1.49711e-08	16.1453
ENSMUSG00000038119.16	protein_coding	Cdon	2	OTTMUSG00000030743.1	chr9	HAVANA	gene	35332424	35418948	+	1.59622	4.97275	12.6587	2.57064e-11	1.50832e-08	16.0976
ENSMUSG00000028796.18	protein_coding	Phc2	2	OTTMUSG00000009456.1	chr4	HAVANA	gene	128548495	128646674	+	-1.55685	7.62313	-12.6447	2.62457e-11	1.50832e-08	16.0891
ENSMUSG00000044674.7	protein_coding	Fzd1	2	OTTMUSG00000021313.1	chr5	HAVANA	gene	4803839	4808035	-	1.52332	5.64747	12.6417	2.63614e-11	1.50832e-08	16.0836
ENSMUSG00000030930.15	protein_coding	Chst15	1	OTTMUSG00000023015.1	chr7	HAVANA	gene	131837509	131918957	-	4.02105	2.39983	12.9564	1.66132e-11	1.24339e-08	15.8704
ENSMUSG00000021365.16	protein_coding	Nedd9	2	OTTMUSG00000068550.1	chr13	HAVANA	gene	41463057	41640838	-	1.74369	5.65776	12.3854	3.86534e-11	2.09209e-08	15.7033
ENSMUSG00000028173.11	protein_coding	Wls	2	OTTMUSG00000052834.1	chr3	HAVANA	gene	159545309	159644300	+	1.2521	8.21714	12.2955	4.42663e-11	2.31429e-08	15.5716
ENSMUSG00000034422.15	protein_coding	Parp14	2	OTTMUSG00000027273.1	chr16	HAVANA	gene	35653244	35691914	-	2.18371	4.34921	12.2836	4.507e-11	2.31429e-08	15.5351
ENSMUSG00000021057.16	protein_coding	Akap5	2	OTTMUSG00000016317.1	chr12	HAVANA	gene	76371665	76380927	+	4.54741	2.78627	12.5699	2.93284e-11	1.63147e-08	15.5283
ENSMUSG00000024042.8	protein_coding	Sik1	2	OTTMUSG00000073186.1	chr17	HAVANA	gene	32063224	32074778	-	1.98511	5.59943	12.1248	5.73926e-11	2.87336e-08	15.3153
ENSMUSG00000038235.5	protein_coding	F11r	2	OTTMUSG00000021724.1	chr1	HAVANA	gene	171265103	171292171	+	1.50093	8.21664	12.0791	6.15561e-11	2.94203e-08	15.2447
ENSMUSG00000027351.15	protein_coding	Spred1	2	OTTMUSG00000015239.1	chr2	HAVANA	gene	116951855	117012760	+	-1.73705	6.31464	-12.0776	6.17025e-11	2.94203e-08	15.2447
ENSMUSG00000038375.16	protein_coding	Trp53inp2	2	OTTMUSG00000016061.1	chr2	HAVANA	gene	155222979	155231770	+	3.34233	5.55931	12.0125	6.81874e-11	3.15861e-08	15.1408
ENSMUSG00000029759.10	protein_coding	Pon3	2	OTTMUSG00000024087.1	chr6	HAVANA	gene	5220852	5256286	-	1.37097	6.1025	12.0011	6.93992e-11	3.15861e-08	15.1282
ENSMUSG00000000901.18	protein_coding	Mmp11	2	OTTMUSG00000031859.1	chr10	HAVANA	gene	75759056	75772330	-	2.49331	5.43388	11.9159	7.91711e-11	3.52329e-08	14.9974
ENSMUSG00000121382.1	lncRNA	ENSMUSG00000121382	2	NA	chr11	HAVANA	gene	52045549	52058986	-	2.40019	5.0055	11.7547	1.01775e-10	4.32365e-08	14.7486
ENSMUSG00000022965.9	protein_coding	Ifngr2	2	OTTMUSG00000028337.1	chr16	HAVANA	gene	91343960	91362511	+	2.02661	5.53358	11.73	1.05792e-10	4.32365e-08	14.713
ENSMUSG00000000303.14	protein_coding	Cdh1	2	OTTMUSG00000020588.1	chr8	HAVANA	gene	107329983	107396878	+	1.4461	10.7568	11.6845	1.13618e-10	4.46139e-08	14.6373
ENSMUSG00000032578.8	protein_coding	Cish	2	OTTMUSG00000036835.1	chr9	HAVANA	gene	107173225	107179983	+	2.19462	3.47735	11.7011	1.10697e-10	4.43365e-08	14.6089
ENSMUSG00000026749.12	protein_coding	Nek6	2	OTTMUSG00000012863.1	chr2	HAVANA	gene	38401655	38484618	+	-1.26376	6.01926	-11.5329	1.44388e-10	5.56061e-08	14.404
ENSMUSG00000021127.9	protein_coding	Zfp36l1	2	OTTMUSG00000065546.1	chr12	HAVANA	gene	80154528	80159787	-	2.29494	6.94422	11.4674	1.60253e-10	6.05515e-08	14.2972
ENSMUSG00000008668.16	protein_coding	Rps18	2	OTTMUSG00000037085.1	chr17	HAVANA	gene	34170973	34174975	-	-1.46485	8.35502	-11.2834	2.1529e-10	7.98405e-08	13.9996
ENSMUSG00000039952.16	protein_coding	Dag1	2	OTTMUSG00000050793.1	chr9	HAVANA	gene	108081833	108141157	-	1.44273	9.39687	11.2613	2.23112e-10	8.12373e-08	13.9642
ENSMUSG00000032440.14	protein_coding	Tgfbr2	2	OTTMUSG00000062871.1	chr9	HAVANA	gene	115913361	116004428	-	1.18513	8.8537	11.2386	2.31441e-10	8.25227e-08	13.9273
ENSMUSG00000032643.13	protein_coding	Fhl3	2	OTTMUSG00000009181.1	chr4	HAVANA	gene	124594494	124602404	+	-1.52633	5.76836	-11.2295	2.34884e-10	8.25227e-08	13.9232
ENSMUSG00000047735.15	protein_coding	Samd9l	2	OTTMUSG00000029668.1	chr6	HAVANA	gene	3372257	3399572	-	1.62012	5.5565	11.2154	2.40319e-10	8.29764e-08	13.8999
ENSMUSG00000048965.10	protein_coding	Mrgpre	2	OTTMUSG00000060034.1	chr7	HAVANA	gene	143332100	143338237	-	1.64166	4.16322	11.1756	2.56333e-10	8.54444e-08	13.8367
ENSMUSG00000009621.19	protein_coding	Vav2	2	OTTMUSG00000012034.1	chr2	HAVANA	gene	27152116	27317045	-	1.0481	6.06117	11.1674	2.59803e-10	8.54444e-08	13.8189
ENSMUSG00000002983.19	protein_coding	Relb	2	OTTMUSG00000020490.1	chr7	HAVANA	gene	19340142	19363363	-	2.28601	3.93056	11.1663	2.60267e-10	8.54444e-08	13.786
ENSMUSG00000026405.15	protein_coding	C4bp	2	OTTMUSG00000030002.1	chr1	HAVANA	gene	130562510	130589369	-	3.93716	1.18949	11.7705	9.9282e-11	4.32222e-08	13.5449
ENSMUSG00000016028.12	protein_coding	Celsr1	2	OTTMUSG00000069785.1	chr15	HAVANA	gene	85783130	85918404	-	1.41349	7.60283	10.9757	3.55487e-10	1.13e-07	13.5
ENSMUSG00000029571.15	protein_coding	Tmem106b	2	OTTMUSG00000024096.1	chr6	HAVANA	gene	13069758	13089268	+	1.67104	8.20286	10.9506	3.70501e-10	1.15932e-07	13.4582
ENSMUSG00000040033.18	protein_coding	Stat2	2	OTTMUSG00000064933.1	chr10	HAVANA	gene	128106428	128128718	+	1.46903	4.92149	10.9039	4.00208e-10	1.21864e-07	13.4017
ENSMUSG00000030465.21	protein_coding	Psd3	1	OTTMUSG00000028732.1	chr8	HAVANA	gene	68141734	68664679	-	2.24515	4.70882	10.9018	4.0163e-10	1.21864e-07	13.3986
ENSMUSG00000003948.18	protein_coding	Mmd	2	OTTMUSG00000060262.1	chr11	HAVANA	gene	90140282	90169415	+	-3.1168	6.17333	-10.8816	4.15305e-10	1.24133e-07	13.362
ENSMUSG00000037820.16	protein_coding	Tgm2	2	OTTMUSG00000015888.1	chr2	HAVANA	gene	157958322	157988356	-	2.97619	5.92187	10.8557	4.33492e-10	1.27119e-07	13.321
ENSMUSG00000048706.4	protein_coding	Lurap1l	2	OTTMUSG00000000392.1	chr4	HAVANA	gene	80828883	80873865	+	2.18283	5.85315	10.8495	4.37993e-10	1.27119e-07	13.305
ENSMUSG00000026712.4	protein_coding	Mrc1	2	OTTMUSG00000011409.1	chr2	HAVANA	gene	14234203	14336868	+	-4.48738	3.60554	-10.9868	3.49069e-10	1.12749e-07	13.2929
ENSMUSG00000022246.15	protein_coding	Rai14	2	OTTMUSG00000070281.1	chr15	HAVANA	gene	10569055	10714710	-	-1.45982	7.96993	-10.8182	4.61372e-10	1.31992e-07	13.24
ENSMUSG00000036528.17	protein_coding	Ppfibp2	2	OTTMUSG00000059746.1	chr7	HAVANA	gene	107194414	107347790	+	2.86723	5.23428	10.7946	4.79847e-10	1.35344e-07	13.2235
ENSMUSG00000107881.2	TEC	Gm44250	2	OTTMUSG00000056905.1	chr6	HAVANA	gene	5216258	5220486	-	1.46593	5.97835	10.7692	5.00576e-10	1.38804e-07	13.1677
ENSMUSG00000049225.16	protein_coding	Pdp1	2	OTTMUSG00000004573.1	chr4	HAVANA	gene	11958184	11966452	-	-1.15959	4.53976	-10.7442	5.21984e-10	1.38804e-07	13.1402
ENSMUSG00000020520.15	protein_coding	Galnt10	2	OTTMUSG00000005711.1	chr11	HAVANA	gene	57536268	57678340	+	1.14585	6.55598	10.7524	5.1483e-10	1.38804e-07	13.1345
ENSMUSG00000066152.12	protein_coding	Slc31a2	2	OTTMUSG00000000311.1	chr4	HAVANA	gene	62180799	62216648	+	1.44666	3.99567	10.7392	5.26338e-10	1.38804e-07	13.1311
ENSMUSG00000020607.8	protein_coding	Lratd1	2	OTTMUSG00000065907.1	chr12	HAVANA	gene	14196831	14202055	-	-2.39866	4.81151	-10.7375	5.27852e-10	1.38804e-07	13.1283
ENSMUSG00000029570.6	protein_coding	Lfng	2	OTTMUSG00000054831.1	chr5	HAVANA	gene	140593075	140601300	+	1.4707	4.85161	10.728	5.36297e-10	1.38804e-07	13.1125
ENSMUSG00000019810.16	protein_coding	Fuca2	2	OTTMUSG00000026398.1	chr10	HAVANA	gene	13375284	13394779	+	1.38982	6.14691	10.7198	5.43676e-10	1.38804e-07	13.0827
ENSMUSG00000027508.16	protein_coding	Pag1	2	OTTMUSG00000033869.1	chr3	HAVANA	gene	9752539	9898739	-	1.93323	3.54421	10.7156	5.47566e-10	1.38804e-07	13.0701
ENSMUSG00000029401.9	protein_coding	Rilpl2	2	OTTMUSG00000024444.1	chr5	HAVANA	gene	124601328	124616429	-	-1.18744	5.35795	-10.6429	6.18658e-10	1.52235e-07	12.9673
ENSMUSG00000031284.17	protein_coding	Pak3	1	OTTMUSG00000018957.1	chrX	HAVANA	gene	142301587	142580792	+	2.51501	3.02142	10.6653	5.95711e-10	1.49121e-07	12.9493
ENSMUSG00000027495.5	protein_coding	Fam210b	2	OTTMUSG00000016151.1	chr2	HAVANA	gene	172187485	172197669	+	2.27015	5.60725	10.6312	6.30957e-10	1.52235e-07	12.9477
ENSMUSG00000025582.5	protein_coding	Nptx1	2	OTTMUSG00000003985.1	chr11	HAVANA	gene	119429545	119438579	-	-3.9219	4.27036	-10.6353	6.26548e-10	1.52235e-07	12.9322
ENSMUSG00000042694.18	protein_coding	Stn1	2	OTTMUSG00000043314.1	chr19	HAVANA	gene	47489472	47525946	-	-1.03895	5.73261	-10.597	6.68393e-10	1.58673e-07	12.8844
ENSMUSG00000006519.12	protein_coding	Cyba	2	OTTMUSG00000061846.1	chr8	HAVANA	gene	123151515	123159669	-	1.47349	4.80077	10.592	6.73998e-10	1.58673e-07	12.8836
ENSMUSG00000002997.16	protein_coding	Prkar2b	2	OTTMUSG00000016980.1	chr12	HAVANA	gene	32008475	32111295	-	-1.23303	5.29236	-10.5856	6.81408e-10	1.58673e-07	12.8724
ENSMUSG00000039953.14	protein_coding	Clstn1	2	OTTMUSG00000010265.1	chr4	HAVANA	gene	149670925	149733356	+	1.32046	8.7408	10.5672	7.02876e-10	1.61791e-07	12.8182
ENSMUSG00000019256.18	protein_coding	Ahr	2	OTTMUSG00000036999.1	chr12	HAVANA	gene	35547973	35585037	-	1.53381	5.86203	10.5434	7.31773e-10	1.66528e-07	12.7922
ENSMUSG00000017057.10	protein_coding	Il13ra1	2	OTTMUSG00000017214.1	chrX	HAVANA	gene	35375763	35434912	+	2.08474	4.33807	10.4902	8.00951e-10	1.80223e-07	12.7194
ENSMUSG00000034854.9	protein_coding	Mfsd12	2	OTTMUSG00000030363.1	chr10	HAVANA	gene	81193325	81202059	+	1.30295	4.71669	10.4536	8.52475e-10	1.85562e-07	12.655
ENSMUSG00000038900.18	protein_coding	Rpl12	2	OTTMUSG00000012575.1	chr2	HAVANA	gene	32851571	32855357	+	-1.66154	8.77256	-10.4568	8.47726e-10	1.85562e-07	12.6309
ENSMUSG00000022964.15	protein_coding	Tmem50b	2	OTTMUSG00000019970.1	chr16	HAVANA	gene	91371391	91394688	-	2.19429	4.65595	10.4158	9.09206e-10	1.95782e-07	12.5947
ENSMUSG00000025854.16	protein_coding	Fam20c	2	OTTMUSG00000030351.1	chr5	HAVANA	gene	138740269	138795832	+	2.64185	5.15294	10.3862	9.56466e-10	1.97466e-07	12.5426
ENSMUSG00000022892.12	protein_coding	App	2	OTTMUSG00000069475.1	chr16	HAVANA	gene	84746573	84970654	-	1.19908	10.0781	10.4004	9.33378e-10	1.96756e-07	12.5358
ENSMUSG00000037805.16	protein_coding	Rpl10a	2	OTTMUSG00000023382.1	chr17	HAVANA	gene	28547445	28550007	+	-1.25506	8.1668	-10.4007	9.32906e-10	1.96756e-07	12.5353
ENSMUSG00000031788.15	protein_coding	Kifc3	2	OTTMUSG00000061734.1	chr8	HAVANA	gene	95826456	95929440	-	0.982612	7.26495	10.392	9.46901e-10	1.97466e-07	12.5216
ENSMUSG00000060036.15	protein_coding	Rpl3	2	OTTMUSG00000049399.1	chr15	HAVANA	gene	79961992	79976069	-	-1.24969	8.93602	-10.3574	1.0048e-09	2.05328e-07	12.4606
ENSMUSG00000047989.12	protein_coding	Ino80c	1	OTTMUSG00000033183.1	chr18	HAVANA	gene	24237814	24255010	-	-1.36104	5.4637	-10.33	1.05315e-09	2.13034e-07	12.4374
ENSMUSG00000020019.5	protein_coding	Ntn4	2	OTTMUSG00000027786.1	chr10	HAVANA	gene	93476543	93583069	+	2.93548	4.43368	10.3028	1.10359e-09	2.20684e-07	12.4038
ENSMUSG00000022906.16	protein_coding	Parp9	1	OTTMUSG00000023901.1	chr16	HAVANA	gene	35758840	35792975	+	1.34489	4.62126	10.2966	1.11539e-09	2.20684e-07	12.389
ENSMUSG00000046312.5	protein_coding	Myorg	2	OTTMUSG00000006655.1	chr4	HAVANA	gene	41495604	41503076	-	1.661	3.63855	10.2921	1.12403e-09	2.20684e-07	12.3794
ENSMUSG00000054150.13	protein_coding	Syne3	2	OTTMUSG00000066214.1	chr12	HAVANA	gene	104896192	104976068	-	-1.98214	5.48059	-10.2858	1.13631e-09	2.20918e-07	12.3634
ENSMUSG00000021118.8	protein_coding	Plek2	2	OTTMUSG00000027588.1	chr12	HAVANA	gene	78935465	78953738	-	-1.99985	5.25266	-10.2747	1.15831e-09	2.20918e-07	12.35
ENSMUSG00000004552.17	protein_coding	Ctse	2	OTTMUSG00000022661.1	chr1	HAVANA	gene	131566044	131603243	+	2.63952	5.84911	10.2585	1.19124e-09	2.25055e-07	12.3223
ENSMUSG00000032712.17	protein_coding	Resf1	1	OTTMUSG00000026189.1	chr6	HAVANA	gene	149210912	149237161	+	1.34229	6.78759	10.2434	1.22269e-09	2.28838e-07	12.2688
ENSMUSG00000043760.17	protein_coding	Pkhd1	2	OTTMUSG00000026248.1	chr1	HAVANA	gene	20128003	20688288	-	2.14764	4.0817	10.2188	1.27575e-09	2.36557e-07	12.2612
ENSMUSG00000016534.16	protein_coding	Lamp2	2	OTTMUSG00000017230.1	chrX	HAVANA	gene	37490234	37545331	-	1.13866	7.98022	10.2131	1.28849e-09	2.36728e-07	12.2119
ENSMUSG00000021823.11	protein_coding	Vcl	2	OTTMUSG00000068787.1	chr14	HAVANA	gene	20979466	21083744	+	1.25859	9.79644	10.1944	1.33079e-09	2.42276e-07	12.1802
ENSMUSG00000050425.3	protein_coding	Mrgprb2	2	OTTMUSG00000046627.1	chr7	HAVANA	gene	48200713	48207834	-	3.33989	0.419151	10.468	8.3172e-10	1.85067e-07	12.1205
ENSMUSG00000037563.16	protein_coding	Rps16	2	OTTMUSG00000022980.1	chr7	HAVANA	gene	28050077	28052580	+	-1.32555	7.60368	-10.1323	1.48239e-09	2.67445e-07	12.0729
ENSMUSG00000060961.17	protein_coding	Slc4a4	2	OTTMUSG00000025881.1	chr5	HAVANA	gene	89034345	89387512	+	2.72401	6.13518	10.0906	1.5942e-09	2.85049e-07	12.0192
ENSMUSG00000060802.9	protein_coding	B2m	2	OTTMUSG00000015534.1	chr2	HAVANA	gene	121978167	121983564	+	1.08802	7.19866	10.0813	1.62045e-09	2.87178e-07	11.9841
ENSMUSG00000028164.16	protein_coding	Manba	2	OTTMUSG00000030307.1	chr3	HAVANA	gene	135191372	135277165	+	1.35095	5.72896	10.0704	1.65151e-09	2.90116e-07	11.9814
ENSMUSG00000025314.19	protein_coding	Ptprj	2	OTTMUSG00000014165.1	chr2	HAVANA	gene	90260098	90410991	-	1.411	6.62515	10.0016	1.86294e-09	3.21614e-07	11.8482
ENSMUSG00000012017.5	protein_coding	Scarf2	2	OTTMUSG00000071356.1	chr16	HAVANA	gene	17615146	17626157	+	1.62952	5.26451	9.9861	1.91455e-09	3.24922e-07	11.843
ENSMUSG00000100975.3	lncRNA	Gm28875	2	OTTMUSG00000048328.1	chr12	HAVANA	gene	104891760	104892948	-	-2.16153	2.98964	-9.99607	1.88129e-09	3.22006e-07	11.8425
ENSMUSG00000032625.15	protein_coding	Thsd7a	1	OTTMUSG00000030700.1	chr6	HAVANA	gene	12311609	12749409	-	4.0606	2.94263	10.0276	1.78014e-09	3.09991e-07	11.8297
ENSMUSG00000020547.6	protein_coding	Bzw2	2	OTTMUSG00000065626.1	chr12	HAVANA	gene	36141834	36208079	-	-1.47537	6.31738	-9.96512	1.98651e-09	3.3414e-07	11.7912
ENSMUSG00000052539.16	protein_coding	Magi3	2	OTTMUSG00000028459.1	chr3	HAVANA	gene	103920575	104127690	-	1.24579	6.44463	9.96064	2.00224e-09	3.3414e-07	11.7787
ENSMUSG00000086841.4	lncRNA	2410006H16Rik	2	OTTMUSG00000005863.1	chr11	HAVANA	gene	62493536	62495725	+	-1.61934	5.51475	-9.91238	2.18015e-09	3.57866e-07	11.7134
ENSMUSG00000026321.9	protein_coding	Tnfrsf11a	2	OTTMUSG00000048968.1	chr1	HAVANA	gene	105708443	105775709	+	1.66679	2.51107	9.91766	2.1599e-09	3.57473e-07	11.7027
ENSMUSG00000032596.15	protein_coding	Uba7	2	OTTMUSG00000042010.1	chr9	HAVANA	gene	107852704	107861259	+	2.46167	3.16511	9.89803	2.23617e-09	3.64077e-07	11.6971
ENSMUSG00000056888.12	protein_coding	Glipr1	1	OTTMUSG00000027780.1	chr10	HAVANA	gene	111821353	111838536	-	1.80578	5.98827	9.87464	2.33067e-09	3.73393e-07	11.6333
ENSMUSG00000004568.14	protein_coding	Arhgef18	2	OTTMUSG00000030752.1	chr8	HAVANA	gene	3403415	3506601	+	1.3165	7.01111	9.82927	2.52597e-09	3.97532e-07	11.5414
ENSMUSG00000000740.13	protein_coding	Rpl13	2	OTTMUSG00000016486.1	chr8	HAVANA	gene	123829089	123831983	+	-1.45931	8.03121	-9.82596	2.5409e-09	3.97532e-07	11.5317
ENSMUSG00000043102.3	protein_coding	Qrfp	2	OTTMUSG00000012081.1	chr2	HAVANA	gene	31696178	31700592	-	-2.80796	3.12381	-9.8325	2.51154e-09	3.97532e-07	11.5179
ENSMUSG00000037348.16	protein_coding	Paqr7	2	OTTMUSG00000011084.1	chr4	HAVANA	gene	134224008	134237546	+	1.4605	5.65483	9.80568	2.63417e-09	4.04318e-07	11.5133
ENSMUSG00000026893.5	protein_coding	Gca	2	OTTMUSG00000012870.1	chr2	HAVANA	gene	62494629	62524453	+	1.17204	3.68875	9.78036	2.7557e-09	4.11834e-07	11.5067
ENSMUSG00000029822.16	protein_coding	Osbpl3	2	OTTMUSG00000022235.1	chr6	HAVANA	gene	50270310	50433181	-	1.05216	7.83835	9.80341	2.64484e-09	4.04318e-07	11.4919
ENSMUSG00000032307.17	protein_coding	Ube2q2	2	OTTMUSG00000023433.1	chr9	HAVANA	gene	55056138	55114813	+	-1.34766	5.52977	-9.78945	2.71143e-09	4.08264e-07	11.4909
ENSMUSG00000010051.16	protein_coding	Hyal1	1	OTTMUSG00000028838.1	chr9	HAVANA	gene	107454126	107458909	+	1.65031	2.89113	9.79357	2.69158e-09	4.08264e-07	11.4905
ENSMUSG00000039405.8	protein_coding	Prss23	2	OTTMUSG00000059648.1	chr7	HAVANA	gene	89156991	89176395	-	3.58561	5.29997	9.7417	2.95256e-09	4.32751e-07	11.4338
ENSMUSG00000032375.16	protein_coding	Aph1b	1	OTTMUSG00000036114.1	chr9	HAVANA	gene	66682484	66702772	-	2.30991	2.86445	9.74019	2.9605e-09	4.32751e-07	11.4132
ENSMUSG00000057863.7	protein_coding	Rpl36	2	OTTMUSG00000072377.1	chr17	HAVANA	gene	56920416	56921243	+	-1.53487	7.38443	-9.72383	3.04842e-09	4.42375e-07	11.3516
ENSMUSG00000031543.19	protein_coding	Ank1	2	OTTMUSG00000026381.1	chr8	HAVANA	gene	23464860	23640513	+	-3.19675	2.13535	-9.81381	2.59635e-09	4.03058e-07	11.3241
ENSMUSG00000031274.17	protein_coding	Col4a5	2	OTTMUSG00000018954.1	chrX	HAVANA	gene	140258381	140472230	+	2.23168	6.052	9.64792	3.49305e-09	4.99656e-07	11.2256
ENSMUSG00000054693.15	protein_coding	Adam10	2	OTTMUSG00000033211.1	chr9	HAVANA	gene	70586279	70687511	+	1.05839	8.54833	9.63945	3.54672e-09	5.03735e-07	11.1961
ENSMUSG00000004383.19	protein_coding	Large1	2	OTTMUSG00000030306.1	chr8	HAVANA	gene	73541227	74080168	-	1.97011	5.68728	9.61472	3.70825e-09	5.1931e-07	11.1755
ENSMUSG00000037552.18	protein_coding	Plekhg2	2	OTTMUSG00000031950.1	chr7	HAVANA	gene	28059029	28072024	-	1.04648	6.56042	9.62162	3.6624e-09	5.16501e-07	11.1728
ENSMUSG00000120174.2	lncRNA	4931408D14Rik	2	NA	chr19	HAVANA	gene	37232068	37241537	-	2.95639	2.40775	9.69302	3.22135e-09	4.64106e-07	11.1648
ENSMUSG00000028497.13	protein_coding	Hacd4	2	OTTMUSG00000007653.1	chr4	HAVANA	gene	88314381	88357165	-	2.48656	2.55055	9.592	3.86339e-09	5.2471e-07	11.1496
ENSMUSG00000031639.13	protein_coding	Tlr3	2	OTTMUSG00000061136.1	chr8	HAVANA	gene	45848702	45864117	-	1.64031	5.29227	9.59212	3.86253e-09	5.2471e-07	11.1387
ENSMUSG00000109402.2	lncRNA	Gm45040	2	OTTMUSG00000059946.1	chr7	HAVANA	gene	107380121	107385653	+	7.3068	-0.631197	11.7332	1.05254e-10	4.32365e-08	11.1179
ENSMUSG00000029190.20	protein_coding	D5Ertd579e	2	OTTMUSG00000028039.1	chr5	HAVANA	gene	36757829	36853368	-	1.00912	6.6134	9.58993	3.87781e-09	5.2471e-07	11.114
ENSMUSG00000090862.4	protein_coding	Rps13	2	OTTMUSG00000058788.1	chr7	HAVANA	gene	115930740	115933430	-	-1.41593	7.20258	-9.57821	3.96078e-09	5.32339e-07	11.0898
ENSMUSG00000021018.9	protein_coding	Polr2h	2	OTTMUSG00000035122.1	chr16	HAVANA	gene	20536415	20541017	+	-1.71068	4.60102	-9.54643	4.19517e-09	5.56374e-07	11.0841
ENSMUSG00000041889.8	protein_coding	Shisa4	2	OTTMUSG00000026808.1	chr1	HAVANA	gene	135298795	135302975	-	2.7623	4.06945	9.5277	4.33991e-09	5.67685e-07	11.0611
ENSMUSG00000070348.6	protein_coding	Ccnd1	2	OTTMUSG00000026018.1	chr7	HAVANA	gene	144483668	144493662	-	-2.41843	9.26541	-9.56045	4.09006e-09	5.4605e-07	11.0544
ENSMUSG00000041351.17	protein_coding	Rap1gap	2	OTTMUSG00000009739.1	chr4	HAVANA	gene	137392037	137457172	+	-2.77278	5.29933	-9.51704	4.42469e-09	5.68005e-07	11.0287
ENSMUSG00000102692.2	protein_coding	Dchs2	1	OTTMUSG00000051805.1	chr3	HAVANA	gene	83035255	83264516	+	3.74226	-0.695218	10.2748	1.15819e-09	2.20918e-07	10.995
ENSMUSG00000030432.13	protein_coding	Rpl28	2	OTTMUSG00000022993.1	chr7	HAVANA	gene	4795873	4798065	+	-1.30028	7.95334	-9.52385	4.37034e-09	5.67685e-07	10.9875
ENSMUSG00000047675.16	protein_coding	Rps8	2	OTTMUSG00000009917.1	chr4	HAVANA	gene	117011024	117013440	-	-1.36442	8.91171	-9.52089	4.39385e-09	5.67685e-07	10.9813
ENSMUSG00000016503.19	protein_coding	Gtf3a	2	OTTMUSG00000024608.1	chr5	HAVANA	gene	146885467	146892424	+	-1.17313	6.13171	-9.50974	4.4837e-09	5.68295e-07	10.9772
ENSMUSG00000067889.8	protein_coding	Sptbn2	2	OTTMUSG00000074060.1	chr19	HAVANA	gene	4761195	4802388	+	2.84166	6.32162	9.51077	4.47527e-09	5.68295e-07	10.9715
ENSMUSG00000003352.15	protein_coding	Cacnb3	2	OTTMUSG00000070930.1	chr15	HAVANA	gene	98528721	98542410	+	1.20372	6.48417	9.50192	4.54781e-09	5.72796e-07	10.9561
ENSMUSG00000029703.11	protein_coding	Lrwd1	2	OTTMUSG00000025432.1	chr5	HAVANA	gene	136151626	136164928	-	-1.1077	5.3305	-9.48602	4.68107e-09	5.85895e-07	10.953
ENSMUSG00000040952.17	protein_coding	Rps19	2	OTTMUSG00000022935.1	chr7	HAVANA	gene	24583796	24589231	+	-1.35066	7.85521	-9.4787	4.7438e-09	5.90058e-07	10.9055
ENSMUSG00000020460.16	protein_coding	Rps27a	2	OTTMUSG00000005330.1	chr11	HAVANA	gene	29495846	29498109	-	-1.55081	7.7227	-9.4695	4.82386e-09	5.96313e-07	10.8896
ENSMUSG00000031613.10	protein_coding	Hpgd	2	OTTMUSG00000060690.1	chr8	HAVANA	gene	56747620	56774078	+	4.76169	1.6301	9.5923	3.8613e-09	5.2471e-07	10.8895
ENSMUSG00000020181.19	protein_coding	Nav3	2	OTTMUSG00000034560.1	chr10	HAVANA	gene	109517120	110292065	-	-2.63921	3.8582	-9.42481	5.23337e-09	6.31346e-07	10.8762
ENSMUSG00000040254.12	protein_coding	Sema3d	2	OTTMUSG00000054617.1	chr5	HAVANA	gene	12433352	12638915	+	3.40512	1.0818	9.60849	3.75011e-09	5.21526e-07	10.86
ENSMUSG00000022598.7	protein_coding	Psca	2	OTTMUSG00000045264.1	chr15	HAVANA	gene	74586688	74588918	+	3.22432	7.73682	9.43361	5.14998e-09	6.25052e-07	10.8265
ENSMUSG00000061477.5	protein_coding	Rps7	2	OTTMUSG00000066425.1	chr12	HAVANA	gene	28680853	28685952	-	-1.31061	7.56726	-9.43483	5.1385e-09	6.25052e-07	10.8261
ENSMUSG00000039646.6	protein_coding	Vasn	2	OTTMUSG00000024383.1	chr16	HAVANA	gene	4457805	4468666	+	1.99294	3.876	9.38912	5.58609e-09	6.54193e-07	10.8134
ENSMUSG00000003363.16	protein_coding	Pld3	2	OTTMUSG00000031815.1	chr7	HAVANA	gene	27231425	27252643	-	1.50768	5.71332	9.41601	5.31815e-09	6.37732e-07	10.8118
ENSMUSG00000003970.10	protein_coding	Rpl8	2	OTTMUSG00000071205.1	chr15	HAVANA	gene	76788278	76790514	+	-1.58943	9.46777	-9.40806	5.39588e-09	6.43202e-07	10.7756
ENSMUSG00000085148.2	lncRNA	Mir22hg	2	OTTMUSG00000006201.1	chr11	HAVANA	gene	75352365	75357502	+	2.39026	4.72775	9.36614	5.82618e-09	6.78343e-07	10.7668
ENSMUSG00000060636.15	protein_coding	Rpl35a	2	OTTMUSG00000024790.1	chr16	HAVANA	gene	32876823	32880559	+	-1.28259	7.13625	-9.40069	5.46915e-09	6.48079e-07	10.7659
ENSMUSG00000067377.13	protein_coding	Tspan6	2	OTTMUSG00000018712.1	chrX	HAVANA	gene	132791817	132799178	-	2.26087	1.7547	9.44437	5.04986e-09	6.2042e-07	10.7427
ENSMUSG00000028755.4	protein_coding	Cda	2	OTTMUSG00000009980.1	chr4	HAVANA	gene	138065735	138095303	-	-1.60503	3.33193	-9.32618	6.26954e-09	7.17451e-07	10.7007
ENSMUSG00000032624.17	protein_coding	Eml4	2	OTTMUSG00000072765.1	chr17	HAVANA	gene	83658360	83787790	+	-0.961991	6.13726	-9.35776	5.91641e-09	6.84867e-07	10.6976
ENSMUSG00000024525.8	protein_coding	Impa2	2	OTTMUSG00000074420.1	chr18	HAVANA	gene	67422256	67455542	+	-1.80774	4.12289	-9.31307	6.42249e-09	7.26648e-07	10.676
ENSMUSG00000038879.9	protein_coding	Nipal2	2	OTTMUSG00000070249.1	chr15	HAVANA	gene	34572945	34679358	-	1.57064	4.3577	9.32224	6.31512e-09	7.1856e-07	10.6719
ENSMUSG00000046364.15	protein_coding	Rpl27a	2	OTTMUSG00000022787.1	chr7	HAVANA	gene	109118354	109121574	+	-1.4753	7.67352	-9.33575	6.1603e-09	7.09001e-07	10.6442
ENSMUSG00000019734.17	protein_coding	Tmc4	2	OTTMUSG00000027890.1	chr7	HAVANA	gene	3668789	3680552	-	1.72835	7.32076	9.30987	6.46042e-09	7.26833e-07	10.5962
ENSMUSG00000017756.10	protein_coding	Slc12a7	2	OTTMUSG00000067622.1	chr13	HAVANA	gene	73881213	73964873	+	1.757	7.90061	9.29561	6.63223e-09	7.37287e-07	10.5691
ENSMUSG00000028495.15	protein_coding	Rps6	2	OTTMUSG00000007781.1	chr4	HAVANA	gene	86772897	86775649	-	-1.41116	7.45189	-9.29304	6.66379e-09	7.37287e-07	10.5662
ENSMUSG00000059070.17	protein_coding	Rpl18	2	OTTMUSG00000023185.1	chr7	HAVANA	gene	45364881	45370260	+	-1.2435	8.58128	-9.2795	6.83215e-09	7.47654e-07	10.5378
ENSMUSG00000031565.20	protein_coding	Fgfr1	2	OTTMUSG00000031031.1	chr8	HAVANA	gene	26003670	26065734	+	-2.57568	1.61429	-9.25769	7.11261e-09	7.6993e-07	10.523
ENSMUSG00000027488.13	protein_coding	Snta1	2	OTTMUSG00000015793.1	chr2	HAVANA	gene	154218233	154250019	-	1.7973	3.28958	9.21273	7.72919e-09	8.11427e-07	10.4969
ENSMUSG00000019952.16	protein_coding	Poc1b	2	OTTMUSG00000032479.1	chr10	HAVANA	gene	98942898	99033936	+	-1.33079	4.42683	-9.20857	7.78899e-09	8.12408e-07	10.4756
ENSMUSG00000021819.12	protein_coding	Zswim8	2	OTTMUSG00000068777.1	chr14	HAVANA	gene	20757620	20773687	+	1.44047	7.29748	9.23681	7.39236e-09	7.91769e-07	10.4636
ENSMUSG00000057036.8	processed_pseudogene	Gm7536	2	OTTMUSG00000051144.1	chr3	HAVANA	gene	24387232	24387675	+	-1.7984	1.91402	-9.27492	6.89e-09	7.49887e-07	10.4586
ENSMUSG00000087028.9	lncRNA	Gm13387	2	OTTMUSG00000011779.1	chr2	HAVANA	gene	25011617	25071716	-	-3.04515	4.78934	-9.19201	8.03186e-09	8.33399e-07	10.458
ENSMUSG00000032288.10	protein_coding	Imp3	2	OTTMUSG00000033769.1	chr9	HAVANA	gene	56844759	56845682	+	-1.17033	5.05462	-9.21204	7.73906e-09	8.11427e-07	10.4578
ENSMUSG00000058152.9	protein_coding	Chsy3	2	OTTMUSG00000073485.1	chr18	HAVANA	gene	59308473	59669071	+	2.12469	5.17103	9.21241	7.73387e-09	8.11427e-07	10.4482
ENSMUSG00000037260.9	protein_coding	Hgsnat	2	OTTMUSG00000060876.1	chr8	HAVANA	gene	26434481	26466781	-	1.0433	6.0806	9.21709	7.66715e-09	8.11427e-07	10.4366
ENSMUSG00000079481.12	protein_coding	Nhsl2	2	OTTMUSG00000018290.1	chrX	HAVANA	gene	100892991	101135661	+	2.64313	1.69019	9.28853	6.71931e-09	7.39346e-07	10.436
ENSMUSG00000030621.18	protein_coding	Me3	2	OTTMUSG00000025905.1	chr7	HAVANA	gene	89281600	89503567	+	3.21181	0.904247	9.3969	5.50711e-09	6.48738e-07	10.3704
ENSMUSG00000017466.11	protein_coding	Timp2	2	OTTMUSG00000003883.1	chr11	HAVANA	gene	118191887	118246566	-	1.08176	9.9978	9.1665	8.4212e-09	8.69293e-07	10.3294
ENSMUSG00000023830.15	protein_coding	Igf2r	2	OTTMUSG00000034915.1	chr17	HAVANA	gene	12901293	12988551	-	1.48769	7.47978	9.15574	8.59131e-09	8.82305e-07	10.3088
ENSMUSG00000036885.15	protein_coding	Arhgef26	2	OTTMUSG00000031219.1	chr3	HAVANA	gene	62245765	62369642	+	4.68358	1.67674	9.23673	7.39343e-09	7.91769e-07	10.3039
ENSMUSG00000008683.17	protein_coding	Rps15a	2	OTTMUSG00000023996.1	chr7	HAVANA	gene	117703595	117715411	-	-1.38307	7.21252	-9.15082	8.67034e-09	8.85879e-07	10.303
ENSMUSG00000027737.11	protein_coding	Slc7a11	2	OTTMUSG00000021262.1	chr3	HAVANA	gene	49846975	50398063	-	-3.9087	5.90603	-9.11018	9.35204e-09	9.36419e-07	10.2992
ENSMUSG00000020372.16	protein_coding	Rack1	2	OTTMUSG00000005526.1	chr11	HAVANA	gene	48691159	48697261	+	-1.25689	9.55138	-9.14524	8.76082e-09	8.9058e-07	10.2886
ENSMUSG00000061983.8	protein_coding	Rps12	2	OTTMUSG00000064263.1	chr10	HAVANA	gene	23661081	23663173	-	-1.53885	8.58558	-9.1292	9.02632e-09	9.12934e-07	10.2581
ENSMUSG00000106847.2	lncRNA	Peg13	2	OTTMUSG00000055869.1	chr15	HAVANA	gene	72677449	72682173	-	1.14652	3.84544	9.07701	9.94933e-09	9.71928e-07	10.2467
ENSMUSG00000025794.10	protein_coding	Rpl14	2	OTTMUSG00000062595.1	chr9	HAVANA	gene	120400510	120403720	+	-1.36706	8.1485	-9.11616	9.24834e-09	9.3069e-07	10.234
ENSMUSG00000040093.17	protein_coding	Bmf	2	OTTMUSG00000015369.1	chr2	HAVANA	gene	118359238	118380168	-	3.39957	4.02722	9.05989	1.0273e-08	9.90099e-07	10.2179
ENSMUSG00000025362.7	protein_coding	Rps26	2	OTTMUSG00000065011.1	chr10	HAVANA	gene	128460403	128462616	-	-1.36652	8.27862	-9.10288	9.48019e-09	9.44529e-07	10.209
ENSMUSG00000027546.16	protein_coding	Atp9a	2	OTTMUSG00000016114.1	chr2	HAVANA	gene	168476358	168584329	-	1.47829	6.55064	9.08741	9.75801e-09	9.67395e-07	10.1853
ENSMUSG00000039239.15	protein_coding	Tgfb2	2	OTTMUSG00000050852.1	chr1	HAVANA	gene	186354989	186438186	-	6.06558	0.968105	9.76135	2.85072e-09	4.22877e-07	10.1849
ENSMUSG00000002365.11	protein_coding	Snx9	2	OTTMUSG00000071920.1	chr17	HAVANA	gene	5891604	5982229	+	-1.09188	6.91843	-9.08446	9.81188e-09	9.67944e-07	10.1803
ENSMUSG00000044533.16	protein_coding	Rps2	2	OTTMUSG00000029228.1	chr17	HAVANA	gene	24937090	24940903	+	-1.58848	9.45526	-9.07143	1.00537e-08	9.77353e-07	10.1502
ENSMUSG00000025083.19	protein_coding	Afap1l2	2	OTTMUSG00000028250.1	chr19	HAVANA	gene	56900793	56996660	-	3.12229	2.16898	9.0471	1.05221e-08	9.93966e-07	10.1372
ENSMUSG00000033377.15	protein_coding	Palmd	2	OTTMUSG00000029790.1	chr3	HAVANA	gene	116711907	116762636	-	1.95229	6.09165	9.04708	1.05224e-08	9.93966e-07	10.1213
ENSMUSG00000025508.14	protein_coding	Rplp2	2	OTTMUSG00000024569.1	chr7	HAVANA	gene	141027283	141031498	+	-1.35316	8.26749	-9.05423	1.03825e-08	9.90099e-07	10.1177
ENSMUSG00000063018.9	lncRNA	2010204K13Rik	2	OTTMUSG00000016480.1	chrX	HAVANA	gene	7214684	7340328	-	-3.62187	1.09103	-9.29576	6.63041e-09	7.37287e-07	10.0938
ENSMUSG00000057137.10	protein_coding	Tmem140	2	OTTMUSG00000022811.1	chr6	HAVANA	gene	34840081	34851881	+	2.01417	4.60386	8.99787	1.154e-08	1.06991e-06	10.0816
ENSMUSG00000036989.17	protein_coding	Trim3	1	OTTMUSG00000017539.1	chr7	HAVANA	gene	105253670	105282778	-	0.891638	6.51043	9.01777	1.11168e-08	1.04519e-06	10.0563
ENSMUSG00000022537.19	protein_coding	Tmem44	2	OTTMUSG00000024220.1	chr16	HAVANA	gene	30330673	30369660	-	3.51552	2.7754	8.98854	1.17442e-08	1.07666e-06	10.0352
ENSMUSG00000079435.10	protein_coding	Rpl36a	2	OTTMUSG00000019345.1	chrX	HAVANA	gene	133486403	133488811	+	-1.43728	6.7724	-9.00579	1.13697e-08	1.06392e-06	10.035
ENSMUSG00000085289.3	lncRNA	Gm15337	2	OTTMUSG00000020318.1	chr18	HAVANA	gene	39485350	39527214	-	1.91073	2.70976	8.95883	1.24196e-08	1.1054e-06	10.029
ENSMUSG00000024640.10	protein_coding	Psat1	2	OTTMUSG00000030919.1	chr19	HAVANA	gene	15882042	15924701	-	-2.48748	8.08271	-9.00333	1.14223e-08	1.06392e-06	10.0241
ENSMUSG00000078234.7	protein_coding	Klhdc7a	2	OTTMUSG00000010055.1	chr4	HAVANA	gene	139687531	139695337	-	3.1743	4.23586	8.96369	1.23065e-08	1.10516e-06	10.0218
ENSMUSG00000045414.8	protein_coding	Dipk2a	2	OTTMUSG00000046987.1	chr9	HAVANA	gene	94399917	94420134	-	1.67362	5.41515	8.98235	1.18816e-08	1.07666e-06	10.0196
ENSMUSG00000034998.19	protein_coding	Foxn2	2	OTTMUSG00000033848.1	chr17	HAVANA	gene	88748139	88797961	+	-1.04552	5.01076	-8.96105	1.23679e-08	1.1054e-06	9.99902
ENSMUSG00000031714.11	protein_coding	Gab1	2	OTTMUSG00000061338.1	chr8	HAVANA	gene	81491063	81607148	-	1.48648	3.94653	8.94567	1.27316e-08	1.12752e-06	9.98758
ENSMUSG00000032518.7	protein_coding	Rpsa	2	OTTMUSG00000062571.1	chr9	HAVANA	gene	119956755	119961435	+	-1.49459	9.47565	-8.98445	1.18349e-08	1.07666e-06	9.98605
ENSMUSG00000003429.12	protein_coding	Rps11	2	OTTMUSG00000058711.1	chr7	HAVANA	gene	44771803	44773863	-	-1.26413	8.3145	-8.98267	1.18746e-08	1.07666e-06	9.9823
ENSMUSG00000024912.7	protein_coding	Fosl1	2	OTTMUSG00000074356.1	chr19	HAVANA	gene	5497575	5505974	+	-6.29114	3.42541	-9.08092	9.87691e-09	9.69583e-07	9.97618
ENSMUSG00000012848.16	protein_coding	Rps5	2	OTTMUSG00000023212.1	chr7	HAVANA	gene	12656217	12660613	+	-1.31038	8.73148	-8.96667	1.22375e-08	1.10391e-06	9.95178
ENSMUSG00000074129.15	protein_coding	Rpl13a	2	OTTMUSG00000016498.1	chr7	HAVANA	gene	44774982	44778185	-	-1.37019	5.97317	-8.94362	1.27808e-08	1.12752e-06	9.93296
ENSMUSG00000020255.9	protein_coding	Nopchap1	2	OTTMUSG00000060613.1	chr10	HAVANA	gene	83196085	83324369	+	-1.31968	5.40654	-8.92986	1.3117e-08	1.14906e-06	9.92513
ENSMUSG00000022748.9	protein_coding	Cmss1	2	OTTMUSG00000071573.1	chr16	HAVANA	gene	57122363	57427227	-	-2.21153	3.46917	-8.89461	1.40206e-08	1.1948e-06	9.91469
ENSMUSG00000045969.9	protein_coding	Ing1	2	OTTMUSG00000060767.1	chr8	HAVANA	gene	11605571	11613251	+	-1.04275	5.45587	-8.92786	1.31668e-08	1.14906e-06	9.91129
ENSMUSG00000038280.13	protein_coding	Ostm1	2	OTTMUSG00000019462.1	chr10	HAVANA	gene	42459818	42578455	+	1.02119	5.33133	8.92168	1.33213e-08	1.14988e-06	9.90146
ENSMUSG00000110411.2	TEC	Gm45457	2	OTTMUSG00000061212.1	chr8	HAVANA	gene	46232265	46235353	+	3.37833	1.22198	9.0545	1.03773e-08	9.90099e-07	9.8774
ENSMUSG00000022157.9	protein_coding	Mcpt8	2	OTTMUSG00000068803.1	chr14	HAVANA	gene	56319623	56322730	-	-5.45714	2.83761	-8.92344	1.32769e-08	1.14988e-06	9.86776
ENSMUSG00000051323.17	protein_coding	Pcdh19	2	OTTMUSG00000018675.1	chrX	HAVANA	gene	132483609	132589736	-	2.68208	3.47494	8.87328	1.45986e-08	1.22323e-06	9.86393
ENSMUSG00000025785.6	protein_coding	Exosc7	2	OTTMUSG00000034189.1	chr9	HAVANA	gene	122942280	122965194	+	-1.12304	4.74946	-8.87759	1.448e-08	1.2198e-06	9.85051
ENSMUSG00000031441.16	protein_coding	Atp11a	2	OTTMUSG00000020604.1	chr8	HAVANA	gene	12807014	12918728	+	1.31878	6.7878	8.91027	1.36116e-08	1.16989e-06	9.85047
ENSMUSG00000040152.9	protein_coding	Thbs1	2	OTTMUSG00000015240.1	chr2	HAVANA	gene	117942357	117957614	+	2.7284	9.57494	8.89852	1.39173e-08	1.19106e-06	9.82558
ENSMUSG00000040722.8	protein_coding	Scamp5	2	OTTMUSG00000063177.1	chr9	HAVANA	gene	57348610	57375343	-	1.85855	2.03865	8.85124	1.52215e-08	1.25961e-06	9.79941
ENSMUSG00000062647.17	protein_coding	Rpl7a	2	OTTMUSG00000011740.1	chr2	HAVANA	gene	26800776	26803330	+	-1.19391	9.03228	-8.87829	1.44607e-08	1.2198e-06	9.78382
ENSMUSG00000068876.17	protein_coding	Cgn	1	OTTMUSG00000019660.1	chr3	HAVANA	gene	94667376	94693826	-	1.95817	7.26565	8.87106	1.46603e-08	1.22328e-06	9.77523
ENSMUSG00000066026.15	protein_coding	Dhrs3	2	OTTMUSG00000010749.1	chr4	HAVANA	gene	144619397	144654779	+	3.28789	6.77048	8.85279	1.5177e-08	1.25961e-06	9.76687
ENSMUSG00000022094.16	protein_coding	Slc39a14	2	OTTMUSG00000033235.1	chr14	HAVANA	gene	70540918	70588874	-	-1.61741	5.7323	-8.84388	1.54359e-08	1.2721e-06	9.75108
ENSMUSG00000043079.18	protein_coding	Synpo	2	OTTMUSG00000033190.1	chr18	HAVANA	gene	60727045	60793214	-	5.49735	3.45734	8.83601	1.56683e-08	1.2822e-06	9.70591
ENSMUSG00000030744.14	protein_coding	Rps3	2	OTTMUSG00000025334.1	chr7	HAVANA	gene	99127103	99132945	-	-1.22476	9.29702	-8.8354	1.56865e-08	1.2822e-06	9.70224
ENSMUSG00000020009.14	protein_coding	Ifngr1	2	OTTMUSG00000035345.1	chr10	HAVANA	gene	19467697	19485977	+	1.36162	6.56221	8.82084	1.61267e-08	1.31282e-06	9.68473
ENSMUSG00000055976.7	protein_coding	Cldn23	2	OTTMUSG00000061042.1	chr8	HAVANA	gene	36291866	36293713	-	2.03948	2.29115	8.77924	1.74563e-08	1.40393e-06	9.66854
ENSMUSG00000038507.7	protein_coding	Parp12	2	OTTMUSG00000023211.1	chr6	HAVANA	gene	39063344	39095283	-	1.99675	2.77773	8.76538	1.79238e-08	1.41875e-06	9.66379
ENSMUSG00000020357.4	protein_coding	Flt4	2	OTTMUSG00000005554.1	chr11	HAVANA	gene	49500090	49543566	+	2.0458	5.31254	8.77232	1.7688e-08	1.40875e-06	9.65014
ENSMUSG00000061787.16	protein_coding	Rps17	2	OTTMUSG00000022965.1	chr7	HAVANA	gene	80992480	80995002	-	-1.31343	7.69498	-8.80684	1.65619e-08	1.34279e-06	9.64951
ENSMUSG00000013236.18	protein_coding	Ptprs	2	OTTMUSG00000014929.1	chr17	HAVANA	gene	56719426	56783483	-	1.2486	8.32781	8.78177	1.73723e-08	1.40281e-06	9.59929
ENSMUSG00000035212.15	protein_coding	Leprot	2	OTTMUSG00000008452.1	chr4	HAVANA	gene	101504915	101516561	+	0.89452	6.74082	8.77116	1.77272e-08	1.40875e-06	9.58571
ENSMUSG00000057841.6	protein_coding	Rpl32	2	OTTMUSG00000022927.1	chr6	HAVANA	gene	115782466	115785708	-	-1.47073	8.7425	-8.77327	1.7656e-08	1.40875e-06	9.58311
ENSMUSG00000035828.12	protein_coding	Pim3	2	OTTMUSG00000070736.1	chr15	HAVANA	gene	88746389	88749929	+	-2.14969	6.45727	-8.75881	1.81503e-08	1.42812e-06	9.5784
ENSMUSG00000048758.15	protein_coding	Rpl29	2	OTTMUSG00000033747.1	chr9	HAVANA	gene	106306653	106308767	+	-1.35418	6.32573	-8.75096	1.84245e-08	1.44128e-06	9.55703
ENSMUSG00000041936.19	protein_coding	Agrn	2	OTTMUSG00000011080.1	chr4	HAVANA	gene	156249747	156281945	-	1.64794	9.68017	8.74649	1.85823e-08	1.44423e-06	9.53311
ENSMUSG00000022283.16	protein_coding	Pabpc1	2	OTTMUSG00000019779.1	chr15	HAVANA	gene	36595905	36609912	-	-1.38733	10.2741	-8.74582	1.86064e-08	1.44423e-06	9.53248
ENSMUSG00000009927.10	protein_coding	Rps25	2	OTTMUSG00000063299.1	chr9	HAVANA	gene	44318436	44321724	+	-1.39825	7.46169	-8.73374	1.90412e-08	1.46661e-06	9.51035
ENSMUSG00000029135.11	protein_coding	Fosl2	2	OTTMUSG00000055218.1	chr5	HAVANA	gene	32293145	32315186	+	1.86616	6.88598	8.71508	1.97334e-08	1.50833e-06	9.48399
ENSMUSG00000037972.8	protein_coding	Snn	2	OTTMUSG00000071221.1	chr16	HAVANA	gene	10878809	10892849	+	1.61311	5.47953	8.70373	2.01673e-08	1.53563e-06	9.4824
ENSMUSG00000025967.17	protein_coding	Eef1b2	2	OTTMUSG00000002614.1	chr1	HAVANA	gene	63215984	63219645	+	-1.3745	8.5765	-8.71619	1.96915e-08	1.50833e-06	9.47326
ENSMUSG00000000958.11	protein_coding	Slc7a7	2	OTTMUSG00000053898.1	chr14	HAVANA	gene	54606899	54655237	-	1.89213	4.42694	8.66523	2.17139e-08	1.62254e-06	9.46819
ENSMUSG00000068747.15	protein_coding	Sort1	2	OTTMUSG00000007304.1	chr3	HAVANA	gene	108191398	108268827	+	2.15775	4.27675	8.66562	2.16978e-08	1.62254e-06	9.46301
ENSMUSG00000034667.9	protein_coding	Xpot	2	OTTMUSG00000064433.1	chr10	HAVANA	gene	121423285	121462237	-	-1.18715	6.98521	-8.69389	2.05514e-08	1.55895e-06	9.43796
ENSMUSG00000030019.7	protein_coding	Fbxl14	2	OTTMUSG00000024104.1	chr6	HAVANA	gene	119456629	119459591	+	-1.166	5.93724	-8.67708	2.12253e-08	1.60399e-06	9.42268
ENSMUSG00000107215.2	TEC	Gm43197	2	OTTMUSG00000055007.1	chr6	HAVANA	gene	3336772	3339354	-	2.19421	2.31491	8.62075	2.36547e-08	1.71634e-06	9.38241
ENSMUSG00000051397.6	protein_coding	Tacstd2	2	OTTMUSG00000052511.1	chr6	HAVANA	gene	67511046	67512780	-	1.43201	5.95662	8.6584	2.20009e-08	1.63788e-06	9.37573
ENSMUSG00000001281.11	protein_coding	Itgb7	2	OTTMUSG00000030863.1	chr15	HAVANA	gene	102124430	102140379	-	-1.79078	5.15341	-8.60202	2.45249e-08	1.76667e-06	9.32687
ENSMUSG00000006411.13	protein_coding	Nectin4	2	OTTMUSG00000021602.1	chr1	HAVANA	gene	171197667	171216166	+	2.05823	5.6855	8.62669	2.33853e-08	1.70296e-06	9.32653
ENSMUSG00000024997.8	protein_coding	Prdx3	2	OTTMUSG00000021212.1	chr19	HAVANA	gene	60852489	60862994	-	-1.08166	6.28803	-8.63033	2.32222e-08	1.69992e-06	9.32228
ENSMUSG00000018920.12	protein_coding	Cxcl16	2	OTTMUSG00000006042.1	chr11	HAVANA	gene	70344809	70350810	-	1.4944	6.96844	8.63322	2.3093e-08	1.69992e-06	9.31833
ENSMUSG00000028780.14	protein_coding	Sema3c	1	OTTMUSG00000035305.1	chr5	HAVANA	gene	17779279	17935266	+	1.21915	9.69442	8.62951	2.32587e-08	1.69992e-06	9.30666
ENSMUSG00000027346.16	protein_coding	Gpcpd1	2	OTTMUSG00000015660.1	chr2	HAVANA	gene	132371002	132429649	-	1.49512	4.56809	8.5819	2.54967e-08	1.82356e-06	9.29754
ENSMUSG00000062867.14	protein_coding	Impdh2	2	OTTMUSG00000050763.1	chr9	HAVANA	gene	108437485	108442783	+	-2.32404	6.4391	-8.61118	2.40952e-08	1.74199e-06	9.29433
ENSMUSG00000030725.5	protein_coding	Lipt2	2	OTTMUSG00000025283.1	chr7	HAVANA	gene	99808484	99810572	+	-2.41903	1.5229	-8.65222	2.2264e-08	1.64995e-06	9.28781
ENSMUSG00000053604.6	protein_coding	Rpia	2	OTTMUSG00000022844.1	chr6	HAVANA	gene	70742704	70769216	-	-1.3512	5.10926	-8.57942	2.56189e-08	1.82578e-06	9.25633
ENSMUSG00000037104.10	protein_coding	Socs5	2	OTTMUSG00000072659.1	chr17	HAVANA	gene	87415107	87445267	+	-0.897143	5.88296	-8.58642	2.52749e-08	1.81418e-06	9.24497
ENSMUSG00000049409.10	protein_coding	Prokr1	2	OTTMUSG00000057205.1	chr6	HAVANA	gene	87555573	87567725	-	-2.42629	0.973409	-8.75781	1.81849e-08	1.42812e-06	9.213
ENSMUSG00000067274.11	protein_coding	Rplp0	2	OTTMUSG00000014700.1	chr5	HAVANA	gene	115697526	115701786	+	-1.36767	9.02245	-8.57298	2.59398e-08	1.84209e-06	9.19584
ENSMUSG00000078202.4	protein_coding	Nrarp	2	OTTMUSG00000011778.1	chr2	HAVANA	gene	25070770	25073351	+	-2.52452	4.33426	-8.50988	2.93142e-08	2.0243e-06	9.1825
ENSMUSG00000034675.18	protein_coding	Dbn1	2	OTTMUSG00000017050.1	chr13	HAVANA	gene	55621242	55635924	-	2.2603	5.6394	8.54403	2.74351e-08	1.92601e-06	9.17751
ENSMUSG00000037940.18	protein_coding	Inpp4b	2	OTTMUSG00000035809.1	chr8	HAVANA	gene	82069185	82854543	+	-1.56783	4.43033	-8.51267	2.91556e-08	2.02031e-06	9.17669
ENSMUSG00000039982.9	protein_coding	Dtx4	2	OTTMUSG00000073768.1	chr19	HAVANA	gene	12443702	12478818	-	2.4029	5.62087	8.53601	2.78649e-08	1.94433e-06	9.175
ENSMUSG00000038121.7	protein_coding	Fam210a	2	OTTMUSG00000023928.1	chr18	HAVANA	gene	68393258	68433404	-	-0.82026	5.80461	-8.5427	2.75061e-08	1.92601e-06	9.16241
ENSMUSG00000031532.8	protein_coding	Saraf	2	OTTMUSG00000061000.1	chr8	HAVANA	gene	34621717	34637999	+	0.852274	6.23079	8.54587	2.73377e-08	1.92601e-06	9.15772
ENSMUSG00000063457.15	protein_coding	Rps15	2	OTTMUSG00000000015.1	chr10	HAVANA	gene	80128287	80129948	+	-1.23344	8.61057	-8.55182	2.70245e-08	1.91234e-06	9.15441
ENSMUSG00000092341.7	lncRNA	Malat1	2	OTTMUSG00000037798.1	chr19	HAVANA	gene	5845717	5853602	-	1.92566	10.9792	8.52057	2.8712e-08	1.99648e-06	9.09864
ENSMUSG00000033256.15	protein_coding	Shf	1	OTTMUSG00000015613.1	chr2	HAVANA	gene	122179373	122199643	-	-1.61336	4.21091	-8.45794	3.2431e-08	2.19413e-06	9.07964
ENSMUSG00000031754.11	protein_coding	Nudt21	2	OTTMUSG00000061594.1	chr8	HAVANA	gene	94742124	94763659	-	-1.06345	4.70773	-8.47806	3.11847e-08	2.11891e-06	9.07855
ENSMUSG00000042244.5	protein_coding	Pglyrp3	2	OTTMUSG00000026663.1	chr3	HAVANA	gene	91921890	91938889	+	3.84811	-0.730051	8.92664	1.31971e-08	1.14906e-06	9.07525
ENSMUSG00000035722.16	protein_coding	Abca7	2	OTTMUSG00000032606.1	chr10	HAVANA	gene	79832328	79851406	+	1.0419	6.54939	8.50555	2.95616e-08	2.03436e-06	9.07472
ENSMUSG00000026896.15	protein_coding	Ifih1	2	OTTMUSG00000012871.1	chr2	HAVANA	gene	62426142	62476599	-	1.59648	2.71868	8.44284	3.33999e-08	2.24452e-06	9.06871
ENSMUSG00000035413.9	protein_coding	Tmem98	2	OTTMUSG00000000222.1	chr11	HAVANA	gene	80701001	80712859	+	1.1658	6.4569	8.49149	3.03805e-08	2.07839e-06	9.04757
ENSMUSG00000042406.9	protein_coding	Atf4	2	OTTMUSG00000070848.1	chr15	HAVANA	gene	80139385	80141742	+	-1.4783	8.0263	-8.49101	3.04088e-08	2.07839e-06	9.03713
ENSMUSG00000079037.10	protein_coding	Prnp	2	OTTMUSG00000014846.1	chr2	HAVANA	gene	131751848	131780349	+	1.2545	6.43486	8.47759	3.12134e-08	2.11891e-06	9.02146
ENSMUSG00000013089.16	protein_coding	Etv5	2	OTTMUSG00000036714.1	chr16	HAVANA	gene	22200059	22258469	-	-6.98317	2.3295	-8.65073	2.23278e-08	1.64995e-06	8.99487
ENSMUSG00000129385.1	lncRNA	ENSMUSG00000129385	2	NA	chr10	HAVANA	gene	120446049	120451471	+	-5.13927	0.446618	-8.87698	1.44967e-08	1.2198e-06	8.98088
ENSMUSG00000024427.8	protein_coding	Spry4	2	OTTMUSG00000073472.1	chr18	HAVANA	gene	38719300	38734468	-	-5.91553	1.78022	-8.74311	1.8703e-08	1.44613e-06	8.97765
ENSMUSG00000047613.11	protein_coding	A430005L14Rik	2	OTTMUSG00000010500.1	chr4	HAVANA	gene	154041694	154046382	+	-1.45759	4.09742	-8.40388	3.60411e-08	2.4038e-06	8.9725
ENSMUSG00000024479.4	protein_coding	Mal2	2	OTTMUSG00000070418.1	chr15	HAVANA	gene	54434588	54466243	+	1.54538	7.19101	8.45193	3.28132e-08	2.21251e-06	8.96268
ENSMUSG00000057143.16	protein_coding	Trim12c	2	OTTMUSG00000019193.1	chr7	HAVANA	gene	103987961	104002569	-	1.9079	3.30059	8.37906	3.78351e-08	2.46732e-06	8.94386
ENSMUSG00000071648.5	protein_coding	Rom1	2	OTTMUSG00000074544.1	chr19	HAVANA	gene	8904755	8906720	-	-1.57548	3.80337	-8.37571	3.80844e-08	2.46821e-06	8.9288
ENSMUSG00000045954.8	protein_coding	Cavin2	2	OTTMUSG00000046712.1	chr1	HAVANA	gene	51328285	51342119	+	1.60243	6.46058	8.42257	3.47481e-08	2.32731e-06	8.92411
ENSMUSG00000038812.17	protein_coding	Trmt112	2	OTTMUSG00000038206.1	chr19	HAVANA	gene	6887066	6888417	+	-1.13588	4.64608	-8.38361	3.74998e-08	2.4622e-06	8.90092
ENSMUSG00000106734.6	lncRNA	Gm20559	2	OTTMUSG00000055005.1	chr6	HAVANA	gene	3333191	3346140	-	1.81034	3.64443	8.35952	3.93126e-08	2.53443e-06	8.89381
ENSMUSG00000003848.15	protein_coding	Nob1	2	OTTMUSG00000035977.1	chr8	HAVANA	gene	108139118	108151683	-	-1.5435	5.2838	-8.38948	3.70711e-08	2.44206e-06	8.89204
ENSMUSG00000022114.6	protein_coding	Spry2	2	OTTMUSG00000069591.1	chr14	HAVANA	gene	106129381	106134253	-	-1.56766	5.73138	-8.39244	3.68569e-08	2.44206e-06	8.88206
ENSMUSG00000010760.6	protein_coding	Phlda2	2	OTTMUSG00000024031.1	chr7	HAVANA	gene	143055282	143056887	-	-2.74865	2.89612	-8.34392	4.05348e-08	2.58519e-06	8.86884
ENSMUSG00000028413.14	protein_coding	B4galt1	2	OTTMUSG00000006610.1	chr4	HAVANA	gene	40804602	40854005	-	0.953972	7.43144	8.40261	3.61302e-08	2.4038e-06	8.8655
ENSMUSG00000032294.18	protein_coding	Pkm	2	OTTMUSG00000063298.1	chr9	HAVANA	gene	59563651	59586658	+	-1.07892	11.3213	-8.39022	3.70172e-08	2.44206e-06	8.84488
ENSMUSG00000036478.9	protein_coding	Btg1	2	OTTMUSG00000064512.1	chr10	HAVANA	gene	96452868	96458671	+	-1.06307	6.91655	-8.38169	3.76405e-08	2.46336e-06	8.82824
ENSMUSG00000024421.17	protein_coding	Lama3	2	OTTMUSG00000045059.1	chr18	HAVANA	gene	12466876	12716070	+	2.38678	7.30905	8.37755	3.79474e-08	2.46732e-06	8.81952
ENSMUSG00000037295.8	protein_coding	Ldlrap1	2	OTTMUSG00000011121.1	chr4	HAVANA	gene	134468865	134495335	-	-1.3122	5.99469	-8.34897	4.01352e-08	2.56789e-06	8.78175
ENSMUSG00000000385.9	protein_coding	Tmprss2	2	OTTMUSG00000071940.1	chr16	HAVANA	gene	97365882	97412395	-	3.09781	7.54743	8.35728	3.94857e-08	2.53443e-06	8.7793
ENSMUSG00000004268.12	protein_coding	Emg1	2	OTTMUSG00000023581.1	chr6	HAVANA	gene	124681048	124689141	-	-1.61103	5.98414	-8.33437	4.13023e-08	2.60921e-06	8.75873
ENSMUSG00000110344.2	protein_coding	Smim36	2	OTTMUSG00000001286.1	chr11	HAVANA	gene	90078509	90142081	+	-3.87149	-0.0933314	-8.98534	1.18151e-08	1.07666e-06	8.74698
ENSMUSG00000063696.8	processed_pseudogene	Gm8730	2	OTTMUSG00000061437.1	chr8	HAVANA	gene	103591477	103592430	-	-1.3601	7.38944	-8.33773	4.10312e-08	2.60854e-06	8.73796
ENSMUSG00000049502.18	protein_coding	Dtx3l	2	OTTMUSG00000023635.1	chr16	HAVANA	gene	35746881	35759521	-	1.06109	4.59592	8.30715	4.35738e-08	2.72691e-06	8.73654
ENSMUSG00000055415.9	protein_coding	Atp10b	2	OTTMUSG00000005449.1	chr11	HAVANA	gene	43040704	43153112	+	3.73209	3.47159	8.26597	4.72587e-08	2.885e-06	8.72932
ENSMUSG00000029780.15	protein_coding	Nt5c3	2	OTTMUSG00000023209.1	chr6	HAVANA	gene	56859385	56900917	-	-0.8593	5.96533	-8.32194	4.23246e-08	2.66539e-06	8.72814
ENSMUSG00000018983.10	protein_coding	E2f2	2	OTTMUSG00000009869.1	chr4	HAVANA	gene	135899705	135923368	+	-1.2358	4.51611	-8.28134	4.5847e-08	2.81635e-06	8.72252
ENSMUSG00000013483.15	protein_coding	Card14	2	OTTMUSG00000003913.1	chr11	HAVANA	gene	119198594	119236201	+	-3.16972	2.07355	-8.29665	4.44846e-08	2.75804e-06	8.71643
ENSMUSG00000031024.14	protein_coding	Dennd2b	2	OTTMUSG00000060125.1	chr7	HAVANA	gene	109123118	109302812	-	1.30605	4.52336	8.28281	4.5715e-08	2.81635e-06	8.69582
ENSMUSG00000108700.2	processed_pseudogene	Gm7482	2	OTTMUSG00000057933.1	chr7	HAVANA	gene	63460574	63461078	-	-4.33079	-1.8524	-9.53624	4.27327e-09	5.63003e-07	8.6947
ENSMUSG00000007817.16	protein_coding	Zmiz1	2	OTTMUSG00000034637.1	chr14	HAVANA	gene	25459609	25667167	+	1.07813	8.02396	8.31702	4.27363e-08	2.68288e-06	8.69353
ENSMUSG00000045362.9	protein_coding	Tnfrsf26	2	OTTMUSG00000060030.1	chr7	HAVANA	gene	143161396	143182459	-	-2.02704	6.15631	-8.29768	4.43944e-08	2.75804e-06	8.6849
ENSMUSG00000047215.15	protein_coding	Rpl9	2	OTTMUSG00000028344.1	chr5	HAVANA	gene	65545707	65548787	-	-1.23035	8.02996	-8.30545	4.37203e-08	2.72754e-06	8.6708
ENSMUSG00000036026.16	protein_coding	Tmem63b	2	OTTMUSG00000031349.1	chr17	HAVANA	gene	45971097	45997831	-	1.00253	7.77677	8.29022	4.50515e-08	2.78457e-06	8.64085
ENSMUSG00000028015.4	protein_coding	Ctso	2	OTTMUSG00000026582.1	chr3	HAVANA	gene	81839908	81864032	+	1.76427	3.61051	8.22521	5.12246e-08	3.06706e-06	8.63861
ENSMUSG00000078716.11	protein_coding	Tmem8b	2	OTTMUSG00000007050.1	chr4	HAVANA	gene	43668971	43692668	+	1.86425	3.0566	8.2134	5.24371e-08	3.09648e-06	8.62973
ENSMUSG00000019850.12	protein_coding	Tnfaip3	2	OTTMUSG00000018149.1	chr10	HAVANA	gene	18876658	18891405	-	2.04496	6.54775	8.27093	4.67985e-08	2.86601e-06	8.61583
ENSMUSG00000028698.14	protein_coding	Pik3r3	2	OTTMUSG00000009411.1	chr4	HAVANA	gene	116078815	116160253	+	1.71155	3.07704	8.1994	5.39123e-08	3.15687e-06	8.60007
ENSMUSG00000031527.8	protein_coding	Eri1	2	OTTMUSG00000061038.1	chr8	HAVANA	gene	35932407	35963350	-	-1.27984	5.92952	-8.24866	4.89027e-08	2.94978e-06	8.58627
ENSMUSG00000058558.13	protein_coding	Rpl5	2	OTTMUSG00000028907.1	chr5	HAVANA	gene	108048368	108056871	+	-1.17714	7.82319	-8.26193	4.7638e-08	2.89091e-06	8.58492
ENSMUSG00000027375.15	protein_coding	Mal	2	OTTMUSG00000016065.1	chr2	HAVANA	gene	127475146	127498615	-	1.89768	7.64733	8.25802	4.80068e-08	2.90448e-06	8.57816
ENSMUSG00000037440.9	protein_coding	Vnn1	2	OTTMUSG00000044612.1	chr10	HAVANA	gene	23770586	23781241	+	3.57572	5.92971	8.21571	5.21976e-08	3.09263e-06	8.54954
ENSMUSG00000023809.12	protein_coding	Rps6ka2	2	NA	chr17	HAVANA	gene	7292942	7570726	+	-1.63842	4.76867	-8.18994	5.49333e-08	3.19795e-06	8.54191
ENSMUSG00000006589.9	protein_coding	Aprt	2	OTTMUSG00000061857.1	chr8	HAVANA	gene	123301374	123303648	-	-1.61417	6.23957	-8.2244	5.13065e-08	3.06706e-06	8.53329
ENSMUSG00000019779.16	protein_coding	Frk	2	OTTMUSG00000063874.1	chr10	HAVANA	gene	34359395	34487274	+	1.02016	5.61986	8.21712	5.20514e-08	3.09263e-06	8.52473
ENSMUSG00000026204.16	protein_coding	Ptprn	2	OTTMUSG00000048596.1	chr1	HAVANA	gene	75223671	75241146	-	-3.51701	5.88967	-8.17723	5.63363e-08	3.22726e-06	8.52138
ENSMUSG00000025993.11	protein_coding	Slc40a1	2	OTTMUSG00000046528.1	chr1	HAVANA	gene	45947228	45965683	-	2.14997	4.45288	8.17663	5.64038e-08	3.22726e-06	8.51998
ENSMUSG00000047793.14	protein_coding	Sned1	2	OTTMUSG00000036435.1	chr1	HAVANA	gene	93163563	93228787	+	1.62555	4.60623	8.18211	5.57932e-08	3.2153e-06	8.5045
ENSMUSG00000031447.8	protein_coding	Lamp1	2	OTTMUSG00000060871.1	chr8	HAVANA	gene	13209161	13225338	+	0.86903	9.53875	8.22024	5.17311e-08	3.08324e-06	8.501
ENSMUSG00000029513.15	protein_coding	Prkab1	2	OTTMUSG00000014718.1	chr5	HAVANA	gene	116151645	116162567	-	-0.907074	6.43135	-8.2121	5.25719e-08	3.09648e-06	8.49886
ENSMUSG00000090215.11	protein_coding	Trim34b	2	OTTMUSG00000019188.1	chr7	HAVANA	gene	103978678	103986116	+	2.57527	0.582251	8.33533	4.12246e-08	2.60921e-06	8.49821
ENSMUSG00000027651.17	protein_coding	Rprd1b	2	OTTMUSG00000015886.1	chr2	HAVANA	gene	157870417	157974217	+	-0.99016	5.15984	-8.18139	5.58736e-08	3.2153e-06	8.48007
ENSMUSG00000001270.10	protein_coding	Ckb	2	OTTMUSG00000066365.1	chr12	HAVANA	gene	111635795	111638772	-	-2.20516	3.00482	-8.13078	6.17899e-08	3.42772e-06	8.47023
ENSMUSG00000039114.17	protein_coding	Nrn1	2	OTTMUSG00000027720.1	chr13	HAVANA	gene	36909335	36919105	-	-2.31469	4.88305	-8.15651	5.87045e-08	3.31015e-06	8.46832
ENSMUSG00000036285.11	protein_coding	Noa1	2	OTTMUSG00000026773.1	chr5	HAVANA	gene	77442029	77457931	-	-1.52216	4.91371	-8.16564	5.76484e-08	3.27973e-06	8.46463
ENSMUSG00000025290.18	protein_coding	Rps24	2	OTTMUSG00000068639.1	chr14	HAVANA	gene	24537193	24547027	+	-1.23599	8.27607	-8.1998	5.38689e-08	3.15687e-06	8.46003
ENSMUSG00000056724.16	protein_coding	Nbeal2	2	OTTMUSG00000032760.1	chr9	HAVANA	gene	110453857	110483229	-	1.66471	7.52093	8.19523	5.43599e-08	3.17379e-06	8.45439
ENSMUSG00000026657.18	protein_coding	Frmd4a	2	OTTMUSG00000010755.1	chr2	HAVANA	gene	4022528	4618854	+	-1.67705	5.45134	-8.15721	5.86229e-08	3.31015e-06	8.43472
ENSMUSG00000033149.18	protein_coding	Phldb2	1	OTTMUSG00000024715.1	chr16	HAVANA	gene	45566606	45773961	-	1.3654	9.22511	8.18663	5.52954e-08	3.2097e-06	8.43348
ENSMUSG00000036333.12	protein_coding	Kidins220	2	OTTMUSG00000066981.1	chr12	HAVANA	gene	25024924	25113151	+	1.05006	7.71578	8.18469	5.55089e-08	3.21278e-06	8.43073
ENSMUSG00000035948.14	protein_coding	Acss3	2	OTTMUSG00000023051.1	chr10	HAVANA	gene	106769378	106959529	-	2.53144	0.766061	8.17002	5.71498e-08	3.26063e-06	8.41632
ENSMUSG00000006576.17	protein_coding	Slc4a3	2	OTTMUSG00000019426.1	chr1	HAVANA	gene	75522910	75538816	+	1.9983	3.49491	8.08662	6.748e-08	3.64246e-06	8.38052
ENSMUSG00000012405.17	protein_coding	Rpl15	2	OTTMUSG00000022948.1	chr14	HAVANA	gene	4198305	4201873	+	-1.13629	7.36458	-8.15719	5.86249e-08	3.31015e-06	8.3783
ENSMUSG00000020135.14	protein_coding	Apc2	2	OTTMUSG00000000013.1	chr10	HAVANA	gene	80131811	80154097	+	2.05883	1.5788	8.09741	6.60412e-08	3.57827e-06	8.36602
ENSMUSG00000034684.13	protein_coding	Sema3f	2	OTTMUSG00000050787.1	chr9	HAVANA	gene	107558699	107587674	-	1.53311	7.1361	8.1499	5.94821e-08	3.33666e-06	8.36297
ENSMUSG00000041841.9	protein_coding	Rpl37	2	OTTMUSG00000069982.1	chr15	HAVANA	gene	5146127	5148622	+	-1.31526	7.47312	-8.14697	5.98299e-08	3.3468e-06	8.35767
ENSMUSG00000044768.17	protein_coding	Macir	2	OTTMUSG00000021769.1	chr1	HAVANA	gene	97534043	97589799	-	-0.910013	5.66861	-8.12849	6.20721e-08	3.43385e-06	8.35274
ENSMUSG00000025085.17	protein_coding	Ablim1	2	OTTMUSG00000016380.1	chr19	HAVANA	gene	57021165	57303351	-	1.46112	7.34901	8.14323	6.0276e-08	3.36236e-06	8.34925
ENSMUSG00000020674.18	protein_coding	Pxdn	2	OTTMUSG00000027521.1	chr12	HAVANA	gene	29987607	30067657	+	1.3506	7.39787	8.14101	6.05431e-08	3.36788e-06	8.34568
ENSMUSG00000026785.15	protein_coding	Pkn3	1	OTTMUSG00000016746.1	chr2	HAVANA	gene	29967696	29981034	+	-1.11296	5.30383	-8.10899	6.45328e-08	3.52727e-06	8.34056
ENSMUSG00000039328.12	protein_coding	Rnf122	2	OTTMUSG00000027149.1	chr8	HAVANA	gene	31601848	31621510	+	3.25941	1.22928	8.12421	6.26038e-08	3.45373e-06	8.30779
ENSMUSG00000031320.10	protein_coding	Rps4x	2	OTTMUSG00000018303.1	chrX	HAVANA	gene	101228547	101233000	-	-1.21817	8.68262	-8.12081	6.30297e-08	3.46442e-06	8.30131
ENSMUSG00000053716.10	protein_coding	Dusp7	2	OTTMUSG00000037684.1	chr9	HAVANA	gene	106245831	106252923	+	-1.2841	4.70486	-8.08076	6.8274e-08	3.66557e-06	8.301
ENSMUSG00000023249.16	protein_coding	Parp3	2	OTTMUSG00000033581.1	chr9	HAVANA	gene	106347521	106354148	-	1.23874	5.7584	8.09687	6.6112e-08	3.57827e-06	8.28607
ENSMUSG00000057738.15	protein_coding	Sptan1	2	OTTMUSG00000016728.1	chr2	HAVANA	gene	29855572	29921463	+	0.869955	9.6086	8.10815	6.46413e-08	3.52727e-06	8.27647
ENSMUSG00000058064.7	processed_pseudogene	Gm10036	2	OTTMUSG00000072885.1	chr18	HAVANA	gene	15965851	15966384	+	-1.44563	4.57674	-8.06029	7.11272e-08	3.80854e-06	8.26756
ENSMUSG00000048960.14	protein_coding	Prex2	2	OTTMUSG00000047927.1	chr1	HAVANA	gene	11063689	11373905	+	4.32407	0.339582	8.23361	5.03799e-08	3.02976e-06	8.2609
ENSMUSG00000025279.8	protein_coding	Dnase1l3	1	OTTMUSG00000024054.1	chr14	HAVANA	gene	14475200	14505240	+	2.7073	1.06532	8.1035	6.52428e-08	3.55041e-06	8.25611
ENSMUSG00000044847.14	protein_coding	Lsm11	2	OTTMUSG00000005480.1	chr11	HAVANA	gene	45819096	45835762	-	-1.78034	3.73153	-8.02701	7.60318e-08	3.99636e-06	8.25095
ENSMUSG00000092300.8	protein_coding	Cdk3	2	OTTMUSG00000003837.1	chr11	HAVANA	gene	116106829	116111113	+	-1.53229	2.61142	-8.00898	7.88343e-08	4.07483e-06	8.23014
ENSMUSG00000045165.7	protein_coding	AI467606	2	OTTMUSG00000058495.1	chr7	HAVANA	gene	126690531	126693158	+	-1.3481	4.70307	-8.03806	7.4366e-08	3.93983e-06	8.22151
ENSMUSG00000029334.15	protein_coding	Prkg2	1	OTTMUSG00000033394.1	chr5	HAVANA	gene	99077632	99185210	-	-4.46779	5.9128	-8.0202	7.70788e-08	4.0193e-06	8.19306
ENSMUSG00000053886.5	protein_coding	Sh2d4a	2	OTTMUSG00000029939.1	chr8	HAVANA	gene	68729219	68800351	+	1.73639	5.94892	8.05282	7.21987e-08	3.84535e-06	8.1882
ENSMUSG00000078920.4	protein_coding	Ifi47	2	OTTMUSG00000005538.1	chr11	HAVANA	gene	48967414	48987801	+	2.29049	1.63176	8.01957	7.71753e-08	4.0193e-06	8.18395
ENSMUSG00000031668.15	protein_coding	Eif2ak3	2	OTTMUSG00000031093.1	chr6	HAVANA	gene	70821499	70882229	+	0.973982	6.18199	8.04466	7.33896e-08	3.89841e-06	8.16528
ENSMUSG00000104960.4	lncRNA	Snhg8	2	OTTMUSG00000052554.1	chr3	HAVANA	gene	123301192	123302578	-	-1.94978	4.16951	-7.98068	8.34492e-08	4.24151e-06	8.14791
ENSMUSG00000118669.2	protein_coding	Arvcf	2	OTTMUSG00000026041.1	chr16	HAVANA	gene	18166046	18225826	+	1.54848	4.54736	8.00174	7.99883e-08	4.1073e-06	8.14161
ENSMUSG00000028798.17	protein_coding	Eif3i	2	OTTMUSG00000009520.1	chr4	HAVANA	gene	129485753	129494441	-	-1.16655	6.57502	-8.02969	7.5624e-08	3.9959e-06	8.13012
ENSMUSG00000038816.15	protein_coding	Ctnnal1	2	OTTMUSG00000007317.1	chr4	HAVANA	gene	56810935	56865188	-	-1.50933	6.79086	-8.02759	7.59434e-08	3.99636e-06	8.12346
ENSMUSG00000115009.3	lncRNA	G930009F23Rik	2	OTTMUSG00000070460.1	chr15	HAVANA	gene	38385678	38462153	-	1.71651	4.86317	7.99104	8.1727e-08	4.17517e-06	8.10324
ENSMUSG00000062997.7	protein_coding	Rpl35	2	OTTMUSG00000012348.1	chr2	HAVANA	gene	38891592	38895636	-	-1.41649	7.01286	-8.0173	7.75285e-08	4.02224e-06	8.10104
ENSMUSG00000002057.5	protein_coding	Foxn1	2	OTTMUSG00000000142.1	chr11	HAVANA	gene	78248403	78277384	-	3.53523	1.75022	7.95746	8.74433e-08	4.37952e-06	8.09793
ENSMUSG00000028234.7	protein_coding	Rps20	2	OTTMUSG00000004410.1	chr4	HAVANA	gene	3831334	3835665	-	-1.36044	8.50086	-8.0196	7.71707e-08	4.0193e-06	8.09757
ENSMUSG00000097906.2	processed_pseudogene	Gm9625	2	OTTMUSG00000042806.1	chr13	HAVANA	gene	67958365	67959319	+	-1.3782	6.67158	-8.00825	7.89492e-08	4.07483e-06	8.08563
ENSMUSG00000031951.9	protein_coding	Tmem231	2	OTTMUSG00000061806.1	chr8	HAVANA	gene	112638643	112660513	-	1.13534	3.88517	7.95525	8.78334e-08	4.38642e-06	8.08071
ENSMUSG00000118662.2	protein_coding	Tctn2	2	NA	chr5	HAVANA	gene	124736812	124765803	+	1.00841	4.48098	7.96972	8.531e-08	4.31418e-06	8.07813
ENSMUSG00000000126.12	protein_coding	Wnt9a	2	OTTMUSG00000005790.1	chr11	HAVANA	gene	59197754	59224378	+	3.788	2.00726	7.9443	8.9794e-08	4.45303e-06	8.07289
ENSMUSG00000032000.18	protein_coding	Birc3	2	OTTMUSG00000020585.1	chr9	HAVANA	gene	7848700	7873187	-	1.21959	3.02817	7.927	9.29835e-08	4.57515e-06	8.07072
ENSMUSG00000029614.14	protein_coding	Rpl6	2	OTTMUSG00000026261.1	chr5	HAVANA	gene	121342544	121347304	+	-1.24527	8.4311	-8.00451	7.95457e-08	4.09507e-06	8.06709
ENSMUSG00000001768.17	protein_coding	Rin2	2	OTTMUSG00000004057.1	chr2	HAVANA	gene	145517135	145729536	+	1.22264	6.17518	7.99243	8.1499e-08	4.17417e-06	8.05866
ENSMUSG00000018509.9	protein_coding	Cenpv	2	OTTMUSG00000005860.1	chr11	HAVANA	gene	62415772	62430087	-	-1.1591	4.86784	-7.95727	8.74767e-08	4.37952e-06	8.05137
ENSMUSG00000046814.4	protein_coding	Gchfr	2	OTTMUSG00000015763.1	chr2	HAVANA	gene	118998254	119002871	+	-1.43858	4.01104	-7.93047	9.23349e-08	4.55443e-06	8.04396
ENSMUSG00000097222.5	lncRNA	Gata6os	2	OTTMUSG00000071784.1	chr18	HAVANA	gene	10987944	11053256	-	2.50878	3.03776	7.90401	9.74054e-08	4.73457e-06	8.02807
ENSMUSG00000005514.15	protein_coding	Por	1	OTTMUSG00000029621.1	chr5	HAVANA	gene	135698887	135764180	+	1.52558	7.83699	7.98208	8.32142e-08	4.24032e-06	8.02297
ENSMUSG00000015312.10	protein_coding	Gadd45b	2	OTTMUSG00000065049.1	chr10	HAVANA	gene	80765907	80768038	+	2.01031	5.97367	7.96532	8.60693e-08	4.33071e-06	8.01461
ENSMUSG00000031388.15	protein_coding	Naa10	2	OTTMUSG00000017704.1	chrX	HAVANA	gene	72960479	72965550	-	-1.49437	4.49256	-7.92369	9.36076e-08	4.59457e-06	8.0081
ENSMUSG00000032399.9	protein_coding	Rpl4	2	OTTMUSG00000062590.1	chr9	HAVANA	gene	64080657	64085948	+	-1.2119	10.0967	-7.97396	8.45852e-08	4.28836e-06	8.00705
ENSMUSG00000037846.19	protein_coding	Rtkn2	2	OTTMUSG00000031778.1	chr10	HAVANA	gene	67815400	67895570	+	-2.72968	2.94055	-7.88713	1.0079e-07	4.83674e-06	7.99146
ENSMUSG00000052911.10	protein_coding	Lamb2	2	OTTMUSG00000050824.1	chr9	HAVANA	gene	108356935	108367729	+	1.51045	8.27981	7.96636	8.58897e-08	4.33071e-06	7.99007
ENSMUSG00000025572.19	protein_coding	Tmc6	2	OTTMUSG00000003673.1	chr11	HAVANA	gene	117656814	117673024	-	0.978462	5.78881	7.94408	8.98344e-08	4.45303e-06	7.97567
ENSMUSG00000036002.13	protein_coding	Atosb	2	OTTMUSG00000006708.1	chr4	HAVANA	gene	43032414	43046220	-	2.01952	4.87557	7.9133	9.55931e-08	4.66914e-06	7.97194
ENSMUSG00000024972.17	protein_coding	Lgals12	2	OTTMUSG00000034770.1	chr19	HAVANA	gene	7574025	7584558	-	2.20628	0.985661	7.90634	9.69471e-08	4.72375e-06	7.9434
ENSMUSG00000024130.17	protein_coding	Abca3	2	OTTMUSG00000031259.1	chr17	HAVANA	gene	24570924	24629175	+	0.992693	7.92449	7.93442	9.16009e-08	4.52938e-06	7.92515
ENSMUSG00000066362.6	processed_pseudogene	Rps13-ps1	2	OTTMUSG00000044467.1	chr8	HAVANA	gene	87774317	87774854	+	-1.57281	4.55937	-7.88631	1.00957e-07	4.83674e-06	7.91598
ENSMUSG00000046157.14	protein_coding	Tmem229b	2	OTTMUSG00000037736.1	chr12	HAVANA	gene	79008569	79054401	-	2.33503	1.03011	7.88652	1.00914e-07	4.83674e-06	7.90417
ENSMUSG00000031483.9	protein_coding	Erlin2	2	OTTMUSG00000060978.1	chr8	HAVANA	gene	27513289	27530356	+	0.842503	7.12264	7.91948	9.44079e-08	4.62252e-06	7.89824
ENSMUSG00000030101.16	protein_coding	Sumf1	2	OTTMUSG00000035993.1	chr6	HAVANA	gene	108083989	108162543	-	0.922893	5.79208	7.89847	9.85026e-08	4.76477e-06	7.88199
ENSMUSG00000062151.14	protein_coding	Unc13c	2	OTTMUSG00000044794.1	chr9	HAVANA	gene	73386704	73876248	-	-2.95995	2.35236	-7.83895	1.11133e-07	5.27383e-06	7.87971
ENSMUSG00000019948.5	protein_coding	Actr6	2	OTTMUSG00000064010.1	chr10	HAVANA	gene	89547833	89568157	-	-1.10133	3.28852	-7.8095	1.1799e-07	5.4728e-06	7.83109
ENSMUSG00000004264.18	protein_coding	Phb2	2	OTTMUSG00000020695.1	chr6	HAVANA	gene	124689299	124693913	+	-1.10769	7.79168	-7.88751	1.00712e-07	4.83674e-06	7.83099
ENSMUSG00000098915.2	processed_pseudogene	Rpl15-ps2	2	OTTMUSG00000044768.1	chr9	HAVANA	gene	71968219	71968831	+	-1.44106	3.29468	-7.7993	1.20467e-07	5.54591e-06	7.81324
ENSMUSG00000073702.12	protein_coding	Rpl31	2	OTTMUSG00000050276.1	chr1	HAVANA	gene	39406923	39410992	+	-1.35638	7.091	-7.87631	1.03023e-07	4.92394e-06	7.81266
ENSMUSG00000081640.2	processed_pseudogene	Rplp0-ps1	2	OTTMUSG00000023811.1	chr3	HAVANA	gene	93185448	93186380	+	-1.43434	2.76611	-7.79484	1.21565e-07	5.57084e-06	7.812
ENSMUSG00000020407.14	protein_coding	Upp1	2	OTTMUSG00000005150.1	chr11	HAVANA	gene	9068103	9086170	+	-3.094	1.45931	-7.89879	9.84389e-08	4.76477e-06	7.80801
ENSMUSG00000037379.8	protein_coding	Spon2	2	OTTMUSG00000055359.1	chr5	HAVANA	gene	33355528	33375799	-	4.25819	2.34289	7.80708	1.18573e-07	5.4728e-06	7.79911
ENSMUSG00000029093.15	protein_coding	Sorcs2	2	OTTMUSG00000028018.1	chr5	HAVANA	gene	36174524	36555483	-	2.98648	2.68293	7.78705	1.23511e-07	5.6431e-06	7.79633
ENSMUSG00000021687.15	protein_coding	Scamp1	2	OTTMUSG00000033839.1	chr13	HAVANA	gene	94337818	94422365	-	0.938581	6.4563	7.85248	1.08123e-07	5.1554e-06	7.76871
ENSMUSG00000021025.9	protein_coding	Nfkbia	2	OTTMUSG00000065449.1	chr12	HAVANA	gene	55536195	55539432	-	1.2295	5.13861	7.82447	1.14451e-07	5.35756e-06	7.76187
ENSMUSG00000041688.17	protein_coding	Amot	2	OTTMUSG00000018901.1	chrX	HAVANA	gene	144229421	144288177	-	1.4378	6.05642	7.84517	1.0974e-07	5.22007e-06	7.76045
ENSMUSG00000020661.17	protein_coding	Dnmt3a	1	OTTMUSG00000037610.1	chr12	HAVANA	gene	3856007	3964443	+	0.87994	5.3296	7.82425	1.14503e-07	5.35756e-06	7.74648
ENSMUSG00000042613.10	protein_coding	Pbxip1	2	OTTMUSG00000022073.1	chr3	HAVANA	gene	89344013	89358259	+	1.92313	5.12237	7.80825	1.18292e-07	5.4728e-06	7.72785
ENSMUSG00000032194.10	protein_coding	Kank2	2	OTTMUSG00000063571.1	chr9	HAVANA	gene	21678080	21710040	-	0.889836	6.87921	7.83266	1.12564e-07	5.32908e-06	7.72526
ENSMUSG00000034248.8	protein_coding	Slc25a37	2	OTTMUSG00000044494.1	chr14	HAVANA	gene	69479297	69522561	-	-0.970669	7.13827	-7.8272	1.13818e-07	5.35756e-06	7.71246
ENSMUSG00000047501.4	protein_coding	Cldn4	2	OTTMUSG00000055820.1	chr5	HAVANA	gene	134973973	134975788	-	2.18677	8.34351	7.82579	1.14145e-07	5.35756e-06	7.70392
ENSMUSG00000059291.16	protein_coding	Rpl11	2	OTTMUSG00000009855.1	chr4	HAVANA	gene	135755576	135780739	-	-1.36638	7.74746	-7.82498	1.14333e-07	5.35756e-06	7.70385
ENSMUSG00000071552.6	protein_coding	Tigit	2	OTTMUSG00000071475.1	chr16	HAVANA	gene	43469230	43484509	-	-2.91099	4.83477	-7.75635	1.31493e-07	5.90422e-06	7.68576
ENSMUSG00000022895.17	protein_coding	Ets2	2	OTTMUSG00000027024.1	chr16	HAVANA	gene	95502942	95522095	+	1.0478	7.86116	7.81414	1.16883e-07	5.44348e-06	7.6798
ENSMUSG00000067158.10	protein_coding	Col4a4	2	OTTMUSG00000021695.1	chr1	HAVANA	gene	82426144	82564570	-	4.05378	-0.370518	8.08477	6.77301e-08	3.64614e-06	7.67938
ENSMUSG00000057967.13	protein_coding	Fgf18	2	OTTMUSG00000005390.1	chr11	HAVANA	gene	33067430	33097400	-	6.3872	-0.44112	9.05694	1.033e-08	9.90099e-07	7.66627
ENSMUSG00000042807.16	protein_coding	Hecw2	2	OTTMUSG00000029246.1	chr1	HAVANA	gene	53846035	54234327	-	3.00815	-0.411139	8.05508	7.18737e-08	3.83825e-06	7.64806
ENSMUSG00000032679.13	protein_coding	Cd59a	2	OTTMUSG00000014930.1	chr2	HAVANA	gene	103926146	103945699	+	1.68376	1.51123	7.72405	1.40468e-07	6.18246e-06	7.6445
ENSMUSG00000057322.13	protein_coding	Rpl38	2	OTTMUSG00000003385.1	chr11	HAVANA	gene	114559350	114563157	+	-1.25761	6.53293	-7.7855	1.23901e-07	5.6431e-06	7.63375
ENSMUSG00000003955.9	protein_coding	Fam162a	2	OTTMUSG00000071899.1	chr16	HAVANA	gene	35864131	35891964	-	-1.15036	5.60968	-7.77295	1.27113e-07	5.73324e-06	7.63175
ENSMUSG00000022306.10	protein_coding	Zfpm2	2	OTTMUSG00000070566.1	chr15	HAVANA	gene	40518431	40967988	+	0.980004	6.90935	7.78516	1.23987e-07	5.6431e-06	7.62678
ENSMUSG00000031373.5	protein_coding	Car5b	2	OTTMUSG00000019511.1	chrX	HAVANA	gene	162759818	162810993	-	-0.923015	5.63116	-7.76992	1.279e-07	5.75579e-06	7.61906
ENSMUSG00000021133.10	protein_coding	Susd6	2	OTTMUSG00000065646.1	chr12	HAVANA	gene	80837284	80927609	+	0.845564	6.6781	7.7764	1.26222e-07	5.73178e-06	7.61021
ENSMUSG00000015850.12	protein_coding	Adamtsl4	2	OTTMUSG00000027489.1	chr3	HAVANA	gene	95583511	95595228	-	1.75826	4.13676	7.71996	1.41648e-07	6.22073e-06	7.60933
ENSMUSG00000020423.7	protein_coding	Btg2	2	OTTMUSG00000034725.1	chr1	HAVANA	gene	134002908	134006858	-	2.0013	4.46921	7.73069	1.38573e-07	6.11247e-06	7.59799
ENSMUSG00000006333.15	protein_coding	Rps9	2	OTTMUSG00000022990.1	chr7	HAVANA	gene	3706992	3709896	+	-1.23591	9.17838	-7.7737	1.26918e-07	5.73324e-06	7.596
ENSMUSG00000029810.16	protein_coding	Tmem176b	2	OTTMUSG00000057390.1	chr6	HAVANA	gene	48810752	48818430	-	1.23078	8.36899	7.77368	1.26924e-07	5.73324e-06	7.59597
ENSMUSG00000069892.10	protein_coding	9930111J21Rik2	2	OTTMUSG00000005540.1	chr11	HAVANA	gene	48906701	48942069	-	2.27947	3.75338	7.69846	1.48027e-07	6.40259e-06	7.59317
ENSMUSG00000006219.13	protein_coding	Fblim1	2	OTTMUSG00000010344.1	chr4	HAVANA	gene	141303373	141333407	-	1.94789	6.00098	7.74666	1.34121e-07	5.99338e-06	7.57403
ENSMUSG00000030894.6	protein_coding	Tpp1	2	OTTMUSG00000060349.1	chr7	HAVANA	gene	105394018	105401442	-	0.92797	7.04424	7.75117	1.3289e-07	5.9536e-06	7.55507
ENSMUSG00000032009.9	protein_coding	Sesn3	2	OTTMUSG00000021054.1	chr9	HAVANA	gene	14186363	14244397	+	1.83553	5.94818	7.73827	1.36441e-07	6.07191e-06	7.55233
ENSMUSG00000029119.10	protein_coding	Man2b2	1	OTTMUSG00000024727.1	chr5	HAVANA	gene	36964265	36987997	-	1.26368	6.5184	7.74573	1.34377e-07	5.99338e-06	7.55054
ENSMUSG00000042350.14	protein_coding	Arel1	1	OTTMUSG00000035485.1	chr12	HAVANA	gene	84964922	85017674	-	0.860349	5.83059	7.73305	1.37904e-07	6.10128e-06	7.54116
ENSMUSG00000022664.12	protein_coding	Slc35a5	2	OTTMUSG00000024963.1	chr16	HAVANA	gene	44959936	44979069	-	0.992866	4.84	7.70349	1.46509e-07	6.36442e-06	7.52076
ENSMUSG00000058600.14	protein_coding	Rpl30	2	OTTMUSG00000023325.1	chr15	HAVANA	gene	34440651	34443786	-	-1.33066	7.09108	-7.73266	1.38015e-07	6.10128e-06	7.51995
ENSMUSG00000037706.18	protein_coding	Cd81	2	OTTMUSG00000031887.1	chr7	HAVANA	gene	142606476	142621671	+	1.08259	9.29269	7.73568	1.37166e-07	6.09067e-06	7.51831
ENSMUSG00000034438.17	protein_coding	Gbp8	2	OTTMUSG00000053799.1	chr5	HAVANA	gene	105162016	105287406	-	3.33498	1.10333	7.71412	1.43352e-07	6.26804e-06	7.50999
ENSMUSG00000024998.18	protein_coding	Plce1	1	OTTMUSG00000043393.1	chr19	HAVANA	gene	38469557	38773474	+	-1.72633	6.41521	-7.71244	1.43846e-07	6.27597e-06	7.49508
ENSMUSG00000028811.13	protein_coding	Yars1	2	OTTMUSG00000009617.1	chr4	HAVANA	gene	129083553	129113400	+	-1.23573	6.56071	-7.71543	1.4297e-07	6.26501e-06	7.49163
ENSMUSG00000026463.18	protein_coding	Atp2b4	2	OTTMUSG00000016442.1	chr1	HAVANA	gene	133627195	133728779	-	2.37969	2.3767	7.63298	1.69339e-07	7.06495e-06	7.48528
ENSMUSG00000062604.12	protein_coding	Srpk2	2	OTTMUSG00000053492.1	chr5	HAVANA	gene	23708262	23889615	-	1.13972	6.41378	7.70953	1.44708e-07	6.29982e-06	7.47622
ENSMUSG00000032719.5	protein_coding	Sbspon	2	OTTMUSG00000026417.1	chr1	HAVANA	gene	15924086	15962946	-	5.12426	-1.6486	8.67275	2.14025e-08	1.6113e-06	7.47376
ENSMUSG00000071454.14	protein_coding	Dtnb	1	OTTMUSG00000037895.1	chr12	HAVANA	gene	3622381	3831796	+	-0.868068	4.9177	-7.67905	1.5404e-07	6.61973e-06	7.46497
ENSMUSG00000033917.16	protein_coding	Gde1	2	OTTMUSG00000023306.1	chr7	HAVANA	gene	118287768	118305001	-	1.63957	6.53894	7.70019	1.47503e-07	6.3937e-06	7.46202
ENSMUSG00000106073.2	TEC	Gm42892	2	OTTMUSG00000054582.1	chr3	HAVANA	gene	116734007	116737979	-	2.6988	1.03199	7.66419	1.58811e-07	6.78111e-06	7.45575
ENSMUSG00000048796.8	protein_coding	Cyb561d1	2	OTTMUSG00000007192.1	chr3	HAVANA	gene	108103003	108108528	-	1.065	3.53618	7.6271	1.71401e-07	7.09757e-06	7.4464
ENSMUSG00000049823.10	protein_coding	Zbtb12	2	OTTMUSG00000037274.1	chr17	HAVANA	gene	35098459	35115843	+	-1.00969	4.45229	-7.64811	1.64149e-07	6.93512e-06	7.43587
ENSMUSG00000021066.10	protein_coding	Atl1	2	OTTMUSG00000065769.1	chr12	HAVANA	gene	69939388	70013191	+	1.72403	2.44561	7.59847	1.8182e-07	7.30273e-06	7.42358
ENSMUSG00000020389.20	protein_coding	Cdkl3	1	OTTMUSG00000005618.1	chr11	HAVANA	gene	51895048	51980611	+	1.37584	2.38217	7.59906	1.81601e-07	7.30273e-06	7.42081
ENSMUSG00000049517.9	protein_coding	Rps23	2	OTTMUSG00000068330.1	chr13	HAVANA	gene	91071077	91073069	+	-1.22079	7.4298	-7.68617	1.51806e-07	6.53776e-06	7.41916
ENSMUSG00000039942.16	protein_coding	Ptger4	2	OTTMUSG00000027987.1	chr15	HAVANA	gene	5236142	5273668	-	2.59309	1.76418	7.60789	1.78321e-07	7.23456e-06	7.41756
ENSMUSG00000063320.12	protein_coding	Uqcc6	2	OTTMUSG00000040006.1	chr10	HAVANA	gene	82455685	82459062	-	-1.81837	1.59509	-7.61919	1.74217e-07	7.15899e-06	7.41657
ENSMUSG00000068329.13	protein_coding	Htra2	2	OTTMUSG00000022486.1	chr6	HAVANA	gene	83028247	83032254	-	-1.25331	6.01208	-7.67053	1.56757e-07	6.72208e-06	7.41232
ENSMUSG00000070643.12	protein_coding	Sox13	2	OTTMUSG00000026807.1	chr1	HAVANA	gene	133310041	133352115	-	-1.15833	4.82187	-7.63677	1.68023e-07	7.03998e-06	7.40468
ENSMUSG00000026773.20	protein_coding	Pfkfb3	2	OTTMUSG00000011314.1	chr2	HAVANA	gene	11476244	11558888	-	1.44478	4.36516	7.6255	1.71965e-07	7.09757e-06	7.39439
ENSMUSG00000023027.14	protein_coding	Atf1	2	OTTMUSG00000036768.1	chr15	HAVANA	gene	100125700	100159125	+	-1.02581	5.68172	-7.65632	1.61401e-07	6.86246e-06	7.39324
ENSMUSG00000095098.3	protein_coding	Ccdc85b	2	OTTMUSG00000074357.1	chr19	HAVANA	gene	5503208	5507922	-	-1.11202	5.48306	-7.64877	1.63925e-07	6.93512e-06	7.38514
ENSMUSG00000033327.19	protein_coding	Tnxb	2	OTTMUSG00000037253.1	chr17	HAVANA	gene	34879431	34938789	+	2.19007	8.46713	7.66853	1.57402e-07	6.73533e-06	7.38122
ENSMUSG00000045636.17	protein_coding	Mtus1	2	OTTMUSG00000031646.1	chr8	HAVANA	gene	41443951	41586763	-	1.34433	5.36068	7.63976	1.66993e-07	7.02565e-06	7.37233
ENSMUSG00000029832.17	protein_coding	Nfe2l3	2	OTTMUSG00000034271.1	chr6	HAVANA	gene	51409650	51435748	+	1.4329	3.59927	7.59808	1.81967e-07	7.30273e-06	7.36414
ENSMUSG00000055485.7	protein_coding	Mtcl2	2	OTTMUSG00000016168.1	chr2	HAVANA	gene	156857719	156921174	-	1.35506	4.03656	7.58631	1.86443e-07	7.41729e-06	7.34357
ENSMUSG00000029036.19	protein_coding	Atad3a	2	OTTMUSG00000010851.1	chr4	HAVANA	gene	155825098	155845550	-	-1.27582	6.04787	-7.63599	1.68293e-07	7.03998e-06	7.34313
ENSMUSG00000026594.15	protein_coding	Ralgps2	2	OTTMUSG00000049722.1	chr1	HAVANA	gene	156631736	156767196	-	-0.828458	6.70944	-7.64343	1.65735e-07	6.98738e-06	7.33806
ENSMUSG00000023186.15	protein_coding	Vwa5a	2	OTTMUSG00000027411.1	chr9	HAVANA	gene	38629564	38654633	+	1.88242	5.60405	7.62562	1.71923e-07	7.09757e-06	7.32782
ENSMUSG00000068921.15	protein_coding	Dap3	1	OTTMUSG00000031317.1	chr3	HAVANA	gene	88828110	88858488	-	-0.700623	6.22164	-7.62847	1.70918e-07	7.09757e-06	7.31375
ENSMUSG00000023367.15	protein_coding	Tmem176a	2	OTTMUSG00000057391.1	chr6	HAVANA	gene	48817853	48824005	+	1.15087	7.5971	7.63571	1.68389e-07	7.03998e-06	7.31342
ENSMUSG00000021003.11	protein_coding	Galc	2	OTTMUSG00000065746.1	chr12	HAVANA	gene	98168553	98225718	-	0.923704	5.90454	7.62498	1.7215e-07	7.09757e-06	7.31115
ENSMUSG00000037652.16	protein_coding	Phc3	2	OTTMUSG00000023470.1	chr3	HAVANA	gene	30953520	31023564	-	0.857392	6.54429	7.62471	1.72247e-07	7.09757e-06	7.30131
ENSMUSG00000027330.17	protein_coding	Cdc25b	2	OTTMUSG00000016040.1	chr2	HAVANA	gene	131028869	131040417	+	-1.7592	6.44759	-7.61471	1.75832e-07	7.19224e-06	7.29073
ENSMUSG00000093904.3	protein_coding	Tomm20	2	OTTMUSG00000061628.1	chr8	HAVANA	gene	127657417	127672594	-	-1.05457	6.39843	-7.61232	1.76699e-07	7.19224e-06	7.27927
ENSMUSG00000019087.14	protein_coding	Atp6ap1	2	OTTMUSG00000017676.1	chrX	HAVANA	gene	73340703	73348327	+	0.992251	7.53682	7.61853	1.74453e-07	7.15899e-06	7.27747
ENSMUSG00000084349.4	processed_pseudogene	Rpl3-ps1	2	OTTMUSG00000017075.1	chrX	HAVANA	gene	13068810	13070019	+	-1.24203	5.67447	-7.59982	1.81317e-07	7.30273e-06	7.27549
ENSMUSG00000029576.18	protein_coding	Radil	1	OTTMUSG00000026074.1	chr5	HAVANA	gene	142470594	142536853	-	2.79959	0.471275	7.5994	1.81474e-07	7.30273e-06	7.27145
ENSMUSG00000049882.11	protein_coding	Vcpkmt	2	OTTMUSG00000074714.1	chr12	HAVANA	gene	69624402	69629884	-	-1.624	3.55491	-7.53341	2.08001e-07	8.04751e-06	7.27005
ENSMUSG00000063077.16	protein_coding	Kif1b	2	OTTMUSG00000010170.1	chr4	HAVANA	gene	149260776	149392150	-	1.02441	7.54083	7.61309	1.76421e-07	7.19224e-06	7.26677
ENSMUSG00000062328.9	protein_coding	Rpl17	2	OTTMUSG00000073683.1	chr18	HAVANA	gene	75131629	75136452	+	-1.2427	8.27655	-7.61277	1.76535e-07	7.19224e-06	7.26361
ENSMUSG00000037661.15	protein_coding	Gpr160	2	OTTMUSG00000022043.1	chr3	HAVANA	gene	30910099	30951341	+	2.15597	0.882914	7.57941	1.89117e-07	7.45781e-06	7.2634
ENSMUSG00000043542.13	protein_coding	Zc2hc1a	2	OTTMUSG00000051307.1	chr3	HAVANA	gene	7568543	7618896	+	1.11583	5.13224	7.58571	1.86673e-07	7.41729e-06	7.26092
ENSMUSG00000025366.9	protein_coding	Esyt1	2	OTTMUSG00000064819.1	chr10	HAVANA	gene	128345834	128361740	-	0.895515	7.82523	7.60751	1.78462e-07	7.23456e-06	7.25321
ENSMUSG00000025260.11	protein_coding	Hsd17b10	2	OTTMUSG00000019648.1	chrX	HAVANA	gene	150784841	150787438	+	-0.943667	5.47679	-7.58405	1.87313e-07	7.428e-06	7.24986
ENSMUSG00000063316.14	protein_coding	Rpl27	2	OTTMUSG00000002868.1	chr11	HAVANA	gene	101333124	101336355	+	-1.35364	6.16504	-7.58987	1.85077e-07	7.39789e-06	7.24019
ENSMUSG00000037855.16	protein_coding	Zfp365	2	OTTMUSG00000027948.1	chr10	HAVANA	gene	67721933	67748492	-	-2.59284	2.86158	-7.50272	2.2167e-07	8.45358e-06	7.23172
ENSMUSG00000009291.14	protein_coding	Pttg1ip	2	OTTMUSG00000035073.1	chr10	HAVANA	gene	77417554	77434566	+	1.18309	8.01164	7.59158	1.84424e-07	7.38656e-06	7.21974
ENSMUSG00000039001.13	protein_coding	Rps21	2	OTTMUSG00000016278.1	chr2	HAVANA	gene	179899170	179900238	+	-1.1862	7.32053	-7.58668	1.86299e-07	7.41729e-06	7.21336
ENSMUSG00000041439.16	protein_coding	Mfsd6	2	OTTMUSG00000033382.1	chr1	HAVANA	gene	52695445	52766621	-	0.954783	6.78121	7.57787	1.8972e-07	7.45781e-06	7.19982
ENSMUSG00000034981.10	protein_coding	Parm1	2	OTTMUSG00000035368.1	chr5	HAVANA	gene	91665474	91774753	+	1.52193	7.41799	7.5774	1.89904e-07	7.45781e-06	7.19623
ENSMUSG00000034908.17	protein_coding	Sidt2	2	OTTMUSG00000028905.1	chr9	HAVANA	gene	45849155	45866556	-	0.860491	7.30258	7.57755	1.89846e-07	7.45781e-06	7.19349
ENSMUSG00000017404.13	protein_coding	Rpl19	2	OTTMUSG00000002909.1	chr11	HAVANA	gene	97917536	97921318	+	-1.18167	8.06199	-7.57734	1.89927e-07	7.45781e-06	7.19041
ENSMUSG00000046949.17	protein_coding	Nqo2	2	OTTMUSG00000067412.1	chr13	HAVANA	gene	34148670	34172426	+	-0.902179	5.57192	-7.55599	1.985e-07	7.74883e-06	7.18916
ENSMUSG00000054008.10	protein_coding	Ndst1	2	OTTMUSG00000073578.1	chr18	HAVANA	gene	60817566	60881722	-	0.952413	7.39373	7.56751	1.93826e-07	7.59601e-06	7.17182
ENSMUSG00000035632.17	protein_coding	Cnot3	2	OTTMUSG00000027888.1	chr7	HAVANA	gene	3648267	3664108	+	-0.662164	6.50814	-7.55744	1.97904e-07	7.74069e-06	7.16352
ENSMUSG00000035713.16	protein_coding	Usp35	2	OTTMUSG00000029537.1	chr7	HAVANA	gene	96958587	96981227	-	1.60307	3.13158	7.47462	2.35e-07	8.82949e-06	7.16112
ENSMUSG00000026283.14	protein_coding	Ing5	2	OTTMUSG00000048689.1	chr1	HAVANA	gene	93731687	93749823	+	-0.987374	4.84115	-7.52382	2.12175e-07	8.16784e-06	7.1604
ENSMUSG00000028455.16	protein_coding	Stoml2	2	OTTMUSG00000006709.1	chr4	HAVANA	gene	43027690	43031710	-	-1.14983	5.62336	-7.53402	2.07739e-07	8.04751e-06	7.14227
ENSMUSG00000063354.8	protein_coding	Slc39a4	2	OTTMUSG00000071049.1	chr15	HAVANA	gene	76496583	76501584	-	1.6039	6.94545	7.53859	2.05781e-07	8.00189e-06	7.12801
ENSMUSG00000003923.15	protein_coding	Tfam	1	OTTMUSG00000031039.1	chr10	HAVANA	gene	71061294	71074110	-	-1.00112	5.3694	-7.51993	2.13895e-07	8.20586e-06	7.12146
ENSMUSG00000057182.17	protein_coding	Scn3a	2	OTTMUSG00000012887.1	chr2	HAVANA	gene	65288607	65397971	-	4.9346	-1.76618	8.15532	5.88442e-08	3.31015e-06	7.11898
ENSMUSG00000028936.16	protein_coding	Rpl22	2	OTTMUSG00000010577.1	chr4	HAVANA	gene	152410199	152418528	+	-1.15506	7.68102	-7.54113	2.047e-07	7.97533e-06	7.11629
ENSMUSG00000011257.20	protein_coding	Pabpc4	2	OTTMUSG00000008978.1	chr4	HAVANA	gene	123156144	123192718	+	-1.43635	6.85235	-7.53304	2.0816e-07	8.04751e-06	7.10885
ENSMUSG00000093405.3	lncRNA	Gm20684	2	OTTMUSG00000042240.1	chr7	HAVANA	gene	65508987	65512975	-	-1.87445	1.5332	-7.44697	2.48924e-07	9.11326e-06	7.08874
ENSMUSG00000017607.10	protein_coding	Tns4	2	OTTMUSG00000006443.1	chr11	HAVANA	gene	98956504	98980132	-	-2.10055	7.74311	-7.5268	2.10871e-07	8.13661e-06	7.08708
ENSMUSG00000034687.9	protein_coding	Fras1	2	OTTMUSG00000053289.1	chr5	HAVANA	gene	96521814	96932587	+	4.59402	-1.12928	8.1199	6.31435e-08	3.46442e-06	7.08404
ENSMUSG00000079057.5	protein_coding	Cyp4v3	2	OTTMUSG00000026456.1	chr8	HAVANA	gene	45757981	45786253	-	2.19026	1.71998	7.43584	2.54768e-07	9.24271e-06	7.08394
ENSMUSG00000046330.11	protein_coding	Rpl37a	2	OTTMUSG00000061689.1	chr1	HAVANA	gene	72750449	72752972	+	-1.11906	7.20528	-7.52309	2.12496e-07	8.16784e-06	7.08157
ENSMUSG00000020300.15	protein_coding	Cpeb4	2	OTTMUSG00000005363.1	chr11	HAVANA	gene	31822211	31885634	+	1.32584	5.44576	7.50192	2.22041e-07	8.45358e-06	7.079
ENSMUSG00000055003.15	protein_coding	Lrtm2	2	OTTMUSG00000023523.1	chr6	HAVANA	gene	119292094	119307727	-	4.04298	0.00723567	7.8223	1.14959e-07	5.36636e-06	7.06464
ENSMUSG00000064326.14	protein_coding	Siva1	2	OTTMUSG00000066010.1	chr12	HAVANA	gene	112611113	112615583	+	-1.38696	4.46854	-7.46122	2.41644e-07	8.97804e-06	7.06021
ENSMUSG00000021067.9	protein_coding	Sav1	2	OTTMUSG00000065771.1	chr12	HAVANA	gene	70011786	70033776	-	-0.7287	6.82601	-7.51078	2.17991e-07	8.34702e-06	7.05969
ENSMUSG00000032724.6	protein_coding	Abtb2	2	OTTMUSG00000014876.1	chr2	HAVANA	gene	103396655	103548768	+	2.42672	3.68182	7.43302	2.56269e-07	9.26983e-06	7.05178
ENSMUSG00000037949.9	protein_coding	Ano10	2	OTTMUSG00000062719.1	chr9	HAVANA	gene	122004940	122123489	-	0.924187	5.95802	7.4971	2.24272e-07	8.52233e-06	7.04474
ENSMUSG00000020100.16	protein_coding	Slc29a3	2	OTTMUSG00000030007.1	chr10	HAVANA	gene	60547851	60588573	-	1.05739	4.75435	7.46486	2.39818e-07	8.92677e-06	7.03062
ENSMUSG00000034892.9	protein_coding	Rps29	2	OTTMUSG00000023728.1	chr12	HAVANA	gene	69204496	69205960	-	-1.34553	6.9461	-7.49467	2.25406e-07	8.53304e-06	7.02648
ENSMUSG00000030079.16	protein_coding	Ruvbl1	2	OTTMUSG00000023968.1	chr6	HAVANA	gene	88442391	88474554	+	-1.56328	5.07749	-7.45743	2.43559e-07	9.01574e-06	7.02502
ENSMUSG00000030739.20	protein_coding	Myh14	2	OTTMUSG00000017593.1	chr7	HAVANA	gene	44255227	44320267	-	1.87188	8.0655	7.49609	2.24744e-07	8.52409e-06	7.02098
ENSMUSG00000052684.6	protein_coding	Jun	2	OTTMUSG00000008035.1	chr4	HAVANA	gene	94937271	94940459	-	2.18243	5.51129	7.46979	2.3737e-07	8.85211e-06	7.01804
ENSMUSG00000033751.6	protein_coding	Gadd45gip1	2	OTTMUSG00000029999.1	chr8	HAVANA	gene	85558151	85562111	+	-1.12297	4.5954	-7.44156	2.51743e-07	9.17919e-06	7.00439
ENSMUSG00000071415.7	protein_coding	Rpl23	2	OTTMUSG00000002776.1	chr11	HAVANA	gene	97668353	97673263	-	-1.15159	8.30834	-7.48806	2.28522e-07	8.63469e-06	7.00326
ENSMUSG00000104969.2	lncRNA	Gm43445	2	OTTMUSG00000054995.1	chr3	HAVANA	gene	143902933	143905023	-	2.62027	0.756683	7.50298	2.21552e-07	8.45358e-06	7.0018
ENSMUSG00000079641.4	protein_coding	Rpl39	2	OTTMUSG00000017100.1	chrX	HAVANA	gene	36346173	36349055	-	-1.25102	6.2258	-7.47253	2.36025e-07	8.83484e-06	6.99056
ENSMUSG00000028266.18	protein_coding	Lmo4	2	OTTMUSG00000029080.1	chr3	HAVANA	gene	143894291	143910981	-	1.17999	6.47633	7.47336	2.35615e-07	8.83484e-06	6.98864
ENSMUSG00000028669.16	protein_coding	Pithd1	2	OTTMUSG00000009845.1	chr4	HAVANA	gene	135702771	135714575	-	-1.01866	4.89352	-7.44497	2.4996e-07	9.13449e-06	6.98694
ENSMUSG00000057147.14	protein_coding	Dph6	2	OTTMUSG00000014824.1	chr2	HAVANA	gene	114346897	114485445	-	-0.838416	4.58848	-7.43177	2.56936e-07	9.26983e-06	6.98391
ENSMUSG00000028140.14	protein_coding	Mrpl9	1	OTTMUSG00000022464.1	chr3	HAVANA	gene	94350625	94358437	+	-0.877948	5.18525	-7.451	2.46843e-07	9.07025e-06	6.98379
ENSMUSG00000028322.12	protein_coding	Exosc3	2	OTTMUSG00000007603.1	chr4	HAVANA	gene	45316613	45342732	-	-1.25703	4.27282	-7.4163	2.65365e-07	9.47272e-06	6.98161
ENSMUSG00000000420.16	protein_coding	Galnt1	2	OTTMUSG00000036067.1	chr18	HAVANA	gene	24338401	24419875	+	-0.967639	8.35153	-7.47747	2.33611e-07	8.81035e-06	6.98084
ENSMUSG00000057113.14	protein_coding	Npm1	2	OTTMUSG00000005395.1	chr11	HAVANA	gene	33102287	33113206	-	-1.79699	9.26426	-7.47574	2.3445e-07	8.82538e-06	6.97802
ENSMUSG00000054640.17	protein_coding	Slc8a1	2	OTTMUSG00000072709.1	chr17	HAVANA	gene	81680534	82045806	-	2.6628	3.36221	7.37369	2.90087e-07	1.00856e-05	6.9713
ENSMUSG00000029672.17	protein_coding	Fam3c	1	OTTMUSG00000035360.1	chr6	HAVANA	gene	22306519	22356242	-	1.16595	7.68219	7.47033	2.37107e-07	8.85211e-06	6.96751
ENSMUSG00000028583.15	protein_coding	Pdpn	2	OTTMUSG00000010162.1	chr4	HAVANA	gene	142994001	143026134	-	6.06505	-3.06119	9.89031	2.2669e-09	3.66105e-07	6.96677
ENSMUSG00000031093.15	protein_coding	Dock11	2	OTTMUSG00000017193.1	chrX	HAVANA	gene	35152485	35340215	+	0.95416	6.04841	7.4577	2.43422e-07	9.01574e-06	6.96239
ENSMUSG00000027367.17	protein_coding	Stard7	2	OTTMUSG00000016010.1	chr2	HAVANA	gene	127112138	127140852	+	-1.02283	5.80265	-7.45344	2.45589e-07	9.05702e-06	6.96175
ENSMUSG00000019917.11	protein_coding	Septin10	2	OTTMUSG00000064563.1	chr10	HAVANA	gene	58977449	59057669	-	-0.865328	5.60565	-7.44915	2.47797e-07	9.0886e-06	6.96141
ENSMUSG00000022637.12	protein_coding	Cblb	2	OTTMUSG00000069657.1	chr16	HAVANA	gene	51851588	52028411	+	1.08888	5.21483	7.44088	2.521e-07	9.17919e-06	6.95949
ENSMUSG00000079139.5	processed_pseudogene	Gm4204	2	OTTMUSG00000049798.1	chr1	HAVANA	gene	135159733	135160963	+	-1.34251	3.06971	-7.37141	2.91476e-07	1.00988e-05	6.95912
ENSMUSG00000025810.10	protein_coding	Nrp1	2	OTTMUSG00000061647.1	chr8	HAVANA	gene	129085085	129229844	+	1.90143	6.08397	7.45258	2.46031e-07	9.05702e-06	6.94726
ENSMUSG00000042462.5	protein_coding	Dctpp1	2	OTTMUSG00000029401.1	chr7	HAVANA	gene	126856131	126859881	-	-2.17542	3.99684	-7.38109	2.85633e-07	1.00002e-05	6.93342
ENSMUSG00000019877.11	protein_coding	Serinc1	2	OTTMUSG00000035404.1	chr10	HAVANA	gene	57391870	57408626	-	0.787362	8.49016	7.45373	2.45443e-07	9.05702e-06	6.93064
ENSMUSG00000069893.11	protein_coding	9930111J21Rik1	2	OTTMUSG00000005529.1	chr11	HAVANA	gene	48836977	48870225	-	2.1491	2.32396	7.35353	3.02601e-07	1.04122e-05	6.9301
ENSMUSG00000019960.9	protein_coding	Dusp6	2	OTTMUSG00000065348.1	chr10	HAVANA	gene	99099093	99103351	+	-4.61993	5.44249	-7.37816	2.87386e-07	1.0009e-05	6.92507
ENSMUSG00000021403.4	protein_coding	Serpinb9b	2	OTTMUSG00000000699.1	chr13	HAVANA	gene	33211399	33225867	+	4.54914	5.60893	7.39127	2.79614e-07	9.8932e-06	6.92006
ENSMUSG00000022900.15	protein_coding	Ildr1	2	OTTMUSG00000014981.1	chr16	HAVANA	gene	36514340	36547166	+	1.35582	2.73175	7.34728	3.06596e-07	1.04776e-05	6.91144
ENSMUSG00000060938.15	protein_coding	Rpl26	2	OTTMUSG00000005949.1	chr11	HAVANA	gene	68792409	68797815	+	-1.26864	7.51223	-7.43825	2.5349e-07	9.21305e-06	6.9019
ENSMUSG00000123047.1	lncRNA	ENSMUSG00000123047	2	NA	chr3	HAVANA	gene	9118776	9122435	+	4.61427	-1.55569	8.35811	3.9422e-08	2.53443e-06	6.9019
ENSMUSG00000048087.7	protein_coding	Ahcyl	2	OTTMUSG00000066841.1	chr16	HAVANA	gene	45973348	45975440	-	-1.95537	4.3151	-7.3715	2.91424e-07	1.00988e-05	6.89761
ENSMUSG00000037196.7	protein_coding	Pacrg	2	OTTMUSG00000031249.1	chr17	HAVANA	gene	10621941	11059198	-	-5.24274	-0.225833	-8.01896	7.7271e-08	4.0193e-06	6.89678
ENSMUSG00000025403.6	protein_coding	Shmt2	2	OTTMUSG00000064772.1	chr10	HAVANA	gene	127352992	127358313	-	-2.00625	7.37767	-7.43103	2.57335e-07	9.26983e-06	6.89179
ENSMUSG00000022913.17	protein_coding	Psmg1	2	OTTMUSG00000020398.1	chr16	HAVANA	gene	95781133	95792160	-	-1.12275	4.35594	-7.37933	2.86686e-07	1.0002e-05	6.88815
ENSMUSG00000039202.13	protein_coding	Abhd2	2	OTTMUSG00000029104.1	chr7	HAVANA	gene	78922947	79015256	+	0.922856	9.69294	7.43097	2.57367e-07	9.26983e-06	6.88342
ENSMUSG00000021177.17	protein_coding	Tdp1	2	OTTMUSG00000033586.1	chr12	HAVANA	gene	99850776	99921478	+	-1.62654	4.66717	-7.37936	2.86666e-07	1.0002e-05	6.88126
ENSMUSG00000057278.9	protein_coding	Snrpg	2	OTTMUSG00000056436.1	chr6	HAVANA	gene	86348286	86356310	+	-1.63027	4.91385	-7.38458	2.83553e-07	9.96217e-06	6.8768
ENSMUSG00000028862.7	protein_coding	Map3k6	2	OTTMUSG00000010479.1	chr4	HAVANA	gene	132968129	132980240	+	-2.4577	3.3765	-7.32634	3.20365e-07	1.07553e-05	6.87441
ENSMUSG00000037316.10	protein_coding	Bag4	2	OTTMUSG00000060659.1	chr8	HAVANA	gene	26254566	26275315	-	-0.893357	4.7444	-7.38473	2.83465e-07	9.96217e-06	6.87244
ENSMUSG00000045817.9	protein_coding	Zfp36l2	2	OTTMUSG00000020082.1	chr17	HAVANA	gene	84491359	84495375	-	-1.59809	7.41849	-7.42154	2.62482e-07	9.42018e-06	6.86887
ENSMUSG00000093674.8	protein_coding	Rpl41	2	OTTMUSG00000042126.1	chr10	HAVANA	gene	128383983	128385174	-	-1.28759	8.83718	-7.42258	2.61908e-07	9.41647e-06	6.86552
ENSMUSG00000040462.14	protein_coding	Os9	2	OTTMUSG00000064602.1	chr10	HAVANA	gene	126931519	126957000	-	1.08239	7.6925	7.42021	2.63209e-07	9.42937e-06	6.86245
ENSMUSG00000021144.15	protein_coding	Mta1	2	OTTMUSG00000017198.1	chr12	HAVANA	gene	113061898	113100826	+	-0.664843	6.94654	-7.41691	2.65028e-07	9.47272e-06	6.86027
ENSMUSG00000054517.10	protein_coding	Trim65	2	OTTMUSG00000003756.1	chr11	HAVANA	gene	116012672	116021954	-	-0.954908	4.2465	-7.35974	2.98689e-07	1.02952e-05	6.85986
ENSMUSG00000029298.16	protein_coding	Gbp9	2	OTTMUSG00000053800.1	chr5	HAVANA	gene	105225496	105287405	-	2.48614	2.24219	7.31761	3.26296e-07	1.08365e-05	6.85794
ENSMUSG00000102418.2	protein_coding	Sh2d1b1	2	OTTMUSG00000049940.1	chr1	HAVANA	gene	170104889	170114338	+	-2.43755	1.62424	-7.32809	3.1919e-07	1.07553e-05	6.85234
ENSMUSG00000059751.8	transcribed_processed_pseudogene	Rps3a3	2	OTTMUSG00000046074.1	chr13	HAVANA	gene	108807137	108807931	+	-1.28245	6.79	-7.40941	2.6921e-07	9.59289e-06	6.8486
ENSMUSG00000043019.13	protein_coding	Edem3	2	OTTMUSG00000049645.1	chr1	HAVANA	gene	151631122	151697802	+	0.852073	6.66416	7.40757	2.70248e-07	9.59647e-06	6.84646
ENSMUSG00000068396.10	processed_pseudogene	Rpl34-ps1	2	OTTMUSG00000023375.1	chr6	HAVANA	gene	71101594	71101947	+	-1.30888	4.02931	-7.34222	3.09863e-07	1.05712e-05	6.84011
ENSMUSG00000126591.1	lncRNA	ENSMUSG00000126591	2	NA	chr2	HAVANA	gene	75443407	75446499	+	-3.68827	-0.142078	-7.66273	1.59289e-07	6.78707e-06	6.83634
ENSMUSG00000030056.9	protein_coding	Isy1	2	OTTMUSG00000057272.1	chr6	HAVANA	gene	87791251	87815780	-	-1.16444	4.38349	-7.34995	3.04883e-07	1.04369e-05	6.83508
ENSMUSG00000060679.15	protein_coding	Mrps9	2	OTTMUSG00000046302.1	chr1	HAVANA	gene	42890393	42944843	+	-0.693116	5.45428	-7.38578	2.8284e-07	9.96217e-06	6.83371
ENSMUSG00000030084.13	protein_coding	Plxna1	2	OTTMUSG00000057675.1	chr6	HAVANA	gene	89293296	89339602	-	0.838005	8.59197	7.40753	2.70269e-07	9.59647e-06	6.83343
ENSMUSG00000028048.12	protein_coding	Gba1	2	OTTMUSG00000052631.1	chr3	HAVANA	gene	89110235	89116273	+	1.15604	5.7551	7.38864	2.81155e-07	9.93017e-06	6.82578
ENSMUSG00000072214.9	protein_coding	Septin5	2	OTTMUSG00000071424.1	chr16	HAVANA	gene	18439252	18448704	-	1.6169	1.59472	7.30445	3.35446e-07	1.10418e-05	6.81648
ENSMUSG00000040658.8	protein_coding	Dnph1	2	OTTMUSG00000072177.1	chr17	HAVANA	gene	46807637	46810550	+	-2.22984	4.50938	-7.33295	3.15954e-07	1.07153e-05	6.81427
ENSMUSG00000034570.13	protein_coding	Inpp5j	2	OTTMUSG00000005023.1	chr11	HAVANA	gene	3444375	3454821	-	1.97425	2.49504	7.29116	3.44957e-07	1.12878e-05	6.80378
ENSMUSG00000078247.8	lncRNA	Airn	2	OTTMUSG00000034914.1	chr17	HAVANA	gene	12960198	13079299	+	1.52628	4.30651	7.3259	3.20664e-07	1.07553e-05	6.78589
ENSMUSG00000032531.16	protein_coding	Amotl2	2	OTTMUSG00000033309.1	chr9	HAVANA	gene	102593871	102610617	+	1.90104	7.80487	7.38162	2.85316e-07	1.00002e-05	6.78201
ENSMUSG00000100755.2	processed_pseudogene	Rps23-ps1	2	OTTMUSG00000022083.1	chr3	HAVANA	gene	37768889	37769313	+	-1.43605	2.86195	-7.27184	3.59279e-07	1.1586e-05	6.76491
ENSMUSG00000051379.13	protein_coding	Flrt3	2	OTTMUSG00000015600.1	chr2	HAVANA	gene	140492834	140513389	-	1.3139	5.6966	7.35156	3.03852e-07	1.04329e-05	6.76491
ENSMUSG00000057421.13	protein_coding	Las1l	2	OTTMUSG00000018162.1	chrX	HAVANA	gene	94978941	95000568	-	-0.944106	6.11174	-7.36348	2.9636e-07	1.02326e-05	6.7629
ENSMUSG00000071708.12	protein_coding	Sms	2	OTTMUSG00000019398.1	chrX	HAVANA	gene	156226851	156275283	-	-1.09338	4.8313	-7.33254	3.16226e-07	1.07153e-05	6.75968
ENSMUSG00000005718.9	protein_coding	Tfap4	2	OTTMUSG00000070990.1	chr16	HAVANA	gene	4362525	4377718	-	-2.22003	3.76499	-7.28313	3.50834e-07	1.13954e-05	6.75714
ENSMUSG00000020315.19	protein_coding	Sptbn1	2	OTTMUSG00000005341.1	chr11	HAVANA	gene	30049395	30218175	-	0.744359	9.67522	7.36549	2.95113e-07	1.02071e-05	6.7458
ENSMUSG00000049624.15	protein_coding	Slc17a5	2	OTTMUSG00000030755.1	chr9	HAVANA	gene	78443770	78495323	-	1.14741	4.73514	7.31972	3.24849e-07	1.08067e-05	6.72941
ENSMUSG00000028763.19	protein_coding	Hspg2	2	OTTMUSG00000009935.1	chr4	HAVANA	gene	137196080	137297941	+	1.35333	9.55332	7.35095	3.04244e-07	1.04329e-05	6.71529
ENSMUSG00000005667.9	protein_coding	Mthfd2	2	OTTMUSG00000023127.1	chr6	HAVANA	gene	83282673	83302890	-	-2.29647	6.2407	-7.329	3.18584e-07	1.07553e-05	6.70952
ENSMUSG00000033075.18	protein_coding	Senp1	2	OTTMUSG00000042971.1	chr15	HAVANA	gene	97936625	97991625	-	-1.08446	6.30955	-7.33745	3.12984e-07	1.06596e-05	6.70813
ENSMUSG00000020018.7	protein_coding	Snrpf	2	OTTMUSG00000030971.1	chr10	HAVANA	gene	93418891	93425568	-	-1.82933	4.5702	-7.28701	3.47984e-07	1.13497e-05	6.703
ENSMUSG00000014859.10	protein_coding	E2f4	2	OTTMUSG00000062044.1	chr8	HAVANA	gene	106024295	106032002	+	-1.1133	6.24766	-7.3347	3.14795e-07	1.0703e-05	6.70196
ENSMUSG00000027297.16	protein_coding	Ltk	2	OTTMUSG00000016528.1	chr2	HAVANA	gene	119581801	119590912	-	1.7072	2.57276	7.24712	3.78505e-07	1.20127e-05	6.70162
ENSMUSG00000031432.4	protein_coding	Prps1	2	OTTMUSG00000018847.1	chrX	HAVANA	gene	139357362	139376889	+	-1.25213	4.91394	-7.30345	3.36152e-07	1.10418e-05	6.69902
ENSMUSG00000020121.16	protein_coding	Srgap1	2	OTTMUSG00000032486.1	chr10	HAVANA	gene	121616896	121883220	-	2.31171	4.75762	7.28025	3.52974e-07	1.14195e-05	6.69259
ENSMUSG00000020248.19	protein_coding	Nfyb	2	OTTMUSG00000032747.1	chr10	HAVANA	gene	82584535	82599978	-	-0.88136	5.23842	-7.30867	3.32484e-07	1.09692e-05	6.69098
ENSMUSG00000000915.16	protein_coding	Hip1r	2	OTTMUSG00000035912.1	chr5	HAVANA	gene	124111691	124143621	+	0.993641	6.06213	7.32515	3.21166e-07	1.07553e-05	6.68497
ENSMUSG00000053560.6	protein_coding	Ier2	2	OTTMUSG00000074690.1	chr8	HAVANA	gene	85387960	85389483	-	-1.17267	5.05848	-7.29895	3.39348e-07	1.11224e-05	6.67666
ENSMUSG00000028677.20	protein_coding	Rnf220	2	OTTMUSG00000008570.1	chr4	HAVANA	gene	117128660	117354249	-	-0.75761	6.219	-7.3236	3.22213e-07	1.07724e-05	6.67603
ENSMUSG00000033170.15	protein_coding	Card10	2	OTTMUSG00000035247.1	chr15	HAVANA	gene	78659338	78687242	-	1.13441	6.42866	7.32558	3.20877e-07	1.07553e-05	6.67411
ENSMUSG00000038658.16	protein_coding	Ric1	2	OTTMUSG00000034266.1	chr19	HAVANA	gene	29499682	29584229	+	1.26875	6.17155	7.32097	3.24001e-07	1.08067e-05	6.67347
ENSMUSG00000025997.14	protein_coding	Ikzf2	1	OTTMUSG00000047132.1	chr1	HAVANA	gene	69570373	69726404	-	1.57321	3.16113	7.24666	3.7887e-07	1.20127e-05	6.66082
ENSMUSG00000022544.15	protein_coding	Eef2kmt	2	OTTMUSG00000028227.1	chr16	HAVANA	gene	5062016	5073847	-	-1.09467	4.07894	-7.26252	3.66408e-07	1.1778e-05	6.65984
ENSMUSG00000050271.13	protein_coding	Prag1	2	OTTMUSG00000022666.1	chr8	HAVANA	gene	36561982	36614941	+	1.36146	5.75889	7.30319	3.36338e-07	1.10418e-05	6.65429
ENSMUSG00000045136.7	protein_coding	Tubb2b	2	OTTMUSG00000067474.1	chr13	HAVANA	gene	34310731	34314449	-	1.85716	6.20344	7.3113	3.30651e-07	1.09316e-05	6.65338
ENSMUSG00000022946.11	protein_coding	Dop1b	2	OTTMUSG00000069445.1	chr16	HAVANA	gene	93508792	93607478	+	1.98198	6.77146	7.31124	3.30691e-07	1.09316e-05	6.64655
ENSMUSG00000005142.11	protein_coding	Man2b1	2	OTTMUSG00000061404.1	chr8	HAVANA	gene	85809899	85824911	+	0.922343	6.81043	7.31109	3.30799e-07	1.09316e-05	6.63985
ENSMUSG00000031485.16	protein_coding	Plpbp	2	OTTMUSG00000060984.1	chr8	HAVANA	gene	27532583	27546160	+	-0.821381	5.57674	-7.28821	3.47105e-07	1.13395e-05	6.62647
ENSMUSG00000134059.1	lncRNA	ENSMUSG00000134059	2	NA	chr11	HAVANA	gene	99472656	99522193	+	2.28424	0.89015	7.24636	3.7911e-07	1.20127e-05	6.62493
ENSMUSG00000040105.4	protein_coding	Plpp6	2	OTTMUSG00000033894.1	chr19	HAVANA	gene	28941353	28944211	+	0.886128	5.2051	7.28278	3.51093e-07	1.13954e-05	6.61977
ENSMUSG00000026205.9	protein_coding	Slc23a3	2	OTTMUSG00000048447.1	chr1	HAVANA	gene	75102185	75110534	-	1.59154	2.61018	7.19555	4.221e-07	1.32091e-05	6.6016
ENSMUSG00000071041.5	processed_pseudogene	Impdh2-ps	2	OTTMUSG00000019498.1	chr8	HAVANA	gene	100757190	100758734	+	-2.56474	0.384333	-7.33004	3.17886e-07	1.07534e-05	6.60074
ENSMUSG00000041361.15	protein_coding	Myzap	2	OTTMUSG00000036492.1	chr9	HAVANA	gene	71411629	71499642	-	0.942764	5.2967	7.27219	3.59014e-07	1.1586e-05	6.60052
ENSMUSG00000029695.14	protein_coding	Aass	2	OTTMUSG00000023540.1	chr6	HAVANA	gene	23072172	23132985	-	2.61789	-0.298172	7.31971	3.24861e-07	1.08067e-05	6.59111
ENSMUSG00000118668.1	protein_coding	Rps6ka4	2	NA	chr19	HAVANA	gene	6806578	6818004	-	-1.27625	6.42245	-7.28109	3.52345e-07	1.14176e-05	6.58505
ENSMUSG00000033209.18	protein_coding	Ttc28	2	OTTMUSG00000028650.1	chr5	HAVANA	gene	111027669	111437646	+	1.50119	2.67196	7.17971	4.36501e-07	1.35315e-05	6.57571
ENSMUSG00000039031.17	protein_coding	Arhgap18	2	OTTMUSG00000024292.1	chr10	HAVANA	gene	26629417	26794644	+	-1.48909	5.88733	-7.26681	3.63108e-07	1.16907e-05	6.57414
ENSMUSG00000044162.13	protein_coding	Tnip3	2	OTTMUSG00000016677.1	chr6	HAVANA	gene	65502297	65611024	+	3.64867	1.15057	7.28304	3.50906e-07	1.13954e-05	6.56818
ENSMUSG00000039474.14	protein_coding	Wfs1	1	OTTMUSG00000035647.1	chr5	HAVANA	gene	37123448	37146549	-	1.46029	5.59195	7.25492	3.72324e-07	1.18918e-05	6.55876
ENSMUSG00000035351.17	protein_coding	Nup37	2	OTTMUSG00000063967.1	chr10	HAVANA	gene	87982854	88014252	+	-1.92722	4.19877	-7.20946	4.09854e-07	1.2885e-05	6.55788
ENSMUSG00000029098.18	protein_coding	Acox3	1	OTTMUSG00000023571.1	chr5	HAVANA	gene	35740384	35772696	+	1.31439	4.95426	7.23293	3.90017e-07	1.23388e-05	6.54114
ENSMUSG00000023942.16	protein_coding	Slc29a1	2	OTTMUSG00000036637.1	chr17	HAVANA	gene	45896126	45910532	-	-2.38045	7.20332	-7.25653	3.71061e-07	1.18839e-05	6.52892
ENSMUSG00000035929.12	protein_coding	H2-Q4	2	OTTMUSG00000037138.1	chr17	HAVANA	gene	35598593	35604266	+	1.56895	3.94044	7.19678	4.20996e-07	1.32091e-05	6.52142
ENSMUSG00000000594.8	protein_coding	Gm2a	2	OTTMUSG00000005683.1	chr11	HAVANA	gene	54988941	55003855	+	1.11034	6.1872	7.24913	3.76906e-07	1.20127e-05	6.51543
ENSMUSG00000020422.15	protein_coding	Tns3	2	OTTMUSG00000005142.1	chr11	HAVANA	gene	8381652	8614681	-	1.05569	8.25903	7.25685	3.70814e-07	1.18839e-05	6.51517
ENSMUSG00000038777.20	protein_coding	Sema6c	2	OTTMUSG00000022286.1	chr3	HAVANA	gene	95067768	95081335	+	2.3012	2.01056	7.14529	4.69568e-07	1.42048e-05	6.50725
ENSMUSG00000020122.17	protein_coding	Egfr	2	OTTMUSG00000005185.1	chr11	HAVANA	gene	16702203	16868158	+	1.32523	7.38669	7.24651	3.78996e-07	1.20127e-05	6.4972
ENSMUSG00000027463.15	protein_coding	Slc52a3	2	OTTMUSG00000015850.1	chr2	HAVANA	gene	151838431	151851178	+	1.53401	3.34892	7.15069	4.64213e-07	1.40721e-05	6.46232
ENSMUSG00000026278.15	protein_coding	Bok	2	OTTMUSG00000048660.1	chr1	HAVANA	gene	93613382	93623486	+	-1.51472	4.67604	-7.17979	4.36432e-07	1.35315e-05	6.46125
ENSMUSG00000038831.17	protein_coding	Ralgps1	2	OTTMUSG00000012576.1	chr2	HAVANA	gene	33023429	33261498	-	1.29413	3.82352	7.15578	4.59225e-07	1.39976e-05	6.45446
ENSMUSG00000056383.11	protein_coding	AI987944	2	OTTMUSG00000035890.1	chr7	HAVANA	gene	41022347	41042803	-	0.75473	4.36699	7.17379	4.42017e-07	1.36602e-05	6.45249
ENSMUSG00000028040.8	protein_coding	Efna4	2	OTTMUSG00000022077.1	chr3	HAVANA	gene	89240697	89245335	-	1.36581	4.07327	7.16729	4.48145e-07	1.37858e-05	6.44711
ENSMUSG00000073664.12	protein_coding	Nbeal1	2	OTTMUSG00000034193.1	chr1	HAVANA	gene	60219758	60377487	+	1.03626	6.72011	7.2178	4.02687e-07	1.26796e-05	6.44253
ENSMUSG00000057666.19	protein_coding	Gapdh	2	OTTMUSG00000027118.1	chr6	HAVANA	gene	125138678	125143430	-	-1.03797	10.5324	-7.21993	4.0088e-07	1.26425e-05	6.44036
ENSMUSG00000050628.7	protein_coding	Ubald2	2	OTTMUSG00000003905.1	chr11	HAVANA	gene	116324920	116329903	+	-1.39223	4.05732	-7.15047	4.64434e-07	1.40721e-05	6.4316
ENSMUSG00000072945.4	protein_coding	Ripply1	2	OTTMUSG00000018733.1	chrX	HAVANA	gene	138680298	138683102	-	-2.35799	1.45171	-7.11451	5.01329e-07	1.50069e-05	6.43131
ENSMUSG00000073557.13	protein_coding	Ppp1r12b	1	OTTMUSG00000021600.1	chr1	HAVANA	gene	134682396	134883680	-	1.87985	4.96852	7.16384	4.51443e-07	1.38659e-05	6.41086
ENSMUSG00000039842.16	protein_coding	Mcph1	1	OTTMUSG00000020492.1	chr8	HAVANA	gene	18645147	18853205	+	-1.27729	4.81296	-7.15941	4.55709e-07	1.39329e-05	6.40024
ENSMUSG00000000605.10	protein_coding	Clcn4	2	OTTMUSG00000037804.1	chr7	HAVANA	gene	7285308	7303850	-	0.95041	5.77081	7.18563	4.31062e-07	1.34044e-05	6.39423
ENSMUSG00000118559.3	protein_coding	A930007A09Rik	2	OTTMUSG00000074878.1	chr16	HAVANA	gene	13572430	13576401	+	1.28582	2.03307	7.09011	5.28065e-07	1.55974e-05	6.39165
ENSMUSG00000022967.14	protein_coding	Ifnar1	2	OTTMUSG00000027185.1	chr16	HAVANA	gene	91282126	91304329	+	0.733933	6.70607	7.19484	4.22738e-07	1.32091e-05	6.39131
ENSMUSG00000097290.11	lncRNA	1300002E11Rik	2	OTTMUSG00000060326.1	chr16	HAVANA	gene	21613068	21627790	+	1.01753	3.62641	7.12096	4.94492e-07	1.48689e-05	6.38841
ENSMUSG00000066571.14	protein_coding	Garre1	2	OTTMUSG00000008390.1	chr7	HAVANA	gene	33936132	34012976	-	0.96068	6.12138	7.18582	4.30887e-07	1.34044e-05	6.38758
ENSMUSG00000023915.6	protein_coding	Tnfrsf21	2	OTTMUSG00000072109.1	chr17	HAVANA	gene	43327446	43400080	+	1.59444	8.40775	7.18626	4.30487e-07	1.34044e-05	6.36489
ENSMUSG00000036611.6	protein_coding	Eepd1	2	OTTMUSG00000027404.1	chr9	HAVANA	gene	25392843	25515406	+	-1.26264	3.52655	-7.10065	5.16345e-07	1.53248e-05	6.36413
ENSMUSG00000024743.17	protein_coding	Syt7	2	OTTMUSG00000068314.1	chr19	HAVANA	gene	10366454	10430544	+	-2.10998	4.95315	-7.13142	4.83617e-07	1.45638e-05	6.35962
ENSMUSG00000063268.13	protein_coding	Parp10	2	OTTMUSG00000035244.1	chr15	HAVANA	gene	76115374	76127641	-	1.32849	3.72145	7.10658	5.09863e-07	1.52036e-05	6.35408
ENSMUSG00000031984.9	protein_coding	2810004N23Rik	2	OTTMUSG00000061568.1	chr8	HAVANA	gene	125563684	125589859	-	-1.0629	5.48507	-7.15714	4.5791e-07	1.39788e-05	6.35348
ENSMUSG00000070003.8	protein_coding	Ssbp4	2	OTTMUSG00000061447.1	chr8	HAVANA	gene	71050140	71061522	-	-0.939556	6.19582	-7.16768	4.47776e-07	1.37858e-05	6.34452
ENSMUSG00000036565.8	protein_coding	Ttyh3	2	OTTMUSG00000054833.1	chr5	HAVANA	gene	140606333	140634786	-	1.41887	6.79955	7.17167	4.44005e-07	1.37005e-05	6.34277
ENSMUSG00000022822.18	protein_coding	Abcc5	2	OTTMUSG00000025954.1	chr16	HAVANA	gene	20150053	20245144	-	1.12009	7.89496	7.17509	4.40795e-07	1.36435e-05	6.34221
ENSMUSG00000038534.21	protein_coding	Osbpl7	2	OTTMUSG00000002232.1	chr11	HAVANA	gene	96941454	96959730	+	0.923272	4.51847	7.11887	4.96694e-07	1.49127e-05	6.32285
ENSMUSG00000028964.15	protein_coding	Park7	2	OTTMUSG00000010158.1	chr4	HAVANA	gene	150981590	150998894	-	-1.05797	6.73302	-7.16098	4.54187e-07	1.39289e-05	6.32243
ENSMUSG00000120990.2	lncRNA	Gm52698	2	NA	chr4	HAVANA	gene	43359900	43399837	-	3.09617	0.215534	7.25599	3.71484e-07	1.18839e-05	6.32239
ENSMUSG00000039501.15	protein_coding	Znfx1	2	OTTMUSG00000001138.1	chr2	HAVANA	gene	166877713	166904935	-	0.884947	5.27552	7.13641	4.78516e-07	1.44536e-05	6.3111
ENSMUSG00000030607.8	protein_coding	Acan	2	OTTMUSG00000058542.1	chr7	HAVANA	gene	78703231	78764847	+	-3.55461	2.50554	-7.04807	5.77639e-07	1.66694e-05	6.30736
ENSMUSG00000019689.5	protein_coding	Fmc1	2	OTTMUSG00000024224.1	chr6	HAVANA	gene	38510437	38516384	+	-1.39088	2.67456	-7.04926	5.76168e-07	1.66694e-05	6.29956
ENSMUSG00000028680.15	protein_coding	Plk3	2	OTTMUSG00000009922.1	chr4	HAVANA	gene	116985852	116991160	-	-2.31722	3.0171	-7.0465	5.7958e-07	1.66694e-05	6.2983
ENSMUSG00000054889.11	protein_coding	Dsp	2	OTTMUSG00000032599.1	chr13	HAVANA	gene	38335270	38382553	+	1.12422	9.27789	7.15416	4.60814e-07	1.40247e-05	6.29601
ENSMUSG00000015094.17	protein_coding	Npdc1	2	OTTMUSG00000012107.1	chr2	HAVANA	gene	25289363	25299506	+	0.85732	7.00611	7.15043	4.64478e-07	1.40721e-05	6.29418
ENSMUSG00000112627.4	lncRNA	4933412E12Rik	2	OTTMUSG00000064251.1	chr10	HAVANA	gene	116785662	116805010	+	1.33738	2.57045	7.03865	5.8939e-07	1.68616e-05	6.27997
ENSMUSG00000102550.2	processed_pseudogene	Gm8276	2	OTTMUSG00000052013.1	chr3	HAVANA	gene	59338958	59340769	+	-1.39046	1.54051	-7.04282	5.84157e-07	1.67598e-05	6.27915
ENSMUSG00000097960.3	lncRNA	A330074K22Rik	2	OTTMUSG00000043041.1	chr8	HAVANA	gene	120931173	120955074	-	4.19138	-0.574638	7.40661	2.70792e-07	9.598e-06	6.26831
ENSMUSG00000002825.9	protein_coding	Qtrt1	2	OTTMUSG00000063356.1	chr9	HAVANA	gene	21323133	21331570	+	-1.31389	4.23299	-7.07836	5.41464e-07	1.59425e-05	6.26828
ENSMUSG00000031783.11	protein_coding	Polr2c	2	OTTMUSG00000061706.1	chr8	HAVANA	gene	95584078	95600163	+	-1.04352	5.23349	-7.10559	5.10938e-07	1.52036e-05	6.25658
ENSMUSG00000028028.12	protein_coding	Alpk1	1	OTTMUSG00000031352.1	chr3	HAVANA	gene	127463959	127574176	-	1.25091	5.56931	7.10926	5.06965e-07	1.51529e-05	6.2472
ENSMUSG00000054321.8	protein_coding	Taf4b	2	OTTMUSG00000068678.1	chr18	HAVANA	gene	14916302	15033416	+	-1.99037	3.55242	-7.03692	5.91575e-07	1.68759e-05	6.24658
ENSMUSG00000019792.9	protein_coding	Trmt11	2	OTTMUSG00000063787.1	chr10	HAVANA	gene	30410221	30476745	-	-1.13878	3.23084	-7.03459	5.94521e-07	1.69358e-05	6.24367
ENSMUSG00000036983.8	protein_coding	Tfb1m	2	OTTMUSG00000071876.1	chr17	HAVANA	gene	3569531	3608056	-	-1.34337	2.67863	-7.02043	6.12812e-07	1.73336e-05	6.24246
ENSMUSG00000010048.11	protein_coding	Ifrd2	2	OTTMUSG00000050667.1	chr9	HAVANA	gene	107464841	107470584	+	-1.75022	5.50643	-7.09529	5.22271e-07	1.5449e-05	6.23695
ENSMUSG00000047767.18	protein_coding	Atg16l2	2	OTTMUSG00000031256.1	chr7	HAVANA	gene	100912241	100951458	-	1.21022	3.69563	7.04602	5.80173e-07	1.66694e-05	6.23616
ENSMUSG00000025464.16	protein_coding	Paox	2	OTTMUSG00000027287.1	chr7	HAVANA	gene	139695712	139717137	+	-1.09191	4.45223	-7.0754	5.44896e-07	1.59533e-05	6.22744
ENSMUSG00000004929.13	protein_coding	Thop1	2	OTTMUSG00000035441.1	chr10	HAVANA	gene	80905869	80918393	+	-1.01864	6.0535	-7.10608	5.10404e-07	1.52036e-05	6.22165
ENSMUSG00000022175.10	protein_coding	Lrp10	2	OTTMUSG00000069485.1	chr14	HAVANA	gene	54701594	54708954	+	1.02378	7.70305	7.1168	4.98897e-07	1.49564e-05	6.21761
ENSMUSG00000027130.16	protein_coding	Slc12a6	2	OTTMUSG00000015141.1	chr2	HAVANA	gene	112096170	112193508	+	1.1271	5.82619	7.10047	5.1654e-07	1.53248e-05	6.21089
ENSMUSG00000034282.4	protein_coding	Evpl	2	OTTMUSG00000003838.1	chr11	HAVANA	gene	116111385	116128903	-	1.25521	6.17456	7.09705	5.20321e-07	1.54141e-05	6.19128
ENSMUSG00000022469.18	protein_coding	Rapgef3	2	OTTMUSG00000032758.1	chr15	HAVANA	gene	97642651	97665853	-	-1.85474	5.40053	-7.0712	5.49796e-07	1.60733e-05	6.18887
ENSMUSG00000036053.19	protein_coding	Fmnl2	2	OTTMUSG00000012431.1	chr2	HAVANA	gene	52747872	53023816	+	-1.2033	5.3267	-7.06336	5.59077e-07	1.62577e-05	6.17754
ENSMUSG00000023104.10	protein_coding	Rfc2	2	OTTMUSG00000055749.1	chr5	HAVANA	gene	134610220	134630659	+	-1.23796	5.71335	-7.07772	5.42203e-07	1.59425e-05	6.17536
ENSMUSG00000036667.15	protein_coding	Tcaf1	2	OTTMUSG00000027060.1	chr6	HAVANA	gene	42644936	42687022	-	0.866386	5.79241	7.08105	5.3837e-07	1.58783e-05	6.17046
ENSMUSG00000024621.17	protein_coding	Csf1r	2	OTTMUSG00000014918.1	chr18	HAVANA	gene	61233670	61265221	+	4.94865	1.51564	7.00208	6.3738e-07	1.79334e-05	6.1553
ENSMUSG00000055917.16	protein_coding	Zfp277	2	OTTMUSG00000066584.1	chr12	HAVANA	gene	40365045	40495901	-	-0.716035	5.13635	-7.05961	5.63567e-07	1.63328e-05	6.15502
ENSMUSG00000024036.17	protein_coding	Slc37a1	2	OTTMUSG00000073314.1	chr17	HAVANA	gene	31505766	31569713	+	1.76528	3.99917	7.02053	6.12687e-07	1.73336e-05	6.15477
ENSMUSG00000015672.5	protein_coding	Mrpl32	2	OTTMUSG00000066957.1	chr13	HAVANA	gene	14782769	14787750	-	-0.829616	4.74229	-7.03777	5.905e-07	1.68693e-05	6.13618
ENSMUSG00000022747.18	protein_coding	St3gal6	1	OTTMUSG00000025631.1	chr16	HAVANA	gene	58288488	58344606	-	-0.850963	7.35538	-7.07578	5.4445e-07	1.59533e-05	6.13164
ENSMUSG00000030057.16	protein_coding	Cnbp	2	OTTMUSG00000023465.1	chr6	HAVANA	gene	87819597	87828088	-	-1.05639	8.4046	-7.07709	5.42934e-07	1.59425e-05	6.13078
ENSMUSG00000052656.14	protein_coding	Rnf103	1	OTTMUSG00000023991.1	chr6	HAVANA	gene	71470878	71487865	+	1.53585	6.36699	7.06758	5.54067e-07	1.61745e-05	6.12905
ENSMUSG00000046879.8	protein_coding	Irgm1	2	OTTMUSG00000005518.1	chr11	HAVANA	gene	48752795	48762510	-	1.21617	4.07954	7.00192	6.37601e-07	1.79334e-05	6.11111
ENSMUSG00000058799.17	protein_coding	Nap1l1	2	OTTMUSG00000064089.1	chr10	HAVANA	gene	111309084	111334011	+	-1.19879	8.24872	-7.06398	5.58341e-07	1.62577e-05	6.10299
ENSMUSG00000064210.8	protein_coding	Ano6	2	OTTMUSG00000069748.1	chr15	HAVANA	gene	95688724	95872632	+	0.711638	7.91763	7.06313	5.5935e-07	1.62577e-05	6.10139
ENSMUSG00000004897.18	protein_coding	Hdgf	2	OTTMUSG00000027208.1	chr3	HAVANA	gene	87813628	87823439	+	-0.857935	8.90876	-7.06234	5.60292e-07	1.62615e-05	6.09843
ENSMUSG00000006651.9	protein_coding	Aplp1	2	OTTMUSG00000059360.1	chr7	HAVANA	gene	30134407	30144960	-	2.87718	0.394939	7.02938	6.01187e-07	1.71014e-05	6.09475
ENSMUSG00000026209.16	protein_coding	Dnpep	2	OTTMUSG00000048821.1	chr1	HAVANA	gene	75284540	75294634	-	1.01867	5.98716	7.0478	5.77973e-07	1.66694e-05	6.09253
ENSMUSG00000046865.8	protein_coding	Fbl	2	OTTMUSG00000058942.1	chr7	HAVANA	gene	27869135	27878694	+	-1.87032	5.34471	-7.02178	6.11043e-07	1.73325e-05	6.08862
ENSMUSG00000034292.14	protein_coding	Traf3ip1	1	OTTMUSG00000048497.1	chr1	HAVANA	gene	91422369	91457029	+	-0.751129	4.64514	-7.00096	6.38911e-07	1.79451e-05	6.06745
ENSMUSG00000083716.5	processed_pseudogene	Gm13436	2	OTTMUSG00000012219.1	chr2	HAVANA	gene	36697838	36698404	-	-1.20619	3.60661	-6.96024	6.97253e-07	1.92596e-05	6.05644
ENSMUSG00000020609.15	protein_coding	Apob	2	OTTMUSG00000035465.1	chr12	HAVANA	gene	8027648	8066835	+	2.12299	4.95125	6.9968	6.44628e-07	1.8055e-05	6.05562
ENSMUSG00000024608.12	protein_coding	Rps14	2	OTTMUSG00000031382.1	chr18	HAVANA	gene	60880170	60911618	+	-1.21925	8.19947	-7.03965	5.88128e-07	1.68496e-05	6.05024
ENSMUSG00000002227.16	protein_coding	Mov10	2	OTTMUSG00000022217.1	chr3	HAVANA	gene	104702152	104725879	-	1.16134	5.39488	7.01584	6.18864e-07	1.74801e-05	6.04477
ENSMUSG00000107383.2	processed_pseudogene	Gm4366	2	OTTMUSG00000056187.1	chr7	HAVANA	gene	116423745	116425086	-	-1.4017	2.06181	-6.91666	7.65784e-07	2.0665e-05	6.03606
ENSMUSG00000030505.18	protein_coding	Prmt3	2	OTTMUSG00000020564.1	chr7	HAVANA	gene	49428094	49508013	+	-1.44376	5.12532	-6.98885	6.55721e-07	1.82723e-05	6.02243
ENSMUSG00000076431.5	protein_coding	Sox4	2	OTTMUSG00000000729.1	chr13	HAVANA	gene	29132902	29137696	-	1.51009	8.21526	7.02312	6.09293e-07	1.73074e-05	6.01511
ENSMUSG00000029911.15	protein_coding	Ssbp1	2	OTTMUSG00000026906.1	chr6	HAVANA	gene	40448286	40461634	+	-0.726326	5.27149	-6.98965	6.54592e-07	1.82723e-05	6.0029
ENSMUSG00000025436.13	protein_coding	Atp23	2	OTTMUSG00000064594.1	chr10	HAVANA	gene	126704296	126737224	-	-1.46383	2.62211	-6.90358	7.87691e-07	2.10044e-05	6.00177
ENSMUSG00000040560.11	protein_coding	Wdr7	2	OTTMUSG00000073538.1	chr18	HAVANA	gene	63841756	64122847	+	1.16028	4.75505	6.96737	6.86659e-07	1.89931e-05	5.9862
ENSMUSG00000032363.16	protein_coding	Adamts7	2	OTTMUSG00000025854.1	chr9	HAVANA	gene	90045122	90090124	+	1.36136	2.25055	6.89245	8.06818e-07	2.13721e-05	5.98455
ENSMUSG00000020393.17	protein_coding	Kremen1	1	OTTMUSG00000005082.1	chr11	HAVANA	gene	5141552	5211558	-	1.03067	5.81963	6.99322	6.49604e-07	1.81689e-05	5.97574
ENSMUSG00000114554.3	lncRNA	5430425K12Rik	2	OTTMUSG00000068116.1	chr13	HAVANA	gene	81088530	81096718	+	-3.29926	1.31362	-6.93656	7.33673e-07	2.00444e-05	5.97349
ENSMUSG00000026639.19	protein_coding	Lamb3	2	OTTMUSG00000025453.1	chr1	HAVANA	gene	192890007	193026186	+	1.60788	8.96067	7.00258	6.36694e-07	1.79334e-05	5.9703
ENSMUSG00000044976.18	protein_coding	Wdr72	1	OTTMUSG00000023578.1	chr9	HAVANA	gene	74017638	74190590	+	2.20749	3.15556	6.9161	7.6671e-07	2.0665e-05	5.96626
ENSMUSG00000027883.16	protein_coding	Gpsm2	2	OTTMUSG00000007258.1	chr3	HAVANA	gene	108585954	108629625	-	-1.56227	5.69811	-6.97677	6.72932e-07	1.8665e-05	5.96489
ENSMUSG00000018932.10	protein_coding	Map2k3	2	OTTMUSG00000006341.1	chr11	HAVANA	gene	60822859	60843637	+	-1.03454	6.19858	-6.98793	6.57009e-07	1.8274e-05	5.96227
ENSMUSG00000034227.8	protein_coding	Foxj1	2	OTTMUSG00000003841.1	chr11	HAVANA	gene	116221530	116226225	-	3.34421	0.482903	6.95318	7.07911e-07	1.94734e-05	5.9593
ENSMUSG00000052942.14	protein_coding	Glis3	1	OTTMUSG00000033302.1	chr19	HAVANA	gene	28236251	28657477	-	1.44774	4.22149	6.9213	7.58181e-07	2.04903e-05	5.94422
ENSMUSG00000038781.8	protein_coding	Stap2	2	OTTMUSG00000072336.1	chr17	HAVANA	gene	56304077	56312584	-	1.22731	5.15696	6.95834	7.00098e-07	1.92849e-05	5.93892
ENSMUSG00000058546.9	protein_coding	Rpl23a	2	OTTMUSG00000000095.1	chr11	HAVANA	gene	78071758	78074410	-	-1.15494	8.04073	-6.97367	6.77427e-07	1.87637e-05	5.90842
ENSMUSG00000030271.15	protein_coding	Ogg1	2	OTTMUSG00000022453.1	chr6	HAVANA	gene	113303933	113312029	+	-1.0448	4.03355	-6.89576	8.01078e-07	2.12764e-05	5.90525
ENSMUSG00000012483.5	protein_coding	Rpa3	2	OTTMUSG00000029297.1	chr6	HAVANA	gene	8255936	8259173	-	-1.44946	4.78202	-6.92679	7.49271e-07	2.03594e-05	5.90488
ENSMUSG00000038213.8	protein_coding	Tapbpl	2	OTTMUSG00000034697.1	chr6	HAVANA	gene	125200896	125208823	-	1.21557	4.29554	6.9097	7.77361e-07	2.08754e-05	5.88977
ENSMUSG00000033965.11	protein_coding	Slc16a2	2	OTTMUSG00000018361.1	chrX	HAVANA	gene	102741020	102865589	-	1.4107	2.51234	6.8539	8.76874e-07	2.2776e-05	5.88822
ENSMUSG00000096965.10	lncRNA	3300005D01Rik	2	OTTMUSG00000042742.1	chr17	HAVANA	gene	5848816	5853526	+	-2.92894	0.616961	-6.95157	7.10358e-07	1.94872e-05	5.88333
ENSMUSG00000095440.3	protein_coding	Fignl2	2	OTTMUSG00000063171.1	chr15	HAVANA	gene	100948075	100976448	-	1.53678	3.24851	6.8661	8.54063e-07	2.23575e-05	5.8802
ENSMUSG00000027820.13	protein_coding	Mme	2	OTTMUSG00000051889.1	chr3	HAVANA	gene	63148958	63293451	+	3.93159	1.23946	6.90266	7.89245e-07	2.10179e-05	5.87494
ENSMUSG00000024413.15	protein_coding	Npc1	2	OTTMUSG00000028201.1	chr18	HAVANA	gene	12322749	12369457	-	1.61954	6.42788	6.94943	7.13636e-07	1.95419e-05	5.87279
ENSMUSG00000029752.13	protein_coding	Asns	1	OTTMUSG00000022779.1	chr6	HAVANA	gene	7675169	7693254	-	-1.90595	7.20493	-6.95203	7.09658e-07	1.94872e-05	5.86902
ENSMUSG00000068250.14	protein_coding	Amn1	2	OTTMUSG00000024377.1	chr6	HAVANA	gene	149058645	149090210	-	1.0716	5.04055	6.92321	7.55059e-07	2.04335e-05	5.86863
ENSMUSG00000005580.12	protein_coding	Adcy9	2	OTTMUSG00000027177.1	chr16	HAVANA	gene	4105393	4238362	-	1.48905	4.0834	6.88547	8.19075e-07	2.16111e-05	5.86708
ENSMUSG00000032327.15	protein_coding	Stra6	2	OTTMUSG00000024607.1	chr9	HAVANA	gene	57971071	58061279	+	5.24007	1.03575	6.95857	6.99764e-07	1.92849e-05	5.86501
ENSMUSG00000032040.16	protein_coding	Dcps	1	OTTMUSG00000031937.1	chr9	HAVANA	gene	35035704	35087357	-	-1.14719	4.7525	-6.90953	7.7764e-07	2.08754e-05	5.86319
ENSMUSG00000024844.16	protein_coding	Banf1	2	OTTMUSG00000074270.1	chr19	HAVANA	gene	5414666	5417196	-	-1.55814	7.07132	-6.949	7.14304e-07	1.95419e-05	5.863
ENSMUSG00000047221.6	protein_coding	Fam185a	2	OTTMUSG00000025660.1	chr5	HAVANA	gene	21629956	21687122	+	-1.64004	3.34335	-6.85262	8.79319e-07	2.27804e-05	5.85938
ENSMUSG00000040102.11	protein_coding	Klhl42	2	OTTMUSG00000026057.1	chr6	HAVANA	gene	146992877	147014276	+	-0.865692	4.73492	-6.90611	7.83392e-07	2.09735e-05	5.85229
ENSMUSG00000043336.15	protein_coding	Filip1l	2	OTTMUSG00000034217.1	chr16	HAVANA	gene	57173456	57393489	+	1.66348	5.35338	6.92346	7.54661e-07	2.04335e-05	5.8513
ENSMUSG00000046387.6	protein_coding	Pcdhb17	2	OTTMUSG00000050743.1	chr18	HAVANA	gene	37617848	37622507	+	1.75514	3.08707	6.83784	9.07888e-07	2.33394e-05	5.84961
ENSMUSG00000032060.11	protein_coding	Cryab	2	OTTMUSG00000063076.1	chr9	HAVANA	gene	50662625	50667936	+	2.31034	4.98977	6.90676	7.82299e-07	2.09723e-05	5.84222
ENSMUSG00000101191.8	lncRNA	Gm28809	2	OTTMUSG00000045582.1	chr6	HAVANA	gene	125458326	125461715	+	-3.0328	0.509705	-6.98398	6.62598e-07	1.84039e-05	5.83755
ENSMUSG00000036181.3	protein_coding	H1f2	2	OTTMUSG00000000732.1	chr13	HAVANA	gene	23922791	23924350	+	1.18043	4.9809	6.90992	7.76991e-07	2.08754e-05	5.8329
ENSMUSG00000021932.14	protein_coding	Rnaseh2b	2	OTTMUSG00000019771.1	chr14	HAVANA	gene	62530038	62610441	+	-1.33566	3.88038	-6.86029	8.64854e-07	2.25408e-05	5.82981
ENSMUSG00000052534.16	protein_coding	Pbx1	1	OTTMUSG00000040100.1	chr1	HAVANA	gene	167946933	168259839	-	1.26611	6.48342	6.92856	7.46415e-07	2.03094e-05	5.82205
ENSMUSG00000072582.10	protein_coding	Ptrh2	2	OTTMUSG00000001204.1	chr11	HAVANA	gene	86574811	86583283	+	-1.06627	4.66385	-6.88817	8.14299e-07	2.15134e-05	5.81937
ENSMUSG00000051335.7	protein_coding	Gfod1	2	OTTMUSG00000067253.1	chr13	HAVANA	gene	43348721	43457648	-	-1.68256	4.50064	-6.86262	8.60499e-07	2.24916e-05	5.81153
ENSMUSG00000030849.19	protein_coding	Fgfr2	2	OTTMUSG00000031222.1	chr7	HAVANA	gene	129764181	132725079	-	4.20296	0.838465	6.87349	8.40528e-07	2.20898e-05	5.8108
ENSMUSG00000018593.14	protein_coding	Sparc	2	OTTMUSG00000005692.1	chr11	HAVANA	gene	55285326	55314009	-	1.48382	7.65376	6.92558	7.51225e-07	2.03849e-05	5.80659
ENSMUSG00000078695.9	protein_coding	Cisd3	2	OTTMUSG00000002748.1	chr11	HAVANA	gene	97576652	97579447	+	-1.04268	5.00946	-6.89353	8.04948e-07	2.13508e-05	5.8044
ENSMUSG00000034826.15	protein_coding	Nup54	2	OTTMUSG00000028742.1	chr5	HAVANA	gene	92563399	92583078	-	-0.991502	5.44489	-6.90012	7.93583e-07	2.11053e-05	5.80231
ENSMUSG00000029032.13	protein_coding	Arhgef16	2	OTTMUSG00000010513.1	chr4	HAVANA	gene	154362943	154386133	-	0.958524	5.42703	6.90486	7.85512e-07	2.09742e-05	5.80082
ENSMUSG00000028807.3	protein_coding	Zbtb8a	2	OTTMUSG00000009664.1	chr4	HAVANA	gene	129247421	129271909	-	1.03774	2.7165	6.81729	9.49209e-07	2.41069e-05	5.79486
ENSMUSG00000022744.13	protein_coding	Cldnd1	2	OTTMUSG00000028494.1	chr16	HAVANA	gene	58548273	58554614	+	1.05682	6.82421	6.90538	7.84625e-07	2.09742e-05	5.76788
ENSMUSG00000022031.7	protein_coding	Elp3	2	OTTMUSG00000068852.1	chr14	HAVANA	gene	65767898	65830524	-	-0.59359	5.83877	-6.88882	8.13174e-07	2.15121e-05	5.75603
ENSMUSG00000018697.15	protein_coding	Aatf	2	OTTMUSG00000000987.1	chr11	HAVANA	gene	84313681	84404348	-	-1.29107	5.24878	-6.87056	8.4586e-07	2.22008e-05	5.75337
ENSMUSG00000024397.15	protein_coding	Aif1	2	OTTMUSG00000037184.1	chr17	HAVANA	gene	35389967	35395044	-	4.44627	-2.27529	7.65491	1.6187e-07	6.86781e-06	5.75132
ENSMUSG00000029836.16	protein_coding	Cbx3	2	OTTMUSG00000017280.1	chr6	HAVANA	gene	51447340	51460684	+	-0.927019	5.78388	-6.87974	8.29267e-07	2.18225e-05	5.74736
ENSMUSG00000138580.1	lncRNA	ENSMUSG00000138580	2	NA	chr4	HAVANA	gene	77229102	77232621	+	3.39424	-0.633766	7.1601	4.55037e-07	1.39329e-05	5.74239
ENSMUSG00000051726.7	protein_coding	Kcnf1	2	OTTMUSG00000037668.1	chr12	HAVANA	gene	17222101	17226889	-	-1.94882	2.08296	-6.77464	1.04127e-06	2.59683e-05	5.7409
ENSMUSG00000032357.13	protein_coding	Tinag	2	OTTMUSG00000044835.1	chr9	HAVANA	gene	76858975	76953076	-	6.25218	-2.58582	7.95164	8.84752e-08	4.40748e-06	5.72379
ENSMUSG00000005533.11	protein_coding	Igf1r	2	OTTMUSG00000059602.1	chr7	HAVANA	gene	67602575	67883416	+	0.842878	7.84642	6.88474	8.20359e-07	2.16164e-05	5.71532
ENSMUSG00000025887.11	protein_coding	Casp12	2	OTTMUSG00000033710.1	chr9	HAVANA	gene	5345430	5373032	+	2.17399	-0.00109333	6.8222	9.3916e-07	2.39893e-05	5.71144
ENSMUSG00000055912.9	protein_coding	Tmem150a	2	OTTMUSG00000023352.1	chr6	HAVANA	gene	72332430	72336745	+	1.31459	4.78462	6.83508	9.1333e-07	2.34492e-05	5.70935
ENSMUSG00000022438.7	protein_coding	Parvb	2	OTTMUSG00000026115.1	chr15	HAVANA	gene	84116244	84199889	+	-1.86596	6.44707	-6.86661	8.5312e-07	2.23575e-05	5.70502
ENSMUSG00000040350.17	protein_coding	Trim7	1	OTTMUSG00000005519.1	chr11	HAVANA	gene	48716967	48743036	+	1.09428	3.0695	6.78061	1.02785e-06	2.57619e-05	5.69694
ENSMUSG00000026167.15	protein_coding	Wnt10a	2	OTTMUSG00000020879.1	chr1	HAVANA	gene	74830675	74843338	+	2.06432	3.28185	6.77868	1.03218e-06	2.58333e-05	5.68771
ENSMUSG00000111253.3	lncRNA	Gm34654	2	OTTMUSG00000062902.1	chr9	HAVANA	gene	77703799	77759351	-	4.83198	-1.26643	7.13499	4.79957e-07	1.44753e-05	5.68728
ENSMUSG00000054509.8	protein_coding	Parp4	2	OTTMUSG00000034672.1	chr14	HAVANA	gene	56813076	56897251	+	0.915412	5.85328	6.85723	8.70593e-07	2.26422e-05	5.68544
ENSMUSG00000035735.11	protein_coding	Dagla	2	OTTMUSG00000021192.1	chr19	HAVANA	gene	10222629	10282241	-	-1.25491	6.1366	-6.85306	8.78477e-07	2.27804e-05	5.67022
ENSMUSG00000090150.11	protein_coding	Acad11	1	OTTMUSG00000031729.1	chr9	HAVANA	gene	103940576	104004924	+	1.18139	3.84948	6.77818	1.03328e-06	2.58333e-05	5.66641
ENSMUSG00000045128.10	protein_coding	Rpl18a	2	OTTMUSG00000061602.1	chr8	HAVANA	gene	71347366	71350056	-	-1.14694	8.0058	-6.85991	8.65567e-07	2.25408e-05	5.66127
ENSMUSG00000058056.17	protein_coding	Palld	2	OTTMUSG00000031055.1	chr8	HAVANA	gene	61964467	62355724	-	1.188	6.20136	6.84481	8.94299e-07	2.30789e-05	5.65682
ENSMUSG00000002103.17	protein_coding	Acp2	2	OTTMUSG00000014413.1	chr2	HAVANA	gene	91033230	91044443	+	0.819455	5.8477	6.84296	8.97879e-07	2.31415e-05	5.65485
ENSMUSG00000038274.14	protein_coding	Fau	2	OTTMUSG00000071723.1	chr19	HAVANA	gene	6107874	6109554	+	-1.0305	7.9435	-6.85047	8.83421e-07	2.2841e-05	5.64072
ENSMUSG00000042428.7	protein_coding	Mgat3	2	OTTMUSG00000070845.1	chr15	HAVANA	gene	80057922	80099720	+	1.67829	8.36386	6.85019	8.83938e-07	2.2841e-05	5.6402
ENSMUSG00000031453.17	protein_coding	Rasa3	2	OTTMUSG00000029877.1	chr8	HAVANA	gene	13616948	13727603	-	-1.43783	6.41203	-6.83193	9.1958e-07	2.35794e-05	5.62362
ENSMUSG00000026603.14	protein_coding	Smyd2	2	OTTMUSG00000017096.1	chr1	HAVANA	gene	189612689	189654560	-	-0.904438	5.59994	-6.8201	9.43446e-07	2.4052e-05	5.62125
ENSMUSG00000025374.14	protein_coding	Nabp2	2	OTTMUSG00000035847.1	chr10	HAVANA	gene	128237264	128247361	-	-0.886609	5.29848	-6.79785	9.90084e-07	2.5003e-05	5.58488
ENSMUSG00000021703.10	protein_coding	Serinc5	2	OTTMUSG00000068306.1	chr13	HAVANA	gene	92747599	92848455	+	1.1485	5.26565	6.80145	9.82388e-07	2.48714e-05	5.58379
ENSMUSG00000063229.16	protein_coding	Ldha	2	OTTMUSG00000016500.1	chr7	HAVANA	gene	46490899	46505051	+	-1.26468	10.0773	-6.8235	9.36522e-07	2.39525e-05	5.58363
ENSMUSG00000118383.3	lncRNA	Gm50321	2	OTTMUSG00000073730.1	chr19	HAVANA	gene	9806262	9814309	-	2.26423	1.97977	6.69566	1.23672e-06	2.97675e-05	5.57563
ENSMUSG00000024383.10	protein_coding	Map3k2	2	OTTMUSG00000073161.1	chr18	HAVANA	gene	32296142	32369804	+	-0.977791	7.06728	-6.81725	9.49296e-07	2.41069e-05	5.5739
ENSMUSG00000034850.16	protein_coding	Tmem127	2	OTTMUSG00000016014.1	chr2	HAVANA	gene	127089828	127103027	+	0.693496	6.93335	6.81701	9.49782e-07	2.41069e-05	5.57312
ENSMUSG00000059005.14	protein_coding	Hnrnpa3	2	OTTMUSG00000013249.1	chr2	HAVANA	gene	75489605	75499751	+	-1.15996	8.78857	-6.81982	9.44018e-07	2.4052e-05	5.57279
ENSMUSG00000016239.12	protein_coding	Lonrf3	2	OTTMUSG00000017249.1	chrX	HAVANA	gene	35592006	35625994	+	-1.65398	3.11603	-6.70178	1.22033e-06	2.96221e-05	5.56748
ENSMUSG00000109511.2	protein_coding	Nup62	2	OTTMUSG00000021116.1	chr7	HAVANA	gene	44465512	44480236	+	-1.33586	6.39964	-6.80197	9.81274e-07	2.48714e-05	5.55592
ENSMUSG00000026782.16	protein_coding	Abi2	1	OTTMUSG00000047318.1	chr1	HAVANA	gene	60448778	60520317	+	-1.02624	3.98346	-6.73106	1.14485e-06	2.82001e-05	5.54316
ENSMUSG00000033307.8	protein_coding	Mif	2	OTTMUSG00000065092.1	chr10	HAVANA	gene	75695187	75696074	-	-1.57748	6.59248	-6.79455	9.97194e-07	2.51193e-05	5.53649
ENSMUSG00000022853.8	protein_coding	Ehhadh	2	OTTMUSG00000033863.1	chr16	HAVANA	gene	21580037	21606557	-	1.84478	0.28572	6.74893	1.10114e-06	2.73251e-05	5.53576
ENSMUSG00000054843.10	protein_coding	Atrnl1	2	OTTMUSG00000074316.1	chr19	HAVANA	gene	57599466	58121775	+	0.839911	7.43096	6.79546	9.95231e-07	2.51014e-05	5.52251
ENSMUSG00000021256.6	protein_coding	Vash1	2	OTTMUSG00000029994.1	chr12	HAVANA	gene	86725474	86738865	+	2.76541	-0.0807659	6.82663	9.30196e-07	2.38211e-05	5.51915
ENSMUSG00000024381.18	protein_coding	Bin1	2	OTTMUSG00000073173.1	chr18	HAVANA	gene	32510283	32568790	+	-0.786963	6.17074	-6.78262	1.02336e-06	2.56815e-05	5.51608
ENSMUSG00000014813.10	protein_coding	Stc1	2	OTTMUSG00000068946.1	chr14	HAVANA	gene	69266687	69279253	+	-6.29528	1.62494	-6.93529	7.35674e-07	2.00717e-05	5.51
ENSMUSG00000142093.1	lncRNA	ENSMUSG00000142093	2	NA	chr2	HAVANA	gene	60523134	60543531	+	5.43341	-2.14355	7.68767	1.51339e-07	6.5317e-06	5.5089
ENSMUSG00000027329.10	protein_coding	Spef1	2	OTTMUSG00000015912.1	chr2	HAVANA	gene	131012181	131029202	-	-1.32711	3.92891	-6.71835	1.17699e-06	2.87443e-05	5.50757
ENSMUSG00000120545.2	lncRNA	Gm56703	2	NA	chr15	HAVANA	gene	36865214	36866511	-	-4.12018	-0.805949	-7.19476	4.22803e-07	1.32091e-05	5.50529
ENSMUSG00000026944.19	protein_coding	Abca2	2	OTTMUSG00000012108.1	chr2	HAVANA	gene	25318715	25338552	+	0.753262	7.51183	6.7873	1.01302e-06	2.54859e-05	5.5039
ENSMUSG00000018379.18	protein_coding	Srsf1	2	OTTMUSG00000001473.1	chr11	HAVANA	gene	87938199	87944581	+	-0.902929	8.45634	-6.78498	1.01814e-06	2.55826e-05	5.49657
ENSMUSG00000029464.11	protein_coding	Gpn3	2	OTTMUSG00000026635.1	chr5	HAVANA	gene	122509939	122520965	+	-1.24893	4.39726	-6.72117	1.16979e-06	2.87085e-05	5.49589
ENSMUSG00000053646.14	protein_coding	Plxnb1	2	OTTMUSG00000021053.1	chr9	HAVANA	gene	108924457	108948985	+	1.52451	6.5789	6.77542	1.03951e-06	2.59568e-05	5.48771
ENSMUSG00000020988.10	protein_coding	L2hgdh	2	OTTMUSG00000065765.1	chr12	HAVANA	gene	69737207	69771647	-	-0.725354	4.61172	-6.73373	1.1382e-06	2.81088e-05	5.48506
ENSMUSG00000020918.15	protein_coding	Kat2a	2	OTTMUSG00000002053.1	chr11	HAVANA	gene	100595572	100603291	-	-1.12169	5.98321	-6.76209	1.07007e-06	2.65871e-05	5.4814
ENSMUSG00000004667.19	protein_coding	Polr2e	2	OTTMUSG00000019133.1	chr10	HAVANA	gene	79871783	79875629	-	-0.939385	6.44764	-6.76964	1.05263e-06	2.6219e-05	5.48121
ENSMUSG00000031787.9	protein_coding	Katnb1	2	OTTMUSG00000061713.1	chr8	HAVANA	gene	95807814	95829777	+	-0.665289	4.47222	-6.72362	1.16354e-06	2.85903e-05	5.47378
ENSMUSG00000027597.16	protein_coding	Ahcy	2	OTTMUSG00000016006.1	chr2	HAVANA	gene	154901230	154916417	-	-1.84457	4.47036	-6.70712	1.20619e-06	2.93144e-05	5.47027
ENSMUSG00000028081.7	protein_coding	Rps3a1	2	OTTMUSG00000035152.1	chr3	HAVANA	gene	86045247	86050009	-	-1.2815	6.8741	-6.76576	1.06156e-06	2.64084e-05	5.46656
ENSMUSG00000025264.13	protein_coding	Tsr2	2	OTTMUSG00000019291.1	chrX	HAVANA	gene	149870090	149879539	-	-1.51316	3.92809	-6.68745	1.25909e-06	3.0089e-05	5.46621
ENSMUSG00000051910.14	protein_coding	Sox6	2	OTTMUSG00000058723.1	chr7	HAVANA	gene	115070107	115638031	-	3.26533	-0.895036	7.04712	5.78812e-07	1.66694e-05	5.46315
ENSMUSG00000051029.9	protein_coding	Serpinb1b	2	OTTMUSG00000000700.1	chr13	HAVANA	gene	33262558	33278363	+	5.28424	-2.51063	7.80695	1.18606e-07	5.4728e-06	5.45634
ENSMUSG00000038347.16	lncRNA	Tcte2	1	OTTMUSG00000029014.1	chr17	HAVANA	gene	13932706	13982087	-	1.41204	1.10484	6.6391	1.39956e-06	3.27042e-05	5.44277
ENSMUSG00000040824.4	protein_coding	Snrpd2	2	OTTMUSG00000029193.1	chr7	HAVANA	gene	18883647	18887467	+	-1.31815	5.21749	-6.72588	1.15784e-06	2.84852e-05	5.43452
ENSMUSG00000005949.10	protein_coding	Ctns	2	OTTMUSG00000006124.1	chr11	HAVANA	gene	73074422	73089868	-	1.39309	4.25234	6.69572	1.23656e-06	2.97675e-05	5.42701
ENSMUSG00000039958.18	protein_coding	Etfbkmt	2	OTTMUSG00000026169.1	chr6	HAVANA	gene	149041347	149052669	+	1.44187	3.00193	6.65015	1.36612e-06	3.20725e-05	5.42045
ENSMUSG00000070953.14	protein_coding	Rabepk	1	OTTMUSG00000012015.1	chr2	HAVANA	gene	34667568	34689924	-	-0.827198	4.10608	-6.6795	1.28116e-06	3.0471e-05	5.41469
ENSMUSG00000003868.15	protein_coding	Ruvbl2	2	OTTMUSG00000023863.1	chr7	HAVANA	gene	45071184	45087520	-	-1.62132	6.34096	-6.7327	1.14075e-06	2.81338e-05	5.40858
ENSMUSG00000044155.12	protein_coding	Lsm8	2	OTTMUSG00000024331.1	chr6	HAVANA	gene	18848578	18855750	+	-1.30997	5.38968	-6.7102	1.1981e-06	2.91888e-05	5.39785
ENSMUSG00000014496.9	protein_coding	Ankrd28	2	OTTMUSG00000069842.1	chr14	HAVANA	gene	31420725	31552608	-	-1.00981	6.8381	-6.73367	1.13833e-06	2.81088e-05	5.39457
ENSMUSG00000062797.15	protein_coding	Hikeshi	1	OTTMUSG00000023022.1	chr7	HAVANA	gene	89566737	89590412	-	-0.887007	4.64002	-6.69188	1.24698e-06	2.99784e-05	5.39356
ENSMUSG00000060002.15	protein_coding	Chpt1	2	OTTMUSG00000031940.1	chr10	HAVANA	gene	88288607	88339935	-	1.40421	4.97435	6.6965	1.23447e-06	2.97675e-05	5.38983
ENSMUSG00000030206.14	protein_coding	Gsg1	2	OTTMUSG00000023084.1	chr6	HAVANA	gene	135214324	135231349	-	-3.41952	-0.778922	-6.98862	6.56035e-07	1.82723e-05	5.38954
ENSMUSG00000030522.15	protein_coding	Mtmr10	2	OTTMUSG00000037228.1	chr7	HAVANA	gene	63937401	63990554	+	-1.3919	6.25512	-6.71894	1.17548e-06	2.87443e-05	5.38203
ENSMUSG00000062006.13	protein_coding	Rpl34	2	OTTMUSG00000023379.1	chr3	HAVANA	gene	130520480	130524047	-	-1.18897	6.04547	-6.71488	1.18594e-06	2.89277e-05	5.3721
ENSMUSG00000030284.14	protein_coding	Creld1	2	OTTMUSG00000023299.1	chr6	HAVANA	gene	113460258	113470304	+	0.8827	5.40868	6.69854	1.22898e-06	2.97675e-05	5.36328
ENSMUSG00000031633.5	protein_coding	Slc25a4	2	OTTMUSG00000016487.1	chr8	HAVANA	gene	46659834	46664321	-	-1.0879	8.20714	-6.71955	1.17392e-06	2.87443e-05	5.35373
ENSMUSG00000015023.8	protein_coding	Ddx19a	2	OTTMUSG00000031897.1	chr8	HAVANA	gene	111701628	111724432	-	-0.765357	5.44448	-6.69586	1.23619e-06	2.97675e-05	5.35329
ENSMUSG00000033295.15	protein_coding	Ptprf	2	OTTMUSG00000008720.1	chr4	HAVANA	gene	118065410	118148602	-	1.05307	9.09612	6.71854	1.17649e-06	2.87443e-05	5.35127
ENSMUSG00000038388.15	protein_coding	Pals2	2	OTTMUSG00000035974.1	chr6	HAVANA	gene	50087221	50175919	+	-2.3527	5.03127	-6.66978	1.30866e-06	3.10513e-05	5.34795
ENSMUSG00000054226.14	protein_coding	Tprkb	2	OTTMUSG00000023849.1	chr6	HAVANA	gene	85888847	85907266	+	-0.843044	5.31053	-6.68965	1.25306e-06	3.00166e-05	5.3438
ENSMUSG00000081752.4	processed_pseudogene	Sms-ps	2	OTTMUSG00000017637.1	chrX	HAVANA	gene	61819191	61820291	-	-1.50062	0.989081	-6.60233	1.51708e-06	3.48409e-05	5.33922
ENSMUSG00000114511.2	lncRNA	0710001A04Rik	2	OTTMUSG00000068573.1	chr18	HAVANA	gene	25846827	25852204	+	-4.23582	0.156548	-6.83918	9.0525e-07	2.33015e-05	5.33604
ENSMUSG00000061286.8	protein_coding	Exosc5	2	OTTMUSG00000058396.1	chr7	HAVANA	gene	25358589	25370793	+	-0.900116	4.63154	-6.66077	1.33471e-06	3.15285e-05	5.33573
ENSMUSG00000029063.17	protein_coding	Nadk	2	OTTMUSG00000010726.1	chr4	HAVANA	gene	155646835	155675458	+	-0.92716	7.54489	-6.70921	1.20068e-06	2.9216e-05	5.33374
ENSMUSG00000028217.12	protein_coding	Cdh17	2	OTTMUSG00000004521.1	chr4	HAVANA	gene	11758147	11817895	+	-2.13467	6.20357	-6.68881	1.25537e-06	3.00359e-05	5.33345
ENSMUSG00000004151.18	protein_coding	Etv1	1	OTTMUSG00000035098.1	chr12	HAVANA	gene	38829379	38920483	+	-6.77966	-0.193446	-7.2253	3.9635e-07	1.25194e-05	5.33208
ENSMUSG00000031197.12	protein_coding	Vbp1	2	OTTMUSG00000020873.1	chrX	HAVANA	gene	74557905	74578548	+	-0.873699	5.6342	-6.69072	1.25013e-06	3.00166e-05	5.33112
ENSMUSG00000038299.17	protein_coding	Wdr36	2	OTTMUSG00000073174.1	chr18	HAVANA	gene	32970278	33000647	+	-1.20147	6.469	-6.69766	1.23134e-06	2.97675e-05	5.32605
ENSMUSG00000104011.4	lncRNA	Gm32391	2	OTTMUSG00000049862.1	chr1	HAVANA	gene	164284478	164292059	+	3.35933	-0.339025	6.73431	1.13675e-06	2.81088e-05	5.31956
ENSMUSG00000032239.11	protein_coding	Rp9	2	OTTMUSG00000062377.1	chr9	HAVANA	gene	22322343	22381039	-	-0.839362	4.86996	-6.66787	1.31414e-06	3.11444e-05	5.31926
ENSMUSG00000121295.2	lncRNA	BC021767	2	NA	chr3	HAVANA	gene	94567902	94573426	-	1.62221	2.11557	6.57671	1.60493e-06	3.60317e-05	5.31894
ENSMUSG00000024986.13	protein_coding	Hhex	1	OTTMUSG00000021162.1	chr19	HAVANA	gene	37423258	37429179	+	-1.3251	2.53757	-6.57138	1.62385e-06	3.6375e-05	5.31272
ENSMUSG00000090553.9	protein_coding	Snrpe	2	OTTMUSG00000035312.1	chr1	HAVANA	gene	133531609	133538029	-	-1.25165	5.64164	-6.67963	1.2808e-06	3.0471e-05	5.3116
ENSMUSG00000068335.7	protein_coding	Dok1	2	OTTMUSG00000023337.1	chr6	HAVANA	gene	83007915	83010452	-	-0.921058	5.21124	-6.67078	1.30581e-06	3.10204e-05	5.30576
ENSMUSG00000030814.18	protein_coding	Bcl7c	2	OTTMUSG00000023194.1	chr7	HAVANA	gene	127260628	127308105	-	-1.13177	4.23637	-6.63579	1.40974e-06	3.29038e-05	5.30416
ENSMUSG00000047250.14	protein_coding	Ptgs1	2	OTTMUSG00000012142.1	chr2	HAVANA	gene	36120438	36142284	+	1.5247	6.32026	6.68985	1.25251e-06	3.00166e-05	5.30201
ENSMUSG00000059327.10	protein_coding	Eda	2	OTTMUSG00000018058.1	chrX	HAVANA	gene	99019212	99444368	+	1.90058	1.0987	6.56266	1.65532e-06	3.67919e-05	5.29508
ENSMUSG00000030216.13	protein_coding	Wbp11	2	OTTMUSG00000023417.1	chr6	HAVANA	gene	136790652	136805231	-	-0.940045	6.79497	-6.68547	1.26455e-06	3.01834e-05	5.29113
ENSMUSG00000022864.15	protein_coding	D16Ertd472e	2	OTTMUSG00000019868.1	chr16	HAVANA	gene	78337226	78373596	-	-1.65075	3.22078	-6.56837	1.63464e-06	3.65349e-05	5.2848
ENSMUSG00000078713.9	protein_coding	Tomm5	2	OTTMUSG00000007500.1	chr4	HAVANA	gene	45105208	45108114	-	-1.42231	4.3209	-6.62317	1.44928e-06	3.35142e-05	5.27771
ENSMUSG00000032349.14	protein_coding	Elovl5	2	OTTMUSG00000022986.1	chr9	HAVANA	gene	77824646	77891801	+	0.854336	8.11647	6.68361	1.26972e-06	3.02707e-05	5.27442
ENSMUSG00000020629.13	protein_coding	Adi1	1	OTTMUSG00000022994.1	chr12	HAVANA	gene	28725230	28732174	+	-1.07404	5.6839	-6.66412	1.32499e-06	3.13643e-05	5.27061
ENSMUSG00000026245.17	protein_coding	Farsb	2	OTTMUSG00000047790.1	chr1	HAVANA	gene	78394612	78465534	-	-1.24694	5.91353	-6.65996	1.33709e-06	3.15285e-05	5.26155
ENSMUSG00000039903.19	protein_coding	Eva1c	2	OTTMUSG00000019912.1	chr16	HAVANA	gene	90623607	90701997	+	-1.08344	4.75733	-6.63143	1.4233e-06	3.31045e-05	5.25905
ENSMUSG00000067288.14	protein_coding	Rps28	2	OTTMUSG00000037209.1	chr17	HAVANA	gene	34038001	34043536	-	-1.14282	5.97295	-6.65957	1.33822e-06	3.15285e-05	5.25035
ENSMUSG00000048852.14	protein_coding	Gm12185	2	OTTMUSG00000005523.1	chr11	HAVANA	gene	48795483	48883053	-	2.41462	0.138026	6.61778	1.46651e-06	3.38736e-05	5.24762
ENSMUSG00000097310.4	lncRNA	A930038B10Rik	2	OTTMUSG00000070001.1	chr14	HAVANA	gene	34481077	34492510	+	1.87863	-0.00468186	6.59163	1.55316e-06	3.54255e-05	5.24536
ENSMUSG00000073758.11	protein_coding	Sh3d21	2	OTTMUSG00000009352.1	chr4	HAVANA	gene	126044395	126057284	-	1.36603	3.50228	6.58093	1.59011e-06	3.59683e-05	5.24428
ENSMUSG00000015806.13	protein_coding	Qdpr	2	OTTMUSG00000053872.1	chr5	HAVANA	gene	45591363	45607578	-	-1.00998	4.99667	-6.62817	1.43349e-06	3.32258e-05	5.2309
ENSMUSG00000052997.16	protein_coding	Uba2	2	OTTMUSG00000008405.1	chr7	HAVANA	gene	33840113	33869024	-	-1.00741	7.10047	-6.65959	1.33816e-06	3.15285e-05	5.22955
ENSMUSG00000022092.12	protein_coding	Ppp3cc	2	OTTMUSG00000069176.1	chr14	HAVANA	gene	70455314	70526920	-	-1.26179	3.34342	-6.56359	1.65192e-06	3.67571e-05	5.22747
ENSMUSG00000036985.13	protein_coding	Zdhhc9	2	OTTMUSG00000017508.1	chrX	HAVANA	gene	47260846	47297755	-	0.807991	6.16209	6.65285	1.35806e-06	3.19584e-05	5.2263
ENSMUSG00000142562.1	lncRNA	ENSMUSG00000142562	2	NA	chr17	HAVANA	gene	35409602	35415155	-	4.78337	-3.4156	8.2645	4.73966e-08	2.885e-06	5.21993
ENSMUSG00000074415.18	lncRNA	Mir100hg	2	OTTMUSG00000042492.1	chr9	HAVANA	gene	41238321	41628290	+	-2.27171	7.61219	-6.65054	1.36494e-06	3.20725e-05	5.20823
ENSMUSG00000027404.17	protein_coding	Snrpb	2	OTTMUSG00000015496.1	chr2	HAVANA	gene	130013555	130021323	-	-1.13945	6.91396	-6.64761	1.37373e-06	3.21758e-05	5.20538
ENSMUSG00000038718.16	protein_coding	Pbx3	2	OTTMUSG00000011928.1	chr2	HAVANA	gene	34061469	34263154	-	-0.84308	4.07172	-6.5799	1.59371e-06	3.59683e-05	5.20281
ENSMUSG00000026104.15	protein_coding	Stat1	1	OTTMUSG00000046734.1	chr1	HAVANA	gene	52158599	52201024	+	1.11565	3.0317	6.54058	1.73775e-06	3.8242e-05	5.20021
ENSMUSG00000058655.10	protein_coding	Eif4b	2	OTTMUSG00000071234.1	chr15	HAVANA	gene	101982208	102005608	+	-0.834884	9.77497	-6.64794	1.37273e-06	3.21758e-05	5.19694
ENSMUSG00000032456.14	protein_coding	Nmnat3	2	OTTMUSG00000022653.1	chr9	HAVANA	gene	98169488	98302491	+	0.870988	3.69798	6.56674	1.64053e-06	3.66042e-05	5.19294
ENSMUSG00000009894.16	protein_coding	Snap47	1	OTTMUSG00000005789.1	chr11	HAVANA	gene	59297960	59342012	-	0.78119	5.71126	6.62917	1.43034e-06	3.31912e-05	5.18906
ENSMUSG00000062070.13	protein_coding	Pgk1	2	OTTMUSG00000018277.1	chrX	HAVANA	gene	105230706	105247305	+	-1.02558	7.30493	-6.64164	1.39179e-06	3.25607e-05	5.18607
ENSMUSG00000020400.18	protein_coding	Tnip1	2	OTTMUSG00000006334.1	chr11	HAVANA	gene	54801611	54853743	-	1.09491	6.11773	6.63029	1.42684e-06	3.31483e-05	5.18406
ENSMUSG00000058427.11	protein_coding	Cxcl2	2	OTTMUSG00000055510.1	chr5	HAVANA	gene	91051730	91053797	+	3.65953	0.282096	6.5824	1.58498e-06	3.5906e-05	5.18225
ENSMUSG00000020590.17	protein_coding	Snx13	2	OTTMUSG00000067058.1	chr12	HAVANA	gene	35097185	35197478	+	0.698125	6.27484	6.63359	1.41657e-06	3.30247e-05	5.18222
ENSMUSG00000117679.2	protein_coding	Apbb3	2	OTTMUSG00000073393.1	chr18	HAVANA	gene	36804207	36812419	-	0.952123	4.80067	6.59427	1.5442e-06	3.53015e-05	5.18182
ENSMUSG00000021548.11	protein_coding	Ccnh	2	OTTMUSG00000035504.1	chr13	HAVANA	gene	85337527	85371588	+	-0.908636	4.26657	-6.57919	1.5962e-06	3.59683e-05	5.18016
ENSMUSG00000029103.17	protein_coding	Lrpap1	2	OTTMUSG00000023232.1	chr5	HAVANA	gene	35248845	35263110	-	0.905133	5.72677	6.62452	1.44501e-06	3.3454e-05	5.17929
ENSMUSG00000001053.16	protein_coding	N4bp3	2	OTTMUSG00000005606.1	chr11	HAVANA	gene	51533890	51541669	-	-1.55417	3.34473	-6.54182	1.73302e-06	3.81797e-05	5.17308
ENSMUSG00000005251.16	protein_coding	Ripk4	2	OTTMUSG00000019977.1	chr16	HAVANA	gene	97543133	97564987	-	0.844561	6.37083	6.63165	1.42261e-06	3.31045e-05	5.17244
ENSMUSG00000019832.6	protein_coding	Rab32	2	OTTMUSG00000027515.1	chr10	HAVANA	gene	10420746	10434009	-	1.36483	2.44764	6.52928	1.7816e-06	3.89927e-05	5.16911
ENSMUSG00000024776.19	protein_coding	Stambpl1	2	OTTMUSG00000028400.1	chr19	HAVANA	gene	34169629	34217733	+	-0.944961	5.46165	-6.60483	1.50878e-06	3.47298e-05	5.16329
ENSMUSG00000030340.17	protein_coding	Scnn1a	1	OTTMUSG00000038566.1	chr6	HAVANA	gene	125297622	125321906	+	2.34841	3.27027	6.53294	1.76727e-06	3.87213e-05	5.15478
ENSMUSG00000026327.9	protein_coding	Serpinb11	2	OTTMUSG00000020991.1	chr1	HAVANA	gene	107288928	107308205	+	3.38063	1.49652	6.49404	1.9257e-06	4.15113e-05	5.15164
ENSMUSG00000030761.17	protein_coding	Myo7a	2	OTTMUSG00000017631.1	chr7	HAVANA	gene	97700267	97768731	-	3.78086	3.67988	6.50725	1.87033e-06	4.04485e-05	5.1507
ENSMUSG00000007030.9	protein_coding	Vwa7	2	OTTMUSG00000033048.1	chr17	HAVANA	gene	35235555	35245717	+	2.70311	2.85733	6.51009	1.85861e-06	4.03255e-05	5.14831
ENSMUSG00000026174.10	protein_coding	Cnot9	2	OTTMUSG00000021742.1	chr1	HAVANA	gene	74545217	74570001	+	-1.04532	5.96762	-6.61038	1.49053e-06	3.43492e-05	5.14673
ENSMUSG00000028089.6	protein_coding	Chd1l	2	OTTMUSG00000053233.1	chr3	HAVANA	gene	97468058	97517519	-	-0.86353	4.75231	-6.57917	1.59628e-06	3.59683e-05	5.14632
ENSMUSG00000041417.16	protein_coding	Pik3r1	2	OTTMUSG00000048150.1	chr13	HAVANA	gene	101817071	101904725	-	1.26694	6.14011	6.61145	1.48703e-06	3.43079e-05	5.14553
ENSMUSG00000134964.1	lncRNA	ENSMUSG00000134964	2	NA	chr18	HAVANA	gene	11015949	11017947	+	2.44044	2.47469	6.49277	1.93111e-06	4.15386e-05	5.14315
ENSMUSG00000031358.18	protein_coding	Msl3	2	OTTMUSG00000019558.1	chrX	HAVANA	gene	167437113	167456894	-	-0.698528	5.34885	-6.599	1.52821e-06	3.4976e-05	5.1424
ENSMUSG00000087113.3	lncRNA	Gm11714	2	OTTMUSG00000003630.1	chr11	HAVANA	gene	107319055	107326515	+	-3.07214	0.111875	-6.58252	1.58456e-06	3.5906e-05	5.13492
ENSMUSG00000040269.6	protein_coding	Mrps28	2	OTTMUSG00000022361.1	chr3	HAVANA	gene	8867206	8988978	-	-1.48311	3.2935	-6.50478	1.88055e-06	4.06257e-05	5.11234
ENSMUSG00000014303.14	protein_coding	Glis2	2	OTTMUSG00000026679.1	chr16	HAVANA	gene	4412577	4442788	+	0.882623	6.40561	6.60037	1.52362e-06	3.49273e-05	5.10372
ENSMUSG00000025875.15	protein_coding	Tspan17	1	OTTMUSG00000032673.1	chr13	HAVANA	gene	54937190	54944589	+	1.20233	4.47018	6.54853	1.70759e-06	3.77024e-05	5.09739
ENSMUSG00000007892.9	protein_coding	Rplp1	2	OTTMUSG00000062531.1	chr9	HAVANA	gene	61820566	61821824	-	-1.21464	8.64378	-6.60233	1.51709e-06	3.48409e-05	5.09478
ENSMUSG00000015575.16	protein_coding	Atp6v0e	2	OTTMUSG00000073635.1	chr17	HAVANA	gene	26882205	26918621	+	0.86754	6.4064	6.59027	1.55782e-06	3.54635e-05	5.08314
ENSMUSG00000029446.15	protein_coding	Psph	2	OTTMUSG00000027654.1	chr5	HAVANA	gene	129842622	129864513	-	-1.75529	4.74615	-6.53949	1.74194e-06	3.82832e-05	5.0783
ENSMUSG00000037049.10	protein_coding	Smpd1	2	OTTMUSG00000060466.1	chr7	HAVANA	gene	105203567	105207596	+	0.839323	5.64995	6.57905	1.59671e-06	3.59683e-05	5.07822
ENSMUSG00000038648.6	protein_coding	Creb3l2	2	OTTMUSG00000023205.1	chr6	HAVANA	gene	37304190	37419081	-	1.05233	7.3972	6.59011	1.55837e-06	3.54635e-05	5.07426
ENSMUSG00000023456.17	protein_coding	Tpi1	2	OTTMUSG00000017534.1	chr6	HAVANA	gene	124787549	124791259	-	-0.878224	9.3915	-6.59186	1.55236e-06	3.54255e-05	5.07187
ENSMUSG00000017724.15	protein_coding	Etv4	2	OTTMUSG00000002089.1	chr11	HAVANA	gene	101660568	101676197	-	-6.88375	3.06948	-6.46288	2.06304e-06	4.33065e-05	5.07181
ENSMUSG00000036918.17	protein_coding	Ttc7	2	OTTMUSG00000028525.1	chr17	HAVANA	gene	87590314	87689197	+	-0.924573	4.87421	-6.55013	1.70161e-06	3.76119e-05	5.07132
ENSMUSG00000074024.8	lncRNA	4632427E13Rik	2	OTTMUSG00000022520.1	chr7	HAVANA	gene	92381862	92390736	-	1.26075	2.86622	6.47103	2.02617e-06	4.29163e-05	5.0712
ENSMUSG00000010755.18	protein_coding	Cars1	1	OTTMUSG00000024014.1	chr7	HAVANA	gene	143110967	143153827	-	-1.15426	7.26711	-6.5885	1.56388e-06	3.55486e-05	5.06983
ENSMUSG00000000194.14	protein_coding	Gpr107	1	OTTMUSG00000011925.1	chr2	HAVANA	gene	31042328	31108787	+	0.786003	6.31676	6.58324	1.58206e-06	3.5906e-05	5.06964
ENSMUSG00000028521.18	protein_coding	Slc35d1	2	OTTMUSG00000008067.1	chr4	HAVANA	gene	103027846	103072361	-	-1.17327	6.58729	-6.57695	1.6041e-06	3.60317e-05	5.0624
ENSMUSG00000030681.19	protein_coding	Mvp	2	OTTMUSG00000025144.1	chr7	HAVANA	gene	126586032	126613793	-	1.30969	7.05135	6.5784	1.599e-06	3.59792e-05	5.0523
ENSMUSG00000033186.10	protein_coding	Mzt1	2	OTTMUSG00000069544.1	chr14	HAVANA	gene	99271980	99283570	-	-0.817246	5.72938	-6.5665	1.64139e-06	3.66042e-05	5.05161
ENSMUSG00000017561.17	protein_coding	Crlf3	2	OTTMUSG00000000187.1	chr11	HAVANA	gene	79937319	79971817	-	-0.718744	5.39261	-6.55668	1.67722e-06	3.72373e-05	5.04964
ENSMUSG00000026987.17	protein_coding	Baz2b	2	OTTMUSG00000012818.1	chr2	HAVANA	gene	59729707	60040183	-	0.939863	6.17038	6.57063	1.62653e-06	3.63944e-05	5.04885
ENSMUSG00000014599.11	protein_coding	Csf1	2	OTTMUSG00000026573.1	chr3	HAVANA	gene	107648364	107667785	-	2.65659	6.81985	6.57266	1.61929e-06	3.63134e-05	5.04467
ENSMUSG00000022014.17	protein_coding	Epsti1	2	OTTMUSG00000069118.1	chr14	HAVANA	gene	78141679	78240097	+	2.07248	0.976764	6.44152	2.16294e-06	4.48395e-05	5.03579
ENSMUSG00000126857.1	lncRNA	ENSMUSG00000126857	2	NA	chr9	HAVANA	gene	69986904	69991535	-	-3.0801	-1.1623	-6.92916	7.4545e-07	2.03094e-05	5.03187
ENSMUSG00000034685.5	protein_coding	Fam171a2	2	OTTMUSG00000002855.1	chr11	HAVANA	gene	102327807	102338508	-	1.08488	5.21364	6.55045	1.70039e-06	3.76119e-05	5.02805
ENSMUSG00000038957.14	protein_coding	Edc3	2	OTTMUSG00000033365.1	chr9	HAVANA	gene	57615823	57659782	+	-0.576071	5.114	-6.53386	1.76368e-06	3.86849e-05	5.01529
ENSMUSG00000021910.16	protein_coding	Nisch	2	OTTMUSG00000035875.1	chr14	HAVANA	gene	30892887	30938903	-	0.719941	9.04659	6.56584	1.64377e-06	3.66164e-05	5.01359
ENSMUSG00000024856.11	protein_coding	Cdk2ap2	2	OTTMUSG00000037016.1	chr19	HAVANA	gene	4147182	4149019	+	-1.14231	6.59026	-6.55551	1.68156e-06	3.72922e-05	5.00498
ENSMUSG00000028654.14	protein_coding	Mycl	2	OTTMUSG00000008931.1	chr4	HAVANA	gene	122889445	122896278	+	2.00584	1.01081	6.43194	2.20939e-06	4.53333e-05	4.99681
ENSMUSG00000009739.19	protein_coding	Pou6f1	2	OTTMUSG00000039916.1	chr15	HAVANA	gene	100473199	100497865	-	1.49819	4.48461	6.49333	1.92869e-06	4.15311e-05	4.99674
ENSMUSG00000114822.2	processed_pseudogene	Gm4813	2	OTTMUSG00000068122.1	chr13	HAVANA	gene	81177222	81178020	-	-2.49608	0.820199	-6.4703	2.02945e-06	4.29163e-05	4.99516
ENSMUSG00000026393.11	protein_coding	Nek7	2	OTTMUSG00000049434.1	chr1	HAVANA	gene	138410613	138547879	-	-0.977183	6.94242	-6.551	1.69835e-06	3.76119e-05	4.99021
ENSMUSG00000041632.8	protein_coding	Mrps27	2	OTTMUSG00000067819.1	chr13	HAVANA	gene	99481294	99552070	+	-1.05693	4.82923	-6.5109	1.8553e-06	4.02973e-05	4.98296
ENSMUSG00000038517.16	protein_coding	Tbkbp1	2	OTTMUSG00000002304.1	chr11	HAVANA	gene	97026997	97042321	-	-1.55967	2.98675	-6.4245	2.24612e-06	4.59926e-05	4.97748
ENSMUSG00000034617.8	protein_coding	Mtrr	2	OTTMUSG00000067117.1	chr13	HAVANA	gene	68708899	68730268	-	-1.15198	4.36947	-6.48164	1.97918e-06	4.22099e-05	4.97625
ENSMUSG00000063531.8	protein_coding	Sema3e	2	OTTMUSG00000029684.1	chr5	HAVANA	gene	14075290	14306703	+	1.33972	7.62765	6.54522	1.7201e-06	3.7937e-05	4.97149
ENSMUSG00000031351.16	protein_coding	Zfp185	2	OTTMUSG00000017674.1	chrX	HAVANA	gene	72030945	72075149	+	1.41032	3.6056	6.46846	2.03771e-06	4.29885e-05	4.9668
ENSMUSG00000049643.16	protein_coding	2310022A10Rik	2	OTTMUSG00000046071.1	chr7	HAVANA	gene	27252658	27281524	+	-0.870679	3.98145	-6.46681	2.04519e-06	4.30672e-05	4.9543
ENSMUSG00000002032.18	protein_coding	Tmem25	2	OTTMUSG00000016729.1	chr9	HAVANA	gene	44705066	44710604	-	1.99386	1.24345	6.40321	2.35479e-06	4.73939e-05	4.95274
ENSMUSG00000028347.15	protein_coding	Tmeff1	2	OTTMUSG00000006852.1	chr4	HAVANA	gene	48585174	48663131	+	1.23612	5.15834	6.5116	1.85243e-06	4.02973e-05	4.94982
ENSMUSG00000038766.17	protein_coding	Gabpb2	2	OTTMUSG00000022326.1	chr3	HAVANA	gene	95089077	95125227	-	-0.730014	6.84939	-6.5257	1.79573e-06	3.9259e-05	4.93535
ENSMUSG00000063480.9	protein_coding	Snu13	2	OTTMUSG00000035736.1	chr15	HAVANA	gene	81924726	81931799	-	-1.41623	5.12106	-6.49169	1.93572e-06	4.15707e-05	4.93156
ENSMUSG00000062683.12	protein_coding	Atp5mc2	2	OTTMUSG00000047926.1	chr15	HAVANA	gene	102571299	102580787	-	-0.93601	4.98095	-6.49003	1.94283e-06	4.15707e-05	4.92724
ENSMUSG00000028333.11	protein_coding	Anp32b	2	OTTMUSG00000006891.1	chr4	HAVANA	gene	46450902	46472657	+	-1.27717	7.61825	-6.5227	1.80763e-06	3.94762e-05	4.92218
ENSMUSG00000040181.15	protein_coding	Fmo1	2	OTTMUSG00000024069.1	chr1	HAVANA	gene	162657130	162694179	-	3.11487	1.65764	6.38704	2.44091e-06	4.87355e-05	4.91198
ENSMUSG00000118376.3	lncRNA	Gm9926	2	OTTMUSG00000074309.1	chr18	HAVANA	gene	66637202	66650886	+	3.23543	5.03545	6.47034	2.02926e-06	4.29163e-05	4.91197
ENSMUSG00000057497.9	protein_coding	Fam136a	2	OTTMUSG00000056432.1	chr6	HAVANA	gene	86342628	86347040	+	-1.0822	5.36053	-6.48999	1.94298e-06	4.15707e-05	4.90831
ENSMUSG00000048170.15	protein_coding	Mcmbp	1	OTTMUSG00000029389.1	chr7	HAVANA	gene	128298165	128342219	-	-0.809472	6.56937	-6.51093	1.85516e-06	4.02973e-05	4.90735
ENSMUSG00000030127.16	protein_coding	Cops7a	2	OTTMUSG00000023393.1	chr6	HAVANA	gene	124935376	124942501	-	-0.880383	6.82139	-6.51159	1.85247e-06	4.02973e-05	4.90492
ENSMUSG00000120081.1	lncRNA	Gm57354	2	NA	chr11	HAVANA	gene	31820874	31821796	+	1.58808	2.52917	6.38497	2.45218e-06	4.87772e-05	4.90157
ENSMUSG00000021650.8	protein_coding	Ptcd2	2	OTTMUSG00000067805.1	chr13	HAVANA	gene	99456155	99481213	-	-0.999493	4.49934	-6.46127	2.0704e-06	4.34119e-05	4.8985
ENSMUSG00000030726.17	protein_coding	Pold3	2	OTTMUSG00000025292.1	chr7	HAVANA	gene	99731318	99770772	-	-0.962626	5.54003	-6.49046	1.94097e-06	4.15707e-05	4.89773
ENSMUSG00000021594.12	protein_coding	Srd5a1	2	OTTMUSG00000035506.1	chr13	HAVANA	gene	69721568	69759561	-	-1.65225	3.87952	-6.43645	2.18741e-06	4.50454e-05	4.89698
ENSMUSG00000004207.16	protein_coding	Psap	2	OTTMUSG00000016474.1	chr10	HAVANA	gene	60113449	60138376	+	0.812471	9.55064	6.51264	1.84818e-06	4.02973e-05	4.89655
ENSMUSG00000071856.11	protein_coding	Mcc	2	OTTMUSG00000055565.1	chr18	HAVANA	gene	44558127	44945249	-	1.47136	2.79608	6.37859	2.48721e-06	4.90707e-05	4.89626
ENSMUSG00000024098.7	protein_coding	Twsg1	2	OTTMUSG00000072510.1	chr17	HAVANA	gene	66228967	66258221	-	0.73777	7.12004	6.50919	1.86234e-06	4.03546e-05	4.89364
ENSMUSG00000043088.17	protein_coding	Il17re	2	OTTMUSG00000056372.1	chr6	HAVANA	gene	113435445	113447719	+	1.11868	4.4495	6.46862	2.037e-06	4.29885e-05	4.88886
ENSMUSG00000022476.9	protein_coding	Polr3h	2	OTTMUSG00000070912.1	chr15	HAVANA	gene	81772429	81810441	-	-1.34591	4.23205	-6.44034	2.16862e-06	4.49109e-05	4.88557
ENSMUSG00000078853.9	protein_coding	Igtp	2	OTTMUSG00000005727.1	chr11	HAVANA	gene	58090382	58098417	+	2.52093	0.101971	6.40682	2.336e-06	4.72477e-05	4.88055
ENSMUSG00000039221.11	protein_coding	Rpl22l1	2	OTTMUSG00000051223.1	chr3	HAVANA	gene	28859585	28861573	+	-1.13404	5.45994	-6.48265	1.97477e-06	4.21607e-05	4.87491
ENSMUSG00000030134.12	protein_coding	Rasgef1a	2	OTTMUSG00000056768.1	chr6	HAVANA	gene	117988399	118068507	+	2.52036	0.888718	6.37138	2.52742e-06	4.96217e-05	4.87412
ENSMUSG00000018446.9	protein_coding	C1qbp	2	OTTMUSG00000006079.1	chr11	HAVANA	gene	70868662	70873852	-	-1.63944	6.53768	-6.49077	1.93964e-06	4.15707e-05	4.86922
ENSMUSG00000038843.19	protein_coding	Gcnt1	2	OTTMUSG00000037187.1	chr19	HAVANA	gene	17303505	17350208	-	1.3691	7.26672	6.49672	1.91431e-06	4.13104e-05	4.86859
ENSMUSG00000036136.10	protein_coding	Fam110c	2	OTTMUSG00000065057.1	chr12	HAVANA	gene	31123860	31130250	+	-1.28357	4.31166	-6.42177	2.25978e-06	4.6178e-05	4.86178
ENSMUSG00000047910.7	protein_coding	Pcdhb16	2	OTTMUSG00000050742.1	chr18	HAVANA	gene	37610867	37616091	+	1.73771	2.86371	6.36785	2.54737e-06	4.98181e-05	4.85786
ENSMUSG00000028466.17	protein_coding	Creb3	2	OTTMUSG00000006960.1	chr4	HAVANA	gene	43562332	43567060	+	1.3647	5.84286	6.47682	2.00039e-06	4.25716e-05	4.85504
ENSMUSG00000032109.16	protein_coding	Nlrx1	2	OTTMUSG00000063221.1	chr9	HAVANA	gene	44164014	44179896	-	1.13031	2.26495	6.36195	2.58103e-06	5.03288e-05	4.85251
ENSMUSG00000023960.14	protein_coding	Enpp5	2	OTTMUSG00000028305.1	chr17	HAVANA	gene	44389704	44397458	+	1.47982	4.6726	6.45598	2.09479e-06	4.37895e-05	4.84975
ENSMUSG00000024222.19	protein_coding	Fkbp5	2	OTTMUSG00000024255.1	chr17	HAVANA	gene	28618068	28736501	-	-1.27054	5.41903	-6.45241	2.11143e-06	4.40453e-05	4.84817
ENSMUSG00000030232.20	protein_coding	Aebp2	2	OTTMUSG00000034195.1	chr6	HAVANA	gene	140546644	140713010	+	-0.660918	6.86961	-6.48344	1.97131e-06	4.21318e-05	4.84112
ENSMUSG00000022684.16	protein_coding	Bfar	2	OTTMUSG00000028685.1	chr16	HAVANA	gene	13489722	13521476	+	0.67333	5.73224	6.47214	2.02122e-06	4.29163e-05	4.83657
ENSMUSG00000038150.8	protein_coding	Ormdl3	2	OTTMUSG00000006371.1	chr11	HAVANA	gene	98472082	98478194	-	0.733114	4.98288	6.44809	2.13173e-06	4.43134e-05	4.83452
ENSMUSG00000073676.5	protein_coding	Hspe1	2	OTTMUSG00000021821.1	chr1	HAVANA	gene	55127291	55130466	+	-1.6837	5.70342	-6.45866	2.08237e-06	4.35754e-05	4.83118
ENSMUSG00000049775.17	protein_coding	Tmsb4x	2	OTTMUSG00000019572.1	chrX	HAVANA	gene	165990089	165992311	-	1.8613	9.66672	6.47792	1.99554e-06	4.25135e-05	4.82061
ENSMUSG00000031490.7	protein_coding	Eif4ebp1	2	OTTMUSG00000061031.1	chr8	HAVANA	gene	27750357	27766702	+	-1.49567	6.32932	-6.46811	2.0393e-06	4.29885e-05	4.82012
ENSMUSG00000021281.16	protein_coding	Tnfaip2	2	OTTMUSG00000016690.1	chr12	HAVANA	gene	111408903	111421452	+	-1.61959	7.32075	-6.47364	2.01452e-06	4.28267e-05	4.81682
ENSMUSG00000021079.17	protein_coding	Timm9	2	OTTMUSG00000065949.1	chr12	HAVANA	gene	71169947	71183458	-	-1.33091	4.27934	-6.40942	2.32256e-06	4.71515e-05	4.81317
ENSMUSG00000019564.13	protein_coding	Arid3a	2	OTTMUSG00000023712.1	chr10	HAVANA	gene	79762877	79790852	+	2.44748	1.86948	6.33306	2.75257e-06	5.28503e-05	4.80836
ENSMUSG00000019373.12	protein_coding	Cops3	2	OTTMUSG00000008091.1	chr11	HAVANA	gene	59708621	59730664	-	-0.694857	6.14132	-6.46083	2.07239e-06	4.34119e-05	4.80516
ENSMUSG00000056851.16	protein_coding	Pcbp2	2	OTTMUSG00000071249.1	chr15	HAVANA	gene	102378974	102408496	+	-0.742534	8.82388	-6.47122	2.0253e-06	4.29163e-05	4.8033
ENSMUSG00000026281.16	protein_coding	Dtymk	2	OTTMUSG00000022163.1	chr1	HAVANA	gene	93720298	93729656	-	-1.56711	5.59428	-6.44249	2.15832e-06	4.47901e-05	4.80273
ENSMUSG00000042985.8	protein_coding	Upk3b	2	OTTMUSG00000021768.1	chr5	HAVANA	gene	136067350	136075341	+	3.6406	-1.8863	6.60016	1.52434e-06	3.49273e-05	4.80215
ENSMUSG00000005968.15	protein_coding	Tuft1	2	OTTMUSG00000019566.1	chr3	HAVANA	gene	94520064	94566179	-	1.82305	5.87289	6.44779	2.13313e-06	4.43134e-05	4.79381
ENSMUSG00000040407.19	protein_coding	Akap9	2	OTTMUSG00000016263.1	chr5	HAVANA	gene	3978054	4131310	+	0.755357	7.48433	6.46461	2.05514e-06	4.3186e-05	4.79192
ENSMUSG00000061689.16	protein_coding	Dlgap4	1	OTTMUSG00000016033.1	chr2	HAVANA	gene	156455625	156606283	+	1.15209	6.09314	6.45394	2.10425e-06	4.39412e-05	4.79158
ENSMUSG00000040022.15	protein_coding	Rab11fip2	2	OTTMUSG00000036573.1	chr19	HAVANA	gene	59891316	59932086	-	0.698042	4.66712	6.42203	2.25849e-06	4.6178e-05	4.79075
ENSMUSG00000024962.14	protein_coding	Vegfb	2	OTTMUSG00000033015.1	chr19	HAVANA	gene	6959841	6965019	-	-0.789129	5.66156	-6.44814	2.13146e-06	4.43134e-05	4.78724
ENSMUSG00000023330.13	protein_coding	Dtwd1	2	OTTMUSG00000015336.1	chr2	HAVANA	gene	125994061	126007199	+	-1.1279	3.35908	-6.35279	2.63422e-06	5.12663e-05	4.78181
ENSMUSG00000002210.12	protein_coding	Smg9	2	OTTMUSG00000022275.1	chr7	HAVANA	gene	24099044	24122203	+	-1.00387	4.77213	-6.41372	2.3005e-06	4.68188e-05	4.77556
ENSMUSG00000042389.14	protein_coding	Tsen2	2	OTTMUSG00000023781.1	chr6	HAVANA	gene	115521625	115555589	+	-1.19846	4.08947	-6.37883	2.48589e-06	4.90707e-05	4.77089
ENSMUSG00000042660.9	protein_coding	Wdr55	2	OTTMUSG00000073397.1	chr18	HAVANA	gene	36893273	36896863	+	-1.30876	4.45874	-6.39434	2.40167e-06	4.81441e-05	4.76991
ENSMUSG00000038037.6	protein_coding	Socs1	2	OTTMUSG00000071213.1	chr16	HAVANA	gene	10600104	10603400	-	-3.33104	0.450571	-6.38304	2.46275e-06	4.88308e-05	4.76793
ENSMUSG00000026127.14	protein_coding	Imp4	2	OTTMUSG00000029577.1	chr1	HAVANA	gene	34478932	34488437	+	-0.808682	5.70449	-6.43574	2.19086e-06	4.50454e-05	4.76513
ENSMUSG00000071644.11	protein_coding	Eef1g	2	OTTMUSG00000020426.1	chr19	HAVANA	gene	8944405	8955843	+	-1.13818	9.16169	-6.45028	2.12141e-06	4.42074e-05	4.75712
ENSMUSG00000006494.12	protein_coding	Pdk1	2	OTTMUSG00000013264.1	chr2	HAVANA	gene	71703568	71734202	+	-1.13223	6.05632	-6.43702	2.18464e-06	4.50454e-05	4.75671
ENSMUSG00000027203.16	protein_coding	Dut	2	OTTMUSG00000015344.1	chr2	HAVANA	gene	125089110	125100528	+	-1.47057	6.29532	-6.43657	2.18683e-06	4.50454e-05	4.75541
ENSMUSG00000098055.4	lncRNA	Gm26947	2	OTTMUSG00000043407.1	chr10	HAVANA	gene	60721215	60787423	+	-1.72196	0.720637	-6.32764	2.78604e-06	5.34417e-05	4.75235
ENSMUSG00000042207.18	protein_coding	Kdm5b	1	OTTMUSG00000017092.1	chr1	HAVANA	gene	134487909	134563023	+	1.21991	6.43345	6.4389	2.17555e-06	4.50079e-05	4.74856
ENSMUSG00000024151.14	protein_coding	Msh2	2	OTTMUSG00000038134.1	chr17	HAVANA	gene	87979758	88031141	+	-0.972715	6.50961	-6.43607	2.18924e-06	4.50454e-05	4.74173
ENSMUSG00000021747.13	protein_coding	Cfap20dc	2	OTTMUSG00000015260.1	chr14	HAVANA	gene	13803533	14038581	+	-1.07715	3.4669	-6.34184	2.69924e-06	5.22661e-05	4.73727
ENSMUSG00000026575.16	protein_coding	Nme7	2	OTTMUSG00000050838.1	chr1	HAVANA	gene	164131690	164265294	+	-0.725538	4.1252	-6.37376	2.51409e-06	4.94084e-05	4.72763
ENSMUSG00000018820.14	protein_coding	Zfyve27	2	OTTMUSG00000035213.1	chr19	HAVANA	gene	42152390	42183029	+	0.840841	6.93585	6.4337	2.20075e-06	4.52024e-05	4.72696
ENSMUSG00000103116.3	lncRNA	4930539M17Rik	2	OTTMUSG00000051401.1	chr3	HAVANA	gene	9126985	9138452	+	4.78389	-3.67451	7.79689	1.21059e-07	5.5604e-06	4.72316
ENSMUSG00000037366.15	protein_coding	Pafah2	2	OTTMUSG00000010831.1	chr4	HAVANA	gene	134123631	134154724	+	1.09586	5.19423	6.4058	2.34129e-06	4.72477e-05	4.72301
ENSMUSG00000029070.10	protein_coding	Mxra8	2	OTTMUSG00000010893.1	chr4	HAVANA	gene	155924137	155928545	+	1.71333	5.36378	6.40893	2.32507e-06	4.71515e-05	4.72041
ENSMUSG00000027312.15	protein_coding	Atrn	2	OTTMUSG00000015539.1	chr2	HAVANA	gene	130748415	130872253	+	0.737502	6.6185	6.42613	2.23802e-06	4.58737e-05	4.71534
ENSMUSG00000039007.11	protein_coding	Cpq	2	OTTMUSG00000070215.1	chr15	HAVANA	gene	33083275	33594698	+	2.13884	2.17566	6.28738	3.04804e-06	5.74765e-05	4.71335
ENSMUSG00000024037.14	protein_coding	Wdr4	2	OTTMUSG00000035223.1	chr17	HAVANA	gene	31713296	31738954	-	-0.888611	4.99104	-6.39299	2.4089e-06	4.82406e-05	4.71113
ENSMUSG00000057262.3	processed_pseudogene	Rpl15-ps6	2	OTTMUSG00000070405.1	chr15	HAVANA	gene	52341013	52341624	-	-1.24974	2.4003	-6.2999	2.96401e-06	5.62629e-05	4.70875
ENSMUSG00000007570.17	protein_coding	Fance	2	OTTMUSG00000023386.1	chr17	HAVANA	gene	28532493	28545546	+	-0.80746	4.39304	-6.36968	2.53699e-06	4.97121e-05	4.70868
ENSMUSG00000029642.12	protein_coding	Polr1d	2	OTTMUSG00000024630.1	chr5	HAVANA	gene	147013860	147048407	+	-0.947739	5.61835	-6.40551	2.3428e-06	4.72477e-05	4.7016
ENSMUSG00000057134.8	protein_coding	Ado	2	OTTMUSG00000064406.1	chr10	HAVANA	gene	67380341	67384898	-	-0.804159	5.13625	-6.39235	2.41229e-06	4.82602e-05	4.7001
ENSMUSG00000058070.15	protein_coding	Eml1	2	OTTMUSG00000024650.1	chr12	HAVANA	gene	108337216	108505876	+	-0.816996	6.29577	-6.41288	2.30477e-06	4.68582e-05	4.69554
ENSMUSG00000007891.17	protein_coding	Ctsd	2	OTTMUSG00000060153.1	chr7	HAVANA	gene	141929648	141941775	-	1.11597	9.04652	6.4195	2.2712e-06	4.63641e-05	4.6885
ENSMUSG00000001123.16	protein_coding	Lgals9	2	OTTMUSG00000000163.1	chr11	HAVANA	gene	78853800	78875772	-	1.29542	6.06888	6.40611	2.33968e-06	4.72477e-05	4.68705
ENSMUSG00000090733.7	protein_coding	Rps27	2	OTTMUSG00000052891.1	chr3	HAVANA	gene	90119829	90120958	-	-1.09454	7.30602	-6.41597	2.28903e-06	4.66803e-05	4.68504
ENSMUSG00000000544.15	protein_coding	Gpa33	2	OTTMUSG00000016903.1	chr1	HAVANA	gene	165957807	165994079	+	1.10465	7.00459	6.4139	2.29958e-06	4.68188e-05	4.6805
ENSMUSG00000102758.4	protein_coding	Naaladl2	2	OTTMUSG00000051138.1	chr3	HAVANA	gene	23852266	25198425	-	1.95154	1.02804	6.27363	3.14324e-06	5.86094e-05	4.67748
ENSMUSG00000047044.8	protein_coding	D030056L22Rik	2	OTTMUSG00000073885.1	chr19	HAVANA	gene	18690557	18695792	+	-1.44091	5.11572	-6.37432	2.51093e-06	4.93949e-05	4.66977
ENSMUSG00000028955.4	protein_coding	Vamp3	2	OTTMUSG00000010239.1	chr4	HAVANA	gene	151131757	151142420	-	-0.872121	5.36321	-6.38735	2.43924e-06	4.87355e-05	4.66941
ENSMUSG00000056209.8	protein_coding	Npm3	2	OTTMUSG00000022715.1	chr19	HAVANA	gene	45736173	45738030	-	-1.78858	5.02338	-6.36652	2.55489e-06	4.99164e-05	4.66909
ENSMUSG00000042628.9	protein_coding	Zfyve1	2	OTTMUSG00000066780.1	chr12	HAVANA	gene	83593332	83643996	-	1.50229	5.46683	6.38442	2.45518e-06	4.87772e-05	4.66538
ENSMUSG00000066232.5	protein_coding	Ipo7	2	OTTMUSG00000060142.1	chr7	HAVANA	gene	109617481	109655816	+	-1.26462	8.35478	-6.4087	2.32626e-06	4.71515e-05	4.66472
ENSMUSG00000020402.12	protein_coding	Vdac1	2	OTTMUSG00000005626.1	chr11	HAVANA	gene	52251687	52280224	+	-0.743744	7.78883	-6.40804	2.32967e-06	4.71728e-05	4.66444
ENSMUSG00000024258.5	protein_coding	Polr2d	2	OTTMUSG00000073153.1	chr18	HAVANA	gene	31922212	31929754	+	-1.22301	4.23267	-6.33898	2.71653e-06	5.23593e-05	4.65982
ENSMUSG00000031918.17	protein_coding	Mtmr2	2	OTTMUSG00000032802.1	chr9	HAVANA	gene	13659706	13717777	+	-0.713839	6.24516	-6.3953	2.39655e-06	4.80895e-05	4.65648
ENSMUSG00000020432.13	protein_coding	Tcn2	2	OTTMUSG00000005043.1	chr11	HAVANA	gene	3867192	3882159	-	2.95711	4.47415	6.33652	2.73142e-06	5.25451e-05	4.65625
ENSMUSG00000032966.15	protein_coding	Fkbp1a	2	OTTMUSG00000015867.1	chr2	HAVANA	gene	151384403	151403612	+	-0.948042	8.54756	-6.40372	2.35214e-06	4.73883e-05	4.6529
ENSMUSG00000062115.16	protein_coding	Rai1	2	OTTMUSG00000005811.1	chr11	HAVANA	gene	59995839	60090023	+	0.871979	7.49346	6.39749	2.38493e-06	4.79067e-05	4.64239
ENSMUSG00000031214.14	protein_coding	Ophn1	2	OTTMUSG00000018075.1	chrX	HAVANA	gene	97597883	97934631	-	0.995003	4.15522	6.33754	2.72522e-06	5.24762e-05	4.64211
ENSMUSG00000026235.15	protein_coding	Epha4	2	OTTMUSG00000047778.1	chr1	HAVANA	gene	77343822	77491725	-	1.42586	6.4779	6.38369	2.45916e-06	4.88078e-05	4.6259
ENSMUSG00000022346.18	protein_coding	Myc	2	OTTMUSG00000034892.1	chr15	HAVANA	gene	61857240	61862223	+	-1.73642	6.8807	-6.38469	2.45373e-06	4.87772e-05	4.62491
ENSMUSG00000021342.15	protein_coding	Prl	2	OTTMUSG00000000731.1	chr13	HAVANA	gene	27241553	27249188	+	-1.38465	6.8316	-6.38622	2.44539e-06	4.87762e-05	4.623
ENSMUSG00000058997.9	protein_coding	Vwa8	2	OTTMUSG00000069246.1	chr14	HAVANA	gene	79086492	79439750	+	0.667532	6.32103	6.38137	2.47192e-06	4.89641e-05	4.62109
ENSMUSG00000028214.14	protein_coding	Gem	2	OTTMUSG00000004518.1	chr4	HAVANA	gene	11704457	11714752	+	-1.30233	4.31975	-6.30427	2.93517e-06	5.58213e-05	4.62029
ENSMUSG00000034708.13	protein_coding	Grn	2	OTTMUSG00000002816.1	chr11	HAVANA	gene	102321141	102327874	+	1.03078	7.57559	6.38538	2.44999e-06	4.87772e-05	4.61366
ENSMUSG00000025321.15	protein_coding	Itgb8	2	OTTMUSG00000026449.1	chr12	HAVANA	gene	119121757	119202537	-	5.10587	-1.65981	6.74383	1.11344e-06	2.75962e-05	4.60948
ENSMUSG00000016319.4	protein_coding	Slc25a5	2	OTTMUSG00000016520.1	chrX	HAVANA	gene	36059304	36062460	+	-1.40603	7.73526	-6.38025	2.47804e-06	4.90367e-05	4.60411
ENSMUSG00000021595.19	protein_coding	Nsun2	1	OTTMUSG00000024575.1	chr13	HAVANA	gene	69681865	69783899	+	-1.34574	7.40011	-6.37817	2.48956e-06	4.90707e-05	4.60212
ENSMUSG00000078193.3	protein_coding	Rpl35rt	2	OTTMUSG00000046249.1	chr1	HAVANA	gene	156193610	156194054	+	-1.36751	2.31323	-6.24197	3.37413e-06	6.21051e-05	4.6016
ENSMUSG00000023944.15	protein_coding	Hsp90ab1	2	OTTMUSG00000020123.1	chr17	HAVANA	gene	45878701	45884197	-	-0.865913	11.3934	-6.37588	2.50227e-06	4.92728e-05	4.60154
ENSMUSG00000103509.2	TEC	Gm38372	2	OTTMUSG00000043377.1	chr1	HAVANA	gene	7218334	7222361	+	1.81617	2.18527	6.24003	3.3888e-06	6.23178e-05	4.60065
ENSMUSG00000028639.15	protein_coding	Ybx1	2	OTTMUSG00000009259.1	chr4	HAVANA	gene	119135178	119151801	-	-1.34751	9.41949	-6.37936	2.48297e-06	4.90707e-05	4.59908
ENSMUSG00000031848.16	protein_coding	Lsm4	2	OTTMUSG00000029897.1	chr8	HAVANA	gene	71125898	71131402	+	-1.18962	5.76053	-6.35739	2.60733e-06	5.07923e-05	4.58967
ENSMUSG00000031256.12	protein_coding	Cstf2	2	OTTMUSG00000019011.1	chrX	HAVANA	gene	132959936	132987568	+	-1.09136	6.2379	-6.36264	2.57709e-06	5.0301e-05	4.58923
ENSMUSG00000008690.16	protein_coding	Ncaph2	2	OTTMUSG00000024517.1	chr15	HAVANA	gene	89239922	89257029	+	-0.910422	7.67999	-6.37026	2.53373e-06	4.96968e-05	4.58107
ENSMUSG00000139144.1	lncRNA	ENSMUSG00000139144	2	NA	chr6	HAVANA	gene	124774105	124783106	-	-2.46185	1.61165	-6.22698	3.48943e-06	6.36422e-05	4.5794
ENSMUSG00000021706.15	protein_coding	Zfyve16	2	OTTMUSG00000024652.1	chr13	HAVANA	gene	92623616	92667376	-	0.580398	5.43935	6.33919	2.71524e-06	5.23593e-05	4.55778
ENSMUSG00000035638.15	protein_coding	Muc20	1	OTTMUSG00000025214.1	chr16	HAVANA	gene	32597793	32617805	-	2.35852	4.21733	6.31	2.89791e-06	5.527e-05	4.55671
ENSMUSG00000030042.16	protein_coding	Pole4	2	OTTMUSG00000023086.1	chr6	HAVANA	gene	82595973	82682346	-	-1.35191	4.37992	-6.28996	3.03056e-06	5.72547e-05	4.55102
ENSMUSG00000007833.16	protein_coding	Aldh16a1	1	OTTMUSG00000023570.1	chr7	HAVANA	gene	44790108	44804008	-	-0.797907	5.17726	-6.32297	2.81522e-06	5.38984e-05	4.54166
ENSMUSG00000029111.8	protein_coding	Nelfa	2	OTTMUSG00000025105.1	chr5	HAVANA	gene	34055260	34093757	-	-0.809843	4.80976	-6.30941	2.9017e-06	5.52897e-05	4.54057
ENSMUSG00000021731.11	protein_coding	Mrps30	2	OTTMUSG00000032637.1	chr13	HAVANA	gene	118514917	118523788	-	-0.879919	5.21843	-6.32186	2.82222e-06	5.39807e-05	4.53856
ENSMUSG00000038267.16	protein_coding	Slc22a23	2	OTTMUSG00000033842.1	chr13	HAVANA	gene	34363141	34529165	-	0.88282	7.73926	6.34836	2.66032e-06	5.17239e-05	4.5317
ENSMUSG00000075520.6	protein_coding	Malrd1	1	OTTMUSG00000051125.1	chr2	HAVANA	gene	15531290	16260366	+	2.53298	1.08817	6.20374	3.6762e-06	6.60265e-05	4.53098
ENSMUSG00000028673.11	protein_coding	Fuca1	2	OTTMUSG00000009850.1	chr4	HAVANA	gene	135648046	135667622	+	0.74804	6.50827	6.34061	2.70664e-06	5.23196e-05	4.52584
ENSMUSG00000114003.2	processed_pseudogene	Gm9616	2	OTTMUSG00000066237.1	chr13	HAVANA	gene	3348887	3349667	+	-1.7007	1.15509	-6.20277	3.68419e-06	6.61107e-05	4.52381
ENSMUSG00000029304.15	protein_coding	Spp1	2	OTTMUSG00000024389.1	chr5	HAVANA	gene	104582984	104588916	+	-2.23697	9.44065	-6.34429	2.68454e-06	5.20936e-05	4.52226
ENSMUSG00000034616.18	protein_coding	Ssh3	2	OTTMUSG00000074020.1	chr19	HAVANA	gene	4311696	4319208	-	0.77751	6.69188	6.3393	2.71458e-06	5.23593e-05	4.52032
ENSMUSG00000007836.7	protein_coding	Hnrnpa0	2	OTTMUSG00000068410.1	chr13	HAVANA	gene	58273693	58276370	-	-1.05752	7.85715	-6.34171	2.70004e-06	5.22661e-05	4.51615
ENSMUSG00000041453.13	protein_coding	Rpl21	2	OTTMUSG00000024591.1	chr5	HAVANA	gene	146769700	146773842	+	-1.12398	8.04708	-6.34151	2.70126e-06	5.22661e-05	4.5148
ENSMUSG00000078153.4	protein_coding	Psme2b	2	OTTMUSG00000005530.1	chr11	HAVANA	gene	48836181	48837017	-	1.7209	1.1939	6.1871	3.81616e-06	6.74513e-05	4.4965
ENSMUSG00000033099.11	protein_coding	Nol12	2	OTTMUSG00000033929.1	chr15	HAVANA	gene	78819133	78827838	+	-1.07843	4.67487	-6.28046	3.09556e-06	5.8205e-05	4.49463
ENSMUSG00000028066.16	protein_coding	Pmf1	1	OTTMUSG00000052145.1	chr3	HAVANA	gene	88301450	88317638	-	-1.85769	5.19404	-6.28793	3.04431e-06	5.74603e-05	4.49197
ENSMUSG00000035165.15	protein_coding	Kcne3	2	OTTMUSG00000059142.1	chr7	HAVANA	gene	99825709	99834076	+	-2.11983	0.992992	-6.19578	3.74249e-06	6.65605e-05	4.48351
ENSMUSG00000020277.11	protein_coding	Pfkl	2	OTTMUSG00000016976.1	chr10	HAVANA	gene	77822781	77845917	-	-0.609574	7.9383	-6.3249	2.80314e-06	5.37183e-05	4.47721
ENSMUSG00000087187.4	lncRNA	Gm13431	2	OTTMUSG00000012144.1	chr2	HAVANA	gene	36105621	36120410	+	2.83743	1.43556	6.17498	3.92157e-06	6.88285e-05	4.47362
ENSMUSG00000069020.10	protein_coding	Urm1	2	OTTMUSG00000012687.1	chr2	HAVANA	gene	29710087	29735014	+	-0.800684	4.73944	-6.27923	3.10411e-06	5.8205e-05	4.47251
ENSMUSG00000052087.15	protein_coding	Rgs14	2	OTTMUSG00000033508.1	chr13	HAVANA	gene	55517545	55532500	+	-3.61609	0.339815	-6.27541	3.13074e-06	5.854e-05	4.47218
ENSMUSG00000020964.16	protein_coding	Sel1l	2	OTTMUSG00000035560.1	chr12	HAVANA	gene	91772817	91815931	-	0.685744	7.47999	6.31896	2.84053e-06	5.42272e-05	4.46605
ENSMUSG00000036371.7	protein_coding	Serbp1	2	OTTMUSG00000057415.1	chr6	HAVANA	gene	67215160	67274720	+	-1.13289	9.19264	-6.31981	2.83514e-06	5.4176e-05	4.46501
ENSMUSG00000004233.15	protein_coding	Wars2	2	OTTMUSG00000006862.1	chr3	HAVANA	gene	99048384	99146502	+	-0.787554	4.50447	-6.27181	3.15606e-06	5.87938e-05	4.46478
ENSMUSG00000027624.21	protein_coding	Epb41l1	2	OTTMUSG00000015876.1	chr2	HAVANA	gene	156262829	156385134	+	1.20122	5.95193	6.30656	2.92025e-06	5.55902e-05	4.45812
ENSMUSG00000045896.15	protein_coding	Paip2b	2	OTTMUSG00000023448.1	chr6	HAVANA	gene	83782383	83808723	-	-0.992928	5.51442	-6.29157	3.01966e-06	5.71026e-05	4.45185
ENSMUSG00000000159.17	protein_coding	Igsf5	2	OTTMUSG00000020392.1	chr16	HAVANA	gene	96162868	96223321	+	0.985379	3.80299	6.23803	3.40402e-06	6.24257e-05	4.4509
ENSMUSG00000042111.10	protein_coding	Ccdc115	2	OTTMUSG00000049472.1	chr1	HAVANA	gene	34475751	34478753	-	-1.09284	3.20457	-6.19731	3.72963e-06	6.64497e-05	4.44743
ENSMUSG00000024401.15	protein_coding	Tnf	2	OTTMUSG00000037196.1	chr17	HAVANA	gene	35418357	35420983	-	4.51841	-1.81684	6.79837	9.88982e-07	2.5003e-05	4.44056
ENSMUSG00000022881.16	protein_coding	Rfc4	2	OTTMUSG00000025290.1	chr16	HAVANA	gene	22932693	22946487	-	-2.05475	4.25949	-6.23331	3.44023e-06	6.29647e-05	4.43854
ENSMUSG00000074665.12	protein_coding	Bpifb4	2	OTTMUSG00000016848.1	chr2	HAVANA	gene	153780141	153806021	+	-3.52086	0.348165	-6.24284	3.36756e-06	6.20412e-05	4.43711
ENSMUSG00000039770.7	protein_coding	Ypel5	2	OTTMUSG00000072309.1	chr17	HAVANA	gene	73143448	73158190	+	1.49862	5.21716	6.27397	3.14087e-06	5.86094e-05	4.43665
ENSMUSG00000024566.11	protein_coding	Atp9b	2	OTTMUSG00000068418.1	chr18	HAVANA	gene	80777356	80977275	-	0.635434	6.56482	6.2989	2.97064e-06	5.63354e-05	4.431
ENSMUSG00000034211.15	protein_coding	Mrps17	2	OTTMUSG00000027648.1	chr5	HAVANA	gene	129792561	129799620	+	-0.631021	5.36234	-6.27985	3.09979e-06	5.8205e-05	4.43077
ENSMUSG00000020656.17	protein_coding	Grhl1	2	OTTMUSG00000066888.1	chr12	HAVANA	gene	24622282	24667390	+	2.00498	2.55862	6.16647	3.99739e-06	6.99141e-05	4.42498
ENSMUSG00000021258.11	protein_coding	Ccnk	2	OTTMUSG00000066414.1	chr12	HAVANA	gene	108145838	108169618	+	-0.617688	5.6173	-6.28021	3.09734e-06	5.8205e-05	4.41999
ENSMUSG00000074886.12	protein_coding	Grk6	2	OTTMUSG00000068263.1	chr13	HAVANA	gene	55592885	55608740	+	-0.89527	6.18335	-6.2825	3.08149e-06	5.80526e-05	4.4093
ENSMUSG00000057530.15	protein_coding	Ece1	2	OTTMUSG00000009809.1	chr4	HAVANA	gene	137589548	137692540	+	0.888497	7.33996	6.29166	3.01909e-06	5.71026e-05	4.40563
ENSMUSG00000028618.12	protein_coding	Tmem59	1	OTTMUSG00000008472.1	chr4	HAVANA	gene	107035596	107058193	+	0.882501	7.81928	6.29234	3.01448e-06	5.71026e-05	4.40403
ENSMUSG00000000957.12	protein_coding	Mmp14	2	OTTMUSG00000053900.1	chr14	HAVANA	gene	54669069	54682821	+	1.19157	5.85518	6.26423	3.21006e-06	5.96333e-05	4.4003
ENSMUSG00000018387.13	protein_coding	Shroom1	2	OTTMUSG00000005639.1	chr11	HAVANA	gene	53348032	53358593	+	0.826204	3.4635	6.20168	3.69319e-06	6.62129e-05	4.39958
ENSMUSG00000028010.17	protein_coding	Gar1	2	OTTMUSG00000028857.1	chr3	HAVANA	gene	129618561	129625045	-	-1.75634	4.86015	-6.23184	3.45154e-06	6.30662e-05	4.38708
ENSMUSG00000028907.8	protein_coding	Utp11	2	OTTMUSG00000009171.1	chr4	HAVANA	gene	124571953	124587393	-	-0.751225	5.42613	-6.25849	3.25154e-06	6.03262e-05	4.38698
ENSMUSG00000022221.15	protein_coding	Ripk3	2	OTTMUSG00000069733.1	chr14	HAVANA	gene	56022452	56026322	-	-1.61123	2.69866	-6.1565	4.08807e-06	7.10658e-05	4.38571
ENSMUSG00000020829.10	protein_coding	Slc46a1	2	OTTMUSG00000000134.1	chr11	HAVANA	gene	78356523	78362885	+	1.21018	3.43242	6.18903	3.79968e-06	6.72789e-05	4.37898
ENSMUSG00000051339.11	protein_coding	2900026A02Rik	2	OTTMUSG00000025834.1	chr5	HAVANA	gene	113234189	113369102	-	0.814915	7.78205	6.27871	3.10774e-06	5.82184e-05	4.37363
ENSMUSG00000037286.16	protein_coding	Stag1	2	OTTMUSG00000034031.1	chr9	HAVANA	gene	100479851	100841428	+	-0.754014	6.28174	-6.269	3.17595e-06	5.91092e-05	4.37205
ENSMUSG00000041849.8	protein_coding	Card6	2	OTTMUSG00000029909.1	chr15	HAVANA	gene	5125463	5138021	-	-0.939259	4.85579	-6.23297	3.44284e-06	6.29647e-05	4.36958
ENSMUSG00000042035.12	protein_coding	Igsf3	2	OTTMUSG00000052209.1	chr3	HAVANA	gene	101284399	101370375	+	0.948645	5.57739	6.25824	3.25339e-06	6.03262e-05	4.36838
ENSMUSG00000019817.19	protein_coding	Plagl1	2	OTTMUSG00000031215.1	chr10	HAVANA	gene	12936248	13007438	+	4.27509	2.95973	6.13601	4.28114e-06	7.40919e-05	4.36717
ENSMUSG00000026879.15	protein_coding	Gsn	2	OTTMUSG00000012088.1	chr2	HAVANA	gene	35146392	35197904	+	1.26039	8.14484	6.27611	3.12584e-06	5.85029e-05	4.36683
ENSMUSG00000027878.12	protein_coding	Notch2	2	OTTMUSG00000053240.1	chr3	HAVANA	gene	97920843	98057677	+	0.854159	7.59869	6.27426	3.13881e-06	5.86094e-05	4.36476
ENSMUSG00000031549.17	protein_coding	Ido2	2	OTTMUSG00000029868.1	chr8	HAVANA	gene	25021908	25066349	-	-4.03076	-0.653426	-6.46602	2.04874e-06	4.30966e-05	4.3639
ENSMUSG00000024754.14	protein_coding	Cemip2	2	OTTMUSG00000073833.1	chr19	HAVANA	gene	21755706	21835724	+	0.901286	7.27746	6.26671	3.19228e-06	5.93581e-05	4.34933
ENSMUSG00000031600.12	protein_coding	Vps37a	2	OTTMUSG00000074659.1	chr8	HAVANA	gene	40964824	41003798	+	0.753945	6.04108	6.25438	3.28157e-06	6.06803e-05	4.34654
ENSMUSG00000026604.18	protein_coding	Ptpn14	2	OTTMUSG00000022087.1	chr1	HAVANA	gene	189460465	189608892	+	1.28138	5.9379	6.25675	3.26425e-06	6.04717e-05	4.34497
ENSMUSG00000038593.19	protein_coding	Tctn1	2	OTTMUSG00000022563.1	chr5	HAVANA	gene	122375911	122402523	-	0.919903	5.2889	6.23895	3.397e-06	6.24114e-05	4.33584
ENSMUSG00000022848.9	protein_coding	Slc49a4	2	OTTMUSG00000030298.1	chr16	HAVANA	gene	35514432	35589726	-	0.801082	5.48033	6.24425	3.35689e-06	6.19016e-05	4.33349
ENSMUSG00000066415.5	protein_coding	Msl2	1	OTTMUSG00000048624.1	chr9	HAVANA	gene	100956154	100981999	+	-0.571259	5.71966	-6.2382	3.4027e-06	6.24257e-05	4.3219
ENSMUSG00000040725.14	protein_coding	Hnrnpul1	2	OTTMUSG00000058398.1	chr7	HAVANA	gene	25420590	25454182	-	-0.556304	8.26878	-6.25556	3.27292e-06	6.05763e-05	4.32051
ENSMUSG00000018678.15	protein_coding	Sp2	2	OTTMUSG00000001858.1	chr11	HAVANA	gene	96844167	96873785	-	-0.725246	4.47767	-6.19315	3.76468e-06	6.67181e-05	4.31395
ENSMUSG00000040771.15	protein_coding	Oard1	2	OTTMUSG00000072563.1	chr17	HAVANA	gene	48717042	48724294	+	-0.852417	4.63161	-6.20115	3.6976e-06	6.62327e-05	4.31345
ENSMUSG00000017176.18	protein_coding	Nt5c3b	2	OTTMUSG00000006268.1	chr11	HAVANA	gene	100313147	100332634	-	-0.899849	4.9762	-6.21471	3.58676e-06	6.49444e-05	4.31267
ENSMUSG00000027944.14	protein_coding	Hax1	2	OTTMUSG00000052886.1	chr3	HAVANA	gene	89902753	89906087	-	-0.699603	5.4113	-6.22657	3.4926e-06	6.36422e-05	4.31098
ENSMUSG00000029154.14	protein_coding	Cwh43	2	OTTMUSG00000024904.1	chr5	HAVANA	gene	73563418	73610778	+	-1.63621	4.67737	-6.20067	3.70165e-06	6.6246e-05	4.30873
ENSMUSG00000032855.7	protein_coding	Pkd1	2	OTTMUSG00000069446.1	chr17	HAVANA	gene	24768808	24815482	+	0.730567	7.12393	6.24643	3.34058e-06	6.16576e-05	4.30687
ENSMUSG00000046876.17	protein_coding	Atxn1	2	OTTMUSG00000067697.1	chr13	HAVANA	gene	45703231	46118484	-	1.56978	4.64203	6.19402	3.75734e-06	6.66469e-05	4.30466
ENSMUSG00000027067.17	protein_coding	Ssrp1	2	OTTMUSG00000013453.1	chr2	HAVANA	gene	84867578	84877453	+	-1.1477	8.11194	-6.24754	3.33229e-06	6.15613e-05	4.30366
ENSMUSG00000026019.16	protein_coding	Wdr12	2	OTTMUSG00000021598.1	chr1	HAVANA	gene	60108944	60137804	-	-1.71389	4.88789	-6.19768	3.72653e-06	6.64497e-05	4.29945
ENSMUSG00000034614.15	protein_coding	Pik3ip1	2	OTTMUSG00000000761.1	chr11	HAVANA	gene	3280401	3292971	+	2.01365	3.21741	6.14451	4.19999e-06	7.28216e-05	4.29434
ENSMUSG00000048992.10	protein_coding	Prss32	2	OTTMUSG00000028090.1	chr17	HAVANA	gene	24062829	24078753	+	2.56379	-0.822899	6.1804	3.87413e-06	6.81752e-05	4.29134
ENSMUSG00000045671.19	protein_coding	Spred2	2	OTTMUSG00000005219.1	chr11	HAVANA	gene	19874375	19974026	+	-1.96423	5.54566	-6.21162	3.61171e-06	6.5278e-05	4.2902
ENSMUSG00000014850.16	protein_coding	Msh3	1	OTTMUSG00000047254.1	chr13	HAVANA	gene	92348380	92491511	-	-1.34656	4.15808	-6.16598	4.00178e-06	6.99299e-05	4.28982
ENSMUSG00000106961.2	TEC	Gm43128	2	OTTMUSG00000056303.1	chr2	HAVANA	gene	35170402	35172022	+	1.89623	0.403009	6.10505	4.59074e-06	7.82418e-05	4.27605
ENSMUSG00000026510.11	protein_coding	Trp53bp2	2	OTTMUSG00000027043.1	chr1	HAVANA	gene	182236737	182289997	+	0.73067	6.11799	6.22424	3.5109e-06	6.38594e-05	4.27542
ENSMUSG00000068015.9	protein_coding	Lrch1	2	OTTMUSG00000069347.1	chr14	HAVANA	gene	74992115	75185316	-	0.906051	5.14661	6.20419	3.67244e-06	6.60183e-05	4.27101
ENSMUSG00000034024.9	protein_coding	Cct2	2	OTTMUSG00000064279.1	chr10	HAVANA	gene	116886906	116899719	-	-0.911501	8.58346	-6.23343	3.43931e-06	6.29647e-05	4.27033
ENSMUSG00000031807.11	protein_coding	Pgls	2	OTTMUSG00000033938.1	chr8	HAVANA	gene	72044820	72053736	+	-0.832721	5.57009	-6.21207	3.60811e-06	6.52718e-05	4.26858
ENSMUSG00000046610.16	protein_coding	Oacyl	2	OTTMUSG00000028243.1	chr18	HAVANA	gene	65831339	65884672	+	3.76047	-0.945302	6.30053	2.95979e-06	5.6236e-05	4.26853
ENSMUSG00000030357.11	protein_coding	Fkbp4	2	OTTMUSG00000024637.1	chr6	HAVANA	gene	128406698	128415640	-	-1.12899	8.12316	-6.22905	3.47326e-06	6.34053e-05	4.26173
ENSMUSG00000074578.17	lncRNA	Zfas1	2	OTTMUSG00000001137.1	chr2	HAVANA	gene	166903619	166907799	+	-1.5308	5.84346	-6.20925	3.63099e-06	6.54742e-05	4.26061
ENSMUSG00000090925.4	lncRNA	1810064F22Rik	2	OTTMUSG00000045935.1	chr9	HAVANA	gene	22100395	22125251	-	3.69187	-0.9493	6.21933	3.5498e-06	6.43916e-05	4.26021
ENSMUSG00000021948.18	protein_coding	Prkcd	2	OTTMUSG00000025129.1	chr14	HAVANA	gene	30317311	30348167	-	0.857073	6.8592	6.22505	3.5045e-06	6.3801e-05	4.2595
ENSMUSG00000037523.14	protein_coding	Mavs	1	OTTMUSG00000016041.1	chr2	HAVANA	gene	131075983	131089945	+	-0.60828	5.51251	-6.2049	3.66662e-06	6.59727e-05	4.25434
ENSMUSG00000020430.13	protein_coding	Pes1	2	OTTMUSG00000005041.1	chr11	HAVANA	gene	3913975	3930004	+	-0.971034	6.61994	-6.21968	3.54699e-06	6.43916e-05	4.25427
ENSMUSG00000022125.8	protein_coding	Cln5	2	OTTMUSG00000069882.1	chr14	HAVANA	gene	103307652	103315064	+	0.732682	5.21211	6.19995	3.70764e-06	6.6294e-05	4.252
ENSMUSG00000022426.7	protein_coding	Josd1	2	OTTMUSG00000070811.1	chr15	HAVANA	gene	79558452	79572120	-	-0.697851	5.83438	-6.20908	3.63237e-06	6.54742e-05	4.25062
ENSMUSG00000044712.16	protein_coding	Slc38a6	1	OTTMUSG00000032835.1	chr12	HAVANA	gene	73333553	73400823	+	0.875224	4.01127	6.1547	4.10467e-06	7.12924e-05	4.24991
ENSMUSG00000041975.18	protein_coding	Mettl8	2	OTTMUSG00000013143.1	chr2	HAVANA	gene	70794905	70885927	-	-0.667184	4.1948	-6.15696	4.08387e-06	7.10544e-05	4.24654
ENSMUSG00000029569.10	protein_coding	Tmem168	1	OTTMUSG00000023860.1	chr6	HAVANA	gene	13580686	13608099	-	0.591776	6.69907	6.21793	3.56096e-06	6.45356e-05	4.24474
ENSMUSG00000022234.16	protein_coding	Cct5	2	OTTMUSG00000030800.1	chr15	HAVANA	gene	31590946	31601950	-	-1.11796	8.47368	-6.22055	3.54009e-06	6.43319e-05	4.2416
ENSMUSG00000061838.8	protein_coding	Suclg2	2	OTTMUSG00000057813.1	chr6	HAVANA	gene	95449990	95695781	-	-0.858972	6.14756	-6.20707	3.64883e-06	6.57118e-05	4.23632
ENSMUSG00000033389.17	protein_coding	Arhgap44	2	OTTMUSG00000005898.1	chr11	HAVANA	gene	64892865	65053787	-	2.14425	1.42584	6.06542	5.02076e-06	8.35791e-05	4.23222
ENSMUSG00000029191.17	protein_coding	Rfc1	1	OTTMUSG00000038036.1	chr5	HAVANA	gene	65419193	65493013	-	-0.811452	6.73767	-6.21032	3.62225e-06	6.54096e-05	4.23207
ENSMUSG00000019854.18	protein_coding	Reps1	2	OTTMUSG00000033574.1	chr10	HAVANA	gene	17931609	18000903	+	-0.621727	5.61369	-6.19535	3.74614e-06	6.65663e-05	4.22555
ENSMUSG00000029092.12	lncRNA	D5Ertd615e	2	OTTMUSG00000053866.1	chr5	HAVANA	gene	45166513	45581744	-	-4.56127	-1.24938	-6.50879	1.86398e-06	4.03546e-05	4.2175
ENSMUSG00000004748.6	protein_coding	Mtfp1	2	OTTMUSG00000005047.1	chr11	HAVANA	gene	4041480	4045445	-	-1.56991	1.50658	-6.05395	5.1528e-06	8.54929e-05	4.21355
ENSMUSG00000031021.14	protein_coding	Tmem9b	2	OTTMUSG00000027355.1	chr7	HAVANA	gene	109335041	109352082	-	0.81278	5.50806	6.18649	3.82143e-06	6.74849e-05	4.21065
ENSMUSG00000029388.15	protein_coding	Eif2b1	2	OTTMUSG00000024473.1	chr5	HAVANA	gene	124708276	124717194	-	-0.943408	4.89915	-6.16202	4.03757e-06	7.0474e-05	4.20583
ENSMUSG00000048581.13	protein_coding	E130311K13Rik	2	OTTMUSG00000034984.1	chr3	HAVANA	gene	63822105	63836893	-	1.03379	2.78177	6.07925	4.86626e-06	8.18235e-05	4.20519
ENSMUSG00000067629.14	protein_coding	Syngap1	2	OTTMUSG00000049838.1	chr17	HAVANA	gene	27160227	27191408	+	1.51497	3.22183	6.10167	4.62595e-06	7.8708e-05	4.20336
ENSMUSG00000028394.10	protein_coding	Pole3	2	OTTMUSG00000009021.1	chr4	HAVANA	gene	62440886	62443305	-	-1.29295	5.26151	-6.1708	3.95868e-06	6.93583e-05	4.20197
ENSMUSG00000075229.12	protein_coding	Mix23	2	OTTMUSG00000071901.1	chr16	HAVANA	gene	35892055	35912490	+	-0.855229	4.71181	-6.15889	4.06611e-06	7.08685e-05	4.20118
ENSMUSG00000031902.11	protein_coding	Nfatc3	2	OTTMUSG00000061942.1	chr8	HAVANA	gene	106785472	106857169	+	-0.61896	6.40944	-6.19437	3.75434e-06	6.66469e-05	4.20025
ENSMUSG00000032656.15	protein_coding	Marchf3	2	OTTMUSG00000016638.1	chr18	HAVANA	gene	56894788	57058620	-	3.01169	1.22878	6.05051	5.19301e-06	8.60176e-05	4.19901
ENSMUSG00000096740.9	protein_coding	Lbhd1	1	OTTMUSG00000045560.1	chr19	HAVANA	gene	8861096	8869991	+	-1.40687	3.07973	-6.08452	4.80858e-06	8.1126e-05	4.19664
ENSMUSG00000018899.18	protein_coding	Irf1	2	OTTMUSG00000005648.1	chr11	HAVANA	gene	53660841	53669200	+	0.833729	4.68476	6.15743	4.07953e-06	7.10407e-05	4.1963
ENSMUSG00000034807.10	protein_coding	Colgalt1	2	OTTMUSG00000062165.1	chr8	HAVANA	gene	72063642	72077555	+	0.986417	8.15393	6.19907	3.7149e-06	6.63644e-05	4.19351
ENSMUSG00000039219.19	protein_coding	Arid4b	2	OTTMUSG00000018144.1	chr13	HAVANA	gene	14237817	14374188	+	0.812342	6.32037	6.18853	3.80396e-06	6.72952e-05	4.18941
ENSMUSG00000019889.11	protein_coding	Ptprk	2	OTTMUSG00000064695.1	chr10	HAVANA	gene	27950816	28473393	+	1.02575	7.98756	6.19733	3.7295e-06	6.64497e-05	4.18935
ENSMUSG00000089671.3	lncRNA	Gm16537	2	OTTMUSG00000034996.1	chr15	HAVANA	gene	99613048	99624226	-	2.29412	0.476477	6.07421	4.92201e-06	8.25825e-05	4.18929
ENSMUSG00000039660.17	protein_coding	Spout1	2	OTTMUSG00000016747.1	chr2	HAVANA	gene	30063465	30068471	-	-1.15579	4.46397	-6.13392	4.30135e-06	7.43217e-05	4.18872
ENSMUSG00000029863.14	protein_coding	Casp2	2	OTTMUSG00000023653.1	chr6	HAVANA	gene	42241919	42259442	+	-0.686538	5.86569	-6.18042	3.87391e-06	6.81752e-05	4.18868
ENSMUSG00000026764.16	protein_coding	Kif5c	2	OTTMUSG00000012481.1	chr2	HAVANA	gene	49509310	49664790	+	-1.35026	4.48096	-6.12336	4.40495e-06	7.56548e-05	4.18544
ENSMUSG00000110276.3	lncRNA	Gm45330	2	OTTMUSG00000061452.1	chr17	HAVANA	gene	49015628	49045935	-	-2.5094	0.913245	-6.04695	5.23507e-06	8.64997e-05	4.18475
ENSMUSG00000113853.2	TEC	Gm47583	2	OTTMUSG00000067434.1	chr13	HAVANA	gene	63358764	63362188	+	1.94845	-0.241485	6.1068	4.57262e-06	7.81325e-05	4.18422
ENSMUSG00000045838.10	protein_coding	Ccdc9b	2	OTTMUSG00000015637.1	chr2	HAVANA	gene	118584639	118593142	-	1.66799	6.89078	6.18487	3.83539e-06	6.76718e-05	4.17241
ENSMUSG00000002250.17	protein_coding	Ppard	2	OTTMUSG00000023384.1	chr17	HAVANA	gene	28451674	28520448	+	-1.04938	6.13625	-6.17553	3.91676e-06	6.88044e-05	4.17121
ENSMUSG00000031060.17	protein_coding	Rbm10	2	OTTMUSG00000017091.1	chrX	HAVANA	gene	20483742	20517140	+	-0.884462	5.96462	-6.17301	3.93898e-06	6.90735e-05	4.16959
ENSMUSG00000066406.17	protein_coding	Akap13	2	OTTMUSG00000034140.1	chr7	HAVANA	gene	75105282	75404357	+	1.46741	6.8583	6.17891	3.88711e-06	6.83435e-05	4.1602
ENSMUSG00000020160.19	protein_coding	Meis1	2	OTTMUSG00000005212.1	chr11	HAVANA	gene	18829817	18968985	-	1.75394	0.654834	6.0496	5.20372e-06	8.61237e-05	4.15785
ENSMUSG00000046410.11	protein_coding	Kcnk6	2	OTTMUSG00000059215.1	chr7	HAVANA	gene	28921351	28931940	-	1.45143	1.84166	6.03112	5.42616e-06	8.87779e-05	4.15719
ENSMUSG00000007338.11	protein_coding	Mrpl49	2	OTTMUSG00000074493.1	chr19	HAVANA	gene	6103652	6107815	-	-0.958458	5.75107	-6.16176	4.03995e-06	7.0474e-05	4.14994
ENSMUSG00000069874.8	protein_coding	Irgm2	2	OTTMUSG00000005725.1	chr11	HAVANA	gene	58090444	58113608	+	2.52202	0.263021	6.04212	5.29267e-06	8.72541e-05	4.14488
ENSMUSG00000044986.11	protein_coding	Tst	2	OTTMUSG00000070728.1	chr15	HAVANA	gene	78283756	78290107	-	-0.892781	4.50205	-6.11732	4.46545e-06	7.65626e-05	4.12375
ENSMUSG00000020399.15	protein_coding	Havcr2	2	OTTMUSG00000005503.1	chr11	HAVANA	gene	46345762	46372082	+	-2.34268	1.98118	-6.01149	5.6731e-06	9.16946e-05	4.12262
ENSMUSG00000039130.19	protein_coding	Zc3hc1	2	OTTMUSG00000014349.1	chr6	HAVANA	gene	30366379	30391027	-	-0.703283	4.98464	-6.129	4.34934e-06	7.50215e-05	4.11384
ENSMUSG00000024426.18	protein_coding	Atat1	2	OTTMUSG00000033103.1	chr17	HAVANA	gene	36208487	36220967	-	1.37388	4.3363	6.09343	4.71278e-06	7.99814e-05	4.10286
ENSMUSG00000079465.9	protein_coding	Col4a3	2	OTTMUSG00000021696.1	chr1	HAVANA	gene	82564642	82699780	+	6.01108	-2.27677	6.99718	6.44106e-07	1.8055e-05	4.09663
ENSMUSG00000031392.19	protein_coding	Irak1	1	OTTMUSG00000017687.1	chrX	HAVANA	gene	73057520	73067524	-	-0.56029	6.75223	-6.15064	4.14241e-06	7.18855e-05	4.09582
ENSMUSG00000029185.15	protein_coding	Fam114a1	2	OTTMUSG00000023413.1	chr5	HAVANA	gene	65127414	65199229	+	1.15244	4.28692	6.08144	4.84221e-06	8.15561e-05	4.09383
ENSMUSG00000039682.13	protein_coding	Lap3	2	OTTMUSG00000027770.1	chr5	HAVANA	gene	45650716	45670033	+	-1.04793	5.86848	-6.13568	4.28435e-06	7.40919e-05	4.08828
ENSMUSG00000024007.16	protein_coding	Ppil1	2	OTTMUSG00000028958.1	chr17	HAVANA	gene	29469777	29483160	-	-1.24825	5.48008	-6.12391	4.39951e-06	7.56263e-05	4.08706
ENSMUSG00000133402.1	lncRNA	ENSMUSG00000133402	2	NA	chr14	HAVANA	gene	34484358	34487056	-	2.53507	-1.73858	6.34479	2.68158e-06	5.20867e-05	4.0849
ENSMUSG00000006378.16	protein_coding	Gcat	2	OTTMUSG00000070766.1	chr15	HAVANA	gene	78915074	78922553	+	-1.98205	1.74273	-5.99142	5.93751e-06	9.51183e-05	4.07556
ENSMUSG00000050395.10	protein_coding	Tnfsf15	2	OTTMUSG00000000303.1	chr4	HAVANA	gene	63642840	63663350	-	1.90842	3.84767	6.07216	4.94488e-06	8.27543e-05	4.06855
ENSMUSG00000087142.10	lncRNA	Gm12454	2	OTTMUSG00000006930.1	chr4	HAVANA	gene	43504056	43508784	-	2.09796	-0.0921629	6.0418	5.29644e-06	8.72541e-05	4.06661
ENSMUSG00000020130.10	protein_coding	Tbc1d15	2	OTTMUSG00000064159.1	chr10	HAVANA	gene	115033777	115087372	-	-0.565971	6.12015	-6.13047	4.33496e-06	7.48379e-05	4.06364
ENSMUSG00000047996.17	protein_coding	Prrg1	2	OTTMUSG00000017869.1	chrX	HAVANA	gene	77493219	77627502	-	1.56474	4.86072	6.09579	4.68775e-06	7.96242e-05	4.06213
ENSMUSG00000026315.14	protein_coding	Serpinb8	2	OTTMUSG00000020994.1	chr1	HAVANA	gene	107517736	107538214	+	1.26102	4.35567	6.09131	4.73537e-06	8.02289e-05	4.05846
ENSMUSG00000001552.15	protein_coding	Jup	2	OTTMUSG00000006276.1	chr11	HAVANA	gene	100259784	100288589	-	0.625287	9.01556	6.13801	4.26189e-06	7.38309e-05	4.05437
ENSMUSG00000043284.13	protein_coding	Tmem11	2	OTTMUSG00000007749.1	chr11	HAVANA	gene	60755278	60770098	-	-0.949072	4.6016	-6.08664	4.78567e-06	8.08323e-05	4.05291
ENSMUSG00000023947.9	protein_coding	Nfkbie	2	OTTMUSG00000072141.1	chr17	HAVANA	gene	45866629	45874095	+	1.69529	2.69162	5.99716	5.86066e-06	9.42695e-05	4.05285
ENSMUSG00000074766.11	protein_coding	Ism1	2	OTTMUSG00000015588.1	chr2	HAVANA	gene	139520098	139600501	+	-3.8672	0.820255	-6.07368	4.9279e-06	8.25825e-05	4.05285
ENSMUSG00000026974.12	protein_coding	Zmynd19	2	OTTMUSG00000011513.1	chr2	HAVANA	gene	24839804	24852087	+	-1.66812	4.89107	-6.08661	4.78595e-06	8.08323e-05	4.05211
ENSMUSG00000022914.18	protein_coding	Brwd1	1	OTTMUSG00000020395.1	chr16	HAVANA	gene	95793292	95883726	-	0.663033	6.26067	6.12747	4.36433e-06	7.51506e-05	4.05098
ENSMUSG00000074088.7	protein_coding	Snrnp40	2	OTTMUSG00000042995.1	chr4	HAVANA	gene	130253925	130283819	+	-1.392	5.44109	-6.10639	4.57686e-06	7.81383e-05	4.04767
ENSMUSG00000124597.1	lncRNA	ENSMUSG00000124597	2	NA	chr1	HAVANA	gene	181448236	181454781	-	-2.74107	0.472451	-5.99426	5.89926e-06	9.47084e-05	4.04744
ENSMUSG00000002249.22	protein_coding	Tead3	2	OTTMUSG00000024245.1	chr17	HAVANA	gene	28550645	28569791	-	0.66964	4.87709	6.09669	4.67821e-06	7.95295e-05	4.03688
ENSMUSG00000033276.19	protein_coding	Stk36	2	OTTMUSG00000021747.1	chr1	HAVANA	gene	74640604	74676053	+	1.19952	2.92964	6.01287	5.65542e-06	9.14825e-05	4.0358
ENSMUSG00000045620.8	protein_coding	Cimap1c	2	OTTMUSG00000063131.1	chr9	HAVANA	gene	56755943	56771963	-	2.84623	-1.85533	6.18382	3.84446e-06	6.77722e-05	4.02781
ENSMUSG00000001518.13	protein_coding	Itfg2	2	OTTMUSG00000023984.1	chr6	HAVANA	gene	128386407	128401894	-	-0.617792	4.66737	-6.07202	4.94641e-06	8.27543e-05	4.02713
ENSMUSG00000036376.4	protein_coding	Abt1	2	OTTMUSG00000000736.1	chr13	HAVANA	gene	23602531	23608036	-	-0.911503	3.7527	-6.03572	5.36989e-06	8.80733e-05	4.02439
ENSMUSG00000028688.14	protein_coding	Toe1	2	OTTMUSG00000009757.1	chr4	HAVANA	gene	116651507	116664837	-	-0.829557	4.6426	-6.07077	4.96038e-06	8.29187e-05	4.01463
ENSMUSG00000026739.14	protein_coding	Bmi1	2	OTTMUSG00000011429.1	chr2	HAVANA	gene	18681829	18691440	+	-0.615456	6.29846	-6.11116	4.52788e-06	7.74342e-05	4.01321
ENSMUSG00000027652.16	protein_coding	Ralgapb	2	OTTMUSG00000015940.1	chr2	HAVANA	gene	158251768	158341173	+	-0.646375	7.53544	-6.11752	4.46339e-06	7.65626e-05	4.01162
ENSMUSG00000027706.9	protein_coding	Sec62	2	OTTMUSG00000051809.1	chr3	HAVANA	gene	30847024	30875412	+	0.666141	7.40571	6.11683	4.47036e-06	7.65811e-05	4.0104
ENSMUSG00000022156.9	protein_coding	Gzme	2	OTTMUSG00000068805.1	chr14	HAVANA	gene	56355083	56358082	-	-2.14447	2.5271	-5.97489	6.16459e-06	9.7218e-05	4.00886
ENSMUSG00000024654.9	protein_coding	Asrgl1	2	OTTMUSG00000028355.1	chr19	HAVANA	gene	9087232	9113000	-	-0.948381	3.95659	-6.0413	5.30252e-06	8.72541e-05	4.00841
ENSMUSG00000022894.7	protein_coding	Adamts5	2	OTTMUSG00000071713.1	chr16	HAVANA	gene	85653061	85698716	-	5.67173	2.12287	5.95912	6.38966e-06	9.99136e-05	4.00758
ENSMUSG00000002477.6	protein_coding	Snrpd1	2	OTTMUSG00000072951.1	chr18	HAVANA	gene	10617775	10642079	+	-1.51715	5.69566	-6.09141	4.73431e-06	8.02289e-05	4.00608
ENSMUSG00000024589.19	protein_coding	Nedd4l	2	OTTMUSG00000068477.1	chr18	HAVANA	gene	65020776	65350899	+	1.57475	6.1514	6.10193	4.62325e-06	7.8708e-05	4.00279
ENSMUSG00000018599.6	protein_coding	Mief2	2	OTTMUSG00000007763.1	chr11	HAVANA	gene	60619224	60623777	+	0.984591	3.66373	6.01878	5.58006e-06	9.06296e-05	3.996
ENSMUSG00000029761.17	protein_coding	Cald1	1	OTTMUSG00000014795.1	chr6	HAVANA	gene	34575435	34752408	+	1.14159	9.61862	6.11159	4.52348e-06	7.74249e-05	3.99549
ENSMUSG00000021377.16	protein_coding	Dek	2	OTTMUSG00000024779.1	chr13	HAVANA	gene	47238251	47259677	-	-1.58301	6.99793	-6.10517	4.5895e-06	7.82418e-05	3.99406
ENSMUSG00000087590.5	lncRNA	Epb41l4aos	2	OTTMUSG00000042342.1	chr18	HAVANA	gene	33927232	33932266	+	-1.59488	3.15094	-5.98569	6.01525e-06	9.58325e-05	3.98134
ENSMUSG00000046688.15	protein_coding	Tifa	2	OTTMUSG00000036830.1	chr3	HAVANA	gene	127583454	127625813	+	1.34412	2.80949	5.99165	5.93436e-06	9.51183e-05	3.97995
ENSMUSG00000056144.15	protein_coding	Trim34a	1	OTTMUSG00000019147.1	chr7	HAVANA	gene	103893664	103911441	+	1.83577	0.142935	5.96285	6.33561e-06	9.92002e-05	3.97212
ENSMUSG00000059142.17	protein_coding	Zfp945	2	OTTMUSG00000032978.1	chr17	HAVANA	gene	23065671	23086108	-	1.09594	3.60004	6.00775	5.72151e-06	9.23279e-05	3.96524
ENSMUSG00000055760.13	protein_coding	Gemin6	1	OTTMUSG00000024347.1	chr17	HAVANA	gene	80531870	80535926	+	-1.85493	2.99152	-5.96301	6.33336e-06	9.92002e-05	3.95634
ENSMUSG00000079575.4	processed_pseudogene	Rbpj-ps3	2	OTTMUSG00000043565.1	chr6	HAVANA	gene	46506288	46507728	-	-2.19172	-0.331393	-6.02771	5.46832e-06	8.93219e-05	3.94903
ENSMUSG00000057193.9	protein_coding	Slc44a2	2	OTTMUSG00000063301.1	chr9	HAVANA	gene	21231994	21266324	+	0.811898	8.25371	6.08926	4.75736e-06	8.05332e-05	3.94367
ENSMUSG00000024055.16	protein_coding	Cyp4f13	2	OTTMUSG00000032948.1	chr17	HAVANA	gene	33143662	33166376	-	1.53672	4.15714	6.01554	5.62122e-06	9.11403e-05	3.93984
ENSMUSG00000029094.13	protein_coding	Afap1	2	OTTMUSG00000024856.1	chr5	HAVANA	gene	36050663	36161267	+	1.03514	5.67459	6.06989	4.97029e-06	8.30151e-05	3.93817
ENSMUSG00000026166.15	protein_coding	Ccl20	1	OTTMUSG00000016631.1	chr1	HAVANA	gene	83094487	83096888	+	5.27689	1.27661	5.97484	6.16533e-06	9.7218e-05	3.93455
ENSMUSG00000028456.19	protein_coding	Unc13b	2	OTTMUSG00000006761.1	chr4	HAVANA	gene	43058953	43264871	+	0.702278	6.33613	6.07385	4.926e-06	8.25825e-05	3.93129
ENSMUSG00000031403.15	protein_coding	Dkc1	2	OTTMUSG00000020788.1	chrX	HAVANA	gene	74139460	74153383	+	-2.20947	5.61466	-6.04766	5.22669e-06	8.64324e-05	3.93114
ENSMUSG00000078812.11	protein_coding	Eif5a	2	OTTMUSG00000006023.1	chr11	HAVANA	gene	69807540	69812784	-	-1.26364	9.24919	-6.08282	4.82711e-06	8.13701e-05	3.92977
ENSMUSG00000033540.19	protein_coding	Idua	1	OTTMUSG00000027012.1	chr5	HAVANA	gene	108808197	108832423	+	1.19151	3.41817	5.9793	6.10315e-06	9.67141e-05	3.9269
ENSMUSG00000031576.17	protein_coding	Kcnu1	1	OTTMUSG00000031857.1	chr8	HAVANA	gene	26339651	26427967	+	4.47873	2.14734	5.92076	6.97271e-06	0.000106674	3.92537
ENSMUSG00000040112.10	protein_coding	Mrps35	2	OTTMUSG00000023793.1	chr6	HAVANA	gene	146944262	146975489	+	-0.916147	4.98579	-6.04004	5.31765e-06	8.74312e-05	3.92302
ENSMUSG00000023034.8	protein_coding	Nr4a1	2	OTTMUSG00000071152.1	chr15	HAVANA	gene	101152150	101172676	+	-1.77521	4.12364	-5.97223	6.20206e-06	9.75667e-05	3.92293
ENSMUSG00000068039.14	protein_coding	Tcp1	1	OTTMUSG00000028087.1	chr17	HAVANA	gene	13134588	13143954	+	-1.02435	8.3573	-6.07931	4.86556e-06	8.18235e-05	3.92168
ENSMUSG00000036636.11	protein_coding	Clcn7	1	OTTMUSG00000031166.1	chr17	HAVANA	gene	25352365	25381078	+	0.745335	5.86758	6.06155	5.06494e-06	8.42445e-05	3.91642
ENSMUSG00000097855.11	lncRNA	A930007I19Rik	2	OTTMUSG00000074031.1	chr19	HAVANA	gene	29442145	29500635	-	1.45817	1.73995	5.92042	6.97806e-06	0.000106674	3.91232
ENSMUSG00000062995.13	protein_coding	Ica1	1	OTTMUSG00000023181.1	chr6	HAVANA	gene	8630527	8778488	-	-0.74441	5.46548	-6.05111	5.18601e-06	8.59728e-05	3.91073
ENSMUSG00000113883.3	lncRNA	Gm36500	2	OTTMUSG00000067476.1	chr13	HAVANA	gene	34313848	34321637	+	2.83414	-0.0927067	5.97604	6.1485e-06	9.72057e-05	3.91011
ENSMUSG00000047810.10	protein_coding	Ccdc88b	2	OTTMUSG00000074501.1	chr19	HAVANA	gene	6821991	6835579	-	-2.45925	1.23829	-5.91243	7.10632e-06	0.000107826	3.90777
ENSMUSG00000079092.5	protein_coding	Prl2c2	2	OTTMUSG00000066581.1	chr13	HAVANA	gene	13170710	13179968	-	-4.23339	3.51267	-5.91839	7.01043e-06	0.000106916	3.9069
ENSMUSG00000002799.7	protein_coding	Jag2	2	OTTMUSG00000066105.1	chr12	HAVANA	gene	112871439	112893396	-	-1.18618	6.92346	-6.06739	4.99849e-06	8.3347e-05	3.90484
ENSMUSG00000027775.10	protein_coding	Mfsd1	2	OTTMUSG00000051286.1	chr3	HAVANA	gene	67490074	67511570	+	0.711973	7.07476	6.0685	4.98594e-06	8.3207e-05	3.90248
ENSMUSG00000027315.14	protein_coding	Spint1	2	OTTMUSG00000015880.1	chr2	HAVANA	gene	119067843	119080008	+	1.17392	7.00621	6.06555	5.01932e-06	8.35791e-05	3.89439
ENSMUSG00000116617.3	lncRNA	Gm49767	2	OTTMUSG00000071337.1	chr16	HAVANA	gene	31096674	31110714	-	2.38997	0.0974002	5.93337	6.7753e-06	0.000104693	3.89365
ENSMUSG00000029372.8	protein_coding	Ppbp	2	OTTMUSG00000055504.1	chr5	HAVANA	gene	90916377	90917922	+	4.45584	4.77007	5.94378	6.61654e-06	0.000102635	3.89107
ENSMUSG00000059834.13	protein_coding	Sclt1	2	OTTMUSG00000033588.1	chr3	HAVANA	gene	41581155	41696949	-	-1.18019	3.87934	-5.97559	6.15484e-06	9.72057e-05	3.88751
ENSMUSG00000014074.18	protein_coding	Rnf168	2	OTTMUSG00000025774.1	chr16	HAVANA	gene	32096277	32120252	+	-0.839604	5.63925	-6.04426	5.26709e-06	8.69569e-05	3.88749
ENSMUSG00000053398.12	protein_coding	Phgdh	2	OTTMUSG00000026317.1	chr3	HAVANA	gene	98220486	98247306	-	-1.62405	7.10731	-6.05929	5.09086e-06	8.46054e-05	3.88582
ENSMUSG00000059278.10	protein_coding	Naa38	2	OTTMUSG00000005977.1	chr11	HAVANA	gene	69286313	69287506	+	-0.874423	4.69769	-6.01504	5.62758e-06	9.11403e-05	3.88326
ENSMUSG00000028018.16	protein_coding	Gstcd	2	OTTMUSG00000023354.1	chr3	HAVANA	gene	132687513	132797794	-	-1.16152	5.65389	-6.0372	5.35195e-06	8.78509e-05	3.87968
ENSMUSG00000031378.15	protein_coding	Abcd1	2	OTTMUSG00000017700.1	chrX	HAVANA	gene	72760203	72782140	+	1.20234	4.69695	6.0105	5.68586e-06	9.18266e-05	3.87816
ENSMUSG00000080921.5	processed_pseudogene	Rpl38-ps2	2	OTTMUSG00000024018.1	chr6	HAVANA	gene	140692686	140692898	-	-1.37753	0.369216	-5.90732	7.18957e-06	0.000108798	3.87454
ENSMUSG00000032261.17	protein_coding	Sh3bgrl2	2	OTTMUSG00000044944.1	chr9	HAVANA	gene	83430380	83520854	+	-0.942571	6.85267	-6.05397	5.15254e-06	8.54929e-05	3.87434
ENSMUSG00000041712.8	protein_coding	Ubr7	2	OTTMUSG00000066113.1	chr12	HAVANA	gene	102724226	102743966	+	-0.887351	5.06975	-6.01979	5.5673e-06	9.04958e-05	3.86957
ENSMUSG00000085787.4	processed_pseudogene	Gm13092	2	OTTMUSG00000010394.1	chr4	HAVANA	gene	150399634	150399893	-	-1.77042	2.37734	-5.90677	7.19865e-06	0.0001088	3.86913
ENSMUSG00000040675.18	protein_coding	Mthfd1l	2	OTTMUSG00000029856.1	chr10	HAVANA	gene	3923118	4117081	+	-2.32304	6.53959	-6.03753	5.34796e-06	8.78509e-05	3.8598
ENSMUSG00000026070.17	protein_coding	Il18r1	2	OTTMUSG00000050472.1	chr1	HAVANA	gene	40504712	40540014	+	1.74092	5.55783	6.03378	5.39355e-06	8.83889e-05	3.8591
ENSMUSG00000032305.16	protein_coding	Fam219b	2	OTTMUSG00000063189.1	chr9	HAVANA	gene	57444811	57450467	+	-0.785917	4.31243	-5.98523	6.02153e-06	9.58562e-05	3.85651
ENSMUSG00000130941.1	lncRNA	ENSMUSG00000130941	2	NA	chr19	HAVANA	gene	45005894	45006210	+	1.88001	1.24876	5.8892	7.49299e-06	0.000111731	3.85507
ENSMUSG00000042997.14	protein_coding	Nhlrc3	2	OTTMUSG00000022219.1	chr3	HAVANA	gene	53356004	53370753	-	0.880437	5.28956	6.02367	5.51859e-06	8.98691e-05	3.85375
ENSMUSG00000020601.9	protein_coding	Trib2	2	OTTMUSG00000027552.1	chr12	HAVANA	gene	15841728	15866923	-	-2.89955	3.46828	-5.92063	6.97479e-06	0.000106674	3.84896
ENSMUSG00000025232.9	protein_coding	Hexa	2	OTTMUSG00000063295.1	chr9	HAVANA	gene	59446823	59472392	+	0.929109	6.08572	6.03317	5.40103e-06	8.8439e-05	3.84466
ENSMUSG00000027574.16	protein_coding	Nkain4	2	OTTMUSG00000016392.1	chr2	HAVANA	gene	180576565	180596492	-	3.1511	-0.977244	5.99839	5.84421e-06	9.40805e-05	3.84155
ENSMUSG00000038497.8	protein_coding	Tmco3	2	OTTMUSG00000060902.1	chr8	HAVANA	gene	13338190	13372924	+	1.09065	5.66779	6.02492	5.50302e-06	8.97422e-05	3.84056
ENSMUSG00000056429.5	protein_coding	Tgoln1	2	OTTMUSG00000037682.1	chr6	HAVANA	gene	72585415	72593983	-	0.660071	7.67385	6.04155	5.29954e-06	8.72541e-05	3.83772
ENSMUSG00000051043.17	protein_coding	Gprc5c	1	OTTMUSG00000003463.1	chr11	HAVANA	gene	114741978	114763443	+	2.36187	1.8465	5.902	7.27732e-06	0.000109493	3.81219
ENSMUSG00000020646.18	protein_coding	Mboat2	2	OTTMUSG00000066975.1	chr12	HAVANA	gene	24880878	25014396	+	0.991645	5.19122	5.99465	5.89404e-06	9.47084e-05	3.81081
ENSMUSG00000031703.9	protein_coding	Itfg1	2	OTTMUSG00000061424.1	chr8	HAVANA	gene	86444207	86567550	-	0.614507	6.82898	6.02358	5.51977e-06	8.98691e-05	3.80325
ENSMUSG00000040264.11	protein_coding	Gbp2b	2	OTTMUSG00000035259.1	chr3	HAVANA	gene	142300608	142324940	+	3.05516	0.636768	5.86894	7.84779e-06	0.000115853	3.80272
ENSMUSG00000038797.14	protein_coding	Zscan2	2	OTTMUSG00000027313.1	chr7	HAVANA	gene	80510668	80526285	+	1.5429	3.35679	5.91747	7.02518e-06	0.000106986	3.80076
ENSMUSG00000028063.16	protein_coding	Lmna	2	OTTMUSG00000030317.1	chr3	HAVANA	gene	88387454	88417263	-	-1.00233	9.67946	-6.02493	5.50281e-06	8.97422e-05	3.7988
ENSMUSG00000029727.8	protein_coding	Cyp3a13	2	OTTMUSG00000022877.1	chr5	HAVANA	gene	137891194	137919881	-	2.95112	5.16875	5.97233	6.20064e-06	9.75667e-05	3.78365
ENSMUSG00000000278.11	protein_coding	Scpep1	2	OTTMUSG00000001271.1	chr11	HAVANA	gene	88814846	88846291	-	0.835393	7.60176	6.01488	5.62971e-06	9.11403e-05	3.7766
ENSMUSG00000008682.14	protein_coding	Rpl10	2	OTTMUSG00000017647.1	chrX	HAVANA	gene	73314418	73316741	+	-0.905412	8.54113	-6.01574	5.61873e-06	9.11403e-05	3.77641
ENSMUSG00000033373.17	protein_coding	Fntb	2	OTTMUSG00000033888.1	chr12	HAVANA	gene	76812363	76968186	+	-0.934142	4.34973	-5.95322	6.47592e-06	0.000101002	3.77548
ENSMUSG00000026958.14	protein_coding	Dpp7	2	OTTMUSG00000011997.1	chr2	HAVANA	gene	25242288	25246371	-	1.07733	4.33241	5.95023	6.52011e-06	0.000101533	3.77407
ENSMUSG00000032827.16	protein_coding	Ppp1r9a	2	OTTMUSG00000042256.1	chr6	HAVANA	gene	4902917	5165661	+	1.51322	4.53427	5.96452	6.31173e-06	9.8981e-05	3.77341
ENSMUSG00000063632.7	protein_coding	Sox11	2	OTTMUSG00000021163.1	chr12	HAVANA	gene	27384263	27392573	-	2.06756	1.97384	5.86395	7.93768e-06	0.000116796	3.77296
ENSMUSG00000048368.10	protein_coding	Omd	2	OTTMUSG00000067234.1	chr13	HAVANA	gene	49735938	49746298	+	4.40173	-2.2445	6.33377	2.74823e-06	5.28176e-05	3.77165
ENSMUSG00000072235.7	protein_coding	Tuba1a	2	OTTMUSG00000017053.1	chr15	HAVANA	gene	98847718	98851584	-	1.64023	6.75924	6.00666	5.73564e-06	9.24814e-05	3.76912
ENSMUSG00000128875.1	lncRNA	ENSMUSG00000128875	2	NA	chr15	HAVANA	gene	76446766	76450648	-	3.11666	0.815044	5.85176	8.16202e-06	0.000119116	3.76802
ENSMUSG00000031928.16	protein_coding	Mre11a	1	OTTMUSG00000031684.1	chr9	HAVANA	gene	14695950	14748419	+	-1.43198	5.48877	-5.98223	6.06276e-06	9.62829e-05	3.76795
ENSMUSG00000024457.18	protein_coding	Trim26	2	OTTMUSG00000033434.1	chr17	HAVANA	gene	37148026	37170290	+	0.720743	5.80959	5.99405	5.90213e-06	9.47084e-05	3.76647
ENSMUSG00000027170.13	protein_coding	Eif3m	2	OTTMUSG00000014975.1	chr2	HAVANA	gene	104830001	104847425	-	-0.888563	6.36946	-6.00116	5.80758e-06	9.3566e-05	3.76485
ENSMUSG00000122364.1	lncRNA	ENSMUSG00000122364	2	NA	chr8	HAVANA	gene	47279741	47283239	-	-4.4725	-2.85427	-6.86212	8.61433e-07	2.24916e-05	3.76292
ENSMUSG00000040331.17	protein_coding	Nsmce4a	2	OTTMUSG00000035026.1	chr7	HAVANA	gene	130134256	130174848	-	-1.02747	5.43815	-5.97977	6.09667e-06	9.67141e-05	3.75852
ENSMUSG00000025764.15	protein_coding	Jade1	2	OTTMUSG00000051244.1	chr3	HAVANA	gene	41510166	41571299	+	-0.893928	5.71671	-5.98592	6.01216e-06	9.58325e-05	3.75813
ENSMUSG00000014907.11	protein_coding	Naf1	2	OTTMUSG00000031172.1	chr8	HAVANA	gene	67312869	67343216	+	-1.35041	4.5028	-5.94934	6.53345e-06	0.000101662	3.75768
ENSMUSG00000040483.16	protein_coding	Xaf1	2	OTTMUSG00000006106.1	chr11	HAVANA	gene	72192455	72204559	+	3.14753	0.80111	5.84262	8.3344e-06	0.000121138	3.75399
ENSMUSG00000116657.2	lncRNA	Gm49774	2	OTTMUSG00000071985.1	chr17	HAVANA	gene	27764681	27775492	-	-1.88354	0.921415	-5.8446	8.29677e-06	0.000120749	3.75321
ENSMUSG00000021326.14	protein_coding	Trim27	2	OTTMUSG00000032925.1	chr13	HAVANA	gene	21363615	21378894	+	-0.949112	6.0416	-5.9908	5.94585e-06	9.51183e-05	3.7499
ENSMUSG00000027424.12	protein_coding	Mgme1	2	OTTMUSG00000003459.1	chr2	HAVANA	gene	144112583	144123147	+	-1.85508	3.75931	-5.89434	7.40558e-06	0.000110757	3.74467
ENSMUSG00000028114.17	protein_coding	Mettl14	2	OTTMUSG00000037048.1	chr3	HAVANA	gene	123161946	123179757	-	-0.765783	4.95411	-5.95833	6.40113e-06	9.99136e-05	3.7428
ENSMUSG00000027327.17	protein_coding	Adissp	2	OTTMUSG00000015728.1	chr2	HAVANA	gene	130988244	131002001	-	-0.814679	5.03653	-5.96831	6.25752e-06	9.82847e-05	3.74024
ENSMUSG00000017264.17	protein_coding	Exosc10	2	OTTMUSG00000010937.1	chr4	HAVANA	gene	148642886	148666858	+	-0.802313	6.27177	-5.98641	6.00534e-06	9.5827e-05	3.73518
ENSMUSG00000115219.3	protein_coding	Eef1akmt4	2	OTTMUSG00000069892.1	chr16	HAVANA	gene	20430343	20437761	+	-1.58191	1.90121	-5.83759	8.43091e-06	0.000122081	3.73188
ENSMUSG00000022952.18	protein_coding	Runx1	1	OTTMUSG00000049470.1	chr16	HAVANA	gene	92398354	92623037	-	-0.872273	6.94123	-5.99031	5.9524e-06	9.51339e-05	3.72798
ENSMUSG00000031167.17	protein_coding	Rbm3	2	OTTMUSG00000018091.1	chrX	HAVANA	gene	8005214	8012119	-	-0.958555	7.72355	-5.99074	5.94667e-06	9.51183e-05	3.72265
ENSMUSG00000044393.16	protein_coding	Dsg2	2	OTTMUSG00000030073.1	chr18	HAVANA	gene	20691131	20737578	+	1.34491	7.05352	5.98825	5.98034e-06	9.55042e-05	3.71935
ENSMUSG00000050323.15	protein_coding	Ndufaf6	2	OTTMUSG00000004510.1	chr4	HAVANA	gene	11051045	11076205	-	-1.07223	2.25699	-5.84256	8.33555e-06	0.000121138	3.71668
ENSMUSG00000106658.3	lncRNA	Gm36548	2	OTTMUSG00000052939.1	chr5	HAVANA	gene	3320039	3377200	+	-1.82544	-0.330898	-5.87945	7.66169e-06	0.000113654	3.71002
ENSMUSG00000063011.8	protein_coding	Msln	2	OTTMUSG00000073251.1	chr17	HAVANA	gene	25967587	25973352	-	1.54862	10.5334	5.983	6.05203e-06	9.61888e-05	3.70692
ENSMUSG00000031996.18	protein_coding	Aplp2	2	OTTMUSG00000062829.1	chr9	HAVANA	gene	31060853	31123111	-	1.13693	8.21991	5.98481	6.02724e-06	9.58709e-05	3.70646
ENSMUSG00000025328.10	protein_coding	Padi3	1	OTTMUSG00000010034.1	chr4	HAVANA	gene	140512676	140537959	-	-4.193	-1.21715	-6.02227	5.53618e-06	9.0063e-05	3.70234
ENSMUSG00000042709.17	protein_coding	Atpaf2	2	OTTMUSG00000005820.1	chr11	HAVANA	gene	60291452	60309283	-	-0.684419	4.58627	-5.93295	6.78168e-06	0.000104711	3.70021
ENSMUSG00000022377.17	protein_coding	Asap1	2	OTTMUSG00000042047.1	chr15	HAVANA	gene	63958706	64254768	-	-0.553434	7.04218	-5.97921	6.1044e-06	9.67141e-05	3.69974
ENSMUSG00000016526.9	protein_coding	Dyrk3	2	OTTMUSG00000049119.1	chr1	HAVANA	gene	131055192	131066077	-	-1.55341	3.88305	-5.90481	7.23093e-06	0.000108959	3.69878
ENSMUSG00000034994.11	protein_coding	Eef2	2	OTTMUSG00000065058.1	chr10	HAVANA	gene	81012465	81018332	+	-0.828211	11.6068	-5.9758	6.15192e-06	9.72057e-05	3.69832
ENSMUSG00000040945.14	protein_coding	Rcc2	2	OTTMUSG00000010024.1	chr4	HAVANA	gene	140427852	140450531	+	-0.975897	8.21046	-5.978	6.12122e-06	9.6904e-05	3.69114
ENSMUSG00000025869.12	protein_coding	Nop16	1	OTTMUSG00000032680.1	chr13	HAVANA	gene	54731998	54737903	-	-1.37932	4.87977	-5.93012	6.8256e-06	0.000105227	3.69009
ENSMUSG00000085628.7	lncRNA	Appbp2os	2	OTTMUSG00000001032.1	chr11	HAVANA	gene	85125987	85154900	+	1.32195	1.19797	5.81069	8.96638e-06	0.000127529	3.68809
ENSMUSG00000025813.15	protein_coding	Homer2	2	OTTMUSG00000059182.1	chr7	HAVANA	gene	81250229	81357275	-	-2.57689	1.32837	-5.81085	8.9632e-06	0.000127529	3.68527
ENSMUSG00000051615.15	protein_coding	Rap2a	2	OTTMUSG00000017002.1	chr14	HAVANA	gene	120715856	120744606	+	-0.790834	4.73983	-5.93102	6.81165e-06	0.000105093	3.68284
ENSMUSG00000018548.16	protein_coding	Trim37	2	OTTMUSG00000001222.1	chr11	HAVANA	gene	87017903	87111509	+	-0.820115	5.8411	-5.95848	6.39897e-06	9.99136e-05	3.68135
ENSMUSG00000030007.9	protein_coding	Cct7	2	OTTMUSG00000057881.1	chr6	HAVANA	gene	85428496	85445457	+	-1.0918	8.37315	-5.97376	6.18044e-06	9.73795e-05	3.68118
ENSMUSG00000033577.19	protein_coding	Myo6	1	OTTMUSG00000017558.1	chr9	HAVANA	gene	80072313	80219011	+	1.46631	6.50707	5.9647	6.30902e-06	9.8981e-05	3.6803
ENSMUSG00000024777.11	protein_coding	Ppp2r5b	2	OTTMUSG00000018606.1	chr19	HAVANA	gene	6277795	6285902	-	1.4408	5.86351	5.94841	6.54724e-06	0.000101797	3.67184
ENSMUSG00000035834.12	protein_coding	Polr3g	2	OTTMUSG00000035047.1	chr13	HAVANA	gene	81821962	81859132	-	-1.2276	4.19531	-5.89691	7.36227e-06	0.000110357	3.67083
ENSMUSG00000030353.16	protein_coding	Tead4	2	OTTMUSG00000022461.1	chr6	HAVANA	gene	128201251	128277786	-	-0.750872	5.42589	-5.93366	6.77085e-06	0.000104693	3.65821
ENSMUSG00000020973.8	protein_coding	Dnaaf2	2	OTTMUSG00000023796.1	chr12	HAVANA	gene	69235861	69245203	-	-1.81121	1.05282	-5.79656	9.26157e-06	0.000130496	3.65292
ENSMUSG00000030203.18	protein_coding	Dusp16	2	OTTMUSG00000023267.1	chr6	HAVANA	gene	134692431	134769588	-	1.05064	5.08117	5.9272	6.87115e-06	0.000105766	3.65173
ENSMUSG00000039771.14	protein_coding	Polr2j	2	OTTMUSG00000025440.1	chr5	HAVANA	gene	136145485	136151801	+	-0.845255	4.80066	-5.9164	7.04226e-06	0.000107164	3.65104
ENSMUSG00000051065.10	protein_coding	Mb21d2	2	OTTMUSG00000071382.1	chr16	HAVANA	gene	28644928	28748425	-	-0.95678	3.67961	-5.8618	7.97685e-06	0.000117201	3.64882
ENSMUSG00000054717.8	protein_coding	Hmgb2	2	OTTMUSG00000060717.1	chr8	HAVANA	gene	57964941	57969033	+	-2.32961	6.03272	-5.93411	6.76384e-06	0.000104677	3.64546
ENSMUSG00000032333.7	protein_coding	Stoml1	2	OTTMUSG00000063236.1	chr9	HAVANA	gene	58160447	58169803	+	0.874104	4.70941	5.91274	7.10137e-06	0.000107826	3.64532
ENSMUSG00000022336.4	protein_coding	Eif3e	2	OTTMUSG00000070226.1	chr15	HAVANA	gene	43113454	43146115	-	-0.901199	7.3392	-5.95207	6.49301e-06	0.00010119	3.63649
ENSMUSG00000025475.18	protein_coding	Adgra1	2	OTTMUSG00000023085.1	chr7	HAVANA	gene	139414090	139458004	+	3.03411	1.77297	5.78366	9.53953e-06	0.000133128	3.62729
ENSMUSG00000020225.11	protein_coding	Tmbim4	2	OTTMUSG00000034095.1	chr10	HAVANA	gene	120037495	120060822	+	0.78086	5.37027	5.92479	6.90893e-06	0.000106266	3.62631
ENSMUSG00000037405.9	protein_coding	Icam1	2	OTTMUSG00000063048.1	chr9	HAVANA	gene	20927281	20940113	+	0.721495	5.39066	5.91959	6.99124e-06	0.000106789	3.62076
ENSMUSG00000028962.15	protein_coding	Slc4a2	2	OTTMUSG00000024167.1	chr5	HAVANA	gene	24628835	24645948	+	0.572679	7.7903	5.94582	6.5859e-06	0.000102319	3.61795
ENSMUSG00000025138.15	protein_coding	Sirt7	2	OTTMUSG00000004085.1	chr11	HAVANA	gene	120509198	120516066	-	0.913056	5.42999	5.91928	6.99629e-06	0.000106789	3.61777
ENSMUSG00000020267.7	protein_coding	Hint1	2	OTTMUSG00000005678.1	chr11	HAVANA	gene	54757209	54761327	+	-0.916754	7.33749	-5.94345	6.62162e-06	0.000102635	3.61742
ENSMUSG00000058173.13	protein_coding	Smco4	2	OTTMUSG00000062296.1	chr9	HAVANA	gene	15404728	15456556	+	-1.24727	2.67538	-5.80819	9.01791e-06	0.000127989	3.61173
ENSMUSG00000018415.15	protein_coding	Gid4	2	OTTMUSG00000005814.1	chr11	HAVANA	gene	60307971	60341753	+	-0.8373	4.91258	-5.90417	7.2415e-06	0.000109036	3.60986
ENSMUSG00000020171.9	protein_coding	Yeats4	2	OTTMUSG00000064286.1	chr10	HAVANA	gene	117051126	117060412	-	-0.860875	4.70237	-5.89274	7.43279e-06	0.000110999	3.60871
ENSMUSG00000029625.17	protein_coding	Cpsf4	2	OTTMUSG00000023017.1	chr5	HAVANA	gene	145104023	145118851	+	-0.786074	5.12486	-5.90564	7.21717e-06	0.000108868	3.6072
ENSMUSG00000027111.17	protein_coding	Itga6	2	OTTMUSG00000013266.1	chr2	HAVANA	gene	71575960	71688760	+	-1.0133	9.36408	-5.94074	6.66256e-06	0.00010319	3.60551
ENSMUSG00000008384.9	protein_coding	Sertad1	2	OTTMUSG00000023983.1	chr7	HAVANA	gene	27186335	27189741	+	-0.940845	4.76941	-5.89142	7.4552e-06	0.00011125	3.6014
ENSMUSG00000051076.9	protein_coding	Vtcn1	2	OTTMUSG00000007078.1	chr3	HAVANA	gene	100732775	100804238	+	6.294	1.14076	5.78914	9.42037e-06	0.000131925	3.60068
ENSMUSG00000039640.8	protein_coding	Mrpl12	2	OTTMUSG00000004268.1	chr11	HAVANA	gene	120375439	120379891	+	-1.22675	6.10669	-5.92258	6.94383e-06	0.000106597	3.59544
ENSMUSG00000024173.13	protein_coding	Tpsab1	2	OTTMUSG00000033716.1	chr17	HAVANA	gene	25562212	25564541	-	-6.23891	-1.9632	-6.6962	1.23527e-06	2.97675e-05	3.59249
ENSMUSG00000053799.9	protein_coding	Exoc6	2	OTTMUSG00000074097.1	chr19	HAVANA	gene	37509327	37672507	+	-0.72273	5.46321	-5.91006	7.14488e-06	0.000108314	3.59131
ENSMUSG00000027274.17	protein_coding	Mkks	2	OTTMUSG00000070328.1	chr2	HAVANA	gene	136715700	136733309	-	-0.768118	3.393	-5.82886	8.60093e-06	0.000123903	3.58978
ENSMUSG00000020620.15	protein_coding	Abca8b	2	OTTMUSG00000003354.1	chr11	HAVANA	gene	109823016	109886671	-	3.81061	1.17503	5.77692	9.68822e-06	0.000134547	3.58809
ENSMUSG00000022471.15	protein_coding	Xrcc6	2	OTTMUSG00000035734.1	chr15	HAVANA	gene	81872036	81924286	+	-1.23225	5.61846	-5.90711	7.19306e-06	0.000108798	3.58542
ENSMUSG00000029186.13	protein_coding	Pi4k2b	1	OTTMUSG00000023351.1	chr5	HAVANA	gene	52898916	52926682	+	-0.728888	6.34181	-5.92155	6.96022e-06	0.000106663	3.58424
ENSMUSG00000030493.14	protein_coding	Faap24	2	OTTMUSG00000024888.1	chr7	HAVANA	gene	35091577	35096261	-	-1.57276	3.18665	-5.80541	9.07564e-06	0.000128444	3.58291
ENSMUSG00000026192.14	protein_coding	Atic	2	OTTMUSG00000033605.1	chr1	HAVANA	gene	71596309	71618790	+	-1.63865	7.26161	-5.92147	6.9614e-06	0.000106663	3.57103
ENSMUSG00000022752.10	protein_coding	Tomm70a	2	OTTMUSG00000071585.1	chr16	HAVANA	gene	56942066	56977068	+	-1.05714	7.27166	-5.92242	6.94642e-06	0.000106597	3.56919
ENSMUSG00000025049.7	protein_coding	Taf5	2	OTTMUSG00000074280.1	chr19	HAVANA	gene	47056185	47071918	+	-1.2401	3.94155	-5.83494	8.48221e-06	0.000122645	3.56355
ENSMUSG00000018547.9	protein_coding	Pip4k2b	2	OTTMUSG00000002742.1	chr11	HAVANA	gene	97605983	97635530	-	-0.654913	6.20907	-5.91237	7.10728e-06	0.000107826	3.5618
ENSMUSG00000118671.1	protein_coding	Eppk1	2	NA	chr15	HAVANA	gene	75973330	76004395	-	1.05544	4.45714	5.85596	8.08403e-06	0.000118255	3.55978
ENSMUSG00000050912.16	protein_coding	Tmem123	2	OTTMUSG00000034120.1	chr9	HAVANA	gene	7764042	7794334	+	0.758829	7.15247	5.91809	7.01524e-06	0.000106916	3.55905
ENSMUSG00000029427.13	protein_coding	Zcchc8	2	OTTMUSG00000054725.1	chr5	HAVANA	gene	123836357	123859163	-	-0.545227	6.05016	-5.90617	7.20842e-06	0.000108866	3.55745
ENSMUSG00000107985.3	lncRNA	Gm35037	2	OTTMUSG00000057720.1	chr7	HAVANA	gene	3499822	3524352	+	-3.68054	0.168029	-5.8631	7.95313e-06	0.000116938	3.55686
ENSMUSG00000025059.17	protein_coding	Gk	2	OTTMUSG00000017916.1	chrX	HAVANA	gene	84745543	84820425	-	-0.877681	4.74087	-5.86928	7.84171e-06	0.000115853	3.55375
ENSMUSG00000020392.9	protein_coding	Cdkn2aipnl	2	OTTMUSG00000005612.1	chr11	HAVANA	gene	51858488	51868161	+	-1.318	6.31434	-5.90817	7.17568e-06	0.000108699	3.55277
ENSMUSG00000063200.5	protein_coding	Nol7	2	OTTMUSG00000067365.1	chr13	HAVANA	gene	43551866	43560573	+	-0.848275	5.91763	-5.90008	7.30937e-06	0.000109893	3.54995
ENSMUSG00000007739.11	protein_coding	Cct4	2	OTTMUSG00000005269.1	chr11	HAVANA	gene	22940519	22953780	+	-0.796141	7.87162	-5.9145	7.07296e-06	0.00010755	3.54648
ENSMUSG00000004018.10	protein_coding	Fancl	2	OTTMUSG00000008088.1	chr11	HAVANA	gene	26336135	26421876	+	-0.981993	3.45805	-5.81103	8.95954e-06	0.000127529	3.54537
ENSMUSG00000025626.17	protein_coding	Phf6	2	OTTMUSG00000017343.1	chrX	HAVANA	gene	52001143	52045820	+	-0.932083	5.82093	-5.8948	7.39783e-06	0.000110757	3.53932
ENSMUSG00000020773.12	protein_coding	Trim47	2	OTTMUSG00000003688.1	chr11	HAVANA	gene	115996578	116018036	-	-1.98348	3.71957	-5.79616	9.27008e-06	0.000130496	3.53597
ENSMUSG00000048826.8	protein_coding	Dact2	2	OTTMUSG00000072204.1	chr17	HAVANA	gene	14415314	14424566	-	1.14878	1.73519	5.76548	9.94604e-06	0.000137622	3.53454
ENSMUSG00000035969.16	protein_coding	Rusc2	2	OTTMUSG00000006785.1	chr4	HAVANA	gene	43381979	43427088	+	1.37265	5.4308	5.87281	7.77867e-06	0.000115134	3.53351
ENSMUSG00000023092.17	protein_coding	Fhl1	1	OTTMUSG00000017580.1	chrX	HAVANA	gene	55777147	55838706	+	3.05733	3.44114	5.79039	9.39343e-06	0.000131814	3.53328
ENSMUSG00000039033.12	protein_coding	Tasp1	2	OTTMUSG00000015577.1	chr2	HAVANA	gene	139675400	139908725	-	-0.991353	3.22671	-5.79419	9.31192e-06	0.000130955	3.53109
ENSMUSG00000031922.13	protein_coding	Cep57	2	OTTMUSG00000033418.1	chr9	HAVANA	gene	13719088	13738403	-	-0.723337	5.56722	-5.88397	7.58303e-06	0.000112905	3.53016
ENSMUSG00000040888.12	protein_coding	Gfer	2	OTTMUSG00000073035.1	chr17	HAVANA	gene	24912161	24915503	-	-0.956194	4.409	-5.84616	8.26714e-06	0.000120406	3.52788
ENSMUSG00000003458.13	protein_coding	Ncstn	2	OTTMUSG00000021508.1	chr1	HAVANA	gene	171893580	171910362	-	0.630118	7.41021	5.9055	7.21943e-06	0.000108868	3.52781
ENSMUSG00000002475.17	protein_coding	Abhd3	2	OTTMUSG00000028162.1	chr18	HAVANA	gene	10642092	10706771	-	1.92022	0.934052	5.73611	1.06402e-05	0.000144953	3.52674
ENSMUSG00000027698.15	protein_coding	Nceh1	2	OTTMUSG00000028153.1	chr3	HAVANA	gene	27237114	27338757	+	0.710926	6.00808	5.89401	7.41113e-06	0.000110758	3.52586
ENSMUSG00000021470.20	protein_coding	Ercc6l2	1	OTTMUSG00000026114.1	chr13	HAVANA	gene	63963054	64048116	+	-0.636755	5.5184	-5.88308	7.59834e-06	0.000112965	3.52487
ENSMUSG00000022364.15	protein_coding	Tbc1d31	2	OTTMUSG00000034888.1	chr15	HAVANA	gene	57775595	57833463	+	-1.45888	5.46149	-5.86879	7.85045e-06	0.000115853	3.52477
ENSMUSG00000038072.15	protein_coding	Galnt11	2	OTTMUSG00000024235.1	chr5	HAVANA	gene	25426902	25470916	+	0.693138	5.06295	5.86651	7.89138e-06	0.000116286	3.52072
ENSMUSG00000030880.15	protein_coding	Polr3e	2	OTTMUSG00000059323.1	chr7	HAVANA	gene	120516967	120546655	+	-0.804146	5.37839	-5.87598	7.7226e-06	0.000114388	3.52044
ENSMUSG00000027160.17	protein_coding	Ccdc34	2	OTTMUSG00000015056.1	chr2	HAVANA	gene	109848162	110003705	+	-0.901429	5.47712	-5.87763	7.69347e-06	0.000114041	3.52004
ENSMUSG00000024187.16	protein_coding	Fam234a	2	OTTMUSG00000026503.1	chr17	HAVANA	gene	26430796	26463216	-	1.10535	6.77982	5.8987	7.33238e-06	0.000110114	3.51958
ENSMUSG00000022443.18	protein_coding	Myh9	2	OTTMUSG00000016428.1	chr15	HAVANA	gene	77644787	77726375	-	0.911062	11.3256	5.89816	7.34145e-06	0.000110127	3.51775
ENSMUSG00000037336.15	protein_coding	Mfsd2b	2	OTTMUSG00000033541.1	chr12	HAVANA	gene	4912440	4924359	-	1.61588	0.885782	5.73111	1.07634e-05	0.000146035	3.51566
ENSMUSG00000038774.10	protein_coding	Ascc3	2	OTTMUSG00000063883.1	chr10	HAVANA	gene	50468765	50727581	+	-0.772997	7.04064	-5.89854	7.33504e-06	0.000110114	3.51553
ENSMUSG00000048039.9	protein_coding	Isg20l2	2	OTTMUSG00000032741.1	chr3	HAVANA	gene	87837621	87847993	+	-0.905406	5.68088	-5.88073	7.63922e-06	0.000113489	3.51422
ENSMUSG00000026308.9	protein_coding	Klhl30	2	OTTMUSG00000026754.1	chr1	HAVANA	gene	91278738	91290138	+	2.13833	3.26216	5.79603	9.27275e-06	0.000130496	3.51279
ENSMUSG00000033486.15	protein_coding	Catsper2	2	OTTMUSG00000015263.1	chr2	HAVANA	gene	121223112	121244273	-	1.16574	1.99167	5.73946	1.05588e-05	0.000144236	3.51134
ENSMUSG00000097789.3	protein_coding	Ctxnd1	2	OTTMUSG00000059548.1	chr7	HAVANA	gene	84178162	84232739	+	-2.25093	0.966384	-5.72879	1.0821e-05	0.000146618	3.51063
ENSMUSG00000022462.8	protein_coding	Slc38a2	2	OTTMUSG00000070889.1	chr15	HAVANA	gene	96585273	96597611	-	-0.82681	9.95114	-5.89463	7.40081e-06	0.000110757	3.50158
ENSMUSG00000033545.15	protein_coding	Znrf1	2	OTTMUSG00000038178.1	chr8	HAVANA	gene	112262729	112352662	+	0.74552	5.85444	5.87982	7.65522e-06	0.000113642	3.4997
ENSMUSG00000121309.2	lncRNA	Gm49327	2	NA	chr12	HAVANA	gene	17932052	17989661	+	0.930007	4.12855	5.82494	8.67849e-06	0.000124584	3.49385
ENSMUSG00000036023.7	protein_coding	Parp2	2	OTTMUSG00000069111.1	chr14	HAVANA	gene	51045298	51058758	+	-0.78538	5.14218	-5.85413	8.11796e-06	0.000118665	3.49219
ENSMUSG00000061479.16	protein_coding	Snrpa	2	OTTMUSG00000031830.1	chr7	HAVANA	gene	26886430	26895696	-	-0.77454	6.38993	-5.88322	7.59603e-06	0.000112965	3.49214
ENSMUSG00000121067.1	lncRNA	Gm56901	2	NA	chr17	HAVANA	gene	35115894	35116370	+	-1.1407	1.58355	-5.71956	1.10532e-05	0.000148758	3.48561
ENSMUSG00000053289.9	protein_coding	Ddx10	2	OTTMUSG00000063123.1	chr9	HAVANA	gene	53009935	53159353	-	-0.865414	5.43878	-5.86015	8.00705e-06	0.000117426	3.47943
ENSMUSG00000130913.1	lncRNA	ENSMUSG00000130913	2	NA	chr19	HAVANA	gene	45005207	45005571	+	1.73876	1.53956	5.71188	1.12503e-05	0.00015036	3.47046
ENSMUSG00000026319.14	protein_coding	Relch	2	OTTMUSG00000048965.1	chr1	HAVANA	gene	105591586	105682916	+	0.59009	5.94679	5.86418	7.93366e-06	0.000116796	3.45996
ENSMUSG00000015342.7	protein_coding	Xk	2	OTTMUSG00000016888.1	chrX	HAVANA	gene	9138995	9179489	+	0.678875	3.8958	5.81193	8.94094e-06	0.000127439	3.45679
ENSMUSG00000022503.11	protein_coding	Nubp1	2	OTTMUSG00000025747.1	chr16	HAVANA	gene	10229812	10242292	+	-1.18568	5.41946	-5.84188	8.34849e-06	0.000121238	3.44378
ENSMUSG00000022111.10	protein_coding	Uchl3	2	OTTMUSG00000069869.1	chr14	HAVANA	gene	101891403	101933561	+	-1.2442	4.84978	-5.82281	8.72105e-06	0.000124927	3.44308
ENSMUSG00000026203.17	protein_coding	Dnajb2	2	OTTMUSG00000048595.1	chr1	HAVANA	gene	75213050	75222336	+	1.08926	5.19911	5.83339	8.51229e-06	0.000122815	3.44154
ENSMUSG00000045545.9	protein_coding	Krt14	2	OTTMUSG00000002538.1	chr11	HAVANA	gene	100093988	100098374	-	2.25141	7.59242	5.86727	7.8777e-06	0.00011617	3.44083
ENSMUSG00000017707.10	protein_coding	Serinc3	2	OTTMUSG00000016123.1	chr2	HAVANA	gene	163465192	163487051	-	0.739495	8.35742	5.86907	7.84542e-06	0.000115853	3.44067
ENSMUSG00000030983.5	protein_coding	Bccip	2	OTTMUSG00000022582.1	chr7	HAVANA	gene	133311062	133322874	+	-1.10796	5.01197	-5.82497	8.67795e-06	0.000124584	3.43896
ENSMUSG00000022584.15	protein_coding	Ly6c2	2	OTTMUSG00000045164.1	chr15	HAVANA	gene	74980007	74983819	-	-4.64156	-2.66912	-6.19671	3.73467e-06	6.64804e-05	3.43622
ENSMUSG00000036097.10	protein_coding	Slf2	2	OTTMUSG00000074176.1	chr19	HAVANA	gene	44919558	44972225	+	-0.580873	6.66638	-5.86085	7.99422e-06	0.00011737	3.43546
ENSMUSG00000094613.4	lncRNA	A630076J17Rik	2	OTTMUSG00000052944.1	chr3	HAVANA	gene	107137930	107142041	+	7.22597	-2.29819	6.5391	1.74345e-06	3.82832e-05	3.43538
ENSMUSG00000045624.16	protein_coding	Esf1	2	OTTMUSG00000015586.1	chr2	HAVANA	gene	139961803	140012484	-	-1.02428	5.41611	-5.83682	8.44576e-06	0.000122207	3.43305
ENSMUSG00000026938.11	protein_coding	Fcna	2	OTTMUSG00000012513.1	chr2	HAVANA	gene	25514678	25518042	-	-2.27101	0.696441	-5.70508	1.14277e-05	0.000151457	3.43263
ENSMUSG00000018217.13	protein_coding	Pmp22	2	OTTMUSG00000005884.1	chr11	HAVANA	gene	63019808	63050373	+	1.56789	5.44961	5.82414	8.69448e-06	0.000124725	3.42948
ENSMUSG00000029859.7	protein_coding	Epha1	2	OTTMUSG00000057494.1	chr6	HAVANA	gene	42335421	42350202	-	0.980092	4.65528	5.82323	8.71259e-06	0.000124895	3.42736
ENSMUSG00000032511.18	protein_coding	Scn5a	2	OTTMUSG00000031832.1	chr9	HAVANA	gene	119312474	119408082	-	-3.62013	-0.326137	-5.74157	1.05075e-05	0.000143634	3.42719
ENSMUSG00000037894.14	protein_coding	H2az1	2	OTTMUSG00000022256.1	chr3	HAVANA	gene	137570248	137572683	+	-1.55975	7.16091	-5.8576	8.05386e-06	0.000117986	3.42637
ENSMUSG00000020235.17	protein_coding	Fzr1	2	OTTMUSG00000030386.1	chr10	HAVANA	gene	81202056	81214350	-	-0.622713	6.21758	-5.85272	8.14418e-06	0.000118961	3.42494
ENSMUSG00000036606.18	protein_coding	Plxnb2	2	OTTMUSG00000021019.1	chr15	HAVANA	gene	89039752	89064991	-	0.692828	10.1082	5.86	8.00976e-06	0.000117426	3.42335
ENSMUSG00000031875.8	protein_coding	Cmtm3	2	OTTMUSG00000061906.1	chr8	HAVANA	gene	105066042	105074304	+	1.22653	5.20342	5.82708	8.63609e-06	0.000124243	3.42296
ENSMUSG00000044573.17	protein_coding	Acp1	2	OTTMUSG00000065053.1	chr12	HAVANA	gene	30943325	30961588	-	-0.898951	3.99763	-5.78106	9.59663e-06	0.000133738	3.42195
ENSMUSG00000020256.15	protein_coding	Aldh1l2	1	OTTMUSG00000024804.1	chr10	HAVANA	gene	83323314	83370004	-	-2.39847	3.87	-5.75591	1.0167e-05	0.000139934	3.41641
ENSMUSG00000092118.2	protein_coding	Fancf	2	OTTMUSG00000059027.1	chr7	HAVANA	gene	51510325	51512015	-	-0.954995	2.72853	-5.71757	1.11039e-05	0.00014904	3.41622
ENSMUSG00000141257.1	lncRNA	ENSMUSG00000141257	2	NA	chr5	HAVANA	gene	4323313	4369044	+	2.93346	-2.20372	5.95899	6.39148e-06	9.99136e-05	3.41493
ENSMUSG00000118257.3	lncRNA	9630014M24Rik	2	OTTMUSG00000073473.1	chr18	HAVANA	gene	38734534	38971060	+	-5.11636	-1.97625	-6.36803	2.54631e-06	4.98181e-05	3.41138
ENSMUSG00000051674.16	protein_coding	Dcun1d4	2	OTTMUSG00000024911.1	chr5	HAVANA	gene	73638343	73718137	+	-0.71938	5.36203	-5.82859	8.60624e-06	0.000123903	3.40974
ENSMUSG00000011254.17	protein_coding	Thg1l	2	OTTMUSG00000005481.1	chr11	HAVANA	gene	45837670	45846321	-	-1.22545	3.48507	-5.74936	1.03211e-05	0.000141666	3.40888
ENSMUSG00000038866.16	protein_coding	Zcchc2	2	OTTMUSG00000026946.1	chr1	HAVANA	gene	105918136	105961804	+	-0.669907	5.58966	-5.83463	8.48827e-06	0.000122645	3.40872
ENSMUSG00000023011.9	protein_coding	Faim2	2	OTTMUSG00000071099.1	chr15	HAVANA	gene	99394893	99426046	-	-1.88331	0.110374	-5.70205	1.15076e-05	0.000152314	3.40398
ENSMUSG00000024785.8	protein_coding	Rcl1	2	OTTMUSG00000074024.1	chr19	HAVANA	gene	29078775	29121329	+	-1.75315	4.98179	-5.80109	9.16594e-06	0.000129539	3.39834
ENSMUSG00000047139.10	protein_coding	Cd24a	2	OTTMUSG00000063496.1	chr10	HAVANA	gene	43454280	43460261	+	1.14344	7.78259	5.84816	8.2295e-06	0.000119945	3.39649
ENSMUSG00000006442.11	protein_coding	Srm	2	OTTMUSG00000010928.1	chr4	HAVANA	gene	148675960	148679450	+	-2.44441	5.15108	-5.79212	9.35635e-06	0.000131488	3.3963
ENSMUSG00000110218.3	protein_coding	Tincr	2	OTTMUSG00000060183.1	chr17	HAVANA	gene	56858414	56861439	-	1.29993	2.8116	5.72817	1.08363e-05	0.000146726	3.38868
ENSMUSG00000018378.14	protein_coding	Cuedc1	2	OTTMUSG00000001478.1	chr11	HAVANA	gene	87988884	88084966	+	0.694705	5.16958	5.81495	8.87934e-06	0.000126922	3.38715
ENSMUSG00000026425.16	protein_coding	Srgap2	2	OTTMUSG00000049188.1	chr1	HAVANA	gene	131212989	131455090	-	0.558467	6.86751	5.84138	8.35814e-06	0.00012129	3.38678
ENSMUSG00000053080.11	protein_coding	Zfta	2	OTTMUSG00000034222.1	chr19	HAVANA	gene	7394990	7403269	+	0.976919	6.80084	5.83943	8.39554e-06	0.000121656	3.38611
ENSMUSG00000040034.16	protein_coding	Nup43	2	OTTMUSG00000034979.1	chr10	HAVANA	gene	7543267	7554645	+	-1.96548	4.15525	-5.76064	1.00571e-05	0.000138708	3.386
ENSMUSG00000114185.3	lncRNA	Gm47662	2	OTTMUSG00000067276.1	chr13	HAVANA	gene	33177630	33185749	+	3.63283	-1.83295	5.96838	6.25657e-06	9.82847e-05	3.38487
ENSMUSG00000028998.7	protein_coding	Tomm7	2	OTTMUSG00000028516.1	chr5	HAVANA	gene	24043942	24049159	-	-0.858827	5.17794	-5.81302	8.91873e-06	0.000127213	3.38417
ENSMUSG00000062866.17	protein_coding	Phactr2	1	OTTMUSG00000020940.1	chr10	HAVANA	gene	13083461	13350156	-	1.59255	3.79715	5.776	9.70884e-06	0.00013474	3.38109
ENSMUSG00000116270.3	lncRNA	Gm1600	2	OTTMUSG00000071189.1	chr16	HAVANA	gene	10141631	10169214	-	1.36583	0.850397	5.66955	1.24027e-05	0.000161075	3.37995
ENSMUSG00000027752.16	protein_coding	Exosc8	2	OTTMUSG00000028205.1	chr3	HAVANA	gene	54636099	54642814	-	-1.82925	5.24025	-5.8004	9.18044e-06	0.000129653	3.37928
ENSMUSG00000063488.7	protein_coding	Zkscan7	2	OTTMUSG00000062789.1	chr9	HAVANA	gene	122714750	122727683	+	1.15225	3.8452	5.75932	1.00876e-05	0.000139033	3.37568
ENSMUSG00000022656.16	protein_coding	Nectin3	2	OTTMUSG00000014968.1	chr16	HAVANA	gene	46208069	46318888	-	1.13261	5.49228	5.82232	8.73079e-06	0.000124977	3.37454
ENSMUSG00000034584.4	protein_coding	Exph5	2	OTTMUSG00000031816.1	chr9	HAVANA	gene	53212970	53288814	+	1.77226	4.31395	5.77717	9.6827e-06	0.000134547	3.37174
ENSMUSG00000074121.4	protein_coding	Ntf5	2	OTTMUSG00000059407.1	chr7	HAVANA	gene	45063119	45066603	+	1.29918	1.87027	5.685	1.19687e-05	0.000156759	3.37167
ENSMUSG00000021276.11	protein_coding	Cinp	2	OTTMUSG00000066282.1	chr12	HAVANA	gene	110839044	110855579	-	-1.47068	4.70454	-5.77911	9.6396e-06	0.000134057	3.36655
ENSMUSG00000073684.14	protein_coding	Faap20	2	OTTMUSG00000010597.1	chr4	HAVANA	gene	155334259	155341144	+	-0.638354	3.99694	-5.76359	9.98935e-06	0.000137926	3.36534
ENSMUSG00000042524.15	protein_coding	Sun2	2	OTTMUSG00000034297.1	chr15	HAVANA	gene	79608271	79626737	-	0.743019	7.38084	5.83342	8.51163e-06	0.000122815	3.36203
ENSMUSG00000039960.6	protein_coding	Rhou	2	OTTMUSG00000027612.1	chr8	HAVANA	gene	124380668	124390623	+	1.46845	4.93394	5.80542	9.07534e-06	0.000128444	3.35964
ENSMUSG00000026870.21	protein_coding	Cutal	2	OTTMUSG00000012021.1	chr2	HAVANA	gene	34764408	34782144	+	1.50892	2.11907	5.68927	1.18515e-05	0.000155631	3.35634
ENSMUSG00000028211.12	protein_coding	Trp53inp1	2	OTTMUSG00000004505.1	chr4	HAVANA	gene	11156431	11174379	+	1.92288	6.27502	5.82188	8.73961e-06	0.000125014	3.35247
ENSMUSG00000074194.5	protein_coding	Zfp791	2	OTTMUSG00000061405.1	chr8	HAVANA	gene	85835182	85849724	-	1.65618	2.61749	5.67973	1.21149e-05	0.00015826	3.3519
ENSMUSG00000000782.17	protein_coding	Tcf7	2	OTTMUSG00000005622.1	chr11	HAVANA	gene	52143198	52174158	-	-2.45324	2.79342	-5.68094	1.20813e-05	0.000157973	3.35086
ENSMUSG00000006498.17	protein_coding	Ptbp1	2	OTTMUSG00000035444.1	chr10	HAVANA	gene	79690261	79700605	+	-0.79681	9.00216	-5.82993	8.57996e-06	0.000123702	3.35069
ENSMUSG00000028544.15	protein_coding	Slc5a9	2	OTTMUSG00000009474.1	chr4	HAVANA	gene	111732572	111760115	-	2.54534	-0.158607	5.65682	1.27724e-05	0.000165125	3.35006
ENSMUSG00000079497.5	protein_coding	Prrt1b	2	OTTMUSG00000012042.1	chr2	HAVANA	gene	29634931	29641697	-	2.24614	-0.528265	5.71841	1.10825e-05	0.000148952	3.3492
ENSMUSG00000081087.2	processed_pseudogene	Rps15a-ps7	2	OTTMUSG00000015855.1	chr2	HAVANA	gene	152027211	152027602	-	-1.34791	2.08171	-5.67086	1.23652e-05	0.000160692	3.34902
ENSMUSG00000060152.15	protein_coding	Pop5	2	OTTMUSG00000014635.1	chr5	HAVANA	gene	115373895	115383410	+	-1.10722	3.66346	-5.7292	1.08107e-05	0.000146577	3.3459
ENSMUSG00000034243.18	protein_coding	Golgb1	2	OTTMUSG00000026955.1	chr16	HAVANA	gene	36695502	36753447	+	0.927733	8.30724	5.82638	8.64994e-06	0.000124353	3.34279
ENSMUSG00000032470.18	protein_coding	Mras	1	OTTMUSG00000029468.1	chr9	HAVANA	gene	99267473	99319434	-	1.54412	5.29009	5.78918	9.41966e-06	0.000131925	3.33909
ENSMUSG00000086775.9	lncRNA	Snhg7os	2	OTTMUSG00000011584.1	chr2	HAVANA	gene	26530010	26542132	+	1.73308	0.609361	5.65297	1.28863e-05	0.000165956	3.33807
ENSMUSG00000097651.5	lncRNA	4930461G14Rik	2	OTTMUSG00000063281.1	chr9	HAVANA	gene	58357023	58385049	+	-1.44955	2.59582	-5.67838	1.21528e-05	0.000158549	3.33437
ENSMUSG00000029821.16	protein_coding	Gsdme	1	OTTMUSG00000035970.1	chr6	HAVANA	gene	50165868	50240842	-	-2.57459	3.17006	-5.69001	1.18313e-05	0.000155469	3.33117
ENSMUSG00000035478.15	protein_coding	Mbd3	2	OTTMUSG00000019125.1	chr10	HAVANA	gene	80228373	80235384	-	-0.861669	6.58601	-5.8134	8.91099e-06	0.000127193	3.32783
ENSMUSG00000040321.4	protein_coding	Zfp770	2	OTTMUSG00000015214.1	chr2	HAVANA	gene	114023942	114031950	-	-0.928017	3.90298	-5.73188	1.07444e-05	0.000145933	3.32474
ENSMUSG00000001750.17	protein_coding	Tcirg1	2	OTTMUSG00000033070.1	chr19	HAVANA	gene	3946050	3957133	-	0.779017	7.00352	5.81354	8.908e-06	0.000127193	3.32129
ENSMUSG00000055134.7	lncRNA	9130017K11Rik	2	OTTMUSG00000005935.1	chr11	HAVANA	gene	67812330	67838485	+	1.42659	1.80238	5.64916	1.29999e-05	0.000166706	3.32075
ENSMUSG00000021816.12	protein_coding	Ppp3cb	2	OTTMUSG00000034313.1	chr14	HAVANA	gene	20549432	20596641	-	-0.572837	6.39817	-5.80892	9.0029e-06	0.000127867	3.32072
ENSMUSG00000035890.10	protein_coding	Rnf126	2	OTTMUSG00000064914.1	chr10	HAVANA	gene	79594349	79602786	-	-0.79378	6.10098	-5.80271	9.13179e-06	0.000129148	3.31657
ENSMUSG00000017548.16	protein_coding	Suz12	2	OTTMUSG00000000192.1	chr11	HAVANA	gene	79883932	79924949	+	-0.827001	6.91191	-5.80898	9.00159e-06	0.000127867	3.31306
ENSMUSG00000047832.10	protein_coding	Cdca4	2	OTTMUSG00000066076.1	chr12	HAVANA	gene	112783849	112793043	-	-1.42369	5.54897	-5.785	9.51034e-06	0.00013288	3.31014
ENSMUSG00000037461.11	protein_coding	Ints7	2	OTTMUSG00000051636.1	chr1	HAVANA	gene	191307748	191355800	+	-1.00421	5.63078	-5.79012	9.39928e-06	0.000131814	3.30944
ENSMUSG00000028977.18	protein_coding	Casz1	2	OTTMUSG00000010931.1	chr4	HAVANA	gene	148888886	149039346	+	3.40256	1.68901	5.64235	1.32062e-05	0.000168451	3.30894
ENSMUSG00000001909.17	protein_coding	Trmt1	2	OTTMUSG00000022183.1	chr8	HAVANA	gene	85412936	85426437	+	-0.690931	6.01453	-5.79796	9.23186e-06	0.000130287	3.30864
ENSMUSG00000028517.9	protein_coding	Plpp3	2	OTTMUSG00000008128.1	chr4	HAVANA	gene	105014544	105089961	+	-1.67541	4.72253	-5.75163	1.02676e-05	0.000141221	3.30734
ENSMUSG00000030167.16	protein_coding	Klrc1	2	OTTMUSG00000032510.1	chr6	HAVANA	gene	129642978	129655936	-	-1.69413	0.176129	-5.64293	1.31885e-05	0.000168395	3.30368
ENSMUSG00000001227.13	protein_coding	Sema6b	2	OTTMUSG00000072369.1	chr17	HAVANA	gene	56430085	56447343	-	-1.67007	3.82043	-5.70731	1.13692e-05	0.000151182	3.29987
ENSMUSG00000021282.18	protein_coding	Eif5	2	OTTMUSG00000066360.1	chr12	HAVANA	gene	111504450	111513186	+	-0.730613	8.25489	-5.80571	9.06939e-06	0.000128444	3.29558
ENSMUSG00000051166.11	protein_coding	Eml5	2	OTTMUSG00000065917.1	chr12	HAVANA	gene	98753064	98867743	-	1.00273	4.14777	5.73575	1.06492e-05	0.000144977	3.29223
ENSMUSG00000035242.17	protein_coding	Oaz1	2	OTTMUSG00000042344.1	chr10	HAVANA	gene	80662516	80665124	+	-0.708199	6.45869	-5.79626	9.26794e-06	0.000130496	3.28927
ENSMUSG00000046743.7	protein_coding	Fat4	2	OTTMUSG00000024693.1	chr3	HAVANA	gene	38941089	39066134	+	2.60359	0.0571529	5.62681	1.36887e-05	0.000172953	3.28789
ENSMUSG00000117063.3	lncRNA	Gm49936	2	OTTMUSG00000072201.1	chr17	HAVANA	gene	13709535	13981674	-	2.84449	-1.44892	5.85684	8.06774e-06	0.000118103	3.28275
ENSMUSG00000091586.3	protein_coding	Cyp4f17	2	OTTMUSG00000073310.1	chr17	HAVANA	gene	32725024	32749117	+	1.07482	3.40442	5.69772	1.16232e-05	0.000153302	3.27963
ENSMUSG00000073591.5	protein_coding	Pcdhb22	2	OTTMUSG00000050772.1	chr18	HAVANA	gene	37650924	37657532	+	1.3159	2.44258	5.65053	1.2959e-05	0.00016657	3.27875
ENSMUSG00000130774.1	lncRNA	ENSMUSG00000130774	2	NA	chr15	HAVANA	gene	80055813	80081405	+	2.59433	0.590399	5.65346	1.28717e-05	0.000165956	3.27233
ENSMUSG00000073775.5	protein_coding	Kti12	2	OTTMUSG00000008233.1	chr4	HAVANA	gene	108704982	108706610	+	-1.34441	4.33354	-5.72535	1.09068e-05	0.000147482	3.27096
ENSMUSG00000020692.15	protein_coding	Nle1	2	OTTMUSG00000000904.1	chr11	HAVANA	gene	82791594	82799237	-	-1.58886	4.0516	-5.70856	1.13364e-05	0.000151013	3.27091
ENSMUSG00000025135.13	protein_coding	Anapc11	2	OTTMUSG00000004083.1	chr11	HAVANA	gene	120489247	120499024	+	-0.794447	5.33769	-5.76992	9.84508e-06	0.000136441	3.27065
ENSMUSG00000028729.16	protein_coding	Ebna1bp2	2	OTTMUSG00000008747.1	chr4	HAVANA	gene	118477996	118484973	+	-1.2871	6.21561	-5.77955	9.63008e-06	0.000134018	3.26967
ENSMUSG00000112808.2	processed_pseudogene	Gm4739	2	OTTMUSG00000064459.1	chr10	HAVANA	gene	25983687	25984319	+	-2.40074	-0.970558	-5.7871	9.46459e-06	0.000132359	3.26701
ENSMUSG00000040711.9	protein_coding	Sh3pxd2b	2	OTTMUSG00000005375.1	chr11	HAVANA	gene	32297820	32378173	+	0.631152	7.13093	5.79055	9.39004e-06	0.000131814	3.26649
ENSMUSG00000074656.14	protein_coding	Eif2s2	1	OTTMUSG00000015977.1	chr2	HAVANA	gene	154713330	154734855	-	-1.10985	6.88693	-5.78811	9.44275e-06	0.000132146	3.26634
ENSMUSG00000072676.13	protein_coding	Tmem254	2	OTTMUSG00000044551.1	chr14	HAVANA	gene	25923724	25928096	-	0.812608	4.63498	5.75056	1.02928e-05	0.000141471	3.26562
ENSMUSG00000025894.12	protein_coding	Aasdhppt	2	OTTMUSG00000061683.1	chr9	HAVANA	gene	4294793	4309471	-	-0.89635	4.21784	-5.71999	1.10422e-05	0.000148709	3.26288
ENSMUSG00000037742.15	protein_coding	Eef1a1	2	OTTMUSG00000019692.1	chr9	HAVANA	gene	78385731	78396433	-	-0.893459	12.0455	-5.7801	9.61775e-06	0.000133939	3.25384
ENSMUSG00000026200.14	protein_coding	Glb1l	2	OTTMUSG00000021564.1	chr1	HAVANA	gene	75174880	75187457	-	1.06784	3.71668	5.68546	1.1956e-05	0.000156696	3.24699
ENSMUSG00000025931.16	protein_coding	Paqr8	2	OTTMUSG00000048364.1	chr1	HAVANA	gene	20960830	21009874	+	1.50581	5.97331	5.76778	9.89358e-06	0.000137019	3.24303
ENSMUSG00000006931.16	protein_coding	P3h4	2	OTTMUSG00000006272.1	chr11	HAVANA	gene	100299282	100305662	-	0.843552	4.22402	5.71915	1.10636e-05	0.000148798	3.23747
ENSMUSG00000020561.9	protein_coding	Polr1f	2	OTTMUSG00000065322.1	chr12	HAVANA	gene	33479634	33491391	+	-0.841272	4.63367	-5.72256	1.0977e-05	0.000148234	3.23368
ENSMUSG00000037426.19	protein_coding	Depdc5	2	OTTMUSG00000028553.1	chr5	HAVANA	gene	33021045	33151580	+	-0.557536	5.11824	-5.74621	1.03961e-05	0.0001425	3.2335
ENSMUSG00000094344.2	processed_pseudogene	Gm11942	2	OTTMUSG00000004999.1	chr4	HAVANA	gene	32964888	32965232	+	-1.16659	5.33714	-5.75011	1.03033e-05	0.000141519	3.23023
ENSMUSG00000024735.14	protein_coding	Prpf19	2	OTTMUSG00000046847.1	chr19	HAVANA	gene	10872595	10886923	+	-0.853125	8.06672	-5.77458	9.74036e-06	0.000135083	3.22431
ENSMUSG00000031683.17	protein_coding	Lsm6	2	OTTMUSG00000032840.1	chr8	HAVANA	gene	79531494	79547769	-	-1.35281	4.87757	-5.7167	1.11262e-05	0.000149239	3.20852
ENSMUSG00000024006.18	protein_coding	Stk38	2	OTTMUSG00000031637.1	chr17	HAVANA	gene	29189854	29226969	-	0.759307	7.31261	5.76483	9.96095e-06	0.000137666	3.20582
ENSMUSG00000049709.5	protein_coding	Nlrp10	2	OTTMUSG00000060096.1	chr7	HAVANA	gene	108521059	108529385	-	5.32168	-1.95537	6.03006	5.43929e-06	8.89202e-05	3.20565
ENSMUSG00000024800.9	protein_coding	Rpp30	2	OTTMUSG00000074042.1	chr19	HAVANA	gene	36061116	36082177	+	-1.23933	4.62124	-5.71141	1.12623e-05	0.00015036	3.20449
ENSMUSG00000035847.16	protein_coding	Ids	2	OTTMUSG00000025736.1	chrX	HAVANA	gene	69386675	69408690	-	0.585892	6.34445	5.75884	1.00988e-05	0.000139091	3.20359
ENSMUSG00000016496.8	protein_coding	Cd274	2	OTTMUSG00000014904.1	chr19	HAVANA	gene	29344855	29365495	+	1.34149	1.58503	5.59418	1.47614e-05	0.000182476	3.20138
ENSMUSG00000109084.3	lncRNA	Gm44955	2	OTTMUSG00000059104.1	chr8	HAVANA	gene	10963517	10997890	-	-5.77689	-2.09767	-6.43629	2.18819e-06	4.50454e-05	3.20038
ENSMUSG00000061315.15	protein_coding	Naca	2	OTTMUSG00000064925.1	chr10	HAVANA	gene	127871444	127884506	+	-0.901409	7.92035	-5.7634	9.99353e-06	0.000137926	3.19911
ENSMUSG00000052962.4	protein_coding	Mrpl35	2	OTTMUSG00000023742.1	chr6	HAVANA	gene	71789981	71803953	-	-0.952383	4.5723	-5.70583	1.14081e-05	0.000151397	3.19813
ENSMUSG00000026213.16	protein_coding	Stk11ip	2	OTTMUSG00000019423.1	chr1	HAVANA	gene	75498173	75513979	+	0.6554	4.87936	5.72037	1.10326e-05	0.00014868	3.19131
ENSMUSG00000041995.9	protein_coding	Zbed3	2	OTTMUSG00000067552.1	chr13	HAVANA	gene	95460120	95474349	+	-0.744919	4.74369	-5.71254	1.12331e-05	0.00015036	3.19033
ENSMUSG00000063445.15	protein_coding	Nmral1	2	OTTMUSG00000026648.1	chr16	HAVANA	gene	4527923	4537220	-	-1.31687	4.32887	-5.68549	1.1955e-05	0.000156696	3.18048
ENSMUSG00000007837.12	protein_coding	Prrg2	1	OTTMUSG00000023492.1	chr7	HAVANA	gene	44703008	44712101	-	0.799708	4.40059	5.70063	1.15454e-05	0.000152613	3.17924
ENSMUSG00000039356.16	protein_coding	Exosc2	2	OTTMUSG00000012075.1	chr2	HAVANA	gene	31560727	31571361	+	-1.63691	4.85606	-5.69753	1.16282e-05	0.000153302	3.179
ENSMUSG00000030411.17	protein_coding	Nova2	2	OTTMUSG00000036901.1	chr7	HAVANA	gene	18659813	18699244	+	1.60477	2.56006	5.60039	1.4551e-05	0.000180432	3.17602
ENSMUSG00000038975.15	protein_coding	Rabggtb	2	OTTMUSG00000052933.1	chr3	HAVANA	gene	153612924	153618646	-	-1.0561	6.44801	-5.74378	1.04544e-05	0.000143005	3.17598
ENSMUSG00000106241.2	TEC	Gm43143	2	OTTMUSG00000053845.1	chr5	HAVANA	gene	25892371	25894393	-	-2.20739	0.744193	-5.58785	1.49794e-05	0.000184339	3.17432
ENSMUSG00000054364.6	protein_coding	Rhob	2	OTTMUSG00000065440.1	chr12	HAVANA	gene	8547661	8550009	-	1.84819	6.89353	5.74738	1.03682e-05	0.000142215	3.17275
ENSMUSG00000001763.15	protein_coding	Tspan33	2	OTTMUSG00000013447.1	chr6	HAVANA	gene	29694221	29718558	+	1.64784	0.208051	5.57702	1.53597e-05	0.000187443	3.16664
ENSMUSG00000022773.20	protein_coding	Ypel1	2	OTTMUSG00000023943.1	chr16	HAVANA	gene	16887560	16904909	+	2.16614	2.58415	5.61646	1.40202e-05	0.00017559	3.16612
ENSMUSG00000075010.8	lncRNA	AW112010	2	OTTMUSG00000044620.1	chr19	HAVANA	gene	11021549	11033246	-	4.59133	1.97756	5.56776	1.56925e-05	0.000190113	3.15871
ENSMUSG00000046062.6	protein_coding	Ppp1r15b	2	OTTMUSG00000022095.1	chr1	HAVANA	gene	133058881	133067521	+	-0.617521	7.72426	-5.74502	1.04246e-05	0.000142695	3.1574
ENSMUSG00000060098.12	protein_coding	Prmt7	2	OTTMUSG00000020645.1	chr8	HAVANA	gene	106937568	106979426	+	-1.16544	5.23748	-5.71001	1.12987e-05	0.000150644	3.15703
ENSMUSG00000092203.10	lncRNA	1110038B12Rik	2	OTTMUSG00000037139.1	chr17	HAVANA	gene	35149718	35171867	-	-1.00298	6.67384	-5.7382	1.05894e-05	0.000144458	3.15396
ENSMUSG00000103472.2	protein_coding	Pcdhga7	2	OTTMUSG00000050812.1	chr18	HAVANA	gene	37847817	37974926	+	1.48098	0.518194	5.56607	1.57543e-05	0.000190632	3.15305
ENSMUSG00000011752.8	protein_coding	Pgam1	2	OTTMUSG00000074214.1	chr19	HAVANA	gene	41900362	41907099	+	-1.02196	6.55582	-5.73717	1.06145e-05	0.000144701	3.15258
ENSMUSG00000076846.4	TR_V_gene	Trav13-2	2	OTTMUSG00000015063.1	chr14	HAVANA	gene	53872286	53872856	+	3.45432	-0.683892	5.6238	1.37842e-05	0.000173407	3.14786
[truncated: 18,522 more rows]

## Sheet: LKR10 Trp53-sgRNA RMC vs Veh
gene_id	gene_type	gene_name	level	havana_gene	chr	DB	Type	start	end	strand	logFC	AveExpr	t	P.Value	adj.P.Val	B
[truncated: 20,026 more rows]

[truncated: 2 more sheets: LKR10 Stk11-sgRNA RMC vs Veh, LKR10 Keap1-sgRNA RMC vs Veh]
