# Supplementary material
Source: Research Square preprint supplement (doi:10.21203/rs.3.rs-9085811/v1)
Supplement: Supplementary file 1 [file 921742c38c47a7bcd9bd3bca.docx]

**Blockade of the KRAS-FOSL1 axis elicits DNA damage repair deficiency exploitable with local and systemic genotoxic therapies (Welch et al.)**

**SUPPLEMENTARY INFORMATION**

- **Supplementary Figures and Legends (1-5).**
- **Supplementary Table Legends (1-4).**
- **Supplementary References.**

**SUPPLEMENTARY FIGURES**

**Suppl. Fig. 1.** **KRAS inhibition induces DNA damage repair deficiency. A and B.** Expression of LKB1, KEAP1 and P53 proteins in mouse NSCLC LKR10 (KRAS G12C, A) and KLA (KRAS G12D, B) cells (loading control: GAPDH). **C-D.** Gene Ontology analysis ofbiological pathways in the downregulated protein data sets from H358 (NSCLC, C) and MiaPaca2 (PDAC, D) cells after Sotorasib treatment, using ShinyGo. Proteomics data obtained from Santana-Codina N et al.19.

**Suppl. Fig. 2. Synergistic antitumor effect of radiotherapy and KRASi on mutant *KRAS* LUAD and PDAC cell lines. A.** Long-term effect of RT and KRASi combination on cell viability of mutant *KRAS* HPAFII cells (PDAC). 10-day treatment (control: Ctrl; RT: 1 Gy; KRASi: 12.5 nM MRTX1133) (data: mean +/- SD; test: one-way ANOVA, Tukey’s adjustment). Representative crystal violet staining images are shown. **B-D.** Growth of H1792 (NSCLC, B), MiaPaca2 (PDAC, C) and 511950 (mouse PDAC, D) cells upon indicated treatments (RT: 10, 10 and 20 Gy respectively; KRASi: 0.5 μM, 0.1 μM and 2.5 μM respectively) until the emergence of resistance (n = 1 biological experiment). **E.** Mouse weight at the start (S) or at the end (E) of subcutaneous growth experiments of H358, H2030, MiaPaca2, T1 (mouse) and 511950 (mouse) cell lines upon indicated treatments. N: 8-12 Rag2-/-; Il2γr-/- mice (human cell lines) or F1 C57BL/6 x 129S4/Sv mice (mouse cell lines) per group (data: mean +/- SEM; test: one-way ANOVA, Tukey’s adjustment). **F.** Concentration of liver damage serum markers in Rag2-/-; Il2γr-/- mice of subcutaneous growth experiments of H358 and H2030 cell lines upon indicated treatments. ALP: alkaline phosphatase; ASP: aspartate aminotransferase; ALT: alanine aminotransferase; ALB: albumin (data: mean +/- SEM; test: one-way ANOVA, Tukey’s adjustment). **G.** Concentration of liver damage serum markers in F1 C57BL/6 x 129S4/Sv mice of subcutaneous growth experiments of T1 cell line upon indicated treatments. ALP: alkaline phosphatase; ASP: aspartate aminotransferase; ALT: alanine aminotransferase; ALB: albumin (data: median ± 95% CI; test: one-way ANOVA, Tukey’s adjustment). **H-I.** Blood cell counts in F1 C57BL/6 x 129S4/Sv mice of subcutaneous growth experiments of T1 (H) and 511950 (I) cell lines upon indicated treatments. WBC: white blood cells (data: median ± 95% CI; test: one-way ANOVA, Tukey’s adjustment).

**Suppl. Fig. 3. KRASi induces a homologous recombination deficiency state in drug-tolerant populations. A.** Heat map of RNA expression of HR genes in mouse mutant *KRAS* PDAC (FC1242), NSCLC (KLA and LKR10 cells CRISPR-edited for *Trp53*, *Stk11* and *Keap1* genes. NT: non-targeting) and CCA (KPch) cells lines subjected to pharmacological KRAS inhibition. **B.** qPCR analysis of RNA expression of *BRCA1*, *BRCA2* and *RAD51* genes in H2030 (NSCLC) and MiaPaca2 (PDAC) cell lines. **C and D.** Normalized expression of BRCA1, BRCA2 and RAD51 RNA expression from KRAS G12D NSCLC mouse cells (proliferative + non-proliferative) treated with vehicle or KRASi (MRTX1133) for 5 (B) or 20 (D) days (data: median +/- SD; analysis method: DESeq2). **E and F.** Normalized expression of BRCA1, BRCA2 and RAD51 RNA expression from KRAS G12D NSCLC mouse proliferative cells treated with vehicle or KRASi (MRTX1133) for (B) 5 or (D) 20 days (data: median +/- SD; analysis method: DESeq2). **G.** Scheme of “mVenusP27K-” plasmid which expresses mVenus fluorescent protein only when cells are in G0 and G1 phases of the cell cycle.

**Suppl. Fig. 4. Synergistic antitumor effect of PARPi and KRASi on mutant *KRAS* NSCLC and PDAC cell lines. A.** γH2AX protein expression in H358 and HPAFII cell lines after 48 h of PARPi (5 μM) and KRASi (10 and 50 nM respectively) treatment (loading control: β-Tubulin). **B-D.** Growth of H2030 (human, B), H1792 (human, C) and 511950 (mouse, D) cells treated with indicated drugs (PARPi: 5 μM; KRASi: 5 μM, 0.5 μM and 2.5 μM respectively) until the emergence of resistance (n = 1 biological experiment). **E.** RAD51 and BRCA2 protein expression in CRC cell lines (LS513, RW7213 and C106) treated with KRASi (100 nM MRTX1133, 50 nM and 1 μM sotorasib respectively) and EGFRi (cetuximab: CTX, 50 μg/mL) for 72 and 96 h (loading control: vinculin). **F and G.** Growth of RW7213 (F) and C106 (G) CRC cells treated with indicated drugs (PARPi: 5 μM; KRASi: 0.05 μM and 1 μM respectively; EGFRi (CTX): 50 mg/mL) until the emergence of resistance (n = 1 biological experiment). **H.** Subcutaneous growth of T1 cell-derived tumors treated with indicated drugs (PARPi: 50 mg/kg; KRASi: 30 mg/kg). N= 8-12 tumors per group in F1 C57BL/6 x 129S4/Sv mice (data: mean +/- SEM; test: two-way ANOVA, Tukey’s multiple comparisons). **I.** Waterfall plots of tumors from H (T1) at the last day of experiment represented as percent growth fold change (test: Kruskal-Wallis). **J.** Subcutaneous growth of 511950 cell-derived tumors treated with indicated drugs (PARPi: 50 mg/kg; KRASi: 10 mg/kg). N= 8-12 tumors per group in F1 C57BL/6 x 129S4/Sv mice (data: mean +/- SEM; test: two-way ANOVA, Sidak’s multiple comparisons). **K.** Waterfall plots of tumors from J (511950) at day 15 of experiment represented as percent growth fold change (test: Brown Forsythe and Welch ANOVA). **L.** Mouse weight at the start (S) and at the end (E) of subcutaneous growth experiments of NSCLC (H358, T1 and H2030), PDAC (MiaPaca2, HPAFII and 511950) and PDX92-treated with indicated drugs. N: 8-12 Rag2-/-; Il2γr-/- mice (human cell lines) or F1 C57BL/6 x 129S4/Sv mice (mouse cell lines) per group (data: mean +/- SEM; test: one-way ANOVA, Tukey’s adjustment). **M.** Concentration of liver damage serum markers in mice from subcutaneous growth experiments of H358, H2030 and T1 cell lines treated with indicated drugs. ALP: alkaline phosphatase; ASP: aspartate aminotransferase; ALT: alanine aminotransferase (data: mean +/- SEM; test: one-way ANOVA, Tukey’s adjustment).

**Suppl. Fig. 5. FOSL1 genetic inhibition renders NSCLC and PDAC cells sensitive to DNA damaging therapies. A and B.** FOSL1 gene expression in responders and non-responders NSCLC cell lines to PARPi-s Niraparib (A) and Talazoparib (B) treatment. Data obtained from Genomics of Drug Sensitivity in Cancer portal (version 2) via ROCplot.org1 (data: median ± 95% CI; test: ROC). **C.** FOSL1 protein expression of H358 TET_FOSL1sh and HPAFII TET_FOSL1 cell lines treated with 2 μM of doxycycline, at the end of TTP assay (loading control: HSP90). **D.** Kaplan-Meier plot showing overall survival of NSCLC patients treated exclusively with chemotherapy (CT) as a function of FOSL1 expression using KM plotter (test: Logrank).

**SUPPLEMENTARY TABLE LEGENDS (for Suppl. Tables uploaded as individual Excel files)**

**- Suppl. Table 1. (related to Figure 1A-D).** Limma analysis of differentially expressed genes in H358 or HPAFII cells expressing a KRAS shRNA or a control (GFP) shRNA; H358 cells treated with vehicle or sotorasib (1 μ M) for 24 hours; HPAFII cells treated with MRTX1133 (1 μM); and LKR10 cells expressing a non-targeting (nt), a *Trp53*, a *Stk11*, or a *Keap1* sgRNA and treated with RMC-7977 (1 μM) for 24 hours.

**- Suppl. Table 2. (related to Figure 1E).** Limma analysis of HUCCT1, KKU-213A, FC1242 and KPch cell lines treated with RMC-7977 (1 μM) for 24 hours, and KLA cells expressing a non-targeting (nt), a *Trp53*, a *Stk11*, or a *Keap1* sgRNA and treated with MRTX1133 (1 μM) for 24 hours.

**- Suppl. Table 3 (related to Figure 3H).** Limma analysis of RNA-seq data from a NSCLC patient treated with sotorasib from which multiple lymph node tumor lesions were biopsied pre and posttreatment2.

**- Suppl. Table 4 (related to Figure 5A-E).** Step-by-step integrative analysis to identify transcriptional regulators of KKRAS-regulated, PARPi-sensitizing genes common to H358 and HPAFII cells.

**SUPPLEMENTARY REFERENCES**

1. Fekete, J. T. & Győrffy, B. ROCplot.org: Validating predictive biomarkers of chemotherapy/hormonal therapy/anti-HER2 therapy using transcriptomic data of 3,104 breast cancer patients. *Int. J. Cancer* **145**, (2019).

2. Tsai, Y. S. *et al.* Rapid idiosyncratic mechanisms of clinical resistance to KRAS G12C inhibition. *J. Clin. Invest.* **132**, (2022).
