# Supplementary material
Source: Research Square preprint supplement (doi:10.21203/rs.3.rs-9085811/v1)
Supplement: Supplementary file 2 [file 7b559fbc27988df00987ad59.xlsx]

## Sheet: PostVsPre_Lymph
gene_id	gene_type	gene_name	level	havana_gene	chr	DB	Type	start	end	strand	logFC	AveExpr	t	P.Value	adj.P.Val	B
ENSG00000212443.1	snoRNA	SNORA53	3	NA	chr12	ENSEMBL	gene	98599635	98599883	+	-5.39282	0.299315	-16.1153	2.00606e-08	0.000609402	8.90525
ENSG00000212402.1	snoRNA	SNORA74B	3	NA	chr5	ENSEMBL	gene	173020728	173020928	+	-3.72714	0.523834	-10.9022	7.88689e-07	0.00771822	6.12782
ENSG00000252010.1	scaRNA	SCARNA5	3	NA	chr2	ENSEMBL	gene	233275727	233276002	+	-4.29421	3.4797	-10.3099	1.31528e-06	0.00771822	5.93883
ENSG00000200156.1	snRNA	RNU5B-1	3	NA	chr15	ENSEMBL	gene	65304677	65304792	+	-6.52379	-1.27909	-10.334	1.28758e-06	0.00771822	5.53165
ENSG00000263934.5	snoRNA	SNORD3A	2	OTTHUMG00000178445.2	chr17	HAVANA	gene	19188016	19188714	+	-5.51257	7.92872	-9.83471	2.01903e-06	0.00771822	5.51477
ENSG00000212232.1	snoRNA	SNORD17	3	NA	chr20	ENSEMBL	gene	17962710	17962946	-	-3.52285	4.91831	-9.57007	2.58269e-06	0.00784569	5.29703
ENSG00000199568.1	snRNA	RNU5A-1	3	NA	chr15	ENSEMBL	gene	65296051	65296166	+	-7.08898	-1.68788	-9.69394	2.29997e-06	0.00776316	5.01594
ENSG00000215417.15	lncRNA	MIR17HG	2	OTTHUMG00000017195.5	chr13	HAVANA	gene	91347686	91397592	+	-2.83999	2.35795	-9.07335	4.16387e-06	0.0105408	4.79815
ENSG00000275110.1	miRNA	ENSG00000275110	3	NA	chrX	ENSEMBL	gene	109054542	109054590	+	-4.76826	-3.99478	-10.0183	1.70752e-06	0.00771822	4.57372
ENSG00000277918.1	snRNA	RNVU1-28	3	NA	chr1	ENSEMBL	gene	144560666	144560829	-	-6.24408	-0.352828	-8.9521	4.69378e-06	0.0107191	4.54769
ENSG00000243488.3	misc_RNA	RN7SL337P	3	NA	chr19	ENSEMBL	gene	14584095	14584395	+	-4.8635	-3.96683	-9.89295	1.91396e-06	0.00771822	4.52557
ENSG00000265185.6	snoRNA	SNORD3B-1	2	OTTHUMG00000178499.2	chr17	HAVANA	gene	19061912	19062669	+	-4.93266	-3.95202	-9.82744	2.03258e-06	0.00771822	4.49921
ENSG00000101162.4	protein_coding	TUBB1	2	OTTHUMG00000032860.2	chr20	HAVANA	gene	59019429	59026654	+	-3.45857	-0.864123	-8.90074	4.94001e-06	0.0107191	4.3029
ENSG00000158485.11	protein_coding	CD1B	2	OTTHUMG00000017513.3	chr1	HAVANA	gene	158327951	158331531	-	-5.01916	-3.62495	-9.31961	3.27744e-06	0.0090511	4.18568
ENSG00000202538.1	snRNA	RNU4-2	3	NA	chr12	ENSEMBL	gene	120291763	120291903	-	-4.40991	3.69106	-8.20796	1.00838e-05	0.0153163	3.95868
ENSG00000228590.5	lncRNA	MIR4432HG	2	OTTHUMG00000152618.2	chr2	HAVANA	gene	60311286	60439841	-	-5.00885	-1.23981	-8.33609	8.8067e-06	0.0140805	3.9079
ENSG00000270722.1	snRNA	RNVU1-31	3	NA	chr1	ENSEMBL	gene	145465617	145465780	-	-5.53276	-3.08736	-8.53188	7.18254e-06	0.0137225	3.74979
ENSG00000239437.3	misc_RNA	RN7SL752P	3	NA	chr3	ENSEMBL	gene	129591349	129591635	+	-4.14949	-4.11702	-8.52582	7.2276e-06	0.0137225	3.49551
ENSG00000264772.6	lncRNA	ENSG00000264772	2	OTTHUMG00000178274.1	chr17	HAVANA	gene	7572826	7582024	+	-4.4626	-3.66327	-8.42885	7.99221e-06	0.0140805	3.47581
ENSG00000232810.5	protein_coding	TNF	2	OTTHUMG00000031194.3	chr6	HAVANA	gene	31575565	31578336	+	-4.70009	0.285702	-7.74351	1.67057e-05	0.0198224	3.42685
ENSG00000284032.1	miRNA	MIR29A	3	NA	chr7	ENSEMBL	gene	130876747	130876810	-	-4.52562	-4.03103	-8.3397	8.77328e-06	0.0140805	3.42587
ENSG00000260035.1	lncRNA	ENSG00000260035	2	OTTHUMG00000172834.1	chr15	HAVANA	gene	45200325	45200632	-	-5.2926	-3.24268	-8.07524	1.16223e-05	0.0166017	3.36902
ENSG00000302384.1	lncRNA	ENSG00000302384	2	NA	chr16	HAVANA	gene	3152896	3153135	+	-5.19333	-3.76259	-8.0438	1.20231e-05	0.0166017	3.2647
ENSG00000225885.8	lncRNA	ENSG00000225885	2	OTTHUMG00000059818.5	chr8	HAVANA	gene	118281290	118400605	+	-5.53448	-2.74573	-7.64586	1.86297e-05	0.0198224	3.12531
ENSG00000267568.7	lncRNA	ENSG00000267568	1	OTTHUMG00000177279.4	chr17	HAVANA	gene	76950316	76969530	-	-4.60401	-1.52668	-7.5505	2.07431e-05	0.0198224	3.10943
ENSG00000243066.3	misc_RNA	RN7SL842P	3	NA	chr19	ENSEMBL	gene	14588357	14588656	+	-4.89657	-3.6583	-7.78452	1.5963e-05	0.0198224	3.06802
ENSG00000138684.9	protein_coding	IL21	2	OTTHUMG00000133073.6	chr4	HAVANA	gene	122610108	122621066	-	-4.7738	-3.57634	-7.54956	2.0765e-05	0.0198224	2.86687
ENSG00000265558.1	miRNA	MIR3918	3	NA	chr6	ENSEMBL	gene	158764661	158764753	-	-4.21788	-3.89005	-7.60439	1.95184e-05	0.0198224	2.82575
ENSG00000232073.1	lncRNA	ENSG00000232073	1	OTTHUMG00000150009.1	chr22	HAVANA	gene	33164063	33166439	+	-5.32606	-3.20787	-7.39911	2.46516e-05	0.0220255	2.82175
ENSG00000223881.3	lncRNA	ENSG00000223881	2	OTTHUMG00000035655.1	chr1	HAVANA	gene	198597724	198598886	-	-4.28063	-3.87372	-7.58337	1.99865e-05	0.0198224	2.81749
ENSG00000273218.1	lncRNA	ENSG00000273218	2	OTTHUMG00000186035.1	chr19	HAVANA	gene	15346068	15348417	-	-3.74783	-4.03952	-7.68435	1.78441e-05	0.0198224	2.78767
ENSG00000105889.16	protein_coding	STEAP1B	2	OTTHUMG00000193419.2	chr7	HAVANA	gene	22419444	22727613	-	-2.95214	1.22216	-7.11761	3.42172e-05	0.027903	2.77869
ENSG00000166851.15	protein_coding	PLK1	2	OTTHUMG00000096984.6	chr16	HAVANA	gene	23677656	23690367	+	-2.23428	1.93878	-7.07887	3.58226e-05	0.027903	2.73889
ENSG00000260278.2	lncRNA	BMP2K-DT	2	OTTHUMG00000175992.1	chr4	HAVANA	gene	78768321	78775973	-	-3.69594	-4.04591	-7.61517	1.92831e-05	0.0198224	2.72659
ENSG00000101439.9	protein_coding	CST3	2	OTTHUMG00000032080.4	chr20	HAVANA	gene	23626706	23638473	-	2.16061	7.46621	7.10531	3.47186e-05	0.027903	2.69031
ENSG00000196240.6	protein_coding	OR2T2	2	OTTHUMG00000040480.3	chr1	HAVANA	gene	248445512	248455725	+	-3.79164	-4.18376	-7.54465	2.08808e-05	0.0198224	2.68422
ENSG00000300892.1	lncRNA	ENSG00000300892	2	NA	chr22	HAVANA	gene	33025593	33052539	-	-4.11311	-3.74946	-7.40512	2.44822e-05	0.0220255	2.64364
ENSG00000200959.1	snoRNA	SNORA74A	3	NA	chr5	ENSEMBL	gene	139278781	139278978	+	-5.45952	-0.834934	-6.97036	4.07685e-05	0.0288015	2.57902
ENSG00000217930.8	protein_coding	PAM16	1	OTTHUMG00000129466.3	chr16	HAVANA	gene	4331549	4355607	-	-2.19771	1.64897	-6.8917	4.48154e-05	0.0295957	2.52314
ENSG00000198976.1	miRNA	MIR429	3	NA	chr1	ENSEMBL	gene	1169005	1169087	+	-3.92002	-4.15327	-7.32532	2.68407e-05	0.0232962	2.51966
ENSG00000251791.1	scaRNA	SCARNA6	3	NA	chr2	ENSEMBL	gene	233288676	233288940	+	-2.7383	3.02335	-6.90074	4.43291e-05	0.0295957	2.50652
ENSG00000289888.2	lncRNA	ENSG00000289888	2	NA	chr22	HAVANA	gene	30271079	30272071	+	-4.68068	-2.00771	-6.90404	4.41529e-05	0.0295957	2.42207
ENSG00000210100.1	Mt_tRNA	MT-TI	3	NA	chrM	ENSEMBL	gene	4263	4331	+	-6.21215	-1.69464	-6.83033	4.82747e-05	0.0305518	2.38665
ENSG00000259932.1	lncRNA	ENSG00000259932	2	OTTHUMG00000172833.1	chr15	HAVANA	gene	45198517	45199139	-	-4.43208	-3.64368	-7.01902	3.84647e-05	0.0281734	2.3501
ENSG00000231607.16	lncRNA	DLEU2	2	OTTHUMG00000016927.14	chr13	HAVANA	gene	49956669	50126118	-	-1.63449	6.00495	-6.76751	5.21167e-05	0.0323102	2.25484
ENSG00000239899.3	misc_RNA	RN7SL674P	3	NA	chr2	ENSEMBL	gene	11584773	11585047	+	-3.31397	-0.856281	-6.72095	5.51782e-05	0.0331135	2.2465
ENSG00000310295.1	lncRNA	ENSG00000310295	2	NA	chr18	HAVANA	gene	59885213	59900233	-	-3.48745	-4.08807	-7.07889	3.58215e-05	0.027903	2.24091
ENSG00000225813.1	processed_pseudogene	ENSG00000225813	2	OTTHUMG00000153884.1	chr2	HAVANA	gene	161281902	161282618	+	-3.684	-4.21385	-7.01541	3.86306e-05	0.0281734	2.20606
ENSG00000278771.1	misc_RNA	RN7SL3	3	NA	chr14	ENSEMBL	gene	49853616	49853914	-	-3.29675	4.02505	-6.68092	5.79651e-05	0.0338628	2.1947
ENSG00000254244.1	processed_pseudogene	PAICSP4	1	OTTHUMG00000163651.1	chr8	HAVANA	gene	4787332	4788584	+	-3.74204	-4.18836	-6.85814	4.66727e-05	0.0301665	2.07819
ENSG00000289543.3	lncRNA	ENSG00000289543	2	NA	chr19	HAVANA	gene	5828335	5830353	+	-4.0435	-3.34033	-6.71486	5.55925e-05	0.0331135	2.05604
ENSG00000200795.1	snRNA	RNU4-1	3	NA	chr12	ENSEMBL	gene	120293097	120293237	-	-4.44104	2.30629	-6.52165	7.06618e-05	0.039394	2.05189
ENSG00000161270.20	protein_coding	NPHS1	2	OTTHUMG00000180689.4	chr19	HAVANA	gene	35825372	35869287	-	-4.77285	-2.53614	-6.58539	6.52519e-05	0.0374004	2.04275
ENSG00000280222.1	TEC	ENSG00000280222	2	OTTHUMG00000175756.1	chr1	HAVANA	gene	18109389	18115861	+	6.67927	-0.265185	7.00847	3.89519e-05	0.0281734	2.03915
ENSG00000088325.16	protein_coding	TPX2	2	OTTHUMG00000032190.3	chr20	HAVANA	gene	31739271	31801805	+	-2.66407	2.8002	-6.51305	7.14287e-05	0.039394	2.03627
ENSG00000245750.12	lncRNA	DRAIC	2	OTTHUMG00000172098.62	chr15	HAVANA	gene	69462921	69855357	+	-3.34851	0.750639	-6.40983	8.13595e-05	0.0395132	1.95
ENSG00000201998.1	snoRNA	SNORA23	3	NA	chr11	ENSEMBL	gene	9428773	9428954	+	-2.35677	0.684884	-6.3669	8.59214e-05	0.0395132	1.89606
ENSG00000206585.1	snRNA	RNVU1-7	3	NA	chr1	ENSEMBL	gene	148038753	148038916	-	-4.57896	-1.89916	-6.39306	8.31101e-05	0.0395132	1.87603
ENSG00000309658.1	lncRNA	ENSG00000309658	2	NA	chr9	HAVANA	gene	89316382	89318432	-	-3.69732	-2.88412	-6.49685	7.28964e-05	0.039394	1.87319
ENSG00000198826.11	protein_coding	ARHGAP11A	1	OTTHUMG00000129289.4	chr15	HAVANA	gene	32615144	32639941	+	-2.46346	2.0096	-6.35147	8.76276e-05	0.0395132	1.86049
ENSG00000274452.1	snRNA	U2	3	NA	chr17	ENSEMBL	gene	43290291	43290481	-	-4.66811	-3.344	-6.42621	7.96888e-05	0.0395132	1.78512
ENSG00000306334.1	lncRNA	ENSG00000306334	2	NA	chr7	HAVANA	gene	155270254	155286000	-	-3.99435	-3.99027	-6.48579	7.39172e-05	0.039394	1.74147
ENSG00000257275.7	lncRNA	ENSG00000257275	2	OTTHUMG00000171391.1	chr14	HAVANA	gene	95711747	95757656	+	-5.49086	-1.53266	-6.24449	0.000100512	0.0398337	1.72159
ENSG00000089280.20	protein_coding	FUS	2	OTTHUMG00000132395.5	chr16	HAVANA	gene	31180138	31196963	+	-1.7026	7.03043	-6.37408	8.51395e-05	0.0395132	1.72001
ENSG00000210196.2	Mt_tRNA	MT-TP	3	NA	chrM	ENSEMBL	gene	15956	16023	-	-5.51458	-0.45738	-6.22112	0.00010359	0.0398337	1.71386
ENSG00000289357.1	lncRNA	ENSG00000289357	2	NA	chr8	HAVANA	gene	25508779	25509735	+	-4.79968	-3.31687	-6.33273	8.97494e-05	0.0395132	1.71045
ENSG00000269688.1	lncRNA	ENSG00000269688	2	OTTHUMG00000182613.1	chr19	HAVANA	gene	38844729	38845499	-	-2.76884	0.376119	-6.19887	0.000106616	0.0404846	1.69079
ENSG00000275106.1	TEC	ENSG00000275106	2	OTTHUMG00000186757.1	chr7	HAVANA	gene	128952527	128953316	-	-3.14107	-2.2123	-6.29545	9.41358e-05	0.0397281	1.68647
ENSG00000301809.1	lncRNA	ENSG00000301809	2	NA	chr3	HAVANA	gene	152153368	152158297	+	-4.10767	-3.81113	-6.35928	8.67593e-05	0.0395132	1.65926
ENSG00000283199.3	protein_coding	C13orf46	2	OTTHUMG00000191740.3	chr13	HAVANA	gene	113953705	113974076	-	-2.27009	1.15167	-6.16985	0.000110706	0.0412977	1.65576
ENSG00000289312.2	lncRNA	ENSG00000289312	2	NA	chr6	HAVANA	gene	136288895	136305818	+	-4.27566	-2.64054	-6.26084	9.84167e-05	0.0398337	1.65343
ENSG00000184022.4	protein_coding	OR2T10	2	OTTHUMG00000040388.3	chr1	HAVANA	gene	248590487	248597700	-	-4.44371	-3.21329	-6.27391	9.67766e-05	0.0397281	1.64406
ENSG00000152463.15	protein_coding	OLAH	2	OTTHUMG00000017724.2	chr10	HAVANA	gene	15032227	15073853	+	5.13224	0.631686	6.37939	8.45662e-05	0.0395132	1.64066
ENSG00000072657.10	protein_coding	TRHDE	2	OTTHUMG00000169642.5	chr12	HAVANA	gene	72087266	72670758	+	6.63552	2.35841	6.36165	8.64972e-05	0.0395132	1.62798
ENSG00000225750.1	lncRNA	ENSG00000225750	2	OTTHUMG00000003643.1	chr1	HAVANA	gene	29144494	29146994	-	-3.72427	-3.6216	-6.33767	8.91846e-05	0.0395132	1.61821
ENSG00000224187.2	lncRNA	LINC01991	1	OTTHUMG00000156391.1	chr3	HAVANA	gene	187958338	188003990	-	-3.76179	-3.98165	-6.34967	8.78288e-05	0.0395132	1.60855
ENSG00000179428.2	lncRNA	IL6-AS1	2	OTTHUMG00000152547.1	chr7	HAVANA	gene	22725395	22727620	-	-2.84063	-1.52485	-6.16452	0.000111476	0.0412977	1.58241
ENSG00000308585.1	lncRNA	ENSG00000308585	2	NA	chr2	HAVANA	gene	96332531	96335745	-	-3.77876	-3.76592	-6.29298	9.44351e-05	0.0397281	1.57758
ENSG00000210195.2	Mt_tRNA	MT-TT	3	NA	chrM	ENSEMBL	gene	15888	15953	+	-5.99904	-2.45963	-6.13695	0.000115549	0.0419824	1.57535
ENSG00000275709.1	lncRNA	ENSG00000275709	2	OTTHUMG00000186848.1	chr15	HAVANA	gene	45585757	45586304	-	-3.85398	-3.28259	-6.22706	0.000102798	0.0398337	1.54882
ENSG00000305930.1	lncRNA	ENSG00000305930	2	NA	chr8	HAVANA	gene	65950408	65951672	-	-3.78508	-3.98334	-6.27851	9.62063e-05	0.0397281	1.53481
ENSG00000234183.2	lncRNA	H2AZ2-DT	2	OTTHUMG00000155819.1	chr7	HAVANA	gene	44848204	44883265	+	-3.79901	-3.23392	-6.22136	0.000103558	0.0398337	1.52828
ENSG00000291133.2	lncRNA	ENSG00000291133	2	NA	chr7	HAVANA	gene	35079988	35186899	-	-2.69561	-0.932055	-6.08236	0.000124095	0.0428383	1.52296
ENSG00000285521.2	lncRNA	ENSG00000285521	2	OTTHUMG00000193229.2	chr1	HAVANA	gene	205772992	205783623	+	-3.51515	-4.2501	-6.31742	9.15229e-05	0.0397183	1.52211
ENSG00000244642.3	misc_RNA	RN7SL396P	3	NA	chr8	ENSEMBL	gene	119862662	119862956	+	-4.40768	-2.615	-6.13338	0.000116088	0.0419824	1.51845
ENSG00000289872.2	lncRNA	ENSG00000289872	2	NA	chr20	HAVANA	gene	35742411	35745031	+	-3.45129	-1.82566	-6.09826	0.000121537	0.0426759	1.49179
ENSG00000111275.13	protein_coding	ALDH2	2	OTTHUMG00000169603.5	chr12	HAVANA	gene	111766887	111817532	+	2.30105	6.48132	6.0942	0.000122185	0.0426759	1.44046
ENSG00000253341.1	processed_pseudogene	PCBP2P2	1	OTTHUMG00000164512.1	chr8	HAVANA	gene	74603244	74604244	-	-2.5369	-1.09502	-6.00632	0.000137154	0.0452875	1.4018
ENSG00000239961.3	protein_coding	LILRA4	2	OTTHUMG00000065355.6	chr19	HAVANA	gene	54333185	54339162	-	-4.8725	-3.0991	-6.01273	0.000135997	0.0452875	1.37342
ENSG00000269553.1	lncRNA	ENSG00000269553	2	OTTHUMG00000183299.1	chr19	HAVANA	gene	35330843	35331920	+	-5.33786	-0.895401	-5.93288	0.000151182	0.0471742	1.358
ENSG00000275638.1	lncRNA	ENSG00000275638	2	OTTHUMG00000186934.1	chr15	HAVANA	gene	65655620	65656085	-	-3.87474	-1.14307	-5.92341	0.000153098	0.0471742	1.32438
ENSG00000224093.8	lncRNA	BCAR3-AS1	1	OTTHUMG00000010302.1	chr1	HAVANA	gene	93591964	93610605	+	-2.93362	-0.17841	-5.90473	0.000156961	0.0471742	1.32308
ENSG00000207205.1	snRNA	RNVU1-15	3	NA	chr1	ENSEMBL	gene	144412576	144412740	+	-4.79963	-2.40622	-5.9412	0.000149516	0.0471742	1.31626
ENSG00000263731.1	lncRNA	ENSG00000263731	2	OTTHUMG00000178529.2	chr17	HAVANA	gene	81878425	81881106	-	-2.34844	1.52329	-5.90169	0.0001576	0.0471742	1.31062
ENSG00000280725.3	lncRNA	LINC00251	2	OTTHUMG00000189557.2	chr8	HAVANA	gene	65160912	65184210	-	-4.10591	-3.59607	-6.00767	0.00013691	0.0452875	1.30545
ENSG00000126266.4	protein_coding	FFAR1	2	OTTHUMG00000188261.1	chr19	HAVANA	gene	35347902	35353864	+	-6.6815	-2.52505	-5.88294	0.000161598	0.0471742	1.27252
ENSG00000117154.12	protein_coding	IGSF21	2	OTTHUMG00000002432.4	chr1	HAVANA	gene	18107798	18378483	+	4.80751	-0.227617	6.09398	0.00012222	0.0426759	1.25754
ENSG00000163518.11	protein_coding	FCRL4	2	OTTHUMG00000035488.3	chr1	HAVANA	gene	157573747	157598085	-	-4.62706	-3.07875	-5.90494	0.000156916	0.0471742	1.24528
ENSG00000168329.14	protein_coding	CX3CR1	2	OTTHUMG00000156249.3	chr3	HAVANA	gene	39263495	39281735	-	-2.68091	0.432953	-5.84273	0.000170547	0.0474149	1.2442
ENSG00000158488.16	protein_coding	CD1E	2	OTTHUMG00000017515.5	chr1	HAVANA	gene	158353696	158357553	+	-4.93545	-2.06939	-5.83517	0.000172287	0.0474149	1.20789
ENSG00000295967.1	lncRNA	ENSG00000295967	2	NA	chr17	HAVANA	gene	41108231	41111781	+	-4.09188	-2.7903	-5.87492	0.000163341	0.0471742	1.20038
ENSG00000258346.2	lncRNA	ENSG00000258346	2	OTTHUMG00000169463.1	chr12	HAVANA	gene	116368764	116389471	+	-3.8717	-3.53039	-5.91449	0.000154929	0.0471742	1.19883
ENSG00000162576.17	protein_coding	MXRA8	2	OTTHUMG00000002973.5	chr1	HAVANA	gene	1352689	1361777	-	3.88599	6.14091	5.83053	0.000173366	0.0474149	1.16521
ENSG00000265237.1	miRNA	MIR3142	3	NA	chr5	ENSEMBL	gene	160474402	160474483	+	-3.18295	-4.31177	-5.99147	0.000139872	0.0456886	1.1595
ENSG00000274963.1	misc_RNA	RN7SL600P	3	NA	chr1	ENSEMBL	gene	150568971	150569269	-	-2.74384	-0.215141	-5.77519	0.000186799	0.0474651	1.15857
ENSG00000161888.12	protein_coding	SPC24	1	OTTHUMG00000180798.2	chr19	HAVANA	gene	11131520	11155807	-	-2.33309	0.894028	-5.77243	0.000187498	0.0474651	1.15071
ENSG00000231095.1	processed_pseudogene	GYG1P3	1	OTTHUMG00000008215.1	chr1	HAVANA	gene	55222379	55223372	+	-3.74487	-3.99478	-5.90713	0.000156459	0.0471742	1.13602
ENSG00000260979.2	lncRNA	USP7-AS1	2	OTTHUMG00000176992.1	chr16	HAVANA	gene	8962148	8967363	+	-4.10802	-3.58126	-5.86915	0.000164608	0.0471742	1.12643
ENSG00000128408.9	protein_coding	RIBC2	2	OTTHUMG00000151332.4	chr22	HAVANA	gene	45413693	45432509	+	-2.77153	-1.2389	-5.76079	0.000190475	0.0475357	1.11405
ENSG00000146215.14	protein_coding	CRIP3	2	OTTHUMG00000014727.2	chr6	HAVANA	gene	43299710	43308826	-	-2.90829	-1.22651	-5.75681	0.000191506	0.0475357	1.1025
ENSG00000199150.3	miRNA	MIRLET7G	3	NA	chr3	ENSEMBL	gene	52268278	52268361	-	-3.64639	-3.57986	-5.82206	0.000175352	0.0474149	1.08099
ENSG00000298600.1	lncRNA	ENSG00000298600	2	NA	chr4	HAVANA	gene	24974072	25000431	+	4.30033	-2.00804	6.02493	0.000133826	0.0452875	1.07751
ENSG00000289583.2	lncRNA	ENSG00000289583	2	NA	chr14	HAVANA	gene	68741747	68787379	-	-3.16603	-1.70871	-5.73067	0.000198418	0.0475357	1.06511
ENSG00000260303.1	lncRNA	ENSG00000260303	2	OTTHUMG00000176087.1	chr4	HAVANA	gene	146052604	146056762	-	-4.44847	-2.73981	-5.73633	0.000196901	0.0475357	1.06233
ENSG00000293240.2	lncRNA	ENSG00000293240	2	NA	chr17	HAVANA	gene	35888962	35911023	-	-3.89909	-3.64232	-5.79009	0.000183075	0.0474149	1.04857
ENSG00000297924.1	lncRNA	ENSG00000297924	2	NA	chr6	HAVANA	gene	37239949	37240074	-	-4.38413	-3.68595	-5.78565	0.000184178	0.0474149	1.04702
ENSG00000240790.4	lncRNA	SND1-DT	2	OTTHUMG00000157565.1	chr7	HAVANA	gene	127644685	127652068	-	-3.58221	-3.8051	-5.79821	0.00018108	0.0474149	1.02924
ENSG00000100079.7	protein_coding	LGALS2	2	OTTHUMG00000150590.22	chr22	HAVANA	gene	37570248	37582616	-	-4.10505	-3.31244	-5.78655	0.000183952	0.0474149	1.02632
ENSG00000285040.2	lncRNA	ENSG00000285040	2	OTTHUMG00000192583.1	chr16	HAVANA	gene	85963328	85985386	-	-3.43213	-4.04591	-5.82406	0.000174881	0.0474149	1.02565
ENSG00000299967.1	lncRNA	ENSG00000299967	2	NA	chr4	HAVANA	gene	73069851	73071828	+	-3.52479	-4.06847	-5.83053	0.000173366	0.0474149	1.02369
ENSG00000265972.6	protein_coding	TXNIP	2	OTTHUMG00000013755.7	chr1	HAVANA	gene	145992435	145996579	-	2.52538	10.1582	5.87227	0.000163921	0.0471742	1.02213
ENSG00000288988.2	lncRNA	ENSG00000288988	2	NA	chr3	HAVANA	gene	51380579	51385178	-	-3.2625	-0.955663	-5.67601	0.00021376	0.0483058	1.01773
ENSG00000199377.1	snRNA	RNU5F-1	3	NA	chr1	ENSEMBL	gene	44721786	44721902	-	-4.41411	-2.90001	-5.70952	0.00020421	0.0475357	1.01293
ENSG00000184661.14	protein_coding	CDCA2	1	OTTHUMG00000099429.7	chr8	HAVANA	gene	25459199	25507911	+	-3.93956	0.791846	-5.67491	0.000214079	0.0483058	1.00611
ENSG00000106366.9	protein_coding	SERPINE1	1	OTTHUMG00000157107.3	chr7	HAVANA	gene	101127104	101139247	+	2.98899	5.59992	5.70672	0.00020499	0.0475357	0.999828
ENSG00000117215.15	protein_coding	PLA2G2D	2	OTTHUMG00000002701.2	chr1	HAVANA	gene	20111939	20119566	-	-6.38992	-1.18154	-5.64407	0.000223309	0.0484612	0.990323
ENSG00000137801.11	protein_coding	THBS1	2	OTTHUMG00000133665.3	chr15	HAVANA	gene	39581079	39599466	+	4.56114	9.52664	5.81205	0.000177733	0.0474149	0.989079
ENSG00000198786.2	protein_coding	MT-ND5	3	NA	chrM	ENSEMBL	gene	12337	14148	+	-3.43387	8.95924	-5.88144	0.000161923	0.0471742	0.987868
ENSG00000265735.2	misc_RNA	RN7SL5P	3	NA	chr9	ENSEMBL	gene	9442060	9442380	+	-2.1342	2.95997	-5.71106	0.000203782	0.0475357	0.98691
ENSG00000287697.2	lncRNA	ENSG00000287697	2	OTTHUMG00000194004.1	chr1	HAVANA	gene	174997479	174999963	-	-2.56192	0.322981	-5.63878	0.000224933	0.0484612	0.983179
ENSG00000306752.1	lncRNA	ENSG00000306752	2	NA	chr17	HAVANA	gene	47896548	47897143	+	-2.31752	-0.78489	-5.63936	0.000224754	0.0484612	0.964664
ENSG00000298587.1	lncRNA	ENSG00000298587	2	NA	chr2	HAVANA	gene	1773022	1784297	-	-3.07248	-4.33242	-5.80978	0.000178277	0.0474149	0.95898
ENSG00000289257.3	lncRNA	ENSG00000289257	2	NA	chr6	HAVANA	gene	13328539	13330205	+	-4.02061	-3.58958	-5.71425	0.000202899	0.0475357	0.952769
ENSG00000076382.17	protein_coding	SPAG5	2	OTTHUMG00000166586.27	chr17	HAVANA	gene	28577565	28599025	-	-2.74534	2.69525	-5.66774	0.000216189	0.0483058	0.928052
ENSG00000301501.1	lncRNA	ENSG00000301501	2	NA	chr4	HAVANA	gene	55949263	55949558	+	-3.60621	-3.8438	-5.7168	0.000202196	0.0475357	0.922564
ENSG00000293746.1	lncRNA	ENSG00000293746	2	NA	chr10	HAVANA	gene	14468139	14512774	-	-4.05274	-3.60668	-5.68461	0.000211264	0.0483058	0.92176
ENSG00000023191.17	protein_coding	RNH1	2	OTTHUMG00000119086.10	chr11	HAVANA	gene	494512	507300	-	1.52727	6.64649	5.72237	0.00020067	0.0475357	0.913649
ENSG00000261602.1	lncRNA	ENSG00000261602	2	OTTHUMG00000176835.1	chr16	HAVANA	gene	69709874	69710583	+	-3.93114	-3.6327	-5.65073	0.00022128	0.0484612	0.890763
ENSG00000259668.6	lncRNA	ENSG00000259668	2	OTTHUMG00000172525.2	chr15	HAVANA	gene	51455268	51460582	+	6.33409	0.32365	5.74764	0.000193901	0.0475357	0.871042
ENSG00000279727.1	lncRNA	LINC02033	2	OTTHUMG00000189233.1	chr3	HAVANA	gene	36819276	36822498	-	-2.89538	-1.77994	-5.56876	0.000247686	0.0520523	0.864126
ENSG00000290018.1	lncRNA	ENSG00000290018	2	NA	chr2	HAVANA	gene	174719821	174720853	+	-1.73704	1.45696	-5.55095	0.000253859	0.0520523	0.850963
ENSG00000174371.17	protein_coding	EXO1	1	OTTHUMG00000039965.9	chr1	HAVANA	gene	241847967	241895148	+	-3.18058	0.000684885	-5.52824	0.000261974	0.0520523	0.833689
ENSG00000301568.1	lncRNA	ENSG00000301568	2	NA	chr3	HAVANA	gene	97032998	97036158	+	-2.9821	-1.66646	-5.53783	0.000258515	0.0520523	0.830639
ENSG00000267263.1	lncRNA	ENSG00000267263	2	OTTHUMG00000177716.1	chr17	HAVANA	gene	77469068	77471045	+	-2.55128	0.317418	-5.52675	0.000262517	0.0520523	0.829486
ENSG00000140534.14	protein_coding	TICRR	1	OTTHUMG00000149648.6	chr15	HAVANA	gene	89575469	89631056	+	-3.82638	0.577285	-5.53871	0.0002582	0.0520523	0.82737
ENSG00000279358.1	TEC	ENSG00000279358	2	OTTHUMG00000186081.1	chr11	HAVANA	gene	126934886	126937150	-	-4.53933	-2.11038	-5.51736	0.00026596	0.0521247	0.808948
ENSG00000288799.2	lncRNA	ENSG00000288799	2	NA	chr5	HAVANA	gene	172006704	172008003	+	-3.45108	-2.36672	-5.53034	0.000261214	0.0520523	0.787343
ENSG00000186417.15	protein_coding	GLDN	2	OTTHUMG00000131746.7	chr15	HAVANA	gene	51341655	51408005	+	5.90361	4.71706	5.48776	0.000277134	0.0528207	0.786754
ENSG00000288956.3	lncRNA	ENSG00000288956	2	NA	chr9	HAVANA	gene	129884322	129886015	-	-3.38202	-1.08001	-5.49428	0.000274628	0.0528207	0.78624
ENSG00000267670.1	lncRNA	ENSG00000267670	2	OTTHUMG00000181987.1	chr19	HAVANA	gene	14030855	14031557	-	-3.48269	-3.75879	-5.60257	0.000236406	0.0505743	0.780881
ENSG00000289901.2	lncRNA	ENSG00000289901	2	NA	chr13	HAVANA	gene	109424123	109424341	-	-5.45396	-1.96039	-5.48499	0.000278205	0.0528207	0.77555
ENSG00000095713.14	protein_coding	CRTAC1	1	OTTHUMG00000018871.2	chr10	HAVANA	gene	97865000	98030828	-	7.23162	0.510348	5.66749	0.000216261	0.0483058	0.763214
ENSG00000012048.26	protein_coding	BRCA1	2	OTTHUMG00000157426.16	chr17	HAVANA	gene	43044295	43170245	-	-1.73195	3.89958	-5.57302	0.000246235	0.0520523	0.755861
ENSG00000268889.3	lncRNA	LIM2-AS1	2	OTTHUMG00000183135.1	chr19	HAVANA	gene	51387085	51412636	+	-4.0873	-2.12433	-5.47477	0.000282196	0.0532457	0.750256
ENSG00000277895.2	lncRNA	ENSG00000277895	2	OTTHUMG00000168795.1	chr12	HAVANA	gene	64448379	64452901	-	-3.78088	-3.43154	-5.5296	0.000261478	0.0520523	0.741599
ENSG00000198178.11	protein_coding	CLEC4C	1	OTTHUMG00000168441.2	chr12	HAVANA	gene	7729383	7751605	-	-4.68197	-3.55953	-5.48768	0.000277162	0.0528207	0.710396
ENSG00000232373.2	processed_pseudogene	MTCYBP3	2	OTTHUMG00000017221.2	chr13	HAVANA	gene	95694569	95695705	+	-2.42312	-0.229417	-5.42959	0.000300586	0.0543524	0.709144
ENSG00000260177.2	lncRNA	ENSG00000260177	2	OTTHUMG00000176391.1	chr16	HAVANA	gene	87779815	87806631	-	-4.03738	-3.24164	-5.45404	0.000290478	0.0536136	0.684767
ENSG00000207005.1	snRNA	RNU1-2	3	NA	chr1	ENSEMBL	gene	16895980	16896143	+	-3.72562	-3.23738	-5.45662	0.000289433	0.0536136	0.662219
ENSG00000112182.16	protein_coding	BACH2	2	OTTHUMG00000015216.5	chr6	HAVANA	gene	89926528	90296843	-	-2.20167	4.61155	-5.52436	0.000263389	0.0520523	0.655905
ENSG00000294089.1	lncRNA	ENSG00000294089	2	NA	chr3	HAVANA	gene	58352525	58354343	-	-3.2143	-4.15327	-5.52376	0.000263608	0.0520523	0.652227
ENSG00000288960.3	lncRNA	ENSG00000288960	2	NA	chr2	HAVANA	gene	95057793	95076379	+	-3.34967	-4.06847	-5.4977	0.000273324	0.0528207	0.651465
ENSG00000175305.18	protein_coding	CCNE2	2	OTTHUMG00000164696.1	chr8	HAVANA	gene	94879770	94896678	-	-2.44792	0.730665	-5.39486	0.000315599	0.0556095	0.651308
ENSG00000166741.9	protein_coding	NNMT	2	OTTHUMG00000168245.1	chr11	HAVANA	gene	114257787	114313536	+	4.51308	5.96303	5.39968	0.000313468	0.0556095	0.633304
ENSG00000295105.1	lncRNA	ENSG00000295105	2	NA	chr11	HAVANA	gene	68460134	68460226	-	-3.88001	-3.79884	-5.44059	0.000295995	0.0538729	0.627975
ENSG00000276168.1	misc_RNA	RN7SL1	3	NA	chr14	ENSEMBL	gene	49586580	49586878	+	-1.90781	11.5303	-5.653	0.000220594	0.0484612	0.623053
ENSG00000171657.6	protein_coding	GPR82	2	OTTHUMG00000021373.2	chrX	HAVANA	gene	41724181	41730130	+	-4.0745	-1.84442	-5.36378	0.000329713	0.0569093	0.60466
ENSG00000210154.1	Mt_tRNA	MT-TD	3	NA	chrM	ENSEMBL	gene	7518	7585	+	-4.56981	-3.48303	-5.40043	0.000313138	0.0556095	0.603078
ENSG00000070831.18	protein_coding	CDC42	2	OTTHUMG00000002753.10	chr1	HAVANA	gene	22052627	22101360	+	-1.37054	5.72459	-5.52302	0.000263877	0.0520523	0.601847
ENSG00000268401.2	lncRNA	ENSG00000268401	2	OTTHUMG00000182490.2	chr19	HAVANA	gene	46027648	46031667	+	-3.43269	-1.3384	-5.34847	0.000336914	0.0571775	0.598867
ENSG00000201321.1	rRNA	RNA5S9	3	NA	chr1	ENSEMBL	gene	228628148	228628266	-	-3.82794	-3.667	-5.38183	0.000321434	0.0561179	0.564781
ENSG00000305630.1	lncRNA	ENSG00000305630	2	NA	chr1	HAVANA	gene	149927858	149928532	+	-3.04871	-4.18376	-5.45225	0.000291206	0.0536136	0.561582
ENSG00000183145.9	protein_coding	RIPPLY3	2	OTTHUMG00000086639.2	chr21	HAVANA	gene	37006150	37019662	+	-3.55315	-3.8051	-5.3924	0.000316691	0.0556095	0.561026
ENSG00000122966.18	protein_coding	CIT	1	OTTHUMG00000134325.9	chr12	HAVANA	gene	119685791	119877320	-	-2.00616	3.65991	-5.44019	0.000296161	0.0538729	0.551573
ENSG00000111665.12	protein_coding	CDCA3	1	OTTHUMG00000169014.2	chr12	HAVANA	gene	6844793	6851292	-	-3.08675	0.457816	-5.32782	0.000346892	0.0582204	0.551473
ENSG00000297649.1	lncRNA	ENSG00000297649	2	NA	chr10	HAVANA	gene	96737494	96751051	+	-3.81394	-3.14103	-5.35491	0.000333864	0.0571775	0.545247
ENSG00000295169.1	lncRNA	ENSG00000295169	2	NA	chr19	HAVANA	gene	12790870	12791272	-	-2.41443	-1.21198	-5.3064	0.000357581	0.0583989	0.531706
ENSG00000287001.4	lncRNA	ENSG00000287001	2	OTTHUMG00000195792.1	chr19	HAVANA	gene	50095888	50148304	-	-4.52005	-2.73372	-5.30643	0.000357565	0.0583989	0.530435
ENSG00000176890.16	protein_coding	TYMS	1	OTTHUMG00000131473.7	chr18	HAVANA	gene	657653	673578	+	-2.47091	1.39207	-5.31084	0.000355339	0.0583989	0.50747
ENSG00000289154.2	lncRNA	ENSG00000289154	2	NA	chr12	HAVANA	gene	54278612	54279698	-	-2.14422	0.996943	-5.29162	0.000365164	0.0583989	0.504407
ENSG00000089685.15	protein_coding	BIRC5	2	OTTHUMG00000177505.9	chr17	HAVANA	gene	78214186	78225636	+	-3.76941	0.581233	-5.2944	0.000363723	0.0583989	0.493727
ENSG00000109099.16	protein_coding	PMP22	1	OTTHUMG00000058960.7	chr17	HAVANA	gene	15229773	15272292	-	2.27845	6.79609	5.41086	0.000308584	0.0554684	0.492884
ENSG00000303728.1	lncRNA	ENSG00000303728	2	NA	chr19	HAVANA	gene	1940114	1940807	-	-3.0973	-2.31254	-5.27678	0.000372947	0.0583989	0.480944
ENSG00000188585.10	protein_coding	CLEC20A	2	OTTHUMG00000035021.6	chr1	HAVANA	gene	178479240	178499634	-	-3.46181	-3.38393	-5.31012	0.000355698	0.0583989	0.472625
ENSG00000265692.1	lncRNA	LINC01970	2	OTTHUMG00000178661.1	chr17	HAVANA	gene	82290046	82292814	-	-3.79264	-3.05562	-5.28478	0.000368726	0.0583989	0.469183
ENSG00000285437.2	protein_coding	POLR2J3	2	OTTHUMG00000192387.1	chr7	HAVANA	gene	102562133	102572583	-	-1.45362	4.0542	-5.37043	0.000326635	0.0567001	0.463567
ENSG00000164109.14	protein_coding	MAD2L1	2	OTTHUMG00000132967.4	chr4	HAVANA	gene	120055623	120066858	-	-2.36562	1.29516	-5.27774	0.000372439	0.0583989	0.462687
ENSG00000269939.1	lncRNA	PCF11-AS1	2	OTTHUMG00000183952.1	chr11	HAVANA	gene	83185521	83187036	-	-2.06874	-0.00123499	-5.24199	0.0003919	0.0594778	0.460237
ENSG00000305298.1	lncRNA	ENSG00000305298	2	NA	chr7	HAVANA	gene	142809115	142810311	+	-4.6078	-3.53619	-5.27772	0.000372446	0.0583989	0.457952
ENSG00000156234.8	protein_coding	CXCL13	2	OTTHUMG00000130201.3	chr4	HAVANA	gene	77511753	77611834	+	-5.02932	-0.789063	-5.24932	0.000387822	0.0594163	0.449157
ENSG00000162897.16	protein_coding	FCAMR	2	OTTHUMG00000036579.5	chr1	HAVANA	gene	206957965	206970625	-	-4.49399	-3.05069	-5.24717	0.000389014	0.0594163	0.442659
ENSG00000295054.1	lncRNA	ENSG00000295054	2	NA	chr11	HAVANA	gene	46675222	46677131	+	-2.70322	-1.38149	-5.23558	0.0003955	0.0594778	0.437735
ENSG00000200847.1	misc_RNA	Y_RNA	3	NA	chr7	ENSEMBL	gene	23491792	23491893	-	-3.22478	-4.08461	-5.30408	0.000358762	0.0583989	0.42105
ENSG00000248923.1	processed_pseudogene	MTND5P11	2	OTTHUMG00000163063.1	chr5	HAVANA	gene	134924648	134926459	-	-3.67083	-0.982355	-5.20425	0.000413634	0.0602126	0.410777
ENSG00000260671.2	lncRNA	ENSG00000260671	2	OTTHUMG00000176381.2	chr16	HAVANA	gene	87739771	87747706	-	-1.73984	0.581657	-5.21089	0.000409716	0.0602126	0.406692
ENSG00000247193.5	lncRNA	ENSG00000247193	2	OTTHUMG00000160372.2	chr4	HAVANA	gene	36244063	36274222	+	-3.25078	-3.87137	-5.27729	0.000372674	0.0583989	0.406464
ENSG00000300099.1	lncRNA	ENSG00000300099	2	NA	chr3	HAVANA	gene	38024656	38036310	+	-2.13594	-1.6262	-5.20972	0.000410403	0.0602126	0.395707
ENSG00000211459.2	Mt_rRNA	MT-RNR1	3	NA	chrM	ENSEMBL	gene	648	1601	+	-3.87297	8.74615	-5.45738	0.000289128	0.0536136	0.388091
ENSG00000229622.1	processed_pseudogene	MTND5P2	2	OTTHUMG00000017222.1	chr13	HAVANA	gene	95692538	95693972	+	-2.32525	-0.586984	-5.18517	0.000425105	0.060445	0.384763
ENSG00000278981.1	lncRNA	ENSG00000278981	2	OTTHUMG00000189144.1	chr4	HAVANA	gene	154235980	154237598	+	5.12303	-1.19822	5.33353	0.000344105	0.0580734	0.367067
ENSG00000267320.5	lncRNA	ENSG00000267320	2	OTTHUMG00000180782.1	chr19	HAVANA	gene	28316705	28386204	-	-3.53171	-4.03952	-5.24679	0.000389224	0.0594163	0.365535
ENSG00000142945.13	protein_coding	KIF2C	2	OTTHUMG00000008416.7	chr1	HAVANA	gene	44739818	44767767	+	-3.19276	0.801292	-5.19654	0.000418226	0.0602126	0.356375
ENSG00000271657.1	processed_pseudogene	ENSG00000271657	1	OTTHUMG00000184329.1	chr2	HAVANA	gene	62168862	62171163	+	-3.04871	-4.02526	-5.27267	0.000375134	0.0584401	0.355212
ENSG00000112697.17	protein_coding	TMEM30A	2	OTTHUMG00000015050.8	chr6	HAVANA	gene	75252924	75284948	-	1.20348	7.241	5.3492	0.000336567	0.0571775	0.346993
ENSG00000158786.5	protein_coding	PLA2G2F	2	OTTHUMG00000002704.1	chr1	HAVANA	gene	20139323	20150381	+	-4.54682	-1.76654	-5.15566	0.000443525	0.060445	0.34517
ENSG00000303793.1	lncRNA	ENSG00000303793	2	NA	chr11	HAVANA	gene	123405491	123405859	+	-3.51701	-3.35628	-5.20037	0.00041594	0.0602126	0.344998
ENSG00000212607.1	snoRNA	SNORA3B	3	NA	chr11	ENSEMBL	gene	8685439	8685569	+	-2.08949	-0.446639	-5.14077	0.00045315	0.060445	0.32517
ENSG00000134057.15	protein_coding	CCNB1	1	OTTHUMG00000097817.5	chr5	HAVANA	gene	69167135	69178245	+	-2.83853	2.08291	-5.21529	0.000407145	0.0602126	0.324621
ENSG00000154839.10	protein_coding	SKA1	2	OTTHUMG00000132685.8	chr18	HAVANA	gene	50375040	50394168	+	-3.43864	-1.20534	-5.13707	0.000455569	0.060445	0.320552
ENSG00000170684.10	protein_coding	ZNF296	2	OTTHUMG00000181766.2	chr19	HAVANA	gene	45071500	45076478	-	-2.21522	-0.855201	-5.13613	0.000456189	0.060445	0.317948
ENSG00000247627.2	processed_pseudogene	MTND4P12	2	OTTHUMG00000163066.1	chr5	HAVANA	gene	134926660	134928036	-	-3.32435	0.372476	-5.14535	0.000450166	0.060445	0.310123
ENSG00000141447.19	protein_coding	OSBPL1A	1	OTTHUMG00000131944.7	chr18	HAVANA	gene	24162045	24397880	-	2.05117	5.62236	5.23904	0.000393551	0.0594778	0.306246
ENSG00000198542.15	protein_coding	ITGBL1	2	OTTHUMG00000017296.6	chr13	HAVANA	gene	101452593	101720856	+	6.47781	4.35982	5.12196	0.000465614	0.060445	0.300041
ENSG00000152377.15	protein_coding	SPOCK1	2	OTTHUMG00000129157.7	chr5	HAVANA	gene	136975298	137598379	-	4.46361	4.92231	5.13389	0.000457668	0.060445	0.298705
ENSG00000202515.1	vault_RNA	VTRNA1-3	2	NA	chr5	HAVANA	gene	140726158	140726246	+	-2.95133	-4.36031	-5.22539	0.000401303	0.0597587	0.294975
ENSG00000225630.1	unprocessed_pseudogene	MTND2P28	2	OTTHUMG00000002336.1	chr1	HAVANA	gene	629640	630683	+	-4.00631	1.45029	-5.16807	0.000435677	0.060445	0.290171
ENSG00000273142.1	lncRNA	LINC02604	2	OTTHUMG00000186265.1	chr7	HAVANA	gene	66902857	66906297	+	-1.68258	1.86654	-5.16465	0.000437826	0.060445	0.28935
ENSG00000289324.3	lncRNA	ENSG00000289324	2	NA	chr3	HAVANA	gene	125375351	125376687	+	-3.42833	-3.53039	-5.15771	0.00044222	0.060445	0.289257
ENSG00000253490.5	lncRNA	LINC02099	2	OTTHUMG00000163801.2	chr8	HAVANA	gene	29748309	29798492	+	-3.80771	-1.74737	-5.10859	0.000474704	0.060445	0.275517
ENSG00000111732.12	protein_coding	AICDA	2	OTTHUMG00000168676.3	chr12	HAVANA	gene	8602155	8613242	-	-4.0342	-1.92996	-5.10306	0.000478516	0.060445	0.266334
ENSG00000289379.3	lncRNA	ENSG00000289379	2	NA	chr4	HAVANA	gene	77820237	77848048	+	-2.87331	-1.98749	-5.09643	0.00048313	0.060445	0.253691
ENSG00000278865.1	TEC	ENSG00000278865	2	OTTHUMG00000173430.1	chr5	HAVANA	gene	10676096	10676423	-	-3.37597	-4.06847	-5.15826	0.000441869	0.060445	0.251345
ENSG00000072571.20	protein_coding	HMMR	2	OTTHUMG00000130381.8	chr5	HAVANA	gene	163460203	163491941	+	-4.19525	0.807143	-5.12372	0.000464434	0.060445	0.244805
ENSG00000233220.4	lncRNA	PRDM10-DT	2	OTTHUMG00000165763.1	chr11	HAVANA	gene	130002619	130005492	+	-3.5609	-3.31225	-5.12032	0.00046672	0.060445	0.243328
ENSG00000263941.2	misc_RNA	RN7SL32P	3	NA	chr2	ENSEMBL	gene	233205199	233205479	+	-3.7193	-3.81582	-5.13177	0.000459068	0.060445	0.241166
ENSG00000082293.13	protein_coding	COL19A1	2	OTTHUMG00000014987.5	chr6	HAVANA	gene	69866556	70212468	+	-2.7206	3.17036	-5.19686	0.000418035	0.0602126	0.239227
ENSG00000296974.1	lncRNA	ENSG00000296974	2	NA	chr11	HAVANA	gene	128372961	128454169	-	-3.79667	-3.95781	-5.12187	0.000465675	0.060445	0.232287
ENSG00000290577.2	lncRNA	ENSG00000290577	2	NA	chr13	HAVANA	gene	99404684	99423364	-	-3.72077	-3.18571	-5.09383	0.000484952	0.060445	0.232041
ENSG00000286607.2	lncRNA	ENSG00000286607	2	OTTHUMG00000194446.1	chr14	HAVANA	gene	91264850	91266693	+	-3.51065	-2.21222	-5.07738	0.000496656	0.060445	0.22903
ENSG00000121691.7	protein_coding	CAT	2	OTTHUMG00000044353.5	chr11	HAVANA	gene	34438934	34472060	+	1.68303	6.41024	5.22882	0.000399339	0.0597587	0.226286
ENSG00000293420.2	lncRNA	ENSG00000293420	2	NA	chr3	HAVANA	gene	47009752	47013469	+	-3.72968	-2.47936	-5.07608	0.000497598	0.060445	0.223423
ENSG00000255381.1	processed_pseudogene	ENSG00000255381	1	OTTHUMG00000167436.1	chr11	HAVANA	gene	59142121	59142610	-	-3.37916	-3.58442	-5.10903	0.000474398	0.060445	0.215715
ENSG00000123485.12	protein_coding	HJURP	2	OTTHUMG00000059125.12	chr2	HAVANA	gene	233833416	233854566	-	-4.17413	0.213294	-5.08814	0.00048897	0.060445	0.215244
ENSG00000277610.1	snRNA	RNVU1-4	3	NA	chr1	ENSEMBL	gene	120942600	120942763	+	-3.39814	-2.73645	-5.07115	0.00050117	0.060445	0.208966
ENSG00000252947.1	scaRNA	SCARNA1	3	NA	chr1	ENSEMBL	gene	27834401	27834566	+	-4.04204	-2.51035	-5.05731	0.000511349	0.060445	0.207122
ENSG00000280027.1	TEC	ENSG00000280027	2	OTTHUMG00000177941.1	chr16	HAVANA	gene	53391089	53392473	+	-2.91596	-3.20643	-5.0865	0.000490131	0.060445	0.20671
ENSG00000196569.14	protein_coding	LAMA2	2	OTTHUMG00000015545.2	chr6	HAVANA	gene	128883138	129516566	+	5.65727	7.53986	5.12253	0.000465233	0.060445	0.204192
ENSG00000212464.1	snoRNA	SNORA12	3	NA	chr10	ENSEMBL	gene	100237156	100237302	-	-3.52627	0.663531	-5.08994	0.000487696	0.060445	0.20259
ENSG00000296250.1	lncRNA	ENSG00000296250	2	NA	chr15	HAVANA	gene	29636992	29657479	-	-3.40401	-3.95157	-5.10418	0.000477743	0.060445	0.196403
ENSG00000303021.1	lncRNA	ENSG00000303021	2	NA	chr1	HAVANA	gene	101296735	101309155	-	-3.69815	-3.24966	-5.06587	0.000505026	0.060445	0.181842
ENSG00000138182.15	protein_coding	KIF20B	2	OTTHUMG00000018725.2	chr10	HAVANA	gene	89701590	89774939	+	-1.73474	3.95495	-5.17809	0.000429452	0.060445	0.176566
ENSG00000275437.1	lncRNA	ENSG00000275437	2	OTTHUMG00000186989.1	chr20	HAVANA	gene	62402236	62405935	-	-1.73329	0.887229	-5.04925	0.000517381	0.060445	0.175194
ENSG00000269404.7	protein_coding	SPIB	1	OTTHUMG00000183039.3	chr19	HAVANA	gene	50418938	50431314	+	-4.97133	-0.0227886	-5.05706	0.000511532	0.060445	0.163351
ENSG00000100721.11	protein_coding	TCL1A	2	OTTHUMG00000171390.4	chr14	HAVANA	gene	95709947	95714196	-	-5.41841	-0.118349	-5.04667	0.000519328	0.060445	0.161308
ENSG00000011426.11	protein_coding	ANLN	1	OTTHUMG00000023143.8	chr7	HAVANA	gene	36389821	36453791	+	-2.57289	2.81159	-5.12878	0.000461051	0.060445	0.157817
ENSG00000201185.1	rRNA_pseudogene	RNA5SP202	3	NA	chr6	ENSEMBL	gene	4427963	4428081	+	-2.84085	-4.38096	-5.113	0.000471686	0.060445	0.157254
ENSG00000305444.1	lncRNA	ENSG00000305444	2	NA	chr20	HAVANA	gene	32189464	32192548	+	-2.84085	-4.38096	-5.113	0.000471686	0.060445	0.157254
ENSG00000171621.14	protein_coding	SPSB1	2	OTTHUMG00000001279.5	chr1	HAVANA	gene	9292894	9369532	+	1.30381	5.4785	5.15979	0.000440902	0.060445	0.1566
ENSG00000289303.3	lncRNA	ENSG00000289303	2	NA	chr12	HAVANA	gene	6689516	6697086	+	-3.04433	-1.57164	-5.01908	0.000540628	0.0615101	0.15594
ENSG00000256591.5	protein_coding	ENSG00000256591	2	OTTHUMG00000168148.5	chr11	HAVANA	gene	61429220	61485822	+	-2.09108	1.52833	-5.0605	0.000508981	0.060445	0.155232
ENSG00000297048.1	lncRNA	ENSG00000297048	2	NA	chr3	HAVANA	gene	187964160	187967250	+	-3.36017	-4.10871	-5.08711	0.0004897	0.060445	0.154704
ENSG00000262406.3	protein_coding	MMP12	2	OTTHUMG00000165848.4	chr11	HAVANA	gene	102862736	102874982	-	-5.83873	0.401198	-5.0628	0.000507284	0.060445	0.152471
ENSG00000270781.1	processed_pseudogene	ENSG00000270781	1	OTTHUMG00000184905.1	chr17	HAVANA	gene	48899131	48899748	+	-3.14119	-3.73697	-5.07162	0.00050083	0.060445	0.150917
ENSG00000198888.2	protein_coding	MT-ND1	3	NA	chrM	ENSEMBL	gene	3307	4262	+	-3.69537	8.21617	-5.27929	0.000371616	0.0583989	0.142051
ENSG00000198763.3	protein_coding	MT-ND2	3	NA	chrM	ENSEMBL	gene	4470	5511	+	-3.29929	7.77539	-5.26108	0.000381374	0.0591091	0.130571
ENSG00000260519.3	lncRNA	ATP8A1-DT	2	OTTHUMG00000176274.1	chr4	HAVANA	gene	42656320	42689620	+	-3.08027	-3.47075	-5.04026	0.000524196	0.0607788	0.108931
ENSG00000301026.1	lncRNA	ENSG00000301026	2	NA	chr5	HAVANA	gene	141512735	141514123	-	-2.90503	-2.10816	-4.99113	0.000563168	0.0631289	0.107532
ENSG00000138160.7	protein_coding	KIF11	2	OTTHUMG00000018761.3	chr10	HAVANA	gene	92574105	92655395	+	-2.86605	2.37893	-5.07432	0.000498867	0.060445	0.10386
ENSG00000299463.1	lncRNA	ENSG00000299463	2	NA	chr11	HAVANA	gene	67884993	67936030	-	-3.36296	-3.80733	-5.03121	0.000531148	0.0611182	0.103199
ENSG00000289982.2	lncRNA	ENSG00000289982	2	NA	chr2	HAVANA	gene	128090465	128091128	-	-3.19393	-4.29371	-5.049	0.000517569	0.060445	0.101779
ENSG00000304169.1	lncRNA	ENSG00000304169	2	NA	chr1	HAVANA	gene	1069213	1072933	+	-3.01808	-4.33242	-5.04744	0.000518742	0.060445	0.0904564
ENSG00000225945.2	lncRNA	ZFAND3-DT	2	OTTHUMG00000014627.1	chr6	HAVANA	gene	37801348	37819371	-	-3.54193	-2.51937	-4.97323	0.000578128	0.0636318	0.0858158
ENSG00000296523.1	lncRNA	ENSG00000296523	2	NA	chr18	HAVANA	gene	8686870	8691652	+	-3.1805	-4.10473	-5.02097	0.00053914	0.0615101	0.0750773
ENSG00000289172.3	lncRNA	ENSG00000289172	2	NA	chr20	HAVANA	gene	45179818	45191491	+	-3.7906	-3.49867	-4.97899	0.00057327	0.0634877	0.0730458
ENSG00000165507.9	protein_coding	DEPP1	2	OTTHUMG00000018063.4	chr10	HAVANA	gene	44970981	44978809	-	5.31405	7.85187	5.07351	0.000499456	0.060445	0.0684116
ENSG00000196584.4	protein_coding	XRCC2	2	OTTHUMG00000151470.2	chr7	HAVANA	gene	152644776	152676193	-	-3.13185	1.22587	-5.00611	0.000550965	0.0622202	0.0655549
ENSG00000096060.15	protein_coding	FKBP5	2	OTTHUMG00000014576.2	chr6	HAVANA	gene	35573585	35728583	-	1.62613	7.83214	5.16417	0.000438133	0.060445	0.065209
ENSG00000207445.1	snoRNA	SNORD15B	3	NA	chr11	ENSEMBL	gene	75404421	75404566	+	-2.56482	1.66517	-5.01093	0.0005471	0.0620142	0.0639462
ENSG00000274292.3	lncRNA	ENSG00000274292	2	OTTHUMG00000169079.2	chr12	HAVANA	gene	121800797	121803834	+	-2.7258	-1.20772	-4.94603	0.000601683	0.0648406	0.0595289
ENSG00000104760.17	protein_coding	FGL1	1	OTTHUMG00000096989.6	chr8	HAVANA	gene	17864380	17910365	-	6.50087	0.772515	5.03178	0.000530713	0.0611182	0.0594581
ENSG00000301004.1	lncRNA	ENSG00000301004	2	NA	chr2	HAVANA	gene	231671116	231671838	-	-3.33625	-3.86341	-4.98808	0.000565688	0.0631782	0.0543533
ENSG00000268480.4	protein_coding	NFILZ	2	OTTHUMG00000182192.3	chr19	HAVANA	gene	8630633	8681151	+	-3.52618	-3.59607	-4.97747	0.000574547	0.0634877	0.0478782
ENSG00000221869.5	protein_coding	CEBPD	2	OTTHUMG00000162290.3	chr8	HAVANA	gene	47736913	47738164	-	3.27472	6.50654	5.06474	0.000505854	0.060445	0.0470758
ENSG00000180385.11	transcribed_unprocessed_pseudogene	EMC3-AS1	2	OTTHUMG00000155324.2	chr3	HAVANA	gene	9987904	9994331	+	-1.80011	0.241132	-4.94576	0.000601918	0.0648406	0.0464017
ENSG00000152253.9	protein_coding	SPC25	2	OTTHUMG00000132181.10	chr2	HAVANA	gene	168834132	168913371	-	-4.66649	-2.15698	-4.93377	0.000612632	0.0657616	0.0441285
ENSG00000171241.9	protein_coding	SHCBP1	1	OTTHUMG00000132540.5	chr16	HAVANA	gene	46578591	46621379	-	-2.93571	1.43444	-4.97726	0.000574729	0.0634877	0.0322602
ENSG00000288955.2	lncRNA	ENSG00000288955	2	NA	chr1	HAVANA	gene	42924421	42925861	+	-3.46643	-3.72848	-4.9519	0.000596511	0.0647171	0.0212243
ENSG00000164045.12	protein_coding	CDC25A	2	OTTHUMG00000133535.6	chr3	HAVANA	gene	48157146	48188417	-	-2.06905	0.698989	-4.93133	0.000614829	0.065765	0.0131576
ENSG00000171435.15	protein_coding	KSR2	2	OTTHUMG00000169020.4	chr12	HAVANA	gene	117453012	117968990	-	-3.70256	-0.629186	-4.9204	0.000624809	0.066134	0.00480827
ENSG00000243518.1	processed_pseudogene	DTWD1P2	1	OTTHUMG00000158467.1	chr3	HAVANA	gene	155401329	155403399	-	-4.03136	-3.64224	-4.92548	0.000620151	0.0658705	0.00216245
ENSG00000259732.1	lncRNA	ENSG00000259732	2	OTTHUMG00000171943.1	chr15	HAVANA	gene	59121034	59133250	+	-3.61348	-3.99478	-4.95269	0.000595825	0.0647171	-0.00116686
ENSG00000254938.2	lncRNA	ENSG00000254938	2	OTTHUMG00000165809.1	chr11	HAVANA	gene	126893786	126940669	-	-4.02858	-1.89908	-4.89486	0.000648804	0.0668629	-0.00861292
ENSG00000131153.9	protein_coding	GINS2	1	OTTHUMG00000137646.4	chr16	HAVANA	gene	85676198	85690073	-	-3.10332	0.126782	-4.91459	0.000630184	0.0664713	-0.00871113
ENSG00000278002.2	lncRNA	ENSG00000278002	2	OTTHUMG00000186829.1	chr14	HAVANA	gene	49862969	49865508	+	-2.85295	-1.60492	-4.89331	0.00065029	0.0668629	-0.0138145
ENSG00000116171.19	protein_coding	SCP2	1	OTTHUMG00000008936.6	chr1	HAVANA	gene	52927276	53051698	+	1.10555	6.00587	5.05737	0.000511306	0.060445	-0.0260017
ENSG00000279679.1	TEC	ENSG00000279679	2	OTTHUMG00000188122.1	chr5	HAVANA	gene	143375628	143375883	-	-1.88855	0.390668	-4.88642	0.000656941	0.0668629	-0.0353185
ENSG00000239791.3	lncRNA	ENSG00000239791	2	OTTHUMG00000158416.2	chr16	HAVANA	gene	30572039	30583860	+	-2.52216	-2.75611	-4.88866	0.000654776	0.0668629	-0.0415945
ENSG00000260093.2	lncRNA	MSRA-DT	2	OTTHUMG00000163777.1	chr8	HAVANA	gene	9959549	10055041	-	-2.28258	-0.578717	-4.86771	0.000675387	0.0677748	-0.0470107
ENSG00000122729.19	protein_coding	ACO1	2	OTTHUMG00000019740.4	chr9	HAVANA	gene	32384603	32454769	+	1.5498	5.81376	5.02354	0.000537128	0.0615101	-0.0486978
ENSG00000300806.1	lncRNA	ENSG00000300806	2	NA	chr14	HAVANA	gene	91510637	91520914	+	-3.19393	-4.06152	-4.92559	0.000620047	0.0658705	-0.0495971
ENSG00000279663.3	TEC	ENSG00000279663	2	OTTHUMG00000191354.1	chr2	HAVANA	gene	16541690	16545695	-	-4.11655	-3.41769	-4.88575	0.000657592	0.0668629	-0.0557446
ENSG00000124721.18	protein_coding	DNAH8	1	OTTHUMG00000016253.6	chr6	HAVANA	gene	38715311	39030792	+	-3.06734	-0.896239	-4.85912	0.000684042	0.0677748	-0.0631516
ENSG00000210151.2	Mt_tRNA	MT-TS1	3	NA	chrM	ENSEMBL	gene	7446	7514	-	-4.76108	-1.01969	-4.85447	0.000688774	0.0677748	-0.0705958
ENSG00000265527.1	miRNA	MIR5690	3	NA	chr6	ENSEMBL	gene	35664717	35664789	-	2.49379	1.4342	4.84858	0.000694814	0.0677748	-0.0720997
ENSG00000287070.1	lncRNA	ENSG00000287070	2	OTTHUMG00000193888.1	chr9	HAVANA	gene	97921590	97922181	-	-3.65853	-2.20001	-4.85077	0.000692559	0.0677748	-0.0741835
ENSG00000298543.1	lncRNA	ENSG00000298543	2	NA	chr1	HAVANA	gene	116466202	116574990	+	-3.17416	-3.72892	-4.88857	0.00065486	0.0668629	-0.0755528
ENSG00000109805.10	protein_coding	NCAPG	2	OTTHUMG00000128539.4	chr4	HAVANA	gene	17810979	17844865	+	-3.73692	1.20613	-4.90446	0.000639668	0.0668629	-0.0900462
ENSG00000271013.1	transcribed_processed_pseudogene	LRRC37A9P	2	OTTHUMG00000188398.1	chr17	HAVANA	gene	35912635	35918010	-	-3.74099	-3.05111	-4.84293	0.000700667	0.0677748	-0.0917629
ENSG00000117122.14	protein_coding	MFAP2	2	OTTHUMG00000002290.2	chr1	HAVANA	gene	16974502	16980632	-	4.79646	2.99944	4.83413	0.000709884	0.0677748	-0.0921656
ENSG00000263167.1	lncRNA	ENSG00000263167	2	OTTHUMG00000177817.1	chr17	HAVANA	gene	81135771	81136256	+	-3.16656	-3.67779	-4.86528	0.000677825	0.0677748	-0.0937118
ENSG00000296220.1	lncRNA	ENSG00000296220	2	NA	chr17	HAVANA	gene	60392546	60392988	+	-3.01618	-4.13522	-4.88522	0.000658108	0.0668629	-0.0996366
ENSG00000245261.1	lncRNA	ENSG00000245261	2	OTTHUMG00000159928.1	chr6	HAVANA	gene	43213801	43223860	-	-3.54002	-1.68077	-4.82485	0.000719752	0.0677748	-0.104889
ENSG00000261449.2	lncRNA	ENSG00000261449	2	OTTHUMG00000173375.1	chr8	HAVANA	gene	42141999	42152763	-	-3.28393	-3.69843	-4.85878	0.000684382	0.0677748	-0.107717
ENSG00000169122.12	protein_coding	FAM110B	2	OTTHUMG00000164282.2	chr8	HAVANA	gene	57994523	58204279	+	3.38764	3.19808	4.82739	0.000717032	0.0677748	-0.110702
ENSG00000305959.1	lncRNA	ENSG00000305959	2	NA	chr16	HAVANA	gene	807993	809906	+	-2.58018	-1.14576	-4.81958	0.000725411	0.0677748	-0.113961
ENSG00000138028.17	protein_coding	CGREF1	2	OTTHUMG00000152009.4	chr2	HAVANA	gene	27098889	27119128	-	4.83639	1.60048	4.8374	0.000706448	0.0677748	-0.114452
ENSG00000090889.12	protein_coding	KIF4A	2	OTTHUMG00000021775.2	chrX	HAVANA	gene	70290104	70420886	+	-3.48085	0.743821	-4.87882	0.000664367	0.0672738	-0.124497
ENSG00000308689.1	lncRNA	ENSG00000308689	2	NA	chr5	HAVANA	gene	138490680	138505824	+	-3.33983	-1.76161	-4.80136	0.000745365	0.0678246	-0.137107
ENSG00000289865.2	lncRNA	ENSG00000289865	2	NA	chr4	HAVANA	gene	10117010	10119479	+	-3.81874	-2.33752	-4.80218	0.000744451	0.0678246	-0.137328
ENSG00000206756.1	misc_RNA	Y_RNA	3	NA	chr10	ENSEMBL	gene	74551392	74551493	+	-2.51269	-1.88959	-4.80294	0.000743609	0.0678246	-0.140117
ENSG00000198848.13	protein_coding	CES1	1	OTTHUMG00000176718.4	chr16	HAVANA	gene	55802851	55833337	-	3.964	3.32047	4.80962	0.000736247	0.0677748	-0.145125
ENSG00000137312.15	protein_coding	FLOT1	2	OTTHUMG00000031151.10	chr6	HAVANA	gene	30727709	30742732	-	1.15062	6.56809	4.99468	0.000560251	0.0630345	-0.14622
ENSG00000261251.2	lncRNA	EFCAB6-DT	2	OTTHUMG00000172728.1	chr22	HAVANA	gene	43811869	43817906	+	-2.83369	-1.72208	-4.79414	0.000753434	0.0680286	-0.148589
ENSG00000142731.11	protein_coding	PLK4	1	OTTHUMG00000133301.7	chr4	HAVANA	gene	127880893	127899224	+	-2.07654	1.83686	-4.86898	0.000674123	0.0677748	-0.148663
ENSG00000092470.12	protein_coding	WDR76	1	OTTHUMG00000060143.12	chr15	HAVANA	gene	43826980	43868412	+	-1.50405	2.69697	-4.89483	0.000648827	0.0668629	-0.151543
ENSG00000279474.1	TEC	ENSG00000279474	2	OTTHUMG00000180262.1	chr18	HAVANA	gene	79144752	79146918	+	-2.10526	-0.526775	-4.78958	0.000758583	0.0680286	-0.155905
ENSG00000092853.14	protein_coding	CLSPN	2	OTTHUMG00000004168.7	chr1	HAVANA	gene	35720218	35769978	-	-3.46164	1.36823	-4.86078	0.00068236	0.0677748	-0.159668
ENSG00000276272.1	lncRNA	ENSG00000276272	2	OTTHUMG00000187926.1	chr12	HAVANA	gene	56411944	56413190	-	-3.30879	-3.75897	-4.81131	0.000734403	0.0677748	-0.163615
ENSG00000260651.1	lncRNA	ENSG00000260651	2	OTTHUMG00000176287.1	chr4	HAVANA	gene	102500841	102501319	-	-3.25965	-4.06847	-4.82076	0.000724137	0.0677748	-0.167091
ENSG00000141504.12	protein_coding	SAT2	2	OTTHUMG00000108152.4	chr17	HAVANA	gene	7626234	7627876	-	1.32927	4.59296	4.88969	0.000653775	0.0668629	-0.170236
ENSG00000258717.2	lncRNA	ENSG00000258717	2	OTTHUMG00000171593.1	chr14	HAVANA	gene	100675621	100698825	-	-3.09637	-3.87652	-4.82245	0.000722318	0.0677748	-0.172828
ENSG00000173905.9	protein_coding	GOLIM4	1	OTTHUMG00000158554.3	chr3	HAVANA	gene	168008689	168095924	-	1.12075	6.21302	4.96648	0.000583878	0.0640327	-0.172982
ENSG00000301590.1	lncRNA	ENSG00000301590	2	NA	chr1	HAVANA	gene	203289758	203290441	+	-3.67134	-4.18953	-4.80971	0.000736146	0.0677748	-0.174423
ENSG00000306607.1	lncRNA	ENSG00000306607	2	NA	chr19	HAVANA	gene	51123737	51140653	-	-3.81927	-3.60668	-4.78865	0.000759627	0.0680286	-0.17902
ENSG00000158747.15	protein_coding	NBL1	1	OTTHUMG00000002700.7	chr1	HAVANA	gene	19596979	19658456	+	3.45739	5.89117	4.88939	0.000654067	0.0668629	-0.179155
ENSG00000024526.17	protein_coding	DEPDC1	2	OTTHUMG00000009212.5	chr1	HAVANA	gene	68474152	68497221	-	-4.63808	-0.579231	-4.78572	0.000762962	0.0680286	-0.183352
ENSG00000228956.10	lncRNA	SATB1-AS1	2	OTTHUMG00000155346.8	chr3	HAVANA	gene	18445024	18923280	+	-2.90597	0.518407	-4.80104	0.000745718	0.0678246	-0.186734
ENSG00000112029.10	protein_coding	FBXO5	2	OTTHUMG00000015854.3	chr6	HAVANA	gene	152970519	152983579	-	-1.67587	1.99959	-4.83435	0.000709652	0.0677748	-0.192676
ENSG00000288872.2	lncRNA	ENSG00000288872	2	NA	chr15	HAVANA	gene	92877530	92882393	-	-3.38892	-3.74292	-4.78686	0.000761661	0.0680286	-0.192815
ENSG00000108602.18	protein_coding	ALDH3A1	2	OTTHUMG00000059469.12	chr17	HAVANA	gene	19737984	19748943	-	3.32979	-1.65601	4.83788	0.000705941	0.0677748	-0.208947
ENSG00000126247.11	protein_coding	CAPNS1	2	OTTHUMG00000160811.10	chr19	HAVANA	gene	36139953	36150353	+	1.22386	6.81943	4.95873	0.000590564	0.0645329	-0.209256
ENSG00000207475.1	snoRNA	SNORA80E	3	NA	chr1	ENSEMBL	gene	155919909	155920045	-	-2.4265	-1.02609	-4.74075	0.000816057	0.0695092	-0.221219
ENSG00000156509.14	protein_coding	FBXO43	2	OTTHUMG00000164803.3	chr8	HAVANA	gene	100133351	100145817	-	-3.08677	-1.8282	-4.73731	0.000820281	0.0695092	-0.225592
ENSG00000174871.11	protein_coding	CNIH2	2	OTTHUMG00000166919.2	chr11	HAVANA	gene	66278175	66285301	+	-2.94371	-2.4168	-4.7438	0.000812338	0.0695092	-0.22869
ENSG00000279301.5	protein_coding	OR2T11	2	OTTHUMG00000040384.4	chr1	HAVANA	gene	248623557	248635091	-	-4.15046	-3.21137	-4.73982	0.000817198	0.0695092	-0.229988
ENSG00000288744.1	lncRNA	ENSG00000288744	2	NA	chr12	HAVANA	gene	103965893	103966794	+	-2.08564	-0.0788145	-4.7358	0.000822139	0.0695092	-0.240715
ENSG00000241959.3	misc_RNA	RN7SL76P	3	NA	chr7	ENSEMBL	gene	151464650	151464938	-	-3.15817	-3.89685	-4.75924	0.000793772	0.0695092	-0.242118
ENSG00000294270.1	lncRNA	ENSG00000294270	2	NA	chr17	HAVANA	gene	39754553	39756143	+	-3.40726	-3.52342	-4.74156	0.000815067	0.0695092	-0.242643
ENSG00000238987.1	snRNA	RNU7-133P	3	NA	chr6	ENSEMBL	gene	14156462	14156523	+	-4.57668	-3.05574	-4.72937	0.000830108	0.0695092	-0.243939
ENSG00000279977.1	TEC	ENSG00000279977	2	OTTHUMG00000182435.1	chr19	HAVANA	gene	16610374	16612203	-	-2.15567	0.87369	-4.75384	0.000800206	0.0695092	-0.248624
ENSG00000143228.13	protein_coding	NUF2	1	OTTHUMG00000034275.4	chr1	HAVANA	gene	163266576	163355764	+	-3.59393	-0.00856993	-4.75712	0.000796288	0.0695092	-0.249405
ENSG00000254674.1	unprocessed_pseudogene	OR4A42P	2	OTTHUMG00000166606.1	chr11	HAVANA	gene	48610063	48611000	+	-3.08485	-3.90998	-4.75008	0.00080473	0.0695092	-0.256158
ENSG00000271394.1	misc_RNA	7SK	3	NA	chr17	ENSEMBL	gene	35889558	35889804	+	-3.08485	-3.90998	-4.75008	0.00080473	0.0695092	-0.256158
ENSG00000117650.13	protein_coding	NEK2	2	OTTHUMG00000037121.3	chr1	HAVANA	gene	211658657	211675630	-	-3.94116	-0.667725	-4.73649	0.000821289	0.0695092	-0.258744
ENSG00000304875.1	lncRNA	ENSG00000304875	2	NA	chr21	HAVANA	gene	43177207	43194427	+	-3.08693	-3.46518	-4.73432	0.000823966	0.0695092	-0.265748
ENSG00000175600.16	protein_coding	SUGCT	1	OTTHUMG00000155094.6	chr7	HAVANA	gene	40135005	40860763	+	2.85944	2.29948	4.71237	0.000851578	0.0695092	-0.271862
ENSG00000125245.14	protein_coding	GPR18	2	OTTHUMG00000017266.2	chr13	HAVANA	gene	99254732	99261744	-	-4.68562	-0.595382	-4.71952	0.000842481	0.0695092	-0.276642
ENSG00000139220.17	protein_coding	PPFIA2	2	OTTHUMG00000170181.5	chr12	HAVANA	gene	81257975	81759553	-	6.83873	2.22697	4.71825	0.000844091	0.0695092	-0.277804
ENSG00000244921.2	processed_pseudogene	MTCYBP18	2	OTTHUMG00000163073.1	chr5	HAVANA	gene	134923303	134924049	-	-3.1399	-3.88741	-4.73021	0.000829063	0.0695092	-0.277943
ENSG00000165066.13	protein_coding	NKX6-3	1	OTTHUMG00000164083.4	chr8	HAVANA	gene	41645177	41650817	-	-3.21695	-3.87137	-4.72748	0.000832472	0.0695092	-0.278917
ENSG00000118194.22	protein_coding	TNNT2	2	OTTHUMG00000035733.16	chr1	HAVANA	gene	201359008	201377764	-	-3.67566	0.432832	-4.74699	0.000808468	0.0695092	-0.282536
ENSG00000308616.1	lncRNA	ENSG00000308616	2	NA	chr19	HAVANA	gene	13843046	13845136	+	-3.47506	-3.78972	-4.7188	0.000843393	0.0695092	-0.290008
ENSG00000163808.17	protein_coding	KIF15	2	OTTHUMG00000156307.8	chr3	HAVANA	gene	44761721	44873376	+	-2.3917	1.89457	-4.77845	0.000771294	0.0685098	-0.290633
ENSG00000288882.2	lncRNA	ENSG00000288882	2	NA	chr7	HAVANA	gene	142716831	142719234	+	-3.42434	-3.78323	-4.7168	0.000845937	0.0695092	-0.291353
ENSG00000274210.1	snRNA	RNVU1-27	3	NA	chr1	ENSEMBL	gene	148522601	148522765	+	-4.13118	-1.3876	-4.68775	0.000883736	0.0707898	-0.29707
ENSG00000138778.14	protein_coding	CENPE	2	OTTHUMG00000160980.9	chr4	HAVANA	gene	103105349	103198445	-	-2.48291	3.29705	-4.83756	0.000706277	0.0677748	-0.304747
ENSG00000298199.1	lncRNA	ENSG00000298199	2	NA	chr13	HAVANA	gene	42991894	42993229	+	-3.26098	-4.06847	-4.71089	0.000853477	0.0695092	-0.30773
ENSG00000305683.1	lncRNA	ENSG00000305683	2	NA	chr9	HAVANA	gene	136884725	136886254	-	-3.19078	-3.26366	-4.68641	0.000885514	0.0707898	-0.310893
ENSG00000132386.11	protein_coding	SERPINF1	1	OTTHUMG00000090571.7	chr17	HAVANA	gene	1762029	1777565	+	3.78003	6.78003	4.81529	0.000730063	0.0677748	-0.311931
ENSG00000100453.14	protein_coding	GZMB	1	OTTHUMG00000029369.6	chr14	HAVANA	gene	24630954	24634267	-	-3.052	0.690862	-4.7198	0.000842123	0.0695092	-0.312455
ENSG00000151718.16	protein_coding	WWC2	1	OTTHUMG00000150685.4	chr4	HAVANA	gene	183099257	183320777	+	2.20015	5.56496	4.82157	0.000723266	0.0677748	-0.313066
ENSG00000075218.19	protein_coding	GTSE1	2	OTTHUMG00000150486.4	chr22	HAVANA	gene	46296870	46330810	+	-3.43215	0.538432	-4.72775	0.000832131	0.0695092	-0.317819
ENSG00000300524.1	lncRNA	ENSG00000300524	2	NA	chr13	HAVANA	gene	109785652	109788218	+	3.61325	-0.249003	4.70611	0.000859634	0.0698234	-0.322469
ENSG00000269929.7	lncRNA	MIRLET7A1HG	2	OTTHUMG00000184012.4	chr9	HAVANA	gene	94166258	94200905	+	-1.3594	4.05833	-4.83196	0.000712175	0.0677748	-0.323417
ENSG00000258441.1	lncRNA	LINC00641	2	OTTHUMG00000170756.1	chr14	HAVANA	gene	21200079	21206900	-	-2.0905	4.39452	-4.85166	0.000691649	0.0677748	-0.326664
ENSG00000137507.11	protein_coding	LRRC32	1	OTTHUMG00000133687.4	chr11	HAVANA	gene	76657524	76670747	-	3.35255	6.19948	4.79815	0.000748946	0.0679149	-0.328256
ENSG00000260774.1	lncRNA	ENSG00000260774	2	OTTHUMG00000161585.1	chr5	HAVANA	gene	213898	217279	-	-2.98546	-0.139126	-4.68255	0.000890681	0.071016	-0.330048
ENSG00000266215.1	miRNA	MIR3167	3	NA	chr11	ENSEMBL	gene	126988458	126988542	-	-3.29919	-3.49034	-4.67631	0.000899104	0.0710769	-0.330048
ENSG00000149782.13	protein_coding	PLCB3	2	OTTHUMG00000167816.1	chr11	HAVANA	gene	64251530	64269150	+	1.4031	5.12741	4.81705	0.000728148	0.0677748	-0.334184
ENSG00000259579.2	lncRNA	ENSG00000259579	2	OTTHUMG00000172376.1	chr15	HAVANA	gene	100716028	100830966	+	-2.85043	-0.447869	-4.67265	0.000904092	0.0710769	-0.340101
ENSG00000279796.1	TEC	ENSG00000279796	2	OTTHUMG00000176203.1	chr10	HAVANA	gene	114424445	114427398	-	-3.80427	-2.60291	-4.65591	0.000927244	0.071104	-0.340916
ENSG00000291024.2	lncRNA	ENSG00000291024	2	NA	chr2	HAVANA	gene	94811046	94947341	-	-3.33581	-3.1286	-4.66484	0.000914811	0.0710769	-0.343199
ENSG00000257470.3	lncRNA	ENSG00000257470	2	OTTHUMG00000170122.3	chr12	HAVANA	gene	96985191	97212817	+	-3.40389	-3.3681	-4.66146	0.000919489	0.0710769	-0.344792
ENSG00000272980.5	protein_coding	ENSG00000272980	2	OTTHUMG00000185866.1	chr6	HAVANA	gene	166999336	167139138	+	-2.996	-3.39705	-4.65868	0.00092336	0.0710769	-0.354096
ENSG00000296392.1	lncRNA	ENSG00000296392	2	NA	chr12	HAVANA	gene	132596110	132602049	+	-3.54046	-3.64368	-4.65824	0.000923983	0.0710769	-0.355068
ENSG00000168938.6	protein_coding	PPIC	2	OTTHUMG00000128921.3	chr5	HAVANA	gene	123023250	123036725	-	1.92203	4.29018	4.73382	0.00082459	0.0695092	-0.359972
ENSG00000257342.1	lncRNA	ENSG00000257342	2	OTTHUMG00000170379.1	chr12	HAVANA	gene	57694132	57721510	-	-3.08764	-3.90998	-4.66887	0.000909267	0.0710769	-0.36104
ENSG00000289854.2	lncRNA	ENSG00000289854	2	NA	chr12	HAVANA	gene	54347532	54359686	-	-4.30793	-2.59761	-4.63897	0.000951307	0.0718184	-0.362683
ENSG00000285163.2	lncRNA	ENSG00000285163	2	OTTHUMG00000192582.1	chr16	HAVANA	gene	85924984	85948954	+	-3.51684	-3.45215	-4.64872	0.000937378	0.0714572	-0.363332
ENSG00000259003.4	lncRNA	ENSG00000259003	1	OTTHUMG00000170968.2	chr14	HAVANA	gene	22556569	22559803	+	-3.65732	-3.55686	-4.65449	0.000929235	0.071104	-0.363609
ENSG00000291086.2	lncRNA	LGALS17A	2	NA	chr19	HAVANA	gene	39671807	39696913	+	-2.78508	-2.85008	-4.64676	0.000940156	0.0714572	-0.365543
ENSG00000276216.2	lncRNA	ENSG00000276216	2	OTTHUMG00000188659.1	chr1	HAVANA	gene	145281115	145291294	+	-3.52455	-0.489832	-4.64475	0.000943018	0.0714572	-0.370369
ENSG00000169894.18	protein_coding	MUC3A	2	OTTHUMG00000157038.6	chr7	HAVANA	gene	100949534	100968347	+	-2.9002	1.48541	-4.71273	0.000851122	0.0695092	-0.371144
ENSG00000263740.2	misc_RNA	RN7SL4P	3	NA	chr3	ENSEMBL	gene	15738515	15738809	+	-2.31235	4.36844	-4.82195	0.000722857	0.0677748	-0.382117
ENSG00000235629.2	lncRNA	LINC02922	1	OTTHUMG00000155547.1	chr3	HAVANA	gene	14648194	14651505	-	-3.76025	-3.36603	-4.63426	0.000958108	0.0720431	-0.383015
ENSG00000287584.1	lncRNA	ENSG00000287584	2	OTTHUMG00000195216.1	chr7	HAVANA	gene	39621253	39623201	-	-3.66819	-2.67199	-4.625	0.000971647	0.0721679	-0.383894
ENSG00000302174.1	lncRNA	ENSG00000302174	2	NA	chr17	HAVANA	gene	75831249	75833429	+	-3.07248	-4.17392	-4.66183	0.000918974	0.0710769	-0.38898
ENSG00000224652.5	lncRNA	LINC00885	1	OTTHUMG00000155713.9	chr3	HAVANA	gene	196141940	196193538	+	-3.58374	-2.78137	-4.6257	0.000970623	0.0721679	-0.390199
ENSG00000007968.7	protein_coding	E2F2	2	OTTHUMG00000003223.2	chr1	HAVANA	gene	23506438	23531233	-	-3.469	0.637866	-4.67995	0.000894183	0.0710769	-0.39743
ENSG00000120594.17	protein_coding	PLXDC2	2	OTTHUMG00000017781.6	chr10	HAVANA	gene	19816239	20289856	+	2.25082	8.04025	4.8519	0.000691405	0.0677748	-0.406899
ENSG00000236168.1	unprocessed_pseudogene	ENSG00000236168	2	OTTHUMG00000032094.2	chr20	HAVANA	gene	23980585	23980734	-	-3.19651	-3.99027	-4.63183	0.000961654	0.0721312	-0.40933
ENSG00000307645.1	lncRNA	ENSG00000307645	2	NA	chr2	HAVANA	gene	88002587	88016780	-	-3.67485	-3.72562	-4.61364	0.000988538	0.0730652	-0.419505
ENSG00000185924.7	protein_coding	RTN4RL1	2	OTTHUMG00000180184.3	chr17	HAVANA	gene	1934677	2025334	-	5.20526	0.342928	4.63796	0.000952756	0.0718184	-0.424417
ENSG00000119969.16	protein_coding	HELLS	1	OTTHUMG00000018793.3	chr10	HAVANA	gene	94545329	94613905	+	-2.37347	3.94805	-4.78513	0.000763637	0.0680286	-0.428062
ENSG00000262202.5	lncRNA	ENSG00000262202	2	OTTHUMG00000178158.2	chr17	HAVANA	gene	19111680	19190245	-	-3.8629	-0.219711	-4.60954	0.000994704	0.0731649	-0.429011
ENSG00000274400.1	lncRNA	ENSG00000274400	2	OTTHUMG00000186537.1	chr18	HAVANA	gene	35144942	35145417	+	-3.94343	-3.63322	-4.60145	0.001007	0.0735353	-0.435124
ENSG00000307898.1	lncRNA	ENSG00000307898	2	NA	chr8	HAVANA	gene	60903386	60910860	-	-3.58601	-3.59096	-4.59676	0.0010142	0.0738837	-0.435389
ENSG00000247151.8	lncRNA	CSTF3-DT	2	OTTHUMG00000166243.2	chr11	HAVANA	gene	33161544	33252611	+	-2.72192	-1.69743	-4.58371	0.00103454	0.0743469	-0.439279
ENSG00000151376.19	protein_coding	ME3	2	OTTHUMG00000167217.4	chr11	HAVANA	gene	86441108	86672636	-	1.55489	4.7593	4.71238	0.000851565	0.0695092	-0.445961
ENSG00000158477.7	protein_coding	CD1A	2	OTTHUMG00000017512.3	chr1	HAVANA	gene	158254424	158258269	+	-4.19259	-2.57288	-4.57861	0.0010426	0.0745225	-0.446738
ENSG00000291224.2	lncRNA	ENSG00000291224	2	NA	chr3	HAVANA	gene	9986882	10007004	+	-1.29671	2.70842	-4.69344	0.000876184	0.0706014	-0.453152
ENSG00000125285.6	protein_coding	SOX21	2	OTTHUMG00000017209.5	chr13	HAVANA	gene	94709622	94712545	-	-3.03786	-4.11702	-4.60419	0.00100283	0.0734068	-0.453848
ENSG00000264720.3	miRNA	MIR3117	3	NA	chr1	ENSEMBL	gene	66628440	66628517	+	3.7397	-1.47004	4.62632	0.00096971	0.0721679	-0.464995
ENSG00000264922.1	miRNA	MIR4540	3	NA	chr9	ENSEMBL	gene	36864254	36864308	-	-3.79136	-3.21092	-4.56286	0.00106793	0.0750962	-0.472509
ENSG00000265368.1	miRNA	MIR4476	3	NA	chr9	ENSEMBL	gene	36893462	36893531	-	-3.19852	-3.99027	-4.58326	0.00103525	0.0743469	-0.472921
ENSG00000286017.1	lncRNA	ENSG00000286017	2	OTTHUMG00000192971.1	chr3	HAVANA	gene	196973709	196979197	+	3.11335	-1.98887	4.62568	0.000970658	0.0721679	-0.473067
ENSG00000170312.17	protein_coding	CDK1	2	OTTHUMG00000018290.6	chr10	HAVANA	gene	60778331	60794852	+	-2.34704	1.85987	-4.65808	0.000924201	0.0710769	-0.47558
ENSG00000102384.14	protein_coding	CENPI	2	OTTHUMG00000022018.2	chrX	HAVANA	gene	101098188	101166126	+	-1.81095	2.24168	-4.66818	0.000910209	0.0710769	-0.478223
ENSG00000263884.3	lncRNA	THOC1-DT	2	OTTHUMG00000178215.1	chr18	HAVANA	gene	267616	293040	+	-3.08544	-2.33157	-4.55554	0.00107991	0.0754855	-0.478743
ENSG00000208018.1	miRNA	MIR645	3	NA	chr20	ENSEMBL	gene	50585786	50585879	+	-3.72198	-2.15176	-4.55255	0.00108485	0.0754855	-0.482866
ENSG00000253190.5	lncRNA	ENSG00000253190	1	OTTHUMG00000164472.11	chr8	HAVANA	gene	66112667	66126632	+	-3.97965	-2.6287	-4.55192	0.00108589	0.0754855	-0.484331
ENSG00000165617.16	protein_coding	DACT1	1	OTTHUMG00000140324.7	chr14	HAVANA	gene	58633967	58648321	+	3.03853	3.3294	4.58448	0.00103333	0.0743469	-0.48442
ENSG00000204283.5	lncRNA	LINC01973	2	OTTHUMG00000177433.3	chr17	HAVANA	gene	77875344	77893858	-	-3.53499	-3.38393	-4.55417	0.00108217	0.0754855	-0.4884
ENSG00000087245.13	protein_coding	MMP2	1	OTTHUMG00000133202.6	chr16	HAVANA	gene	55389700	55506691	+	5.23003	7.66189	4.69494	0.000874209	0.0706014	-0.491621
ENSG00000291178.2	lncRNA	ENSG00000291178	2	NA	chr7	HAVANA	gene	100275441	100336384	-	-1.33823	3.88994	-4.71392	0.000849603	0.0695092	-0.505399
ENSG00000136732.16	protein_coding	GYPC	1	OTTHUMG00000131464.4	chr2	HAVANA	gene	126656133	126696667	+	1.44213	5.90001	4.72394	0.000836903	0.0695092	-0.507835
ENSG00000180139.11	lncRNA	ACTA2-AS1	2	OTTHUMG00000018703.6	chr10	HAVANA	gene	88932390	88940820	+	-3.02741	-0.010895	-4.5655	0.00106364	0.0750962	-0.512522
ENSG00000137807.16	protein_coding	KIF23	1	OTTHUMG00000172062.8	chr15	HAVANA	gene	69414246	69448427	+	-2.03224	2.46338	-4.66674	0.000912194	0.0710769	-0.514676
ENSG00000103196.12	protein_coding	CRISPLD2	1	OTTHUMG00000137644.7	chr16	HAVANA	gene	84819985	84920768	+	3.61539	6.57818	4.68853	0.00088269	0.0707898	-0.516047
ENSG00000293874.1	lncRNA	ENSG00000293874	2	NA	chr1	HAVANA	gene	117651785	117654633	-	-2.95996	-3.92611	-4.5463	0.00109526	0.0756188	-0.523761
ENSG00000225578.1	lncRNA	NCBP2-AS1	2	OTTHUMG00000155523.1	chr3	HAVANA	gene	196939877	196942534	+	-2.7905	-3.03497	-4.52642	0.00112905	0.0769017	-0.5256
ENSG00000105971.15	protein_coding	CAV2	1	OTTHUMG00000023414.12	chr7	HAVANA	gene	116287380	116508541	+	2.61886	5.45132	4.66171	0.000919147	0.0710769	-0.527872
ENSG00000262074.7	snoRNA	SNORD3B-2	2	OTTHUMG00000178152.3	chr17	HAVANA	gene	19063346	19064136	-	-3.86312	-0.108778	-4.54629	0.00109527	0.0756188	-0.528045
ENSG00000111341.10	protein_coding	MGP	1	OTTHUMG00000168740.2	chr12	HAVANA	gene	14880864	14885857	-	5.9963	7.06822	4.60521	0.00100127	0.0734068	-0.529836
ENSG00000171848.16	protein_coding	RRM2	2	OTTHUMG00000185555.7	chr2	HAVANA	gene	10120698	10211725	+	-3.76508	1.98747	-4.64458	0.000943259	0.0714572	-0.54235
ENSG00000240487.1	processed_pseudogene	ATOSBP1	1	OTTHUMG00000159330.1	chr3	HAVANA	gene	114231398	114233021	-	-3.19957	-3.99631	-4.52804	0.00112624	0.0768832	-0.546523
ENSG00000310056.1	lncRNA	ENSG00000310056	2	NA	chr15	HAVANA	gene	99498904	99509874	-	-2.82113	-3.80002	-4.53234	0.00111888	0.0767873	-0.546716
ENSG00000225756.1	lncRNA	DBH-AS1	2	OTTHUMG00000020877.1	chr9	HAVANA	gene	133654586	133657313	-	-2.5607	0.709872	-4.57368	0.00105045	0.0749077	-0.547091
ENSG00000287812.2	lncRNA	ENSG00000287812	2	OTTHUMG00000195487.1	chr8	HAVANA	gene	22698384	22703776	-	-3.14154	-3.63457	-4.52082	0.00113877	0.0772226	-0.549289
ENSG00000260498.8	lncRNA	ENSG00000260498	2	OTTHUMG00000176390.3	chr16	HAVANA	gene	87766088	87779380	-	-3.16457	-3.09061	-4.50707	0.001163	0.077451	-0.555815
ENSG00000262158.1	unprocessed_pseudogene	MTCO3P24	2	OTTHUMG00000177350.1	chr16	HAVANA	gene	10723836	10724617	-	-2.96086	-3.92611	-4.51777	0.00114409	0.0772337	-0.561401
ENSG00000276043.5	protein_coding	UHRF1	2	OTTHUMG00000180251.5	chr19	HAVANA	gene	4903080	4962154	+	-2.34622	2.09515	-4.61029	0.000993573	0.0731649	-0.564317
ENSG00000288057.2	lncRNA	ENSG00000288057	2	OTTHUMG00000193768.1	chrY	HAVANA	gene	21424028	21456216	-	3.33488	-2.13915	4.548	0.00109242	0.0756188	-0.567798
ENSG00000288728.3	lncRNA	ENSG00000288728	2	NA	chr4	HAVANA	gene	173334752	173336060	+	-3.13855	-3.57847	-4.50858	0.00116031	0.077451	-0.56965
ENSG00000188739.15	protein_coding	RBM34	1	OTTHUMG00000039620.10	chr1	HAVANA	gene	235131183	235161283	-	-1.83318	0.738193	-4.52813	0.0011261	0.0768832	-0.57548
ENSG00000241350.1	transcribed_unprocessed_pseudogene	PMS2P11	2	OTTHUMG00000155730.1	chr7	HAVANA	gene	77011551	77015853	+	-2.92109	-3.94046	-4.50751	0.00116222	0.077451	-0.57688
ENSG00000257017.10	protein_coding	HP	2	OTTHUMG00000173009.7	chr16	HAVANA	gene	72054505	72061055	+	5.99774	3.29151	4.48119	0.00121011	0.077996	-0.583214
ENSG00000211978.2	IG_V_pseudogene	IGHV5-78	2	OTTHUMG00000151873.1	chr14	HAVANA	gene	106851123	106851417	-	-3.61324	-3.05111	-4.48157	0.00120941	0.077996	-0.584986
ENSG00000143476.18	protein_coding	DTL	2	OTTHUMG00000037133.2	chr1	HAVANA	gene	212035553	212107400	+	-2.78028	1.35222	-4.56793	0.00105971	0.075089	-0.585268
ENSG00000279946.1	TEC	ENSG00000279946	2	OTTHUMG00000184618.1	chr1	HAVANA	gene	206541758	206544892	+	-2.08482	-0.464934	-4.49451	0.00118563	0.0778571	-0.588199
ENSG00000300726.1	lncRNA	ENSG00000300726	2	NA	chr20	HAVANA	gene	37287938	37289615	-	-2.80867	-4.17392	-4.50739	0.00116243	0.077451	-0.588468
ENSG00000288741.2	lncRNA	ENSG00000288741	2	NA	chr5	HAVANA	gene	80256190	80258047	+	-2.4596	-0.466774	-4.49395	0.00118664	0.0778571	-0.588523
ENSG00000157557.13	protein_coding	ETS2	2	OTTHUMG00000090769.8	chr21	HAVANA	gene	38805183	38824955	+	1.61974	7.18815	4.71752	0.000845022	0.0695092	-0.590197
ENSG00000111206.13	protein_coding	FOXM1	2	OTTHUMG00000168118.2	chr12	HAVANA	gene	2857680	2877174	-	-4.04217	1.42943	-4.59046	0.00102397	0.0742391	-0.59197
ENSG00000244486.9	protein_coding	SCARF2	2	OTTHUMG00000150779.5	chr22	HAVANA	gene	20424584	20437826	-	3.52519	3.04891	4.49836	0.00117865	0.0776679	-0.5945
ENSG00000260063.2	lncRNA	ENSG00000260063	2	OTTHUMG00000175777.1	chr1	HAVANA	gene	26692132	26695943	-	-1.94794	-0.682438	-4.48025	0.00121187	0.077996	-0.595989
ENSG00000267662.2	lncRNA	TSHZ3-AS1	2	OTTHUMG00000182322.1	chr19	HAVANA	gene	31348590	31427302	+	4.03096	-0.0175886	4.48792	0.00119767	0.077996	-0.601171
ENSG00000290074.2	lncRNA	ENSG00000290074	2	NA	chr1	HAVANA	gene	150579305	150604291	+	-1.76958	-0.389286	-4.47487	0.00122194	0.0783121	-0.601995
ENSG00000285696.1	lncRNA	ENSG00000285696	2	OTTHUMG00000192658.1	chr11	HAVANA	gene	108142458	108150381	-	-1.65087	0.0261725	-4.48833	0.00119691	0.077996	-0.604303
ENSG00000305764.1	lncRNA	ENSG00000305764	2	NA	chr11	HAVANA	gene	118928734	118928931	+	-3.48213	-3.11363	-4.46447	0.00124164	0.078648	-0.613356
ENSG00000047457.14	protein_coding	CP	1	OTTHUMG00000159563.6	chr3	HAVANA	gene	149162410	149221829	-	2.64125	4.53471	4.55724	0.00107712	0.0754855	-0.616785
ENSG00000304156.1	lncRNA	ENSG00000304156	2	NA	chr19	HAVANA	gene	11964439	11965253	-	-3.55209	-3.13536	-4.46068	0.00124889	0.078648	-0.620736
ENSG00000237594.2	lncRNA	TIAM1-AS1	2	OTTHUMG00000186474.1	chr21	HAVANA	gene	31559245	31560487	+	-3.31592	-3.90762	-4.46761	0.00123565	0.078648	-0.62186
ENSG00000135926.15	protein_coding	TMBIM1	2	OTTHUMG00000133105.11	chr2	HAVANA	gene	218274197	218292586	-	1.37723	7.43265	4.70273	0.000864023	0.0699928	-0.622207
ENSG00000110427.17	protein_coding	KIAA1549L	1	OTTHUMG00000150410.8	chr11	HAVANA	gene	33376108	33674102	+	2.81985	0.780142	4.45212	0.00126546	0.0789906	-0.62373
ENSG00000303713.1	lncRNA	ENSG00000303713	2	NA	chr19	HAVANA	gene	1931530	1942101	-	-3.38674	-3.88698	-4.46292	0.0012446	0.078648	-0.626024
ENSG00000306969.1	lncRNA	ENSG00000306969	2	NA	chr5	HAVANA	gene	141921623	141924063	-	-2.68854	-1.41099	-4.44562	0.0012782	0.0794053	-0.635486
ENSG00000289040.1	lncRNA	ENSG00000289040	2	NA	chr12	HAVANA	gene	77723756	77725645	+	3.85382	-0.901525	4.4772	0.00121755	0.0781962	-0.640754
ENSG00000186871.7	protein_coding	ERCC6L	1	OTTHUMG00000021810.4	chrX	HAVANA	gene	72204657	72239027	-	-3.33045	-1.21389	-4.45608	0.00125777	0.0787805	-0.643146
ENSG00000252034.1	misc_RNA	RNY4P37	3	NA	chr18	ENSEMBL	gene	46077004	46077099	-	-2.94917	-4.15327	-4.46349	0.0012435	0.078648	-0.643212
ENSG00000260859.1	lncRNA	ENSG00000260859	2	OTTHUMG00000176783.1	chr16	HAVANA	gene	84828263	84829242	+	4.14472	0.64235	4.44365	0.00128208	0.0794838	-0.649435
ENSG00000177875.5	protein_coding	CCDC184	2	OTTHUMG00000169902.2	chr12	HAVANA	gene	48183644	48185926	+	4.734	-1.33794	4.48642	0.00120044	0.077996	-0.649984
ENSG00000203804.5	lncRNA	ADAMTSL4-AS1	2	OTTHUMG00000034866.2	chr1	HAVANA	gene	150560202	150562115	-	-1.77537	1.55193	-4.51195	0.00115433	0.077451	-0.653552
ENSG00000286808.1	lncRNA	ENSG00000286808	2	OTTHUMG00000195329.1	chr16	HAVANA	gene	22331039	22342938	-	-2.84342	-1.77286	-4.43067	0.00130801	0.0797844	-0.655224
ENSG00000120329.7	protein_coding	SLC25A2	2	OTTHUMG00000129604.5	chr5	HAVANA	gene	141302635	141304049	-	-2.1061	-1.29108	-4.42281	0.00132398	0.0797844	-0.667024
ENSG00000035499.13	protein_coding	DEPDC1B	2	OTTHUMG00000097083.4	chr5	HAVANA	gene	60596912	60700190	-	-3.03376	0.00172178	-4.47318	0.0012251	0.0783499	-0.669269
ENSG00000306233.1	lncRNA	ENSG00000306233	2	NA	chr20	HAVANA	gene	45935400	45936025	+	-3.11949	-2.21355	-4.41911	0.00133158	0.0797844	-0.671339
ENSG00000300728.1	lncRNA	ENSG00000300728	2	NA	chr19	HAVANA	gene	13162870	13218408	+	-2.76101	-1.22757	-4.42931	0.00131076	0.0797844	-0.672084
ENSG00000171320.15	protein_coding	ESCO2	2	OTTHUMG00000163901.3	chr8	HAVANA	gene	27771949	27812640	+	-3.63781	-0.138321	-4.46016	0.00124989	0.078648	-0.672369
ENSG00000242798.2	lncRNA	ENSG00000242798	2	OTTHUMG00000159264.1	chr7	HAVANA	gene	100115214	100127156	-	-3.21069	-3.78972	-4.42708	0.00131528	0.0797844	-0.674772
ENSG00000243562.3	misc_RNA	RN7SL838P	3	NA	chr11	ENSEMBL	gene	440399	440693	-	-2.9505	-3.99478	-4.43574	0.00129782	0.0797678	-0.67983
ENSG00000242689.3	protein_coding	CNTF	2	OTTHUMG00000137476.3	chr11	HAVANA	gene	58622665	58625733	+	-3.19348	-1.32711	-4.41274	0.00134475	0.0800401	-0.681857
ENSG00000274799.1	misc_RNA	Metazoa_SRP	3	NA	chr5	ENSEMBL	gene	148389748	148390029	+	-1.79564	-1.04396	-4.41371	0.00134273	0.0800401	-0.682701
ENSG00000300813.1	lncRNA	ENSG00000300813	2	NA	chr1	HAVANA	gene	62435405	62436258	-	-3.62202	-3.36284	-4.41195	0.00134639	0.0800401	-0.686713
ENSG00000297343.1	lncRNA	ENSG00000297343	2	NA	chrX	HAVANA	gene	48673368	48676410	-	-3.15511	-3.40554	-4.41571	0.00133858	0.0800401	-0.687874
ENSG00000285336.1	lncRNA	ENSG00000285336	2	OTTHUMG00000192437.1	chr3	HAVANA	gene	180707589	180871005	-	5.36158	0.754456	4.42936	0.00131067	0.0797844	-0.687918
ENSG00000227245.2	lncRNA	ENSG00000227245	2	OTTHUMG00000156464.1	chr3	HAVANA	gene	43087463	43090450	+	4.49266	-1.72646	4.45734	0.00125534	0.0787805	-0.689239
ENSG00000300036.1	lncRNA	ENSG00000300036	2	NA	chr12	HAVANA	gene	132428077	132429409	-	-3.10096	-3.77872	-4.42058	0.00132855	0.0797844	-0.691283
ENSG00000070404.10	protein_coding	FSTL3	2	OTTHUMG00000180593.15	chr19	HAVANA	gene	676392	683392	+	3.27642	4.42675	4.48399	0.00120492	0.077996	-0.691675
ENSG00000201098.1	misc_RNA	RNY1	3	NA	chr7	ENSEMBL	gene	148987136	148987248	-	-2.34679	0.675697	-4.44585	0.00127775	0.0794053	-0.696324
ENSG00000262456.1	lncRNA	ENSG00000262456	2	OTTHUMG00000177562.1	chr17	HAVANA	gene	2384847	2386664	+	-2.94329	-4.13766	-4.42069	0.00132833	0.0797844	-0.697778
ENSG00000229851.1	lncRNA	ARSD-AS1	2	OTTHUMG00000021076.1	chrX	HAVANA	gene	2904904	2906081	+	-2.94329	-4.13766	-4.42069	0.00132833	0.0797844	-0.697778
ENSG00000130147.16	protein_coding	SH3BP4	1	OTTHUMG00000133292.5	chr2	HAVANA	gene	234952017	235055714	+	1.55519	4.92298	4.56438	0.00106546	0.0750962	-0.698952
ENSG00000132669.14	protein_coding	RIN2	2	OTTHUMG00000031996.3	chr20	HAVANA	gene	19757606	20002457	+	1.41076	6.25779	4.61929	0.000980101	0.0726183	-0.701154
ENSG00000280181.1	TEC	ENSG00000280181	2	OTTHUMG00000172918.1	chr12	HAVANA	gene	64709458	64710513	+	-3.56831	-2.85601	-4.39721	0.00137744	0.0806151	-0.702636
ENSG00000232811.1	lncRNA	ENSG00000232811	2	OTTHUMG00000034494.1	chr1	HAVANA	gene	110943467	110952848	+	-3.72725	-2.95171	-4.39485	0.00138248	0.0806151	-0.704697
ENSG00000265148.8	lncRNA	TSPOAP1-AS1	2	OTTHUMG00000178924.2	chr17	HAVANA	gene	58324472	58415766	+	-2.78766	1.85593	-4.52078	0.00113884	0.0772226	-0.709696
ENSG00000297673.1	lncRNA	ENSG00000297673	2	NA	chr14	HAVANA	gene	20339359	20342768	-	-2.94329	-3.82067	-4.40292	0.00136532	0.0804544	-0.721391
ENSG00000180210.15	protein_coding	F2	1	OTTHUMG00000150344.4	chr11	HAVANA	gene	46719196	46739506	+	5.42967	-0.965113	4.42588	0.00131773	0.0797844	-0.721945
ENSG00000276791.1	lncRNA	ENSG00000276791	2	OTTHUMG00000177359.2	chr16	HAVANA	gene	2777319	2780568	+	-2.0204	0.10574	-4.40371	0.00136365	0.0804544	-0.722168
ENSG00000308485.1	lncRNA	ENSG00000308485	2	NA	chr17	HAVANA	gene	59786097	59786540	-	-3.03796	-3.81113	-4.39233	0.0013879	0.0806151	-0.723807
ENSG00000293751.1	lncRNA	ENSG00000293751	2	NA	chr17	HAVANA	gene	81861102	81865086	+	-2.04737	1.27176	-4.45168	0.00126633	0.0789906	-0.725731
ENSG00000199390.1	snoRNA	SNORD114-7	3	NA	chr14	ENSEMBL	gene	100963054	100963130	+	3.18428	-2.45871	4.4385	0.00129231	0.0797282	-0.727928
ENSG00000290044.2	lncRNA	ENSG00000290044	2	NA	chr3	HAVANA	gene	14144198	14144540	-	-3.24258	-4.06397	-4.39355	0.00138527	0.0806151	-0.733915
ENSG00000248283.2	processed_pseudogene	CCNL2P1	1	OTTHUMG00000162545.2	chr4	HAVANA	gene	42561457	42562425	-	-1.94472	0.575838	-4.40232	0.0013666	0.0804544	-0.743062
ENSG00000251952.1	snRNA	RNU6-1219P	3	NA	chr22	ENSEMBL	gene	29191697	29191808	-	-2.91252	-3.62924	-4.38137	0.00141168	0.0815283	-0.74556
ENSG00000290109.2	lncRNA	ENSG00000290109	2	NA	chr1	HAVANA	gene	8970490	8971246	-	-3.1356	-3.79767	-4.37387	0.00142818	0.082325	-0.747588
ENSG00000298027.1	lncRNA	ENSG00000298027	2	NA	chr17	HAVANA	gene	75204527	75205394	-	-2.75998	-3.23392	-4.37122	0.00143406	0.0823512	-0.749226
ENSG00000239705.3	lncRNA	HSPA5-DT	2	OTTHUMG00000159480.2	chr9	HAVANA	gene	125241637	125260975	+	-3.32733	-2.57633	-4.36258	0.00145343	0.0828375	-0.750691
ENSG00000307845.1	lncRNA	ENSG00000307845	2	NA	chr3	HAVANA	gene	108222509	108223789	+	-3.13402	-3.44108	-4.36632	0.00144501	0.0828237	-0.754173
ENSG00000260122.1	lncRNA	ENSG00000260122	2	OTTHUMG00000172897.1	chr12	HAVANA	gene	51809705	51810600	-	-3.66003	-2.78639	-4.35912	0.00146125	0.0831245	-0.755385
ENSG00000165072.10	protein_coding	MAMDC2	2	OTTHUMG00000019990.2	chr9	HAVANA	gene	70043848	70226972	+	3.12784	4.28551	4.42308	0.00132344	0.0797844	-0.7621
ENSG00000239569.6	lncRNA	KMT2E-AS1	2	OTTHUMG00000157278.2	chr7	HAVANA	gene	104894628	105014321	-	-1.16153	4.95429	-4.58065	0.00103937	0.0744668	-0.767636
ENSG00000270006.5	lncRNA	C16orf95-DT	2	OTTHUMG00000183879.2	chr16	HAVANA	gene	87317468	87325412	+	-3.24744	-3.21555	-4.34878	0.00148493	0.083846	-0.774361
ENSG00000156052.11	protein_coding	GNAQ	2	OTTHUMG00000020059.3	chr9	HAVANA	gene	77716097	78031811	-	1.11289	6.80677	4.59374	0.00101887	0.0740461	-0.781604
ENSG00000290927.2	lncRNA	ENSG00000290927	2	NA	chr16	HAVANA	gene	31700536	31711986	+	-1.7065	3.33898	-4.51395	0.0011508	0.077451	-0.782338
ENSG00000259396.1	lncRNA	ENSG00000259396	2	OTTHUMG00000172608.1	chr15	HAVANA	gene	41343080	41344225	+	-3.80481	-3.06822	-4.33807	0.00150989	0.0846261	-0.785176
ENSG00000237321.1	lncRNA	ENSG00000237321	2	OTTHUMG00000015498.1	chr6	HAVANA	gene	123823240	123829285	+	3.01907	-2.52916	4.39346	0.00138546	0.0806151	-0.786554
ENSG00000241529.3	misc_RNA	RN7SL767P	3	NA	chr3	ENSEMBL	gene	113632704	113632998	+	-3.26849	-2.93482	-4.33169	0.00152495	0.0848442	-0.794205
ENSG00000136492.10	protein_coding	BRIP1	1	OTTHUMG00000179233.3	chr17	HAVANA	gene	61679139	61863559	-	-2.72647	2.44162	-4.48951	0.00119475	0.077996	-0.798073
ENSG00000268119.9	lncRNA	ENSG00000268119	2	OTTHUMG00000182846.3	chr19	HAVANA	gene	21444241	21464026	-	-3.15636	-1.97755	-4.32826	0.00153311	0.0851425	-0.800059
ENSG00000233551.2	processed_pseudogene	LSM1P1	1	OTTHUMG00000019592.2	chr9	HAVANA	gene	16775573	16775845	-	3.11347	-1.64394	4.35794	0.00146394	0.0831245	-0.802122
ENSG00000307054.1	lncRNA	ENSG00000307054	2	NA	chr19	HAVANA	gene	39403477	39403926	-	-3.95093	-3.50589	-4.3246	0.00154188	0.0854733	-0.804731
ENSG00000101057.16	protein_coding	MYBL2	2	OTTHUMG00000033062.2	chr20	HAVANA	gene	43667019	43716495	+	-4.27791	1.27033	-4.43476	0.00129979	0.0797678	-0.808636
ENSG00000145386.11	protein_coding	CCNA2	2	OTTHUMG00000133072.4	chr4	HAVANA	gene	121816444	121823883	-	-1.47082	2.22844	-4.4377	0.0012939	0.0797282	-0.811864
ENSG00000173432.13	protein_coding	SAA1	2	OTTHUMG00000166147.7	chr11	HAVANA	gene	18266260	18269977	+	8.7577	2.27876	4.34402	0.00149596	0.0841559	-0.812242
ENSG00000309549.1	lncRNA	ENSG00000309549	2	NA	chr7	HAVANA	gene	120270660	120273891	-	3.42425	-1.71351	4.3522	0.00147706	0.0835572	-0.817885
ENSG00000287016.2	lncRNA	ENSG00000287016	2	OTTHUMG00000194339.1	chr10	HAVANA	gene	56361464	56364721	+	-3.45379	-3.57514	-4.31461	0.00156609	0.0860889	-0.821791
ENSG00000295550.1	lncRNA	ENSG00000295550	2	NA	chr6	HAVANA	gene	14712552	14713109	-	-2.76964	-4.22246	-4.33214	0.00152388	0.0848442	-0.825406
ENSG00000310261.1	lncRNA	ENSG00000310261	2	NA	chr2	HAVANA	gene	62229057	62232375	+	-3.2998	-3.01467	-4.30881	0.00158033	0.086189	-0.826131
ENSG00000117322.19	protein_coding	CR2	1	OTTHUMG00000036307.3	chr1	HAVANA	gene	207453024	207489895	+	-4.93482	1.65929	-4.45986	0.00125048	0.078648	-0.827665
ENSG00000073910.23	protein_coding	FRY	2	OTTHUMG00000016696.9	chr13	HAVANA	gene	31846713	32299125	+	2.92608	7.05002	4.53181	0.00111978	0.0767873	-0.828566
ENSG00000209082.1	Mt_tRNA	MT-TL1	3	NA	chrM	ENSEMBL	gene	3230	3304	+	-3.70856	-4.02302	-4.31412	0.00156729	0.0860889	-0.829541
ENSG00000234191.1	lncRNA	LINC01283	2	OTTHUMG00000024097.1	chrX	HAVANA	gene	39401252	39434824	-	-3.04958	-3.60047	-4.3107	0.00157566	0.0860889	-0.830201
ENSG00000104805.17	protein_coding	NUCB1	2	OTTHUMG00000152514.5	chr19	HAVANA	gene	48900050	48923473	+	1.3985	7.31449	4.56985	0.00105661	0.075089	-0.830369
ENSG00000163625.17	protein_coding	WDFY3	2	OTTHUMG00000130424.5	chr4	HAVANA	gene	84668765	84966690	-	1.35463	7.91797	4.58573	0.00103137	0.0743469	-0.831295
ENSG00000305727.1	lncRNA	ENSG00000305727	2	NA	chr15	HAVANA	gene	70099247	70099647	-	-3.18223	-3.92108	-4.31513	0.00156483	0.0860889	-0.833022
ENSG00000183255.12	protein_coding	PTTG1IP	1	OTTHUMG00000090254.2	chr21	HAVANA	gene	44849585	44873903	-	1.54344	7.36728	4.56749	0.00106041	0.075089	-0.833591
ENSG00000300481.1	lncRNA	ENSG00000300481	2	NA	chr1	HAVANA	gene	45687350	45687879	+	-3.37404	-2.93671	-4.30352	0.00159341	0.0863905	-0.835963
ENSG00000198886.2	protein_coding	MT-ND4	3	NA	chrM	ENSEMBL	gene	10760	12137	+	-3.09915	9.70672	-4.65952	0.000922187	0.0710769	-0.836428
ENSG00000287699.2	lncRNA	ENSG00000287699	2	OTTHUMG00000194266.1	chr7	HAVANA	gene	64294504	64371212	-	-2.95057	-3.71287	-4.30202	0.00159715	0.0863905	-0.84513
ENSG00000271936.1	lncRNA	ENSG00000271936	2	OTTHUMG00000185752.1	chr2	HAVANA	gene	24825610	24826717	+	-2.15247	-0.576885	-4.30669	0.00158557	0.0863197	-0.846785
ENSG00000280063.1	TEC	ENSG00000280063	2	OTTHUMG00000177665.1	chr16	HAVANA	gene	4346694	4348648	-	-1.82616	2.16809	-4.41929	0.0013312	0.0797844	-0.84833
ENSG00000267213.5	lncRNA	DPY19L3-DT	2	OTTHUMG00000180221.2	chr19	HAVANA	gene	32347476	32407824	-	-2.02213	-0.128715	-4.31793	0.00155799	0.0860521	-0.848833
ENSG00000213928.10	protein_coding	IRF9	1	OTTHUMG00000028799.5	chr14	HAVANA	gene	24161234	24168043	+	-1.88439	4.00037	-4.50287	0.00117051	0.0774679	-0.850364
ENSG00000279529.3	lncRNA	ENSG00000279529	2	OTTHUMG00000182561.2	chr19	HAVANA	gene	16572548	16578954	+	-1.32612	1.80262	-4.37138	0.00143372	0.0823512	-0.857346
ENSG00000188558.7	protein_coding	OR2G6	2	OTTHUMG00000040462.3	chr1	HAVANA	gene	248508073	248527337	+	-3.77674	-3.30669	-4.2865	0.00163637	0.0864878	-0.858669
ENSG00000164949.8	protein_coding	GEM	2	OTTHUMG00000164392.5	chr8	HAVANA	gene	94249253	94262350	-	2.73143	6.58233	4.50586	0.00116516	0.077451	-0.859798
ENSG00000198695.2	protein_coding	MT-ND6	3	NA	chrM	ENSEMBL	gene	14149	14673	-	-2.69612	4.30852	-4.5014	0.00117316	0.0774745	-0.861313
ENSG00000137869.16	protein_coding	CYP19A1	1	OTTHUMG00000131747.7	chr15	HAVANA	gene	51208057	51338601	-	5.92617	0.416952	4.30158	0.00159824	0.0863905	-0.861369
ENSG00000051180.17	protein_coding	RAD51	1	OTTHUMG00000130067.10	chr15	HAVANA	gene	40694774	40732340	+	-2.72215	-0.0446788	-4.3185	0.00155661	0.0860521	-0.866887
ENSG00000277041.1	unprocessed_pseudogene	ENSG00000277041	2	OTTHUMG00000187895.1	chr16	HAVANA	gene	22537478	22537584	-	-3.1595	-2.75611	-4.27858	0.00165675	0.0872545	-0.869376
ENSG00000258315.5	protein_coding	C17orf49	2	OTTHUMG00000170147.2	chr17	HAVANA	gene	7014495	7017525	+	-2.53152	-1.23032	-4.27651	0.00166213	0.0872545	-0.882121
ENSG00000112742.10	protein_coding	TTK	1	OTTHUMG00000015088.5	chr6	HAVANA	gene	80003887	80042527	+	-3.0091	0.258654	-4.3321	0.00152399	0.0848442	-0.884246
ENSG00000210107.1	Mt_tRNA	MT-TQ	3	NA	chrM	ENSEMBL	gene	4329	4400	-	-3.67865	-0.638987	-4.28671	0.00163582	0.0864878	-0.888851
ENSG00000115163.15	protein_coding	CENPA	2	OTTHUMG00000097073.5	chr2	HAVANA	gene	26764289	26801067	+	-2.34317	-0.506424	-4.28708	0.00163488	0.0864878	-0.892435
ENSG00000213188.3	processed_pseudogene	YBX1P4	1	OTTHUMG00000157256.1	chr7	HAVANA	gene	152128879	152129686	+	-3.02368	-3.38038	-4.2634	0.0016966	0.0872583	-0.896244
ENSG00000210194.1	Mt_tRNA	MT-TE	3	NA	chrM	ENSEMBL	gene	14674	14742	-	-4.1567	-1.76532	-4.26358	0.00169611	0.0872583	-0.896516
ENSG00000274209.7	protein_coding	ANTXRL	2	OTTHUMG00000188318.4	chr10	HAVANA	gene	46286345	46330727	+	-3.40274	-2.2429	-4.2646	0.00169342	0.0872583	-0.897113
ENSG00000284906.3	protein_coding	ENSG00000284906	2	OTTHUMG00000192491.3	chr15	HAVANA	gene	30624548	30773002	+	-3.01619	-2.23761	-4.25839	0.00170997	0.0872583	-0.89825
ENSG00000290318.1	protein_coding	ENSG00000290318	2	NA	chr3	HAVANA	gene	49357176	49412051	-	-2.87197	-3.85072	-4.27304	0.00167119	0.0872545	-0.898663
ENSG00000126787.13	protein_coding	DLGAP5	1	OTTHUMG00000140310.3	chr14	HAVANA	gene	55148112	55191608	-	-3.86881	0.332047	-4.35281	0.00147566	0.0835572	-0.9005
ENSG00000300410.1	lncRNA	ENSG00000300410	2	NA	chr2	HAVANA	gene	242028862	242031956	-	-3.57864	-2.95932	-4.25613	0.00171603	0.0872583	-0.900829
ENSG00000090013.11	protein_coding	BLVRB	1	OTTHUMG00000182593.4	chr19	HAVANA	gene	40447765	40465764	-	1.64371	4.7896	4.40258	0.00136604	0.0804544	-0.905278
ENSG00000300218.1	lncRNA	ENSG00000300218	2	NA	chr2	HAVANA	gene	30164684	30169389	+	-4.01817	-3.16819	-4.25232	0.00172632	0.0872583	-0.90625
ENSG00000289304.3	lncRNA	ENSG00000289304	2	NA	chr6	HAVANA	gene	116568774	116571475	-	-2.99081	-2.84786	-4.25265	0.00172544	0.0872583	-0.906716
ENSG00000256357.2	lncRNA	ENSG00000256357	2	OTTHUMG00000167713.1	chr14	HAVANA	gene	94389639	94464730	+	-3.99903	-2.66394	-4.25365	0.00172274	0.0872583	-0.90966
ENSG00000182902.14	protein_coding	SLC25A18	2	OTTHUMG00000150089.4	chr22	HAVANA	gene	17563450	17590995	+	5.63528	0.536021	4.27179	0.00167445	0.0872545	-0.909971
ENSG00000224610.3	lncRNA	ENSG00000224610	2	OTTHUMG00000024094.1	chrX	HAVANA	gene	39138146	39299811	-	-4.55734	-2.11539	-4.25782	0.0017115	0.0872583	-0.920333
ENSG00000174080.12	protein_coding	CTSF	2	OTTHUMG00000167090.4	chr11	HAVANA	gene	66563464	66568879	-	3.27142	5.1433	4.34694	0.00148919	0.0839306	-0.921526
ENSG00000304794.1	lncRNA	ENSG00000304794	2	NA	chr8	HAVANA	gene	12755848	12756684	+	-2.41471	-2.40099	-4.2409	0.00175754	0.0874234	-0.922517
ENSG00000290387.2	lncRNA	SORD2P	2	NA	chr15	HAVANA	gene	44825744	44884694	-	-2.76757	-1.54121	-4.24476	0.00174691	0.0874234	-0.927595
ENSG00000240869.3	misc_RNA	RN7SL128P	3	NA	chr6	ENSEMBL	gene	20421583	20421887	-	-3.80154	-3.25815	-4.23467	0.0017748	0.0874234	-0.931435
ENSG00000100162.16	protein_coding	CENPM	1	OTTHUMG00000151277.3	chr22	HAVANA	gene	41927514	41947152	-	-4.23407	-0.388957	-4.27464	0.00166699	0.0872545	-0.932527
ENSG00000204420.10	protein_coding	MPIG6B	2	OTTHUMG00000031130.8	chr6	HAVANA	gene	31718594	31726714	+	-3.24505	-3.03068	-4.23426	0.00177595	0.0874234	-0.932587
ENSG00000202470.1	misc_RNA	Y_RNA	3	NA	chr12	ENSEMBL	gene	95275770	95275872	+	-2.55271	-2.09705	-4.23447	0.00177537	0.0874234	-0.933572
ENSG00000093009.11	protein_coding	CDC45	1	OTTHUMG00000150386.3	chr22	HAVANA	gene	19479457	19520612	+	-3.14603	-0.0149948	-4.29347	0.00161862	0.0864878	-0.934857
ENSG00000127124.16	protein_coding	HIVEP3	2	OTTHUMG00000192539.4	chr1	HAVANA	gene	41506365	42035925	-	-1.82946	4.61654	-4.46639	0.00123796	0.078648	-0.934932
ENSG00000280721.2	lncRNA	LINC01943	2	OTTHUMG00000153255.4	chr2	HAVANA	gene	87439522	87459111	-	-2.00981	-0.449136	-4.25642	0.00171525	0.0872583	-0.938318
ENSG00000125347.15	protein_coding	IRF1	2	OTTHUMG00000059497.17	chr5	HAVANA	gene	132440440	132508719	-	-2.73267	5.77452	-4.51793	0.00114382	0.0772337	-0.938456
ENSG00000287494.1	lncRNA	ENSG00000287494	2	OTTHUMG00000194733.1	chr15	HAVANA	gene	64878428	64882385	-	-3.39108	-3.47608	-4.23147	0.00178375	0.0874234	-0.938572
ENSG00000100479.14	protein_coding	POLE2	2	OTTHUMG00000170813.3	chr14	HAVANA	gene	49643555	49688422	-	-1.70083	0.803417	-4.28936	0.00162905	0.0864878	-0.940076
ENSG00000296456.1	lncRNA	ENSG00000296456	2	NA	chrX	HAVANA	gene	153925587	153926181	+	-2.94329	-3.85693	-4.23976	0.00176069	0.0874234	-0.940792
ENSG00000279110.1	lncRNA	ENSG00000279110	2	OTTHUMG00000189169.1	chr22	HAVANA	gene	25052122	25065241	-	-2.75295	-4.01542	-4.24149	0.0017559	0.0874234	-0.94183
ENSG00000306723.1	lncRNA	ENSG00000306723	2	NA	chr11	HAVANA	gene	65652699	65654296	+	-3.53379	-1.49094	-4.2416	0.00175559	0.0874234	-0.942565
ENSG00000241163.11	lncRNA	LINC00877	2	OTTHUMG00000158784.20	chr3	HAVANA	gene	71943592	72279946	-	-2.20549	0.330439	-4.28623	0.00163706	0.0864878	-0.942725
ENSG00000062582.14	protein_coding	MRPS24	2	OTTHUMG00000023175.5	chr7	HAVANA	gene	43866558	43869893	-	-3.26152	-2.60765	-4.22539	0.00180088	0.0878126	-0.944504
ENSG00000049249.10	protein_coding	TNFRSF9	1	OTTHUMG00000001223.5	chr1	HAVANA	gene	7915871	7943165	-	-4.51685	0.692914	-4.33943	0.00150669	0.0846031	-0.945116
ENSG00000304945.1	lncRNA	ENSG00000304945	2	NA	chr11	HAVANA	gene	65134579	65137240	+	-3.15103	-1.80725	-4.23026	0.00178715	0.0874234	-0.946335
ENSG00000183055.5	processed_pseudogene	FAM133CP	1	OTTHUMG00000018272.1	chr10	HAVANA	gene	58715554	58716257	+	4.4125	0.727533	4.22568	0.00180006	0.0878126	-0.949196
ENSG00000302623.1	lncRNA	ENSG00000302623	2	NA	chr5	HAVANA	gene	97049344	97086763	+	-2.79017	-0.898538	-4.23179	0.00178284	0.0874234	-0.949517
ENSG00000199879.1	snRNA	RNVU1-22	3	NA	chr1	ENSEMBL	gene	148263476	148263632	+	-2.76964	-4.38096	-4.23771	0.00176636	0.0874234	-0.951582
ENSG00000294614.1	lncRNA	ENSG00000294614	2	NA	chr2	HAVANA	gene	121074938	121075397	-	-2.76964	-4.38096	-4.23771	0.00176636	0.0874234	-0.951582
ENSG00000302530.1	lncRNA	ENSG00000302530	2	NA	chr3	HAVANA	gene	195835447	195836713	+	-2.76964	-4.38096	-4.23771	0.00176636	0.0874234	-0.951582
ENSG00000300057.1	lncRNA	ENSG00000300057	2	NA	chr11	HAVANA	gene	61161785	61162248	+	-2.76964	-4.38096	-4.23771	0.00176636	0.0874234	-0.951582
ENSG00000259205.2	processed_pseudogene	PRKXP1	1	OTTHUMG00000172351.2	chr15	HAVANA	gene	100553529	100558954	-	-2.08211	-0.00407838	-4.25333	0.0017236	0.0872583	-0.952545
ENSG00000286887.2	lncRNA	ENSG00000286887	2	OTTHUMG00000194221.1	chr6	HAVANA	gene	134295939	134308276	+	-2.94456	-4.34226	-4.23223	0.00178163	0.0874234	-0.955307
ENSG00000196781.16	protein_coding	TLE1	2	OTTHUMG00000021008.4	chr9	HAVANA	gene	81583683	81689547	-	1.96769	5.17037	4.38566	0.00140232	0.0812972	-0.955568
ENSG00000115267.10	protein_coding	IFIH1	2	OTTHUMG00000132055.7	chr2	HAVANA	gene	162267074	162318684	-	-1.87608	5.4446	-4.48185	0.00120889	0.077996	-0.972049
ENSG00000301257.1	lncRNA	ENSG00000301257	2	NA	chr2	HAVANA	gene	201259866	201260473	-	-3.01614	-4.32621	-4.21765	0.00182291	0.0886023	-0.973584
ENSG00000228253.1	protein_coding	MT-ATP8	3	NA	chrM	ENSEMBL	gene	8366	8572	+	-2.54277	4.61654	-4.44108	0.00128719	0.0796378	-0.974778
ENSG00000249378.9	lncRNA	LINC01060	2	OTTHUMG00000160242.20	chr4	HAVANA	gene	188400569	188681051	+	3.85707	0.246697	4.20758	0.00185204	0.0887537	-0.974969
ENSG00000298773.1	lncRNA	ENSG00000298773	2	NA	chr2	HAVANA	gene	231436843	231453227	-	-3.5542	-3.63129	-4.20195	0.00186854	0.0887537	-0.978933
ENSG00000138755.6	protein_coding	CXCL9	2	OTTHUMG00000160889.2	chr4	HAVANA	gene	76001275	76007509	-	-4.95529	2.36848	-4.39297	0.00138652	0.0806151	-0.979046
ENSG00000278876.1	TEC	ENSG00000278876	2	OTTHUMG00000177917.1	chr17	HAVANA	gene	81862778	81863102	+	-1.86273	-0.532326	-4.21612	0.00182731	0.0886742	-0.983033
ENSG00000306450.1	lncRNA	ENSG00000306450	2	NA	chr3	HAVANA	gene	128590244	128618652	-	-3.78435	-2.55647	-4.19925	0.0018765	0.0887537	-0.983958
ENSG00000309714.1	lncRNA	ENSG00000309714	2	NA	chr1	HAVANA	gene	211738001	211740014	-	-3.08911	-3.95852	-4.2055	0.00185811	0.0887537	-0.985704
ENSG00000301408.1	lncRNA	ENSG00000301408	2	NA	chr9	HAVANA	gene	136701060	136708647	+	-2.93294	-3.67932	-4.20167	0.00186935	0.0887537	-0.986485
ENSG00000226070.3	lncRNA	LINC00951	2	OTTHUMG00000014659.1	chr6	HAVANA	gene	40344342	40387365	-	-3.45196	-3.59096	-4.19618	0.0018856	0.0887537	-0.989559
ENSG00000066279.19	protein_coding	ASPM	2	OTTHUMG00000036277.2	chr1	HAVANA	gene	197084121	197146694	-	-4.1754	2.90018	-4.3815	0.00141138	0.0815283	-0.993232
ENSG00000141086.18	protein_coding	CTRL	2	OTTHUMG00000137552.7	chr16	HAVANA	gene	67927640	67932365	-	-3.0136	-3.81372	-4.19527	0.00188831	0.0887537	-0.993802
ENSG00000212907.2	protein_coding	MT-ND4L	3	NA	chrM	ENSEMBL	gene	10470	10766	+	-2.95636	6.86663	-4.50317	0.00116998	0.0774679	-0.996072
ENSG00000250321.1	processed_pseudogene	ENSG00000250321	1	OTTHUMG00000159937.1	chr4	HAVANA	gene	342821	342962	-	-3.11	-2.9883	-4.18925	0.00190631	0.0887537	-0.996946
ENSG00000263513.6	protein_coding	FAM72C	2	OTTHUMG00000041029.3	chr1	HAVANA	gene	143955287	143971986	-	-3.02214	-3.61161	-4.18798	0.00191012	0.0887537	-1.00105
ENSG00000107807.13	protein_coding	TLX1	1	OTTHUMG00000019341.7	chr10	HAVANA	gene	101131300	101137789	+	-2.87177	-3.047	-4.18415	0.0019217	0.0887537	-1.00316
ENSG00000256582.1	lncRNA	LINC02390	2	OTTHUMG00000168371.1	chr12	HAVANA	gene	9704077	9709350	+	-3.20085	-2.26121	-4.19058	0.00190231	0.0887537	-1.00363
ENSG00000164485.15	protein_coding	IL22RA2	2	OTTHUMG00000015655.3	chr6	HAVANA	gene	137143820	137173648	-	-3.11083	-4.3389	-4.19603	0.00188605	0.0887537	-1.00405
ENSG00000197253.14	protein_coding	TPSB2	2	OTTHUMG00000155926.4	chr16	HAVANA	gene	1227272	1232757	-	7.48097	0.655819	4.20114	0.00187091	0.0887537	-1.00672
ENSG00000300365.1	lncRNA	ENSG00000300365	2	NA	chr1	HAVANA	gene	172531332	172532414	-	-2.83702	-3.79172	-4.18583	0.00191661	0.0887537	-1.01148
ENSG00000222881.1	misc_RNA	Y_RNA	3	NA	chr17	ENSEMBL	gene	40391232	40391338	-	-2.90258	-3.47721	-4.18086	0.00193171	0.0887537	-1.01209
ENSG00000198727.2	protein_coding	MT-CYB	3	NA	chrM	ENSEMBL	gene	14747	15887	+	-2.77884	9.0678	-4.53564	0.00111325	0.0766852	-1.01248
ENSG00000288879.3	lncRNA	ENSG00000288879	2	NA	chr6	HAVANA	gene	34235830	34236794	-	-4.20169	-2.57944	-4.18094	0.00193145	0.0887537	-1.01365
ENSG00000251898.1	scaRNA	SCARNA11	3	NA	chr12	ENSEMBL	gene	6581474	6581609	-	-2.78217	-3.18825	-4.17656	0.00194485	0.0887537	-1.01526
ENSG00000173868.12	protein_coding	PHOSPHO1	1	OTTHUMG00000161305.4	chr17	HAVANA	gene	49223366	49230787	-	-3.34258	-1.83583	-4.17836	0.00193934	0.0887537	-1.0159
ENSG00000225857.5	lncRNA	LINC02816	2	OTTHUMG00000035182.1	chr1	HAVANA	gene	180906651	180909166	+	-3.04393	-2.58533	-4.17496	0.00194978	0.0887537	-1.01637
ENSG00000309100.1	lncRNA	ENSG00000309100	2	NA	chr1	HAVANA	gene	89274654	89275200	+	-3.24806	-3.70092	-4.17584	0.00194707	0.0887537	-1.01759
ENSG00000308500.1	lncRNA	ENSG00000308500	2	NA	chr11	HAVANA	gene	33893894	33917667	+	-3.27284	-3.71404	-4.17282	0.00195638	0.0888353	-1.02232
ENSG00000299114.1	lncRNA	ENSG00000299114	2	NA	chr3	HAVANA	gene	38137413	38138274	+	-3.0034	-3.23091	-4.16907	0.00196799	0.0890859	-1.02531
ENSG00000304400.1	lncRNA	ENSG00000304400	2	NA	chr8	HAVANA	gene	65231075	65236979	-	-3.50312	-3.25364	-4.16848	0.00196983	0.0890859	-1.02558
ENSG00000297126.1	lncRNA	ENSG00000297126	2	NA	chr4	HAVANA	gene	114682304	114689959	+	-3.33267	-2.45405	-4.16793	0.00197152	0.0890859	-1.03364
ENSG00000255299.6	lncRNA	ENSG00000255299	2	OTTHUMG00000167518.1	chr11	HAVANA	gene	58497888	58524689	-	-2.48444	-0.331582	-4.19165	0.00189909	0.0887537	-1.03372
ENSG00000287626.2	lncRNA	ENSG00000287626	2	OTTHUMG00000194553.1	chr6	HAVANA	gene	15535192	15560665	+	-3.20952	-0.56004	-4.19	0.00190404	0.0887537	-1.03629
ENSG00000134686.21	protein_coding	PHC2	2	OTTHUMG00000004133.1	chr1	HAVANA	gene	33323623	33431095	-	1.28512	6.41527	4.41039	0.00134965	0.0800773	-1.03904
ENSG00000262408.1	processed_pseudogene	ENSG00000262408	2	OTTHUMG00000178123.1	chr17	HAVANA	gene	56884639	56884819	-	-3.20729	-3.344	-4.16129	0.00199234	0.0891794	-1.03947
ENSG00000299307.1	lncRNA	ENSG00000299307	2	NA	chr10	HAVANA	gene	119595741	119598539	+	-1.98252	0.0792141	-4.19699	0.0018832	0.0887537	-1.03982
ENSG00000244332.1	lncRNA	ENSG00000244332	2	OTTHUMG00000018792.1	chr10	HAVANA	gene	94577439	94611238	+	-3.27323	-2.72401	-4.15829	0.00200181	0.0891794	-1.04165
ENSG00000206633.1	snoRNA	SNORA80B	3	NA	chr2	ENSEMBL	gene	10446714	10446849	-	-3.05698	-0.120975	-4.20952	0.00184638	0.0887537	-1.04421
ENSG00000287765.1	lncRNA	ENSG00000287765	2	OTTHUMG00000194180.1	chr14	HAVANA	gene	24188914	24193106	+	-3.37087	-3.31203	-4.15342	0.00201727	0.0891794	-1.04696
ENSG00000258611.2	transcribed_processed_pseudogene	YBX2P2	1	OTTHUMG00000171782.2	chr15	HAVANA	gene	93065586	93066606	-	3.6082	-2.2966	4.1873	0.00191216	0.0887537	-1.0471
ENSG00000299979.1	lncRNA	ENSG00000299979	2	NA	chr7	HAVANA	gene	142808416	142808847	-	-3.32633	-4.04854	-4.15743	0.00200451	0.0891794	-1.04715
ENSG00000302963.1	lncRNA	ENSG00000302963	2	NA	chr17	HAVANA	gene	58335121	58336025	-	-2.71343	-3.97917	-4.16145	0.00199184	0.0891794	-1.04717
ENSG00000175602.4	protein_coding	CCDC85B	2	OTTHUMG00000166722.2	chr11	HAVANA	gene	65890673	65891635	+	1.6013	3.5496	4.25018	0.00173213	0.0874065	-1.05344
ENSG00000308160.1	lncRNA	ENSG00000308160	2	NA	chr19	HAVANA	gene	47100090	47100353	-	-3.64245	-2.35519	-4.14983	0.00202876	0.0891794	-1.0558
ENSG00000163273.4	protein_coding	NPPC	2	OTTHUMG00000133232.3	chr2	HAVANA	gene	231921809	231926396	-	-2.59334	-3.95852	-4.16217	0.00198955	0.0891794	-1.058
ENSG00000256862.6	lncRNA	PARP11-AS1	2	OTTHUMG00000168120.5	chr12	HAVANA	gene	3871542	3916616	+	-2.98167	-4.04547	-4.15076	0.00202578	0.0891794	-1.06087
ENSG00000279602.2	lncRNA	ENSG00000279602	2	OTTHUMG00000176042.2	chr17	HAVANA	gene	43360033	43361361	-	-2.85184	0.00928066	-4.1862	0.0019155	0.0887537	-1.06291
ENSG00000294824.1	lncRNA	ENSG00000294824	2	NA	chr19	HAVANA	gene	58384758	58386715	-	-2.71395	-3.97917	-4.14716	0.00203735	0.0891794	-1.0668
ENSG00000183807.8	protein_coding	FAM162B	2	OTTHUMG00000015446.3	chr6	HAVANA	gene	116752197	116765719	-	4.42406	0.423737	4.14416	0.00204704	0.0894747	-1.06754
ENSG00000118193.12	protein_coding	KIF14	2	OTTHUMG00000035723.2	chr1	HAVANA	gene	200551497	200620751	-	-3.74817	1.04784	-4.259	0.00170835	0.0872583	-1.06792
ENSG00000172638.13	protein_coding	EFEMP2	1	OTTHUMG00000166664.8	chr11	HAVANA	gene	65866441	65873592	-	3.17424	5.22073	4.27018	0.00167868	0.0872545	-1.07017
ENSG00000145113.22	protein_coding	MUC4	1	OTTHUMG00000151827.7	chr3	HAVANA	gene	195746765	195811973	-	-4.95896	1.6517	-4.31089	0.00157519	0.0860889	-1.07075
ENSG00000239544.1	processed_pseudogene	ENSG00000239544	1	OTTHUMG00000157987.1	chr14	HAVANA	gene	72963645	72964008	-	-2.8543	-4.06847	-4.14801	0.0020346	0.0891794	-1.07319
ENSG00000289267.2	lncRNA	ENSG00000289267	2	NA	chr5	HAVANA	gene	138461266	138465012	-	-3.24016	-3.11181	-4.13518	0.00207636	0.0898515	-1.07354
ENSG00000270066.4	lncRNA	ENSG00000270066	2	OTTHUMG00000184013.1	chr1	HAVANA	gene	109100094	109103279	+	-3.74454	-2.25806	-4.13937	0.00206261	0.0898515	-1.07424
ENSG00000272735.3	lncRNA	ENSG00000272735	2	OTTHUMG00000185975.1	chr2	HAVANA	gene	71067517	71068559	-	-2.15457	-1.74316	-4.13705	0.00207022	0.0898515	-1.07475
ENSG00000234572.2	lncRNA	LINC01800	2	OTTHUMG00000152703.1	chr2	HAVANA	gene	64756982	64899994	-	-2.1457	-0.074377	-4.17435	0.00195166	0.0887537	-1.07694
ENSG00000184304.17	protein_coding	PRKD1	2	OTTHUMG00000140203.8	chr14	HAVANA	gene	29576479	30191898	-	4.4786	3.22804	4.15414	0.00201498	0.0891794	-1.07747
ENSG00000196668.5	lncRNA	LINC00173	2	OTTHUMG00000157726.2	chr12	HAVANA	gene	116533399	116536522	+	-1.98546	-0.49194	-4.15691	0.00200616	0.0891794	-1.07892
ENSG00000260852.2	lncRNA	FBXL19-AS1	2	OTTHUMG00000176767.1	chr16	HAVANA	gene	30919319	30923279	-	-1.54936	1.71368	-4.23034	0.00178692	0.0874234	-1.07945
ENSG00000289412.3	lncRNA	ZEBTR	2	NA	chr10	HAVANA	gene	31757587	31760219	-	-2.19532	-2.71867	-4.12698	0.00210352	0.0899599	-1.085
ENSG00000289610.3	lncRNA	ENSG00000289610	2	NA	chr1	HAVANA	gene	2585590	2586283	+	-3.05666	-3.89685	-4.12984	0.00209401	0.0899599	-1.08553
ENSG00000110841.14	protein_coding	PPFIBP1	2	OTTHUMG00000169207.3	chr12	HAVANA	gene	27523431	27695564	+	1.34477	6.95376	4.39524	0.00138164	0.0806151	-1.08786
ENSG00000260288.7	lncRNA	ENSG00000260288	2	OTTHUMG00000172793.14	chr15	HAVANA	gene	75737724	75763326	+	-3.54744	-3.02141	-4.12427	0.00211258	0.090135	-1.08939
ENSG00000300002.1	lncRNA	ENSG00000300002	2	NA	chr1	HAVANA	gene	240531688	240576391	-	-2.90061	-2.62319	-4.12293	0.00211705	0.0901391	-1.09124
ENSG00000104921.15	protein_coding	FCER2	2	OTTHUMG00000182517.4	chr19	HAVANA	gene	7688758	7702146	-	-4.43666	1.25237	-4.24531	0.00174541	0.0874234	-1.0921
ENSG00000298788.1	lncRNA	ENSG00000298788	2	NA	chr12	HAVANA	gene	120302470	120317581	-	-2.6738	-1.73578	-4.12656	0.00210493	0.0899599	-1.09509
ENSG00000198868.3	processed_pseudogene	MTND4LP30	2	OTTHUMG00000163074.1	chr5	HAVANA	gene	134928030	134928326	-	-3.2894	-4.2652	-4.12247	0.00211862	0.0901391	-1.09919
ENSG00000110108.11	protein_coding	TMEM109	2	OTTHUMG00000167801.2	chr11	HAVANA	gene	60913907	60923443	+	1.59942	5.7531	4.33561	0.00151566	0.0847934	-1.10042
ENSG00000157214.14	protein_coding	STEAP2	1	OTTHUMG00000023341.13	chr7	HAVANA	gene	90167590	90238137	+	4.0438	4.42839	4.18531	0.00191818	0.0887537	-1.10048
ENSG00000212195.2	snoRNA	U3	3	NA	chr17	ENSEMBL	gene	58631641	58631836	-	-4.03816	-0.945966	-4.13797	0.0020672	0.0898515	-1.10494
ENSG00000186318.18	protein_coding	BACE1	2	OTTHUMG00000160636.11	chr11	HAVANA	gene	117285232	117316259	-	1.93176	5.23836	4.2988	0.00160521	0.0864617	-1.11289
ENSG00000291062.2	lncRNA	ENSG00000291062	2	NA	chr15	HAVANA	gene	84079928	84393208	+	-3.04683	-3.28012	-4.10582	0.00217535	0.0902476	-1.11487
ENSG00000232133.1	processed_pseudogene	IMPDH1P10	2	OTTHUMG00000154711.1	chr2	HAVANA	gene	201137516	201140027	-	-2.83702	-3.95022	-4.11088	0.00215791	0.0902476	-1.11492
ENSG00000135476.12	protein_coding	ESPL1	2	OTTHUMG00000169674.6	chr12	HAVANA	gene	53268299	53293638	+	-3.18082	1.72792	-4.25343	0.00172332	0.0872583	-1.11528
ENSG00000265253.1	miRNA	MIR4446	3	NA	chr3	ENSEMBL	gene	113594876	113594942	+	-2.68752	-4.20182	-4.11568	0.00214153	0.0902476	-1.11528
ENSG00000260997.1	lncRNA	ENSG00000260997	2	OTTHUMG00000173373.1	chr7	HAVANA	gene	44958999	44960909	-	-4.41458	-0.752121	-4.16726	0.00197363	0.0890859	-1.11822
ENSG00000211826.1	TR_J_gene	TRDJ4	2	OTTHUMG00000170902.3	chr14	HAVANA	gene	22455249	22455296	+	-2.68979	-4.41595	-4.11619	0.00213982	0.0902476	-1.11881
ENSG00000074590.14	protein_coding	NUAK1	1	OTTHUMG00000169763.4	chr12	HAVANA	gene	106063345	106138954	-	3.20347	5.11205	4.22269	0.00180853	0.0880441	-1.1205
ENSG00000303123.1	lncRNA	ENSG00000303123	2	NA	chrX	HAVANA	gene	48919185	48922681	+	-3.36722	-3.13127	-4.10106	0.00219183	0.0902476	-1.12185
ENSG00000294643.1	lncRNA	ENSG00000294643	2	NA	chr6	HAVANA	gene	14108963	14111524	+	-3.91536	-3.08754	-4.1014	0.00219065	0.0902476	-1.12315
ENSG00000121621.7	protein_coding	KIF18A	2	OTTHUMG00000166195.4	chr11	HAVANA	gene	28020619	28108156	-	-2.47024	0.562584	-4.17743	0.00194219	0.0887537	-1.1255
ENSG00000235597.4	lncRNA	LINC01102	2	OTTHUMG00000153050.33	chr2	HAVANA	gene	104430130	104532747	+	-2.57572	-4.22246	-4.10887	0.00216483	0.0902476	-1.12613
ENSG00000070729.14	protein_coding	CNGB1	2	OTTHUMG00000154810.7	chr16	HAVANA	gene	57882340	57971128	-	-2.57572	-4.22246	-4.10887	0.00216483	0.0902476	-1.12613
ENSG00000309266.1	lncRNA	ENSG00000309266	2	NA	chr12	HAVANA	gene	104764632	104812876	+	-2.88017	-3.32335	-4.09615	0.00220901	0.0903846	-1.12875
ENSG00000308563.1	lncRNA	ENSG00000308563	2	NA	chr17	HAVANA	gene	40532246	40549332	-	-3.07044	-2.42822	-4.09959	0.00219696	0.0903103	-1.13012
ENSG00000116209.12	protein_coding	TMEM59	2	OTTHUMG00000008437.7	chr1	HAVANA	gene	54026681	54053504	-	1.15505	6.76682	4.36426	0.00144965	0.0828375	-1.13021
ENSG00000259678.1	lncRNA	ENSG00000259678	2	OTTHUMG00000172524.1	chr15	HAVANA	gene	51414097	51498833	+	4.33366	-1.12377	4.10727	0.00217031	0.0902476	-1.13023
ENSG00000065054.14	protein_coding	NHERF2	1	OTTHUMG00000176956.4	chr16	HAVANA	gene	2025356	2039026	+	1.92188	5.62187	4.29863	0.00160562	0.0864617	-1.13601
ENSG00000256714.1	lncRNA	ENSG00000256714	2	OTTHUMG00000169099.1	chr12	HAVANA	gene	22395088	22398075	-	-3.85253	-2.77057	-4.09577	0.00221033	0.0903846	-1.13639
ENSG00000143341.12	protein_coding	HMCN1	2	OTTHUMG00000059337.4	chr1	HAVANA	gene	185734391	186190949	+	4.72427	5.87934	4.20326	0.00186468	0.0887537	-1.13745
ENSG00000124299.16	protein_coding	PEPD	1	OTTHUMG00000180470.17	chr19	HAVANA	gene	33386950	33521823	-	1.18917	5.32227	4.30265	0.00159558	0.0863905	-1.13962
ENSG00000289188.1	lncRNA	ENSG00000289188	2	NA	chr10	HAVANA	gene	24578905	24580915	-	-3.43945	-3.38393	-4.08719	0.00224069	0.0906628	-1.14157
ENSG00000287032.2	lncRNA	ENSG00000287032	2	OTTHUMG00000195117.1	chr7	HAVANA	gene	35590723	35625119	-	-2.13654	0.481142	-4.14759	0.00203595	0.0891794	-1.14239
ENSG00000136929.13	protein_coding	HEMGN	2	OTTHUMG00000020336.4	chr9	HAVANA	gene	97926791	97944856	-	-4.31735	-1.23553	-4.11108	0.00215723	0.0902476	-1.14347
ENSG00000307241.1	lncRNA	ENSG00000307241	2	NA	chr3	HAVANA	gene	51539664	51541057	+	-1.47888	1.51906	-4.17718	0.00194295	0.0887537	-1.14569
ENSG00000310533.1	lncRNA	ENSG00000310533	2	NA	chr7	HAVANA	gene	73005552	73030376	+	-1.99709	-0.8345	-4.10465	0.00217937	0.0902476	-1.14595
ENSG00000231873.3	lncRNA	ENSG00000231873	1	OTTHUMG00000156011.2	chr3	HAVANA	gene	40719859	40862846	+	2.68087	-1.72825	4.09567	0.00221067	0.0903846	-1.146
ENSG00000189057.11	protein_coding	FAM111B	2	OTTHUMG00000167279.5	chr11	HAVANA	gene	59107185	59127412	+	-5.38168	0.254063	-4.17667	0.00194452	0.0887537	-1.14739
ENSG00000113805.9	protein_coding	CNTN3	2	OTTHUMG00000158813.1	chr3	HAVANA	gene	74262568	74614659	-	5.95904	0.39697	4.09465	0.00221429	0.090411	-1.14753
ENSG00000289063.3	lncRNA	ENSG00000289063	2	NA	chr3	HAVANA	gene	53891445	53892916	+	-2.95038	-3.45311	-4.0822	0.00225856	0.0907597	-1.14969
ENSG00000267679.1	processed_pseudogene	EIF5AP2	1	OTTHUMG00000177447.1	chr17	HAVANA	gene	78157403	78159135	+	-2.75273	-3.97672	-4.08461	0.0022499	0.0907597	-1.15297
ENSG00000226576.1	lncRNA	ENSG00000226576	2	OTTHUMG00000018185.1	chr10	HAVANA	gene	48984564	49018897	+	-3.11957	-3.52962	-4.07908	0.0022698	0.0907597	-1.15342
ENSG00000262904.1	processed_pseudogene	TMPOP2	1	OTTHUMG00000177355.1	chr16	HAVANA	gene	74667506	74668706	+	-2.75428	-4.17392	-4.08627	0.00224396	0.0906628	-1.15364
ENSG00000280241.5	lncRNA	ENSG00000280241	2	OTTHUMG00000189143.2	chr4	HAVANA	gene	153759468	154300500	+	4.13378	1.63001	4.07499	0.0022846	0.0907597	-1.16144
ENSG00000289927.2	lncRNA	ENSG00000289927	2	NA	chr21	HAVANA	gene	38229926	38235572	+	-3.24696	-3.60624	-4.07099	0.00229921	0.0907597	-1.1649
ENSG00000183087.15	protein_coding	GAS6	2	OTTHUMG00000017395.5	chr13	HAVANA	gene	113820549	113864076	-	3.24785	6.83226	4.28803	0.00163244	0.0864878	-1.16634
ENSG00000250688.1	TR_J_pseudogene	TRAJ55	2	OTTHUMG00000170912.1	chr14	HAVANA	gene	22481697	22481753	+	-2.68752	-4.04332	-4.07818	0.00227305	0.0907597	-1.1667
ENSG00000201863.1	snoRNA	ENSG00000201863	3	NA	chr4	ENSEMBL	gene	40082983	40083106	+	-2.08979	-2.04349	-4.07066	0.0023004	0.0907597	-1.16675
ENSG00000258872.2	transcribed_processed_pseudogene	FDPSP3	1	OTTHUMG00000171028.2	chr14	HAVANA	gene	54884849	54886213	-	-2.78178	-0.914521	-4.09676	0.00220686	0.0903846	-1.16706
ENSG00000308897.1	lncRNA	ENSG00000308897	2	NA	chr12	HAVANA	gene	57088245	57088625	-	-3.05614	-3.66466	-4.06989	0.00230323	0.0907597	-1.16932
ENSG00000185697.17	protein_coding	MYBL1	1	OTTHUMG00000164559.5	chr8	HAVANA	gene	66562175	66614247	-	-1.62981	3.26554	-4.26129	0.00170223	0.0872583	-1.17179
ENSG00000255949.1	lncRNA	RPS6KB2-AS1	1	OTTHUMG00000168038.1	chr11	HAVANA	gene	67431367	67435399	-	-2.76321	-2.42954	-4.06828	0.00230916	0.0907597	-1.17327
ENSG00000115226.10	protein_coding	FNDC4	2	OTTHUMG00000097787.3	chr2	HAVANA	gene	27491883	27495200	-	2.63547	2.50718	4.10118	0.00219141	0.0902476	-1.17426
ENSG00000289469.3	lncRNA	ENSG00000289469	2	NA	chr3	HAVANA	gene	129183767	129225602	+	-2.00927	-0.00502393	-4.10276	0.00218593	0.0902476	-1.17444
ENSG00000256955.3	lncRNA	ENSG00000256955	2	OTTHUMG00000168051.2	chr12	HAVANA	gene	131855699	131864542	+	-2.8866	-3.72253	-4.0637	0.00232608	0.0907597	-1.177
ENSG00000119986.7	protein_coding	AVPI1	2	OTTHUMG00000018864.2	chr10	HAVANA	gene	97677424	97687241	-	2.90818	3.98885	4.16601	0.00197754	0.0891301	-1.17736
ENSG00000118491.10	protein_coding	ZC2HC1B	2	OTTHUMG00000015734.3	chr6	HAVANA	gene	143864436	143938343	+	-2.59334	-4.43401	-4.07373	0.00228921	0.0907597	-1.17794
ENSG00000188038.8	protein_coding	NRN1L	2	OTTHUMG00000137541.4	chr16	HAVANA	gene	67884885	67888855	+	-2.59334	-4.43401	-4.07373	0.00228921	0.0907597	-1.17794
ENSG00000012124.17	protein_coding	CD22	1	OTTHUMG00000183298.5	chr19	HAVANA	gene	35319261	35347361	+	-4.34662	3.11844	-4.29765	0.0016081	0.0864617	-1.17844
ENSG00000226979.9	protein_coding	LTA	2	OTTHUMG00000031135.2	chr6	HAVANA	gene	31572054	31574324	+	-4.07776	-1.15417	-4.08858	0.00223575	0.0906628	-1.18135
ENSG00000307982.1	lncRNA	ENSG00000307982	2	NA	chr1	HAVANA	gene	206885311	206895805	-	-3.0067	-3.3894	-4.05824	0.00234641	0.0907977	-1.18286
ENSG00000150457.9	protein_coding	LATS2	2	OTTHUMG00000016531.2	chr13	HAVANA	gene	20973036	21061586	-	1.80731	5.73105	4.27264	0.00167224	0.0872545	-1.18375
ENSG00000008256.17	protein_coding	CYTH3	2	OTTHUMG00000023440.4	chr7	HAVANA	gene	6161779	6272644	-	1.84823	5.58412	4.26848	0.00168316	0.0872545	-1.18541
ENSG00000114455.15	protein_coding	HHLA2	1	OTTHUMG00000159224.5	chr3	HAVANA	gene	108296529	108378285	+	-3.96082	-2.27865	-4.06873	0.00230752	0.0907597	-1.18918
ENSG00000261373.1	lncRNA	VPS9D1-AS1	2	OTTHUMG00000173220.1	chr16	HAVANA	gene	89711856	89718165	+	-3.04718	-0.406309	-4.11623	0.00213969	0.0902476	-1.18924
ENSG00000235376.5	protein_coding	RPEL1	2	OTTHUMG00000018980.2	chr10	HAVANA	gene	103245887	103248016	+	-3.16537	-3.72892	-4.0551	0.00235819	0.0909099	-1.18974
ENSG00000165475.15	protein_coding	CRYL1	2	OTTHUMG00000016516.4	chr13	HAVANA	gene	20403666	20525873	-	1.31233	3.93621	4.19324	0.00189435	0.0887537	-1.19154
ENSG00000168412.7	protein_coding	MTNR1A	2	OTTHUMG00000185575.1	chr4	HAVANA	gene	186526792	186555567	-	-3.43926	-1.49403	-4.08617	0.00224434	0.0906628	-1.19165
ENSG00000107249.24	protein_coding	GLIS3	2	OTTHUMG00000019463.7	chr9	HAVANA	gene	3824127	4348392	-	1.19193	5.15822	4.26063	0.00170398	0.0872583	-1.19316
ENSG00000282133.1	TR_J_gene	TRBJ1-3	2	OTTHUMG00000190605.3	chr7	HAVANA	gene	142787630	142787679	+	-3.06631	-1.68418	-4.06334	0.0023274	0.0907597	-1.19568
ENSG00000183691.6	protein_coding	NOG	2	OTTHUMG00000151770.3	chr17	HAVANA	gene	56593699	56595611	+	2.43595	-0.452538	4.04906	0.00238101	0.0911029	-1.19748
ENSG00000295035.1	lncRNA	ENSG00000295035	2	NA	chr3	HAVANA	gene	14364229	14365361	-	-3.05216	-3.61258	-4.04652	0.00239067	0.0911029	-1.20022
ENSG00000139132.16	protein_coding	FGD4	1	OTTHUMG00000137374.7	chr12	HAVANA	gene	32399558	32646050	+	1.55489	6.69331	4.31071	0.00157565	0.0860889	-1.20273
ENSG00000082781.12	protein_coding	ITGB5	1	OTTHUMG00000159432.10	chr3	HAVANA	gene	124761948	124901418	-	2.96333	6.89692	4.28646	0.00163646	0.0864878	-1.20468
ENSG00000308546.1	lncRNA	ENSG00000308546	2	NA	chr6	HAVANA	gene	149084186	149094543	+	-2.75428	-4.17392	-4.04826	0.00238406	0.0911029	-1.20612
ENSG00000011465.18	protein_coding	DCN	1	OTTHUMG00000169998.7	chr12	HAVANA	gene	91140484	91183217	-	6.32193	8.18937	4.19909	0.00187696	0.0887537	-1.20939
ENSG00000288814.2	lncRNA	ENSG00000288814	2	NA	chr12	HAVANA	gene	6722904	6723972	-	-2.77584	-4.16771	-4.04721	0.00238806	0.0911029	-1.21193
ENSG00000260757.1	lncRNA	ENSG00000260757	2	OTTHUMG00000176615.1	chr16	HAVANA	gene	31402565	31404699	+	-2.77584	-4.16771	-4.04721	0.00238806	0.0911029	-1.21193
ENSG00000186185.14	protein_coding	KIF18B	1	OTTHUMG00000179867.2	chr17	HAVANA	gene	44924709	44947773	-	-4.57395	0.464432	-4.14878	0.00203214	0.0891794	-1.21375
ENSG00000144354.15	protein_coding	CDCA7	2	OTTHUMG00000132296.3	chr2	HAVANA	gene	173354820	173368997	+	-3.18134	1.88145	-4.19401	0.00189206	0.0887537	-1.21396
ENSG00000276509.2	lncRNA	ENSG00000276509	2	OTTHUMG00000188942.1	chr1	HAVANA	gene	146229086	146376495	+	-2.83263	-3.85587	-4.03737	0.00242586	0.0913304	-1.21607
ENSG00000267337.3	lncRNA	LINC01478	2	OTTHUMG00000178347.33	chr18	HAVANA	gene	44280768	44579978	-	-3.51817	-3.84094	-4.03482	0.00243574	0.0913304	-1.2171
ENSG00000286667.2	lncRNA	ENSG00000286667	2	OTTHUMG00000195683.1	chr19	HAVANA	gene	374420	387548	+	-3.14598	-2.43658	-4.04197	0.00240808	0.0913304	-1.21786
ENSG00000103044.11	protein_coding	HAS3	2	OTTHUMG00000137562.4	chr16	HAVANA	gene	69105653	69118719	+	-2.5141	0.869711	-4.12668	0.0021045	0.0899599	-1.21787
ENSG00000308366.1	lncRNA	ENSG00000308366	2	NA	chr7	HAVANA	gene	44962284	44979407	+	-2.88809	-3.72253	-4.03429	0.00243782	0.0913304	-1.21849
ENSG00000200169.1	snRNA	RNU5D-1	3	NA	chr1	ENSEMBL	gene	44731055	44731170	-	-3.7793	-3.00185	-4.03249	0.00244482	0.0913304	-1.22088
ENSG00000286409.3	lncRNA	ENSG00000286409	2	OTTHUMG00000193930.1	chr10	HAVANA	gene	32413499	32447352	-	-2.65877	-3.62347	-4.03268	0.00244408	0.0913304	-1.22283
ENSG00000289000.2	lncRNA	ENSG00000289000	2	NA	chr9	HAVANA	gene	131372152	131373468	-	-2.09576	-2.64121	-4.03063	0.00245212	0.0913304	-1.22313
ENSG00000129810.15	protein_coding	SGO1	2	OTTHUMG00000130479.7	chr3	HAVANA	gene	20160593	20186206	-	-3.8244	-0.275331	-4.11088	0.00215793	0.0902476	-1.22692
ENSG00000259920.1	lncRNA	ENSG00000259920	2	OTTHUMG00000173197.1	chr7	HAVANA	gene	130481491	130484392	-	-2.66589	-2.83381	-4.02723	0.00246546	0.0913304	-1.22835
ENSG00000285079.2	lncRNA	ENSG00000285079	2	OTTHUMG00000192361.1	chr1	HAVANA	gene	65703943	65720716	+	-2.9572	-3.36739	-4.02622	0.00246945	0.0913304	-1.22883
ENSG00000260179.1	lncRNA	ENSG00000260179	2	OTTHUMG00000175732.1	chr1	HAVANA	gene	1249777	1251334	-	-1.97193	-0.664561	-4.04757	0.00238667	0.0911029	-1.22899
ENSG00000150093.20	protein_coding	ITGB1	1	OTTHUMG00000017928.11	chr10	HAVANA	gene	32887273	33005792	-	1.319	9.05494	4.36314	0.00145217	0.0828375	-1.2292
ENSG00000068489.13	protein_coding	PRR11	1	OTTHUMG00000179362.3	chr17	HAVANA	gene	59155732	59206709	+	-2.7284	2.22322	-4.1888	0.00190767	0.0887537	-1.22921
ENSG00000182901.18	protein_coding	RGS7	2	OTTHUMG00000040107.4	chr1	HAVANA	gene	240767636	241357374	-	-2.97607	-2.34343	-4.03399	0.00243898	0.0913304	-1.22978
ENSG00000158481.13	protein_coding	CD1C	1	OTTHUMG00000017514.4	chr1	HAVANA	gene	158289923	158294774	+	-4.70526	-1.03543	-4.07813	0.00227321	0.0907597	-1.2301
ENSG00000228889.10	lncRNA	UBAC2-AS1	2	OTTHUMG00000017261.7	chr13	HAVANA	gene	99181223	99201558	-	-2.0913	-0.260176	-4.05747	0.0023493	0.0907977	-1.23106
ENSG00000146918.20	protein_coding	NCAPG2	2	OTTHUMG00000151438.5	chr7	HAVANA	gene	158631169	158704804	-	-1.43407	4.36232	-4.26942	0.00168067	0.0872545	-1.23181
ENSG00000234592.1	processed_pseudogene	TJAP1P1	1	OTTHUMG00000022368.1	chrX	HAVANA	gene	129041536	129043183	-	3.43778	-2.47043	4.04586	0.00239318	0.0911029	-1.23548
ENSG00000271969.1	lncRNA	ENSG00000271969	2	OTTHUMG00000185704.1	chr12	HAVANA	gene	6964949	6965382	+	-3.4093	-3.49034	-4.02109	0.00248979	0.0913304	-1.23621
ENSG00000306295.1	lncRNA	ENSG00000306295	2	NA	chr3	HAVANA	gene	52253607	52254010	+	-2.65597	-3.78197	-4.02308	0.00248186	0.0913304	-1.2363
ENSG00000290008.2	lncRNA	ENSG00000290008	2	NA	chr19	HAVANA	gene	15332594	15344642	+	-2.24342	0.943475	-4.11925	0.00212947	0.0902476	-1.23707
ENSG00000260271.5	lncRNA	ENSG00000260271	2	OTTHUMG00000175929.3	chr6	HAVANA	gene	90295507	90363912	+	-2.61772	-1.73634	-4.02697	0.00246648	0.0913304	-1.23962
ENSG00000228414.9	lncRNA	REL-DT	2	OTTHUMG00000152126.4	chr2	HAVANA	gene	60823069	60882232	-	-2.59785	-2.77417	-4.01806	0.00250188	0.0913304	-1.24132
ENSG00000118680.14	protein_coding	MYL12B	2	OTTHUMG00000131510.4	chr18	HAVANA	gene	3261479	3278461	+	0.986893	6.73664	4.29613	0.00161192	0.0864878	-1.24337
ENSG00000226091.8	lncRNA	LINC00937	2	OTTHUMG00000168663.1	chr12	HAVANA	gene	8244845	8453161	-	-2.0399	-0.0376065	-4.06581	0.00231827	0.0907597	-1.2438
ENSG00000306536.1	lncRNA	ENSG00000306536	2	NA	chr3	HAVANA	gene	122074478	122078648	-	-2.83372	-3.34295	-4.01548	0.00251221	0.0913304	-1.24404
ENSG00000254810.3	lncRNA	ENSG00000254810	1	OTTHUMG00000165260.1	chr11	HAVANA	gene	76648992	76657158	-	2.79889	1.43495	4.02934	0.00245716	0.0913304	-1.24564
ENSG00000167711.14	protein_coding	SERPINF2	1	OTTHUMG00000090552.5	chr17	HAVANA	gene	1742836	1755265	+	1.80701	2.08879	4.05817	0.00234667	0.0907977	-1.24824
ENSG00000296962.1	lncRNA	ENSG00000296962	2	NA	chr20	HAVANA	gene	13220194	13220894	+	5.33028	-0.357305	4.02218	0.00248545	0.0913304	-1.2485
ENSG00000157456.8	protein_coding	CCNB2	1	OTTHUMG00000132715.3	chr15	HAVANA	gene	59105126	59125045	+	-3.36576	0.720627	-4.11308	0.0021504	0.0902476	-1.25198
ENSG00000298379.1	lncRNA	ENSG00000298379	2	NA	chr18	HAVANA	gene	48898480	48917658	-	-3.14713	-3.78218	-4.01023	0.0025334	0.0915097	-1.25216
ENSG00000270177.2	lncRNA	PPP2CA-DT	2	OTTHUMG00000184010.1	chr5	HAVANA	gene	134226136	134227903	+	-2.53794	-2.01551	-4.01869	0.00249934	0.0913304	-1.25338
ENSG00000250602.7	lncRNA	ENSG00000250602	2	OTTHUMG00000163123.2	chr5	HAVANA	gene	126372477	126509021	-	2.95458	-2.00331	4.02428	0.0024771	0.0913304	-1.25654
ENSG00000101412.13	protein_coding	E2F1	2	OTTHUMG00000032265.3	chr20	HAVANA	gene	33675477	33686385	-	-1.75543	1.7198	-4.12638	0.00210552	0.0899599	-1.25704
ENSG00000257906.4	lncRNA	LINC02156	2	OTTHUMG00000169664.13	chr12	HAVANA	gene	47377638	47420192	+	-2.52341	-3.19294	-4.00559	0.00255232	0.0915696	-1.25827
ENSG00000213658.13	protein_coding	LAT	1	OTTHUMG00000131761.4	chr16	HAVANA	gene	28984826	28990784	+	-2.56195	-0.117723	-4.06018	0.00233914	0.0907977	-1.25875
ENSG00000273162.2	lncRNA	ENSG00000273162	2	OTTHUMG00000186479.1	chr10	HAVANA	gene	101056680	101061649	-	-2.35934	-1.62752	-4.02083	0.00249083	0.0913304	-1.26004
ENSG00000299119.1	lncRNA	ENSG00000299119	2	NA	chr15	HAVANA	gene	41475258	41486365	-	-2.48455	-4.45465	-4.01295	0.00252243	0.0913304	-1.26232
ENSG00000291262.2	lncRNA	ENSG00000291262	2	NA	chr16	HAVANA	gene	21879773	21889287	-	-2.48455	-4.45465	-4.01295	0.00252243	0.0913304	-1.26232
ENSG00000269416.8	lncRNA	LINC01224	2	OTTHUMG00000183272.2	chr19	HAVANA	gene	23399092	23416186	-	-2.48455	-4.45465	-4.01295	0.00252243	0.0913304	-1.26232
ENSG00000250507.1	transcribed_unprocessed_pseudogene	ENSG00000250507	2	OTTHUMG00000065809.2	chr19	HAVANA	gene	54328272	54331434	-	-2.48455	-4.45465	-4.01295	0.00252243	0.0913304	-1.26232
ENSG00000260388.2	lncRNA	LINC00562	2	OTTHUMG00000175994.2	chr13	HAVANA	gene	47930153	47932622	-	-3.59452	-2.10941	-4.00767	0.00254382	0.0915696	-1.26347
ENSG00000271938.2	lncRNA	ENSG00000271938	2	OTTHUMG00000185448.1	chr8	HAVANA	gene	42139451	42140812	-	-3.14646	-3.31779	-3.99988	0.00257575	0.0919461	-1.26687
ENSG00000201470.1	misc_RNA	RNY4P7	3	NA	chr2	ENSEMBL	gene	127798903	127798998	-	-2.17716	-1.17569	-4.01452	0.00251609	0.0913304	-1.2677
ENSG00000309803.1	lncRNA	ENSG00000309803	2	NA	chr1	HAVANA	gene	117803575	117866852	+	-2.90866	-3.63571	-3.99798	0.00258361	0.0921185	-1.26956
ENSG00000144824.21	protein_coding	PHLDB2	1	OTTHUMG00000159282.4	chr3	HAVANA	gene	111732497	111976517	+	2.5098	7.31294	4.27515	0.00166566	0.0872545	-1.26994
ENSG00000201801.1	snRNA	RNU5E-4P	3	NA	chr1	ENSEMBL	gene	11909808	11909927	-	-3.4491	-3.99786	-3.9963	0.00259054	0.0921494	-1.27366
ENSG00000279573.1	TEC	ENSG00000279573	2	OTTHUMG00000179780.1	chr17	HAVANA	gene	67955314	67957291	+	-1.48268	0.376383	-4.04702	0.00238878	0.0911029	-1.27707
ENSG00000137948.19	protein_coding	BRDT	2	OTTHUMG00000010113.5	chr1	HAVANA	gene	91949343	92014426	+	-2.82708	-3.67779	-3.99444	0.00259831	0.0923126	-1.27776
ENSG00000127220.6	protein_coding	ABHD8	1	OTTHUMG00000182663.3	chr19	HAVANA	gene	17292131	17310236	-	1.49401	2.79987	4.07365	0.00228949	0.0907597	-1.27928
ENSG00000229953.2	lncRNA	BCAN-AS2	1	OTTHUMG00000033321.1	chr1	HAVANA	gene	156614740	156661503	-	-2.88991	0.621676	-4.08705	0.00224118	0.0906628	-1.2846
ENSG00000224142.1	lncRNA	AMMECR1-IT1	2	OTTHUMG00000022194.1	chrX	HAVANA	gene	110305420	110307221	-	-3.74878	-2.85054	-3.98981	0.00261763	0.092571	-1.28752
ENSG00000127564.17	protein_coding	PKMYT1	1	OTTHUMG00000128975.4	chr16	HAVANA	gene	2968024	2980479	-	-3.44406	0.405635	-4.08261	0.00225709	0.0907597	-1.28863
ENSG00000260495.1	lncRNA	ENSG00000260495	2	OTTHUMG00000176492.1	chr16	HAVANA	gene	81310731	81313423	-	-2.32847	-0.735614	-4.01078	0.0025312	0.0915097	-1.29015
ENSG00000276404.1	miRNA	MIR6835	3	NA	chr6	ENSEMBL	gene	34240673	34240736	+	-3.12928	-3.63917	-3.98232	0.00264929	0.0932563	-1.29209
ENSG00000300516.1	lncRNA	ENSG00000300516	2	NA	chr20	HAVANA	gene	51379586	51383334	-	-2.79808	-3.92108	-3.98552	0.0026357	0.0930749	-1.29211
ENSG00000094963.14	protein_coding	FMO2	2	OTTHUMG00000035504.8	chr1	HAVANA	gene	171185249	171212686	+	5.96323	6.1135	4.0625	0.00233052	0.0907646	-1.29474
ENSG00000272892.2	lncRNA	ENSG00000272892	2	OTTHUMG00000186404.1	chr10	HAVANA	gene	67849481	67850746	+	-2.48851	-3.03929	-3.97981	0.00265997	0.0934158	-1.29529
ENSG00000138760.11	protein_coding	SCARB2	1	OTTHUMG00000130099.7	chr4	HAVANA	gene	76158737	76234536	-	0.918331	7.72958	4.29088	0.0016252	0.0864878	-1.29742
ENSG00000146373.17	protein_coding	RNF217	2	OTTHUMG00000015504.6	chr6	HAVANA	gene	124962437	125092633	+	2.3461	5.58916	4.1794	0.00193616	0.0887537	-1.29867
ENSG00000103522.17	protein_coding	IL21R	2	OTTHUMG00000131675.6	chr16	HAVANA	gene	27402174	27452042	+	-4.27577	2.41213	-4.18615	0.00191564	0.0887537	-1.30356
ENSG00000108239.9	protein_coding	TBC1D12	2	OTTHUMG00000018794.3	chr10	HAVANA	gene	94402541	94536332	+	1.39661	5.03564	4.17997	0.00193441	0.0887537	-1.30685
ENSG00000289962.2	lncRNA	ENSG00000289962	2	NA	chr1	HAVANA	gene	225466832	225467772	-	-2.79532	-4.07958	-3.9747	0.00268188	0.0939677	-1.30725
ENSG00000254698.1	lncRNA	ENSG00000254698	2	OTTHUMG00000166972.1	chr11	HAVANA	gene	82963681	83039115	-	-2.35451	-1.34683	-3.98141	0.00265315	0.0932839	-1.31082
ENSG00000293276.2	lncRNA	ENSG00000293276	2	NA	chr2	HAVANA	gene	173291316	173356389	-	-2.57705	-4.22246	-3.97234	0.00269206	0.0941076	-1.31409
ENSG00000307140.1	lncRNA	ENSG00000307140	2	NA	chr14	HAVANA	gene	105065609	105066173	+	-3.68847	-4.01971	-3.96506	0.0027237	0.0946687	-1.31669
ENSG00000067113.17	protein_coding	PLPP1	2	OTTHUMG00000162240.3	chr5	HAVANA	gene	55424854	55534969	-	3.24706	5.65683	4.13063	0.00209138	0.0899599	-1.31685
ENSG00000163507.15	protein_coding	CIP2A	2	OTTHUMG00000159233.3	chr3	HAVANA	gene	108549864	108589644	-	-1.59566	2.85956	-4.14764	0.00203582	0.0891794	-1.31729
ENSG00000163006.12	protein_coding	CCDC138	1	OTTHUMG00000130980.6	chr2	HAVANA	gene	108786757	108885477	+	-1.65483	1.98278	-4.09211	0.00222324	0.0905563	-1.31787
ENSG00000256723.1	processed_pseudogene	ENSG00000256723	1	OTTHUMG00000168108.1	chr11	HAVANA	gene	73994972	73996151	-	-3.13578	-4.09402	-3.96634	0.00271811	0.0945827	-1.31971
ENSG00000116729.14	protein_coding	WLS	2	OTTHUMG00000009153.5	chr1	HAVANA	gene	68098473	68233120	-	1.43336	5.3786	4.18982	0.0019046	0.0887537	-1.32367
ENSG00000138092.11	protein_coding	CENPO	1	OTTHUMG00000125525.4	chr2	HAVANA	gene	24793136	24822376	+	-1.97672	2.7543	-4.13571	0.00207463	0.0898515	-1.32413
ENSG00000286892.1	lncRNA	ENSG00000286892	2	OTTHUMG00000195825.1	chr3	HAVANA	gene	157579694	157587495	-	-2.69935	-3.76762	-3.96046	0.00274391	0.0948227	-1.32414
ENSG00000086544.4	protein_coding	ITPKC	2	OTTHUMG00000182688.3	chr19	HAVANA	gene	40717112	40740860	+	1.21694	4.73919	4.15997	0.00199651	0.0891794	-1.32666
ENSG00000281706.6	lncRNA	LINC01012	2	OTTHUMG00000189539.4	chr6	HAVANA	gene	27687617	27715556	+	-3.47645	0.283653	-4.06454	0.00232294	0.0907597	-1.32718
ENSG00000162804.15	protein_coding	SNED1	1	OTTHUMG00000151803.4	chr2	HAVANA	gene	240998618	241095568	+	3.28753	6.25876	4.15215	0.00202134	0.0891794	-1.33376
ENSG00000284738.3	lncRNA	ENSG00000284738	2	OTTHUMG00000192262.1	chr1	HAVANA	gene	153923180	153935798	+	-3.0402	-1.83605	-3.96201	0.0027371	0.0948227	-1.33572
ENSG00000230068.2	lncRNA	CDC42-IT1	2	OTTHUMG00000002890.2	chr1	HAVANA	gene	22059197	22064199	+	-1.85921	0.784034	-4.02764	0.00246386	0.0913304	-1.3389
ENSG00000165805.10	protein_coding	C12orf50	2	OTTHUMG00000169869.4	chr12	HAVANA	gene	87980035	88034037	-	-2.6464	-3.78774	-3.95025	0.00278933	0.0952071	-1.33914
ENSG00000271392.2	lncRNA	ENSG00000271392	2	OTTHUMG00000188388.1	chr17	HAVANA	gene	35757191	35764875	-	-2.52716	-1.93371	-3.9597	0.00274726	0.0948227	-1.33919
ENSG00000244534.3	misc_RNA	RN7SL211P	3	NA	chr2	ENSEMBL	gene	64906863	64907138	-	-2.65574	-3.99478	-3.95127	0.00278476	0.0952071	-1.33985
ENSG00000302644.1	lncRNA	ENSG00000302644	2	NA	chr8	HAVANA	gene	141346724	141353428	+	-2.65574	-3.99478	-3.95127	0.00278476	0.0952071	-1.33985
ENSG00000136872.21	protein_coding	ALDOB	2	OTTHUMG00000020378.8	chr9	HAVANA	gene	101420560	101449664	-	5.95163	-0.412379	3.95643	0.00276174	0.0950127	-1.3437
ENSG00000298256.1	lncRNA	ENSG00000298256	2	NA	chr10	HAVANA	gene	62240030	62240145	-	-2.88389	-3.63457	-3.94567	0.00280991	0.0952692	-1.34414
ENSG00000161800.13	protein_coding	RACGAP1	1	OTTHUMG00000169811.7	chr12	HAVANA	gene	49976923	50033136	-	-1.32146	3.6045	-4.16328	0.00198606	0.0891794	-1.34527
ENSG00000278250.1	misc_RNA	Metazoa_SRP	3	NA	chr12	ENSEMBL	gene	120018900	120019261	+	-2.75328	-2.87648	-3.9474	0.00280215	0.0952692	-1.34628
ENSG00000112486.18	protein_coding	CCR6	2	OTTHUMG00000016015.2	chr6	HAVANA	gene	167111807	167139141	+	-4.12003	-1.87747	-3.96849	0.00270875	0.0944736	-1.34659
ENSG00000210117.1	Mt_tRNA	MT-TW	3	NA	chrM	ENSEMBL	gene	5512	5579	+	-5.13144	-0.550239	-4.00643	0.00254886	0.0915696	-1.34668
ENSG00000301917.1	lncRNA	ENSG00000301917	2	NA	chr18	HAVANA	gene	32411490	32413236	-	3.77179	-2.08928	3.96017	0.0027452	0.0948227	-1.34821
ENSG00000300104.1	lncRNA	ENSG00000300104	2	NA	chr17	HAVANA	gene	47705609	47721586	-	-2.81286	-3.34071	-3.93821	0.00284387	0.0952692	-1.35528
ENSG00000094804.12	protein_coding	CDC6	2	OTTHUMG00000133324.7	chr17	HAVANA	gene	40287879	40304657	+	-2.63149	1.62557	-4.07757	0.00227525	0.0907597	-1.35614
ENSG00000086991.13	protein_coding	NOX4	2	OTTHUMG00000167298.3	chr11	HAVANA	gene	89324353	89498187	-	5.14212	4.02316	3.97685	0.00267262	0.0937515	-1.3563
ENSG00000234771.3	lncRNA	SLC25A25-AS1	2	OTTHUMG00000020737.2	chr9	HAVANA	gene	128108581	128118693	-	-1.24827	2.73251	-4.10537	0.00217688	0.0902476	-1.35845
ENSG00000241357.1	lncRNA	ENSG00000241357	2	OTTHUMG00000159538.1	chr7	HAVANA	gene	100435257	100436510	+	-2.81239	-3.04888	-3.93512	0.00285803	0.0952692	-1.35971
ENSG00000145451.13	protein_coding	GLRA3	1	OTTHUMG00000149816.3	chr4	HAVANA	gene	174636920	174829247	-	-4.10276	-2.03614	-3.95376	0.00277361	0.0950979	-1.36063
ENSG00000219027.2	processed_pseudogene	RPS3AP2	1	OTTHUMG00000044469.2	chr16	HAVANA	gene	1477830	1478583	+	-2.53927	-4.01542	-3.93704	0.00284924	0.0952692	-1.36066
ENSG00000303741.1	lncRNA	ENSG00000303741	2	NA	chr14	HAVANA	gene	22851694	22872694	-	-2.56764	-2.92943	-3.93466	0.00286015	0.0952692	-1.36131
ENSG00000230928.1	lncRNA	ENSG00000230928	2	OTTHUMG00000018875.1	chr10	HAVANA	gene	98252023	98256575	+	-2.23677	-1.02115	-3.95515	0.00276742	0.0950878	-1.3614
ENSG00000289115.2	lncRNA	ENSG00000289115	2	NA	chr19	HAVANA	gene	42075372	42075872	-	-3.18708	-2.81043	-3.93508	0.00285825	0.0952692	-1.36225
ENSG00000291079.2	lncRNA	SDHAP3	2	NA	chr5	HAVANA	gene	1541607	1634036	-	-1.90801	6.82051	-4.27032	0.00167832	0.0872545	-1.3672
ENSG00000279943.1	TEC	FLJ38576	2	OTTHUMG00000187206.2	chr4	HAVANA	gene	186189032	186191490	-	-2.05362	-1.68102	-3.93612	0.00285345	0.0952692	-1.36826
ENSG00000281376.1	lncRNA	ABALON	2	OTTHUMG00000189574.1	chr20	HAVANA	gene	31721507	31723409	+	-2.91167	-3.0731	-3.92881	0.00288722	0.095455	-1.36853
ENSG00000302020.1	lncRNA	ENSG00000302020	2	NA	chr14	HAVANA	gene	105480336	105481649	-	-2.75	-3.35628	-3.92864	0.00288803	0.095455	-1.36888
ENSG00000168078.10	protein_coding	PBK	1	OTTHUMG00000102113.6	chr8	HAVANA	gene	27809624	27838082	-	-3.84024	-0.85076	-3.98455	0.00263982	0.0930749	-1.37021
ENSG00000260096.1	transcribed_unprocessed_pseudogene	DNM1P33	2	OTTHUMG00000173034.1	chr15	HAVANA	gene	74062780	74063785	+	-2.57705	-4.22246	-3.93107	0.00287677	0.095455	-1.37148
ENSG00000121152.10	protein_coding	NCAPH	1	OTTHUMG00000130451.6	chr2	HAVANA	gene	96335766	96377091	+	-2.51101	1.64209	-4.06724	0.00231299	0.0907597	-1.3715
ENSG00000138613.14	protein_coding	APH1B	1	OTTHUMG00000132863.5	chr15	HAVANA	gene	63276018	63309126	+	1.33057	4.35295	4.10671	0.00217227	0.0902476	-1.37286
ENSG00000099785.11	protein_coding	MARCHF2	2	OTTHUMG00000182282.4	chr19	HAVANA	gene	8413270	8439017	+	1.34639	4.63488	4.11393	0.00214751	0.0902476	-1.37358
ENSG00000294498.1	lncRNA	ENSG00000294498	2	NA	chr12	HAVANA	gene	132762145	132771435	+	-1.88785	-1.35183	-3.93991	0.00283608	0.0952692	-1.37402
ENSG00000142694.7	protein_coding	EVA1B	2	OTTHUMG00000007867.1	chr1	HAVANA	gene	36322030	36324154	-	2.63292	2.89876	3.99228	0.00260729	0.0923126	-1.37403
ENSG00000298647.1	lncRNA	ENSG00000298647	2	NA	chr5	HAVANA	gene	139637675	139638595	-	-2.70868	-3.30669	-3.92409	0.00290928	0.095455	-1.37507
ENSG00000079482.14	protein_coding	OPHN1	2	OTTHUMG00000021744.2	chrX	HAVANA	gene	67949349	68433913	-	1.33973	5.49462	4.15936	0.00199842	0.0891794	-1.37689
ENSG00000122642.11	protein_coding	FKBP9	1	OTTHUMG00000097847.4	chr7	HAVANA	gene	32957404	33006930	+	1.71127	6.17362	4.17815	0.00193998	0.0887537	-1.37984
ENSG00000305730.1	lncRNA	ENSG00000305730	2	NA	chr13	HAVANA	gene	102839524	102846569	-	-2.96948	-2.60006	-3.92439	0.00290786	0.095455	-1.3814
ENSG00000279520.1	TEC	ENSG00000279520	2	OTTHUMG00000177154.1	chr16	HAVANA	gene	2516658	2517999	+	-2.25855	1.37992	-4.03932	0.00241829	0.0913304	-1.38428
ENSG00000287789.1	lncRNA	ENSG00000287789	2	OTTHUMG00000195559.1	chr6	HAVANA	gene	90073051	90079734	+	-2.79808	-4.07958	-3.91641	0.0029455	0.09611	-1.38903
ENSG00000208772.1	snoRNA	SNORD94	3	NA	chr2	ENSEMBL	gene	86135870	86136006	+	-1.39631	2.09293	-4.04869	0.0023824	0.0911029	-1.3891
ENSG00000227051.7	protein_coding	C14orf132	1	OTTHUMG00000171393.3	chr14	HAVANA	gene	96039362	96093971	+	3.74788	3.01382	3.95075	0.00278707	0.0952071	-1.39202
ENSG00000258593.2	lncRNA	ENSG00000258593	2	OTTHUMG00000170762.2	chr14	HAVANA	gene	104857792	104858836	-	-2.59996	-2.68819	-3.91448	0.00295469	0.0961424	-1.39398
ENSG00000144395.18	protein_coding	CCDC150	2	OTTHUMG00000154475.6	chr2	HAVANA	gene	196639554	196763490	+	-1.22767	1.70283	-4.02284	0.00248283	0.0913304	-1.40017
ENSG00000271991.4	lncRNA	TTC32-DT	2	OTTHUMG00000185562.2	chr2	HAVANA	gene	19901333	19903501	+	-2.51619	-2.86804	-3.90757	0.00298784	0.0965941	-1.4013
ENSG00000301840.1	lncRNA	ENSG00000301840	2	NA	chr3	HAVANA	gene	157162596	157175973	-	-2.86959	-2.73001	-3.90733	0.00298895	0.0965941	-1.40333
ENSG00000112984.12	protein_coding	KIF20A	2	OTTHUMG00000129195.4	chr5	HAVANA	gene	138178719	138187723	+	-4.24508	0.0997757	-4.00499	0.00255476	0.0915696	-1.40442
ENSG00000290838.2	lncRNA	NCF1B	2	NA	chr7	HAVANA	gene	73220583	73236006	+	-3.64725	-0.927473	-3.94505	0.00281272	0.0952692	-1.40731
ENSG00000250050.1	unprocessed_pseudogene	MTND4P9	2	OTTHUMG00000160336.1	chr4	HAVANA	gene	25718082	25719745	-	-3.29211	-3.37448	-3.90108	0.00301927	0.0973665	-1.41037
ENSG00000117724.15	protein_coding	CENPF	2	OTTHUMG00000036955.2	chr1	HAVANA	gene	214603185	214664574	+	-3.74862	3.63328	-4.15179	0.00202248	0.0891794	-1.4129
ENSG00000222078.1	misc_RNA	RN7SKP110	3	NA	chr6	ENSEMBL	gene	90001222	90001506	-	-2.27522	-0.520139	-3.93235	0.00287082	0.0954155	-1.41388
ENSG00000277452.1	misc_RNA	RN7SL473P	3	NA	chr1	ENSEMBL	gene	150566562	150566860	-	-2.05993	-0.658836	-3.93501	0.00285857	0.0952692	-1.41674
ENSG00000051128.19	protein_coding	HOMER3	2	OTTHUMG00000182995.3	chr19	HAVANA	gene	18929201	18941261	-	1.5662	3.53378	4.00562	0.00255218	0.0915696	-1.42529
ENSG00000162032.16	protein_coding	SPSB3	2	OTTHUMG00000176746.3	chr16	HAVANA	gene	1776712	1793700	-	1.3146	5.01568	4.10419	0.00218098	0.0902476	-1.4265
ENSG00000251513.3	lncRNA	LIX1-AS1	1	OTTHUMG00000162866.2	chr5	HAVANA	gene	97089075	97439742	+	-2.53474	-0.14137	-3.93498	0.0028587	0.0952692	-1.42799
ENSG00000131747.15	protein_coding	TOP2A	1	OTTHUMG00000155008.4	chr17	HAVANA	gene	40388525	40417896	-	-4.43476	3.27539	-4.13543	0.00207554	0.0898515	-1.43014
ENSG00000237649.8	protein_coding	KIFC1	2	OTTHUMG00000031209.5	chr6	HAVANA	gene	33391823	33409896	+	-2.8586	1.38608	-4.0366	0.00242885	0.0913304	-1.43028
ENSG00000186638.17	protein_coding	KIF24	2	OTTHUMG00000019810.6	chr9	HAVANA	gene	34252380	34329268	-	-1.59388	1.50983	-3.99631	0.0025905	0.0921494	-1.43138
ENSG00000173275.13	protein_coding	ZNF449	2	OTTHUMG00000022478.2	chrX	HAVANA	gene	135344796	135363413	+	1.13061	4.23966	4.06567	0.00231877	0.0907597	-1.43646
ENSG00000276651.1	lncRNA	ENSG00000276651	2	OTTHUMG00000173093.1	chr15	HAVANA	gene	63500737	63503083	-	-2.05537	-1.98691	-3.88776	0.00308493	0.0982327	-1.43662
ENSG00000008516.19	protein_coding	MMP25	2	OTTHUMG00000177475.2	chr16	HAVANA	gene	3046062	3060729	+	-2.28211	0.863294	-3.98425	0.00264108	0.0930749	-1.43809
ENSG00000295327.1	lncRNA	ENSG00000295327	2	NA	chr2	HAVANA	gene	111534097	111535141	+	-2.79836	-3.85587	-3.87813	0.00313336	0.0988423	-1.44137
ENSG00000113721.14	protein_coding	PDGFRB	1	OTTHUMG00000130053.5	chr5	HAVANA	gene	150113839	150155872	-	4.91335	8.22834	4.13062	0.00209141	0.0899599	-1.44188
ENSG00000289119.2	lncRNA	ENSG00000289119	2	NA	chr16	HAVANA	gene	48610289	48611254	+	-2.62153	-2.6947	-3.87838	0.00313206	0.0988423	-1.44313
ENSG00000261644.4	lncRNA	CYLD-AS1	2	OTTHUMG00000173403.2	chr16	HAVANA	gene	50727417	50742951	-	-2.32847	0.611604	-3.95969	0.00274731	0.0948227	-1.4435
ENSG00000218730.1	processed_pseudogene	ENSG00000218730	1	OTTHUMG00000015215.1	chr6	HAVANA	gene	90116700	90117105	-	-2.37024	-0.156594	-3.92481	0.00290592	0.095455	-1.44373
ENSG00000235919.6	lncRNA	ASH1L-AS1	2	OTTHUMG00000014012.3	chr1	HAVANA	gene	155562026	155570755	+	-1.42664	3.00386	-4.07104	0.00229903	0.0907597	-1.44788
ENSG00000150637.9	protein_coding	CD226	2	OTTHUMG00000132809.6	chr18	HAVANA	gene	69831158	69961803	-	-2.44169	2.57275	-4.05584	0.00235539	0.0909099	-1.45463
ENSG00000219665.8	lncRNA	ZNF433-AS1	2	OTTHUMG00000156428.2	chr19	HAVANA	gene	11987617	12046275	+	-1.40382	2.33844	-4.01731	0.0025049	0.0913304	-1.45726
ENSG00000296816.1	lncRNA	ENSG00000296816	2	NA	chr19	HAVANA	gene	43755088	43768720	+	-2.75657	-3.82316	-3.86687	0.00319094	0.0994903	-1.45848
ENSG00000272263.1	lncRNA	ENSG00000272263	2	OTTHUMG00000185403.1	chr3	HAVANA	gene	12832219	12832728	-	-2.64299	-2.58731	-3.86591	0.00319593	0.0994903	-1.46191
ENSG00000188505.5	protein_coding	NCCRP1	2	OTTHUMG00000182802.2	chr19	HAVANA	gene	39196964	39201884	+	-3.47354	-2.89405	-3.87146	0.00316733	0.0992712	-1.46276
ENSG00000248527.1	unprocessed_pseudogene	MTATP6P1	2	OTTHUMG00000002335.2	chr1	HAVANA	gene	633696	634376	+	-2.82196	5.67749	-4.17658	0.0019448	0.0887537	-1.46385
ENSG00000198049.7	protein_coding	AVPR1B	2	OTTHUMG00000184377.3	chr1	HAVANA	gene	206106936	206117699	-	-3.10436	-3.42754	-3.86126	0.00322005	0.099766	-1.46609
ENSG00000259194.1	lncRNA	ENSG00000259194	2	OTTHUMG00000172523.1	chr15	HAVANA	gene	51367377	51369110	+	4.01292	-1.41275	3.86463	0.00320254	0.0995771	-1.4698
ENSG00000286585.4	lncRNA	ENSG00000286585	2	OTTHUMG00000194233.1	chr3	HAVANA	gene	155854558	155863740	+	-1.77006	-1.39145	-3.8738	0.00315538	0.099069	-1.46995
ENSG00000269720.3	protein_coding	CCDC194	2	OTTHUMG00000191663.1	chr19	HAVANA	gene	17387196	17394196	-	-1.59394	0.551444	-3.93719	0.00284853	0.0952692	-1.47136
ENSG00000276012.1	lncRNA	ENSG00000276012	2	OTTHUMG00000188138.1	chr13	HAVANA	gene	101717564	101723106	+	3.86608	-1.70362	3.86251	0.00321355	0.0997153	-1.47309
ENSG00000255833.2	protein_coding	TIFAB	2	OTTHUMG00000129140.3	chr5	HAVANA	gene	135444226	135452351	-	-4.37812	-1.73	-3.89052	0.00307122	0.0980673	-1.47401
ENSG00000125462.21	lncRNA	MIR9-1HG	2	OTTHUMG00000031022.5	chr1	HAVANA	gene	156404243	156456987	-	-2.82474	-0.672391	-3.91145	0.00296918	0.0963652	-1.47638
ENSG00000163376.11	protein_coding	KBTBD8	2	OTTHUMG00000158779.2	chr3	HAVANA	gene	66998307	67011210	+	-2.82512	2.28227	-4.0303	0.0024534	0.0913304	-1.47684
ENSG00000210112.1	Mt_tRNA	MT-TM	3	NA	chrM	ENSEMBL	gene	4402	4469	+	-4.11065	-1.9444	-3.87586	0.00314487	0.0989997	-1.47689
ENSG00000121716.21	protein_coding	PILRB	2	OTTHUMG00000155363.11	chr7	HAVANA	gene	100352176	100367831	+	-1.28493	3.54312	-4.07292	0.00229214	0.0907597	-1.47747
ENSG00000119899.13	protein_coding	SLC17A5	2	OTTHUMG00000015039.2	chr6	HAVANA	gene	73593379	73653992	-	1.28804	4.42443	4.04349	0.00240227	0.0913304	-1.48083
ENSG00000261335.2	lncRNA	ENSG00000261335	2	OTTHUMG00000176088.1	chr17	HAVANA	gene	76671896	76673658	+	-3.24932	-2.64936	-3.85755	0.00323945	0.100067	-1.48108
ENSG00000003436.16	protein_coding	TFPI	2	OTTHUMG00000132634.8	chr2	HAVANA	gene	187464230	187565760	-	2.57876	6.83661	4.10649	0.00217302	0.0902476	-1.48143
ENSG00000288681.1	protein_coding	ENSG00000288681	2	NA	chr11	HAVANA	gene	308408	315272	+	3.00049	-1.68406	3.85515	0.00325207	0.100194	-1.48194
ENSG00000231177.4	lncRNA	LINC00852	2	OTTHUMG00000155362.1	chr3	HAVANA	gene	10284419	10285746	+	-1.54061	1.54519	-3.96335	0.00273118	0.0948205	-1.4844
ENSG00000112514.18	protein_coding	CUTA	2	OTTHUMG00000031254.8	chr6	HAVANA	gene	33416442	33418317	-	1.21092	4.80203	4.05747	0.00234928	0.0907977	-1.48834
ENSG00000198899.2	protein_coding	MT-ATP6	3	NA	chrM	ENSEMBL	gene	8527	9207	+	-2.66594	8.73354	-4.23094	0.00178523	0.0874234	-1.48947
ENSG00000286855.1	lncRNA	ENSG00000286855	2	OTTHUMG00000195051.1	chr7	HAVANA	gene	79335780	79357594	-	3.1706	0.166023	3.84439	0.00330928	0.101442	-1.49089
ENSG00000274737.1	lncRNA	ENSG00000274737	2	OTTHUMG00000187387.2	chr12	HAVANA	gene	47817451	47817966	-	-1.87339	0.590814	-3.92039	0.00292667	0.0955982	-1.4917
ENSG00000258623.2	lncRNA	ENSG00000258623	2	OTTHUMG00000171759.1	chr14	HAVANA	gene	68626404	68685565	-	-2.38485	0.189562	-3.92476	0.00290615	0.095455	-1.49307
ENSG00000200629.1	misc_RNA	RNY1P11	3	NA	chr7	ENSEMBL	gene	129164849	129164961	+	-2.66385	-3.77107	-3.84072	0.00332906	0.10153	-1.49481
ENSG00000235527.8	lncRNA	HIPK1-AS1	1	OTTHUMG00000011982.4	chr1	HAVANA	gene	113911900	113929551	-	-2.95303	-1.67837	-3.85889	0.00323245	0.0999954	-1.49509
ENSG00000165801.10	protein_coding	ARHGEF40	2	OTTHUMG00000171359.3	chr14	HAVANA	gene	21070273	21090248	+	1.97581	5.67076	4.07322	0.00229106	0.0907597	-1.49928
ENSG00000187912.12	protein_coding	CLEC17A	2	OTTHUMG00000169312.1	chr19	HAVANA	gene	14583084	14612035	+	-4.8957	0.359472	-3.95838	0.0027531	0.0948227	-1.50523
ENSG00000260806.2	lncRNA	PAPOLA-DT	2	OTTHUMG00000171440.1	chr14	HAVANA	gene	96500810	96502342	-	-2.96786	-2.59166	-3.83696	0.00334941	0.10185	-1.50536
ENSG00000207827.1	miRNA	MIR30A	3	NA	chr6	ENSEMBL	gene	71403551	71403621	-	2.87266	-2.01805	3.84144	0.00332515	0.10153	-1.50617
ENSG00000290735.2	lncRNA	ENSG00000290735	2	NA	chr1	HAVANA	gene	143874941	143904650	-	-2.54333	-4.01542	-3.83379	0.00336666	0.101885	-1.5062
ENSG00000148773.14	protein_coding	MKI67	2	OTTHUMG00000019255.2	chr10	HAVANA	gene	128096659	128126423	-	-4.06025	4.05962	-4.1215	0.00212186	0.0901507	-1.5064
ENSG00000178038.17	protein_coding	ALS2CL	2	OTTHUMG00000128673.8	chr3	HAVANA	gene	46668995	46693704	-	1.20467	5.79973	4.10088	0.00219247	0.0902476	-1.50997
ENSG00000214274.10	protein_coding	ANG	1	OTTHUMG00000029576.3	chr14	HAVANA	gene	20684177	20698971	+	2.91992	1.95264	3.86607	0.00319507	0.0994903	-1.5103
ENSG00000309733.1	lncRNA	ENSG00000309733	2	NA	chr6	HAVANA	gene	32619341	32623123	-	-3.17754	-3.65496	-3.83029	0.00338584	0.102039	-1.51104
ENSG00000149534.9	protein_coding	MS4A2	2	OTTHUMG00000167239.3	chr11	HAVANA	gene	60088261	60098467	+	6.21017	0.343475	3.8313	0.00338033	0.101979	-1.51179
ENSG00000235790.8	lncRNA	PEF1-AS1	2	OTTHUMG00000003881.6	chr1	HAVANA	gene	31642599	31660162	+	-1.98387	-1.89186	-3.83491	0.00336059	0.101884	-1.51248
ENSG00000085063.18	protein_coding	CD59	1	OTTHUMG00000192410.4	chr11	HAVANA	gene	33703010	33736479	-	1.88777	7.83429	4.14007	0.00206034	0.0898515	-1.51291
ENSG00000162063.13	protein_coding	CCNF	2	OTTHUMG00000128858.3	chr16	HAVANA	gene	2429394	2458854	+	-2.00734	2.436	-4.00355	0.00256067	0.0916232	-1.51306
ENSG00000273580.1	unprocessed_pseudogene	ENSG00000273580	2	OTTHUMG00000187667.1	chr7	HAVANA	gene	35933888	35934569	+	-3.43801	-3.61752	-3.82574	0.00341097	0.102399	-1.5167
ENSG00000272426.2	lncRNA	ENSG00000272426	2	OTTHUMG00000185683.1	chr1	HAVANA	gene	16904183	16904841	-	-2.68337	-3.51478	-3.82546	0.00341249	0.102399	-1.51673
ENSG00000106927.12	protein_coding	AMBP	2	OTTHUMG00000020534.5	chr9	HAVANA	gene	114060127	114078328	-	5.4273	-0.749785	3.83145	0.00337951	0.101979	-1.51745
ENSG00000237436.2	lncRNA	CAMTA1-DT	2	OTTHUMG00000001213.1	chr1	HAVANA	gene	6783892	6784843	-	-2.28141	-2.83225	-3.82427	0.00341913	0.102399	-1.51861
ENSG00000273768.1	snRNA	RNVU1-29	3	NA	chr1	ENSEMBL	gene	146376807	146376970	+	-2.90976	-1.0293	-3.84998	0.00327946	0.100732	-1.51933
ENSG00000248994.3	lncRNA	ENSG00000248994	1	OTTHUMG00000161603.1	chr5	HAVANA	gene	1927877	2119926	+	7.74791	1.88558	3.82469	0.00341678	0.102399	-1.51959
ENSG00000279692.1	TEC	ENSG00000279692	2	OTTHUMG00000176097.1	chr17	HAVANA	gene	81395609	81397144	-	3.47325	-2.2721	3.83524	0.00335877	0.101884	-1.51971
ENSG00000112210.12	protein_coding	RAB23	2	OTTHUMG00000014918.4	chr6	HAVANA	gene	57186992	57222307	-	2.26642	4.4414	3.97327	0.00268801	0.0940741	-1.52011
ENSG00000158163.15	protein_coding	DZIP1L	2	OTTHUMG00000159819.4	chr3	HAVANA	gene	138061990	138115818	-	2.13069	4.46744	4.00465	0.00255616	0.0915696	-1.52078
ENSG00000237491.11	lncRNA	LINC01409	2	OTTHUMG00000002404.21	chr1	HAVANA	gene	778739	810066	+	-1.49522	1.06782	-3.9232	0.00291344	0.095474	-1.52197
ENSG00000250995.1	processed_pseudogene	TMEM30BP1	2	OTTHUMG00000022257.1	chrX	HAVANA	gene	118769796	118770857	+	1.62088	1.40089	3.86829	0.00318361	0.0994903	-1.52342
ENSG00000148175.13	protein_coding	STOM	2	OTTHUMG00000020590.3	chr9	HAVANA	gene	121338987	121370304	-	2.00751	7.5598	4.12735	0.0021023	0.0899599	-1.52425
ENSG00000233860.3	lncRNA	SHROOM3-AS1	1	OTTHUMG00000157074.4	chr4	HAVANA	gene	76624149	76802480	-	4.35721	-1.93169	3.82733	0.00340215	0.102327	-1.52645
ENSG00000305830.1	lncRNA	ENSG00000305830	2	NA	chr11	HAVANA	gene	65413311	65422893	-	-1.87363	0.663946	-3.89196	0.00306407	0.0979792	-1.52806
ENSG00000135747.11	protein_coding	ZNF670-ZNF695	2	OTTHUMG00000187277.1	chr1	HAVANA	gene	246945547	247078811	-	-3.19246	-2.79925	-3.82355	0.00342314	0.102399	-1.5303
ENSG00000306027.1	lncRNA	ENSG00000306027	2	NA	chr3	HAVANA	gene	4986209	4987009	-	-3.35909	-2.99558	-3.81877	0.0034498	0.102423	-1.53067
ENSG00000301519.1	lncRNA	ENSG00000301519	2	NA	chr1	HAVANA	gene	203279173	203287467	-	-3.01186	-2.916	-3.8207	0.00343897	0.102421	-1.53169
ENSG00000261219.1	lncRNA	ENSG00000261219	2	OTTHUMG00000176410.1	chr15	HAVANA	gene	57720295	57720928	+	-2.47808	-2.871	-3.81645	0.0034628	0.102423	-1.53469
ENSG00000267749.1	lncRNA	ENSG00000267749	2	OTTHUMG00000180438.1	chr19	HAVANA	gene	2641838	2643853	-	-2.85153	0.174915	-3.8901	0.00307328	0.0980673	-1.53652
ENSG00000289277.2	lncRNA	ENSG00000289277	2	NA	chr15	HAVANA	gene	44241591	44288655	-	-2.25173	-2.23501	-3.81588	0.00346601	0.102423	-1.53785
ENSG00000107863.20	protein_coding	ARHGAP21	1	OTTHUMG00000017825.8	chr10	HAVANA	gene	24583609	24723887	-	1.22571	7.32438	4.12725	0.0021026	0.0899599	-1.53817
ENSG00000229388.2	lncRNA	TAF12-DT	1	OTTHUMG00000003649.2	chr1	HAVANA	gene	28643159	28648829	+	-3.03299	-0.978724	-3.84077	0.00332876	0.10153	-1.53943
ENSG00000111799.22	protein_coding	COL12A1	1	OTTHUMG00000015051.8	chr6	HAVANA	gene	75084326	75206267	-	5.03984	7.95363	4.0401	0.00241529	0.0913304	-1.54063
ENSG00000297145.1	lncRNA	ENSG00000297145	2	NA	chr4	HAVANA	gene	114596901	114598976	-	-2.81989	-3.55104	-3.80764	0.00351278	0.103202	-1.54326
ENSG00000134853.12	protein_coding	PDGFRA	2	OTTHUMG00000128699.6	chr4	HAVANA	gene	54229280	54298245	+	5.49199	6.30152	3.92777	0.00289208	0.095455	-1.54721
ENSG00000147206.17	protein_coding	NXF3	2	OTTHUMG00000022088.3	chrX	HAVANA	gene	103075810	103093143	-	4.78969	-1.66697	3.81092	0.00349405	0.102851	-1.54756
ENSG00000207008.1	snoRNA	SNORA54	3	NA	chr11	ENSEMBL	gene	2963771	2963893	-	-1.9424	2.82137	-4.00819	0.0025417	0.0915696	-1.54948
ENSG00000121380.12	protein_coding	BCL2L14	1	OTTHUMG00000159528.5	chr12	HAVANA	gene	12049844	12211084	+	-3.95348	-2.14966	-3.83367	0.00336732	0.101885	-1.55037
ENSG00000119681.12	protein_coding	LTBP2	1	OTTHUMG00000171476.4	chr14	HAVANA	gene	74498183	74612378	-	3.44616	7.78604	4.09195	0.00222381	0.0905563	-1.55072
ENSG00000171560.18	protein_coding	FGA	2	OTTHUMG00000150330.6	chr4	HAVANA	gene	154583126	154590742	-	6.72243	2.28772	3.80037	0.00355456	0.103728	-1.55331
ENSG00000110799.14	protein_coding	VWF	2	OTTHUMG00000168265.4	chr12	HAVANA	gene	5948877	6124770	-	5.20379	8.59701	4.05991	0.00234017	0.0907977	-1.55341
ENSG00000107872.14	protein_coding	FBXL15	2	OTTHUMG00000018957.7	chr10	HAVANA	gene	102419189	102423136	+	1.41791	2.70048	3.89698	0.00303931	0.097684	-1.5545
ENSG00000269421.1	unprocessed_pseudogene	ENSG00000269421	2	OTTHUMG00000183391.1	chr19	HAVANA	gene	23935220	23936173	+	-2.83575	-3.54282	-3.79778	0.00356957	0.103866	-1.55779
ENSG00000187621.17	lncRNA	TCL6	2	OTTHUMG00000149979.2	chr14	HAVANA	gene	95620914	95679833	+	-3.75641	-1.16845	-3.84246	0.00331965	0.10153	-1.55824
ENSG00000289382.3	lncRNA	ENSG00000289382	2	NA	chr8	HAVANA	gene	116651979	116654643	+	-2.98817	-3.54242	-3.79782	0.00356931	0.103866	-1.55838
ENSG00000164362.21	protein_coding	TERT	2	OTTHUMG00000090357.9	chr5	HAVANA	gene	1253147	1295068	-	-3.56466	-2.36275	-3.81755	0.00345666	0.102423	-1.56048
ENSG00000100097.12	protein_coding	LGALS1	2	OTTHUMG00000150661.2	chr22	HAVANA	gene	37675636	37679802	+	1.50558	6.7601	4.08965	0.00223194	0.0906628	-1.56118
ENSG00000224635.2	lncRNA	ENSG00000224635	2	OTTHUMG00000032445.3	chr20	HAVANA	gene	38404893	38416797	-	-2.05158	-0.389216	-3.84487	0.00330671	0.101442	-1.5631
ENSG00000254233.2	lncRNA	LINC02365	2	OTTHUMG00000163540.1	chr4	HAVANA	gene	184584086	184625807	-	-3.14383	-2.9342	-3.80147	0.00354819	0.103728	-1.56323
ENSG00000118473.23	protein_coding	SGIP1	2	OTTHUMG00000009161.9	chr1	HAVANA	gene	66533267	66751139	+	3.63498	4.21897	3.8935	0.00305644	0.0978384	-1.56437
ENSG00000156970.13	protein_coding	BUB1B	2	OTTHUMG00000129877.4	chr15	HAVANA	gene	40161023	40221123	+	-3.47805	1.08014	-3.94353	0.00281964	0.0952692	-1.56522
ENSG00000147164.12	protein_coding	SNX12	2	OTTHUMG00000021786.3	chrX	HAVANA	gene	71056332	71073426	-	1.0736	5.04724	4.02842	0.00246077	0.0913304	-1.56565
ENSG00000117114.21	protein_coding	ADGRL2	2	OTTHUMG00000009844.9	chr1	HAVANA	gene	81306147	81993932	+	2.34486	5.85561	4.02366	0.00247956	0.0913304	-1.56689
ENSG00000272843.2	lncRNA	ENSG00000272843	2	OTTHUMG00000186270.1	chr7	HAVANA	gene	72924413	72925125	-	-2.83311	-3.48068	-3.79045	0.00361236	0.104465	-1.56778
ENSG00000130962.19	protein_coding	PRRG1	1	OTTHUMG00000021360.3	chrX	HAVANA	gene	37349309	37492702	+	1.58288	3.70325	3.92579	0.00290132	0.095455	-1.57106
ENSG00000137310.13	protein_coding	TCF19	2	OTTHUMG00000031274.4	chr6	HAVANA	gene	31158331	31167159	+	-0.9978	3.29747	-3.99303	0.00260416	0.0923126	-1.57495
ENSG00000157315.5	protein_coding	TMED6	2	OTTHUMG00000137571.3	chr16	HAVANA	gene	69343250	69351786	-	-2.22423	-2.81546	-3.78998	0.00361514	0.104465	-1.57522
ENSG00000124343.14	protein_coding	XG	2	OTTHUMG00000021075.4	chrX	HAVANA	gene	2752040	2816500	+	5.17718	0.491356	3.78508	0.00364413	0.10474	-1.57534
ENSG00000285554.2	lncRNA	LINC02988	2	OTTHUMG00000193069.1	chr1	HAVANA	gene	150160726	150182935	+	-2.18973	-0.322173	-3.83127	0.00338049	0.101979	-1.58068
ENSG00000271204.1	lncRNA	ENSG00000271204	2	OTTHUMG00000185224.1	chr7	HAVANA	gene	130930209	130932206	-	-1.66588	4.44705	-4.05207	0.00236959	0.0911029	-1.58103
ENSG00000149932.17	protein_coding	TMEM219	1	OTTHUMG00000177105.9	chr16	HAVANA	gene	29940885	29973050	+	0.889775	5.28852	4.0383	0.00242226	0.0913304	-1.58237
ENSG00000205022.9	protein_coding	PABPN1L	2	OTTHUMG00000170127.2	chr16	HAVANA	gene	88863333	88866660	-	-2.93385	-3.35628	-3.78098	0.00366853	0.104952	-1.58313
ENSG00000206573.12	lncRNA	THUMPD3-AS1	2	OTTHUMG00000164357.11	chr3	HAVANA	gene	9349689	9398625	-	-1.34202	4.84637	-4.06913	0.00230602	0.0907597	-1.5833
ENSG00000272768.2	lncRNA	ENSG00000272768	2	OTTHUMG00000186249.1	chr7	HAVANA	gene	44884953	44886394	+	-2.47154	-1.00825	-3.82173	0.00343325	0.102399	-1.58477
ENSG00000254760.1	lncRNA	SIGLEC10-AS2	2	OTTHUMG00000165522.1	chr19	HAVANA	gene	51414298	51414965	+	-2.77443	-3.50616	-3.777	0.00369236	0.10504	-1.58684
ENSG00000134690.11	protein_coding	CDCA8	2	OTTHUMG00000004320.2	chr1	HAVANA	gene	37692481	37709719	+	-2.55842	0.692582	-3.89644	0.00304197	0.097684	-1.58818
ENSG00000307073.1	lncRNA	ENSG00000307073	2	NA	chr9	HAVANA	gene	112332944	112334341	+	-2.70281	-3.72633	-3.77111	0.00372803	0.10504	-1.59482
ENSG00000290039.2	lncRNA	ENSG00000290039	2	NA	chr17	HAVANA	gene	58658901	58659313	-	-4.47503	-1.91014	-3.80085	0.00355177	0.103728	-1.59522
ENSG00000127377.10	protein_coding	CRYGN	2	OTTHUMG00000157353.3	chr7	HAVANA	gene	151428832	151440813	-	3.46958	-0.856652	3.77001	0.00373471	0.10504	-1.59659
ENSG00000219438.9	protein_coding	TAFA5	1	OTTHUMG00000150308.2	chr22	HAVANA	gene	48489553	48850912	+	4.41078	0.711548	3.77181	0.00372373	0.10504	-1.59659
ENSG00000119138.5	protein_coding	KLF9	2	OTTHUMG00000019991.2	chr9	HAVANA	gene	70384604	70414657	-	2.48399	6.60923	4.03387	0.00243943	0.0913304	-1.59725
ENSG00000181617.6	protein_coding	FDCSP	2	OTTHUMG00000129393.2	chr4	HAVANA	gene	70226124	70235252	+	-5.4889	-1.56726	-3.83952	0.00333555	0.10153	-1.59845
ENSG00000306932.1	lncRNA	ENSG00000306932	2	NA	chrX	HAVANA	gene	115472877	115509419	-	-3.17586	-2.35096	-3.78249	0.0036595	0.104952	-1.60365
ENSG00000273604.2	protein_coding	EPOP	2	OTTHUMG00000188495.2	chr17	HAVANA	gene	38671703	38674957	-	-1.95047	0.793463	-3.87018	0.00317391	0.0992966	-1.60413
ENSG00000301639.1	lncRNA	ENSG00000301639	2	NA	chr1	HAVANA	gene	1407358	1408306	+	-1.72015	-0.950763	-3.78955	0.00361765	0.104465	-1.60434
ENSG00000256928.1	lncRNA	ENSG00000256928	2	OTTHUMG00000167992.1	chr11	HAVANA	gene	73395559	73396436	-	-3.24258	-3.97917	-3.76391	0.00377205	0.105479	-1.6053
ENSG00000296918.1	lncRNA	ENSG00000296918	2	NA	chr19	HAVANA	gene	13846496	13847883	-	-3.41426	-3.66217	-3.76489	0.00376602	0.105479	-1.60581
ENSG00000294656.1	lncRNA	ENSG00000294656	2	NA	chr2	HAVANA	gene	234490280	234490857	-	-3.12351	-2.25863	-3.77746	0.00368964	0.10504	-1.60874
ENSG00000233008.9	lncRNA	LINC01725	2	OTTHUMG00000009930.2	chr1	HAVANA	gene	82989545	83861130	-	-2.08992	1.79803	-3.92055	0.00292595	0.0955982	-1.6091
ENSG00000172320.4	protein_coding	OR5A1	2	OTTHUMG00000167339.2	chr11	HAVANA	gene	59436469	59451380	+	-2.90085	-4.06645	-3.75957	0.00379884	0.105567	-1.61152
ENSG00000253669.5	lncRNA	GASAL1	1	OTTHUMG00000164736.5	chr8	HAVANA	gene	102804677	102810044	+	-2.33436	-1.62548	-3.78341	0.00365401	0.104916	-1.61259
ENSG00000160948.14	protein_coding	VPS28	2	OTTHUMG00000165209.7	chr8	HAVANA	gene	144423601	144428563	-	0.847031	5.63897	4.03407	0.00243867	0.0913304	-1.61407
ENSG00000111058.8	protein_coding	ACSS3	2	OTTHUMG00000170179.6	chr12	HAVANA	gene	80936414	81261210	+	2.65578	4.07638	3.87428	0.00315294	0.099069	-1.6141
ENSG00000237640.2	lncRNA	ENSG00000237640	1	OTTHUMG00000156511.1	chr7	HAVANA	gene	99919561	99948620	+	-2.25524	-1.74904	-3.78184	0.00366337	0.104952	-1.61432
ENSG00000109906.15	protein_coding	ZBTB16	2	OTTHUMG00000168243.4	chr11	HAVANA	gene	114059041	114256765	+	5.375	7.30796	3.9393	0.00283889	0.0952692	-1.61621
ENSG00000210127.1	Mt_tRNA	MT-TA	3	NA	chrM	ENSEMBL	gene	5587	5655	-	-3.76424	-2.77145	-3.76581	0.00376039	0.105479	-1.61798
ENSG00000261226.1	lncRNA	ENSG00000261226	2	OTTHUMG00000176349.1	chr16	HAVANA	gene	88936779	88939651	-	-2.0448	1.34292	-3.888	0.00308375	0.0982327	-1.61859
ENSG00000160339.16	protein_coding	FCN2	2	OTTHUMG00000020892.2	chr9	HAVANA	gene	134880810	134887523	+	3.52667	-2.31076	3.76199	0.00378385	0.105479	-1.62006
ENSG00000279951.1	TEC	ENSG00000279951	2	OTTHUMG00000175960.1	chr13	HAVANA	gene	20092632	20094144	+	-3.55179	-3.09195	-3.75862	0.00380472	0.105567	-1.62074
ENSG00000263307.3	lncRNA	RSL1D1-DT	2	OTTHUMG00000177500.1	chr16	HAVANA	gene	11851613	11907490	+	-1.5648	0.378527	-3.81706	0.00345939	0.102423	-1.62254
ENSG00000290613.2	lncRNA	LPAL2	2	NA	chr6	HAVANA	gene	160466555	160520306	-	-1.75753	-0.559136	-3.79575	0.00358135	0.104109	-1.62405
ENSG00000158402.21	protein_coding	CDC25C	1	OTTHUMG00000129203.6	chr5	HAVANA	gene	138285269	138338355	-	-4.24639	-1.33564	-3.79856	0.00356503	0.103866	-1.62949
ENSG00000158457.6	protein_coding	TSPAN33	2	OTTHUMG00000158420.4	chr7	HAVANA	gene	129144707	129169699	+	-2.99774	2.30396	-3.93064	0.00287875	0.095455	-1.63077
ENSG00000080986.13	protein_coding	NDC80	1	OTTHUMG00000131483.5	chr18	HAVANA	gene	2571557	2616635	+	-1.87608	1.43272	-3.88189	0.00311433	0.0987549	-1.63367
ENSG00000288865.2	lncRNA	ENSG00000288865	2	NA	chr9	HAVANA	gene	72365346	72366412	+	-3.04656	-3.16368	-3.75084	0.00385336	0.106045	-1.63392
ENSG00000163736.5	protein_coding	PPBP	2	OTTHUMG00000130008.3	chr4	HAVANA	gene	73985966	73988276	-	-2.79175	-1.81295	-3.76186	0.00378466	0.105479	-1.6354
ENSG00000267257.1	lncRNA	ENSG00000267257	2	OTTHUMG00000179968.1	chr18	HAVANA	gene	58535415	58538552	+	-3.28557	-3.0466	-3.74716	0.00387654	0.106262	-1.63805
ENSG00000088812.18	protein_coding	ATRN	2	OTTHUMG00000031746.3	chr20	HAVANA	gene	3471018	3651118	+	0.834314	6.12783	4.03537	0.00243361	0.0913304	-1.63824
ENSG00000138085.18	protein_coding	ATRAID	2	OTTHUMG00000128405.7	chr2	HAVANA	gene	27212041	27217178	+	1.0055	5.25973	3.99286	0.0026049	0.0923126	-1.63832
ENSG00000308298.1	lncRNA	ENSG00000308298	2	NA	chr9	HAVANA	gene	70414008	70640314	+	2.69955	1.57981	3.77261	0.0037189	0.10504	-1.63846
ENSG00000246790.4	lncRNA	SORL1-AS1	2	OTTHUMG00000166056.1	chr11	HAVANA	gene	121413274	121453013	-	-3.06406	-0.5859	-3.80518	0.00352683	0.103415	-1.64076
ENSG00000294200.1	lncRNA	ENSG00000294200	2	NA	chr3	HAVANA	gene	156719398	156751899	+	-3.38098	-3.3719	-3.74281	0.00390419	0.106686	-1.6413
ENSG00000207313.1	snoRNA	SNORA2B	3	NA	chr12	ENSEMBL	gene	48667457	48667593	-	-2.86088	-2.28062	-3.75433	0.00383145	0.105907	-1.643
ENSG00000124193.16	protein_coding	SRSF6	2	OTTHUMG00000032502.7	chr20	HAVANA	gene	43457893	43466046	+	-1.10657	6.13446	-4.06646	0.00231588	0.0907597	-1.64354
ENSG00000296469.1	lncRNA	ENSG00000296469	2	NA	chr22	HAVANA	gene	50537708	50539664	-	-3.28682	-3.51478	-3.73922	0.00392718	0.107061	-1.64355
ENSG00000278869.3	lncRNA	ENSG00000278869	2	OTTHUMG00000189148.1	chr22	HAVANA	gene	49933184	49935331	-	-3.24282	-0.00111412	-3.82243	0.00342936	0.102399	-1.64493
ENSG00000189320.9	protein_coding	FAM180A	2	OTTHUMG00000155537.5	chr7	HAVANA	gene	135728348	135748813	-	5.99511	0.978237	3.73603	0.00394772	0.107075	-1.64527
ENSG00000286035.1	lncRNA	ENSG00000286035	2	OTTHUMG00000192940.1	chr4	HAVANA	gene	83075957	83085600	+	-2.91274	-3.15414	-3.73642	0.00394518	0.107075	-1.65117
ENSG00000248587.9	lncRNA	GDNF-AS1	2	OTTHUMG00000162110.4	chr5	HAVANA	gene	37811589	38184717	+	4.88545	-0.0651639	3.73307	0.00396686	0.107138	-1.65199
ENSG00000251221.1	lncRNA	LINC01337	1	OTTHUMG00000162533.1	chr5	HAVANA	gene	80608623	80622524	-	-2.60399	-4.00922	-3.73139	0.00397776	0.107138	-1.65205
ENSG00000145864.14	protein_coding	GABRB2	2	OTTHUMG00000130349.3	chr5	HAVANA	gene	161288429	161549044	-	5.27759	0.0207499	3.73232	0.00397171	0.107138	-1.65258
ENSG00000306726.1	lncRNA	ENSG00000306726	2	NA	chr17	HAVANA	gene	67802261	67824993	-	-2.83601	-3.57168	-3.73077	0.00398178	0.107138	-1.6532
ENSG00000243144.8	lncRNA	LINC02932	1	OTTHUMG00000156059.8	chr7	HAVANA	gene	91311368	91515427	+	2.64016	-1.58518	3.73082	0.00398144	0.107138	-1.6541
ENSG00000164556.7	protein_coding	CFAP144P1	2	OTTHUMG00000153653.1	chr7	HAVANA	gene	38685346	38687037	-	-2.8289	-3.79172	-3.72647	0.00400988	0.107182	-1.65911
ENSG00000143382.16	protein_coding	ADAMTSL4	2	OTTHUMG00000034863.6	chr1	HAVANA	gene	150549369	150560937	+	2.03537	6.65871	4.015	0.00251416	0.0913304	-1.66089
ENSG00000290099.2	lncRNA	ENSG00000290099	2	NA	chr7	HAVANA	gene	142797640	142798182	-	-2.90314	-3.58958	-3.72459	0.00402224	0.107182	-1.66284
ENSG00000151655.19	protein_coding	ITIH2	1	OTTHUMG00000017633.5	chr10	HAVANA	gene	7703316	7749520	+	4.30787	-1.78519	3.72861	0.0039959	0.107138	-1.66342
ENSG00000302670.1	lncRNA	ENSG00000302670	2	NA	chr13	HAVANA	gene	93216503	93302033	+	3.40456	-1.44278	3.72367	0.00402829	0.107182	-1.66344
ENSG00000248890.5	lncRNA	HHIP-AS1	2	OTTHUMG00000161429.2	chr4	HAVANA	gene	144642916	144661357	-	2.75042	-0.533089	3.72349	0.00402947	0.107182	-1.66427
ENSG00000257167.4	lncRNA	TMPO-AS1	2	OTTHUMG00000170209.3	chr12	HAVANA	gene	98512791	98516422	-	-1.78538	-0.0719787	-3.78503	0.0036444	0.10474	-1.66481
ENSG00000135451.13	protein_coding	TROAP	2	OTTHUMG00000169486.3	chr12	HAVANA	gene	49323236	49331731	+	-4.15506	0.460815	-3.85719	0.00324134	0.100067	-1.66509
ENSG00000270883.2	lncRNA	ENSG00000270883	2	OTTHUMG00000185259.1	chr4	HAVANA	gene	152317900	152320357	-	-3.35104	-2.89229	-3.73016	0.00398574	0.107138	-1.66614
ENSG00000304348.1	lncRNA	ENSG00000304348	2	NA	chr20	HAVANA	gene	13238213	13244415	+	3.73794	-1.1632	3.72192	0.00403987	0.107182	-1.66625
ENSG00000134363.12	protein_coding	FST	2	OTTHUMG00000131183.5	chr5	HAVANA	gene	53480626	53487134	+	4.56281	1.21646	3.72355	0.00402906	0.107182	-1.66649
ENSG00000258982.2	lncRNA	YY1-DT	2	OTTHUMG00000171545.1	chr14	HAVANA	gene	100206057	100238605	-	-2.25671	-0.672134	-3.7695	0.00373783	0.10504	-1.66715
ENSG00000167601.12	protein_coding	AXL	1	OTTHUMG00000182727.4	chr19	HAVANA	gene	41219223	41261766	+	2.22918	6.80047	4.01429	0.00251701	0.0913304	-1.6674
ENSG00000133433.11	protein_coding	GSTT2B	2	OTTHUMG00000150774.2	chr22	HAVANA	gene	23957414	23961195	-	1.65388	1.16316	3.75624	0.00381954	0.10577	-1.67025
ENSG00000126088.14	protein_coding	UROD	2	OTTHUMG00000008949.7	chr1	HAVANA	gene	45010950	45015575	+	1.10724	4.67814	3.9418	0.00282749	0.0952692	-1.67068
ENSG00000102901.13	protein_coding	CENPT	1	OTTHUMG00000173071.4	chr16	HAVANA	gene	67828157	67847811	-	1.32816	4.9459	3.95453	0.00277019	0.0950878	-1.67172
ENSG00000205364.4	protein_coding	MT1M	2	OTTHUMG00000176938.3	chr16	HAVANA	gene	56632659	56633981	+	4.59879	0.551051	3.71698	0.00407266	0.107732	-1.67311
ENSG00000235748.1	processed_pseudogene	SEPTIN14P12	1	OTTHUMG00000057657.1	chr1	HAVANA	gene	197138748	197139307	-	-2.74351	-2.78349	-3.7248	0.00402087	0.107182	-1.67369
ENSG00000263280.5	lncRNA	ENSG00000263280	2	OTTHUMG00000177363.3	chr16	HAVANA	gene	2866319	2868533	-	-2.62136	-3.33184	-3.71746	0.00406942	0.107732	-1.67401
ENSG00000088280.21	protein_coding	ASAP3	1	OTTHUMG00000003234.8	chr1	HAVANA	gene	23428563	23484637	-	3.12333	4.93902	3.86094	0.00322175	0.099766	-1.67438
ENSG00000226180.3	lncRNA	ENSG00000226180	2	OTTHUMG00000168510.2	chr16	HAVANA	gene	87693537	87696147	-	-2.32716	-0.278276	-3.77164	0.0037248	0.10504	-1.67877
ENSG00000310242.1	lncRNA	ENSG00000310242	2	NA	chr12	HAVANA	gene	47340325	47385870	-	-2.67318	-2.09515	-3.72881	0.00399457	0.107138	-1.67972
ENSG00000302185.1	lncRNA	ENSG00000302185	2	NA	chr11	HAVANA	gene	47394155	47395674	+	-2.80401	-3.62368	-3.7116	0.00410868	0.108336	-1.68093
ENSG00000279078.1	lncRNA	SND1-IT1	2	OTTHUMG00000189460.1	chr7	HAVANA	gene	127997597	128000077	+	-1.34393	2.51619	-3.89912	0.00302887	0.0975726	-1.68358
ENSG00000138080.14	protein_coding	EMILIN1	1	OTTHUMG00000097069.5	chr2	HAVANA	gene	27078615	27086403	+	3.68448	6.31851	3.94122	0.00283013	0.0952692	-1.68596
ENSG00000250508.1	lncRNA	LINC02701	2	OTTHUMG00000173014.1	chr11	HAVANA	gene	68870664	68874542	+	2.49246	-1.71929	3.70731	0.00413763	0.108336	-1.68664
ENSG00000187997.12	protein_coding	C17orf99	2	OTTHUMG00000153871.6	chr17	HAVANA	gene	78146385	78166297	+	-2.97849	-3.3719	-3.70934	0.00412388	0.108336	-1.68755
ENSG00000240350.4	lncRNA	SOCAR	1	OTTHUMG00000153695.3	chr2	HAVANA	gene	111491272	111570974	+	-2.26375	-1.66298	-3.73642	0.00394521	0.107075	-1.68809
ENSG00000040275.17	protein_coding	SPDL1	1	OTTHUMG00000130438.7	chr5	HAVANA	gene	169583636	169604778	+	-1.07094	2.40238	-3.87351	0.00315685	0.099069	-1.68868
ENSG00000289959.2	lncRNA	ENSG00000289959	2	NA	chrX	HAVANA	gene	13089740	13091298	-	-3.58856	-3.89213	-3.7081	0.00413225	0.108336	-1.68926
ENSG00000231090.2	lncRNA	MIR4422HG	2	OTTHUMG00000008214.2	chr1	HAVANA	gene	55217645	55324691	+	-2.61929	-3.53373	-3.70556	0.00414948	0.108336	-1.69001
ENSG00000291111.2	lncRNA	ENSG00000291111	2	NA	chr6	HAVANA	gene	33112409	33141221	+	-3.31869	-2.12756	-3.72988	0.00398758	0.107138	-1.69049
ENSG00000224137.3	lncRNA	LINC01857	1	OTTHUMG00000154786.1	chr2	HAVANA	gene	207662371	207679122	+	-4.2038	-0.761701	-3.77792	0.00368687	0.10504	-1.69431
ENSG00000120685.20	protein_coding	PROSER1	2	OTTHUMG00000016764.9	chr13	HAVANA	gene	39009865	39038089	-	-1.06464	4.2966	-3.96878	0.00270747	0.0944736	-1.69746
ENSG00000114771.14	protein_coding	AADAC	2	OTTHUMG00000159876.3	chr3	HAVANA	gene	151814073	151828488	+	4.1697	-1.82833	3.70322	0.00416541	0.108336	-1.69911
ENSG00000180066.12	lncRNA	LINC02870	2	OTTHUMG00000019289.3	chr10	HAVANA	gene	132444311	132449408	+	-2.92022	-3.1968	-3.70449	0.00415674	0.108336	-1.70077
ENSG00000294904.1	lncRNA	ENSG00000294904	2	NA	chr9	HAVANA	gene	99820404	99821742	-	-2.86058	-3.93311	-3.69679	0.00420957	0.108556	-1.70226
ENSG00000256139.3	lncRNA	ENSG00000256139	2	OTTHUMG00000185814.1	chr12	HAVANA	gene	109111143	109125594	+	2.4129	1.63763	3.73829	0.00393313	0.107061	-1.703
ENSG00000104899.8	protein_coding	AMH	1	OTTHUMG00000180415.5	chr19	HAVANA	gene	2249309	2252073	+	-2.4495	0.230548	-3.7755	0.00370143	0.10504	-1.70763
ENSG00000304640.1	lncRNA	ENSG00000304640	2	NA	chr10	HAVANA	gene	12348073	12349388	-	-3.17633	-3.60668	-3.6931	0.00423509	0.108663	-1.70864
ENSG00000253374.6	lncRNA	ENSG00000253374	2	OTTHUMG00000164677.1	chr8	HAVANA	gene	81439407	81579444	+	2.78625	-2.09082	3.69401	0.00422877	0.108663	-1.71116
ENSG00000133142.19	protein_coding	TCEAL4	2	OTTHUMG00000022103.8	chrX	HAVANA	gene	103576231	103587729	+	2.76215	5.31568	3.89481	0.00305003	0.0977479	-1.71446
ENSG00000231437.4	lncRNA	LINC01750	1	OTTHUMG00000011992.2	chr1	HAVANA	gene	111989770	112008406	+	3.53033	-0.815701	3.68722	0.00427613	0.109068	-1.71588
ENSG00000186522.15	protein_coding	SEPTIN10	1	OTTHUMG00000154957.6	chr2	HAVANA	gene	109542799	109614143	-	1.46479	5.9198	3.96713	0.00271468	0.0945716	-1.71739
ENSG00000197245.6	protein_coding	FAM110D	2	OTTHUMG00000007537.3	chr1	HAVANA	gene	26159079	26163962	+	3.41979	1.23277	3.69766	0.00420354	0.108556	-1.71939
ENSG00000256448.5	lncRNA	ENSG00000256448	1	OTTHUMG00000167996.1	chr11	HAVANA	gene	73405297	73410682	+	-2.82089	-0.40872	-3.76205	0.00378349	0.105479	-1.72184
ENSG00000232677.12	lncRNA	LINC00665	1	OTTHUMG00000048145.6	chr19	HAVANA	gene	36259540	36331770	-	-1.31557	3.69873	-3.94242	0.00282465	0.0952692	-1.72212
ENSG00000139926.16	protein_coding	FRMD6	1	OTTHUMG00000140294.4	chr14	HAVANA	gene	51489100	51730727	+	3.18969	5.07111	3.85634	0.0032458	0.100103	-1.7222
ENSG00000132693.12	protein_coding	CRP	2	OTTHUMG00000035344.1	chr1	HAVANA	gene	159712289	159714589	-	7.66362	1.06559	3.68219	0.00431152	0.109305	-1.72372
ENSG00000112195.9	protein_coding	TREML2	2	OTTHUMG00000016349.4	chr6	HAVANA	gene	41189749	41201149	-	-4.30212	-0.636471	-3.78788	0.00362753	0.104651	-1.7262
ENSG00000269516.7	transcribed_unprocessed_pseudogene	CYP4F23P	2	OTTHUMG00000182453.4	chr19	HAVANA	gene	15564074	15584709	+	-3.1548	-3.03503	-3.69062	0.00425233	0.10886	-1.72705
ENSG00000271856.2	lncRNA	LINC01215	2	OTTHUMG00000185591.1	chr3	HAVANA	gene	108097871	108138610	+	-4.54575	0.029833	-3.81289	0.0034829	0.102822	-1.72804
ENSG00000198650.11	protein_coding	TAT	2	OTTHUMG00000137590.4	chr16	HAVANA	gene	71565660	71577092	-	5.52875	-0.59406	3.68051	0.00432345	0.109305	-1.7282
ENSG00000065328.17	protein_coding	MCM10	2	OTTHUMG00000017694.3	chr10	HAVANA	gene	13161558	13211110	+	-2.64032	1.20666	-3.80631	0.00352037	0.103325	-1.73048
ENSG00000242797.4	lncRNA	GLYCTK-AS1	2	OTTHUMG00000158379.1	chr3	HAVANA	gene	52287103	52299221	-	-2.76749	-2.54599	-3.68471	0.00429373	0.109232	-1.73633
ENSG00000232969.2	lncRNA	ENSG00000232969	2	OTTHUMG00000086923.1	chr21	HAVANA	gene	44339376	44340692	+	-2.98807	-3.49962	-3.67612	0.00435469	0.10943	-1.73746
ENSG00000236662.1	lncRNA	ENSG00000236662	2	OTTHUMG00000018923.1	chr10	HAVANA	gene	100980507	100985614	-	-1.89719	-1.58365	-3.69781	0.0042025	0.108556	-1.7378
ENSG00000139263.12	protein_coding	LRIG3	2	OTTHUMG00000169940.2	chr12	HAVANA	gene	58872149	58920504	-	3.38691	4.81086	3.82144	0.00343486	0.102399	-1.73867
ENSG00000298566.1	lncRNA	ENSG00000298566	2	NA	chr10	HAVANA	gene	8090769	8125262	+	-2.70148	-3.67779	-3.6723	0.00438211	0.10943	-1.73887
ENSG00000228397.4	lncRNA	LINC01635	2	OTTHUMG00000002754.7	chr1	HAVANA	gene	22023851	22026215	-	-3.093	-3.78972	-3.67233	0.00438189	0.10943	-1.74
ENSG00000124074.12	protein_coding	ENKD1	1	OTTHUMG00000137550.6	chr16	HAVANA	gene	67662945	67667265	-	1.96968	2.79356	3.76424	0.00376998	0.105479	-1.7407
ENSG00000287454.2	lncRNA	ENSG00000287454	2	OTTHUMG00000195053.1	chr12	HAVANA	gene	96229563	96235650	-	-3.64547	-2.38053	-3.68992	0.00425721	0.10886	-1.74483
ENSG00000302252.1	lncRNA	ENSG00000302252	2	NA	chr9	HAVANA	gene	119009355	119012154	+	-3.91054	-2.36612	-3.70094	0.00418104	0.108442	-1.74569
ENSG00000224389.9	protein_coding	C4B	2	OTTHUMG00000031187.6	chr6	HAVANA	gene	32014795	32035418	+	3.34352	2.61954	3.72234	0.0040371	0.107182	-1.74587
ENSG00000105559.13	protein_coding	PLEKHA4	1	OTTHUMG00000183329.4	chr19	HAVANA	gene	48837092	48868617	-	1.40321	4.41399	3.87097	0.00316983	0.0992712	-1.74599
ENSG00000291139.2	lncRNA	DPY19L2P2	2	NA	chr7	HAVANA	gene	103175013	103281293	-	-1.56873	1.43024	-3.79075	0.00361062	0.104465	-1.74784
ENSG00000214900.14	lncRNA	LINC01588	2	OTTHUMG00000171567.8	chr14	HAVANA	gene	49927213	50105121	-	-2.24997	3.29556	-3.91355	0.00295915	0.0961424	-1.74801
ENSG00000133119.13	protein_coding	RFC3	2	OTTHUMG00000016715.4	chr13	HAVANA	gene	33818069	33966558	+	-1.10125	2.65136	-3.85124	0.00327278	0.100628	-1.7488
ENSG00000200816.1	snoRNA	SNORA38	3	NA	chr6	ENSEMBL	gene	31623079	31623210	+	-2.41315	-1.13679	-3.70927	0.00412437	0.108336	-1.74891
ENSG00000240184.7	protein_coding	PCDHGC3	2	OTTHUMG00000129613.8	chr5	HAVANA	gene	141475947	141512977	+	2.0831	4.55847	3.85295	0.00326371	0.100451	-1.75194
ENSG00000294396.1	lncRNA	ENSG00000294396	2	NA	chr11	HAVANA	gene	44978512	45056055	-	-2.97218	-3.58416	-3.66182	0.00445814	0.110105	-1.75463
ENSG00000248752.4	lncRNA	ENSG00000248752	2	OTTHUMG00000163018.4	chr5	HAVANA	gene	125332513	126368806	-	-2.82711	-2.27126	-3.68029	0.004325	0.109305	-1.75525
ENSG00000187773.9	protein_coding	DIPK1C	2	OTTHUMG00000156984.3	chr18	HAVANA	gene	74434775	74457944	-	3.63038	-2.59529	3.66226	0.00445492	0.110105	-1.75792
ENSG00000138658.16	protein_coding	ZGRF1	2	OTTHUMG00000132908.4	chr4	HAVANA	gene	112539333	112636995	-	-0.977452	3.82383	-3.90872	0.00298227	0.0965837	-1.75819
ENSG00000252464.1	misc_RNA	RN7SKP70	3	NA	chr5	ENSEMBL	gene	178619728	178619998	-	-1.87764	-1.34811	-3.67975	0.00432887	0.109312	-1.75973
ENSG00000269444.1	lncRNA	ENSG00000269444	2	OTTHUMG00000180793.1	chr19	HAVANA	gene	6386762	6390400	-	-2.98907	-3.22758	-3.66225	0.00445503	0.110105	-1.75999
ENSG00000267374.4	lncRNA	MIR924HG	2	OTTHUMG00000178312.57	chr18	HAVANA	gene	39113452	39800325	-	-4.19326	-0.175813	-3.77118	0.00372756	0.10504	-1.76046
ENSG00000287979.2	lncRNA	ENSG00000287979	2	OTTHUMG00000194126.1	chr1	HAVANA	gene	120844016	120850985	-	-3.85042	-1.90366	-3.69257	0.00423877	0.108663	-1.76059
ENSG00000254042.2	lncRNA	SLIT3-AS2	1	OTTHUMG00000163055.3	chr5	HAVANA	gene	168706567	168720884	+	-2.60391	-2.26314	-3.67185	0.00438534	0.10943	-1.76242
ENSG00000305807.1	lncRNA	ENSG00000305807	2	NA	chr10	HAVANA	gene	4099163	4121806	-	-2.85108	-3.78323	-3.65531	0.0045061	0.110496	-1.76356
ENSG00000263456.1	miRNA	MIR5189	3	NA	chr16	ENSEMBL	gene	88468918	88469031	+	-2.44596	-1.74124	-3.67559	0.00435847	0.10943	-1.76395
ENSG00000077942.19	protein_coding	FBLN1	2	OTTHUMG00000151340.4	chr22	HAVANA	gene	45502238	45601135	+	5.18035	7.44099	3.87982	0.0031248	0.0988423	-1.76418
ENSG00000211768.1	TR_J_gene	TRBJ2-4	2	OTTHUMG00000158888.3	chr7	HAVANA	gene	142796998	142797047	+	-2.48265	-3.58603	-3.65288	0.00452411	0.110496	-1.76543
ENSG00000287022.1	lncRNA	ENSG00000287022	2	OTTHUMG00000195424.1	chr3	HAVANA	gene	121394772	121431198	-	-3.16802	-3.66748	-3.65207	0.00453014	0.110496	-1.76819
ENSG00000290072.2	lncRNA	ENSG00000290072	2	NA	chr3	HAVANA	gene	12664300	12665317	+	-2.97127	-3.90998	-3.65128	0.00453602	0.110496	-1.76902
ENSG00000305233.1	lncRNA	ENSG00000305233	2	NA	chr16	HAVANA	gene	740650	743378	+	-2.83443	-3.20111	-3.65601	0.00450096	0.110496	-1.77198
ENSG00000160856.21	protein_coding	FCRL3	1	OTTHUMG00000019400.9	chr1	HAVANA	gene	157674321	157700769	-	-4.01738	2.23998	-3.87823	0.00313282	0.0988423	-1.77261
ENSG00000163870.16	protein_coding	TPRA1	2	OTTHUMG00000159639.9	chr3	HAVANA	gene	127571232	127598267	-	0.994136	4.68535	3.88487	0.00309939	0.0984866	-1.77337
ENSG00000241413.3	misc_RNA	RN7SL441P	3	NA	chr12	ENSEMBL	gene	109866214	109866509	-	-1.93948	-2.34794	-3.65503	0.00450818	0.110496	-1.77394
ENSG00000183598.4	protein_coding	H3C13	2	OTTHUMG00000012092.2	chr1	HAVANA	gene	149813225	149813693	-	-2.59361	0.240647	-3.75518	0.00382614	0.105857	-1.77445
ENSG00000310209.1	lncRNA	ENSG00000310209	2	NA	chr1	HAVANA	gene	203325307	203325902	+	-3.02139	-3.70848	-3.64667	0.00457056	0.110853	-1.77826
ENSG00000236021.5	lncRNA	COP1-DT	1	OTTHUMG00000034988.2	chr1	HAVANA	gene	176207344	176447919	+	-1.6254	-0.193638	-3.70002	0.00418731	0.108442	-1.77829
ENSG00000285646.3	lncRNA	ENSG00000285646	2	OTTHUMG00000193227.7	chr1	HAVANA	gene	11907940	11925009	+	-3.54659	-0.735644	-3.7002	0.00418611	0.108442	-1.77906
ENSG00000178409.14	protein_coding	BEND3	2	OTTHUMG00000015308.1	chr6	HAVANA	gene	107065182	107115515	-	-1.40126	2.21139	-3.81182	0.00348898	0.102851	-1.78198
ENSG00000229023.1	processed_pseudogene	RAB1AP1	1	OTTHUMG00000154514.1	chr2	HAVANA	gene	190992639	190993567	-	-3.11443	-0.458704	-3.73616	0.00394683	0.107075	-1.78288
ENSG00000173482.17	protein_coding	PTPRM	2	OTTHUMG00000131575.5	chr18	HAVANA	gene	7566782	8406861	+	1.99073	7.02838	3.94728	0.00280267	0.0952692	-1.78449
ENSG00000307683.1	lncRNA	ENSG00000307683	2	NA	chr20	HAVANA	gene	57410386	57415607	+	-3.16364	-3.1015	-3.64373	0.00459276	0.111035	-1.78512
ENSG00000125878.7	protein_coding	TCF15	2	OTTHUMG00000031640.2	chr20	HAVANA	gene	604257	610309	-	4.7637	-0.0059127	3.63895	0.00462899	0.111162	-1.78558
ENSG00000217159.2	processed_pseudogene	LARP1P1	1	OTTHUMG00000014424.2	chr6	HAVANA	gene	26164072	26164363	+	-3.08946	-3.17748	-3.64546	0.00457966	0.110853	-1.78719
ENSG00000047648.23	protein_coding	ARHGAP6	2	OTTHUMG00000021134.7	chrX	HAVANA	gene	11117651	11665920	-	3.66773	3.90935	3.72797	0.00400005	0.107155	-1.78765
ENSG00000064692.20	protein_coding	SNCAIP	1	OTTHUMG00000128915.7	chr5	HAVANA	gene	122311354	122464219	+	4.00122	2.84071	3.69001	0.0042566	0.10886	-1.78766
ENSG00000137804.14	protein_coding	NUSAP1	1	OTTHUMG00000193352.3	chr15	HAVANA	gene	41320794	41381050	+	-2.75182	-2.53167	-3.65235	0.00452812	0.110496	-1.78789
ENSG00000305391.1	lncRNA	ENSG00000305391	2	NA	chr17	HAVANA	gene	28645324	28646805	+	-2.58014	-3.83628	-3.63657	0.00464713	0.111421	-1.78865
ENSG00000175899.15	protein_coding	A2M	2	OTTHUMG00000150267.7	chr12	HAVANA	gene	9067664	9116229	-	3.34118	9.51158	3.99993	0.00257555	0.0919461	-1.7908
ENSG00000185432.12	protein_coding	TMT1A	2	OTTHUMG00000169484.5	chr12	HAVANA	gene	50923472	50932510	+	1.68508	5.97292	3.90903	0.00298079	0.0965837	-1.79371
ENSG00000126215.14	protein_coding	XRCC3	2	OTTHUMG00000169228.6	chr14	HAVANA	gene	103697609	103715504	-	-1.87188	2.33809	-3.83512	0.00335945	0.101884	-1.79401
ENSG00000109674.4	protein_coding	NEIL3	2	OTTHUMG00000160722.2	chr4	HAVANA	gene	177309874	177362936	+	-3.78595	-0.616324	-3.72543	0.00401669	0.107182	-1.79545
ENSG00000285128.1	lncRNA	ENSG00000285128	2	OTTHUMG00000192457.1	chr19	HAVANA	gene	44803701	44804010	+	-3.06356	-2.87476	-3.64735	0.00456545	0.110853	-1.79568
ENSG00000250829.3	lncRNA	ENSG00000250829	2	OTTHUMG00000160310.2	chr4	HAVANA	gene	186889312	186990677	+	3.50001	-0.230576	3.63083	0.0046913	0.112052	-1.79899
ENSG00000143198.13	protein_coding	MGST3	2	OTTHUMG00000034627.7	chr1	HAVANA	gene	165631213	165661796	+	1.78447	5.59415	3.88007	0.00312351	0.0988423	-1.79979
ENSG00000266423.1	miRNA	MIR3163	3	NA	chr11	ENSEMBL	gene	66934434	66934506	-	-2.91229	-2.38776	-3.6476	0.0045636	0.110853	-1.80034
ENSG00000287426.2	lncRNA	ENSG00000287426	2	OTTHUMG00000194205.1	chr11	HAVANA	gene	129732585	129814690	-	-2.50158	-3.18917	-3.63075	0.00469189	0.112052	-1.80073
ENSG00000213625.9	protein_coding	LEPROT	2	OTTHUMG00000009065.7	chr1	HAVANA	gene	65420587	65436007	+	1.29265	6.51615	3.93979	0.00283662	0.0952692	-1.80406
ENSG00000288637.1	protein_coding	ENSG00000288637	2	NA	chr4	HAVANA	gene	153152435	153415081	+	-3.33636	-3.53993	-3.62639	0.0047257	0.112234	-1.80754
ENSG00000214919.3	lncRNA	ENSG00000214919	2	OTTHUMG00000187172.1	chr3	HAVANA	gene	155742142	155743726	-	-3.07858	-3.32489	-3.63168	0.00468473	0.112052	-1.80799
ENSG00000294610.1	lncRNA	ENSG00000294610	2	NA	chr13	HAVANA	gene	109666986	109668148	-	4.11092	-2.04269	3.62198	0.00476014	0.112445	-1.81299
ENSG00000288700.3	lncRNA	ENSG00000288700	2	NA	chr3	HAVANA	gene	134485721	134951651	+	-1.85581	-0.360837	-3.67229	0.00438218	0.10943	-1.81534
ENSG00000051341.15	protein_coding	POLQ	2	OTTHUMG00000159396.2	chr3	HAVANA	gene	121431431	121545988	-	-3.18149	2.49823	-3.83989	0.00333354	0.10153	-1.81779
ENSG00000265612.1	miRNA	MIR4539	3	NA	chr14	ENSEMBL	gene	105857513	105857572	-	-3.75393	-1.94059	-3.65222	0.00452904	0.110496	-1.81843
ENSG00000310087.1	lncRNA	ENSG00000310087	2	NA	chr7	HAVANA	gene	130916365	130916701	-	-1.64912	2.29017	-3.79207	0.00360288	0.104465	-1.82023
ENSG00000139514.13	protein_coding	SLC7A1	2	OTTHUMG00000016658.6	chr13	HAVANA	gene	29509414	29595688	-	-1.03707	5.34874	-3.93364	0.00286487	0.0953221	-1.8208
ENSG00000129009.13	protein_coding	ISLR	2	OTTHUMG00000137623.7	chr15	HAVANA	gene	74173710	74176872	+	5.71851	5.25793	3.70475	0.00415497	0.108336	-1.82101
ENSG00000225548.8	lncRNA	LINC01980	2	OTTHUMG00000155653.37	chr3	HAVANA	gene	27796694	27931579	+	-2.48621	-3.02949	-3.62277	0.00475395	0.112429	-1.82212
ENSG00000309135.1	lncRNA	ENSG00000309135	2	NA	chr5	HAVANA	gene	133968658	133971914	+	-2.64339	-3.38038	-3.6176	0.0047946	0.112558	-1.82319
ENSG00000166033.13	protein_coding	HTRA1	2	OTTHUMG00000019186.4	chr10	HAVANA	gene	122458551	122514907	+	3.97963	5.85215	3.80205	0.00354483	0.103728	-1.82502
ENSG00000267783.4	lncRNA	ENSG00000267783	2	OTTHUMG00000182137.1	chr19	HAVANA	gene	14116787	14119656	+	-2.83191	-3.2096	-3.61374	0.00482519	0.112948	-1.82589
ENSG00000226238.1	lncRNA	ENSG00000226238	2	OTTHUMG00000155317.1	chr3	HAVANA	gene	17990023	17995544	+	-3.27254	-3.51051	-3.61767	0.00479409	0.112558	-1.82652
ENSG00000133812.18	protein_coding	SBF2	1	OTTHUMG00000165890.3	chr11	HAVANA	gene	9776776	10304877	-	1.75679	6.83909	3.924	0.00290971	0.095455	-1.82932
ENSG00000140948.13	protein_coding	ZCCHC14	2	OTTHUMG00000137655.4	chr16	HAVANA	gene	87406246	87493024	-	1.35936	5.83067	3.89822	0.00303328	0.0976111	-1.83007
ENSG00000139734.19	protein_coding	DIAPH3	2	OTTHUMG00000017004.7	chr13	HAVANA	gene	59665583	60163928	-	-2.61664	1.12671	-3.77591	0.00369898	0.10504	-1.8313
ENSG00000145431.11	protein_coding	PDGFC	2	OTTHUMG00000161803.5	chr4	HAVANA	gene	156760454	156971799	-	1.22088	5.40991	3.88387	0.00310442	0.0985435	-1.83601
ENSG00000289377.3	lncRNA	ENSG00000289377	2	NA	chr1	HAVANA	gene	234745771	234772888	-	-3.16802	-2.17527	-3.6273	0.00471859	0.112161	-1.84042
ENSG00000276410.5	protein_coding	H2BC3	2	OTTHUMG00000014421.2	chr6	HAVANA	gene	26042771	26043713	-	-2.33377	-0.150898	-3.68382	0.00430003	0.109232	-1.84135
ENSG00000185088.14	protein_coding	RPS27L	1	OTTHUMG00000155301.7	chr15	HAVANA	gene	63125872	63158021	-	1.05577	5.08486	3.86395	0.00320606	0.0995844	-1.8416
ENSG00000275591.5	protein_coding	XKR5	2	OTTHUMG00000153652.5	chr8	HAVANA	gene	6808517	6835524	-	-2.84436	-2.68937	-3.61542	0.0048119	0.11279	-1.84198
ENSG00000289595.2	lncRNA	ENSG00000289595	2	NA	chr12	HAVANA	gene	68804873	68806089	+	3.1169	-2.701	3.60265	0.00491427	0.113665	-1.84252
ENSG00000270802.2	processed_pseudogene	ENSG00000270802	1	OTTHUMG00000184910.2	chr19	HAVANA	gene	15338948	15339237	+	-3.08777	-2.0125	-3.62949	0.00470161	0.112108	-1.84499
ENSG00000116641.18	protein_coding	DOCK7	2	OTTHUMG00000013131.10	chr1	HAVANA	gene	62454298	62688386	-	1.24669	6.41363	3.91486	0.00295289	0.0961424	-1.84564
ENSG00000260167.2	lncRNA	ENSG00000260167	2	OTTHUMG00000176951.1	chr16	HAVANA	gene	30585770	30625360	+	-2.34364	-0.6288	-3.668	0.00441314	0.109707	-1.84602
ENSG00000164111.15	protein_coding	ANXA5	2	OTTHUMG00000133034.5	chr4	HAVANA	gene	121667946	121696995	-	1.24459	7.54753	3.94757	0.00280137	0.0952692	-1.84796
ENSG00000259652.1	lncRNA	ENSG00000259652	2	OTTHUMG00000172617.1	chr15	HAVANA	gene	77043680	77045160	+	-2.37039	-1.90325	-3.63023	0.00469589	0.11206	-1.84916
ENSG00000266913.2	lncRNA	LINC01841	2	OTTHUMG00000182164.1	chr19	HAVANA	gene	14304940	14370196	-	-2.54504	-1.90846	-3.62254	0.00475579	0.112429	-1.85061
ENSG00000134901.14	protein_coding	POGLUT2	2	OTTHUMG00000017307.4	chr13	HAVANA	gene	102784281	102799040	-	2.23865	2.02425	3.66296	0.00444981	0.110105	-1.85208
ENSG00000261202.3	lncRNA	TNRC6B-DT	2	OTTHUMG00000172747.1	chr22	HAVANA	gene	40042688	40044586	-	-2.68075	-3.79307	-3.59131	0.00500709	0.113937	-1.85375
ENSG00000182481.10	protein_coding	KPNA2	2	OTTHUMG00000179784.3	chr17	HAVANA	gene	68035636	68047364	+	-1.78762	4.56465	-3.89473	0.0030504	0.0977479	-1.85382
ENSG00000211815.3	TR_V_gene	TRAV36DV7	2	OTTHUMG00000170666.3	chr14	HAVANA	gene	22226746	22227254	+	-2.59248	-3.74697	-3.59187	0.00500241	0.113937	-1.85395
ENSG00000197301.7	lncRNA	HMGA2-AS1	1	OTTHUMG00000168956.1	chr12	HAVANA	gene	65851340	65882167	-	5.62349	2.08667	3.60008	0.00493513	0.113672	-1.85481
ENSG00000183150.8	protein_coding	GPR19	2	OTTHUMG00000168705.4	chr12	HAVANA	gene	12660890	12696207	-	-2.94413	-1.70393	-3.62504	0.00473623	0.112234	-1.85731
ENSG00000240775.1	processed_pseudogene	ENSG00000240775	1	OTTHUMG00000157549.1	chr4	HAVANA	gene	122840343	122840690	+	3.55741	-1.22117	3.58854	0.00503001	0.114294	-1.85745
ENSG00000073921.18	protein_coding	PICALM	1	OTTHUMG00000166981.5	chr11	HAVANA	gene	85957175	86069882	-	1.14006	8.32625	3.95904	0.00275018	0.0948227	-1.86412
ENSG00000206846.1	misc_RNA	Y_RNA	3	NA	chr15	ENSEMBL	gene	30673750	30673843	+	-2.57933	-3.00418	-3.5955	0.00497253	0.113678	-1.86419
ENSG00000214941.8	protein_coding	ZSWIM7	1	OTTHUMG00000059308.6	chr17	HAVANA	gene	15976560	15999717	-	1.09504	3.59281	3.75647	0.00381812	0.10577	-1.86895
ENSG00000302986.1	lncRNA	ENSG00000302986	2	NA	chr19	HAVANA	gene	44746657	44747355	-	-2.87621	-3.83628	-3.58234	0.00508177	0.114633	-1.87022
ENSG00000241429.1	processed_pseudogene	EEF1A1P25	1	OTTHUMG00000159887.1	chr3	HAVANA	gene	138825063	138826329	+	3.10063	-2.81376	3.58278	0.00507806	0.114633	-1.87033
ENSG00000295820.1	lncRNA	ENSG00000295820	2	NA	chr12	HAVANA	gene	56103810	56104406	-	-2.73935	-3.96067	-3.57862	0.00511309	0.114827	-1.87362
ENSG00000307305.1	lncRNA	ENSG00000307305	2	NA	chr22	HAVANA	gene	26445445	26451322	+	-2.78329	-3.66748	-3.58005	0.00510107	0.114785	-1.87464
ENSG00000142089.17	protein_coding	IFITM3	1	OTTHUMG00000165542.3	chr11	HAVANA	gene	319676	329475	-	2.21025	6.79063	3.88493	0.00309908	0.0984866	-1.87623
ENSG00000119673.16	protein_coding	ACOT2	1	OTTHUMG00000171608.4	chr14	HAVANA	gene	73567620	73575658	+	1.75045	2.8875	3.68666	0.00428002	0.109076	-1.87632
ENSG00000300506.1	lncRNA	ENSG00000300506	2	NA	chr17	HAVANA	gene	43246211	43253783	-	-1.59738	2.40913	-3.76969	0.00373666	0.10504	-1.87662
ENSG00000176971.4	protein_coding	FIBIN	2	OTTHUMG00000166120.2	chr11	HAVANA	gene	26994112	26997087	+	6.22528	3.1181	3.59254	0.00499688	0.113937	-1.8774
ENSG00000273160.1	lncRNA	ENSG00000273160	2	OTTHUMG00000185991.1	chr1	HAVANA	gene	167457742	167459891	-	-2.78618	-0.300336	-3.67109	0.00439082	0.10943	-1.87773
ENSG00000238317.2	snoRNA	SNORD11	3	NA	chr2	ENSEMBL	gene	202293051	202293134	+	-1.80057	-0.302173	-3.6337	0.00466913	0.111772	-1.87838
ENSG00000265052.2	misc_RNA	RN7SL622P	3	NA	chr17	ENSEMBL	gene	67977698	67977972	+	-2.05643	-2.63387	-3.58824	0.00503252	0.114294	-1.87981
ENSG00000126003.7	protein_coding	PLAGL2	2	OTTHUMG00000032210.3	chr20	HAVANA	gene	32192504	32207743	-	-1.4454	3.79141	-3.83964	0.00333487	0.10153	-1.88002
ENSG00000271917.1	lncRNA	ENSG00000271917	2	OTTHUMG00000185515.1	chr1	HAVANA	gene	164828436	164829952	+	4.12195	-0.0634745	3.56998	0.0051866	0.115062	-1.88557
ENSG00000289319.2	lncRNA	ENSG00000289319	2	NA	chr12	HAVANA	gene	65122767	65169558	-	-2.87549	-3.98165	-3.56931	0.0051924	0.115062	-1.88647
ENSG00000289848.2	lncRNA	ENSG00000289848	2	NA	chr20	HAVANA	gene	47357436	47359761	+	-2.54385	-3.73469	-3.56845	0.00519978	0.115062	-1.88715
ENSG00000278920.1	lncRNA	ENSG00000278920	2	OTTHUMG00000189271.1	chr22	HAVANA	gene	31051630	31068327	+	-2.90311	-2.15963	-3.59681	0.00496179	0.113672	-1.89062
ENSG00000011105.14	protein_coding	TSPAN9	2	OTTHUMG00000150333.7	chr12	HAVANA	gene	3077355	3286564	+	2.05777	5.2311	3.80791	0.00351124	0.103202	-1.89099
ENSG00000123473.17	protein_coding	STIL	1	OTTHUMG00000007851.4	chr1	HAVANA	gene	47250139	47314892	-	-2.48795	1.89795	-3.75872	0.00380408	0.105567	-1.89102
ENSG00000301528.1	lncRNA	ENSG00000301528	2	NA	chr19	HAVANA	gene	14375330	14376151	+	-2.92153	-3.68889	-3.56765	0.0052066	0.115062	-1.8911
ENSG00000104833.12	protein_coding	TUBB4A	1	OTTHUMG00000181829.5	chr19	HAVANA	gene	6494319	6502848	-	-2.65854	-2.30253	-3.58187	0.00508568	0.114633	-1.89139
ENSG00000185010.15	protein_coding	F8	1	OTTHUMG00000022688.16	chrX	HAVANA	gene	154835788	155026940	-	3.76477	5.83978	3.75204	0.00384579	0.106014	-1.89194
ENSG00000026559.14	protein_coding	KCNG1	2	OTTHUMG00000032745.9	chr20	HAVANA	gene	51003656	51023107	-	-2.94738	-1.88895	-3.60035	0.00493294	0.113672	-1.89207
ENSG00000113810.16	protein_coding	SMC4	1	OTTHUMG00000159006.8	chr3	HAVANA	gene	160399274	160434954	+	-1.02756	6.00943	-3.91398	0.0029571	0.0961424	-1.89221
ENSG00000268658.5	lncRNA	LINC00664	2	OTTHUMG00000182847.2	chr19	HAVANA	gene	21483374	21503238	+	-2.01585	-0.704603	-3.62582	0.00473014	0.112234	-1.89307
ENSG00000135406.15	protein_coding	PRPH	1	OTTHUMG00000167140.8	chr12	HAVANA	gene	49295147	49298686	+	3.68106	-1.48436	3.56373	0.00524048	0.115062	-1.89351
ENSG00000112562.20	protein_coding	SMOC2	2	OTTHUMG00000016050.5	chr6	HAVANA	gene	168441151	168673445	+	5.70535	5.26465	3.65035	0.004543	0.110496	-1.89423
ENSG00000286489.2	lncRNA	ENSG00000286489	2	OTTHUMG00000194296.1	chr10	HAVANA	gene	101693880	101705119	+	-2.49076	-3.81822	-3.56397	0.00523844	0.115062	-1.89492
ENSG00000279035.1	TEC	ENSG00000279035	2	OTTHUMG00000179347.1	chr17	HAVANA	gene	75130883	75133043	+	-2.83741	-2.57916	-3.58222	0.00508277	0.114633	-1.89564
ENSG00000138346.16	protein_coding	DNA2	2	OTTHUMG00000018352.6	chr10	HAVANA	gene	68414064	68472121	-	-1.13064	3.00191	-3.77622	0.00369706	0.10504	-1.89754
ENSG00000199664.1	snRNA	RNU6-1266P	3	NA	chr10	ENSEMBL	gene	77776951	77777055	-	-2.68752	-3.62368	-3.56065	0.00526729	0.115062	-1.89793
ENSG00000151500.15	protein_coding	THYN1	2	OTTHUMG00000167176.2	chr11	HAVANA	gene	134248279	134253370	-	1.01129	3.98328	3.77132	0.00372675	0.10504	-1.89799
ENSG00000266088.7	lncRNA	ENSG00000266088	2	OTTHUMG00000179655.3	chr17	HAVANA	gene	40516699	40532686	+	-3.85155	-0.538881	-3.66366	0.00444473	0.110105	-1.89885
ENSG00000275846.2	lncRNA	ENSG00000275846	2	OTTHUMG00000188367.1	chr6	HAVANA	gene	26602730	26606661	+	-3.01156	-2.60797	-3.57596	0.00513566	0.115062	-1.90057
ENSG00000135506.17	protein_coding	OS9	1	OTTHUMG00000170284.3	chr12	HAVANA	gene	57693841	57728342	+	1.04511	7.62002	3.92172	0.00292041	0.0955982	-1.90058
ENSG00000143786.8	protein_coding	CNIH3	2	OTTHUMG00000037634.4	chr1	HAVANA	gene	224434660	224740554	+	1.42701	1.88635	3.64036	0.00461822	0.111162	-1.90218
ENSG00000167994.13	protein_coding	RAB3IL1	1	OTTHUMG00000167524.4	chr11	HAVANA	gene	61897301	61920269	-	3.37444	3.56113	3.65346	0.00451984	0.110496	-1.90225
ENSG00000297769.1	lncRNA	ENSG00000297769	2	NA	chr10	HAVANA	gene	8572350	8669803	-	-2.85771	-3.90547	-3.55833	0.00528753	0.115062	-1.90259
ENSG00000138434.17	protein_coding	ITPRID2	1	OTTHUMG00000132584.5	chr2	HAVANA	gene	181891730	181930738	+	0.872397	7.06339	3.90326	0.00300867	0.097128	-1.90315
ENSG00000274751.2	lncRNA	ENSG00000274751	2	OTTHUMG00000047845.7	chr16	HAVANA	gene	1305543	1309413	-	-2.39331	-2.81909	-3.56495	0.00522996	0.115062	-1.90325
ENSG00000298597.1	lncRNA	ENSG00000298597	2	NA	chr1	HAVANA	gene	117708699	117709655	+	-3.04074	-3.66327	-3.56194	0.00525607	0.115062	-1.90393
ENSG00000288615.1	lncRNA	ENSG00000288615	2	NA	chr5	HAVANA	gene	170306557	170307606	-	-3.3394	-3.42611	-3.56796	0.00520397	0.115062	-1.90404
ENSG00000301067.1	lncRNA	ENSG00000301067	2	NA	chr19	HAVANA	gene	1021516	1021883	+	-3.23275	-1.30026	-3.60843	0.00486762	0.113483	-1.90407
ENSG00000257966.1	processed_pseudogene	OLA1P3	1	OTTHUMG00000170206.1	chr12	HAVANA	gene	55870048	55872602	-	-2.31162	-3.33184	-3.56124	0.00526215	0.115062	-1.90497
ENSG00000160683.5	protein_coding	CXCR5	2	OTTHUMG00000166345.2	chr11	HAVANA	gene	118883892	118897787	+	-5.35818	0.909541	-3.74237	0.00390705	0.106686	-1.90509
ENSG00000291037.2	lncRNA	ENSG00000291037	2	NA	chr7	HAVANA	gene	5110184	5144705	-	-2.83923	-3.18099	-3.56665	0.00521527	0.115062	-1.90549
ENSG00000184005.12	protein_coding	ST6GALNAC3	2	OTTHUMG00000009615.2	chr1	HAVANA	gene	76074746	76634603	+	2.5786	3.4651	3.67004	0.00439837	0.10943	-1.90595
ENSG00000273106.2	lncRNA	PPM1B-DT	2	OTTHUMG00000185892.1	chr2	HAVANA	gene	44116791	44168859	-	-2.48644	-3.49672	-3.55901	0.00528156	0.115062	-1.90707
ENSG00000123219.13	protein_coding	CENPK	2	OTTHUMG00000131227.5	chr5	HAVANA	gene	65517766	65563168	-	-2.58163	1.7991	-3.75274	0.00384139	0.105989	-1.90784
ENSG00000158079.16	protein_coding	PTPDC1	1	OTTHUMG00000020258.6	chr9	HAVANA	gene	94030794	94109856	+	1.11502	4.65579	3.80285	0.00354023	0.103708	-1.90839
ENSG00000147883.12	protein_coding	CDKN2B	2	OTTHUMG00000019691.4	chr9	HAVANA	gene	22002903	22009305	-	1.58421	4.25587	3.74989	0.00385935	0.106045	-1.90846
ENSG00000207741.1	miRNA	MIR590	3	NA	chr7	ENSEMBL	gene	74191198	74191294	+	-1.64285	-0.633914	-3.60415	0.00490207	0.113665	-1.90922
ENSG00000305910.1	lncRNA	ENSG00000305910	2	NA	chr9	HAVANA	gene	6680413	6681701	-	-2.40169	-3.52082	-3.55653	0.00530331	0.115321	-1.90938
ENSG00000294462.1	lncRNA	ENSG00000294462	2	NA	chr14	HAVANA	gene	104816130	104818784	+	-1.70497	-1.48418	-3.58105	0.00509264	0.114681	-1.91002
ENSG00000251131.4	lncRNA	ENSG00000251131	1	OTTHUMG00000162236.6	chr5	HAVANA	gene	43018145	43034640	+	-1.46344	-0.0520853	-3.6163	0.00480487	0.112712	-1.91131
ENSG00000117983.17	protein_coding	MUC5B	2	OTTHUMG00000166494.4	chr11	HAVANA	gene	1223066	1262172	+	-3.19631	1.06692	-3.76197	0.00378399	0.105479	-1.91235
ENSG00000290592.2	lncRNA	ENSG00000290592	2	NA	chr1	HAVANA	gene	157171116	157191963	+	-3.83992	-3.24511	-3.56453	0.00523357	0.115062	-1.91277
ENSG00000260286.4	protein_coding	ARMH2	2	OTTHUMG00000177257.3	chr6	HAVANA	gene	24797335	24798917	-	-2.96138	-3.69392	-3.55201	0.00534305	0.115771	-1.91387
ENSG00000207287.1	snRNA	RNU6-1274P	3	NA	chr10	ENSEMBL	gene	96743167	96743273	+	-2.95103	-4.16176	-3.54909	0.00536893	0.115919	-1.9154
ENSG00000289121.2	lncRNA	ENSG00000289121	2	NA	chr1	HAVANA	gene	161046010	161046972	+	-1.97562	-0.645685	-3.60144	0.00492406	0.113665	-1.91637
ENSG00000303755.1	lncRNA	ENSG00000303755	2	NA	chr11	HAVANA	gene	47767699	47768388	+	-2.841	-3.53888	-3.55027	0.00535849	0.115858	-1.91652
ENSG00000257727.6	protein_coding	CNPY2	2	OTTHUMG00000170330.5	chr12	HAVANA	gene	56309842	56316119	-	-1.11606	2.59604	-3.75348	0.00383677	0.105958	-1.91802
ENSG00000233401.1	processed_pseudogene	PRKAR1AP1	1	OTTHUMG00000010291.2	chr1	HAVANA	gene	92125301	92126462	+	2.28929	-0.396217	3.5553	0.0053141	0.115391	-1.91934
ENSG00000254122.3	protein_coding	PCDHGB7	2	OTTHUMG00000164054.2	chr5	HAVANA	gene	141417645	141512975	+	1.7612	3.45939	3.69382	0.00423011	0.108663	-1.92064
ENSG00000302647.1	lncRNA	ENSG00000302647	2	NA	chr19	HAVANA	gene	14374934	14375191	-	-3.18529	-3.91306	-3.54701	0.00538751	0.116015	-1.92151
ENSG00000171150.9	protein_coding	SOCS5	2	OTTHUMG00000128852.4	chr2	HAVANA	gene	46698952	46780245	+	1.11869	5.47671	3.8291	0.00339241	0.102136	-1.92351
ENSG00000287763.2	lncRNA	ENSG00000287763	2	OTTHUMG00000195742.1	chr2	HAVANA	gene	87311436	87348822	-	-2.81754	-2.44848	-3.57055	0.00518172	0.115062	-1.92362
ENSG00000101003.12	protein_coding	GINS1	2	OTTHUMG00000032124.2	chr20	HAVANA	gene	25391008	25452700	+	-2.5663	1.11878	-3.70342	0.00416408	0.108336	-1.92404
ENSG00000123384.14	protein_coding	LRP1	1	OTTHUMG00000044412.8	chr12	HAVANA	gene	57128483	57213361	+	2.5896	10.1639	3.94335	0.00282044	0.0952692	-1.92657
ENSG00000272942.1	lncRNA	ENSG00000272942	2	OTTHUMG00000186164.1	chr22	HAVANA	gene	25412803	25448847	-	-2.75491	-3.80388	-3.54237	0.00542902	0.116553	-1.92846
ENSG00000293453.2	lncRNA	ENSG00000293453	2	NA	chr1	HAVANA	gene	21943780	21957177	-	-3.24742	-3.06546	-3.55407	0.00532492	0.115543	-1.9286
ENSG00000285077.4	protein_coding	ARHGAP11B	2	OTTHUMG00000192491.3	chr15	HAVANA	gene	30624494	30649529	+	-1.77514	0.84472	-3.66197	0.0044571	0.110105	-1.9289
ENSG00000122870.12	protein_coding	BICC1	2	OTTHUMG00000018271.4	chr10	HAVANA	gene	58512872	58831435	+	5.06163	4.92889	3.64138	0.0046105	0.111157	-1.92979
ENSG00000198816.7	protein_coding	ZNF358	2	OTTHUMG00000182582.4	chr19	HAVANA	gene	7515292	7521025	+	2.09175	4.44935	3.72361	0.00402869	0.107182	-1.93244
ENSG00000262979.1	lncRNA	ENSG00000262979	2	OTTHUMG00000177579.1	chr17	HAVANA	gene	80315651	80316633	+	-3.63439	-0.276567	-3.64301	0.00459814	0.111035	-1.9334
ENSG00000285796.2	lncRNA	ENSG00000285796	2	OTTHUMG00000192646.1	chr20	HAVANA	gene	45926518	45935086	-	-1.10241	2.73661	-3.74529	0.00388842	0.106417	-1.93599
ENSG00000307028.1	lncRNA	ENSG00000307028	2	NA	chr3	HAVANA	gene	129021271	129026729	-	-1.70432	-1.99801	-3.56249	0.00525128	0.115062	-1.93839
ENSG00000305612.1	lncRNA	ENSG00000305612	2	NA	chrX	HAVANA	gene	11351278	11351708	-	3.05574	-0.457183	3.53404	0.00550448	0.117564	-1.93915
ENSG00000145423.5	protein_coding	SFRP2	2	OTTHUMG00000161559.3	chr4	HAVANA	gene	153780591	153789083	-	6.69968	4.79554	3.59819	0.00495053	0.113672	-1.93987
ENSG00000232392.1	processed_pseudogene	GOT2P7	1	OTTHUMG00000021131.1	chrX	HAVANA	gene	11334233	11335901	-	2.13858	0.795053	3.56179	0.00525729	0.115062	-1.94034
ENSG00000205846.4	protein_coding	CLEC6A	2	OTTHUMG00000168672.2	chr12	HAVANA	gene	8455962	8478330	+	-3.38057	-2.48265	-3.55832	0.0052876	0.115062	-1.94065
ENSG00000305358.1	lncRNA	ENSG00000305358	2	NA	chr6	HAVANA	gene	89034881	89035590	-	-2.75233	-4.16771	-3.53059	0.00553605	0.117779	-1.94223
ENSG00000155366.17	protein_coding	RHOC	1	OTTHUMG00000011905.6	chr1	HAVANA	gene	112701127	112707434	-	1.4073	5.56957	3.81902	0.00344839	0.102423	-1.94269
ENSG00000133835.18	protein_coding	HSD17B4	1	OTTHUMG00000128899.6	chr5	HAVANA	gene	119452465	119637199	+	0.904234	6.95204	3.87628	0.00314273	0.0989997	-1.94287
ENSG00000162753.13	protein_coding	SLC9C2	2	OTTHUMG00000034800.4	chr1	HAVANA	gene	173500460	173603072	-	-3.03073	-1.40494	-3.5693	0.00519248	0.115062	-1.94699
ENSG00000167925.17	protein_coding	GHDC	1	OTTHUMG00000180108.3	chr17	HAVANA	gene	42188799	42194513	-	1.12877	4.16477	3.7471	0.00387697	0.106262	-1.95087
ENSG00000167566.17	protein_coding	NCKAP5L	2	OTTHUMG00000156969.4	chr12	HAVANA	gene	49791146	49828750	-	1.22705	5.67068	3.81805	0.00345383	0.102423	-1.95185
ENSG00000149380.12	protein_coding	P4HA3	1	OTTHUMG00000165254.5	chr11	HAVANA	gene	74235801	74311640	-	2.90405	1.47573	3.56836	0.00520057	0.115062	-1.95296
ENSG00000159403.18	protein_coding	C1R	1	OTTHUMG00000168149.10	chr12	HAVANA	gene	7080214	7092540	-	4.26375	7.7454	3.81637	0.0034633	0.102423	-1.95433
ENSG00000280208.1	transcribed_unprocessed_pseudogene	GGT4P	2	OTTHUMG00000189382.1	chr13	HAVANA	gene	18253526	18270822	-	-3.6492	-2.44477	-3.55944	0.00527777	0.115062	-1.95477
ENSG00000155876.6	protein_coding	RRAGA	2	OTTHUMG00000019621.2	chr9	HAVANA	gene	19049427	19051025	+	1.47696	4.8442	3.75854	0.00380524	0.105567	-1.95519
ENSG00000162510.6	protein_coding	MATN1	2	OTTHUMG00000003705.3	chr1	HAVANA	gene	30711277	30723585	-	-3.13631	-2.72112	-3.54153	0.00543658	0.116633	-1.95822
ENSG00000289126.3	lncRNA	ENSG00000289126	2	NA	chr10	HAVANA	gene	119080894	119081841	+	-2.42259	-2.43417	-3.5327	0.00551669	0.117604	-1.9588
ENSG00000169679.15	protein_coding	BUB1	2	OTTHUMG00000153638.6	chr2	HAVANA	gene	110637528	110678063	-	-3.45687	1.77821	-3.72915	0.00399234	0.107138	-1.96019
ENSG00000272906.2	lncRNA	ENSG00000272906	2	OTTHUMG00000186037.1	chr1	HAVANA	gene	179881607	179882703	-	-1.73606	-0.356152	-3.57848	0.00511425	0.114827	-1.96219
ENSG00000308764.1	lncRNA	ENSG00000308764	2	NA	chr17	HAVANA	gene	59892541	59892694	-	-2.27457	-3.69843	-3.51648	0.00566703	0.119171	-1.96316
ENSG00000007933.13	protein_coding	FMO3	2	OTTHUMG00000035505.5	chr1	HAVANA	gene	171090901	171117819	+	4.29078	2.07719	3.54602	0.00539632	0.116015	-1.96319
ENSG00000131080.15	protein_coding	EDA2R	2	OTTHUMG00000021736.3	chrX	HAVANA	gene	66595637	66639298	-	2.30293	3.05888	3.62501	0.00473644	0.112234	-1.9634
ENSG00000295205.1	lncRNA	ENSG00000295205	2	NA	chr1	HAVANA	gene	235654609	235657396	-	-2.81676	-4.15327	-3.51631	0.00566866	0.119171	-1.96345
ENSG00000280388.1	TEC	ENSG00000280388	2	OTTHUMG00000188599.1	chr7	HAVANA	gene	76043977	76045963	-	-1.39413	1.73144	-3.67124	0.00438969	0.10943	-1.96401
ENSG00000262322.1	unprocessed_pseudogene	MTND4P34	2	OTTHUMG00000177347.1	chr16	HAVANA	gene	10721698	10723068	-	-2.43236	-3.51929	-3.51945	0.00563923	0.119047	-1.96431
ENSG00000235590.10	lncRNA	GNAS-AS1	2	OTTHUMG00000060481.5	chr20	HAVANA	gene	58818893	58855296	-	-1.50273	1.11283	-3.6434	0.00459524	0.111035	-1.96975
ENSG00000266897.1	lncRNA	ENSG00000266897	2	OTTHUMG00000180749.1	chr19	HAVANA	gene	13131571	13132410	+	-2.43579	-1.19515	-3.56023	0.00527092	0.115062	-1.97068
ENSG00000240032.1	lncRNA	LNCSRLR	1	OTTHUMG00000159416.1	chr3	HAVANA	gene	146066344	146069185	-	3.05999	0.724762	3.53038	0.00553794	0.117779	-1.97445
ENSG00000299818.1	lncRNA	ENSG00000299818	2	NA	chr5	HAVANA	gene	131417082	131422136	-	-2.31132	0.00582467	-3.59723	0.00495836	0.113672	-1.97565
ENSG00000304744.1	lncRNA	ENSG00000304744	2	NA	chr14	HAVANA	gene	68733876	68734409	-	-2.81676	-4.15327	-3.50762	0.00575099	0.119565	-1.97616
ENSG00000137831.15	protein_coding	UACA	2	OTTHUMG00000133363.5	chr15	HAVANA	gene	70654554	70763558	-	3.32504	7.04649	3.79331	0.0035956	0.104424	-1.97622
ENSG00000261359.3	lncRNA	PYCARD-AS1	2	OTTHUMG00000132405.33	chr16	HAVANA	gene	31201486	31203452	+	-2.68507	-1.38678	-3.54784	0.00538005	0.115994	-1.97639
ENSG00000297003.1	lncRNA	ENSG00000297003	2	NA	chr6	HAVANA	gene	150419224	150421986	+	-2.5763	-3.69738	-3.50982	0.00572996	0.119565	-1.97671
ENSG00000197279.5	protein_coding	ZNF165	2	OTTHUMG00000014505.2	chr6	HAVANA	gene	28080568	28089563	+	-2.38967	0.803995	-3.6518	0.00453222	0.110496	-1.97678
ENSG00000295493.1	lncRNA	ENSG00000295493	2	NA	chr1	HAVANA	gene	2300846	2301069	-	-3.14849	-4.07958	-3.50882	0.00573951	0.119565	-1.97738
ENSG00000238825.1	snRNA	RNVU1-2	3	NA	chr1	ENSEMBL	gene	148388490	148388651	-	-2.98563	-3.03706	-3.51794	0.00565332	0.119171	-1.97834
ENSG00000142173.17	protein_coding	COL6A2	2	OTTHUMG00000090489.8	chr21	HAVANA	gene	46098112	46132848	+	3.8381	9.17877	3.8658	0.00319648	0.0994903	-1.97929
ENSG00000243244.7	protein_coding	STON1	2	OTTHUMG00000129169.7	chr2	HAVANA	gene	48529383	48598513	+	3.10517	4.50174	3.67417	0.00436867	0.10943	-1.98001
ENSG00000289017.1	lncRNA	ENSG00000289017	2	NA	chr15	HAVANA	gene	92908004	92909131	+	-1.7611	2.88722	-3.74209	0.00390879	0.106686	-1.98014
ENSG00000298660.1	lncRNA	ENSG00000298660	2	NA	chr7	HAVANA	gene	157288254	157293620	-	-2.83788	-3.74807	-3.50838	0.00574372	0.119565	-1.98041
ENSG00000105520.11	protein_coding	PLPPR2	1	OTTHUMG00000182023.2	chr19	HAVANA	gene	11355386	11365698	+	1.33023	4.07201	3.71302	0.00409912	0.10826	-1.98269
ENSG00000169515.9	protein_coding	CCDC8	2	OTTHUMG00000162348.4	chr19	HAVANA	gene	46410329	46413564	-	5.45632	2.43416	3.52425	0.00559448	0.118538	-1.98303
ENSG00000266507.1	miRNA	MIR4479	3	NA	chr9	ENSEMBL	gene	136886733	136886803	+	-2.68979	-4.25746	-3.50116	0.0058129	0.119882	-1.98341
ENSG00000256835.1	processed_pseudogene	ENSG00000256835	2	OTTHUMG00000169107.1	chr12	HAVANA	gene	67978107	67978387	-	-2.68979	-4.25746	-3.50116	0.0058129	0.119882	-1.98341
ENSG00000166451.14	protein_coding	CENPN	2	OTTHUMG00000137628.2	chr16	HAVANA	gene	81006552	81033114	+	-1.72789	2.22003	-3.68544	0.00428864	0.109204	-1.98402
ENSG00000215030.5	processed_pseudogene	RPL13P12	2	OTTHUMG00000059294.2	chr17	HAVANA	gene	17383377	17384012	-	1.10738	4.686	3.74964	0.00386088	0.106045	-1.98476
ENSG00000183114.8	protein_coding	FAM43B	2	OTTHUMG00000057491.2	chr1	HAVANA	gene	20552573	20555020	+	2.79314	-1.5753	3.4987	0.00583672	0.120006	-1.98646
ENSG00000103024.8	protein_coding	NME3	2	OTTHUMG00000128635.3	chr16	HAVANA	gene	1770320	1771561	-	1.48429	3.62956	3.68375	0.00430052	0.109232	-1.98695
ENSG00000140451.13	protein_coding	PIF1	2	OTTHUMG00000132974.4	chr15	HAVANA	gene	64815632	64825668	-	-2.36782	1.43131	-3.67369	0.00437212	0.10943	-1.98753
ENSG00000261845.2	lncRNA	ENSG00000261845	2	OTTHUMG00000177963.1	chr17	HAVANA	gene	82602989	82604178	-	-3.22473	-2.9488	-3.50817	0.00574566	0.119565	-1.98975
ENSG00000261341.7	protein_coding	SMIM47	2	OTTHUMG00000176604.3	chr19	HAVANA	gene	50776141	50793142	-	-2.86223	-3.07888	-3.51035	0.00572496	0.119565	-1.98981
ENSG00000237280.1	lncRNA	ENSG00000237280	2	OTTHUMG00000018660.1	chr10	HAVANA	gene	87113954	87115523	+	-2.00687	0.0530913	-3.58503	0.00505924	0.114594	-1.9933
ENSG00000293161.1	lncRNA	ENSG00000293161	2	NA	chr12	HAVANA	gene	6873389	6884741	+	-1.84188	-2.04708	-3.52174	0.00561778	0.118925	-1.99412
ENSG00000291208.2	lncRNA	ENSG00000291208	2	NA	chr7	HAVANA	gene	45768840	45815263	+	-1.35777	1.14922	-3.62737	0.00471809	0.112161	-1.99509
ENSG00000261804.4	lncRNA	ENSG00000261804	2	OTTHUMG00000173195.2	chr16	HAVANA	gene	53373436	53415927	+	-2.9079	-2.47936	-3.52413	0.00559561	0.118538	-1.99533
ENSG00000279133.1	TEC	ENSG00000279133	2	OTTHUMG00000179252.1	chr17	HAVANA	gene	62003700	62007518	-	-1.16008	3.96863	-3.77396	0.00371075	0.10504	-1.99599
ENSG00000037757.14	protein_coding	MRI1	1	OTTHUMG00000180867.4	chr19	HAVANA	gene	13764522	13774282	+	0.921217	4.73003	3.76185	0.00378472	0.105479	-1.99609
ENSG00000079616.14	protein_coding	KIF22	1	OTTHUMG00000097771.5	chr16	HAVANA	gene	29790727	29805385	+	-1.00616	4.24651	-3.78621	0.00363739	0.10474	-1.99767
ENSG00000303469.1	lncRNA	ENSG00000303469	2	NA	chr17	HAVANA	gene	78345171	78355260	-	-3.63805	-3.14689	-3.50376	0.00578786	0.119882	-2.00132
ENSG00000250568.1	processed_pseudogene	ENSG00000250568	2	OTTHUMG00000160581.1	chr4	HAVANA	gene	39973128	39973442	-	-2.23712	-0.698922	-3.56136	0.00526108	0.115062	-2.00181
ENSG00000006015.18	protein_coding	REX1BD	1	OTTHUMG00000183112.1	chr19	HAVANA	gene	18588685	18592337	+	1.07556	4.10073	3.70435	0.00415774	0.108336	-2.0024
ENSG00000188467.11	protein_coding	SLC24A5	2	OTTHUMG00000131494.5	chr15	HAVANA	gene	48120990	48142672	+	-2.42218	-4.04332	-3.48747	0.0059466	0.120376	-2.00442
ENSG00000287477.2	lncRNA	ENSG00000287477	2	OTTHUMG00000194851.1	chr13	HAVANA	gene	37869747	37874444	+	3.4307	-2.7234	3.48523	0.0059688	0.120376	-2.0071
ENSG00000198483.13	protein_coding	ANKRD35	2	OTTHUMG00000013743.3	chr1	HAVANA	gene	145866560	145885866	-	3.62818	1.04613	3.49787	0.00584482	0.120006	-2.00907
ENSG00000260302.4	lncRNA	LINC01882	2	OTTHUMG00000180894.5	chr18	HAVANA	gene	12739486	12776143	-	-2.40447	-1.5047	-3.52525	0.00558518	0.1185	-2.00916
ENSG00000198768.11	protein_coding	APCDD1L	2	OTTHUMG00000032845.5	chr20	HAVANA	gene	58459101	58515399	-	3.37489	-0.415648	3.48556	0.00596548	0.120376	-2.01033
ENSG00000072041.18	protein_coding	SLC6A15	1	OTTHUMG00000169742.8	chr12	HAVANA	gene	84859491	84913629	-	3.68637	-1.02132	3.48188	0.00600213	0.120376	-2.01061
ENSG00000261026.1	lncRNA	ENSG00000261026	2	OTTHUMG00000173366.1	chr8	HAVANA	gene	22679013	22684009	-	-2.75333	-0.628214	-3.5695	0.00519077	0.115062	-2.01085
ENSG00000300601.1	lncRNA	ENSG00000300601	2	NA	chr10	HAVANA	gene	128061337	128063169	-	-3.11111	-3.2641	-3.49324	0.00588989	0.120006	-2.01311
ENSG00000274925.2	lncRNA	ZKSCAN2-DT	2	OTTHUMG00000186827.1	chr16	HAVANA	gene	25257952	25355763	+	-1.34048	2.34629	-3.67685	0.0043495	0.10943	-2.01408
ENSG00000253632.2	lncRNA	ENSG00000253632	2	OTTHUMG00000163795.1	chr8	HAVANA	gene	29496028	29544576	+	-3.30178	-3.00754	-3.50211	0.0058038	0.119882	-2.01521
ENSG00000140835.10	protein_coding	CHST4	2	OTTHUMG00000137592.4	chr16	HAVANA	gene	71525233	71538748	+	-2.83627	-2.07161	-3.5138	0.00569232	0.119256	-2.01575
ENSG00000290040.1	lncRNA	ENSG00000290040	2	NA	chr12	HAVANA	gene	14366086	14366594	+	-2.62806	-0.0874034	-3.59541	0.00497328	0.113678	-2.01692
ENSG00000214773.1	lncRNA	ENSG00000214773	2	OTTHUMG00000179466.1	chr3	HAVANA	gene	47601715	47604677	-	-1.39439	0.826093	-3.60246	0.00491579	0.113665	-2.01694
ENSG00000286205.1	lncRNA	ENSG00000286205	2	OTTHUMG00000192757.1	chr4	HAVANA	gene	843963	846294	-	-3.22197	-2.43631	-3.5031	0.0057943	0.119882	-2.01721
ENSG00000100526.21	protein_coding	CDKN3	1	OTTHUMG00000140302.4	chr14	HAVANA	gene	54396849	54420218	+	-2.31324	0.310956	-3.58465	0.00506241	0.114594	-2.01729
ENSG00000303397.1	lncRNA	ENSG00000303397	2	NA	chr21	HAVANA	gene	27883613	27893722	-	4.83376	-1.08058	3.47668	0.00605422	0.120383	-2.01815
ENSG00000164161.10	protein_coding	HHIP	2	OTTHUMG00000161428.3	chr4	HAVANA	gene	144646156	144745271	+	4.72432	1.77289	3.50034	0.00582087	0.119882	-2.01976
ENSG00000168209.6	protein_coding	DDIT4	2	OTTHUMG00000183961.3	chr10	HAVANA	gene	72273919	72276036	+	1.75463	7.00749	3.82151	0.00343449	0.102399	-2.02057
ENSG00000200118.1	misc_RNA	Y_RNA	3	NA	chr3	ENSEMBL	gene	170244782	170244881	+	-2.4829	-3.24848	-3.48176	0.0060033	0.120376	-2.02342
ENSG00000262714.1	lncRNA	ENSG00000262714	2	OTTHUMG00000176690.2	chr16	HAVANA	gene	53386944	53389085	+	-3.51961	-2.4086	-3.50219	0.00580298	0.119882	-2.02516
ENSG00000010292.13	protein_coding	NCAPD2	1	OTTHUMG00000168513.3	chr12	HAVANA	gene	6493356	6531955	+	-0.808989	5.46756	-3.81102	0.00349353	0.102851	-2.02573
ENSG00000298935.1	lncRNA	ENSG00000298935	2	NA	chr20	HAVANA	gene	40747254	40757280	-	-3.05343	-3.34628	-3.47869	0.00603402	0.120376	-2.02763
ENSG00000176485.14	protein_coding	PLAAT3	2	OTTHUMG00000167852.3	chr11	HAVANA	gene	63573195	63616883	-	2.73623	4.12704	3.61363	0.00482607	0.112948	-2.02826
ENSG00000268089.3	protein_coding	GABRQ	2	OTTHUMG00000022649.5	chrX	HAVANA	gene	152637895	152657542	+	-2.7284	-4.20182	-3.47082	0.00611355	0.120955	-2.02853
ENSG00000241956.12	lncRNA	LINC03000	2	OTTHUMG00000162877.18	chr5	HAVANA	gene	164296349	165172698	+	3.22304	-2.88945	3.46941	0.00612783	0.120955	-2.02973
ENSG00000090539.16	protein_coding	CHRD	1	OTTHUMG00000141267.2	chr3	HAVANA	gene	184380054	184390736	+	2.88532	3.70378	3.59855	0.00494758	0.113672	-2.02978
ENSG00000229719.8	lncRNA	MIR194-2HG	2	OTTHUMG00000066834.2	chr11	HAVANA	gene	64888458	64893484	-	-3.38186	-2.17164	-3.49664	0.00585672	0.120006	-2.03046
ENSG00000306484.1	lncRNA	ENSG00000306484	2	NA	chrX	HAVANA	gene	12971512	12974985	+	-2.46144	-3.27879	-3.47179	0.00610362	0.120955	-2.03177
ENSG00000189157.14	protein_coding	FAM47E	1	OTTHUMG00000185390.4	chr4	HAVANA	gene	76214040	76283783	+	2.38841	0.0415491	3.47779	0.00604309	0.120376	-2.03432
ENSG00000128274.17	protein_coding	A4GALT	2	OTTHUMG00000150744.7	chr22	HAVANA	gene	42692121	42721298	-	2.36032	3.99594	3.62378	0.00474602	0.112373	-2.03463
ENSG00000293222.2	lncRNA	ACTG1P17	2	NA	chr15	HAVANA	gene	82710450	82750503	-	-1.63187	1.24002	-3.6069	0.00487991	0.113665	-2.03681
ENSG00000253516.1	processed_pseudogene	HMGB1P41	1	OTTHUMG00000164591.1	chr8	HAVANA	gene	80812142	80812581	-	2.28096	0.0839618	3.4838	0.00598303	0.120376	-2.03782
ENSG00000307035.1	lncRNA	ENSG00000307035	2	NA	chr18	HAVANA	gene	63422633	63423946	+	-2.69182	-3.38254	-3.46903	0.00613177	0.120955	-2.03925
ENSG00000259940.2	lncRNA	ENSG00000259940	2	OTTHUMG00000177038.2	chr16	HAVANA	gene	27213308	27214993	-	-2.39614	-2.42928	-3.48699	0.0059514	0.120376	-2.04034
ENSG00000110328.6	protein_coding	GALNT18	2	OTTHUMG00000165707.2	chr11	HAVANA	gene	11270877	11622005	-	2.61347	3.8966	3.61112	0.0048461	0.113082	-2.04137
ENSG00000176495.3	protein_coding	OR5AN1	2	OTTHUMG00000167337.2	chr11	HAVANA	gene	59358895	59371714	+	-3.87853	-1.50193	-3.53539	0.00549217	0.117494	-2.04172
ENSG00000232724.1	unitary_pseudogene	TRIM80P	2	OTTHUMG00000154700.1	chr17	HAVANA	gene	75074306	75079549	+	-2.29733	-3.16124	-3.47268	0.00609464	0.120955	-2.04178
ENSG00000166803.14	protein_coding	PCLAF	1	OTTHUMG00000133017.5	chr15	HAVANA	gene	64364304	64387687	-	-3.4651	-1.65769	-3.51969	0.0056369	0.119047	-2.04208
ENSG00000259515.1	lncRNA	ENSG00000259515	2	OTTHUMG00000171899.1	chr14	HAVANA	gene	102933574	102937177	+	-2.83888	-3.69738	-3.46511	0.00617184	0.121303	-2.04213
ENSG00000146233.8	protein_coding	CYP39A1	2	OTTHUMG00000014785.2	chr6	HAVANA	gene	46549580	46652830	-	3.41124	-0.0994133	3.46361	0.00618722	0.121303	-2.04355
ENSG00000275236.1	lncRNA	ENSG00000275236	2	OTTHUMG00000186984.2	chr16	HAVANA	gene	74289593	74291052	-	-2.58727	-1.8267	-3.49058	0.00591601	0.120208	-2.04572
ENSG00000144476.6	protein_coding	ACKR3	2	OTTHUMG00000133295.5	chr2	HAVANA	gene	236567787	236582354	+	3.97217	4.70363	3.59577	0.00497035	0.113678	-2.04653
ENSG00000306162.1	lncRNA	ENSG00000306162	2	NA	chr17	HAVANA	gene	39634633	39637290	-	-2.80867	-3.94173	-3.45858	0.00623931	0.121655	-2.04726
ENSG00000228857.4	lncRNA	ACTR3-AS1	1	OTTHUMG00000153496.1	chr2	HAVANA	gene	113760277	113891064	-	-1.48804	2.16123	-3.65809	0.00448558	0.110496	-2.04756
ENSG00000177374.13	protein_coding	HIC1	2	OTTHUMG00000177635.11	chr17	HAVANA	gene	2054154	2063241	+	2.43695	4.83141	3.67033	0.00439631	0.10943	-2.04835
ENSG00000108106.14	protein_coding	UBE2S	1	OTTHUMG00000180811.5	chr19	HAVANA	gene	55399745	55407788	-	-1.4492	2.86811	-3.68829	0.00426859	0.108967	-2.05007
ENSG00000187398.12	protein_coding	LUZP2	2	OTTHUMG00000166109.4	chr11	HAVANA	gene	24496970	25082638	+	3.73027	-2.48315	3.45389	0.00628822	0.12209	-2.05123
ENSG00000146670.10	protein_coding	CDCA5	2	OTTHUMG00000150420.3	chr11	HAVANA	gene	65066300	65084164	-	-3.1289	0.642915	-3.61104	0.0048467	0.113082	-2.05187
ENSG00000107186.17	protein_coding	MPDZ	1	OTTHUMG00000021031.6	chr9	HAVANA	gene	13105706	13279692	-	2.3353	6.99848	3.77603	0.00369822	0.10504	-2.05261
ENSG00000230312.2	processed_pseudogene	SLC25A53P1	2	OTTHUMG00000022116.2	chrX	HAVANA	gene	103928099	103929017	+	-2.84545	-3.06398	-3.46791	0.00614319	0.121102	-2.05351
ENSG00000267729.1	lncRNA	ENSG00000267729	2	OTTHUMG00000179845.1	chr17	HAVANA	gene	28727258	28727739	+	-2.5996	-4.20182	-3.45343	0.00629298	0.12209	-2.05391
ENSG00000145321.13	protein_coding	GC	2	OTTHUMG00000129915.5	chr4	HAVANA	gene	71741696	71804041	-	5.43899	-0.80251	3.45168	0.0063114	0.122158	-2.05396
ENSG00000206538.9	protein_coding	VGLL3	2	OTTHUMG00000158984.4	chr3	HAVANA	gene	86876388	86991149	-	3.70881	5.94682	3.68042	0.00432405	0.109305	-2.05412
ENSG00000303385.1	lncRNA	ENSG00000303385	2	NA	chr3	HAVANA	gene	112457833	112459895	-	-2.4093	-1.60083	-3.49503	0.00587237	0.120006	-2.05416
ENSG00000137812.21	protein_coding	KNL1	2	OTTHUMG00000166532.6	chr15	HAVANA	gene	40594020	40664342	+	-3.45469	2.22957	-3.69725	0.00420638	0.108556	-2.05425
ENSG00000196756.16	lncRNA	SNHG17	2	OTTHUMG00000032442.90	chr20	HAVANA	gene	38419638	38435409	-	-1.49805	4.45864	-3.76978	0.00373611	0.10504	-2.05439
ENSG00000091409.17	protein_coding	ITGA6	2	OTTHUMG00000132277.6	chr2	HAVANA	gene	172234216	172506459	+	1.28469	6.70184	3.79049	0.00361216	0.104465	-2.05495
ENSG00000272096.2	misc_RNA	RN7SL715P	3	NA	chr3	ENSEMBL	gene	155437538	155437823	-	-2.50583	-4.22246	-3.45149	0.00631339	0.122158	-2.05622
ENSG00000298883.1	lncRNA	ENSG00000298883	2	NA	chr7	HAVANA	gene	50953585	50994736	+	-2.50583	-4.22246	-3.45149	0.00631339	0.122158	-2.05622
ENSG00000256802.4	lncRNA	LCIIAR	2	OTTHUMG00000172189.1	chr15	HAVANA	gene	29664498	29705804	+	-3.2569	-1.68172	-3.50554	0.00577083	0.119663	-2.05665
ENSG00000212657.2	protein_coding	KRTAP16-1	2	OTTHUMG00000133640.2	chr17	HAVANA	gene	41307700	41309309	-	-2.48945	-4.01542	-3.44982	0.00633098	0.122254	-2.06034
ENSG00000213465.8	protein_coding	ARL2	2	OTTHUMG00000165728.2	chr11	HAVANA	gene	65014160	65022184	+	1.96252	3.52232	3.59466	0.00497946	0.113734	-2.06193
ENSG00000267178.3	processed_pseudogene	PHF5AP1	1	OTTHUMG00000182149.3	chr19	HAVANA	gene	19588091	19588415	-	-3.11799	-1.84706	-3.49308	0.00589147	0.120006	-2.06279
ENSG00000081818.4	protein_coding	PCDHB4	2	OTTHUMG00000129617.5	chr5	HAVANA	gene	141121818	141125623	+	2.48285	1.68592	3.50727	0.00575431	0.119565	-2.06325
ENSG00000143319.18	protein_coding	ISG20L2	2	OTTHUMG00000041301.3	chr1	HAVANA	gene	156720796	156728766	-	-0.835507	4.38158	-3.74673	0.00387927	0.106262	-2.06442
ENSG00000137101.14	protein_coding	CD72	2	OTTHUMG00000019870.2	chr9	HAVANA	gene	35609982	35646810	-	-2.32373	2.6985	-3.69286	0.00423678	0.108663	-2.06443
ENSG00000308527.1	lncRNA	ENSG00000308527	2	NA	chr19	HAVANA	gene	29602343	29606178	-	-2.56646	-4.12812	-3.44492	0.00638276	0.122952	-2.0664
ENSG00000250274.3	lncRNA	ENSG00000250274	2	OTTHUMG00000163119.1	chr5	HAVANA	gene	170308701	170312806	-	-2.76285	-1.83137	-3.49826	0.00584098	0.120006	-2.06651
ENSG00000148737.18	protein_coding	TCF7L2	2	OTTHUMG00000019070.11	chr10	HAVANA	gene	112950247	113167678	+	1.47436	5.64315	3.74995	0.00385896	0.106045	-2.069
ENSG00000285710.1	lncRNA	ENSG00000285710	2	OTTHUMG00000193093.1	chr16	HAVANA	gene	70349085	70372166	-	-2.6049	-2.50023	-3.45992	0.00622539	0.121617	-2.07039
ENSG00000210082.2	Mt_rRNA	MT-RNR2	3	NA	chrM	ENSEMBL	gene	1671	3229	+	-2.61635	12.1084	-3.9253	0.00290361	0.095455	-2.07061
ENSG00000196139.14	protein_coding	AKR1C3	2	OTTHUMG00000017585.7	chr10	HAVANA	gene	5035354	5107686	+	2.74011	4.00171	3.58303	0.005076	0.114633	-2.07132
ENSG00000306468.1	lncRNA	ENSG00000306468	2	NA	chr3	HAVANA	gene	128617832	128622914	+	-2.6144	-3.25815	-3.44732	0.00635732	0.122562	-2.07361
ENSG00000277767.2	lncRNA	ENSG00000277767	2	OTTHUMG00000187282.1	chr13	HAVANA	gene	110915284	110917827	+	-1.96156	-0.775712	-3.48987	0.00592297	0.120208	-2.07464
ENSG00000012504.15	protein_coding	NR1H4	1	OTTHUMG00000170359.9	chr12	HAVANA	gene	100473708	100564414	+	3.64609	-2.52607	3.43726	0.00646483	0.123527	-2.07497
ENSG00000146216.14	protein_coding	TTBK1	1	OTTHUMG00000014725.7	chr6	HAVANA	gene	43243481	43288258	+	-2.85022	-1.90786	-3.48179	0.00600301	0.120376	-2.07527
ENSG00000182057.6	lncRNA	OGFRP1	2	OTTHUMG00000150700.2	chr22	HAVANA	gene	42269703	42279534	+	-1.32204	0.563319	-3.54681	0.00538926	0.116015	-2.07539
ENSG00000285790.2	lncRNA	ENSG00000285790	2	OTTHUMG00000193021.1	chr18	HAVANA	gene	45482860	45504038	-	3.36079	-0.818377	3.44029	0.00643221	0.123305	-2.07615
ENSG00000196159.14	protein_coding	FAT4	2	OTTHUMG00000133100.5	chr4	HAVANA	gene	125314918	125492932	+	2.87355	6.42953	3.7295	0.00399009	0.107138	-2.07643
ENSG00000198824.8	protein_coding	CHAMP1	2	OTTHUMG00000017404.9	chr13	HAVANA	gene	114314482	114337626	+	-0.943127	3.66734	-3.70368	0.0041623	0.108336	-2.07646
ENSG00000229335.3	lncRNA	DANT1	2	OTTHUMG00000033102.1	chrX	HAVANA	gene	115840798	115908066	+	-3.58522	-1.42765	-3.49694	0.00585386	0.120006	-2.07699
ENSG00000103257.10	protein_coding	SLC7A5	2	OTTHUMG00000137658.4	chr16	HAVANA	gene	87830016	87869507	-	-2.07575	4.89419	-3.77298	0.00371669	0.10504	-2.07808
ENSG00000129993.15	protein_coding	CBFA2T3	2	OTTHUMG00000137864.10	chr16	HAVANA	gene	88874858	88977207	-	-1.62267	2.74963	-3.65855	0.00448218	0.110496	-2.07978
ENSG00000101230.6	protein_coding	ISM1	2	OTTHUMG00000031902.3	chr20	HAVANA	gene	13221274	13300651	+	4.49103	2.4003	3.47933	0.00602761	0.120376	-2.08
ENSG00000304444.1	lncRNA	ENSG00000304444	2	NA	chr5	HAVANA	gene	112419315	112419927	-	3.1716	-0.768034	3.43654	0.00647251	0.123527	-2.08033
ENSG00000289938.2	lncRNA	ENSG00000289938	2	NA	chr7	HAVANA	gene	142812556	142853827	+	-3.18099	-2.58777	-3.46479	0.00617514	0.121303	-2.08063
ENSG00000307495.1	lncRNA	ENSG00000307495	2	NA	chr12	HAVANA	gene	56360011	56380976	+	-2.55087	-3.90547	-3.43719	0.00646556	0.123527	-2.08071
ENSG00000290657.2	lncRNA	ENSG00000290657	2	NA	chr17	HAVANA	gene	18432051	18442895	+	-2.80461	-3.74697	-3.44031	0.00643201	0.123305	-2.08087
ENSG00000174607.12	protein_coding	UGT8	2	OTTHUMG00000132915.5	chr4	HAVANA	gene	114598770	114678588	+	-2.33491	1.73059	-3.65577	0.00450273	0.110496	-2.08121
ENSG00000077254.14	protein_coding	USP33	2	OTTHUMG00000009651.5	chr1	HAVANA	gene	77695987	77759852	-	0.827219	6.63987	3.78605	0.00363838	0.10474	-2.08175
ENSG00000286408.1	lncRNA	ENSG00000286408	2	OTTHUMG00000193917.1	chr5	HAVANA	gene	133051065	133051893	-	-1.64166	-0.705659	-3.48896	0.00593194	0.120294	-2.08427
ENSG00000257475.2	lncRNA	ENSG00000257475	2	OTTHUMG00000169714.2	chr12	HAVANA	gene	53012104	53013921	+	-1.55528	0.760274	-3.55047	0.00535675	0.115858	-2.08821
ENSG00000272754.1	lncRNA	ENSG00000272754	2	OTTHUMG00000185846.2	chr2	HAVANA	gene	32321638	32323002	+	-1.64198	-0.314166	-3.50593	0.00576713	0.119663	-2.08834
ENSG00000237928.7	lncRNA	NFIA-AS2	2	OTTHUMG00000008421.3	chr1	HAVANA	gene	60912675	61056885	-	3.25107	-0.335675	3.43248	0.00651651	0.12419	-2.09003
ENSG00000064989.13	protein_coding	CALCRL	2	OTTHUMG00000132636.6	chr2	HAVANA	gene	187341964	187448460	-	4.0959	5.49136	3.60618	0.00488568	0.113665	-2.09163
ENSG00000245067.9	lncRNA	IGFBP7-AS1	2	OTTHUMG00000161143.5	chr4	HAVANA	gene	57109736	57207459	+	3.76547	-0.178479	3.43104	0.00653212	0.124391	-2.09264
ENSG00000196975.16	protein_coding	ANXA4	2	OTTHUMG00000129649.6	chr2	HAVANA	gene	69644425	69827112	+	1.22813	5.62247	3.73267	0.00396942	0.107138	-2.09321
ENSG00000186265.11	protein_coding	BTLA	2	OTTHUMG00000159255.3	chr3	HAVANA	gene	112461067	112499472	-	-3.32332	1.34824	-3.63535	0.0046565	0.111558	-2.09405
ENSG00000303738.1	lncRNA	ENSG00000303738	2	NA	chr8	HAVANA	gene	143217151	143218581	-	-3.81797	-2.20627	-3.47921	0.00602879	0.120376	-2.09511
ENSG00000267080.9	lncRNA	ASB16-AS1	2	OTTHUMG00000181810.3	chr17	HAVANA	gene	44157293	44187180	-	-1.13207	3.66267	-3.70395	0.00416044	0.108336	-2.09551
ENSG00000310430.1	lncRNA	ENSG00000310430	2	NA	chr7	HAVANA	gene	142798735	142799247	+	-2.81759	0.74808	-3.58723	0.00504089	0.114363	-2.09571
ENSG00000260339.3	lncRNA	HEXA-AS1	2	OTTHUMG00000177184.1	chr15	HAVANA	gene	72376051	72379899	+	-2.22177	-1.19909	-3.47937	0.00602721	0.120376	-2.0969
ENSG00000302291.1	lncRNA	ENSG00000302291	2	NA	chr11	HAVANA	gene	72112854	72113851	+	-2.49083	-4.01542	-3.4242	0.00660713	0.125054	-2.09795
ENSG00000294237.1	lncRNA	ENSG00000294237	2	NA	chr20	HAVANA	gene	23356402	23358931	+	-2.50583	-4.22246	-3.42286	0.00662191	0.12508	-2.09801
ENSG00000183397.6	protein_coding	TEKTIP1	2	OTTHUMG00000180764.1	chr19	HAVANA	gene	3539171	3544030	+	-1.45429	0.123842	-3.51252	0.00570434	0.119426	-2.1007
ENSG00000234851.4	processed_pseudogene	RPL23AP42	1	OTTHUMG00000159072.1	chr3	HAVANA	gene	161429127	161429597	-	-1.35554	1.39603	-3.56045	0.00526902	0.115062	-2.10169
ENSG00000106819.13	protein_coding	ASPN	1	OTTHUMG00000020227.2	chr9	HAVANA	gene	92456205	92482506	-	7.18852	4.12953	3.4568	0.00625782	0.121936	-2.10192
ENSG00000249667.3	lncRNA	LINC01259	2	OTTHUMG00000160486.1	chr4	HAVANA	gene	38509729	38561784	+	-2.42549	-4.04332	-3.42044	0.00664866	0.125101	-2.10242
ENSG00000215305.10	protein_coding	VPS16	2	OTTHUMG00000031714.6	chr20	HAVANA	gene	2840703	2866732	+	0.904281	4.941	3.70412	0.00415928	0.108336	-2.10278
ENSG00000167468.20	protein_coding	GPX4	1	OTTHUMG00000181874.11	chr19	HAVANA	gene	1103982	1106791	+	1.07799	7.18394	3.78089	0.00366905	0.104952	-2.10289
ENSG00000205500.9	lncRNA	MAPRE3-AS1	1	OTTHUMG00000151998.2	chr2	HAVANA	gene	26984776	27014645	-	-2.03839	-3.08404	-3.42315	0.00661869	0.12508	-2.10504
ENSG00000272620.2	lncRNA	AFAP1-AS1	2	OTTHUMG00000186238.2	chr4	HAVANA	gene	7754077	7778928	+	-4.70157	0.579396	-3.61124	0.00484516	0.113082	-2.1052
ENSG00000286181.1	lncRNA	FLICR	2	OTTHUMG00000193478.2	chrX	HAVANA	gene	49262866	49270521	-	-3.39651	-2.09575	-3.46917	0.00613032	0.120955	-2.10654
ENSG00000287550.2	lncRNA	ENSG00000287550	2	OTTHUMG00000195536.1	chr6	HAVANA	gene	164778052	164856375	-	-3.31841	-2.31387	-3.46194	0.0062045	0.121365	-2.10665
ENSG00000130518.18	protein_coding	IQCN	2	OTTHUMG00000183354.11	chr19	HAVANA	gene	18257098	18274500	-	-1.73475	3.10332	-3.68314	0.00430485	0.10925	-2.10755
ENSG00000163631.19	protein_coding	ALB	1	OTTHUMG00000129919.6	chr4	HAVANA	gene	73397114	73421482	+	7.09483	2.22226	3.42052	0.00664774	0.125101	-2.1088
ENSG00000254750.1	transcribed_unprocessed_pseudogene	CASP1P2	2	OTTHUMG00000166162.1	chr11	HAVANA	gene	105063345	105071541	-	-2.4382	-3.51929	-3.42204	0.00663091	0.1251	-2.1091
ENSG00000286614.1	transcribed_unprocessed_pseudogene	ENSG00000286614	2	OTTHUMG00000193780.1	chr14	HAVANA	gene	19072333	19075341	+	3.23477	-1.58603	3.41375	0.0067233	0.125997	-2.1094
ENSG00000260037.5	lncRNA	ENSG00000260037	2	OTTHUMG00000172843.1	chr15	HAVANA	gene	71818396	71823384	+	-2.74587	-3.40364	-3.42527	0.00659528	0.124976	-2.11114
ENSG00000174915.12	protein_coding	PTDSS2	2	OTTHUMG00000119087.6	chr11	HAVANA	gene	448268	491399	+	1.24984	4.46036	3.6549	0.00450917	0.110496	-2.1117
ENSG00000303374.1	lncRNA	ENSG00000303374	2	NA	chr8	HAVANA	gene	133233169	133234790	-	-2.33443	-2.96315	-3.4273	0.00657304	0.124797	-2.11174
ENSG00000240393.1	processed_pseudogene	DRG1P2	1	OTTHUMG00000159343.1	chr3	HAVANA	gene	117674342	117675144	-	5.77946	-1.34405	3.4113	0.00675086	0.126046	-2.11224
ENSG00000171956.7	protein_coding	FOXB1	1	OTTHUMG00000172011.3	chr15	HAVANA	gene	60004234	60061730	+	-2.72142	-3.1904	-3.42829	0.00656213	0.124746	-2.11327
ENSG00000307065.1	lncRNA	ENSG00000307065	2	NA	chr21	HAVANA	gene	45532741	45532848	-	-2.67469	-3.44818	-3.41868	0.00666822	0.125311	-2.11519
ENSG00000255647.4	lncRNA	ENSG00000255647	2	OTTHUMG00000186592.2	chr5	HAVANA	gene	90409371	90454782	+	-2.77778	-2.3912	-3.43644	0.0064736	0.123527	-2.11874
ENSG00000200651.1	misc_RNA	Y_RNA	3	NA	chr17	ENSEMBL	gene	77442109	77442213	+	-1.7409	-0.361949	-3.49044	0.0059174	0.120208	-2.11982
ENSG00000073712.15	protein_coding	FERMT2	1	OTTHUMG00000140309.5	chr14	HAVANA	gene	52857268	52952435	-	2.71823	6.60814	3.70874	0.00412793	0.108336	-2.12037
ENSG00000237222.5	lncRNA	LINC01968	1	OTTHUMG00000156019.9	chr3	HAVANA	gene	194702667	194826937	+	-3.1146	-1.81241	-3.45204	0.00630761	0.122158	-2.12095
ENSG00000260803.2	lncRNA	ENSG00000260803	2	OTTHUMG00000172805.1	chr16	HAVANA	gene	16125	35207	-	-2.43167	-1.09222	-3.48035	0.00601739	0.120376	-2.12333
ENSG00000166426.8	protein_coding	CRABP1	1	OTTHUMG00000143862.5	chr15	HAVANA	gene	78340353	78348225	+	-2.93087	-0.598091	-3.51488	0.00568207	0.119206	-2.1239
ENSG00000273213.4	protein_coding	H3-7	2	OTTHUMG00000041033.6	chr1	HAVANA	gene	143894544	143905977	-	-1.57268	0.243062	-3.51788	0.00565394	0.119171	-2.1245
ENSG00000293044.2	lncRNA	ENSG00000293044	2	NA	chr1	HAVANA	gene	75641178	75724613	-	-2.91937	-3.26309	-3.4141	0.00671941	0.125997	-2.12538
ENSG00000243137.8	protein_coding	PSG4	1	OTTHUMG00000151544.7	chr19	HAVANA	gene	43192702	43207299	-	3.1921	-2.38298	3.40135	0.00686387	0.126875	-2.12632
ENSG00000287619.2	lncRNA	ENSG00000287619	2	OTTHUMG00000194899.1	chrX	HAVANA	gene	103534987	103586478	-	2.07963	1.15138	3.46362	0.00618722	0.121303	-2.12643
ENSG00000173113.8	protein_coding	TRMT112	2	OTTHUMG00000167848.4	chr11	HAVANA	gene	64316460	64318074	-	1.13896	4.85369	3.67189	0.00438506	0.10943	-2.12652
ENSG00000110090.13	protein_coding	CPT1A	1	OTTHUMG00000167892.6	chr11	HAVANA	gene	68754620	68844410	-	1.83762	6.38465	3.72928	0.00399153	0.107138	-2.12706
ENSG00000068781.21	protein_coding	STON1-GTF2A1L	1	OTTHUMG00000152037.6	chr2	HAVANA	gene	48529925	48776517	+	3.43516	-1.33942	3.4011	0.0068668	0.126875	-2.12801
ENSG00000174516.15	protein_coding	PELI3	1	OTTHUMG00000167109.3	chr11	HAVANA	gene	66466327	66477337	+	1.84233	4.03332	3.59741	0.00495694	0.113672	-2.12942
ENSG00000261008.10	lncRNA	LINC01572	2	OTTHUMG00000173457.17	chr16	HAVANA	gene	72236281	72665083	-	-1.6013	1.78224	-3.59809	0.00495134	0.113672	-2.13008
ENSG00000183763.9	protein_coding	TRAIP	2	OTTHUMG00000158269.4	chr3	HAVANA	gene	49828601	49856574	-	-1.61647	1.21258	-3.55107	0.00535139	0.115858	-2.13073
ENSG00000085999.13	protein_coding	RAD54L	1	OTTHUMG00000007772.10	chr1	HAVANA	gene	46246461	46278480	+	-3.40874	0.359159	-3.54618	0.00539493	0.116015	-2.13074
ENSG00000223466.3	lncRNA	LINC01825	1	OTTHUMG00000154381.5	chr2	HAVANA	gene	195532834	195540287	+	-2.62538	-3.21079	-3.41143	0.00674936	0.126046	-2.13116
ENSG00000121989.15	protein_coding	ACVR2A	2	OTTHUMG00000150603.3	chr2	HAVANA	gene	147844517	147930826	+	1.85145	4.16452	3.59717	0.00495887	0.113672	-2.13133
ENSG00000204616.11	protein_coding	TRIM31	2	OTTHUMG00000031064.3	chr6	HAVANA	gene	30102897	30113090	-	-2.7611	-3.19889	-3.41584	0.00669986	0.125712	-2.13205
ENSG00000111641.13	protein_coding	NOP2	1	OTTHUMG00000169163.2	chr12	HAVANA	gene	6556863	6568691	-	-1.75942	0.148871	-3.50759	0.00575125	0.119565	-2.13237
ENSG00000101940.18	protein_coding	WDR13	2	OTTHUMG00000024119.12	chrX	HAVANA	gene	48590042	48608869	+	1.10032	5.58113	3.70374	0.00416188	0.108336	-2.133
ENSG00000251495.1	processed_pseudogene	PPIAP11	2	OTTHUMG00000162554.1	chr5	HAVANA	gene	82009602	82010094	-	-2.75985	-3.17019	-3.40763	0.00679234	0.126275	-2.1336
ENSG00000249209.2	protein_coding	ENSG00000249209	2	OTTHUMG00000162259.3	chr21	HAVANA	gene	33584687	33931607	-	-2.60221	-3.62473	-3.40416	0.00683174	0.126632	-2.13545
ENSG00000224796.1	processed_pseudogene	RPL32P1	1	OTTHUMG00000031191.2	chr6	HAVANA	gene	33079451	33079860	+	-2.79395	0.137229	-3.53011	0.0055404	0.117779	-2.13553
ENSG00000204262.14	protein_coding	COL5A2	2	OTTHUMG00000149842.5	chr2	HAVANA	gene	189031898	189225312	-	3.89475	7.46127	3.71261	0.00410189	0.10826	-2.13564
ENSG00000243902.7	lncRNA	ELFN2	2	OTTHUMG00000150561.1	chr22	HAVANA	gene	37339565	37427445	-	-3.17081	-3.56783	-3.40957	0.00677037	0.126178	-2.13608
ENSG00000184838.15	protein_coding	PRR16	2	OTTHUMG00000128903.5	chr5	HAVANA	gene	120464300	120687332	+	2.61961	1.79781	3.46319	0.00619164	0.121303	-2.13693
ENSG00000210144.1	Mt_tRNA	MT-TY	3	NA	chrM	ENSEMBL	gene	5826	5891	-	-3.3267	-2.59113	-3.42115	0.00664077	0.125101	-2.13918
ENSG00000114204.16	protein_coding	SERPINI2	1	OTTHUMG00000158231.2	chr3	HAVANA	gene	167441914	167478972	-	3.54239	-0.758014	3.39581	0.00692771	0.127165	-2.14117
ENSG00000280005.1	lncRNA	ENSG00000280005	2	OTTHUMG00000189145.1	chr4	HAVANA	gene	154261735	154262193	+	2.76583	-2.27163	3.39035	0.0069912	0.127383	-2.14188
ENSG00000154734.16	protein_coding	ADAMTS1	2	OTTHUMG00000078688.5	chr21	HAVANA	gene	26835755	26845409	-	6.81871	6.95029	3.53333	0.00551093	0.117564	-2.14213
ENSG00000238370.1	snRNA	RNU7-103P	3	NA	chr12	ENSEMBL	gene	589530	589589	-	-2.56571	-3.89593	-3.39298	0.00696058	0.127165	-2.1425
ENSG00000160957.15	protein_coding	RECQL4	2	OTTHUMG00000165178.7	chr8	HAVANA	gene	144511288	144517845	-	-2.29898	2.39465	-3.63904	0.00462829	0.111162	-2.14462
ENSG00000310203.1	lncRNA	ENSG00000310203	2	NA	chr7	HAVANA	gene	139360581	139361171	+	-1.2644	2.07565	-3.57303	0.00516057	0.115062	-2.14557
ENSG00000240625.3	misc_RNA	RN7SL403P	3	NA	chr6	ENSEMBL	gene	43036196	43036500	-	-2.55994	-3.81113	-3.3929	0.00696149	0.127165	-2.14705
ENSG00000283514.1	miRNA	MIR3975	3	NA	chr18	ENSEMBL	gene	35591737	35591806	+	-1.60172	-1.46671	-3.42634	0.00658359	0.124902	-2.14743
ENSG00000186198.4	protein_coding	SLC51B	2	OTTHUMG00000133116.2	chr15	HAVANA	gene	65045387	65053397	+	-2.96011	-3.75148	-3.39686	0.00691552	0.127165	-2.14789
ENSG00000110811.20	protein_coding	P3H3	2	OTTHUMG00000168516.6	chr12	HAVANA	gene	6828407	6839847	+	4.23163	3.36434	3.47796	0.00604139	0.120376	-2.14799
ENSG00000171222.11	protein_coding	SCAND1	2	OTTHUMG00000032370.2	chr20	HAVANA	gene	35953617	35959472	-	1.14659	3.41145	3.57178	0.00517123	0.115062	-2.14872
ENSG00000138246.17	protein_coding	DNAJC13	2	OTTHUMG00000159674.8	chr3	HAVANA	gene	132417502	132539032	+	0.857295	7.14646	3.75864	0.00380457	0.105567	-2.14951
ENSG00000146955.11	protein_coding	RAB19	2	OTTHUMG00000157410.3	chr7	HAVANA	gene	140404058	140427974	+	-3.49737	-1.64163	-3.45071	0.00632154	0.122238	-2.14962
ENSG00000289204.1	lncRNA	ENSG00000289204	2	NA	chr13	HAVANA	gene	94232987	94235379	+	3.16692	-0.964387	3.38972	0.00699856	0.127383	-2.1502
ENSG00000131116.12	protein_coding	ZNF428	2	OTTHUMG00000182734.4	chr19	HAVANA	gene	43607224	43619629	-	1.36165	3.23551	3.5558	0.00530965	0.115377	-2.15114
ENSG00000206645.1	misc_RNA	Y_RNA	3	NA	chr3	ENSEMBL	gene	37093133	37093234	-	2.39959	-0.398058	3.39805	0.00690178	0.127165	-2.15165
ENSG00000163071.11	protein_coding	SPATA18	1	OTTHUMG00000128698.3	chr4	HAVANA	gene	52051304	52097299	+	2.10013	2.44809	3.49549	0.00586797	0.120006	-2.15229
ENSG00000300577.1	lncRNA	ENSG00000300577	2	NA	chr9	HAVANA	gene	125199071	125201008	-	-2.45163	-3.53993	-3.38888	0.00700841	0.127389	-2.15244
ENSG00000291171.2	lncRNA	ENSG00000291171	2	NA	chr12	HAVANA	gene	132084254	132131639	+	-1.08014	4.36301	-3.7006	0.00418331	0.108442	-2.15435
ENSG00000264462.1	miRNA	MIR3648-2	3	NA	chr21	ENSEMBL	gene	8986999	8987178	+	-2.493	-4.01542	-3.38513	0.00705242	0.127523	-2.15543
ENSG00000117399.14	protein_coding	CDC20	2	OTTHUMG00000007420.3	chr1	HAVANA	gene	43358981	43363203	+	-3.40732	0.02704	-3.5289	0.00555158	0.117934	-2.15564
ENSG00000163710.9	protein_coding	PCOLCE2	1	OTTHUMG00000159312.4	chr3	HAVANA	gene	142815922	142889206	-	3.64371	3.80759	3.51396	0.00569076	0.119256	-2.15702
ENSG00000164056.11	protein_coding	SPRY1	2	OTTHUMG00000133071.4	chr4	HAVANA	gene	123396795	123403760	+	3.0322	6.23777	3.6544	0.00451287	0.110496	-2.1605
ENSG00000144668.12	protein_coding	ITGA9	2	OTTHUMG00000130815.5	chr3	HAVANA	gene	37452115	37823507	+	2.70363	5.56467	3.63773	0.00463831	0.111298	-2.16182
ENSG00000120334.16	protein_coding	CENPL	2	OTTHUMG00000034802.1	chr1	HAVANA	gene	173799550	173824883	-	-1.30706	2.46308	-3.58676	0.00504478	0.114366	-2.16576
ENSG00000049768.18	protein_coding	FOXP3	2	OTTHUMG00000024135.9	chrX	HAVANA	gene	49250438	49264800	-	-3.9008	0.0816795	-3.53374	0.00550717	0.117564	-2.1664
ENSG00000284669.2	lncRNA	ENSG00000284669	2	OTTHUMG00000191917.1	chr3	HAVANA	gene	39148281	39173141	+	-2.46395	-3.18748	-3.391	0.0069836	0.127383	-2.16671
ENSG00000256235.3	protein_coding	SMIM3	2	OTTHUMG00000163646.4	chr5	HAVANA	gene	150778757	150796734	+	2.4959	4.40853	3.57321	0.00515901	0.115062	-2.16684
ENSG00000305859.1	lncRNA	ENSG00000305859	2	NA	chr2	HAVANA	gene	70124036	70125330	+	-2.92264	-2.47313	-3.39744	0.00690888	0.127165	-2.16864
ENSG00000260289.2	lncRNA	ENSG00000260289	2	OTTHUMG00000176683.4	chr16	HAVANA	gene	7878799	8112756	-	-2.61701	-3.62924	-3.38127	0.00709812	0.12812	-2.16928
ENSG00000224324.1	processed_pseudogene	THAP5P1	1	OTTHUMG00000153022.1	chr7	HAVANA	gene	158623188	158623449	-	-1.52702	-1.9694	-3.39884	0.00689269	0.127132	-2.17046
ENSG00000094631.22	protein_coding	HDAC6	1	OTTHUMG00000034496.8	chrX	HAVANA	gene	48801377	48824982	+	0.7476	6.12761	3.71666	0.00407478	0.107732	-2.1705
ENSG00000273796.2	lncRNA	BNAT1	2	OTTHUMG00000186524.1	chr21	HAVANA	gene	45403809	45404943	-	3.28691	-1.36241	3.37272	0.00720031	0.129185	-2.17064
ENSG00000089847.13	protein_coding	ANKRD24	2	OTTHUMG00000181865.3	chr19	HAVANA	gene	4182689	4224814	+	-1.19182	0.79045	-3.4942	0.00588052	0.120006	-2.17505
ENSG00000260101.3	lncRNA	AFTPH-DT	2	OTTHUMG00000175896.1	chr2	HAVANA	gene	64522187	64524789	-	-2.65787	-1.40654	-3.4276	0.00656971	0.124797	-2.17612
ENSG00000163512.14	protein_coding	AZI2	1	OTTHUMG00000130573.10	chr3	HAVANA	gene	28315003	28349050	-	1.03599	5.76595	3.6934	0.00423302	0.108663	-2.17679
ENSG00000235445.1	lncRNA	ENSG00000235445	2	OTTHUMG00000150069.1	chr22	HAVANA	gene	17983205	17983619	-	-1.45195	0.601437	-3.48047	0.0060162	0.120376	-2.178
ENSG00000225746.15	lncRNA	MEG8	1	OTTHUMG00000029060.25	chr14	HAVANA	gene	100883057	101038859	+	3.74324	3.70881	3.47052	0.00611653	0.120955	-2.1787
ENSG00000090581.11	protein_coding	GNPTG	2	OTTHUMG00000047835.7	chr16	HAVANA	gene	1351931	1365737	+	0.826579	5.17552	3.67033	0.0043963	0.10943	-2.17887
ENSG00000157087.20	protein_coding	ATP2B2	2	OTTHUMG00000128679.20	chr3	HAVANA	gene	10324023	10708007	-	5.16395	-0.69117	3.36491	0.00729495	0.129464	-2.17888
ENSG00000153707.19	protein_coding	PTPRD	2	OTTHUMG00000021005.6	chr9	HAVANA	gene	8314246	10613002	-	6.45332	3.31573	3.39492	0.00693805	0.127165	-2.17915
ENSG00000170962.13	protein_coding	PDGFD	2	OTTHUMG00000165953.4	chr11	HAVANA	gene	103907189	104164379	-	3.4862	4.81812	3.56695	0.00521263	0.115062	-2.17964
ENSG00000270872.2	transcribed_unprocessed_pseudogene	SRGAP2D	2	OTTHUMG00000188642.1	chr1	HAVANA	gene	143975087	144068350	+	1.8328	-0.213685	3.39016	0.0069934	0.127383	-2.18062
ENSG00000266378.1	lncRNA	ENSG00000266378	2	OTTHUMG00000179687.1	chr17	HAVANA	gene	14327335	14329474	+	-3.88014	-1.17492	-3.44969	0.00633228	0.122254	-2.18159
ENSG00000116991.12	protein_coding	SIPA1L2	2	OTTHUMG00000037820.1	chr1	HAVANA	gene	232397965	232630571	-	1.33531	6.13115	3.69402	0.00422872	0.108663	-2.18379
ENSG00000305055.1	lncRNA	ENSG00000305055	2	NA	chr16	HAVANA	gene	66238461	66366549	-	2.69258	-1.34185	3.36459	0.00729892	0.129464	-2.18511
ENSG00000263874.3	protein_coding	LASP1NB	2	OTTHUMG00000178440.3	chr17	HAVANA	gene	38925614	38929381	+	-1.45694	0.633981	-3.49282	0.00589404	0.120006	-2.18595
ENSG00000173702.7	protein_coding	MUC13	2	OTTHUMG00000159484.5	chr3	HAVANA	gene	124905442	124953819	-	-3.83808	-1.30781	-3.45495	0.00627709	0.12209	-2.18624
ENSG00000178295.15	protein_coding	GEN1	2	OTTHUMG00000121173.6	chr2	HAVANA	gene	17753858	17788946	+	-1.74542	3.94578	-3.67145	0.00438818	0.10943	-2.18654
ENSG00000126467.11	protein_coding	TSKS	2	OTTHUMG00000183249.3	chr19	HAVANA	gene	49739753	49763306	-	2.98167	0.872171	3.39607	0.00692464	0.127165	-2.18819
ENSG00000299876.1	lncRNA	ENSG00000299876	2	NA	chr4	HAVANA	gene	113813280	113822517	+	-2.51204	-4.24141	-3.36078	0.0073456	0.129464	-2.18825
ENSG00000234129.11	lncRNA	HCCS-DT	2	OTTHUMG00000021129.5	chrX	HAVANA	gene	10847543	11111284	-	-1.75734	0.762582	-3.49546	0.0058682	0.120006	-2.18908
ENSG00000280239.1	TEC	ENSG00000280239	2	OTTHUMG00000182005.1	chr19	HAVANA	gene	4448810	4450836	+	-1.36386	0.27282	-3.45336	0.00629377	0.12209	-2.18916
ENSG00000268650.4	lncRNA	ENSG00000268650	2	OTTHUMG00000183374.6	chr19	HAVANA	gene	18204356	18220480	+	-2.09827	-1.77465	-3.3915	0.00697773	0.127383	-2.18943
ENSG00000102362.16	protein_coding	SYTL4	2	OTTHUMG00000022004.1	chrX	HAVANA	gene	100671783	100732123	-	3.16332	4.13267	3.51507	0.00568029	0.119206	-2.18949
ENSG00000177697.19	protein_coding	CD151	1	OTTHUMG00000133311.10	chr11	HAVANA	gene	832887	839831	+	1.88581	7.04268	3.71098	0.00411285	0.108336	-2.19016
ENSG00000162086.16	protein_coding	ZNF75A	1	OTTHUMG00000129356.4	chr16	HAVANA	gene	3305406	3318852	+	-0.909092	4.29613	-3.66473	0.00443687	0.110105	-2.19181
ENSG00000257949.7	protein_coding	TEN1	1	OTTHUMG00000132686.6	chr17	HAVANA	gene	75979240	76000586	+	-2.56496	-3.25515	-3.37284	0.00719885	0.129185	-2.19294
ENSG00000273972.1	lncRNA	ENSG00000273972	2	OTTHUMG00000186849.1	chr15	HAVANA	gene	45702640	45703183	+	-2.95731	-3.64538	-3.36284	0.0073203	0.129464	-2.19386
ENSG00000258082.2	lncRNA	LINC03108	2	OTTHUMG00000170191.1	chr1	HAVANA	gene	234978814	234980804	-	-3.67981	-0.971736	-3.43932	0.00644263	0.123401	-2.19407
ENSG00000123096.12	protein_coding	SSPN	2	OTTHUMG00000169167.4	chr12	HAVANA	gene	26121991	26299290	+	2.68768	5.11984	3.57207	0.00516875	0.115062	-2.1941
ENSG00000128254.17	lncRNA	YWHAH-AS1	2	OTTHUMG00000195986.1	chr22	HAVANA	gene	31907140	31945518	-	-1.86713	-1.86728	-3.39465	0.00694113	0.127165	-2.19524
ENSG00000227403.4	lncRNA	LINC01806	1	OTTHUMG00000151885.3	chr2	HAVANA	gene	161244544	161262898	+	-3.29708	-0.383148	-3.4809	0.00601193	0.120376	-2.19652
ENSG00000171772.17	protein_coding	SYCE1	2	OTTHUMG00000019321.4	chr10	HAVANA	gene	133553901	133569835	-	3.14764	-2.44887	3.35182	0.00745656	0.130084	-2.19693
ENSG00000305037.1	lncRNA	ENSG00000305037	2	NA	chr2	HAVANA	gene	239380291	239381032	-	-1.39442	-0.0936864	-3.44017	0.00643355	0.123305	-2.19814
ENSG00000118523.6	protein_coding	CCN2	2	OTTHUMG00000015573.3	chr6	HAVANA	gene	131948176	131951372	-	4.62039	5.45843	3.52516	0.00558602	0.1185	-2.19864
ENSG00000237859.2	unprocessed_pseudogene	EEF1A1P31	1	OTTHUMG00000013503.3	chrX	HAVANA	gene	154908885	154919103	-	3.45825	-2.45976	3.35003	0.007479	0.130274	-2.19949
ENSG00000282936.3	protein_coding	ENSG00000282936	2	OTTHUMG00000191541.2	chr17	HAVANA	gene	6578147	6640711	-	-1.10385	1.29332	-3.50077	0.00581671	0.119882	-2.20081
ENSG00000272405.1	lncRNA	ENSG00000272405	2	OTTHUMG00000185554.1	chr1	HAVANA	gene	156641666	156644887	-	-3.59442	0.97647	-3.56546	0.00522549	0.115062	-2.20085
ENSG00000262413.1	lncRNA	ENSG00000262413	2	OTTHUMG00000177881.1	chr17	HAVANA	gene	81867721	81868552	+	-2.68394	-1.14428	-3.41185	0.00674464	0.126046	-2.20182
ENSG00000162191.14	protein_coding	UBXN1	1	OTTHUMG00000167580.2	chr11	HAVANA	gene	62676498	62679117	-	1.31612	5.61519	3.65522	0.00450676	0.110496	-2.20379
ENSG00000196092.14	protein_coding	PAX5	2	OTTHUMG00000019907.9	chr9	HAVANA	gene	36833269	37034268	-	-4.82604	2.29781	-3.62899	0.00470553	0.112113	-2.2049
ENSG00000154611.15	protein_coding	PSMA8	2	OTTHUMG00000179426.1	chr18	HAVANA	gene	26133852	26193355	+	-2.82234	-3.69953	-3.35758	0.00738499	0.129702	-2.20536
ENSG00000278985.1	TEC	ENSG00000278985	2	OTTHUMG00000176490.1	chr16	HAVANA	gene	80982319	80984094	-	-1.53574	0.48333	-3.45871	0.00623789	0.121655	-2.20695
ENSG00000140285.12	protein_coding	FGF7	1	OTTHUMG00000131517.5	chr15	HAVANA	gene	49423237	49488775	+	5.08055	4.96847	3.47145	0.00610706	0.120955	-2.20791
ENSG00000200087.1	snoRNA	SNORA73B	3	NA	chr1	ENSEMBL	gene	28508559	28508762	+	-2.61665	5.78741	-3.73879	0.00392994	0.107061	-2.20828
ENSG00000227145.3	lncRNA	IL21-AS1	2	OTTHUMG00000150127.4	chr4	HAVANA	gene	122618983	122689164	+	-3.04485	-2.80781	-3.37794	0.00713775	0.128553	-2.2096
ENSG00000301160.1	lncRNA	ENSG00000301160	2	NA	chr9	HAVANA	gene	114811627	114820918	-	-2.74194	-3.70953	-3.35378	0.00743214	0.130081	-2.2102
ENSG00000218018.5	lncRNA	RBM38-AS1	1	OTTHUMG00000134335.2	chr20	HAVANA	gene	57376240	57393062	-	-3.72099	-0.638213	-3.42605	0.00658678	0.124902	-2.21253
ENSG00000207082.1	snRNA	RNU6-171P	3	NA	chr1	ENSEMBL	gene	164639565	164639671	+	2.71536	-0.521405	3.34906	0.00749109	0.130377	-2.21471
ENSG00000113657.13	protein_coding	DPYSL3	2	OTTHUMG00000163437.4	chr5	HAVANA	gene	147390808	147510068	-	2.32809	7.3865	3.69684	0.00420919	0.108556	-2.21479
ENSG00000112419.15	protein_coding	PHACTR2	1	OTTHUMG00000015732.4	chr6	HAVANA	gene	143536845	143831185	+	1.10202	6.81225	3.70111	0.00417982	0.108442	-2.21507
ENSG00000088854.13	protein_coding	DNAAF9	2	OTTHUMG00000031742.2	chr20	HAVANA	gene	3249306	3407669	-	1.28572	6.27113	3.67743	0.00434534	0.10943	-2.2169
ENSG00000286780.1	lncRNA	ENSG00000286780	2	OTTHUMG00000194785.1	chr13	HAVANA	gene	106232131	106371082	-	-2.65165	-3.59096	-3.34887	0.00749354	0.130377	-2.21907
ENSG00000178999.13	protein_coding	AURKB	1	OTTHUMG00000108189.6	chr17	HAVANA	gene	8204733	8210600	-	-2.99245	0.365682	-3.49324	0.00588985	0.120006	-2.2191
ENSG00000308218.1	lncRNA	ENSG00000308218	2	NA	chr10	HAVANA	gene	102120467	102121773	-	2.89751	0.0818506	3.35558	0.00740973	0.129833	-2.21939
ENSG00000261766.1	lncRNA	ENSG00000261766	2	OTTHUMG00000176591.1	chr16	HAVANA	gene	28862166	28863340	-	-2.28236	-1.76445	-3.37748	0.00714322	0.128553	-2.21947
ENSG00000241560.8	lncRNA	ZBTB20-AS1	1	OTTHUMG00000159368.8	chr3	HAVANA	gene	114351771	114388978	+	-3.14047	-1.19681	-3.40727	0.00679634	0.126275	-2.2202
ENSG00000198283.3	protein_coding	OR5B21	2	OTTHUMG00000167519.1	chr11	HAVANA	gene	58506807	58508105	-	-2.69174	-2.33859	-3.36627	0.00727844	0.129464	-2.22193
ENSG00000269220.2	lncRNA	LINC00528	2	OTTHUMG00000186097.1	chr22	HAVANA	gene	17777317	17780519	+	-2.94237	-0.391988	-3.45376	0.00628956	0.12209	-2.22198
ENSG00000173068.19	protein_coding	BNC2	2	OTTHUMG00000019593.13	chr9	HAVANA	gene	16409503	16870843	-	3.18682	5.34914	3.54291	0.00542415	0.116531	-2.22281
ENSG00000166444.19	protein_coding	DENND2B	1	OTTHUMG00000165835.4	chr11	HAVANA	gene	8693351	8910951	-	1.69949	5.68232	3.64215	0.00460467	0.111105	-2.22282
ENSG00000262380.1	lncRNA	ENSG00000262380	2	OTTHUMG00000177383.1	chr16	HAVANA	gene	15683290	15684570	+	-1.94115	-0.280302	-3.42993	0.00654423	0.124484	-2.22442
ENSG00000293456.1	lncRNA	C3orf86P	2	NA	chr3	HAVANA	gene	44421127	44439946	-	3.16027	-1.64965	3.33459	0.00767489	0.1316	-2.22442
ENSG00000177283.8	protein_coding	FZD8	2	OTTHUMG00000017956.2	chr10	HAVANA	gene	35638247	35642296	-	2.7533	2.76879	3.4365	0.00647296	0.123527	-2.22454
ENSG00000078808.20	protein_coding	SDF4	2	OTTHUMG00000001812.7	chr1	HAVANA	gene	1216931	1232031	-	0.785487	6.36377	3.68888	0.00426446	0.108954	-2.22567
ENSG00000306297.1	lncRNA	ENSG00000306297	2	NA	chr15	HAVANA	gene	92810374	92812294	+	-3.68926	-2.59729	-3.36732	0.00726558	0.129464	-2.22571
ENSG00000307669.1	lncRNA	ENSG00000307669	2	NA	chr7	HAVANA	gene	44606952	44607700	+	-2.97602	-0.899933	-3.40838	0.00678375	0.12623	-2.22611
ENSG00000261371.6	protein_coding	PECAM1	2	OTTHUMG00000175829.4	chr17	HAVANA	gene	64319415	64413776	-	1.94733	8.12697	3.72289	0.00403343	0.107182	-2.22613
ENSG00000280135.1	TEC	ENSG00000280135	2	OTTHUMG00000175936.1	chr6	HAVANA	gene	107697299	107700218	-	-3.38677	-1.5713	-3.40851	0.0067823	0.12623	-2.22697
ENSG00000290576.2	lncRNA	ENSG00000290576	2	NA	chr12	HAVANA	gene	100156391	100200557	-	-1.23988	2.76494	-3.58805	0.00503408	0.114294	-2.22701
ENSG00000142686.8	protein_coding	C1orf216	2	OTTHUMG00000004167.4	chr1	HAVANA	gene	35713877	35718894	-	1.14837	4.05811	3.56446	0.00523417	0.115062	-2.22815
ENSG00000214248.3	lncRNA	ENSG00000214248	2	OTTHUMG00000182572.2	chr19	HAVANA	gene	7898804	7903864	-	-3.42597	-1.63799	-3.38841	0.00701389	0.127389	-2.22819
ENSG00000298510.1	lncRNA	ENSG00000298510	2	NA	chr11	HAVANA	gene	159455	164328	-	-2.78577	-3.16284	-3.34759	0.00750955	0.13052	-2.22917
ENSG00000185950.9	protein_coding	IRS2	2	OTTHUMG00000017338.3	chr13	HAVANA	gene	109752695	109786583	-	2.1291	6.39118	3.65134	0.00453562	0.110496	-2.23102
ENSG00000128309.18	protein_coding	MPST	1	OTTHUMG00000150543.2	chr22	HAVANA	gene	37019635	37029821	+	1.30804	5.0399	3.61187	0.00484009	0.113082	-2.2329
ENSG00000283586.1	unitary_pseudogene	GKN3P	2	OTTHUMG00000191776.1	chr2	HAVANA	gene	68921248	68926834	+	-2.45523	-4.14877	-3.33076	0.00772439	0.1316	-2.23311
ENSG00000286848.2	lncRNA	ENSG00000286848	2	OTTHUMG00000129914.5	chr4	HAVANA	gene	70637745	70686816	+	-2.83348	-3.71802	-3.33511	0.00766829	0.1316	-2.23339
ENSG00000278601.1	lncRNA	ENSG00000278601	2	OTTHUMG00000186514.1	chr10	HAVANA	gene	110907483	110908182	+	-1.71102	-0.641654	-3.41802	0.00667556	0.125334	-2.2347
ENSG00000125266.8	protein_coding	EFNB2	2	OTTHUMG00000017324.6	chr13	HAVANA	gene	106489745	106535662	-	1.73842	5.34717	3.61823	0.00478966	0.112558	-2.23693
ENSG00000167670.16	protein_coding	CHAF1A	1	OTTHUMG00000181922.6	chr19	HAVANA	gene	4402640	4445018	+	-1.10188	3.6249	-3.60194	0.00492	0.113665	-2.23914
ENSG00000293480.2	lncRNA	TCAM1P	2	NA	chr17	HAVANA	gene	63849267	63864381	+	-2.51839	-0.738731	-3.44282	0.00640524	0.123101	-2.23955
ENSG00000152932.8	protein_coding	RAB3C	2	OTTHUMG00000097053.4	chr5	HAVANA	gene	58582221	58859394	+	4.73925	1.898	3.35313	0.00744028	0.130081	-2.24183
ENSG00000117791.16	protein_coding	MTARC2	2	OTTHUMG00000037354.6	chr1	HAVANA	gene	220748225	220784815	+	2.65631	3.52962	3.46633	0.00615933	0.121263	-2.24219
ENSG00000103502.14	protein_coding	CDIPT	1	OTTHUMG00000177144.4	chr16	HAVANA	gene	29858357	29863414	-	1.45396	5.29943	3.62016	0.00477445	0.11252	-2.24221
ENSG00000297173.1	lncRNA	ENSG00000297173	2	NA	chr12	HAVANA	gene	101876711	101877492	-	-2.65003	-3.44559	-3.33128	0.00771767	0.1316	-2.2423
ENSG00000239268.6	protein_coding	LINC03051	2	OTTHUMG00000159530.2	chr3	HAVANA	gene	117672154	117997592	-	6.21769	-0.048429	3.32271	0.00782933	0.1316	-2.2443
ENSG00000289603.2	lncRNA	ENSG00000289603	2	NA	chr8	HAVANA	gene	42140199	42143630	+	-2.70644	-3.59299	-3.32915	0.00774521	0.1316	-2.24643
ENSG00000130226.18	protein_coding	DPP6	1	OTTHUMG00000151511.3	chr7	HAVANA	gene	153748133	154894285	+	3.42775	-1.38628	3.31782	0.00789385	0.131975	-2.24715
ENSG00000273687.1	lncRNA	ENSG00000273687	2	OTTHUMG00000186644.1	chr17	HAVANA	gene	35018660	35018991	+	-2.83933	-3.72848	-3.32499	0.00779948	0.1316	-2.24768
ENSG00000256913.1	processed_pseudogene	ENSG00000256913	1	OTTHUMG00000168358.1	chr12	HAVANA	gene	6477714	6480207	+	-2.48922	-3.2096	-3.32747	0.00776708	0.1316	-2.24809
ENSG00000173210.21	protein_coding	ABLIM3	2	OTTHUMG00000129932.3	chr5	HAVANA	gene	149141483	149260542	+	2.20865	5.83615	3.60455	0.0048989	0.113665	-2.24888
ENSG00000019991.18	protein_coding	HGF	2	OTTHUMG00000023804.10	chr7	HAVANA	gene	81699010	81770438	-	3.05733	3.91094	3.47741	0.00604691	0.120376	-2.24891
ENSG00000125734.16	protein_coding	GPR108	1	OTTHUMG00000170129.5	chr19	HAVANA	gene	6729914	6737580	-	0.844026	4.9995	3.62099	0.0047679	0.11249	-2.25234
ENSG00000091831.25	protein_coding	ESR1	2	OTTHUMG00000016103.7	chr6	HAVANA	gene	151656691	152129619	+	1.02493	3.96099	3.55349	0.00533004	0.115572	-2.25261
ENSG00000140525.20	protein_coding	FANCI	1	OTTHUMG00000132993.7	chr15	HAVANA	gene	89243945	89317261	+	-1.67649	4.10296	-3.63967	0.00462353	0.111162	-2.25286
ENSG00000169245.6	protein_coding	CXCL10	2	OTTHUMG00000160887.3	chr4	HAVANA	gene	76021118	76023497	-	-3.77469	1.41489	-3.53908	0.00545868	0.116918	-2.25413
ENSG00000206652.1	snRNA	RNU1-1	3	NA	chr1	ENSEMBL	gene	16514122	16514285	-	-3.16174	-3.02133	-3.33824	0.00762807	0.1316	-2.25481
ENSG00000212451.1	snRNA	RNU11-4P	3	NA	chr8	ENSEMBL	gene	126671522	126671654	+	-2.55853	-3.90547	-3.31934	0.00787374	0.131784	-2.25519
ENSG00000153246.13	protein_coding	PLA2R1	2	OTTHUMG00000154087.4	chr2	HAVANA	gene	159932006	160062615	-	3.0652	5.03024	3.54011	0.00544938	0.116825	-2.25535
ENSG00000297250.1	lncRNA	ENSG00000297250	2	NA	chr19	HAVANA	gene	52008277	52031034	+	-1.87879	-2.56262	-3.33311	0.00769397	0.1316	-2.25554
ENSG00000131398.15	protein_coding	KCNC3	2	OTTHUMG00000044580.5	chr19	HAVANA	gene	50311937	50333515	-	-2.62516	1.70397	-3.54863	0.00537306	0.115925	-2.25571
ENSG00000169733.12	protein_coding	RFNG	1	OTTHUMG00000178512.3	chr17	HAVANA	gene	82047902	82051831	-	0.982002	4.69613	3.59172	0.00500367	0.113937	-2.2558
ENSG00000262381.1	unprocessed_pseudogene	MTATP6P24	2	OTTHUMG00000177351.1	chr16	HAVANA	gene	10724620	10725296	-	-2.46593	-3.71802	-3.32086	0.00785363	0.1316	-2.25595
ENSG00000196562.16	protein_coding	SULF2	2	OTTHUMG00000032675.9	chr20	HAVANA	gene	47656197	47786616	-	1.338	6.45351	3.66568	0.00443001	0.110037	-2.25709
ENSG00000295907.1	lncRNA	ENSG00000295907	2	NA	chr3	HAVANA	gene	128845994	128846629	+	-2.10396	-2.49876	-3.3347	0.00767354	0.1316	-2.25721
ENSG00000293974.1	lncRNA	ENSG00000293974	2	NA	chr20	HAVANA	gene	62377238	62378406	-	-2.30769	-3.53543	-3.32083	0.00785404	0.1316	-2.25909
ENSG00000304322.1	lncRNA	ENSG00000304322	2	NA	chr12	HAVANA	gene	91876615	91877202	-	-3.25954	-3.4754	-3.32693	0.00777407	0.1316	-2.26109
ENSG00000198909.8	protein_coding	MAP3K3	2	OTTHUMG00000178905.1	chr17	HAVANA	gene	63622415	63696305	+	1.30801	6.23349	3.65034	0.00454309	0.110496	-2.26127
ENSG00000242759.10	lncRNA	LINC00882	1	OTTHUMG00000195985.1	chr3	HAVANA	gene	106630469	107240671	-	3.34663	1.80654	3.36389	0.00730745	0.129464	-2.26176
ENSG00000127329.16	protein_coding	PTPRB	1	OTTHUMG00000169499.3	chr12	HAVANA	gene	70515870	70637440	-	2.98953	6.46693	3.60345	0.0049078	0.113665	-2.26375
ENSG00000211514.1	miRNA	MIR454	3	NA	chr17	ENSEMBL	gene	59137758	59137872	-	-2.84464	-3.25488	-3.32841	0.00775491	0.1316	-2.26395
ENSG00000289055.3	lncRNA	ENSG00000289055	2	NA	chr1	HAVANA	gene	244026467	244048286	-	-2.05406	-1.67812	-3.35548	0.007411	0.129833	-2.26501
ENSG00000287823.2	lncRNA	ENSG00000287823	2	OTTHUMG00000193811.1	chr6	HAVANA	gene	170087983	170097234	+	-2.71831	-3.19555	-3.32133	0.00784741	0.1316	-2.26503
ENSG00000020633.19	protein_coding	RUNX3	2	OTTHUMG00000003316.1	chr1	HAVANA	gene	24899511	24965121	-	-2.46937	3.75042	-3.62839	0.00471016	0.112136	-2.26527
ENSG00000119737.6	protein_coding	GPR75	2	OTTHUMG00000129280.3	chr2	HAVANA	gene	53852912	53859967	-	-1.83393	1.09379	-3.44721	0.00635846	0.122562	-2.26534
ENSG00000303168.1	lncRNA	ENSG00000303168	2	NA	chr4	HAVANA	gene	30817016	30821499	+	2.6908	-1.9859	3.3081	0.00802354	0.132735	-2.26539
ENSG00000068971.14	protein_coding	PPP2R5B	1	OTTHUMG00000150043.5	chr11	HAVANA	gene	64917553	64934475	+	1.14607	4.37299	3.55969	0.00527565	0.115062	-2.26724
ENSG00000262420.4	lncRNA	TXNDC11-AS1	2	OTTHUMG00000177468.1	chr16	HAVANA	gene	11741910	11768533	+	-2.51057	-2.40299	-3.3233	0.00782163	0.1316	-2.26755
ENSG00000158716.9	protein_coding	DUSP23	2	OTTHUMG00000022795.3	chr1	HAVANA	gene	159780932	159782543	+	1.51163	3.41692	3.48979	0.00592372	0.120208	-2.26777
ENSG00000275667.1	miRNA	MIR6839	3	NA	chr7	ENSEMBL	gene	64679064	64679176	+	-2.93104	-3.25299	-3.32562	0.00779124	0.1316	-2.26965
ENSG00000291083.2	lncRNA	CYP2B7P	2	NA	chr19	HAVANA	gene	40908423	40950676	+	-3.80914	1.12346	-3.52018	0.00563233	0.119047	-2.27082
ENSG00000279884.1	TEC	ENSG00000279884	2	OTTHUMG00000176283.1	chr2	HAVANA	gene	174545385	174546335	-	-3.04714	-3.02456	-3.33098	0.00772147	0.1316	-2.27157
ENSG00000301982.1	lncRNA	ENSG00000301982	2	NA	chr18	HAVANA	gene	10448368	10488796	-	3.24835	-2.09221	3.30067	0.00812427	0.132735	-2.27183
ENSG00000256040.2	lncRNA	PAPPA-AS1	2	OTTHUMG00000187226.1	chr9	HAVANA	gene	116398157	116400606	-	-2.00629	-0.880621	-3.36376	0.00730904	0.129464	-2.27203
ENSG00000196368.5	protein_coding	NUDT11	2	OTTHUMG00000021531.2	chrX	HAVANA	gene	51490011	51496592	-	3.39043	-0.773303	3.30633	0.00804739	0.132735	-2.27325
ENSG00000289409.3	lncRNA	ENSG00000289409	2	NA	chr3	HAVANA	gene	157087468	157089308	-	-2.11222	-1.71077	-3.35158	0.00745954	0.130084	-2.27331
ENSG00000147813.16	protein_coding	NAPRT	2	OTTHUMG00000156942.6	chr8	HAVANA	gene	143574785	143578649	-	1.17398	4.47087	3.56957	0.00519011	0.115062	-2.27399
ENSG00000297460.1	lncRNA	ENSG00000297460	2	NA	chr11	HAVANA	gene	35050042	35119199	+	-2.61018	-2.85058	-3.3302	0.00773161	0.1316	-2.27416
ENSG00000179348.13	protein_coding	GATA2	2	OTTHUMG00000159689.5	chr3	HAVANA	gene	128479427	128493201	-	1.33906	3.34105	3.48596	0.00596154	0.120376	-2.27459
ENSG00000136636.13	protein_coding	KCTD3	2	OTTHUMG00000037019.4	chr1	HAVANA	gene	215567304	215621807	+	1.4925	5.40638	3.60164	0.00492243	0.113665	-2.27695
ENSG00000301070.1	lncRNA	ENSG00000301070	2	NA	chr2	HAVANA	gene	105103121	105105484	+	-2.74795	-3.78572	-3.30724	0.00803524	0.132735	-2.27718
ENSG00000237976.3	lncRNA	RFX5-AS1	2	OTTHUMG00000012496.1	chr1	HAVANA	gene	151327811	151348027	+	-2.84474	-2.55126	-3.32563	0.00779103	0.1316	-2.27777
ENSG00000293076.2	lncRNA	ENSG00000293076	2	NA	chr7	HAVANA	gene	32728830	32838774	+	1.68445	0.950081	3.36479	0.0072965	0.129464	-2.278
ENSG00000144724.20	protein_coding	PTPRG	2	OTTHUMG00000158660.2	chr3	HAVANA	gene	61561569	62297609	+	3.2312	6.67084	3.60222	0.0049177	0.113665	-2.27884
ENSG00000207258.1	misc_RNA	Y_RNA	3	NA	chr8	ENSEMBL	gene	38744020	38744131	+	5.31336	0.51479	3.30214	0.00810419	0.132735	-2.27895
ENSG00000289103.3	lncRNA	ENSG00000289103	2	NA	chr1	HAVANA	gene	155000799	155002119	-	-1.67151	-0.630306	-3.35905	0.00736687	0.129702	-2.27902
ENSG00000132824.14	protein_coding	SERINC3	2	OTTHUMG00000033087.4	chr20	HAVANA	gene	44496221	44522085	-	1.19377	7.47572	3.68093	0.00432046	0.109305	-2.28081
ENSG00000244618.3	misc_RNA	RN7SL334P	3	NA	chr6	ENSEMBL	gene	25031009	25031287	-	-3.48145	-1.83591	-3.35214	0.00745258	0.130084	-2.28083
ENSG00000298696.1	lncRNA	ENSG00000298696	2	NA	chr7	HAVANA	gene	344857	352103	-	-2.42598	-4.25746	-3.29656	0.00818048	0.133391	-2.2819
ENSG00000013619.15	protein_coding	MAMLD1	2	OTTHUMG00000024157.6	chrX	HAVANA	gene	150361422	150514178	+	-1.9538	4.52651	-3.64588	0.0045765	0.110853	-2.28251
ENSG00000167165.19	protein_coding	UGT1A6	2	OTTHUMG00000059122.10	chr2	HAVANA	gene	233691607	233773300	+	-2.09987	-2.63742	-3.32446	0.00780635	0.1316	-2.28342
ENSG00000304130.1	lncRNA	ENSG00000304130	2	NA	chr19	HAVANA	gene	13839189	13841282	+	-2.65046	-2.43284	-3.32399	0.00781256	0.1316	-2.28381
ENSG00000115415.21	protein_coding	STAT1	1	OTTHUMG00000132699.7	chr2	HAVANA	gene	190908460	191020960	-	-1.55672	7.43936	-3.72042	0.00404976	0.10735	-2.28406
ENSG00000290444.2	lncRNA	FAM238A	2	NA	chr10	HAVANA	gene	26579472	26594346	+	-3.41021	-1.51811	-3.37462	0.00717742	0.129015	-2.28535
ENSG00000270823.1	lncRNA	ENSG00000270823	2	OTTHUMG00000185221.1	chr7	HAVANA	gene	130495794	130498427	-	-2.59757	-3.31571	-3.30138	0.00811466	0.132735	-2.28603
ENSG00000288823.2	lncRNA	ENSG00000288823	2	NA	chr10	HAVANA	gene	73744125	73782590	-	-1.6239	-0.903021	-3.36541	0.0072889	0.129464	-2.28714
ENSG00000261758.2	lncRNA	STAG1-DT	2	OTTHUMG00000195423.1	chr3	HAVANA	gene	136751534	136806308	+	-2.2851	-1.96985	-3.33127	0.00771774	0.1316	-2.29002
ENSG00000129535.13	protein_coding	NRL	2	OTTHUMG00000028789.5	chr14	HAVANA	gene	24078662	24115010	-	-1.62852	0.555161	-3.40375	0.00683643	0.126632	-2.29045
ENSG00000201710.1	snoRNA	ENSG00000201710	3	NA	chr14	ENSEMBL	gene	100979992	100980066	+	2.22078	-3.03685	3.28629	0.00832284	0.134089	-2.29047
ENSG00000189431.8	protein_coding	RASSF10	2	OTTHUMG00000166184.3	chr11	HAVANA	gene	13009316	13012119	+	-2.32712	-1.01657	-3.3441	0.00755365	0.131048	-2.292
ENSG00000288555.2	lncRNA	ENSG00000288555	2	OTTHUMG00000195948.1	chr21	HAVANA	gene	15190406	15224479	-	-2.62809	-3.82798	-3.29417	0.0082134	0.133528	-2.29512
ENSG00000251476.2	processed_pseudogene	MTCO1P31	2	OTTHUMG00000161664.2	chr5	HAVANA	gene	5396477	5396968	-	-1.60994	-1.59874	-3.32726	0.0077698	0.1316	-2.29651
ENSG00000265432.1	miRNA	MIR4308	3	NA	chr14	ENSEMBL	gene	54878113	54878193	-	-2.85108	-3.62473	-3.29469	0.00820628	0.133528	-2.29825
ENSG00000104147.9	protein_coding	OIP5	2	OTTHUMG00000130251.5	chr15	HAVANA	gene	41309273	41332591	-	-2.45675	-0.909063	-3.35103	0.0074665	0.13013	-2.29994
ENSG00000182326.17	protein_coding	C1S	1	OTTHUMG00000150305.5	chr12	HAVANA	gene	6988259	7071032	+	3.90974	8.23135	3.63961	0.00462393	0.111162	-2.30066
ENSG00000163697.18	protein_coding	APBB2	2	OTTHUMG00000160416.12	chr4	HAVANA	gene	40810027	41216714	-	2.96276	6.34412	3.58175	0.00508673	0.114633	-2.30257
ENSG00000165480.16	protein_coding	SKA3	1	OTTHUMG00000016539.5	chr13	HAVANA	gene	21153595	21176552	-	-3.50343	-0.582315	-3.38801	0.00701855	0.127389	-2.30331
ENSG00000308325.1	lncRNA	ENSG00000308325	2	NA	chr5	HAVANA	gene	78983047	78984685	-	-3.16778	-3.11312	-3.29955	0.00813958	0.132866	-2.30425
ENSG00000267898.2	lncRNA	ENSG00000267898	2	OTTHUMG00000183331.1	chr19	HAVANA	gene	48963948	48965158	+	-2.45527	-3.12624	-3.28758	0.00830482	0.134089	-2.30479
ENSG00000275418.2	lncRNA	LINC03110	2	OTTHUMG00000186656.1	chr18	HAVANA	gene	58658502	58669358	+	-3.2136	-2.64932	-3.3167	0.00790868	0.132135	-2.305
ENSG00000298862.1	lncRNA	ENSG00000298862	2	NA	chr3	HAVANA	gene	101518664	101523803	+	-2.60887	-3.67779	-3.29038	0.00826587	0.13386	-2.30509
ENSG00000303136.1	lncRNA	ENSG00000303136	2	NA	chr17	HAVANA	gene	64385447	64414085	+	2.65903	0.703536	3.30832	0.00802066	0.132735	-2.30564
ENSG00000256356.1	processed_pseudogene	HSPA8P5	1	OTTHUMG00000168122.1	chr12	HAVANA	gene	4097451	4099519	+	-2.10388	-1.90385	-3.31383	0.00794685	0.132424	-2.30605
ENSG00000288939.2	lncRNA	ENSG00000288939	2	NA	chr18	HAVANA	gene	8974228	9102569	-	-2.88225	-2.56531	-3.31075	0.00798803	0.132688	-2.30691
ENSG00000151012.13	protein_coding	SLC7A11	2	OTTHUMG00000133396.2	chr4	HAVANA	gene	138164097	138242349	-	-3.15528	2.14583	-3.53077	0.00553439	0.117779	-2.3074
ENSG00000275180.3	lncRNA	ENSG00000275180	2	OTTHUMG00000187150.1	chr12	HAVANA	gene	62603193	62605503	+	-1.49283	2.05468	-3.48409	0.00598008	0.120376	-2.30795
ENSG00000049192.15	protein_coding	ADAMTS6	2	OTTHUMG00000074079.8	chr5	HAVANA	gene	65148738	65481920	-	1.62239	3.49814	3.4757	0.00606414	0.120482	-2.30848
ENSG00000179873.14	protein_coding	NLRP11	2	OTTHUMG00000180921.7	chr19	HAVANA	gene	55785397	55836800	-	-2.42025	-3.94173	-3.28162	0.00838842	0.134259	-2.30882
ENSG00000157103.13	protein_coding	SLC6A1	2	OTTHUMG00000044208.9	chr3	HAVANA	gene	10992186	11039247	+	4.92668	2.45041	3.32256	0.00783123	0.1316	-2.30998
ENSG00000182376.2	lncRNA	ENSG00000182376	2	OTTHUMG00000173435.1	chr16	HAVANA	gene	88742767	88745748	+	-2.42056	-3.94173	-3.27904	0.00842489	0.134311	-2.31265
ENSG00000305450.1	lncRNA	ENSG00000305450	2	NA	chr18	HAVANA	gene	50878209	50878990	-	-2.39414	-4.01542	-3.27433	0.00849192	0.134311	-2.31315
ENSG00000272334.1	lncRNA	ENSG00000272334	2	OTTHUMG00000185481.1	chr3	HAVANA	gene	36973117	36973672	-	-2.55478	-2.77789	-3.29098	0.00825758	0.13386	-2.31341
ENSG00000129493.15	protein_coding	HEATR5A	1	OTTHUMG00000169043.5	chr14	HAVANA	gene	31291788	31420550	-	0.979102	5.07577	3.57907	0.00510927	0.114827	-2.31455
ENSG00000168631.14	protein_coding	MUCL3	2	OTTHUMG00000031104.5	chr6	HAVANA	gene	30934523	30954221	+	-3.89273	-1.10615	-3.39759	0.00690715	0.127165	-2.31479
ENSG00000133056.14	protein_coding	PIK3C2B	2	OTTHUMG00000036101.4	chr1	HAVANA	gene	204422628	204494805	-	-0.821109	5.83493	-3.64586	0.00457666	0.110853	-2.3156
ENSG00000261600.2	lncRNA	ENSG00000261600	2	OTTHUMG00000176044.2	chr2	HAVANA	gene	91571535	91580886	+	-1.78595	-2.23698	-3.30562	0.00805704	0.132735	-2.31671
ENSG00000277969.3	lncRNA	ENSG00000277969	2	OTTHUMG00000188496.1	chr17	HAVANA	gene	38702363	38704747	+	-1.63791	0.813653	-3.40604	0.00681041	0.126382	-2.31716
ENSG00000274717.1	processed_pseudogene	ADAMTS7P5	2	OTTHUMG00000188039.1	chr22	HAVANA	gene	42791814	42794313	-	-2.13543	-0.753002	-3.33965	0.00761008	0.1316	-2.31722
ENSG00000277324.2	lncRNA	ENSG00000277324	2	OTTHUMG00000186552.1	chr18	HAVANA	gene	54260666	54270063	-	-2.58764	-3.10345	-3.29033	0.00826653	0.13386	-2.31861
ENSG00000257894.3	lncRNA	ENSG00000257894	2	OTTHUMG00000170063.2	chr12	HAVANA	gene	79341199	79503396	-	2.98607	-0.522569	3.28198	0.00838331	0.134259	-2.31873
ENSG00000144366.17	protein_coding	GULP1	1	OTTHUMG00000132647.5	chr2	HAVANA	gene	188291669	188595931	+	2.09918	4.37711	3.49735	0.00584985	0.120006	-2.31919
ENSG00000284830.1	lncRNA	ENSG00000284830	2	OTTHUMG00000192435.1	chr1	HAVANA	gene	111745299	111755537	-	-1.78692	-2.04491	-3.30111	0.00811829	0.132735	-2.31943
ENSG00000232472.1	processed_pseudogene	EEF1B2P3	2	OTTHUMG00000021274.1	chrX	HAVANA	gene	24788392	24789069	-	-1.68682	-0.649284	-3.33136	0.00771663	0.1316	-2.32046
ENSG00000123636.20	protein_coding	BAZ2B	1	OTTHUMG00000132027.9	chr2	HAVANA	gene	159315312	159616569	-	0.697279	7.70724	3.67481	0.00436404	0.10943	-2.32175
ENSG00000277605.1	misc_RNA	Metazoa_SRP	3	NA	chrX	ENSEMBL	gene	47476822	47477152	-	-2.70593	-3.32335	-3.2809	0.0083986	0.134265	-2.3222
ENSG00000285570.2	lncRNA	ENSG00000285570	2	OTTHUMG00000193260.1	chr1	HAVANA	gene	156689676	156704757	+	-2.90953	-3.58757	-3.28325	0.0083655	0.134259	-2.32227
ENSG00000258875.7	lncRNA	ENSG00000258875	1	OTTHUMG00000171098.3	chr14	HAVANA	gene	91241950	91252211	+	-2.11937	0.726226	-3.41132	0.00675065	0.126046	-2.32483
ENSG00000254556.1	lncRNA	ENSG00000254556	2	OTTHUMG00000165426.1	chr8	HAVANA	gene	11136898	11138607	-	-1.61548	2.04158	-3.49491	0.00587357	0.120006	-2.32702
ENSG00000126947.13	protein_coding	ARMCX1	2	OTTHUMG00000022033.3	chrX	HAVANA	gene	101550547	101554700	+	2.43473	4.36211	3.45937	0.00623107	0.12165	-2.32742
ENSG00000132016.12	protein_coding	BRME1	1	OTTHUMG00000181851.2	chr19	HAVANA	gene	13882348	13906452	-	-1.25817	0.925365	-3.40377	0.00683625	0.126632	-2.32874
ENSG00000084734.9	protein_coding	GCKR	1	OTTHUMG00000128426.3	chr2	HAVANA	gene	27496839	27523684	+	2.19212	-0.974163	3.2731	0.00850938	0.134354	-2.32924
ENSG00000301078.1	lncRNA	ENSG00000301078	2	NA	chr5	HAVANA	gene	149960136	149960577	-	-2.64709	-4.24141	-3.26436	0.00863536	0.135063	-2.32993
ENSG00000251365.7	lncRNA	LINC02236	2	OTTHUMG00000161703.4	chr5	HAVANA	gene	6765885	6833120	+	-2.22007	0.363563	-3.39514	0.00693544	0.127165	-2.33012
ENSG00000136541.15	protein_coding	ERMN	2	OTTHUMG00000153843.6	chr2	HAVANA	gene	157318631	157327713	-	-3.22282	-0.20826	-3.42024	0.00665082	0.125101	-2.33049
ENSG00000275291.1	snRNA	RNVU1-26	3	NA	chr1	ENSEMBL	gene	144523860	144524021	-	-2.49103	-4.27551	-3.26243	0.00866353	0.135242	-2.33134
ENSG00000307885.1	lncRNA	ENSG00000307885	2	NA	chrX	HAVANA	gene	41083667	41084664	-	-2.49103	-4.27551	-3.26243	0.00866353	0.135242	-2.33134
ENSG00000211771.1	TR_J_gene	TRBJ2-7	2	OTTHUMG00000158906.3	chr7	HAVANA	gene	142797456	142797502	+	-3.00953	-1.73774	-3.32451	0.00780578	0.1316	-2.33138
ENSG00000207221.1	snoRNA	SNORA70E	3	NA	chr11	ENSEMBL	gene	83041464	83041598	-	-2.70177	-1.79004	-3.30478	0.00806843	0.132735	-2.33157
ENSG00000291137.2	lncRNA	GBA1LP	2	NA	chr1	HAVANA	gene	155210695	155228027	-	-1.47936	0.507876	-3.38194	0.00709009	0.128052	-2.33187
ENSG00000278463.2	protein_coding	H2AC4	2	OTTHUMG00000014420.2	chr6	HAVANA	gene	26033092	26033618	-	-2.39299	0.263889	-3.40104	0.00686744	0.126875	-2.33231
ENSG00000205592.16	protein_coding	MUC19	1	OTTHUMG00000060732.36	chr12	HAVANA	gene	40393395	40570832	+	1.87668	-0.529254	3.28462	0.0083462	0.13422	-2.33373
ENSG00000154832.16	protein_coding	CXXC1	2	OTTHUMG00000132670.12	chr18	HAVANA	gene	50282343	50287839	-	0.769373	5.02137	3.57643	0.00513163	0.115062	-2.33381
ENSG00000183347.15	protein_coding	GBP6	2	OTTHUMG00000010123.1	chr1	HAVANA	gene	89364059	89388160	+	-2.37658	-1.31008	-3.3342	0.00767999	0.1316	-2.33383
ENSG00000110245.12	protein_coding	APOC3	2	OTTHUMG00000046115.8	chr11	HAVANA	gene	116829706	116833072	+	4.8201	-1.41551	3.25758	0.00873438	0.13563	-2.33402
ENSG00000278861.1	TEC	ENSG00000278861	2	OTTHUMG00000168699.1	chr12	HAVANA	gene	123655528	123656128	+	-1.93339	-0.843829	-3.33539	0.00766466	0.1316	-2.33409
ENSG00000106624.11	protein_coding	AEBP1	1	OTTHUMG00000023362.21	chr7	HAVANA	gene	44104345	44114562	+	4.95545	8.28827	3.59861	0.0049471	0.113672	-2.33414
ENSG00000298190.1	lncRNA	ENSG00000298190	2	NA	chr9	HAVANA	gene	36113859	36145009	-	-2.45459	-3.41664	-3.27395	0.00849732	0.134311	-2.33469
ENSG00000299722.1	lncRNA	ENSG00000299722	2	NA	chr1	HAVANA	gene	226186742	226222498	+	-2.48755	-3.64538	-3.26878	0.00857145	0.13493	-2.33635
ENSG00000232300.1	lncRNA	FAM215B	2	OTTHUMG00000190258.1	chr17	HAVANA	gene	46558830	46562795	-	-1.43143	-0.655184	-3.32795	0.00776082	0.1316	-2.33849
ENSG00000234840.3	lncRNA	LINC01239	2	OTTHUMG00000019696.2	chr9	HAVANA	gene	22640681	22824213	+	2.23863	1.03487	3.31319	0.00795535	0.132493	-2.34022
ENSG00000310475.1	lncRNA	ENSG00000310475	2	NA	chr1	HAVANA	gene	150186935	150192048	+	-1.55391	-2.139	-3.28311	0.00836744	0.134259	-2.34129
ENSG00000258355.1	lncRNA	ENSG00000258355	1	OTTHUMG00000170086.1	chr12	HAVANA	gene	106245613	106246956	-	-2.9491	-2.82271	-3.28615	0.00832484	0.134089	-2.34188
ENSG00000197472.15	protein_coding	ZNF695	2	OTTHUMG00000040707.7	chr1	HAVANA	gene	246945547	247008093	-	-2.26361	-1.32288	-3.31494	0.00793208	0.132251	-2.34263
ENSG00000170485.17	protein_coding	NPAS2	1	OTTHUMG00000130675.8	chr2	HAVANA	gene	100820139	100996829	+	1.20015	3.92161	3.48255	0.00599547	0.120376	-2.34447
ENSG00000268403.4	lncRNA	ENSG00000268403	2	OTTHUMG00000187446.1	chr11	HAVANA	gene	9459548	9460702	-	-1.779	0.0599775	-3.3579	0.00738105	0.129702	-2.34467
ENSG00000287549.1	lncRNA	ENSG00000287549	2	OTTHUMG00000194554.1	chrX	HAVANA	gene	41008427	41029306	-	-2.53018	-3.64035	-3.25827	0.00872425	0.13563	-2.34492
ENSG00000309117.1	lncRNA	ENSG00000309117	2	NA	chr5	HAVANA	gene	157714153	157731684	-	-2.5524	-2.3555	-3.29228	0.00823957	0.133851	-2.34586
ENSG00000188803.15	protein_coding	SHISA6	2	OTTHUMG00000154121.7	chr17	HAVANA	gene	11241213	11564063	+	4.30052	-0.000962051	3.25634	0.00875266	0.135727	-2.34662
ENSG00000036473.9	protein_coding	OTC	2	OTTHUMG00000022727.4	chrX	HAVANA	gene	38327598	38422908	+	4.00514	-1.76607	3.24799	0.00887652	0.136393	-2.34669
ENSG00000006634.8	protein_coding	DBF4	2	OTTHUMG00000131034.7	chr7	HAVANA	gene	87876216	87909553	+	-1.47034	3.03195	-3.51727	0.0056596	0.119171	-2.34731
ENSG00000288067.1	lncRNA	ENSG00000288067	2	OTTHUMG00000195626.1	chr8	HAVANA	gene	134190383	134390487	-	-2.68597	-3.08159	-3.26563	0.00861694	0.135004	-2.34772
ENSG00000127423.11	protein_coding	AUNIP	2	OTTHUMG00000007372.2	chr1	HAVANA	gene	25831913	25859458	-	-3.16934	-2.44192	-3.30046	0.00812719	0.132735	-2.34803
ENSG00000293414.2	lncRNA	TMEM277P	2	NA	chr19	HAVANA	gene	50803895	50818883	+	-1.64622	-2.86015	-3.2592	0.00871065	0.13563	-2.35097
ENSG00000070214.17	protein_coding	SLC44A1	2	OTTHUMG00000020421.6	chr9	HAVANA	gene	105244622	105439171	+	1.35768	6.60887	3.61801	0.00479135	0.112558	-2.35103
ENSG00000126353.4	protein_coding	CCR7	2	OTTHUMG00000133375.5	chr17	HAVANA	gene	40551081	40565472	-	-4.80445	1.81095	-3.52027	0.00563156	0.119047	-2.3516
ENSG00000275714.2	protein_coding	H3C1	2	OTTHUMG00000014418.2	chr6	HAVANA	gene	26020451	26020958	+	-2.26958	0.229124	-3.36906	0.00724456	0.129464	-2.35229
ENSG00000233411.1	lncRNA	ENSG00000233411	2	OTTHUMG00000040633.1	chr1	HAVANA	gene	167457383	167458661	-	-2.42426	-0.360069	-3.36369	0.00730988	0.129464	-2.35286
ENSG00000285712.2	lncRNA	ENSG00000285712	2	OTTHUMG00000192900.1	chr10	HAVANA	gene	43325833	43362711	-	-3.06639	-2.65406	-3.28377	0.00835813	0.134259	-2.35345
ENSG00000309433.1	lncRNA	ENSG00000309433	2	NA	chr1	HAVANA	gene	234600258	234601365	+	-2.67774	-3.87254	-3.2543	0.00878277	0.135752	-2.35477
ENSG00000298585.1	lncRNA	ENSG00000298585	2	NA	chr19	HAVANA	gene	45501195	45506865	-	-2.76489	-3.22543	-3.26471	0.00863035	0.135063	-2.35497
ENSG00000128394.17	protein_coding	APOBEC3F	1	OTTHUMG00000151080.4	chr22	HAVANA	gene	39040604	39055972	+	-1.72289	2.68773	-3.50786	0.00574868	0.119565	-2.35581
ENSG00000206658.1	snRNA	RNU6-1039P	3	NA	chr9	ENSEMBL	gene	110369592	110369698	-	2.9875	-2.5425	3.24045	0.00898996	0.136668	-2.35645
ENSG00000152583.13	protein_coding	SPARCL1	1	OTTHUMG00000130605.5	chr4	HAVANA	gene	87473335	87531061	-	6.5138	8.42305	3.50301	0.0057951	0.119882	-2.35683
ENSG00000240014.3	misc_RNA	RN7SL254P	3	NA	chr4	ENSEMBL	gene	147808926	147809209	+	2.6147	-0.886256	3.25135	0.00882646	0.135865	-2.35729
ENSG00000114698.15	protein_coding	PLSCR4	2	OTTHUMG00000159415.15	chr3	HAVANA	gene	146192335	146251179	-	3.71571	5.28168	3.45348	0.00629253	0.12209	-2.3583
ENSG00000303747.1	lncRNA	ENSG00000303747	2	NA	chr2	HAVANA	gene	3156428	3186513	-	-1.69323	-0.52857	-3.32163	0.00784355	0.1316	-2.35891
ENSG00000300272.1	lncRNA	ENSG00000300272	2	NA	chr5	HAVANA	gene	170317889	170331241	-	-2.71283	-3.59299	-3.25332	0.00879728	0.135752	-2.36023
ENSG00000204291.12	protein_coding	COL15A1	2	OTTHUMG00000020351.6	chr9	HAVANA	gene	98943179	99070787	+	4.18014	6.16783	3.486	0.00596119	0.120376	-2.3604
ENSG00000289883.2	lncRNA	ENEMAL	2	NA	chr11	HAVANA	gene	65476202	65477572	-	-1.31513	0.54689	-3.35291	0.00744297	0.130081	-2.36071
ENSG00000211898.8	IG_C_gene	IGHD	2	OTTHUMG00000152538.2	chr14	HAVANA	gene	105836765	105845677	-	-4.15967	1.563	-3.47783	0.00604269	0.120376	-2.36087
ENSG00000268081.4	lncRNA	ENSG00000268081	2	OTTHUMG00000182850.1	chr19	HAVANA	gene	21542901	21569265	-	-1.57148	1.38779	-3.41252	0.00673714	0.126046	-2.36652
ENSG00000118976.5	processed_pseudogene	OTUD4P1	1	OTTHUMG00000168119.1	chr12	HAVANA	gene	3839459	3842525	+	-2.30674	-2.62796	-3.25304	0.00880145	0.135752	-2.36668
ENSG00000128606.13	protein_coding	LRRC17	1	OTTHUMG00000157210.4	chr7	HAVANA	gene	102913000	102945111	+	3.33965	1.956	3.30782	0.00802738	0.132735	-2.3669
ENSG00000200209.1	misc_RNA	Y_RNA	3	NA	chr19	ENSEMBL	gene	38294544	38294636	+	-2.32954	-4.27551	-3.23802	0.00902676	0.136971	-2.36726
ENSG00000131323.17	protein_coding	TRAF3	1	OTTHUMG00000171902.3	chr14	HAVANA	gene	102777449	102911500	+	-1.28398	5.67309	-3.61861	0.00478668	0.112558	-2.36742
ENSG00000238063.4	lncRNA	LINC01685	2	OTTHUMG00000000481.16	chr1	HAVANA	gene	38474825	38516520	+	-3.1126	-2.40125	-3.27743	0.0084477	0.134311	-2.36902
ENSG00000240449.2	lncRNA	REPIN1-AS1	1	OTTHUMG00000158322.1	chr7	HAVANA	gene	150362658	150372590	-	-2.04848	-1.96477	-3.26793	0.00858377	0.134968	-2.36939
ENSG00000288875.3	lncRNA	ENSG00000288875	2	NA	chr10	HAVANA	gene	88049194	88104433	-	-3.64773	-2.71312	-3.27616	0.00846576	0.134311	-2.37015
ENSG00000251400.1	processed_pseudogene	ALDH7A1P1	1	OTTHUMG00000162511.1	chr5	HAVANA	gene	77290268	77291800	+	4.72676	-0.694736	3.23475	0.00907672	0.137044	-2.37083
ENSG00000228079.2	lncRNA	ENSG00000228079	2	OTTHUMG00000152631.2	chr2	HAVANA	gene	64086353	64088246	-	-2.59093	-2.15281	-3.27721	0.0084509	0.134311	-2.37267
ENSG00000188610.12	protein_coding	FAM72B	2	OTTHUMG00000185025.1	chr1	HAVANA	gene	121167646	121185539	-	-1.83235	-1.18116	-3.29404	0.00821529	0.133528	-2.37315
ENSG00000302316.1	lncRNA	ENSG00000302316	2	NA	chr4	HAVANA	gene	128595754	128600675	-	-2.21942	-4.29616	-3.23308	0.00910221	0.137088	-2.37372
ENSG00000198680.6	protein_coding	TUSC1	2	OTTHUMG00000159591.1	chr9	HAVANA	gene	25676969	25678444	-	1.98514	2.59577	3.35879	0.00737009	0.129702	-2.37572
ENSG00000144843.12	protein_coding	ADPRH	2	OTTHUMG00000159420.2	chr3	HAVANA	gene	119579268	119589945	+	0.859936	4.26206	3.5006	0.00581832	0.119882	-2.37678
ENSG00000132694.20	protein_coding	ARHGEF11	2	OTTHUMG00000041292.1	chr1	HAVANA	gene	156934840	157046903	-	0.946129	6.58158	3.60339	0.00490828	0.113665	-2.37684
ENSG00000232328.4	lncRNA	ENSG00000232328	2	OTTHUMG00000153025.4	chr2	HAVANA	gene	236733289	236755151	+	3.24596	-2.77891	3.22613	0.00920936	0.137515	-2.37727
ENSG00000300148.1	lncRNA	ENSG00000300148	2	NA	chr16	HAVANA	gene	89601774	89605759	-	-3.82505	-2.43904	-3.29101	0.0082572	0.13386	-2.37783
ENSG00000243659.1	processed_pseudogene	ENSG00000243659	1	OTTHUMG00000004409.1	chr1	HAVANA	gene	27311240	27311838	+	-2.3685	-2.33494	-3.25728	0.00873888	0.13563	-2.37903
ENSG00000294292.1	lncRNA	ENSG00000294292	2	NA	chr17	HAVANA	gene	59173326	59173900	+	-2.85322	-3.75148	-3.24047	0.00898963	0.136668	-2.37956
ENSG00000281398.4	lncRNA	SNHG4	2	OTTHUMG00000189582.3	chr5	HAVANA	gene	139274102	139284899	+	-2.2943	2.56278	-3.47988	0.00602213	0.120376	-2.37977
ENSG00000279349.1	TEC	ENSG00000279349	2	OTTHUMG00000175752.1	chr3	HAVANA	gene	112525548	112528142	-	-3.17459	-2.30415	-3.26887	0.00857022	0.13493	-2.38034
ENSG00000163600.13	protein_coding	ICOS	2	OTTHUMG00000132880.3	chr2	HAVANA	gene	203936763	203961577	+	-3.74129	1.1241	-3.46642	0.00615837	0.121263	-2.38135
ENSG00000278177.1	lncRNA	ENSG00000278177	2	OTTHUMG00000187253.1	chr13	HAVANA	gene	93226612	93227317	-	3.15045	-2.06549	3.22509	0.00922557	0.137515	-2.38147
ENSG00000240457.3	misc_RNA	RN7SL472P	3	NA	chr14	ENSEMBL	gene	102077180	102077472	-	-2.96774	-2.7684	-3.25795	0.00872908	0.13563	-2.38159
ENSG00000286069.3	lncRNA	ENSG00000286069	2	OTTHUMG00000193511.2	chr12	HAVANA	gene	53739611	53898976	+	-2.69418	-3.4567	-3.23865	0.00901722	0.136894	-2.38175
ENSG00000296159.1	lncRNA	ENSG00000296159	2	NA	chr19	HAVANA	gene	19822559	19866762	-	-2.90778	-1.75502	-3.28622	0.00832392	0.134089	-2.38183
ENSG00000289285.2	lncRNA	ENSG00000289285	2	NA	chr9	HAVANA	gene	124868225	124869124	-	-1.71039	-1.17819	-3.2888	0.00828788	0.133991	-2.38207
ENSG00000241535.1	processed_pseudogene	CBX5P1	1	OTTHUMG00000159062.2	chr3	HAVANA	gene	88095408	88095968	-	-1.84931	-2.70047	-3.24964	0.00885192	0.136085	-2.38241
ENSG00000115602.17	protein_coding	IL1RL1	2	OTTHUMG00000130782.4	chr2	HAVANA	gene	102311502	102352037	+	2.67958	2.40154	3.33543	0.00766408	0.1316	-2.38296
ENSG00000233892.1	processed_pseudogene	PAIP1P1	1	OTTHUMG00000034813.2	chr6	HAVANA	gene	30186798	30188614	-	-1.67284	0.161205	-3.33683	0.0076462	0.1316	-2.38567
ENSG00000101096.20	protein_coding	NFATC2	2	OTTHUMG00000032747.4	chr20	HAVANA	gene	51386957	51562831	-	-1.68624	5.08661	-3.59299	0.00499317	0.113937	-2.38576
ENSG00000286850.2	lncRNA	ENSG00000286850	2	OTTHUMG00000194240.1	chr9	HAVANA	gene	94483609	94554188	-	-2.16349	-0.819307	-3.30717	0.00803616	0.132735	-2.38604
ENSG00000300906.1	lncRNA	ENSG00000300906	2	NA	chr4	HAVANA	gene	10828868	10889531	+	-2.78793	-2.85442	-3.25369	0.00879183	0.135752	-2.38639
ENSG00000288995.1	lncRNA	ENSG00000288995	2	NA	chr9	HAVANA	gene	126819282	126820987	+	-1.96586	1.50172	-3.40654	0.00680468	0.126352	-2.38979
ENSG00000208028.1	miRNA	MIR616	3	NA	chr12	ENSEMBL	gene	57519163	57519259	-	-3.04026	-0.872694	-3.303	0.00809253	0.132735	-2.39132
ENSG00000268670.1	lncRNA	ENSG00000268670	2	OTTHUMG00000181793.1	chr19	HAVANA	gene	4061615	4062749	-	-1.27869	1.4125	-3.38401	0.00706559	0.127685	-2.39169
ENSG00000289960.2	lncRNA	ENSG00000289960	2	NA	chr22	HAVANA	gene	19854910	19867420	+	-1.71864	-1.64847	-3.27616	0.00846582	0.134311	-2.39312
ENSG00000151725.12	protein_coding	CENPU	2	OTTHUMG00000160499.20	chr4	HAVANA	gene	184694085	184734130	-	-2.3482	1.48218	-3.42258	0.00662499	0.12508	-2.39331
ENSG00000214465.3	processed_pseudogene	SMARCE1P6	1	OTTHUMG00000151936.2	chr2	HAVANA	gene	26149204	26150731	+	-2.41562	-2.64616	-3.24514	0.00891923	0.136507	-2.3935
ENSG00000258749.1	lncRNA	ENSG00000258749	2	OTTHUMG00000171507.1	chr14	HAVANA	gene	99512501	99513576	+	-2.69344	-2.09093	-3.26562	0.00861716	0.135004	-2.39395
ENSG00000270820.9	lncRNA	USP34-DT	2	OTTHUMG00000185251.2	chr2	HAVANA	gene	61470077	61495188	+	-1.16619	1.65361	-3.39328	0.00695705	0.127165	-2.39501
ENSG00000289434.3	lncRNA	ENSG00000289434	2	NA	chr7	HAVANA	gene	128221237	128263529	-	-2.45371	-3.3719	-3.22375	0.00924644	0.13769	-2.39637
ENSG00000078900.16	protein_coding	TP73	1	OTTHUMG00000000610.7	chr1	HAVANA	gene	3652516	3736201	+	-3.03137	-0.175343	-3.36839	0.00725261	0.129464	-2.39643
ENSG00000223754.1	lncRNA	ENSG00000223754	2	OTTHUMG00000151894.1	chr2	HAVANA	gene	24199839	24201698	-	-2.87867	-3.72633	-3.22531	0.00922213	0.137515	-2.39659
ENSG00000254081.2	lncRNA	LINC01299	1	OTTHUMG00000164373.3	chr8	HAVANA	gene	65526738	65562781	-	-2.64709	-4.39991	-3.21906	0.00931985	0.138048	-2.3968
ENSG00000307524.1	lncRNA	ENSG00000307524	2	NA	chr10	HAVANA	gene	3852079	3852538	-	-2.64709	-4.39991	-3.21906	0.00931985	0.138048	-2.3968
ENSG00000297896.1	lncRNA	ENSG00000297896	2	NA	chr12	HAVANA	gene	56188382	56193784	+	-2.67855	-3.23404	-3.23402	0.00908781	0.137074	-2.39713
ENSG00000071539.14	protein_coding	TRIP13	1	OTTHUMG00000090349.28	chr5	HAVANA	gene	892884	919357	+	-2.71255	1.5354	-3.44305	0.00640269	0.123101	-2.39717
ENSG00000269954.2	lncRNA	ENSG00000269954	2	OTTHUMG00000165416.2	chr8	HAVANA	gene	11552488	11564694	-	-2.76649	-3.71404	-3.22858	0.00917152	0.13737	-2.39776
ENSG00000126838.10	protein_coding	PZP	2	OTTHUMG00000154915.3	chr12	HAVANA	gene	9148840	9208395	-	3.75901	-0.326104	3.22199	0.00927382	0.137895	-2.39813
ENSG00000235185.2	lncRNA	MICOS10-DT	2	OTTHUMG00000002711.1	chr1	HAVANA	gene	19566701	19596873	-	-2.57385	-4.41595	-3.2172	0.00934903	0.138048	-2.39875
ENSG00000298462.1	lncRNA	ENSG00000298462	2	NA	chr10	HAVANA	gene	132447507	132448575	-	-2.57385	-4.41595	-3.2172	0.00934903	0.138048	-2.39875
ENSG00000310273.1	lncRNA	ENSG00000310273	2	NA	chr16	HAVANA	gene	31869800	31870223	+	-2.57385	-4.41595	-3.2172	0.00934903	0.138048	-2.39875
ENSG00000134240.12	protein_coding	HMGCS2	2	OTTHUMG00000012101.4	chr1	HAVANA	gene	119748002	119768905	-	5.75332	-0.0967966	3.21406	0.0093987	0.138281	-2.39892
ENSG00000272371.2	lncRNA	ENSG00000272371	2	OTTHUMG00000185810.1	chr1	HAVANA	gene	52553354	52599042	+	-2.58121	-3.64035	-3.22674	0.00919999	0.137515	-2.40007
ENSG00000255240.7	lncRNA	ENSG00000255240	1	OTTHUMG00000167434.3	chr11	HAVANA	gene	58933643	59107085	-	-2.82645	0.862167	-3.41282	0.00673377	0.126046	-2.4002
ENSG00000304822.1	lncRNA	ENSG00000304822	2	NA	chr9	HAVANA	gene	137249034	137249845	+	-2.71159	-4.38547	-3.21671	0.00935678	0.138048	-2.40106
ENSG00000293251.3	lncRNA	ENSG00000293251	2	NA	chr12	HAVANA	gene	14356842	14365512	-	-2.71159	-4.38547	-3.21671	0.00935678	0.138048	-2.40106
ENSG00000290390.2	lncRNA	ENSG00000290390	2	NA	chr20	HAVANA	gene	23918529	23928954	-	-2.71159	-4.38547	-3.21671	0.00935678	0.138048	-2.40106
ENSG00000100206.11	protein_coding	DMC1	2	OTTHUMG00000151088.18	chr22	HAVANA	gene	38518948	38570204	-	-1.61321	-1.07351	-3.27327	0.00850698	0.134354	-2.4011
ENSG00000283813.1	miRNA	MIR4485	3	NA	chr11	ENSEMBL	gene	10508270	10508326	-	-2.60239	-3.77461	-3.22401	0.00924233	0.13769	-2.40201
ENSG00000164105.4	protein_coding	SAP30	1	OTTHUMG00000160798.3	chr4	HAVANA	gene	173369969	173377532	+	2.3606	3.63817	3.39528	0.00693382	0.127165	-2.40308
ENSG00000160746.13	protein_coding	ANO10	1	OTTHUMG00000133044.15	chr3	HAVANA	gene	43354859	43691594	-	0.926154	4.81658	3.51497	0.00568121	0.119206	-2.40379
ENSG00000268051.1	lncRNA	ENSG00000268051	2	OTTHUMG00000182399.1	chr19	HAVANA	gene	37963853	37964790	+	-1.83785	-0.406566	-3.30982	0.00800049	0.132735	-2.40471
ENSG00000294192.1	lncRNA	ENSG00000294192	2	NA	chr5	HAVANA	gene	1548415	1558278	+	-4.4934	-0.535267	-3.38717	0.0070284	0.127468	-2.40525
ENSG00000122707.12	protein_coding	RECK	2	OTTHUMG00000019898.2	chr9	HAVANA	gene	36036913	36124455	+	2.13604	4.57353	3.44268	0.00640672	0.123101	-2.40615
ENSG00000302994.1	lncRNA	ENSG00000302994	2	NA	chr6	HAVANA	gene	32689522	32690354	-	-2.49103	-4.43401	-3.2105	0.0094553	0.138426	-2.40778
ENSG00000208036.1	miRNA	MIR106B	3	NA	chr7	ENSEMBL	gene	100093993	100094074	-	-2.49103	-4.43401	-3.2105	0.0094553	0.138426	-2.40778
ENSG00000299042.1	lncRNA	ENSG00000299042	2	NA	chr5	HAVANA	gene	173964173	173965566	+	-3.0897	-3.1444	-3.22968	0.00915448	0.13737	-2.40882
ENSG00000307289.1	lncRNA	ENSG00000307289	2	NA	chr6	HAVANA	gene	3069027	3070065	+	-1.97504	-0.0266403	-3.33159	0.00771363	0.1316	-2.40931
ENSG00000260792.1	lncRNA	LINC02280	2	OTTHUMG00000173007.1	chr14	HAVANA	gene	104661120	104665558	-	-1.5574	-1.27374	-3.26953	0.00856072	0.13493	-2.40998
ENSG00000290917.2	lncRNA	RAET1K	2	NA	chr6	HAVANA	gene	149998019	150005240	-	-2.45033	-3.71802	-3.2179	0.00933803	0.138048	-2.41008
ENSG00000171873.8	protein_coding	ADRA1D	2	OTTHUMG00000031779.5	chr20	HAVANA	gene	4220630	4249287	-	3.60032	-1.76654	3.20581	0.00953031	0.138707	-2.41072
ENSG00000035862.13	protein_coding	TIMP2	2	OTTHUMG00000154517.4	chr17	HAVANA	gene	78852977	78925387	-	2.15875	8.41824	3.62079	0.00476949	0.11249	-2.41187
ENSG00000271781.1	lncRNA	ENSG00000271781	2	OTTHUMG00000185406.1	chr5	HAVANA	gene	675826	676616	+	-2.28643	-0.779063	-3.30477	0.00806861	0.132735	-2.41197
ENSG00000287009.1	lncRNA	ENSG00000287009	2	OTTHUMG00000193938.1	chr10	HAVANA	gene	96129055	96130528	-	-2.57385	-4.09896	-3.20749	0.00950342	0.138707	-2.41309
ENSG00000204389.10	protein_coding	HSPA1A	2	OTTHUMG00000031201.4	chr6	HAVANA	gene	31815543	31817946	+	3.04526	7.65505	3.56565	0.00522384	0.115062	-2.41434
ENSG00000299412.1	lncRNA	ENSG00000299412	2	NA	chr17	HAVANA	gene	16866744	16878603	+	-2.80226	-3.92126	-3.21325	0.00941156	0.138281	-2.4156
ENSG00000236499.4	lncRNA	LINC00896	2	OTTHUMG00000186112.1	chr22	HAVANA	gene	20206340	20235981	+	-1.73888	-1.45088	-3.26573	0.00861561	0.135004	-2.41844
ENSG00000307567.1	lncRNA	ENSG00000307567	2	NA	chr4	HAVANA	gene	123412119	123424239	+	3.00235	-1.75592	3.19939	0.00963413	0.1391	-2.41856
ENSG00000128602.11	protein_coding	SMO	2	OTTHUMG00000158421.4	chr7	HAVANA	gene	129188633	129213545	+	1.66061	2.58306	3.34535	0.00753775	0.130847	-2.42032
ENSG00000161999.13	protein_coding	JMJD8	2	OTTHUMG00000172950.4	chr16	HAVANA	gene	681670	684528	-	1.10471	4.6967	3.49332	0.00588911	0.120006	-2.42092
ENSG00000215784.6	protein_coding	FAM72D	2	OTTHUMG00000074801.5	chr1	HAVANA	gene	145095974	145112696	+	-3.17264	-2.7334	-3.23588	0.0090594	0.137044	-2.42107
ENSG00000206969.1	snRNA	RNU6-1316P	3	NA	chr14	ENSEMBL	gene	102865856	102865963	+	-2.27275	-1.9712	-3.24288	0.0089533	0.136668	-2.42222
ENSG00000300100.1	lncRNA	ENSG00000300100	2	NA	chr19	HAVANA	gene	54208609	54209241	+	-2.57965	-1.14851	-3.26411	0.00863906	0.135063	-2.42325
ENSG00000147202.19	protein_coding	DIAPH2	2	OTTHUMG00000022689.3	chrX	HAVANA	gene	96684712	97604997	+	1.41144	6.51005	3.56272	0.00524928	0.115062	-2.42356
ENSG00000211801.3	TR_V_gene	TRAV21	2	OTTHUMG00000170648.2	chr14	HAVANA	gene	22052514	22053056	+	-2.9145	-3.10696	-3.21919	0.0093177	0.138048	-2.42595
ENSG00000289884.2	lncRNA	ENSG00000289884	2	NA	chr3	HAVANA	gene	164450674	164687874	+	4.64687	-1.72682	3.19407	0.009721	0.139295	-2.42611
ENSG00000241061.3	processed_pseudogene	RPL5P1	1	OTTHUMG00000157866.1	chr15	HAVANA	gene	24908932	24909825	-	1.63072	-0.275634	3.22888	0.00916688	0.13737	-2.42675
ENSG00000261094.3	lncRNA	ENSG00000261094	2	OTTHUMG00000175504.3	chr9	HAVANA	gene	122931613	122940333	+	-1.06994	1.56835	-3.37242	0.00720385	0.129185	-2.4277
ENSG00000265871.1	miRNA	MIR3174	3	NA	chr15	ENSEMBL	gene	90006755	90006841	+	-1.72115	-0.501938	-3.28743	0.00830692	0.134089	-2.42805
ENSG00000221739.1	miRNA	MIR1203	3	NA	chr17	ENSEMBL	gene	48156427	48156511	-	-2.87155	-3.0707	-3.22045	0.009298	0.138048	-2.43008
ENSG00000095917.15	protein_coding	TPSD1	1	OTTHUMG00000128511.5	chr16	HAVANA	gene	1256059	1259008	+	4.95823	-1.49224	3.19157	0.00976208	0.139554	-2.43037
ENSG00000300129.1	lncRNA	ENSG00000300129	2	NA	chr15	HAVANA	gene	91946669	91947493	-	-2.39414	-4.45465	-3.19434	0.0097166	0.139295	-2.43072
ENSG00000219274.1	processed_pseudogene	RPS20P2	1	OTTHUMG00000047844.1	chr16	HAVANA	gene	1329078	1329777	+	-2.39414	-4.45465	-3.19434	0.0097166	0.139295	-2.43072
ENSG00000290023.2	lncRNA	ENSG00000290023	2	NA	chr2	HAVANA	gene	9004043	9046227	+	-2.42467	-2.45136	-3.23666	0.00904751	0.137044	-2.43194
ENSG00000227055.1	processed_pseudogene	ENSG00000227055	1	OTTHUMG00000154179.1	chr2	HAVANA	gene	159812234	159814009	-	-2.41666	-2.10931	-3.24741	0.00888525	0.136393	-2.43415
ENSG00000295871.1	lncRNA	ENSG00000295871	2	NA	chr13	HAVANA	gene	50123326	50124196	-	-1.39803	3.02893	-3.46576	0.00616522	0.1213	-2.43458
ENSG00000263531.1	lncRNA	ENSG00000263531	2	OTTHUMG00000179024.1	chr17	HAVANA	gene	30863921	30864940	-	-1.93286	-2.45821	-3.22265	0.00926358	0.137834	-2.43596
ENSG00000260737.6	lncRNA	LINC01227	2	OTTHUMG00000176267.17	chr16	HAVANA	gene	80553256	80572808	-	-2.57937	-3.64368	-3.19836	0.00965088	0.139161	-2.43785
ENSG00000151474.23	protein_coding	FRMD4A	1	OTTHUMG00000017708.10	chr10	HAVANA	gene	13643706	14462142	-	2.03345	6.18127	3.53463	0.00549912	0.11756	-2.43854
ENSG00000166147.16	protein_coding	FBN1	1	OTTHUMG00000172218.3	chr15	HAVANA	gene	48408313	48645721	-	4.85691	8.65711	3.53878	0.00546142	0.116918	-2.43953
ENSG00000286380.4	lncRNA	ENSG00000286380	2	OTTHUMG00000194371.1	chr7	HAVANA	gene	129763059	129781906	-	-2.71675	-2.14828	-3.24138	0.00897587	0.136668	-2.43969
ENSG00000141424.13	protein_coding	SLC39A6	1	OTTHUMG00000178965.4	chr18	HAVANA	gene	36108531	36129385	-	0.923049	5.29765	3.51659	0.00566603	0.119171	-2.44176
ENSG00000270504.2	lncRNA	ENSG00000270504	2	OTTHUMG00000185108.1	chr6	HAVANA	gene	3751111	3753907	+	1.79775	1.77659	3.29162	0.00824863	0.13386	-2.44253
ENSG00000169607.13	protein_coding	CKAP2L	2	OTTHUMG00000131313.3	chr2	HAVANA	gene	112736349	112764664	-	-3.75465	0.371927	-3.36274	0.00732149	0.129464	-2.44274
ENSG00000202310.1	misc_RNA	Y_RNA	3	NA	chr8	ENSEMBL	gene	100158868	100158975	+	-2.6929	-3.1855	-3.20294	0.00957658	0.138767	-2.44392
ENSG00000234132.3	lncRNA	ENSG00000234132	2	OTTHUMG00000035786.3	chr1	HAVANA	gene	201023869	201043073	+	-2.64931	-2.95023	-3.21081	0.00945036	0.138426	-2.44639
ENSG00000290093.1	lncRNA	ENSG00000290093	2	NA	chr2	HAVANA	gene	219177068	219177530	+	-1.83093	-2.60221	-3.20346	0.00956811	0.138767	-2.44649
ENSG00000126062.4	protein_coding	TMEM115	2	OTTHUMG00000044212.4	chr3	HAVANA	gene	50354750	50359521	-	0.934389	4.53859	3.4702	0.00611985	0.120955	-2.44866
ENSG00000132554.21	protein_coding	RGS22	1	OTTHUMG00000164802.7	chr8	HAVANA	gene	99960936	100131268	-	2.75752	0.737301	3.2282	0.00917741	0.13737	-2.4494
ENSG00000259066.5	protein_coding	ENSG00000259066	2	OTTHUMG00000171266.2	chr14	HAVANA	gene	93184973	93218586	+	-2.90457	-2.61332	-3.20599	0.0095275	0.138707	-2.45063
ENSG00000130675.15	protein_coding	MNX1	1	OTTHUMG00000157181.5	chr7	HAVANA	gene	156994051	157010663	-	-3.19608	-2.37907	-3.22978	0.00915301	0.13737	-2.45088
ENSG00000288900.2	lncRNA	ENSG00000288900	2	NA	chr2	HAVANA	gene	191673767	191677869	-	-2.9916	-1.38909	-3.25396	0.00878789	0.135752	-2.45093
ENSG00000290947.1	lncRNA	ENSG00000290947	2	NA	chr15	HAVANA	gene	82464708	82477258	+	3.79341	-0.767834	3.18331	0.00989916	0.140363	-2.45111
ENSG00000211725.3	TR_V_gene	TRBV5-5	2	OTTHUMG00000158512.4	chr7	HAVANA	gene	142482548	142483019	+	-2.34864	-3.69222	-3.18583	0.00985713	0.140122	-2.45236
ENSG00000294647.1	lncRNA	ENSG00000294647	2	NA	chr19	HAVANA	gene	19358549	19385913	-	-2.17153	-2.85535	-3.20193	0.00959294	0.138835	-2.45293
ENSG00000303906.1	lncRNA	ENSG00000303906	2	NA	chr1	HAVANA	gene	181094425	181105492	-	-1.67642	-1.43647	-3.24659	0.00889755	0.136441	-2.45375
ENSG00000143452.16	protein_coding	HORMAD1	2	OTTHUMG00000035005.3	chr1	HAVANA	gene	150698060	150720895	-	-1.92981	-0.500218	-3.2619	0.00867115	0.135291	-2.45391
ENSG00000177119.17	protein_coding	ANO6	2	OTTHUMG00000169564.2	chr12	HAVANA	gene	45215987	45482280	+	1.36593	7.39808	3.56917	0.00519353	0.115062	-2.45422
ENSG00000120129.6	protein_coding	DUSP1	2	OTTHUMG00000130523.4	chr5	HAVANA	gene	172768096	172771195	-	2.79855	8.071	3.56785	0.00520492	0.115062	-2.4543
ENSG00000235174.1	processed_pseudogene	RPL39P3	2	OTTHUMG00000015023.2	chr6	HAVANA	gene	73373108	73373263	-	-1.96549	-1.4698	-3.23562	0.00906343	0.137044	-2.45436
ENSG00000157131.12	protein_coding	C8A	2	OTTHUMG00000008306.2	chr1	HAVANA	gene	56854768	56918223	+	3.89299	-1.97094	3.17319	0.0100696	0.140965	-2.45485
ENSG00000198901.14	protein_coding	PRC1	1	OTTHUMG00000171685.8	chr15	HAVANA	gene	90966040	90995629	-	-1.91743	-0.646411	-3.2657	0.00861598	0.135004	-2.45649
ENSG00000183615.6	protein_coding	FAM167B	2	OTTHUMG00000007462.3	chr1	HAVANA	gene	32247222	32248856	+	2.46441	0.841892	3.23195	0.00911952	0.137281	-2.45744
ENSG00000183856.11	protein_coding	IQGAP3	2	OTTHUMG00000033114.4	chr1	HAVANA	gene	156525405	156572604	-	-3.61312	2.39881	-3.46264	0.00619731	0.121303	-2.45766
ENSG00000166394.15	protein_coding	CYB5R2	1	OTTHUMG00000165665.3	chr11	HAVANA	gene	7665100	7677222	-	2.20521	1.44454	3.26747	0.00859041	0.135002	-2.45777
ENSG00000274460.2	lncRNA	ENSG00000274460	2	OTTHUMG00000186800.1	chr16	HAVANA	gene	21950218	21953014	-	-1.52846	0.874818	-3.32676	0.00777638	0.1316	-2.45784
ENSG00000150687.12	protein_coding	PRSS23	2	OTTHUMG00000167226.4	chr11	HAVANA	gene	86791059	86952910	+	2.22767	5.96649	3.50634	0.00576315	0.119663	-2.45893
ENSG00000307124.1	lncRNA	ENSG00000307124	2	NA	chr17	HAVANA	gene	78337666	78339347	+	-2.92985	-2.933	-3.2028	0.00957886	0.138767	-2.45912
ENSG00000298968.1	lncRNA	ENSG00000298968	2	NA	chr12	HAVANA	gene	51866615	51870723	-	-3.4748	-1.02742	-3.30596	0.00805241	0.132735	-2.45961
ENSG00000261904.1	unprocessed_pseudogene	MTND5P33	2	OTTHUMG00000177346.1	chr16	HAVANA	gene	10720015	10721464	-	-2.69925	-3.45802	-3.19267	0.00974399	0.139427	-2.46091
ENSG00000149575.9	protein_coding	SCN2B	2	NA	chr11	HAVANA	gene	118162806	118176639	-	3.49207	-0.63294	3.17368	0.0100613	0.140914	-2.46129
ENSG00000105137.13	protein_coding	SYDE1	2	OTTHUMG00000183207.4	chr19	HAVANA	gene	15107401	15114985	+	2.68442	4.11915	3.37189	0.00721025	0.129204	-2.46414
ENSG00000305780.1	lncRNA	ENSG00000305780	2	NA	chr1	HAVANA	gene	228122588	228136519	-	-2.47188	-3.54977	-3.18254	0.00991202	0.140425	-2.46421
ENSG00000259358.1	processed_pseudogene	DEPDC1P1	1	OTTHUMG00000172235.1	chr15	HAVANA	gene	31765743	31768201	-	2.39736	-1.15187	3.17847	0.00998031	0.140496	-2.46506
ENSG00000280441.4	lncRNA	ENSG00000280441	2	OTTHUMG00000189419.3	chr21	HAVANA	gene	8380643	8454792	+	-2.11647	-2.78645	-3.19643	0.00968239	0.139201	-2.46582
ENSG00000289077.2	lncRNA	ENSG00000289077	2	NA	chr2	HAVANA	gene	100818200	100847220	+	2.07704	1.01245	3.23757	0.00903367	0.137007	-2.46604
ENSG00000282320.1	TR_J_gene	TRBJ1-1	2	OTTHUMG00000190603.3	chr7	HAVANA	gene	142786880	142786927	+	-2.60989	-3.57063	-3.17976	0.00995868	0.140496	-2.46672
ENSG00000142552.8	protein_coding	RCN3	1	OTTHUMG00000183154.3	chr19	HAVANA	gene	49528003	49546962	+	2.70201	4.4598	3.3879	0.00701986	0.127389	-2.46689
ENSG00000309351.1	lncRNA	ENSG00000309351	2	NA	chr11	HAVANA	gene	58575939	58578949	-	-1.86051	-0.832879	-3.24675	0.00889511	0.136441	-2.46728
ENSG00000289359.2	lncRNA	ENSG00000289359	2	NA	chr6	HAVANA	gene	149140119	149161931	+	-2.23359	-2.70081	-3.198	0.00965672	0.139161	-2.46909
ENSG00000084636.18	protein_coding	COL16A1	2	OTTHUMG00000003883.24	chr1	HAVANA	gene	31652263	31704319	-	3.36848	6.76191	3.49921	0.00583176	0.120006	-2.46919
ENSG00000301574.1	lncRNA	ENSG00000301574	2	NA	chr1	HAVANA	gene	203290689	203291381	+	-3.40753	-3.5266	-3.1823	0.00991592	0.140425	-2.46926
ENSG00000111445.14	protein_coding	RFC5	2	OTTHUMG00000156438.5	chr12	HAVANA	gene	118013588	118033130	+	-0.979156	3.23552	-3.44949	0.00633446	0.122254	-2.47114
ENSG00000185480.12	protein_coding	PARPBP	1	OTTHUMG00000167923.3	chr12	HAVANA	gene	102120183	102197520	+	-2.01671	1.75286	-3.39002	0.00699508	0.127383	-2.47145
ENSG00000289515.3	lncRNA	ENSG00000289515	2	NA	chr4	HAVANA	gene	76305874	76306595	-	3.1379	-1.1476	3.16593	0.0101939	0.141793	-2.47157
ENSG00000289246.3	lncRNA	ENSG00000289246	2	NA	chr19	HAVANA	gene	35432823	35438035	+	-2.64709	-4.16771	-3.16834	0.0101526	0.141793	-2.47184
ENSG00000259462.3	lncRNA	CPEB1-AS1	2	OTTHUMG00000172386.3	chr15	HAVANA	gene	82647770	82692820	+	3.58894	-1.38794	3.16313	0.0102423	0.141793	-2.47317
ENSG00000266709.1	lncRNA	ENSG00000266709	2	OTTHUMG00000178358.1	chr17	HAVANA	gene	14303854	14305505	+	-3.78061	-0.0782567	-3.32618	0.00778387	0.1316	-2.47318
ENSG00000299004.1	lncRNA	ENSG00000299004	2	NA	chr1	HAVANA	gene	7960536	7961526	-	-2.82481	-3.40698	-3.18029	0.00994968	0.140496	-2.47534
ENSG00000289554.1	lncRNA	ENSG00000289554	2	NA	chr1	HAVANA	gene	26881109	26882235	-	-1.3312	0.525199	-3.28888	0.00828677	0.133991	-2.47611
ENSG00000127074.15	protein_coding	RGS13	2	OTTHUMG00000035601.1	chr1	HAVANA	gene	192636138	192660311	+	-3.4393	-0.936444	-3.27677	0.0084571	0.134311	-2.47615
ENSG00000134323.13	protein_coding	MYCN	2	OTTHUMG00000039579.4	chr2	HAVANA	gene	15940550	15947007	+	-1.78333	-1.48767	-3.21291	0.00941696	0.138281	-2.47692
ENSG00000157827.20	protein_coding	FMNL2	1	OTTHUMG00000154035.7	chr2	HAVANA	gene	152335174	152649826	+	0.781407	6.77068	3.5492	0.00536796	0.115919	-2.47811
ENSG00000285725.2	lncRNA	ENSG00000285725	2	OTTHUMG00000193353.1	chr7	HAVANA	gene	97966083	97973344	-	-1.03828	2.93324	-3.43431	0.00649668	0.12389	-2.47848
ENSG00000269067.2	protein_coding	ZNF728	1	OTTHUMG00000183124.3	chr19	HAVANA	gene	22974883	23003176	-	4.67394	-0.197693	3.1633	0.0102394	0.141793	-2.48018
ENSG00000253348.2	lncRNA	ENSG00000253348	1	OTTHUMG00000163164.2	chr5	HAVANA	gene	170744869	170788724	-	2.27083	-1.61465	3.16064	0.0102854	0.141839	-2.48143
ENSG00000303057.1	lncRNA	ENSG00000303057	2	NA	chr12	HAVANA	gene	53379207	53379465	-	-2.15399	-3.72633	-3.16411	0.0102253	0.141793	-2.48212
ENSG00000197766.9	protein_coding	CFD	2	OTTHUMG00000181840.6	chr19	HAVANA	gene	859453	867884	+	4.46746	5.53901	3.35747	0.00738642	0.129702	-2.48292
ENSG00000187824.9	protein_coding	TMEM220	1	OTTHUMG00000178043.4	chr17	HAVANA	gene	10699015	10730023	-	2.24034	2.34123	3.26869	0.00857275	0.13493	-2.48296
ENSG00000260369.2	lncRNA	ENSG00000260369	2	OTTHUMG00000176094.2	chr17	HAVANA	gene	80453735	80454729	-	-2.40862	-3.03685	-3.17716	0.0100023	0.140542	-2.48355
ENSG00000287420.2	lncRNA	ENSG00000287420	2	OTTHUMG00000193996.1	chr10	HAVANA	gene	30529407	30554628	+	-2.4975	-2.28083	-3.20233	0.00958638	0.138806	-2.48421
ENSG00000294950.1	lncRNA	ENSG00000294950	2	NA	chr2	HAVANA	gene	26032399	26033810	-	-2.48175	-3.70333	-3.16398	0.0102275	0.141793	-2.48444
ENSG00000304661.1	lncRNA	ENSG00000304661	2	NA	chr17	HAVANA	gene	43315145	43318133	+	-3.23317	-0.707326	-3.2509	0.00883315	0.135865	-2.48461
ENSG00000167526.15	protein_coding	RPL13	1	OTTHUMG00000133770.8	chr16	HAVANA	gene	89560677	89567834	+	0.865771	8.98334	3.60171	0.0049219	0.113665	-2.48527
ENSG00000253535.6	lncRNA	ADAM7-AS1	2	OTTHUMG00000163790.3	chr8	HAVANA	gene	24169001	24912073	-	-3.61326	-0.509061	-3.30304	0.00809204	0.132735	-2.48551
ENSG00000196968.11	protein_coding	FUT11	2	OTTHUMG00000018483.3	chr10	HAVANA	gene	73772276	73780251	+	1.19609	5.30932	3.48436	0.00597745	0.120376	-2.48683
ENSG00000121933.19	protein_coding	TMIGD3	1	OTTHUMG00000190810.2	chr1	HAVANA	gene	111483348	111563962	-	3.73648	2.27883	3.23104	0.00913355	0.137344	-2.48762
ENSG00000272716.3	lncRNA	SLC30A6-DT	2	OTTHUMG00000185842.1	chr2	HAVANA	gene	32165035	32165760	-	-2.23294	-2.65011	-3.17868	0.00997675	0.140496	-2.4882
ENSG00000180447.7	protein_coding	GAS1	2	OTTHUMG00000020141.2	chr9	HAVANA	gene	86944362	86947506	-	4.16009	3.83392	3.26578	0.00861482	0.135004	-2.48857
ENSG00000223653.7	lncRNA	BCL10-AS1	2	OTTHUMG00000010579.2	chr1	HAVANA	gene	85276388	85448124	+	-2.02811	0.39665	-3.29549	0.00819522	0.133528	-2.48918
ENSG00000310091.1	lncRNA	ENSG00000310091	2	NA	chr15	HAVANA	gene	48984781	48987278	-	-2.82721	-4.08807	-3.1605	0.0102879	0.141839	-2.48922
ENSG00000254665.1	lncRNA	ENSG00000254665	2	OTTHUMG00000165842.1	chr11	HAVANA	gene	8693357	8696607	+	-3.32738	-2.47538	-3.18971	0.00979275	0.139729	-2.48937
ENSG00000300695.1	lncRNA	ENSG00000300695	2	NA	chr5	HAVANA	gene	42951460	42953724	+	-2.18126	-0.453467	-3.26154	0.00867644	0.135304	-2.48973
ENSG00000102125.17	protein_coding	TAFAZZIN	2	OTTHUMG00000033190.38	chrX	HAVANA	gene	154411524	154421726	+	0.816707	5.03035	3.47852	0.00603572	0.120376	-2.49023
ENSG00000274383.1	lncRNA	ENSG00000274383	2	OTTHUMG00000188435.1	chr15	HAVANA	gene	64950916	64951435	-	-2.94009	-1.6719	-3.22509	0.00922562	0.137515	-2.49051
ENSG00000271646.2	lncRNA	IRF2-DT	2	OTTHUMG00000185264.1	chr4	HAVANA	gene	184474666	184502681	+	-1.46274	1.2719	-3.32099	0.00785194	0.1316	-2.49216
ENSG00000089692.9	protein_coding	LAG3	2	OTTHUMG00000169197.2	chr12	HAVANA	gene	6772512	6778455	+	-2.98328	0.434326	-3.31611	0.00791646	0.132135	-2.4926
ENSG00000310074.1	lncRNA	ENSG00000310074	2	NA	chr7	HAVANA	gene	152101009	152131865	-	-1.86973	0.278893	-3.27505	0.00848156	0.134311	-2.49274
ENSG00000307734.1	lncRNA	ENSG00000307734	2	NA	chr1	HAVANA	gene	40039519	40040483	-	-2.43953	-2.5825	-3.18382	0.00989057	0.140363	-2.49291
ENSG00000224903.2	lncRNA	RNF32-AS1	2	OTTHUMG00000151509.2	chr7	HAVANA	gene	156654185	156659582	-	-2.68646	0.303415	-3.3085	0.00801826	0.132735	-2.49439
ENSG00000215912.13	protein_coding	TTC34	2	OTTHUMG00000000539.10	chr1	HAVANA	gene	2636986	2801693	-	-2.62012	-0.0563215	-3.2942	0.00821298	0.133528	-2.49441
ENSG00000101447.15	protein_coding	FAM83D	2	OTTHUMG00000032462.4	chr20	HAVANA	gene	38926312	38953106	+	-2.62619	0.465344	-3.33061	0.00772631	0.1316	-2.49486
ENSG00000275126.2	protein_coding	H4C13	2	OTTHUMG00000016211.2	chr6	HAVANA	gene	27873148	27873534	-	-3.34339	-1.13958	-3.25102	0.00883143	0.135865	-2.4953
ENSG00000272509.1	lncRNA	ENSG00000272509	2	OTTHUMG00000185506.1	chr8	HAVANA	gene	94884609	94885070	+	-1.92764	-2.23154	-3.179	0.00997146	0.140496	-2.49534
ENSG00000222790.1	snRNA	RNU4-14P	3	NA	chr5	ENSEMBL	gene	140397323	140397444	-	-2.22075	-4.29616	-3.15043	0.0104645	0.142326	-2.49548
ENSG00000212123.4	protein_coding	PRR22	2	OTTHUMG00000180553.2	chr19	HAVANA	gene	5782960	5784746	-	-1.76533	-1.16922	-3.21014	0.009461	0.138442	-2.49566
ENSG00000288898.2	lncRNA	ENSG00000288898	2	NA	chr2	HAVANA	gene	218908822	218943574	+	-3.251	-3.19994	-3.18396	0.0098882	0.140363	-2.49573
ENSG00000287895.1	lncRNA	ENSG00000287895	2	OTTHUMG00000194786.1	chr1	HAVANA	gene	228119149	228121312	-	-2.84864	-2.68658	-3.18145	0.00993018	0.140496	-2.4975
ENSG00000174500.13	protein_coding	GCSAM	1	OTTHUMG00000159231.5	chr3	HAVANA	gene	112120839	112133270	-	-3.6665	-0.522326	-3.29892	0.00814818	0.132935	-2.49871
ENSG00000267649.2	lncRNA	ENSG00000267649	2	OTTHUMG00000180702.1	chr19	HAVANA	gene	55216587	55221659	+	-1.75467	-2.71798	-3.17145	0.0100994	0.141252	-2.49949
ENSG00000258789.1	lncRNA	ENSG00000258789	2	OTTHUMG00000170802.1	chr14	HAVANA	gene	88551597	88552493	+	2.38697	-2.35002	3.14255	0.0106048	0.142735	-2.49987
ENSG00000137809.17	protein_coding	ITGA11	2	OTTHUMG00000172657.4	chr15	HAVANA	gene	68296532	68432163	-	4.56812	5.12271	3.32395	0.00781302	0.1316	-2.50016
ENSG00000305986.1	lncRNA	ENSG00000305986	2	NA	chr1	HAVANA	gene	221047082	221084202	+	-3.62784	-2.78685	-3.19601	0.00968915	0.139232	-2.50166
ENSG00000167513.9	protein_coding	CDT1	2	OTTHUMG00000173467.3	chr16	HAVANA	gene	88803789	88809258	+	-3.36327	-0.0945971	-3.31114	0.00798282	0.132688	-2.50345
ENSG00000260386.7	transcribed_unitary_pseudogene	LDC1P	2	OTTHUMG00000174814.3	chr1	HAVANA	gene	31501399	31509648	+	-2.58258	-4.06152	-3.14993	0.0104733	0.142326	-2.50349
ENSG00000258565.1	unprocessed_pseudogene	BLZF2P	1	OTTHUMG00000171760.1	chr14	HAVANA	gene	68867857	68869951	-	-2.91632	-1.95822	-3.19688	0.00967493	0.139201	-2.50352
ENSG00000229832.1	lncRNA	ENSG00000229832	2	OTTHUMG00000036745.1	chr1	HAVANA	gene	212357418	212358353	+	1.7124	0.586648	3.20627	0.00952297	0.138707	-2.50486
ENSG00000265559.2	misc_RNA	RN7SL652P	3	NA	chr11	ENSEMBL	gene	47557534	47557833	-	-1.58876	-1.8246	-3.18077	0.00994168	0.140496	-2.50756
ENSG00000288032.1	lncRNA	ENSG00000288032	2	OTTHUMG00000195853.1	chr3	HAVANA	gene	155886615	155890729	+	-1.54073	0.526758	-3.28003	0.0084109	0.134265	-2.50771
ENSG00000297204.1	lncRNA	ENSG00000297204	2	NA	chr5	HAVANA	gene	56814384	56815447	-	-2.44163	-2.52257	-3.18068	0.00994307	0.140496	-2.50842
ENSG00000255946.4	lncRNA	ENSG00000255946	2	OTTHUMG00000169204.1	chr12	HAVANA	gene	120729949	120761694	-	-2.17291	-0.0566048	-3.24052	0.00898889	0.136668	-2.50933
ENSG00000225096.4	lncRNA	ENSG00000225096	2	OTTHUMG00000014930.14	chr6	HAVANA	gene	57961438	58438364	+	3.43625	0.180662	3.16119	0.010276	0.141839	-2.50934
ENSG00000165424.7	protein_coding	ZCCHC24	2	OTTHUMG00000018561.2	chr10	HAVANA	gene	79382325	79445624	-	1.92843	5.88273	3.4605	0.00621934	0.121577	-2.51041
ENSG00000296802.1	lncRNA	ENSG00000296802	2	NA	chr7	HAVANA	gene	65041591	65083936	-	-1.37277	0.631256	-3.2826	0.00837468	0.134259	-2.51217
ENSG00000204403.11	protein_coding	CASP12	1	OTTHUMG00000154965.6	chr11	HAVANA	gene	104885718	104898670	-	4.08245	0.572555	3.15521	0.0103802	0.141935	-2.51231
ENSG00000305025.1	lncRNA	ENSG00000305025	2	NA	chr2	HAVANA	gene	197434598	197436224	+	-2.11747	-1.4681	-3.19107	0.00977032	0.139606	-2.51261
ENSG00000183621.15	protein_coding	ZNF438	2	OTTHUMG00000017904.4	chr10	HAVANA	gene	30820207	31031937	-	1.23427	4.59375	3.4185	0.00667024	0.125311	-2.51278
ENSG00000221091.1	miRNA	MIR1302-5	3	NA	chr20	ENSEMBL	gene	50614636	50614785	-	2.90805	-2.7828	3.13104	0.0108132	0.144009	-2.51412
ENSG00000211676.2	IG_J_gene	IGLJ2	2	OTTHUMG00000151243.2	chr22	HAVANA	gene	22899481	22899655	+	-3.13186	-3.07118	-3.16784	0.0101611	0.141793	-2.51416
ENSG00000266038.1	miRNA	MIR4659A	3	NA	chr8	ENSEMBL	gene	6745164	6745244	+	-2.30542	-2.49876	-3.16491	0.0102115	0.141793	-2.51551
ENSG00000164125.16	protein_coding	GASK1B	1	OTTHUMG00000161537.4	chr4	HAVANA	gene	158124474	158173318	-	2.04693	5.89354	3.47024	0.00611936	0.120955	-2.51646
ENSG00000266844.2	lncRNA	ENSG00000266844	2	OTTHUMG00000179333.1	chr18	HAVANA	gene	76974690	76984162	+	-2.51565	-1.66503	-3.18979	0.00979146	0.139729	-2.51668
ENSG00000290121.2	lncRNA	ENSG00000290121	2	NA	chr1	HAVANA	gene	144545892	144546889	-	-2.34713	-3.017	-3.15243	0.0104291	0.142198	-2.51673
ENSG00000228049.8	protein_coding	POLR2J2	2	OTTHUMG00000150388.6	chr7	HAVANA	gene	102665368	102671663	-	-1.10187	2.57387	-3.37877	0.00712775	0.128503	-2.51833
ENSG00000273156.2	lncRNA	ENSG00000273156	2	OTTHUMG00000186308.3	chr4	HAVANA	gene	82344876	82346842	-	-2.16312	0.243141	-3.25506	0.00877157	0.135744	-2.51867
ENSG00000302894.1	lncRNA	ENSG00000302894	2	NA	chr11	HAVANA	gene	114217019	114218580	+	5.29708	2.29156	3.16596	0.0101934	0.141793	-2.51899
ENSG00000259288.7	protein_coding	BUB1B-PAK6	2	OTTHUMG00000172398.2	chr15	HAVANA	gene	40218500	40264890	+	-2.2557	-3.86677	-3.13979	0.0106544	0.142833	-2.51984
ENSG00000200953.1	misc_RNA	Y_RNA	3	NA	chr12	ENSEMBL	gene	51156868	51156977	-	-1.39296	-0.115421	-3.23642	0.00905114	0.137044	-2.5199
ENSG00000175155.11	protein_coding	YPEL2	2	OTTHUMG00000179378.3	chr17	HAVANA	gene	59331655	59401729	+	1.27999	6.54144	3.50746	0.0057525	0.119565	-2.52129
ENSG00000310506.1	lncRNA	ENSG00000310506	2	NA	chr1	HAVANA	gene	234862023	234863250	-	-3.25973	-2.25699	-3.18454	0.00987861	0.140361	-2.52166
ENSG00000156802.13	protein_coding	ATAD2	1	OTTHUMG00000165090.4	chr8	HAVANA	gene	123319850	123416350	-	-1.05652	5.21633	-3.51125	0.00571639	0.119565	-2.52387
ENSG00000104951.16	protein_coding	IL4I1	2	OTTHUMG00000183377.3	chr19	HAVANA	gene	49889654	49929539	-	-2.78376	1.60282	-3.37163	0.00721345	0.129204	-2.52395
ENSG00000236256.10	lncRNA	DIAPH2-AS1	2	OTTHUMG00000021989.3	chrX	HAVANA	gene	97431286	97642589	-	-3.50724	-2.73001	-3.18315	0.0099018	0.140363	-2.52467
ENSG00000214797.3	lncRNA	ENSG00000214797	2	OTTHUMG00000167437.1	chr11	HAVANA	gene	59268876	59284033	-	-3.46728	-2.30978	-3.19703	0.0096726	0.139201	-2.52537
ENSG00000241048.2	lncRNA	ENSG00000241048	2	OTTHUMG00000159738.1	chr3	HAVANA	gene	150127047	150226373	-	-3.95274	-2.50923	-3.19651	0.00968096	0.139201	-2.52558
ENSG00000134294.14	protein_coding	SLC38A2	2	OTTHUMG00000169471.2	chr12	HAVANA	gene	46358188	46372773	-	1.07916	8.31564	3.55902	0.00528149	0.115062	-2.52639
ENSG00000305988.1	lncRNA	ENSG00000305988	2	NA	chr3	HAVANA	gene	194571198	194574563	-	-3.50267	-2.95866	-3.16475	0.0102144	0.141793	-2.52728
ENSG00000182836.11	protein_coding	PLCXD3	2	OTTHUMG00000162076.2	chr5	HAVANA	gene	41306952	41510601	-	4.17248	3.50395	3.24172	0.00897079	0.136668	-2.5278
ENSG00000156486.8	protein_coding	KCNS2	2	OTTHUMG00000044337.4	chr8	HAVANA	gene	98426958	98432853	+	4.58442	0.660805	3.14412	0.0105766	0.142545	-2.53016
ENSG00000289860.2	lncRNA	ENSG00000289860	2	NA	chr13	HAVANA	gene	21642569	21671021	-	-2.6396	-3.26663	-3.13918	0.0106655	0.142856	-2.53036
ENSG00000309210.1	lncRNA	ENSG00000309210	2	NA	chr11	HAVANA	gene	117316314	117316549	+	2.64942	-2.94509	3.11898	0.0110362	0.144978	-2.53117
ENSG00000284428.1	lncRNA	ENSG00000284428	2	OTTHUMG00000183235.3	chr19	HAVANA	gene	23259906	23274251	-	-1.17334	2.68883	-3.38607	0.00704132	0.127501	-2.53162
ENSG00000307958.1	lncRNA	ENSG00000307958	2	NA	chr1	HAVANA	gene	2576210	2580567	-	-3.10865	-3.71404	-3.14132	0.010627	0.14278	-2.53209
ENSG00000038427.16	protein_coding	VCAN	2	OTTHUMG00000131321.7	chr5	HAVANA	gene	83471618	83582303	+	2.14484	9.26689	3.5739	0.00515311	0.115062	-2.53285
ENSG00000110002.16	protein_coding	VWA5A	1	OTTHUMG00000165971.3	chr11	HAVANA	gene	124115404	124147721	+	1.26612	4.41375	3.40822	0.00678561	0.12623	-2.53333
ENSG00000207233.1	snoRNA	SNORA37	3	NA	chr18	ENSEMBL	gene	54222284	54222412	-	-1.99605	0.329649	-3.27516	0.00848004	0.134311	-2.53397
ENSG00000293999.1	lncRNA	ENSG00000293999	2	NA	chr19	HAVANA	gene	18304772	18305511	+	-1.82183	-0.0423774	-3.24022	0.00899336	0.136668	-2.53423
ENSG00000172216.7	protein_coding	CEBPB	2	OTTHUMG00000032715.2	chr20	HAVANA	gene	50190734	50192690	+	1.61797	5.89274	3.46281	0.00619554	0.121303	-2.53463
ENSG00000127472.11	protein_coding	PLA2G5	2	OTTHUMG00000002698.4	chr1	HAVANA	gene	20028179	20091911	+	4.58762	1.59471	3.15968	0.0103021	0.141839	-2.53654
ENSG00000300153.1	lncRNA	ENSG00000300153	2	NA	chr7	HAVANA	gene	93793206	93807663	-	-2.74681	-3.65238	-3.13764	0.0106933	0.142976	-2.53704
ENSG00000223750.1	transcribed_unprocessed_pseudogene	SIRPB3P	2	OTTHUMG00000031678.2	chr20	HAVANA	gene	1665283	1708200	-	-3.34405	-3.08934	-3.15953	0.0103048	0.141839	-2.53718
ENSG00000274500.1	misc_RNA	ENSG00000274500	3	NA	chr7	ENSEMBL	gene	130489868	130489966	+	-2.66287	-3.77107	-3.13403	0.0107588	0.143598	-2.53787
ENSG00000005471.19	protein_coding	ABCB4	2	OTTHUMG00000023396.20	chr7	HAVANA	gene	87401696	87480435	-	-2.48527	2.21996	-3.36147	0.00733713	0.129464	-2.53792
ENSG00000276853.1	lncRNA	ENSG00000276853	2	OTTHUMG00000187155.1	chr12	HAVANA	gene	65171262	65171917	+	-1.27026	0.880178	-3.2684	0.00857691	0.13493	-2.53837
ENSG00000139112.11	protein_coding	GABARAPL1	2	OTTHUMG00000168411.10	chr12	HAVANA	gene	10212458	10223128	+	2.33062	7.15475	3.4908	0.00591379	0.120208	-2.53857
ENSG00000100151.16	protein_coding	PICK1	2	OTTHUMG00000151159.4	chr22	HAVANA	gene	38056311	38075701	+	0.980499	4.90134	3.44038	0.00643126	0.123305	-2.53963
ENSG00000287645.2	lncRNA	ENSG00000287645	2	OTTHUMG00000195780.1	chr3	HAVANA	gene	179971490	180111508	+	-2.59191	-3.47608	-3.13827	0.0106818	0.142895	-2.54135
ENSG00000120156.22	protein_coding	TEK	1	OTTHUMG00000019712.6	chr9	HAVANA	gene	27109141	27230174	+	4.01402	4.64628	3.28332	0.00836457	0.134259	-2.54235
ENSG00000294664.1	lncRNA	ENSG00000294664	2	NA	chr6	HAVANA	gene	14094399	14094753	+	-3.21953	-4.26924	-3.12747	0.0108789	0.144314	-2.54328
ENSG00000152760.10	protein_coding	DYNLT5	2	OTTHUMG00000009162.4	chr1	HAVANA	gene	66752459	66779047	+	3.66683	0.03107	3.13069	0.0108197	0.144032	-2.5434
ENSG00000276573.1	lncRNA	ENSG00000276573	2	OTTHUMG00000189062.1	chr13	HAVANA	gene	97435946	97436168	+	-1.96613	-1.33278	-3.17834	0.00998244	0.140496	-2.54399
ENSG00000235408.6	snoRNA	SNORA71B	2	OTTHUMG00000032446.2	chr20	HAVANA	gene	38425083	38425354	-	-2.14543	-0.362817	-3.23324	0.00909975	0.137088	-2.54556
ENSG00000305244.1	lncRNA	ENSG00000305244	2	NA	chr15	HAVANA	gene	84716551	84717543	+	-1.6272	-1.82369	-3.17057	0.0101143	0.141395	-2.5456
ENSG00000225673.3	processed_pseudogene	TMED2P1	1	OTTHUMG00000158655.1	chr3	HAVANA	gene	60730055	60730644	-	-1.54337	-0.391003	-3.20942	0.00947248	0.138481	-2.54586
ENSG00000275719.1	lncRNA	ENSG00000275719	2	OTTHUMG00000186769.1	chr19	HAVANA	gene	46787815	46789043	+	3.69499	-1.46006	3.11281	0.0111522	0.14565	-2.54738
ENSG00000268027.5	lncRNA	ENSG00000268027	2	OTTHUMG00000182624.2	chr19	HAVANA	gene	41545192	41555462	+	-3.51593	0.00662243	-3.27126	0.0085358	0.134632	-2.54799
ENSG00000088881.22	protein_coding	EBF4	2	OTTHUMG00000031709.8	chr20	HAVANA	gene	2692780	2760108	+	2.69341	2.43207	3.23479	0.00907598	0.137044	-2.54937
ENSG00000240891.8	protein_coding	PLCXD2	1	OTTHUMG00000159279.5	chr3	HAVANA	gene	111674676	111846447	+	-2.18722	2.13854	-3.35262	0.00744654	0.130081	-2.55015
ENSG00000166897.16	protein_coding	ELFN2	2	OTTHUMG00000150558.4	chr22	HAVANA	gene	37367960	37427479	-	-3.20573	1.34739	-3.37302	0.00719671	0.129185	-2.55042
ENSG00000258944.1	lncRNA	ENSG00000258944	2	OTTHUMG00000171435.1	chr14	HAVANA	gene	73272182	73274081	-	-2.62493	-1.54709	-3.17532	0.0100336	0.140786	-2.5508
ENSG00000107796.14	protein_coding	ACTA2	2	OTTHUMG00000018700.2	chr10	HAVANA	gene	88934822	88991339	-	5.64553	8.37555	3.44385	0.0063942	0.123094	-2.55161
ENSG00000211841.1	TR_J_gene	TRAJ48	2	OTTHUMG00000170919.3	chr14	HAVANA	gene	22490491	22490553	+	-2.81459	-2.82107	-3.15262	0.0104258	0.142198	-2.55193
ENSG00000305745.1	lncRNA	ENSG00000305745	2	NA	chr2	HAVANA	gene	136239145	136239878	+	-3.79682	-3.56898	-3.1436	0.010586	0.142608	-2.55273
ENSG00000276107.1	lncRNA	THBS1-IT1	2	OTTHUMG00000186812.1	chr15	HAVANA	gene	39586561	39587293	+	5.04285	3.36215	3.21373	0.00940398	0.138281	-2.5543
ENSG00000249655.1	lncRNA	ENSG00000249655	2	OTTHUMG00000162535.1	chr5	HAVANA	gene	80630313	80631590	-	-1.62732	-1.86441	-3.16301	0.0102444	0.141793	-2.55465
ENSG00000271862.1	lncRNA	ENSG00000271862	2	OTTHUMG00000185533.1	chr5	HAVANA	gene	83049376	83050964	-	-1.83992	-0.441617	-3.2171	0.00935058	0.138048	-2.55572
ENSG00000043355.12	protein_coding	ZIC2	2	OTTHUMG00000017279.5	chr13	HAVANA	gene	99981784	99986765	+	-2.817	-2.08942	-3.16619	0.0101894	0.141793	-2.55616
[truncated: 28,379 more rows]
