# Supplementary material
Source: Research Square preprint supplement (doi:10.21203/rs.3.rs-9085811/v1)
Supplement: Supplementary file 3 [file 8535c7019b7376607ccee398.xlsx]

## Sheet: HUCCT1 RMC7977 vs Veh
gene_id	gene_type	gene_name	level	havana_gene	chr	DB	Type	start	end	strand	logFC	AveExpr	t	P.Value	adj.P.Val	B
ENSG00000198959.12	protein_coding	TGM2	2	OTTHUMG00000032437.5	chr20	HAVANA	gene	38127385	38166578	-	-3.69899	10.1787	-124.582	3.04486e-25	4.96404e-21	48.0283
ENSG00000205426.11	protein_coding	KRT81	2	OTTHUMG00000167574.2	chr12	HAVANA	gene	52285913	52291534	-	2.93742	10.5264	117.716	7.50575e-25	6.11831e-21	47.2718
ENSG00000110092.4	protein_coding	CCND1	1	OTTHUMG00000167877.4	chr11	HAVANA	gene	69641156	69654474	+	-4.09792	7.77519	-89.1374	6.26277e-23	3.4034e-19	42.5323
ENSG00000211448.14	protein_coding	DIO2	2	OTTHUMG00000171443.6	chr14	HAVANA	gene	80197526	80387757	-	3.84616	9.06706	85.6679	1.17737e-22	3.61292e-19	42.2523
ENSG00000135480.17	protein_coding	KRT7	1	OTTHUMG00000169580.2	chr12	HAVANA	gene	52232520	52252186	+	1.77232	11.6801	84.8346	1.37532e-22	3.61292e-19	42.1905
ENSG00000137309.21	protein_coding	HMGA1	2	OTTHUMG00000014539.4	chr6	HAVANA	gene	34236873	34246231	+	-2.44496	9.77376	-84.1947	1.55128e-22	3.61292e-19	42.084
ENSG00000175592.9	protein_coding	FOSL1	1	OTTHUMG00000166715.5	chr11	HAVANA	gene	65892049	65900573	-	-4.19006	7.21242	-84.3405	1.50916e-22	3.61292e-19	41.5006
ENSG00000103888.17	protein_coding	CEMIP	2	OTTHUMG00000144184.5	chr15	HAVANA	gene	80779343	80951776	+	4.84766	7.54917	80.2022	3.35796e-22	6.84309e-19	40.7568
ENSG00000173801.17	protein_coding	JUP	2	OTTHUMG00000133494.10	chr17	HAVANA	gene	41754604	41786931	-	2.40866	9.04326	77.3772	5.93717e-22	1.07548e-18	40.7274
ENSG00000035862.13	protein_coding	TIMP2	2	OTTHUMG00000154517.4	chr17	HAVANA	gene	78852977	78925387	-	2.00247	9.83747	73.1872	1.43797e-21	1.87102e-18	39.873
ENSG00000171345.13	protein_coding	KRT19	1	OTTHUMG00000133422.5	chr17	HAVANA	gene	41523617	41528308	-	1.96141	9.84839	73.0176	1.49195e-21	1.87102e-18	39.8359
ENSG00000173706.15	protein_coding	HEG1	1	OTTHUMG00000159486.5	chr3	HAVANA	gene	124965710	125055997	-	3.16584	8.26906	73.3517	1.38759e-21	1.87102e-18	39.8233
ENSG00000123689.6	protein_coding	G0S2	2	OTTHUMG00000036479.2	chr1	HAVANA	gene	209675412	209676390	+	-5.12415	6.20046	-76.2607	7.47978e-22	1.21943e-18	39.1328
ENSG00000134057.15	protein_coding	CCNB1	1	OTTHUMG00000097817.5	chr5	HAVANA	gene	69167135	69178245	+	-2.42786	8.37444	-69.0009	3.66506e-21	3.98344e-18	38.9147
ENSG00000013588.10	protein_coding	GPRC5A	2	OTTHUMG00000168710.4	chr12	HAVANA	gene	12890782	12917937	+	2.07494	11.9275	69.0066	3.66026e-21	3.98344e-18	38.8084
ENSG00000148677.7	protein_coding	ANKRD1	2	OTTHUMG00000018734.1	chr10	HAVANA	gene	90912096	90921087	-	-2.13895	8.80917	-67.1327	5.66732e-21	5.77465e-18	38.5006
ENSG00000117399.14	protein_coding	CDC20	2	OTTHUMG00000007420.3	chr1	HAVANA	gene	43358981	43363203	+	-2.55092	7.47001	-64.362	1.10659e-20	1.06122e-17	37.7713
ENSG00000073111.14	protein_coding	MCM2	1	OTTHUMG00000159637.9	chr3	HAVANA	gene	127598410	127622436	+	-2.61485	7.18452	-63.3955	1.40701e-20	1.27436e-17	37.5053
ENSG00000070814.22	protein_coding	TCOF1	1	OTTHUMG00000130081.18	chr5	HAVANA	gene	150357629	150400308	+	-2.84201	7.0525	-62.2866	1.86178e-20	1.5975e-17	37.2104
ENSG00000144381.18	protein_coding	HSPD1	2	OTTHUMG00000154463.5	chr2	HAVANA	gene	197486584	197516737	-	-1.95083	9.53495	-60.9026	2.6594e-20	2.10305e-17	36.9321
ENSG00000092969.12	protein_coding	TGFB2	2	OTTHUMG00000039521.3	chr1	HAVANA	gene	218345336	218444619	+	2.85519	7.24643	59.6539	3.6943e-20	2.73764e-17	36.5608
ENSG00000218336.9	protein_coding	TENM3	2	OTTHUMG00000160682.6	chr4	HAVANA	gene	182143987	182803024	+	2.89713	7.49059	58.8254	4.61198e-20	3.26909e-17	36.3697
ENSG00000137699.17	protein_coding	TRIM29	1	OTTHUMG00000140377.8	chr11	HAVANA	gene	120111286	120185529	-	4.56044	5.83163	60.8318	2.70896e-20	2.10305e-17	35.9918
ENSG00000106366.9	protein_coding	SERPINE1	1	OTTHUMG00000157107.3	chr7	HAVANA	gene	101127104	101139247	+	1.73437	10.0369	57.4095	6.78771e-20	4.28229e-17	35.9469
ENSG00000196730.13	protein_coding	DAPK1	1	OTTHUMG00000020150.5	chr9	HAVANA	gene	87497228	87708634	+	3.33736	7.14645	57.2509	7.09206e-20	4.28229e-17	35.8995
ENSG00000149948.14	protein_coding	HMGA2	2	OTTHUMG00000168936.2	chr12	HAVANA	gene	65824460	65966291	+	-3.38901	6.23479	-57.5965	6.44649e-20	4.28229e-17	35.8246
ENSG00000168386.19	protein_coding	FILIP1L	1	OTTHUMG00000159055.3	chr3	HAVANA	gene	99828811	100114513	-	2.1696	8.00191	56.307	9.23138e-20	5.18963e-17	35.7133
ENSG00000070404.10	protein_coding	FSTL3	2	OTTHUMG00000180593.15	chr19	HAVANA	gene	676392	683392	+	3.30414	6.33777	56.9236	7.76711e-20	4.5224e-17	35.6405
ENSG00000115758.14	protein_coding	ODC1	2	OTTHUMG00000090450.5	chr2	HAVANA	gene	10439968	10448327	-	-2.23438	8.56288	-54.3871	1.60001e-19	8.15157e-17	35.1507
ENSG00000111859.17	protein_coding	NEDD9	2	OTTHUMG00000014255.8	chr6	HAVANA	gene	11183298	11382348	-	2.97958	6.7563	54.5562	1.52318e-19	8.15157e-17	35.1286
ENSG00000232774.8	lncRNA	LINC03033	2	OTTHUMG00000171535.2	chr14	HAVANA	gene	61570405	61658696	+	3.19684	6.87136	54.0623	1.75936e-19	8.49767e-17	34.996
ENSG00000144810.16	protein_coding	COL8A1	2	OTTHUMG00000148669.5	chr3	HAVANA	gene	99638475	99799226	+	-3.72279	6.28967	-54.4623	1.56536e-19	8.15157e-17	34.9845
ENSG00000105281.12	protein_coding	SLC1A5	2	OTTHUMG00000183434.3	chr19	HAVANA	gene	46774883	46788594	-	-2.01498	7.56578	-53.6677	1.976e-19	8.94853e-17	34.9525
ENSG00000148180.22	protein_coding	GSN	2	OTTHUMG00000020584.8	chr9	HAVANA	gene	121207794	121332843	+	2.77711	6.60302	53.8686	1.86235e-19	8.67482e-17	34.9232
ENSG00000116285.13	protein_coding	ERRFI1	1	OTTHUMG00000001221.4	chr1	HAVANA	gene	8004404	8026309	-	-2.19263	7.92468	-53.3505	2.1706e-19	9.37587e-17	34.8577
ENSG00000080824.19	protein_coding	HSP90AA1	2	OTTHUMG00000171752.7	chr14	HAVANA	gene	102080742	102139699	-	-1.55656	11.9324	-54.0375	1.77219e-19	8.49767e-17	34.7494
ENSG00000172927.9	protein_coding	MYEOV	2	OTTHUMG00000167836.5	chr11	HAVANA	gene	69294151	69341682	+	-5.36129	5.44044	-57.3581	6.88476e-20	4.28229e-17	34.7052
ENSG00000130826.19	protein_coding	DKC1	1	OTTHUMG00000024242.11	chrX	HAVANA	gene	154762742	154777689	+	-2.11678	7.9858	-52.8403	2.52763e-19	1.00507e-16	34.7036
ENSG00000089685.15	protein_coding	BIRC5	2	OTTHUMG00000177505.9	chr17	HAVANA	gene	78214186	78225636	+	-2.47981	6.7629	-52.9251	2.46424e-19	1.00507e-16	34.6987
ENSG00000101361.17	protein_coding	NOP56	2	OTTHUMG00000031703.9	chr20	HAVANA	gene	2652593	2658393	+	-2.22341	7.53335	-52.5403	2.76629e-19	1.0597e-16	34.6166
ENSG00000099250.18	protein_coding	NRP1	2	OTTHUMG00000019343.8	chr10	HAVANA	gene	33177492	33336262	-	-2.03283	7.58578	-52.3978	2.88794e-19	1.06662e-16	34.5737
ENSG00000136997.22	protein_coding	MYC	1	OTTHUMG00000128475.10	chr8	HAVANA	gene	127735434	127742951	+	-3.53985	5.8443	-53.3277	2.18538e-19	9.37587e-17	34.5563
ENSG00000104738.19	protein_coding	MCM4	1	OTTHUMG00000164205.7	chr8	HAVANA	gene	47960185	47978160	+	-2.36277	7.52741	-52.166	3.09817e-19	1.06662e-16	34.5034
ENSG00000113810.16	protein_coding	SMC4	1	OTTHUMG00000159006.8	chr3	HAVANA	gene	160399274	160434954	+	-2.21827	8.04592	-52.164	3.09999e-19	1.06662e-16	34.4971
ENSG00000167996.16	protein_coding	FTH1	1	OTTHUMG00000166217.6	chr11	HAVANA	gene	61959718	61967634	-	1.33614	11.2152	52.9217	2.46676e-19	1.00507e-16	34.4958
ENSG00000148634.16	protein_coding	HERC4	1	OTTHUMG00000018343.7	chr10	HAVANA	gene	67921899	68075301	-	1.72907	8.68839	52.1214	3.1404e-19	1.06662e-16	34.4607
ENSG00000166508.19	protein_coding	MCM7	2	OTTHUMG00000154671.10	chr7	HAVANA	gene	100092233	100101940	-	-2.30506	7.60947	-51.874	3.38626e-19	1.10393e-16	34.4146
ENSG00000115053.17	protein_coding	NCL	1	OTTHUMG00000153866.4	chr2	HAVANA	gene	231453531	231483641	-	-1.878	9.92335	-52.1991	3.06714e-19	1.06662e-16	34.3991
ENSG00000139289.15	protein_coding	PHLDA1	2	OTTHUMG00000169783.2	chr12	HAVANA	gene	76025447	76031776	-	-2.6037	7.30519	-51.7739	3.49146e-19	1.10393e-16	34.3811
ENSG00000184292.7	protein_coding	TACSTD2	2	OTTHUMG00000010067.2	chr1	HAVANA	gene	58575433	58577252	-	1.84061	9.58978	51.5905	3.69344e-19	1.13612e-16	34.2389
ENSG00000167552.15	protein_coding	TUBA1A	1	OTTHUMG00000169511.4	chr12	HAVANA	gene	49184686	49189080	-	4.35784	5.92849	52.5061	2.79502e-19	1.0597e-16	34.1377
ENSG00000013364.19	protein_coding	MVP	2	OTTHUMG00000048227.11	chr16	HAVANA	gene	29820394	29848039	+	3.0022	6.22678	51.0888	4.31181e-19	1.30177e-16	34.0414
ENSG00000078804.13	protein_coding	TP53INP2	2	OTTHUMG00000032310.4	chr20	HAVANA	gene	34704339	34713439	+	3.54201	5.80646	51.7463	3.5211e-19	1.10393e-16	34.0365
ENSG00000112118.20	protein_coding	MCM3	1	OTTHUMG00000014844.7	chr6	HAVANA	gene	52264014	52284881	-	-2.17191	6.98304	-50.6369	4.96334e-19	1.4196e-16	34.027
ENSG00000113368.12	protein_coding	LMNB1	2	OTTHUMG00000128969.8	chr5	HAVANA	gene	126776623	126837020	+	-2.41764	6.60932	-50.6387	4.96053e-19	1.4196e-16	34.0053
ENSG00000181163.14	protein_coding	NPM1	1	OTTHUMG00000130465.4	chr5	HAVANA	gene	171387116	171411810	+	-1.71311	9.86724	-50.7437	4.80044e-19	1.4196e-16	33.9396
ENSG00000146674.16	protein_coding	IGFBP3	1	OTTHUMG00000023769.10	chr7	HAVANA	gene	45912245	45921874	-	4.03542	5.70474	51.8986	3.36093e-19	1.10393e-16	33.9314
ENSG00000164171.11	protein_coding	ITGA2	2	OTTHUMG00000131165.5	chr5	HAVANA	gene	52989340	53094779	+	-2.27062	8.63857	-50.063	5.94536e-19	1.67116e-16	33.8131
ENSG00000168496.4	protein_coding	FEN1	1	OTTHUMG00000168162.5	chr11	HAVANA	gene	61792911	61797238	+	-2.50769	6.34379	-49.9353	6.19066e-19	1.71062e-16	33.7633
ENSG00000143507.18	protein_coding	DUSP10	2	OTTHUMG00000037269.3	chr1	HAVANA	gene	221701424	221742089	-	2.31337	6.94635	49.808	6.44619e-19	1.75154e-16	33.7618
ENSG00000131747.15	protein_coding	TOP2A	1	OTTHUMG00000155008.4	chr17	HAVANA	gene	40388525	40417896	-	-2.22514	8.34635	-49.6187	6.84677e-19	1.82988e-16	33.6838
ENSG00000182795.13	protein_coding	C1orf116	1	OTTHUMG00000036580.3	chr1	HAVANA	gene	207018522	207032756	-	2.19276	7.49078	49.1652	7.91829e-19	1.95594e-16	33.5652
ENSG00000094804.12	protein_coding	CDC6	2	OTTHUMG00000133324.7	chr17	HAVANA	gene	40287879	40304657	+	-2.95502	5.99176	-49.426	7.28184e-19	1.88438e-16	33.5345
ENSG00000132341.12	protein_coding	RAN	2	OTTHUMG00000134328.9	chr12	HAVANA	gene	130872037	130877678	+	-1.46735	8.98012	-49.1719	7.90108e-19	1.95594e-16	33.4938
ENSG00000171617.16	protein_coding	ENC1	1	OTTHUMG00000102059.8	chr5	HAVANA	gene	74627406	74641424	-	1.60232	9.25388	49.1945	7.84395e-19	1.95594e-16	33.4866
ENSG00000166197.17	protein_coding	NOLC1	1	OTTHUMG00000018944.5	chr10	HAVANA	gene	102152176	102163871	+	-2.04513	7.64657	-48.8675	8.71733e-19	2.08998e-16	33.4634
ENSG00000163346.17	protein_coding	PBXIP1	2	OTTHUMG00000037369.6	chr1	HAVANA	gene	154944076	154956123	-	3.16155	5.81428	49.4653	7.1909e-19	1.88438e-16	33.441
ENSG00000132507.18	protein_coding	EIF5A	2	OTTHUMG00000102197.8	chr17	HAVANA	gene	7306999	7312463	+	-1.34895	9.58268	-49.0762	8.14872e-19	1.98281e-16	33.4144
ENSG00000136542.9	protein_coding	GALNT5	1	OTTHUMG00000131965.3	chr2	HAVANA	gene	157257705	157318491	+	2.04968	8.30643	48.6939	9.22271e-19	2.1791e-16	33.3852
ENSG00000179222.18	protein_coding	MAGED1	2	OTTHUMG00000021540.3	chrX	HAVANA	gene	51803007	51902354	+	2.31356	7.0783	48.4549	9.96976e-19	2.32196e-16	33.3338
ENSG00000169679.15	protein_coding	BUB1	2	OTTHUMG00000153638.6	chr2	HAVANA	gene	110637528	110678063	-	-2.3449	6.9694	-48.3018	1.04818e-18	2.40683e-16	33.2842
ENSG00000198910.14	protein_coding	L1CAM	1	OTTHUMG00000192414.2	chrX	HAVANA	gene	153861514	153886173	-	2.0754	7.93161	48.2014	1.08328e-18	2.45287e-16	33.2381
ENSG00000024422.12	protein_coding	EHD2	2	OTTHUMG00000183266.2	chr19	HAVANA	gene	47713422	47743134	+	2.16725	6.87387	48.0923	1.12285e-18	2.50764e-16	33.2121
ENSG00000010292.13	protein_coding	NCAPD2	1	OTTHUMG00000168513.3	chr12	HAVANA	gene	6493356	6531955	+	-1.95268	8.34043	-47.8113	1.23198e-18	2.678e-16	33.0831
ENSG00000004478.8	protein_coding	FKBP4	2	OTTHUMG00000090429.4	chr12	HAVANA	gene	2794970	2805423	+	-1.91885	7.49948	-47.6385	1.30465e-18	2.77891e-16	33.06
ENSG00000182481.10	protein_coding	KPNA2	2	OTTHUMG00000179784.3	chr17	HAVANA	gene	68035636	68047364	+	-1.66149	8.73376	-47.5759	1.33208e-18	2.78421e-16	32.9761
ENSG00000162458.13	protein_coding	FBLIM1	2	OTTHUMG00000003079.8	chr1	HAVANA	gene	15756607	15786594	+	3.48822	5.55948	47.9956	1.15921e-18	2.55387e-16	32.8647
ENSG00000087086.15	protein_coding	FTL	2	OTTHUMG00000183332.2	chr19	HAVANA	gene	48965309	48966879	+	1.03172	11.1686	47.6204	1.31249e-18	2.77891e-16	32.7524
ENSG00000214049.8	lncRNA	UCA1	2	OTTHUMG00000182287.49	chr19	HAVANA	gene	15828206	15836328	+	1.23969	10.5079	47.3389	1.44162e-18	2.97503e-16	32.7348
ENSG00000166920.13	protein_coding	C15orf48	2	OTTHUMG00000131424.3	chr15	HAVANA	gene	45430579	45448761	+	3.65932	5.75995	47.2107	1.50483e-18	3.06665e-16	32.6752
ENSG00000124207.17	protein_coding	CSE1L	2	OTTHUMG00000033046.4	chr20	HAVANA	gene	49046246	49096960	+	-1.72267	8.4421	-46.5313	1.8928e-18	3.80968e-16	32.6357
ENSG00000137962.13	protein_coding	ARHGAP29	2	OTTHUMG00000010643.4	chr1	HAVANA	gene	94148988	94275068	-	-2.23045	8.26348	-46.428	1.96051e-18	3.87432e-16	32.6155
ENSG00000148773.14	protein_coding	MKI67	2	OTTHUMG00000019255.2	chr10	HAVANA	gene	128096659	128126423	-	-2.21266	8.19487	-46.4102	1.97245e-18	3.87432e-16	32.6131
ENSG00000176619.13	protein_coding	LMNB2	2	OTTHUMG00000150626.7	chr19	HAVANA	gene	2427638	2456959	-	-1.66395	7.92414	-46.2605	2.07594e-18	4.02905e-16	32.571
ENSG00000171848.16	protein_coding	RRM2	2	OTTHUMG00000185555.7	chr2	HAVANA	gene	10120698	10211725	+	-2.2005	7.73452	-45.662	2.55077e-18	4.89237e-16	32.3744
ENSG00000144136.11	protein_coding	SLC20A1	1	OTTHUMG00000131317.5	chr2	HAVANA	gene	112645939	112663825	+	-2.22583	6.60967	-45.4391	2.75608e-18	5.2247e-16	32.3177
ENSG00000165732.14	protein_coding	DDX21	2	OTTHUMG00000018366.2	chr10	HAVANA	gene	68956135	68985068	+	-1.98381	8.21961	-45.1231	3.0776e-18	5.76714e-16	32.1546
ENSG00000198830.12	protein_coding	HMGN2	2	OTTHUMG00000003555.4	chr1	HAVANA	gene	26472440	26476642	+	-1.57389	8.29808	-44.997	3.21694e-18	5.95974e-16	32.1004
ENSG00000166851.15	protein_coding	PLK1	2	OTTHUMG00000096984.6	chr16	HAVANA	gene	23677656	23690367	+	-2.16694	6.72487	-44.6949	3.57858e-18	6.55524e-16	32.0588
ENSG00000110104.13	protein_coding	CCDC86	2	OTTHUMG00000167706.4	chr11	HAVANA	gene	60842113	60851081	+	-1.91847	7.00022	-44.429	3.9326e-18	7.12368e-16	31.9603
ENSG00000154127.10	protein_coding	UBASH3B	2	OTTHUMG00000166025.2	chr11	HAVANA	gene	122655722	122814473	+	-3.4765	5.85735	-44.1	4.42292e-18	7.92382e-16	31.7565
ENSG00000166825.15	protein_coding	ANPEP	2	OTTHUMG00000149814.9	chr15	HAVANA	gene	89784895	89815401	-	2.08414	6.46798	43.8307	4.87265e-18	8.54182e-16	31.7471
ENSG00000085662.14	protein_coding	AKR1B1	2	OTTHUMG00000155322.6	chr7	HAVANA	gene	134442356	134459284	-	2.21131	7.13985	43.6267	5.24557e-18	8.90819e-16	31.6711
ENSG00000276043.5	protein_coding	UHRF1	2	OTTHUMG00000180251.5	chr19	HAVANA	gene	4903080	4962154	+	-2.81396	5.41792	-43.9072	4.74027e-18	8.40007e-16	31.6508
ENSG00000138778.14	protein_coding	CENPE	2	OTTHUMG00000160980.9	chr4	HAVANA	gene	103105349	103198445	-	-2.41763	6.6889	-43.5181	5.45633e-18	8.99658e-16	31.6374
ENSG00000128050.9	protein_coding	PAICS	1	OTTHUMG00000160957.4	chr4	HAVANA	gene	56435741	56464578	+	-1.81079	8.30215	-43.6532	5.19545e-18	8.90819e-16	31.6102
ENSG00000087586.18	protein_coding	AURKA	2	OTTHUMG00000032796.7	chr20	HAVANA	gene	56369389	56392337	-	-1.86573	7.77147	-43.5147	5.46317e-18	8.99658e-16	31.5939
ENSG00000125148.7	protein_coding	MT2A	2	OTTHUMG00000133281.3	chr16	HAVANA	gene	56608584	56609497	+	-1.34948	9.23734	-43.7252	5.06187e-18	8.77911e-16	31.5549
ENSG00000166750.10	protein_coding	SLFN5	1	OTTHUMG00000179858.3	chr17	HAVANA	gene	35243071	35273655	+	3.26485	5.97592	43.4086	5.67796e-18	9.25679e-16	31.5217
ENSG00000151503.14	protein_coding	NCAPD3	1	OTTHUMG00000167172.6	chr11	HAVANA	gene	134150113	134225504	-	-2.12075	6.73581	-43.1852	6.16051e-18	9.75095e-16	31.5149
ENSG00000088325.16	protein_coding	TPX2	2	OTTHUMG00000032190.3	chr20	HAVANA	gene	31739271	31801805	+	-1.93607	8.10774	-43.293	5.92248e-18	9.55982e-16	31.4907
ENSG00000164032.12	protein_coding	H2AZ1	1	OTTHUMG00000131048.7	chr4	HAVANA	gene	99948086	99950355	-	-1.90285	7.81016	-43.2182	6.08658e-18	9.72838e-16	31.4816
ENSG00000139112.11	protein_coding	GABARAPL1	2	OTTHUMG00000168411.10	chr12	HAVANA	gene	10212458	10223128	+	3.03988	5.4151	43.597	5.30239e-18	8.91185e-16	31.4795
ENSG00000109079.10	protein_coding	TNFAIP1	1	OTTHUMG00000132501.5	chr17	HAVANA	gene	28335602	28347009	+	1.69383	7.55611	43.115	6.3209e-18	9.81426e-16	31.4601
ENSG00000107438.9	protein_coding	PDLIM1	2	OTTHUMG00000018810.2	chr10	HAVANA	gene	95237572	95291012	-	1.76755	7.92875	43.1493	6.24203e-18	9.78498e-16	31.4521
ENSG00000126787.13	protein_coding	DLGAP5	1	OTTHUMG00000140310.3	chr14	HAVANA	gene	55148112	55191608	-	-2.16667	6.93904	-42.8402	6.99309e-18	1.07555e-15	31.3833
ENSG00000136205.18	protein_coding	TNS3	1	OTTHUMG00000074075.4	chr7	HAVANA	gene	47275154	47582558	-	1.88446	7.90077	42.7748	7.1638e-18	1.09151e-15	31.3143
ENSG00000115414.21	protein_coding	FN1	2	OTTHUMG00000133054.7	chr2	HAVANA	gene	215360440	215436073	-	2.36481	7.48181	42.6786	7.42342e-18	1.10833e-15	31.3081
ENSG00000156802.13	protein_coding	ATAD2	1	OTTHUMG00000165090.4	chr8	HAVANA	gene	123319850	123416350	-	-2.04717	6.69268	-42.5845	7.68692e-18	1.12307e-15	31.2931
ENSG00000076003.5	protein_coding	MCM6	2	OTTHUMG00000131739.3	chr2	HAVANA	gene	135839626	135876443	-	-2.02162	6.5899	-42.5745	7.71539e-18	1.12307e-15	31.2907
ENSG00000186193.9	protein_coding	SAPCD2	2	OTTHUMG00000020961.4	chr9	HAVANA	gene	137062127	137070557	-	-2.62664	5.69639	-42.7087	7.34098e-18	1.10815e-15	31.2901
ENSG00000265190.7	protein_coding	ANXA8	2	OTTHUMG00000188209.3	chr10	HAVANA	gene	47460162	47484158	-	2.99245	5.58685	42.6587	7.47812e-18	1.10833e-15	31.2036
ENSG00000111206.13	protein_coding	FOXM1	2	OTTHUMG00000168118.2	chr12	HAVANA	gene	2857680	2877174	-	-1.71991	8.12428	-42.4112	8.19845e-18	1.17245e-15	31.1536
ENSG00000011426.11	protein_coding	ANLN	1	OTTHUMG00000023143.8	chr7	HAVANA	gene	36389821	36453791	+	-1.92962	8.43317	-42.4666	8.03095e-18	1.15866e-15	31.1534
ENSG00000130204.13	protein_coding	TOMM40	2	OTTHUMG00000180842.4	chr19	HAVANA	gene	44890569	44903689	+	-1.74453	7.1323	-42.0484	9.39009e-18	1.31971e-15	31.0748
ENSG00000108561.8	protein_coding	C1QBP	1	OTTHUMG00000177875.3	chr17	HAVANA	gene	5432777	5448830	-	-1.83045	7.52247	-42.0008	9.55957e-18	1.33205e-15	31.0369
ENSG00000163811.12	protein_coding	WDR43	1	OTTHUMG00000152015.6	chr2	HAVANA	gene	28894667	28948219	+	-2.13438	6.56523	-41.8712	1.00382e-17	1.38688e-15	31.0275
ENSG00000185567.7	protein_coding	AHNAK2	1	OTTHUMG00000170765.2	chr14	HAVANA	gene	104937244	104978374	-	4.61305	6.25576	42.1103	9.1745e-18	1.30062e-15	31.01
ENSG00000115756.13	protein_coding	HPCAL1	2	OTTHUMG00000090451.6	chr2	HAVANA	gene	10302889	10427617	+	-2.16031	6.10339	-41.7877	1.03594e-17	1.41924e-15	30.9925
ENSG00000102316.17	protein_coding	MAGED2	2	OTTHUMG00000021638.4	chrX	HAVANA	gene	54807599	54816015	+	2.21786	6.30923	41.5266	1.14375e-17	1.50376e-15	30.8957
ENSG00000189057.11	protein_coding	FAM111B	2	OTTHUMG00000167279.5	chr11	HAVANA	gene	59107185	59127412	+	-2.59768	5.79617	-41.5727	1.12387e-17	1.49989e-15	30.8874
ENSG00000142945.13	protein_coding	KIF2C	2	OTTHUMG00000008416.7	chr1	HAVANA	gene	44739818	44767767	+	-2.40299	6.57576	-41.4379	1.18303e-17	1.54296e-15	30.8635
ENSG00000076685.19	protein_coding	NT5C2	2	OTTHUMG00000018981.6	chr10	HAVANA	gene	103087185	103277605	-	1.40668	8.24675	41.608	1.10894e-17	1.49989e-15	30.8353
ENSG00000167325.15	protein_coding	RRM1	2	OTTHUMG00000133361.5	chr11	HAVANA	gene	4094707	4138932	+	-2.00443	7.25876	-41.3435	1.22644e-17	1.57438e-15	30.7994
ENSG00000088247.19	protein_coding	KHSRP	1	OTTHUMG00000180850.3	chr19	HAVANA	gene	6413102	6424811	-	-1.38814	8.5945	-41.5609	1.12893e-17	1.49989e-15	30.7829
ENSG00000180398.13	protein_coding	MCFD2	1	OTTHUMG00000153100.6	chr2	HAVANA	gene	46901870	46941855	-	-1.67199	7.55897	-41.3502	1.22331e-17	1.57438e-15	30.7814
ENSG00000111665.12	protein_coding	CDCA3	1	OTTHUMG00000169014.2	chr12	HAVANA	gene	6844793	6851292	-	-2.3574	5.88201	-41.1722	1.30956e-17	1.65501e-15	30.7492
ENSG00000205542.11	protein_coding	TMSB4X	1	OTTHUMG00000021144.4	chrX	HAVANA	gene	12975110	12977227	+	1.4548	9.33779	41.5547	1.13161e-17	1.49989e-15	30.7163
ENSG00000227234.2	protein_coding	SPANXB1	2	OTTHUMG00000022554.3	chrX	HAVANA	gene	141002594	141003706	+	1.68343	8.18279	41.2596	1.26644e-17	1.61303e-15	30.707
ENSG00000099901.18	protein_coding	RANBP1	1	OTTHUMG00000150490.35	chr22	HAVANA	gene	20115938	20127355	+	-2.01087	6.34505	-41.0127	1.39232e-17	1.70669e-15	30.7015
ENSG00000137807.16	protein_coding	KIF23	1	OTTHUMG00000172062.8	chr15	HAVANA	gene	69414246	69448427	+	-2.11348	6.41398	-40.9498	1.42649e-17	1.73552e-15	30.6769
ENSG00000293495.1	lncRNA	C19orf48P	2	NA	chr19	HAVANA	gene	50797687	50804929	-	-2.60069	5.52081	-41.0606	1.36689e-17	1.70066e-15	30.6676
ENSG00000143375.15	protein_coding	CGN	2	OTTHUMG00000012497.16	chr1	HAVANA	gene	151510510	151538692	+	2.14094	6.6511	40.9056	1.45104e-17	1.75232e-15	30.6584
ENSG00000108828.16	protein_coding	VAT1	1	OTTHUMG00000180816.3	chr17	HAVANA	gene	43014607	43025123	-	1.62963	7.90543	41.0593	1.36757e-17	1.70066e-15	30.6483
ENSG00000149136.9	protein_coding	SSRP1	1	OTTHUMG00000167024.5	chr11	HAVANA	gene	57325986	57335892	-	-1.52686	8.63961	-41.0415	1.37697e-17	1.70066e-15	30.5748
ENSG00000164611.13	protein_coding	PTTG1	2	OTTHUMG00000130328.6	chr5	HAVANA	gene	160421855	160428739	+	-2.28981	6.1218	-40.6179	1.62207e-17	1.91628e-15	30.5473
ENSG00000147883.12	protein_coding	CDKN2B	2	OTTHUMG00000019691.4	chr9	HAVANA	gene	22002903	22009305	-	3.48383	5.4713	40.8743	1.46867e-17	1.76057e-15	30.4917
ENSG00000134802.18	protein_coding	SLC43A3	2	OTTHUMG00000167113.3	chr11	HAVANA	gene	57406954	57427580	-	-2.04629	6.98239	-40.5004	1.69797e-17	1.97728e-15	30.4833
ENSG00000148229.13	protein_coding	POLE3	2	OTTHUMG00000020523.3	chr9	HAVANA	gene	113407235	113410675	-	-2.05241	6.41259	-40.4332	1.74309e-17	2.01543e-15	30.4758
ENSG00000068489.13	protein_coding	PRR11	1	OTTHUMG00000179362.3	chr17	HAVANA	gene	59155732	59206709	+	-1.94171	7.3344	-40.513	1.68966e-17	1.97728e-15	30.4679
ENSG00000106211.10	protein_coding	HSPB1	2	OTTHUMG00000023228.4	chr7	HAVANA	gene	76302673	76304295	+	1.81862	7.00066	40.3653	1.78996e-17	2.05505e-15	30.4317
ENSG00000053372.5	protein_coding	MRTO4	2	OTTHUMG00000002496.4	chr1	HAVANA	gene	19251805	19260128	+	-2.1767	6.41614	-40.0241	2.04659e-17	2.28764e-15	30.3151
ENSG00000146670.10	protein_coding	CDCA5	2	OTTHUMG00000150420.3	chr11	HAVANA	gene	65066300	65084164	-	-2.17717	6.23253	-39.9492	2.10803e-17	2.30653e-15	30.2873
ENSG00000136938.9	protein_coding	ANP32B	2	OTTHUMG00000020338.5	chr9	HAVANA	gene	97983341	98015943	+	-1.94595	7.59399	-40.0437	2.03082e-17	2.28764e-15	30.2629
ENSG00000126215.14	protein_coding	XRCC3	2	OTTHUMG00000169228.6	chr14	HAVANA	gene	103697609	103715504	-	-2.43199	5.5002	-39.9663	2.09382e-17	2.30653e-15	30.2579
ENSG00000076382.17	protein_coding	SPAG5	2	OTTHUMG00000166586.27	chr17	HAVANA	gene	28577565	28599025	-	-1.97362	6.96205	-39.9152	2.1365e-17	2.30671e-15	30.2503
ENSG00000096384.20	protein_coding	HSP90AB1	2	OTTHUMG00000014761.8	chr6	HAVANA	gene	44246166	44253888	+	-1.21841	10.8369	-40.8013	1.5107e-17	1.79774e-15	30.2335
ENSG00000117318.9	protein_coding	ID3	2	OTTHUMG00000003229.3	chr1	HAVANA	gene	23557926	23559501	-	2.82678	5.37432	40.0215	2.04868e-17	2.28764e-15	30.2153
ENSG00000130816.17	protein_coding	DNMT1	1	OTTHUMG00000180397.4	chr19	HAVANA	gene	10133342	10231286	-	-1.54905	7.65545	-39.9286	2.12524e-17	2.30671e-15	30.2079
ENSG00000164104.12	protein_coding	HMGB2	2	OTTHUMG00000160799.3	chr4	HAVANA	gene	173331376	173334432	-	-2.30393	6.36469	-39.6899	2.33617e-17	2.4572e-15	30.1836
ENSG00000142798.20	protein_coding	HSPG2	2	OTTHUMG00000002674.11	chr1	HAVANA	gene	21822244	21937310	-	2.47739	7.75338	39.7973	2.23867e-17	2.40112e-15	30.167
ENSG00000109805.10	protein_coding	NCAPG	2	OTTHUMG00000128539.4	chr4	HAVANA	gene	17810979	17844865	+	-2.27069	6.55452	-39.5217	2.49806e-17	2.57758e-15	30.1119
ENSG00000134590.14	protein_coding	RTL8C	2	OTTHUMG00000022465.4	chrX	HAVANA	gene	135032355	135033546	+	1.6252	7.33208	39.6225	2.3997e-17	2.50784e-15	30.1118
ENSG00000132646.11	protein_coding	PCNA	2	OTTHUMG00000031798.3	chr20	HAVANA	gene	5114953	5126626	-	-2.21888	6.53919	-39.4734	2.54679e-17	2.61106e-15	30.0925
ENSG00000134690.11	protein_coding	CDCA8	2	OTTHUMG00000004320.2	chr1	HAVANA	gene	37692481	37709719	+	-2.24364	6.07534	-39.458	2.56253e-17	2.61106e-15	30.0918
ENSG00000164045.12	protein_coding	CDC25A	2	OTTHUMG00000133535.6	chr3	HAVANA	gene	48157146	48188417	-	-2.8274	5.17393	-39.6956	2.33088e-17	2.4572e-15	30.0867
ENSG00000143476.18	protein_coding	DTL	2	OTTHUMG00000037133.2	chr1	HAVANA	gene	212035553	212107400	+	-3.24081	4.74497	-40.0515	2.02463e-17	2.28764e-15	30.0485
ENSG00000119403.15	protein_coding	PHF19	2	OTTHUMG00000020577.7	chr9	HAVANA	gene	120855651	120894896	-	-1.98328	6.22582	-39.3086	2.72059e-17	2.68811e-15	30.0316
ENSG00000158825.6	protein_coding	CDA	2	OTTHUMG00000002845.2	chr1	HAVANA	gene	20589086	20618903	+	1.96165	6.51691	39.3099	2.71912e-17	2.68811e-15	30.0289
ENSG00000138413.14	protein_coding	IDH1	2	OTTHUMG00000132943.14	chr2	HAVANA	gene	208236229	208266074	-	2.02802	6.43217	39.2159	2.82386e-17	2.75023e-15	29.9932
ENSG00000042493.16	protein_coding	CAPG	1	OTTHUMG00000130183.23	chr2	HAVANA	gene	85394753	85418432	-	2.25755	6.27578	39.2001	2.84185e-17	2.75023e-15	29.9889
ENSG00000135925.9	protein_coding	WNT10A	1	OTTHUMG00000133085.4	chr2	HAVANA	gene	218880852	218899581	+	3.55716	5.42011	39.5586	2.46162e-17	2.55616e-15	29.9827
ENSG00000184575.12	protein_coding	XPOT	2	OTTHUMG00000168794.4	chr12	HAVANA	gene	64404392	64451125	+	-1.62709	7.49859	-39.317	2.71144e-17	2.68811e-15	29.9699
ENSG00000145287.11	protein_coding	PLAC8	1	OTTHUMG00000130294.2	chr4	HAVANA	gene	83090048	83137075	-	1.97759	6.8343	39.1921	2.85094e-17	2.75023e-15	29.9695
ENSG00000213722.10	protein_coding	DDAH2	2	OTTHUMG00000031212.7	chr6	HAVANA	gene	31727038	31730617	-	2.81189	5.23752	39.277	2.75529e-17	2.70599e-15	29.9064
ENSG00000065183.16	protein_coding	WDR3	2	OTTHUMG00000012197.3	chr1	HAVANA	gene	117929720	117966543	+	-2.09501	6.50303	-38.9847	3.09995e-17	2.9213e-15	29.8945
ENSG00000152952.14	protein_coding	PLOD2	2	OTTHUMG00000159417.3	chr3	HAVANA	gene	146035139	146163725	-	1.84689	9.12544	39.4423	2.57862e-17	2.61114e-15	29.8877
ENSG00000167191.12	protein_coding	GPRC5B	2	OTTHUMG00000131460.5	chr16	HAVANA	gene	19856691	19886167	-	1.40473	8.29792	39.1565	2.89211e-17	2.77354e-15	29.842
ENSG00000117724.15	protein_coding	CENPF	2	OTTHUMG00000036955.2	chr1	HAVANA	gene	214603185	214664574	+	-2.0254	7.46229	-38.9893	3.09421e-17	2.9213e-15	29.8415
ENSG00000109971.14	protein_coding	HSPA8	1	OTTHUMG00000166030.2	chr11	HAVANA	gene	123057489	123063230	-	-0.876667	11.3955	-39.9536	2.10431e-17	2.30653e-15	29.8058
ENSG00000076248.12	protein_coding	UNG	2	OTTHUMG00000169247.1	chr12	HAVANA	gene	109097597	109126725	+	-2.08794	5.94431	-38.6737	3.51736e-17	3.27677e-15	29.7755
ENSG00000054793.14	protein_coding	ATP9A	1	OTTHUMG00000032751.4	chr20	HAVANA	gene	51596514	51768390	-	1.67968	7.48707	38.7519	3.40713e-17	3.19233e-15	29.7429
ENSG00000145386.11	protein_coding	CCNA2	2	OTTHUMG00000133072.4	chr4	HAVANA	gene	121816444	121823883	-	-2.15382	6.49316	-38.5799	3.65477e-17	3.36631e-15	29.7292
ENSG00000101057.16	protein_coding	MYBL2	2	OTTHUMG00000033062.2	chr20	HAVANA	gene	43667019	43716495	+	-1.99504	6.20025	-38.5414	3.71281e-17	3.40056e-15	29.7202
ENSG00000272398.6	protein_coding	CD24	2	OTTHUMG00000188439.3	chr6	HAVANA	gene	106969831	106975627	-	5.43011	5.48075	39.7111	2.31658e-17	2.4572e-15	29.7162
ENSG00000168411.14	protein_coding	RFWD3	2	OTTHUMG00000177368.7	chr16	HAVANA	gene	74621399	74666877	-	-1.60251	7.09428	-38.6006	3.62393e-17	3.35687e-15	29.7003
ENSG00000034510.6	protein_coding	TMSB10	2	OTTHUMG00000130027.7	chr2	HAVANA	gene	84905656	84906671	+	1.11906	9.72495	39.1034	2.95479e-17	2.81707e-15	29.6709
ENSG00000123485.12	protein_coding	HJURP	2	OTTHUMG00000059125.12	chr2	HAVANA	gene	233833416	233854566	-	-2.27149	5.70118	-38.2849	4.12509e-17	3.65133e-15	29.6103
ENSG00000188153.14	protein_coding	COL4A5	1	OTTHUMG00000022182.6	chrX	HAVANA	gene	108439838	108697545	+	1.74859	7.04766	38.2741	4.14338e-17	3.65133e-15	29.5744
ENSG00000170515.14	protein_coding	PA2G4	1	OTTHUMG00000170173.4	chr12	HAVANA	gene	56104537	56113910	+	-1.85584	7.76687	-38.3962	3.94055e-17	3.56905e-15	29.5677
ENSG00000108179.14	protein_coding	PPIF	2	OTTHUMG00000018562.5	chr10	HAVANA	gene	79347469	79355334	+	-1.53711	8.28467	-38.4459	3.86084e-17	3.51638e-15	29.5403
ENSG00000039068.20	protein_coding	CDH1	2	OTTHUMG00000137561.6	chr16	HAVANA	gene	68737292	68835537	+	1.42947	8.31046	38.352	4.01274e-17	3.59449e-15	29.5025
ENSG00000100526.21	protein_coding	CDKN3	1	OTTHUMG00000140302.4	chr14	HAVANA	gene	54396849	54420218	+	-2.17884	6.22763	-38.0064	4.62835e-17	4.05678e-15	29.4991
ENSG00000171793.17	protein_coding	CTPS1	2	OTTHUMG00000005712.13	chr1	HAVANA	gene	40979300	41012565	+	-1.81057	6.65512	-37.8931	4.85152e-17	4.22965e-15	29.4316
ENSG00000113460.13	protein_coding	BRIX1	2	OTTHUMG00000162021.3	chr5	HAVANA	gene	34915677	34925996	+	-2.17146	5.78617	-37.7752	5.0958e-17	4.41898e-15	29.4042
ENSG00000058804.12	protein_coding	NDC1	2	OTTHUMG00000008073.2	chr1	HAVANA	gene	53765478	53838463	-	-2.36307	5.84458	-37.7223	5.20963e-17	4.49379e-15	29.3823
ENSG00000014216.16	protein_coding	CAPN1	2	OTTHUMG00000165614.2	chr11	HAVANA	gene	65180566	65212006	+	1.09881	9.51947	38.3675	3.98729e-17	3.59143e-15	29.381
ENSG00000101447.15	protein_coding	FAM83D	2	OTTHUMG00000032462.4	chr20	HAVANA	gene	38926312	38953106	+	-2.18028	5.89311	-37.4783	5.77068e-17	4.95154e-15	29.2815
ENSG00000013810.21	protein_coding	TACC3	1	OTTHUMG00000089535.25	chr4	HAVANA	gene	1712858	1745171	+	-1.83777	6.33906	-37.3297	6.14366e-17	5.24398e-15	29.2076
ENSG00000112984.12	protein_coding	KIF20A	2	OTTHUMG00000129195.4	chr5	HAVANA	gene	138178719	138187723	+	-1.84599	6.56503	-37.2663	6.31049e-17	5.33056e-15	29.1698
ENSG00000132780.17	protein_coding	NASP	1	OTTHUMG00000007826.5	chr1	HAVANA	gene	45583846	45618904	+	-1.88364	6.73458	-37.2157	6.44697e-17	5.41778e-15	29.1387
ENSG00000157456.8	protein_coding	CCNB2	1	OTTHUMG00000132715.3	chr15	HAVANA	gene	59105126	59125045	+	-2.11225	5.90378	-37.0857	6.81253e-17	5.6378e-15	29.1157
ENSG00000134954.14	protein_coding	ETS1	1	OTTHUMG00000165799.4	chr11	HAVANA	gene	128458761	128587558	-	-1.47642	7.50506	-37.2726	6.29364e-17	5.33056e-15	29.1028
ENSG00000179431.7	protein_coding	FJX1	2	OTTHUMG00000166310.2	chr11	HAVANA	gene	35618460	35620865	+	-2.61419	5.37836	-37.0342	6.96335e-17	5.73351e-15	29.0691
ENSG00000089006.17	protein_coding	SNX5	2	OTTHUMG00000031953.10	chr20	HAVANA	gene	17941597	17968980	-	-1.55401	7.33539	-37.0067	7.04548e-17	5.77198e-15	29.0011
ENSG00000214706.12	protein_coding	IFRD2	2	OTTHUMG00000156935.3	chr3	HAVANA	gene	50287732	50292918	-	-1.73355	6.4736	-36.8381	7.5711e-17	6.14088e-15	28.9885
ENSG00000091986.16	protein_coding	CCDC80	1	OTTHUMG00000159265.4	chr3	HAVANA	gene	112596797	112649530	-	2.691	5.10702	36.8442	7.55126e-17	6.14088e-15	28.9296
ENSG00000135318.12	protein_coding	NT5E	2	OTTHUMG00000015139.3	chr6	HAVANA	gene	85449584	85495791	+	-3.75275	4.79044	-37.162	6.59544e-17	5.51413e-15	28.903
ENSG00000184009.13	protein_coding	ACTG1	2	OTTHUMG00000177955.9	chr17	HAVANA	gene	81509413	81523847	-	0.670297	12.804	38.2817	4.13044e-17	3.65133e-15	28.8996
ENSG00000155189.12	protein_coding	AGPAT5	1	OTTHUMG00000163656.5	chr8	HAVANA	gene	6708642	6761503	+	-2.12002	6.03073	-36.5541	8.55307e-17	6.7364e-15	28.886
ENSG00000228437.5	lncRNA	LINC02474	2	OTTHUMG00000037424.1	chr1	HAVANA	gene	221966341	221984964	+	1.97158	7.39649	36.7188	7.96798e-17	6.39911e-15	28.883
ENSG00000107554.17	protein_coding	DNMBP	2	OTTHUMG00000018897.5	chr10	HAVANA	gene	99875577	100009947	-	-1.89515	6.15965	-36.54	8.60505e-17	6.7364e-15	28.8746
ENSG00000063660.9	protein_coding	GPC1	1	OTTHUMG00000133349.7	chr2	HAVANA	gene	240435663	240468076	+	2.28432	6.00304	36.4828	8.8203e-17	6.81504e-15	28.8578
ENSG00000163283.7	protein_coding	ALPP	2	OTTHUMG00000133255.5	chr2	HAVANA	gene	232378724	232382889	+	5.17525	4.47324	39.3864	2.63701e-17	2.65378e-15	28.8511
ENSG00000137267.7	protein_coding	TUBB2A	2	OTTHUMG00000014135.2	chr6	HAVANA	gene	3153497	3157544	-	2.43838	5.3721	36.5262	8.65664e-17	6.7364e-15	28.8468
ENSG00000008517.19	protein_coding	IL32	2	OTTHUMG00000167498.6	chr16	HAVANA	gene	3065297	3082192	+	1.79719	7.46811	36.6252	8.29493e-17	6.62903e-15	28.8325
ENSG00000143799.14	protein_coding	PARP1	2	OTTHUMG00000037556.4	chr1	HAVANA	gene	226360210	226408154	-	-1.43644	7.93801	-36.7192	7.96687e-17	6.39911e-15	28.8216
ENSG00000172725.14	protein_coding	CORO1B	2	OTTHUMG00000167775.4	chr11	HAVANA	gene	67435510	67443821	-	1.49678	7.84977	36.5603	8.53002e-17	6.7364e-15	28.7657
ENSG00000117877.11	protein_coding	POLR1G	2	OTTHUMG00000182120.2	chr19	HAVANA	gene	45406644	45410737	+	-3.12708	4.91222	-36.5378	8.61314e-17	6.7364e-15	28.7657
ENSG00000139182.15	protein_coding	CLSTN3	1	OTTHUMG00000168167.5	chr12	HAVANA	gene	7129698	7158945	+	2.48802	6.05308	36.2499	9.75625e-17	7.39796e-15	28.7571
ENSG00000109685.19	protein_coding	NSD2	2	OTTHUMG00000121147.15	chr4	HAVANA	gene	1871393	1982207	+	-1.57554	7.29051	-36.4225	9.0529e-17	6.96176e-15	28.7471
ENSG00000120217.14	protein_coding	CD274	2	OTTHUMG00000019503.3	chr9	HAVANA	gene	5450503	5470566	+	-2.31958	5.5622	-36.2268	9.85463e-17	7.41078e-15	28.7432
ENSG00000105011.9	protein_coding	ASF1B	2	OTTHUMG00000150401.3	chr19	HAVANA	gene	14119512	14136613	-	-2.35645	5.44709	-36.2246	9.86407e-17	7.41078e-15	28.7372
ENSG00000143878.10	protein_coding	RHOB	2	OTTHUMG00000090755.4	chr2	HAVANA	gene	20447074	20449440	+	3.47288	5.66512	36.2915	9.58167e-17	7.3338e-15	28.7369
ENSG00000123416.15	protein_coding	TUBA1B	1	OTTHUMG00000170410.2	chr12	HAVANA	gene	49127782	49131397	-	-0.921896	10.3269	-37.093	6.79166e-17	5.6378e-15	28.7213
ENSG00000136244.12	protein_coding	IL6	2	OTTHUMG00000023178.7	chr7	HAVANA	gene	22725884	22732002	+	2.99888	5.31394	36.2648	9.6933e-17	7.38457e-15	28.7046
ENSG00000175063.17	protein_coding	UBE2C	2	OTTHUMG00000033038.3	chr20	HAVANA	gene	45812576	45816957	+	-1.96876	6.27128	-36.1406	1.02315e-16	7.61661e-15	28.6959
ENSG00000178999.13	protein_coding	AURKB	1	OTTHUMG00000108189.6	chr17	HAVANA	gene	8204733	8210600	-	-2.21315	5.5071	-36.1138	1.03517e-16	7.63638e-15	28.6937
ENSG00000113013.16	protein_coding	HSPA9	2	OTTHUMG00000129206.7	chr5	HAVANA	gene	138553756	138575675	-	-1.33246	8.86027	-36.5207	8.6772e-17	6.7364e-15	28.6399
ENSG00000132561.14	protein_coding	MATN2	1	OTTHUMG00000164795.5	chr8	HAVANA	gene	97868840	98036724	+	2.78799	5.18645	36.124	1.0306e-16	7.63638e-15	28.637
ENSG00000035499.13	protein_coding	DEPDC1B	2	OTTHUMG00000097083.4	chr5	HAVANA	gene	60596912	60700190	-	-2.20882	5.44768	-35.9575	1.10836e-16	8.02433e-15	28.624
ENSG00000124006.15	protein_coding	OBSL1	2	OTTHUMG00000059157.13	chr2	HAVANA	gene	219550728	219571859	-	1.63866	6.63031	35.9969	1.0894e-16	7.9288e-15	28.6143
ENSG00000131153.9	protein_coding	GINS2	1	OTTHUMG00000137646.4	chr16	HAVANA	gene	85676198	85690073	-	-3.03387	4.80498	-36.1676	1.01121e-16	7.56225e-15	28.5968
ENSG00000186185.14	protein_coding	KIF18B	1	OTTHUMG00000179867.2	chr17	HAVANA	gene	44924709	44947773	-	-2.30794	5.72667	-35.8308	1.17172e-16	8.30543e-15	28.5741
ENSG00000188486.4	protein_coding	H2AX	2	OTTHUMG00000166196.4	chr11	HAVANA	gene	119093874	119095465	-	-1.62911	7.21486	-36.0043	1.0859e-16	7.9288e-15	28.5669
ENSG00000123136.15	protein_coding	DDX39A	1	OTTHUMG00000182181.5	chr19	HAVANA	gene	14408798	14419383	-	-1.51998	6.95202	-35.9392	1.11729e-16	8.02433e-15	28.5572
ENSG00000092621.13	protein_coding	PHGDH	2	OTTHUMG00000012100.6	chr1	HAVANA	gene	119648411	119744218	+	-1.86105	6.60462	-35.8542	1.15975e-16	8.25653e-15	28.5485
ENSG00000089639.11	protein_coding	GMIP	2	OTTHUMG00000182329.3	chr19	HAVANA	gene	19629476	19643657	-	2.12728	6.01686	35.7157	1.23262e-16	8.55126e-15	28.5222
ENSG00000226887.8	protein_coding	ERVMER34-1	2	OTTHUMG00000150366.4	chr4	HAVANA	gene	52722618	52751586	-	-2.83593	4.79195	-35.9456	1.11416e-16	8.02433e-15	28.5187
ENSG00000128283.7	protein_coding	CDC42EP1	2	OTTHUMG00000150591.6	chr22	HAVANA	gene	37560480	37569405	+	-2.72711	5.2294	-35.7555	1.21122e-16	8.43866e-15	28.5112
ENSG00000163975.14	protein_coding	MELTF	2	OTTHUMG00000155518.3	chr3	HAVANA	gene	196980590	197029835	-	1.33347	8.37208	36.1001	1.0414e-16	7.64774e-15	28.5066
ENSG00000140525.20	protein_coding	FANCI	1	OTTHUMG00000132993.7	chr15	HAVANA	gene	89243945	89317261	+	-2.14654	6.10795	-35.6929	1.24509e-16	8.60117e-15	28.5061
ENSG00000182199.11	protein_coding	SHMT2	1	OTTHUMG00000171246.15	chr12	HAVANA	gene	57229573	57234935	+	-1.46794	7.60568	-35.8949	1.1392e-16	8.14575e-15	28.4824
ENSG00000169499.15	protein_coding	PLEKHA2	1	OTTHUMG00000164069.9	chr8	HAVANA	gene	38901235	38973912	+	1.64796	7.17463	35.7851	1.19553e-16	8.36514e-15	28.4788
ENSG00000114423.23	protein_coding	CBLB	1	OTTHUMG00000150654.18	chr3	HAVANA	gene	105655461	105869552	-	2.47283	5.52336	35.6261	1.28236e-16	8.82125e-15	28.4725
ENSG00000124766.7	protein_coding	SOX4	2	OTTHUMG00000016101.3	chr6	HAVANA	gene	21593751	21598619	+	4.02919	6.37706	35.5885	1.30388e-16	8.93159e-15	28.4659
ENSG00000164741.15	protein_coding	DLC1	1	OTTHUMG00000090825.12	chr8	HAVANA	gene	13083361	13604610	-	-2.30726	5.54758	-35.56	1.3204e-16	9.00688e-15	28.4528
ENSG00000118193.12	protein_coding	KIF14	2	OTTHUMG00000035723.2	chr1	HAVANA	gene	200551497	200620751	-	-2.18664	5.59823	-35.522	1.34283e-16	9.08391e-15	28.4375
ENSG00000122359.18	protein_coding	ANXA11	2	OTTHUMG00000018604.4	chr10	HAVANA	gene	80150889	80205572	-	1.32948	7.95305	35.7885	1.19375e-16	8.36514e-15	28.4061
ENSG00000176890.16	protein_coding	TYMS	1	OTTHUMG00000131473.7	chr18	HAVANA	gene	657653	673578	+	-2.31514	5.29394	-35.3618	1.44184e-16	9.51671e-15	28.3556
ENSG00000147044.23	protein_coding	CASK	2	OTTHUMG00000021378.10	chrX	HAVANA	gene	41514934	41923554	-	1.66384	6.67764	35.4275	1.40031e-16	9.35109e-15	28.3555
ENSG00000122952.17	protein_coding	ZWINT	2	OTTHUMG00000018261.3	chr10	HAVANA	gene	56357227	56361273	-	-2.02877	6.17768	-35.2861	1.4913e-16	9.80349e-15	28.3196
ENSG00000146731.11	protein_coding	CCT6A	2	OTTHUMG00000022842.4	chr7	HAVANA	gene	56051685	56063989	+	-1.22395	8.99841	-35.8061	1.18451e-16	8.35975e-15	28.2994
ENSG00000196975.16	protein_coding	ANXA4	2	OTTHUMG00000129649.6	chr2	HAVANA	gene	69644425	69827112	+	2.34313	5.86401	35.1961	1.55253e-16	1.0165e-14	28.2933
ENSG00000164292.13	protein_coding	RHOBTB3	2	OTTHUMG00000121171.4	chr5	HAVANA	gene	95713522	95824383	+	1.81509	8.25707	35.5336	1.33591e-16	9.07473e-15	28.2673
ENSG00000134684.13	protein_coding	YARS1	2	OTTHUMG00000003933.2	chr1	HAVANA	gene	32775237	32818031	-	-1.52115	7.73048	-35.4208	1.40451e-16	9.35109e-15	28.2553
ENSG00000197451.12	protein_coding	HNRNPAB	2	OTTHUMG00000163452.2	chr5	HAVANA	gene	178204533	178211163	+	-1.48416	7.8833	-35.4196	1.40527e-16	9.35109e-15	28.2398
ENSG00000178921.14	protein_coding	PFAS	2	OTTHUMG00000108188.5	chr17	HAVANA	gene	8247618	8270491	+	-1.97424	5.81731	-35.0325	1.67063e-16	1.07333e-14	28.2173
ENSG00000189403.15	protein_coding	HMGB1	2	OTTHUMG00000016670.8	chr13	HAVANA	gene	30456704	30617597	-	-1.76291	6.50029	-35.0969	1.62302e-16	1.05419e-14	28.2115
ENSG00000109084.14	protein_coding	TMEM97	1	OTTHUMG00000132497.6	chr17	HAVANA	gene	28319200	28328685	+	-2.1753	5.57972	-34.9538	1.73085e-16	1.09372e-14	28.1846
ENSG00000181830.9	protein_coding	SLC35C1	2	OTTHUMG00000166519.3	chr11	HAVANA	gene	45804072	45813016	+	1.5685	6.76274	35.0344	1.66924e-16	1.07333e-14	28.1683
ENSG00000146918.20	protein_coding	NCAPG2	2	OTTHUMG00000151438.5	chr7	HAVANA	gene	158631169	158704804	-	-1.84823	6.52396	-35.0014	1.69418e-16	1.07891e-14	28.1673
ENSG00000108106.14	protein_coding	UBE2S	1	OTTHUMG00000180811.5	chr19	HAVANA	gene	55399745	55407788	-	-2.05294	7.32063	-35.1102	1.6134e-16	1.05213e-14	28.1565
ENSG00000293476.1	lncRNA	ENSG00000293476	2	NA	chr7	HAVANA	gene	150322639	150332721	+	1.75104	6.44842	34.8884	1.78261e-16	1.12208e-14	28.1265
ENSG00000108854.16	protein_coding	SMURF2	2	OTTHUMG00000179189.3	chr17	HAVANA	gene	64542282	64662307	-	-1.59339	7.21928	-35.0262	1.67537e-16	1.07333e-14	28.1199
ENSG00000055044.11	protein_coding	NOP58	2	OTTHUMG00000132840.4	chr2	HAVANA	gene	202265736	202303661	+	-1.87922	6.64639	-34.877	1.7918e-16	1.12353e-14	28.1019
ENSG00000119326.15	protein_coding	CTNNAL1	2	OTTHUMG00000020466.4	chr9	HAVANA	gene	108942569	109013522	-	-1.50515	7.32077	-34.9726	1.71625e-16	1.08871e-14	28.0852
ENSG00000112759.19	protein_coding	SLC29A1	2	OTTHUMG00000014759.5	chr6	HAVANA	gene	44219553	44234142	+	-2.52927	5.17301	-34.6835	1.95576e-16	1.19867e-14	28.0438
ENSG00000198554.12	protein_coding	WDHD1	2	OTTHUMG00000140304.9	chr14	HAVANA	gene	54938949	55027105	-	-2.33154	5.67326	-34.6375	1.99697e-16	1.21935e-14	28.0418
ENSG00000116649.10	protein_coding	SRM	1	OTTHUMG00000002119.4	chr1	HAVANA	gene	11054584	11060020	-	-1.60487	6.78937	-34.7565	1.89205e-16	1.16841e-14	28.031
ENSG00000275216.2	lncRNA	LINC03061	2	OTTHUMG00000187241.2	chr13	HAVANA	gene	109269634	109278512	+	1.26532	9.82901	35.3944	1.42108e-16	9.41782e-15	28.0176
ENSG00000255717.9	lncRNA	SNHG1	2	OTTHUMG00000167743.15	chr11	HAVANA	gene	62851978	62855953	-	-2.2084	6.72744	-34.5971	2.03402e-16	1.23734e-14	27.9715
ENSG00000132361.18	protein_coding	CLUH	2	OTTHUMG00000177575.10	chr17	HAVANA	gene	2689386	2712663	-	-1.5172	7.15923	-34.6924	1.94785e-16	1.19833e-14	27.969
ENSG00000116062.19	protein_coding	MSH6	2	OTTHUMG00000129129.13	chr2	HAVANA	gene	47695530	47810063	+	-1.60643	6.7637	-34.5504	2.07772e-16	1.25456e-14	27.9372
ENSG00000150753.12	protein_coding	CCT5	2	OTTHUMG00000131042.8	chr5	HAVANA	gene	10249929	10266389	+	-1.25525	9.01779	-35.0216	1.67882e-16	1.07333e-14	27.9336
ENSG00000204262.14	protein_coding	COL5A2	2	OTTHUMG00000149842.5	chr2	HAVANA	gene	189031898	189225312	-	3.80895	4.33343	35.5119	1.34882e-16	9.08671e-15	27.9257
ENSG00000071539.14	protein_coding	TRIP13	1	OTTHUMG00000090349.28	chr5	HAVANA	gene	892884	919357	+	-2.33622	5.63529	-34.3724	2.25361e-16	1.3409e-14	27.9212
ENSG00000082781.12	protein_coding	ITGB5	1	OTTHUMG00000159432.10	chr3	HAVANA	gene	124761948	124901418	-	-1.51808	6.8745	-34.5256	2.10126e-16	1.26409e-14	27.9154
ENSG00000030582.19	protein_coding	GRN	1	OTTHUMG00000181816.4	chr17	HAVANA	gene	44345246	44353106	+	1.16551	8.52369	34.8439	1.8188e-16	1.13609e-14	27.9088
ENSG00000156471.13	protein_coding	PTDSS1	2	OTTHUMG00000164687.3	chr8	HAVANA	gene	96261902	96336995	+	-1.49293	7.04079	-34.3865	2.23909e-16	1.33714e-14	27.8355
ENSG00000131242.18	protein_coding	RAB11FIP4	1	OTTHUMG00000132787.7	chr17	HAVANA	gene	31391675	31538211	+	2.02907	5.78761	34.1656	2.47794e-16	1.43255e-14	27.8252
ENSG00000138735.16	protein_coding	PDE5A	2	OTTHUMG00000132971.7	chr4	HAVANA	gene	119494397	119628804	-	3.50095	6.00554	34.1403	2.50703e-16	1.44284e-14	27.8131
ENSG00000198369.10	protein_coding	SPRED2	1	OTTHUMG00000152737.6	chr2	HAVANA	gene	65310851	65432637	-	-2.69237	4.60898	-34.3206	2.30765e-16	1.3631e-14	27.7974
ENSG00000117395.13	protein_coding	EBNA1BP2	2	OTTHUMG00000007284.2	chr1	HAVANA	gene	43164175	43270936	-	-1.43429	7.7234	-34.4227	2.20229e-16	1.32e-14	27.7894
ENSG00000049759.20	protein_coding	NEDD4L	1	OTTHUMG00000179875.12	chr18	HAVANA	gene	58044226	58401540	+	-1.52188	7.36327	-34.2636	2.3688e-16	1.38915e-14	27.749
ENSG00000135446.17	protein_coding	CDK4	1	OTTHUMG00000170382.6	chr12	HAVANA	gene	57747727	57756013	-	-1.60398	7.0904	-34.1976	2.4418e-16	1.41668e-14	27.7434
ENSG00000171490.13	protein_coding	RSL1D1	1	OTTHUMG00000129824.6	chr16	HAVANA	gene	11833850	11851580	-	-1.58344	7.20463	-34.2106	2.4272e-16	1.41324e-14	27.7391
ENSG00000247077.8	protein_coding	PGAM5	1	OTTHUMG00000168021.3	chr12	HAVANA	gene	132710819	132722734	+	-1.77272	6.23206	-34.0245	2.6447e-16	1.50757e-14	27.7319
ENSG00000065911.13	protein_coding	MTHFD2	2	OTTHUMG00000129814.5	chr2	HAVANA	gene	74186172	74217565	+	-1.80752	6.99141	-34.1347	2.51345e-16	1.44284e-14	27.7254
ENSG00000179409.11	protein_coding	GEMIN4	1	OTTHUMG00000177495.5	chr17	HAVANA	gene	744421	753999	-	-1.85671	6.07849	-33.9869	2.69106e-16	1.52866e-14	27.7245
ENSG00000150093.20	protein_coding	ITGB1	1	OTTHUMG00000017928.11	chr10	HAVANA	gene	32887273	33005792	-	1.09674	10.0403	34.825	1.83439e-16	1.14145e-14	27.7214
ENSG00000172936.18	protein_coding	MYD88	1	OTTHUMG00000131083.11	chr3	HAVANA	gene	38138552	38143024	+	1.82168	6.76396	34.0457	2.6189e-16	1.4981e-14	27.712
ENSG00000187514.17	protein_coding	PTMA	1	OTTHUMG00000153810.3	chr2	HAVANA	gene	231706895	231713551	+	-0.999344	9.52379	-34.5848	2.04539e-16	1.23963e-14	27.6662
ENSG00000168487.20	protein_coding	BMP1	2	OTTHUMG00000097761.9	chr8	HAVANA	gene	22165140	22212326	+	2.56129	5.3067	33.7224	3.04283e-16	1.71651e-14	27.6073
ENSG00000167513.9	protein_coding	CDT1	2	OTTHUMG00000173467.3	chr16	HAVANA	gene	88803789	88809258	+	-2.31012	5.54616	-33.6773	3.1075e-16	1.73499e-14	27.6004
ENSG00000106263.19	protein_coding	EIF3B	2	OTTHUMG00000022839.6	chr7	HAVANA	gene	2354086	2380745	+	-1.08385	9.00469	-34.2768	2.35457e-16	1.38579e-14	27.5803
ENSG00000166689.18	protein_coding	PLEKHA7	1	OTTHUMG00000165954.5	chr11	HAVANA	gene	16777297	17014415	-	2.36333	5.32023	33.6459	3.15349e-16	1.75465e-14	27.5768
ENSG00000161800.13	protein_coding	RACGAP1	1	OTTHUMG00000169811.7	chr12	HAVANA	gene	49976923	50033136	-	-1.67595	6.56788	-33.7426	3.0143e-16	1.70633e-14	27.5727
ENSG00000100304.13	protein_coding	TTLL12	2	OTTHUMG00000150682.4	chr22	HAVANA	gene	43166622	43187134	-	-1.54295	6.55168	-33.7104	3.05989e-16	1.71985e-14	27.5567
ENSG00000012048.25	protein_coding	BRCA1	2	OTTHUMG00000157426.16	chr17	HAVANA	gene	43044295	43170245	-	-1.82216	6.4194	-33.6067	3.2117e-16	1.78097e-14	27.5217
ENSG00000176092.17	protein_coding	CRYBG2	1	OTTHUMG00000003490.10	chr1	HAVANA	gene	26321698	26360080	-	1.98154	5.61379	33.4553	3.44813e-16	1.88892e-14	27.4962
ENSG00000156970.13	protein_coding	BUB1B	2	OTTHUMG00000129877.4	chr15	HAVANA	gene	40161023	40221123	+	-2.3357	5.26462	-33.4453	3.46435e-16	1.88892e-14	27.4883
ENSG00000110107.9	protein_coding	PRPF19	1	OTTHUMG00000167798.3	chr11	HAVANA	gene	60890547	60906585	-	-1.36193	7.41984	-33.7035	3.06983e-16	1.71985e-14	27.474
ENSG00000197712.12	protein_coding	FAM114A1	2	OTTHUMG00000128583.5	chr4	HAVANA	gene	38867677	38945739	+	2.1063	5.62993	33.351	3.62149e-16	1.94855e-14	27.4474
ENSG00000112972.15	protein_coding	HMGCS1	2	OTTHUMG00000162231.3	chr5	HAVANA	gene	43287470	43313512	-	1.96824	6.92431	33.4807	3.40713e-16	1.87657e-14	27.4315
ENSG00000115129.14	protein_coding	TP53I3	2	OTTHUMG00000090817.4	chr2	HAVANA	gene	24077433	24085861	-	2.53571	5.53773	33.2501	3.79826e-16	2.02363e-14	27.3985
ENSG00000162366.8	protein_coding	PDZK1IP1	2	OTTHUMG00000007852.4	chr1	HAVANA	gene	47183582	47191044	-	4.13092	4.37451	34.3314	2.29627e-16	1.36131e-14	27.3856
ENSG00000120802.14	protein_coding	TMPO	1	OTTHUMG00000170210.4	chr12	HAVANA	gene	98515579	98550351	+	-1.84849	7.15962	-33.4463	3.46261e-16	1.88892e-14	27.3807
ENSG00000165458.15	protein_coding	INPPL1	1	OTTHUMG00000167879.4	chr11	HAVANA	gene	72223701	72239147	+	1.52233	8.43057	33.5563	3.2884e-16	1.81732e-14	27.3075
ENSG00000166888.12	protein_coding	STAT6	1	OTTHUMG00000171194.8	chr12	HAVANA	gene	57095408	57132139	-	1.33693	8.03469	33.4311	3.48748e-16	1.88892e-14	27.2859
ENSG00000086062.13	protein_coding	B4GALT1	2	OTTHUMG00000019764.1	chr9	HAVANA	gene	33104082	33167356	-	1.50298	7.16558	33.2159	3.86019e-16	2.04993e-14	27.2705
ENSG00000170312.17	protein_coding	CDK1	2	OTTHUMG00000018290.6	chr10	HAVANA	gene	60778331	60794852	+	-2.16782	6.13935	-33.02	4.23613e-16	2.18549e-14	27.2649
ENSG00000175792.12	protein_coding	RUVBL1	1	OTTHUMG00000159658.4	chr3	HAVANA	gene	128064778	128153914	-	-1.50336	7.0152	-33.1825	3.92164e-16	2.0758e-14	27.2607
ENSG00000070540.13	protein_coding	WIPI1	2	OTTHUMG00000179873.3	chr17	HAVANA	gene	68420948	68457513	-	2.61035	4.95441	33.0386	4.19882e-16	2.18004e-14	27.2566
ENSG00000066279.19	protein_coding	ASPM	2	OTTHUMG00000036277.2	chr1	HAVANA	gene	197084121	197146694	-	-2.16842	6.92046	-33.1191	4.04126e-16	2.11848e-14	27.2501
ENSG00000184220.12	protein_coding	CMSS1	1	OTTHUMG00000159054.4	chr3	HAVANA	gene	99817837	100181732	+	-2.62457	4.92209	-32.9707	4.33681e-16	2.22336e-14	27.2403
ENSG00000281398.4	lncRNA	SNHG4	2	OTTHUMG00000189582.3	chr5	HAVANA	gene	139274102	139284899	+	-2.22332	5.43692	-32.8906	4.50589e-16	2.29493e-14	27.2294
ENSG00000006634.8	protein_coding	DBF4	2	OTTHUMG00000131034.7	chr7	HAVANA	gene	87876216	87909553	+	-2.38587	5.46836	-32.8847	4.51862e-16	2.29493e-14	27.2267
ENSG00000105976.16	protein_coding	MET	1	OTTHUMG00000023299.10	chr7	HAVANA	gene	116672196	116798377	+	-1.3297	8.67353	-33.4355	3.48029e-16	1.88892e-14	27.2121
ENSG00000090621.15	protein_coding	PABPC4	1	OTTHUMG00000009097.7	chr1	HAVANA	gene	39560709	39576790	-	-1.16416	8.18684	-33.2825	3.74051e-16	2.00597e-14	27.1889
ENSG00000237649.8	protein_coding	KIFC1	2	OTTHUMG00000031209.5	chr6	HAVANA	gene	33391823	33409896	+	-1.83518	5.90455	-32.7874	4.73398e-16	2.38204e-14	27.1611
ENSG00000162377.6	protein_coding	COA7	2	OTTHUMG00000008505.4	chr1	HAVANA	gene	52684449	52698347	-	-1.84753	5.78378	-32.7661	4.78236e-16	2.39898e-14	27.1572
ENSG00000169908.12	protein_coding	TM4SF1	2	OTTHUMG00000159597.2	chr3	HAVANA	gene	149369022	149377692	-	1.66736	7.63751	33.0632	4.15e-16	2.16158e-14	27.1518
ENSG00000198712.1	protein_coding	MT-CO2	3	NA	chrM	ENSEMBL	gene	7586	8269	+	1.01073	12.0187	34.2268	2.40918e-16	1.40777e-14	27.1488
ENSG00000125398.8	protein_coding	SOX9	2	OTTHUMG00000166300.3	chr17	HAVANA	gene	72121020	72126416	+	-2.51027	4.92746	-32.7456	4.82975e-16	2.40793e-14	27.139
ENSG00000100401.21	protein_coding	RANGAP1	2	OTTHUMG00000150940.12	chr22	HAVANA	gene	41244779	41286187	-	-1.21449	7.73595	-33.0814	4.11422e-16	2.14981e-14	27.1379
ENSG00000125630.16	protein_coding	POLR1B	1	OTTHUMG00000131314.5	chr2	HAVANA	gene	112541915	112579818	+	-1.70611	6.05005	-32.7563	4.80508e-16	2.40298e-14	27.1353
ENSG00000129353.15	protein_coding	SLC44A2	1	OTTHUMG00000180585.4	chr19	HAVANA	gene	10602457	10644557	+	1.31391	7.68897	33.0319	4.21225e-16	2.18007e-14	27.1254
ENSG00000162607.13	protein_coding	USP1	2	OTTHUMG00000008972.5	chr1	HAVANA	gene	62436297	62451804	+	-2.00868	6.85918	-32.796	4.71432e-16	2.37949e-14	27.0942
ENSG00000196305.19	protein_coding	IARS1	1	OTTHUMG00000020219.3	chr9	HAVANA	gene	92210207	92293854	-	-1.19304	8.53117	-33.1546	3.97388e-16	2.09664e-14	27.0883
ENSG00000002834.19	protein_coding	LASP1	1	OTTHUMG00000133182.8	chr17	HAVANA	gene	38869859	38921770	+	0.982784	9.59771	33.3995	3.53971e-16	1.91086e-14	27.0865
ENSG00000025708.14	protein_coding	TYMP	1	OTTHUMG00000150249.3	chr22	HAVANA	gene	50525752	50530032	-	3.46147	4.40422	33.1231	4.03374e-16	2.11848e-14	27.0598
ENSG00000112312.10	protein_coding	GMNN	2	OTTHUMG00000014363.5	chr6	HAVANA	gene	24774931	24786099	+	-2.26288	5.15813	-32.4792	5.4909e-16	2.66423e-14	27.0294
ENSG00000167535.8	protein_coding	CACNB3	1	OTTHUMG00000170398.3	chr12	HAVANA	gene	48813794	48828941	+	2.95328	4.99101	32.549	5.30886e-16	2.59911e-14	27.0174
ENSG00000169607.13	protein_coding	CKAP2L	2	OTTHUMG00000131313.3	chr2	HAVANA	gene	112736349	112764664	-	-2.21911	5.48494	-32.4313	5.61982e-16	2.70265e-14	27.0078
ENSG00000181026.15	protein_coding	AEN	2	OTTHUMG00000148681.7	chr15	HAVANA	gene	88621337	88632281	+	-2.16055	5.12004	-32.413	5.66983e-16	2.71868e-14	26.9974
ENSG00000111057.11	protein_coding	KRT18	2	OTTHUMG00000169882.3	chr12	HAVANA	gene	52948871	52952906	+	-0.873465	9.77782	-33.2661	3.76965e-16	2.01497e-14	26.9933
ENSG00000163938.17	protein_coding	GNL3	2	OTTHUMG00000158752.4	chr3	HAVANA	gene	52681156	52694497	+	-1.40208	6.93911	-32.622	5.12532e-16	2.53206e-14	26.9905
ENSG00000049541.11	protein_coding	RFC2	2	OTTHUMG00000023239.8	chr7	HAVANA	gene	74231499	74254458	-	-1.90918	5.68934	-32.348	5.85132e-16	2.7893e-14	26.9583
ENSG00000105447.13	protein_coding	GRWD1	1	OTTHUMG00000183305.3	chr19	HAVANA	gene	48445841	48457022	+	-1.50307	6.4529	-32.4621	5.53671e-16	2.67056e-14	26.9566
ENSG00000198176.13	protein_coding	TFDP1	2	OTTHUMG00000017388.7	chr13	HAVANA	gene	113584721	113641473	+	-1.40963	6.98054	-32.5324	5.35176e-16	2.61227e-14	26.942
ENSG00000197746.15	protein_coding	PSAP	2	OTTHUMG00000018429.6	chr10	HAVANA	gene	71816298	71851251	-	0.9862	9.07333	32.9256	4.43102e-16	2.26454e-14	26.915
ENSG00000121152.10	protein_coding	NCAPH	1	OTTHUMG00000130451.6	chr2	HAVANA	gene	96335766	96377091	+	-2.46561	5.0059	-32.2529	6.12827e-16	2.87923e-14	26.9117
ENSG00000129422.15	protein_coding	MTUS1	1	OTTHUMG00000163756.5	chr8	HAVANA	gene	17643795	17801094	-	1.70638	6.14278	32.2969	5.99853e-16	2.83734e-14	26.9111
ENSG00000132382.15	protein_coding	MYBBP1A	2	OTTHUMG00000090747.3	chr17	HAVANA	gene	4538897	4555386	-	-1.46161	6.98584	-32.463	5.53431e-16	2.67056e-14	26.9077
ENSG00000176170.14	protein_coding	SPHK1	2	OTTHUMG00000180177.2	chr17	HAVANA	gene	76376584	76387860	+	-2.56329	4.89796	-32.2107	6.25572e-16	2.91391e-14	26.882
ENSG00000145220.14	protein_coding	LYAR	2	OTTHUMG00000125477.20	chr4	HAVANA	gene	4267701	4290154	-	-3.08692	4.35512	-32.4842	5.47779e-16	2.66423e-14	26.8796
ENSG00000115738.10	protein_coding	ID2	2	OTTHUMG00000112454.5	chr2	HAVANA	gene	8678845	8684461	+	3.16051	5.39556	32.1763	6.36153e-16	2.94637e-14	26.8732
ENSG00000108424.11	protein_coding	KPNB1	1	OTTHUMG00000036957.5	chr17	HAVANA	gene	47649476	47685505	+	-0.994876	9.73929	-32.992	4.29301e-16	2.20785e-14	26.8625
ENSG00000254166.4	lncRNA	CASC19	2	OTTHUMG00000165065.19	chr8	HAVANA	gene	127072694	127227541	-	-5.35843	3.9072	-34.7939	1.86032e-16	1.15319e-14	26.8458
ENSG00000100714.18	protein_coding	MTHFD1	1	OTTHUMG00000141309.15	chr14	HAVANA	gene	64388031	64463457	+	-1.30915	8.48001	-32.6485	5.06038e-16	2.50758e-14	26.8431
ENSG00000163918.12	protein_coding	RFC4	2	OTTHUMG00000156515.8	chr3	HAVANA	gene	186789880	186807058	-	-2.16514	5.14868	-32.0813	6.66401e-16	3.05178e-14	26.8376
ENSG00000160208.13	protein_coding	RRP1B	2	OTTHUMG00000086872.4	chr21	HAVANA	gene	43659560	43696079	+	-1.50286	6.76223	-32.2681	6.08317e-16	2.8663e-14	26.832
ENSG00000131981.16	protein_coding	LGALS3	1	OTTHUMG00000171030.5	chr14	HAVANA	gene	55124110	55145423	+	1.26338	7.582	32.3787	5.76506e-16	2.75624e-14	26.8101
ENSG00000127954.13	protein_coding	STEAP4	2	OTTHUMG00000153853.7	chr7	HAVANA	gene	88270892	88306894	-	3.75979	4.89361	32.1985	6.29296e-16	2.92291e-14	26.7675
ENSG00000170779.11	protein_coding	CDCA4	2	OTTHUMG00000170767.2	chr14	HAVANA	gene	105009573	105021083	-	-1.81891	5.64068	-31.9486	7.11187e-16	3.23868e-14	26.7624
ENSG00000138771.16	protein_coding	SHROOM3	1	OTTHUMG00000157075.4	chr4	HAVANA	gene	76435229	76783253	+	1.28872	7.72751	32.3118	5.95525e-16	2.83057e-14	26.7616
ENSG00000154380.19	protein_coding	ENAH	1	OTTHUMG00000037742.10	chr1	HAVANA	gene	225486765	225653142	-	1.53309	7.68456	32.2949	6.00431e-16	2.83734e-14	26.7615
ENSG00000163507.15	protein_coding	CIP2A	2	OTTHUMG00000159233.3	chr3	HAVANA	gene	108549864	108589644	-	-2.13885	5.86216	-31.9427	7.13278e-16	3.23916e-14	26.7523
ENSG00000164733.23	protein_coding	CTSB	1	OTTHUMG00000090799.10	chr8	HAVANA	gene	11842524	11869533	-	1.26589	7.36623	32.2167	6.23739e-16	2.9137e-14	26.7507
ENSG00000117650.13	protein_coding	NEK2	2	OTTHUMG00000037121.3	chr1	HAVANA	gene	211658657	211675630	-	-2.33321	5.08667	-31.8927	7.31025e-16	3.30136e-14	26.743
ENSG00000173156.7	protein_coding	RHOD	1	OTTHUMG00000167102.5	chr11	HAVANA	gene	67056847	67072017	+	1.50508	6.55832	32.0259	6.84725e-16	3.12691e-14	26.738
ENSG00000142731.11	protein_coding	PLK4	1	OTTHUMG00000133301.7	chr4	HAVANA	gene	127880893	127899224	+	-2.31904	4.85918	-31.8809	7.35291e-16	3.30792e-14	26.7262
ENSG00000101187.16	protein_coding	SLCO4A1	2	OTTHUMG00000032923.5	chr20	HAVANA	gene	62642503	62685785	+	-2.75168	4.94973	-31.8775	7.36536e-16	3.30792e-14	26.7212
ENSG00000197694.19	protein_coding	SPTAN1	2	OTTHUMG00000020754.14	chr9	HAVANA	gene	128552558	128633662	+	1.34648	9.22301	32.5609	5.27859e-16	2.59911e-14	26.7184
ENSG00000005022.6	protein_coding	SLC25A5	2	OTTHUMG00000022715.3	chrX	HAVANA	gene	119468422	119471396	+	-0.942504	9.10805	-32.5495	5.3077e-16	2.59911e-14	26.7171
ENSG00000101412.13	protein_coding	E2F1	2	OTTHUMG00000032265.3	chr20	HAVANA	gene	33675477	33686385	-	-2.07159	5.52207	-31.8227	7.56701e-16	3.36144e-14	26.7071
ENSG00000026508.21	protein_coding	CD44	1	OTTHUMG00000044388.10	chr11	HAVANA	gene	35138882	35232402	+	-0.968116	10.4175	-32.8593	4.57369e-16	2.31568e-14	26.7063
ENSG00000117143.14	protein_coding	UAP1	2	OTTHUMG00000034419.4	chr1	HAVANA	gene	162561722	162601240	+	-1.49311	7.39762	-32.1051	6.58685e-16	3.02494e-14	26.6872
ENSG00000019144.20	protein_coding	PHLDB1	2	OTTHUMG00000166341.9	chr11	HAVANA	gene	118606440	118658031	+	1.73869	5.96318	31.8049	7.63362e-16	3.37836e-14	26.6785
ENSG00000006451.8	protein_coding	RALA	2	OTTHUMG00000128775.5	chr7	HAVANA	gene	39623565	39708120	+	1.66936	8.31025	32.2464	6.1479e-16	2.88015e-14	26.6714
ENSG00000111445.14	protein_coding	RFC5	2	OTTHUMG00000156438.5	chr12	HAVANA	gene	118013588	118033130	+	-2.14074	5.07042	-31.7432	7.86974e-16	3.45823e-14	26.671
ENSG00000276116.2	lncRNA	FUT8-AS1	2	OTTHUMG00000186893.2	chr14	HAVANA	gene	65411170	65412690	-	4.26767	4.34398	32.6709	5.00617e-16	2.48828e-14	26.6511
ENSG00000090889.12	protein_coding	KIF4A	2	OTTHUMG00000021775.2	chrX	HAVANA	gene	70290104	70420886	+	-2.17925	5.87047	-31.7089	8.00465e-16	3.49866e-14	26.6355
ENSG00000111247.15	protein_coding	RAD51AP1	1	OTTHUMG00000168125.5	chr12	HAVANA	gene	4538798	4560047	+	-2.4728	4.64723	-31.7346	7.9033e-16	3.46364e-14	26.6313
ENSG00000010278.15	protein_coding	CD9	1	OTTHUMG00000044400.14	chr12	HAVANA	gene	6199715	6238271	+	1.16752	8.00812	32.1112	6.56718e-16	3.02443e-14	26.628
ENSG00000135476.12	protein_coding	ESPL1	2	OTTHUMG00000169674.6	chr12	HAVANA	gene	53268299	53293638	+	-2.24925	5.12969	-31.605	8.42793e-16	3.64458e-14	26.6035
ENSG00000165895.19	protein_coding	ARHGAP42	2	OTTHUMG00000167530.6	chr11	HAVANA	gene	100687288	100993941	+	2.03572	6.68347	31.6636	8.18616e-16	3.56842e-14	26.5552
ENSG00000013563.14	protein_coding	DNASE1L1	1	OTTHUMG00000033188.30	chrX	HAVANA	gene	154401236	154412112	-	1.94645	5.54355	31.447	9.11762e-16	3.89857e-14	26.5221
ENSG00000177084.19	protein_coding	POLE	1	OTTHUMG00000168045.7	chr12	HAVANA	gene	132623753	132687376	-	-1.62406	6.23095	-31.5553	8.63832e-16	3.72567e-14	26.5217
ENSG00000174136.13	protein_coding	RGMB	2	OTTHUMG00000162745.3	chr5	HAVANA	gene	98768650	98798643	+	-1.49002	6.76892	-31.648	8.2496e-16	3.58649e-14	26.5173
ENSG00000082516.9	protein_coding	GEMIN5	2	OTTHUMG00000130189.3	chr5	HAVANA	gene	154887411	154938211	-	-1.9493	5.65086	-31.4432	9.13484e-16	3.89857e-14	26.5104
ENSG00000158710.15	protein_coding	TAGLN2	2	OTTHUMG00000022793.3	chr1	HAVANA	gene	159918107	159925507	-	1.03667	9.14284	32.1293	6.50927e-16	3.00625e-14	26.5047
ENSG00000172037.14	protein_coding	LAMB2	2	OTTHUMG00000156807.5	chr3	HAVANA	gene	49121114	49133118	-	2.22828	6.64486	31.5127	8.82375e-16	3.79561e-14	26.4872
ENSG00000065328.17	protein_coding	MCM10	2	OTTHUMG00000017694.3	chr10	HAVANA	gene	13161558	13211110	+	-3.39096	4.09365	-31.9053	7.26516e-16	3.29011e-14	26.4848
ENSG00000115241.11	protein_coding	PPM1G	2	OTTHUMG00000097788.3	chr2	HAVANA	gene	27381195	27409591	-	-1.23663	7.97803	-31.8015	7.64653e-16	3.37836e-14	26.468
ENSG00000183255.12	protein_coding	PTTG1IP	1	OTTHUMG00000090254.2	chr21	HAVANA	gene	44849585	44873903	-	1.03738	8.51887	31.8697	7.3937e-16	3.31153e-14	26.4453
ENSG00000178927.19	protein_coding	CYBC1	1	OTTHUMG00000178770.6	chr17	HAVANA	gene	82440912	82450829	-	1.70317	6.52023	31.4195	9.24329e-16	3.91411e-14	26.4379
ENSG00000170425.4	protein_coding	ADORA2B	2	OTTHUMG00000059140.2	chr17	HAVANA	gene	15945130	15975746	+	-2.97071	4.67232	-31.3083	9.77251e-16	4.07471e-14	26.4063
ENSG00000157613.11	protein_coding	CREB3L1	1	OTTHUMG00000166423.8	chr11	HAVANA	gene	46277662	46321409	+	2.99244	4.63172	31.3662	9.49305e-16	3.97854e-14	26.3953
ENSG00000109861.17	protein_coding	CTSC	2	OTTHUMG00000167290.4	chr11	HAVANA	gene	88265069	88359684	-	-1.08725	8.83773	-31.8457	7.48134e-16	3.3416e-14	26.3911
ENSG00000155561.15	protein_coding	NUP205	1	OTTHUMG00000155497.5	chr7	HAVANA	gene	135557917	135648757	+	-1.41395	7.23698	-31.4368	9.16392e-16	3.90077e-14	26.3605
ENSG00000134369.16	protein_coding	NAV1	1	OTTHUMG00000035766.7	chr1	HAVANA	gene	201539127	201826969	+	2.265	5.9835	31.152	1.05706e-15	4.34792e-14	26.3567
ENSG00000145730.21	protein_coding	PAM	1	OTTHUMG00000128729.5	chr5	HAVANA	gene	102753981	103029730	+	1.39418	7.36124	31.4283	9.20299e-16	3.9072e-14	26.3503
ENSG00000134222.16	protein_coding	PSRC1	2	OTTHUMG00000012000.6	chr1	HAVANA	gene	109279556	109283186	-	-2.37357	4.75593	-31.1089	1.08028e-15	4.41514e-14	26.3399
ENSG00000147955.18	protein_coding	SIGMAR1	2	OTTHUMG00000019829.5	chr9	HAVANA	gene	34634722	34637844	-	-1.31173	7.10401	-31.3454	9.59221e-16	4.00979e-14	26.3256
ENSG00000159131.17	protein_coding	GART	2	OTTHUMG00000065628.26	chr21	HAVANA	gene	33503931	33543491	-	-1.39697	7.00284	-31.294	9.84279e-16	4.09355e-14	26.3103
ENSG00000132436.13	protein_coding	FIGNL1	2	OTTHUMG00000022866.5	chr7	HAVANA	gene	50444128	50450390	-	-2.15041	5.07409	-31.0063	1.1377e-15	4.60246e-14	26.3046
ENSG00000044574.9	protein_coding	HSPA5	2	OTTHUMG00000020672.2	chr9	HAVANA	gene	125234853	125241382	-	0.973662	9.7161	31.7826	7.7182e-16	3.4008e-14	26.2537
ENSG00000175166.17	protein_coding	PSMD2	1	OTTHUMG00000156796.5	chr3	HAVANA	gene	184299198	184309050	+	-1.04403	9.90279	-31.8349	7.52139e-16	3.35031e-14	26.253
ENSG00000197771.13	protein_coding	MCMBP	2	OTTHUMG00000019159.4	chr10	HAVANA	gene	119829404	119892556	-	-1.38235	6.90808	-31.1488	1.05878e-15	4.34792e-14	26.2443
ENSG00000138095.20	protein_coding	LRPPRC	1	OTTHUMG00000152782.12	chr2	HAVANA	gene	43886224	43996226	-	-1.18386	8.11379	-31.3805	9.4253e-16	3.96033e-14	26.2344
ENSG00000101311.17	protein_coding	FERMT1	2	OTTHUMG00000031826.4	chr20	HAVANA	gene	6074845	6123214	-	-1.7428	6.06954	-30.9488	1.17135e-15	4.70358e-14	26.2258
ENSG00000062038.15	protein_coding	CDH3	2	OTTHUMG00000137560.8	chr16	HAVANA	gene	68636189	68727468	+	1.38024	6.80512	31.0499	1.11295e-15	4.52859e-14	26.2116
ENSG00000100749.9	protein_coding	VRK1	2	OTTHUMG00000171459.2	chr14	HAVANA	gene	96797304	96954846	+	-2.39049	5.23465	-30.8218	1.2494e-15	4.93196e-14	26.2115
ENSG00000143179.16	protein_coding	UCK2	2	OTTHUMG00000040117.4	chr1	HAVANA	gene	165827614	165911618	+	-1.57954	6.12749	-30.914	1.19222e-15	4.75224e-14	26.1999
ENSG00000113569.16	protein_coding	NUP155	2	OTTHUMG00000090803.4	chr5	HAVANA	gene	37288137	37371106	-	-1.57865	6.55095	-30.9853	1.14987e-15	4.64019e-14	26.198
ENSG00000100941.9	protein_coding	PNN	2	OTTHUMG00000028821.6	chr14	HAVANA	gene	39175183	39183220	+	-1.49442	6.91392	-31.0482	1.11388e-15	4.52859e-14	26.1929
ENSG00000138180.16	protein_coding	CEP55	2	OTTHUMG00000018774.2	chr10	HAVANA	gene	93496612	93529092	+	-1.81233	6.57514	-30.9714	1.15801e-15	4.66151e-14	26.1928
ENSG00000114346.14	protein_coding	ECT2	1	OTTHUMG00000156762.6	chr3	HAVANA	gene	172750682	172821474	+	-1.69546	7.36532	-31.1084	1.08056e-15	4.41514e-14	26.1803
ENSG00000125835.20	protein_coding	SNRPB	2	OTTHUMG00000031694.4	chr20	HAVANA	gene	2461634	2470853	-	-1.16581	7.581	-31.1496	1.05834e-15	4.34792e-14	26.1723
ENSG00000160211.20	protein_coding	G6PD	1	OTTHUMG00000024237.13	chrX	HAVANA	gene	154517825	154547572	-	0.981135	8.87964	31.3812	9.42215e-16	3.96033e-14	26.1487
ENSG00000116120.11	protein_coding	FARSB	2	OTTHUMG00000133155.4	chr2	HAVANA	gene	222566899	222656092	-	-1.46918	6.79205	-30.9225	1.18706e-15	4.74329e-14	26.1393
ENSG00000128951.14	protein_coding	DUT	1	OTTHUMG00000172155.4	chr15	HAVANA	gene	48331011	48343373	+	-2.01947	5.18332	-30.6569	1.35902e-15	5.30049e-14	26.1268
ENSG00000092841.19	protein_coding	MYL6	2	OTTHUMG00000170200.7	chr12	HAVANA	gene	56158346	56163496	+	1.02913	9.52132	31.4856	8.94348e-16	3.83699e-14	26.1245
ENSG00000144554.13	protein_coding	FANCD2	2	OTTHUMG00000128670.3	chr3	HAVANA	gene	10026370	10101932	+	-2.46944	4.46158	-30.7293	1.30966e-15	5.13976e-14	26.1178
ENSG00000122566.22	protein_coding	HNRNPA2B1	2	OTTHUMG00000023471.4	chr7	HAVANA	gene	26171151	26201529	-	-1.00222	10.1668	-31.6127	8.39542e-16	3.64017e-14	26.102
ENSG00000122140.13	protein_coding	MRPS2	2	OTTHUMG00000020910.4	chr9	HAVANA	gene	135499984	135504673	+	-1.50716	6.16607	-30.7266	1.3115e-15	5.13976e-14	26.0977
ENSG00000163781.14	protein_coding	TOPBP1	1	OTTHUMG00000159773.7	chr3	HAVANA	gene	133598175	133662380	-	-1.39699	6.9423	-30.8578	1.22673e-15	4.85611e-14	26.0887
ENSG00000158373.9	protein_coding	H2BC5	2	OTTHUMG00000014426.1	chr6	HAVANA	gene	26158122	26171349	+	3.3333	4.09588	31.184	1.04019e-15	4.30412e-14	26.0854
ENSG00000052344.16	protein_coding	PRSS8	1	OTTHUMG00000176750.5	chr16	HAVANA	gene	31131433	31135727	-	1.68062	5.77433	30.5419	1.44151e-15	5.59546e-14	26.0439
ENSG00000165244.7	protein_coding	ZNF367	2	OTTHUMG00000020295.2	chr9	HAVANA	gene	96385941	96418370	-	-2.82414	4.16573	-30.7213	1.31505e-15	5.14133e-14	26.0306
ENSG00000123240.17	protein_coding	OPTN	2	OTTHUMG00000017690.6	chr10	HAVANA	gene	13099449	13138308	+	1.43141	7.1522	30.7709	1.28217e-15	5.0491e-14	26.0298
ENSG00000138035.15	protein_coding	PNPT1	2	OTTHUMG00000129335.8	chr2	HAVANA	gene	55634061	55693863	-	-1.61653	5.81455	-30.517	1.46006e-15	5.654e-14	26.0189
ENSG00000136848.19	protein_coding	DAB2IP	2	OTTHUMG00000020595.5	chr9	HAVANA	gene	121567057	121785530	+	1.92402	5.51245	30.3768	1.5694e-15	6.00609e-14	25.976
ENSG00000143079.15	protein_coding	CTTNBP2NL	2	OTTHUMG00000011154.5	chr1	HAVANA	gene	112396214	112463456	+	1.79411	6.08454	30.4262	1.52994e-15	5.86883e-14	25.9626
ENSG00000132003.10	protein_coding	ZSWIM4	2	OTTHUMG00000181752.2	chr19	HAVANA	gene	13795443	13832254	+	2.2838	4.79641	30.3643	1.57952e-15	6.03065e-14	25.9608
ENSG00000024526.17	protein_coding	DEPDC1	2	OTTHUMG00000009212.5	chr1	HAVANA	gene	68474152	68497221	-	-2.47274	6.26652	-30.4275	1.52884e-15	5.86883e-14	25.9525
ENSG00000181789.14	protein_coding	COPG1	2	OTTHUMG00000159451.5	chr3	HAVANA	gene	129249606	129277773	+	1.02269	8.55366	30.8799	1.21303e-15	4.8234e-14	25.9238
ENSG00000121895.8	protein_coding	TMEM156	1	OTTHUMG00000128582.5	chr4	HAVANA	gene	38966744	39032922	-	-3.12909	4.27043	-30.4805	1.48775e-15	5.74756e-14	25.9119
ENSG00000138119.17	protein_coding	MYOF	2	OTTHUMG00000018772.6	chr10	HAVANA	gene	93306429	93482334	-	1.20593	9.38628	31.0344	1.12167e-15	4.54889e-14	25.9062
ENSG00000142864.15	protein_coding	SERBP1	2	OTTHUMG00000009372.3	chr1	HAVANA	gene	67407810	67430415	-	-1.25617	8.69029	-30.857	1.22721e-15	4.85611e-14	25.8925
ENSG00000198786.2	protein_coding	MT-ND5	3	NA	chrM	ENSEMBL	gene	12337	14148	+	1.32505	10.5027	31.2716	9.95386e-16	4.12921e-14	25.8851
ENSG00000169813.17	protein_coding	HNRNPF	2	OTTHUMG00000018029.3	chr10	HAVANA	gene	43385617	43409186	-	-1.13956	8.22522	-30.6495	1.36418e-15	5.30792e-14	25.8354
ENSG00000135763.10	protein_coding	URB2	2	OTTHUMG00000039464.3	chr1	HAVANA	gene	229626247	229660200	+	-2.22689	5.07271	-30.0754	1.83486e-15	6.84525e-14	25.828
ENSG00000125966.10	protein_coding	MMP24	2	OTTHUMG00000032330.6	chr20	HAVANA	gene	35226690	35276998	+	2.82264	4.98323	30.101	1.8106e-15	6.78954e-14	25.8254
ENSG00000168078.10	protein_coding	PBK	1	OTTHUMG00000102113.6	chr8	HAVANA	gene	27809624	27838082	-	-2.55842	4.7394	-30.0452	1.86394e-15	6.92205e-14	25.799
ENSG00000051341.15	protein_coding	POLQ	2	OTTHUMG00000159396.2	chr3	HAVANA	gene	121431431	121545988	-	-2.37446	4.66965	-30.0382	1.87082e-15	6.93183e-14	25.7947
ENSG00000277161.2	protein_coding	PIGW	2	OTTHUMG00000188438.4	chr17	HAVANA	gene	36534987	36539310	+	-1.83535	5.61162	-30.0471	1.86218e-15	6.92205e-14	25.7891
ENSG00000177494.6	protein_coding	ZBED2	2	OTTHUMG00000074061.3	chr3	HAVANA	gene	111592900	111595346	-	2.1728	5.33916	29.9967	1.91179e-15	7.02835e-14	25.7853
ENSG00000181467.5	protein_coding	RAP2B	2	OTTHUMG00000159655.3	chr3	HAVANA	gene	153162226	153170627	+	1.4763	6.61905	30.195	1.72423e-15	6.52207e-14	25.7814
ENSG00000143641.10	protein_coding	GALNT2	2	OTTHUMG00000037771.2	chr1	HAVANA	gene	230057990	230282122	+	1.32432	7.42799	30.3413	1.59839e-15	6.08844e-14	25.769
ENSG00000048162.22	protein_coding	NOP16	1	OTTHUMG00000163186.5	chr5	HAVANA	gene	176383946	176388927	-	-1.77759	5.54448	-29.9887	1.91973e-15	7.02835e-14	25.7618
ENSG00000177628.16	protein_coding	GBA1	2	OTTHUMG00000035841.3	chr1	HAVANA	gene	155234452	155244699	-	1.40561	6.4291	30.1127	1.7996e-15	6.7757e-14	25.7552
ENSG00000085840.13	protein_coding	ORC1	2	OTTHUMG00000008104.5	chr1	HAVANA	gene	52372829	52404423	-	-2.47485	4.44261	-30.0046	1.90386e-15	7.02835e-14	25.7524
ENSG00000198246.10	protein_coding	SLC29A3	2	OTTHUMG00000018424.7	chr10	HAVANA	gene	71319259	71381423	+	3.08416	4.47929	30.0866	1.82414e-15	6.82087e-14	25.7275
ENSG00000107819.15	protein_coding	SFXN3	2	OTTHUMG00000018921.5	chr10	HAVANA	gene	101031234	101041241	+	1.84161	5.99098	29.9431	1.9661e-15	7.13371e-14	25.7153
ENSG00000096063.16	protein_coding	SRPK1	1	OTTHUMG00000014583.7	chr6	HAVANA	gene	35832966	35921342	-	-1.22121	7.40258	-30.1642	1.75199e-15	6.61173e-14	25.6683
ENSG00000177788.7	lncRNA	RAB4A-AS1	2	OTTHUMG00000037660.2	chr1	HAVANA	gene	229256892	229271242	-	-1.98366	5.0649	-29.7581	2.16661e-15	7.69546e-14	25.6613
ENSG00000176845.13	protein_coding	METRNL	2	OTTHUMG00000177771.3	chr17	HAVANA	gene	83079609	83095122	+	1.83496	5.74991	29.7686	2.15466e-15	7.66976e-14	25.6404
ENSG00000260604.3	lncRNA	ENSG00000260604	2	OTTHUMG00000175886.3	chr6	HAVANA	gene	3904920	3912072	-	5.11323	4.08452	31.4065	9.30352e-16	3.92941e-14	25.634
ENSG00000101003.12	protein_coding	GINS1	2	OTTHUMG00000032124.2	chr20	HAVANA	gene	25391008	25452700	+	-2.57154	4.78318	-29.7157	2.21558e-15	7.80141e-14	25.6313
ENSG00000115541.11	protein_coding	HSPE1	1	OTTHUMG00000132749.3	chr2	HAVANA	gene	197500140	197503449	+	-1.68182	5.75629	-29.7444	2.18226e-15	7.73421e-14	25.6148
ENSG00000148840.11	protein_coding	PPRC1	2	OTTHUMG00000018948.2	chr10	HAVANA	gene	102132994	102150333	+	-1.40465	6.78206	-29.936	1.97344e-15	7.13371e-14	25.614
ENSG00000164163.11	protein_coding	ABCE1	2	OTTHUMG00000161478.4	chr4	HAVANA	gene	145098288	145129524	+	-1.77838	7.08983	-29.9858	1.92274e-15	7.02835e-14	25.6139
ENSG00000183684.8	protein_coding	ALYREF	2	OTTHUMG00000160470.3	chr17	HAVANA	gene	81887835	81891586	-	-1.65094	6.66476	-29.8965	2.01464e-15	7.25969e-14	25.6095
ENSG00000139514.13	protein_coding	SLC7A1	2	OTTHUMG00000016658.6	chr13	HAVANA	gene	29509414	29595688	-	-1.24805	7.12007	-29.9873	1.92118e-15	7.02835e-14	25.6034
ENSG00000196352.18	protein_coding	CD55	1	OTTHUMG00000036255.7	chr1	HAVANA	gene	207321519	207386804	+	1.19194	7.3813	29.9968	1.91172e-15	7.02835e-14	25.586
ENSG00000188229.6	protein_coding	TUBB4B	2	OTTHUMG00000131783.3	chr9	HAVANA	gene	137241287	137243707	+	-0.855959	9.57144	-30.4455	1.51474e-15	5.83801e-14	25.5595
ENSG00000128944.14	protein_coding	KNSTRN	2	OTTHUMG00000172454.3	chr15	HAVANA	gene	40382721	40394288	+	-2.06805	5.34797	-29.5557	2.41099e-15	8.39881e-14	25.546
ENSG00000204580.14	protein_coding	DDR1	1	OTTHUMG00000031236.13	chr6	HAVANA	gene	30876421	30900156	+	1.34389	7.5029	29.9393	1.97003e-15	7.13371e-14	25.5438
ENSG00000226950.8	lncRNA	DANCR	2	OTTHUMG00000154670.4	chr4	HAVANA	gene	52712325	52723623	+	-1.23314	7.09048	-29.8655	2.04771e-15	7.3371e-14	25.5402
ENSG00000116717.13	protein_coding	GADD45A	2	OTTHUMG00000009374.5	chr1	HAVANA	gene	67685201	67688334	+	1.49416	6.48737	29.7027	2.23071e-15	7.83777e-14	25.5304
ENSG00000075218.19	protein_coding	GTSE1	2	OTTHUMG00000150486.4	chr22	HAVANA	gene	46296870	46330810	+	-1.9622	5.3737	-29.4994	2.48417e-15	8.6118e-14	25.5131
ENSG00000171208.10	protein_coding	NETO2	1	OTTHUMG00000133101.5	chr16	HAVANA	gene	47077703	47143945	-	-1.72194	6.00868	-29.5821	2.37752e-15	8.31773e-14	25.5064
ENSG00000159176.14	protein_coding	CSRP1	2	OTTHUMG00000035773.6	chr1	HAVANA	gene	201483530	201509456	-	1.12656	7.87535	29.9506	1.95842e-15	7.13371e-14	25.5041
ENSG00000128059.8	protein_coding	PPAT	2	OTTHUMG00000128842.2	chr4	HAVANA	gene	56393362	56435615	-	-2.03568	5.19578	-29.459	2.53797e-15	8.74768e-14	25.4998
ENSG00000180530.11	protein_coding	NRIP1	2	OTTHUMG00000074323.4	chr21	HAVANA	gene	14961235	15065936	-	-1.96451	5.7233	-29.5077	2.4732e-15	8.59716e-14	25.495
ENSG00000154473.18	protein_coding	BUB3	1	OTTHUMG00000019197.5	chr10	HAVANA	gene	123154402	123170467	+	-1.25834	7.65728	-29.8941	2.0172e-15	7.25969e-14	25.4938
ENSG00000150687.12	protein_coding	PRSS23	2	OTTHUMG00000167226.4	chr11	HAVANA	gene	86791059	86952910	+	1.26939	8.01124	29.946	1.9631e-15	7.13371e-14	25.4881
ENSG00000197324.9	protein_coding	LRP10	2	OTTHUMG00000028705.4	chr14	HAVANA	gene	22871740	22881713	+	1.14163	7.49619	29.8128	2.10512e-15	7.50978e-14	25.4722
ENSG00000175216.15	protein_coding	CKAP5	1	OTTHUMG00000166599.5	chr11	HAVANA	gene	46743048	46846308	-	-1.21769	8.82766	-30.0999	1.8116e-15	6.78954e-14	25.4677
ENSG00000173145.11	protein_coding	NOC3L	2	OTTHUMG00000018788.1	chr10	HAVANA	gene	94333226	94362959	-	-1.88645	5.86703	-29.4678	2.52616e-15	8.72542e-14	25.4602
ENSG00000107798.18	protein_coding	LIPA	2	OTTHUMG00000018716.4	chr10	HAVANA	gene	89213569	89414557	-	1.83397	8.06275	29.8745	2.03809e-15	7.31872e-14	25.4536
ENSG00000065150.21	protein_coding	IPO5	1	OTTHUMG00000017244.9	chr13	HAVANA	gene	97953658	98024296	+	-1.22367	7.67966	-29.8253	2.09132e-15	7.47694e-14	25.4533
ENSG00000278259.5	protein_coding	MYO19	2	OTTHUMG00000188437.2	chr17	HAVANA	gene	36495636	36543435	-	-1.35926	7.21756	-29.7173	2.21369e-15	7.80141e-14	25.447
ENSG00000148400.13	protein_coding	NOTCH1	2	OTTHUMG00000020935.3	chr9	HAVANA	gene	136494433	136546048	-	-2.20326	4.69879	-29.3236	2.72782e-15	9.28426e-14	25.4274
ENSG00000161011.20	protein_coding	SQSTM1	2	OTTHUMG00000150643.80	chr5	HAVANA	gene	179806398	179838078	+	0.813356	10.2413	30.3005	1.63249e-15	6.20383e-14	25.3946
ENSG00000135924.17	protein_coding	DNAJB2	1	OTTHUMG00000133134.22	chr2	HAVANA	gene	219279342	219286898	+	1.64066	6.49242	29.4367	2.56832e-15	8.83363e-14	25.3882
ENSG00000086712.13	protein_coding	TXLNG	2	OTTHUMG00000021196.2	chrX	HAVANA	gene	16786432	16844519	+	-1.70078	5.51895	-29.2844	2.78568e-15	9.46143e-14	25.3843
ENSG00000178401.16	protein_coding	DNAJC22	2	OTTHUMG00000169487.7	chr12	HAVANA	gene	49346888	49357546	+	2.40258	4.67265	29.2667	2.81211e-15	9.51159e-14	25.3823
ENSG00000096746.18	protein_coding	HNRNPH3	2	OTTHUMG00000018349.2	chr10	HAVANA	gene	68331174	68343193	+	-1.29628	7.30706	-29.5824	2.37717e-15	8.31773e-14	25.3624
ENSG00000198804.2	protein_coding	MT-CO1	3	NA	chrM	ENSEMBL	gene	5904	7445	+	0.73456	12.8641	30.9381	1.17773e-15	4.71756e-14	25.356
ENSG00000164134.14	protein_coding	NAA15	2	OTTHUMG00000137363.7	chr4	HAVANA	gene	139301446	139420033	+	-1.26583	7.3437	-29.562	2.40304e-15	8.38903e-14	25.3467
ENSG00000073536.18	protein_coding	NLE1	2	OTTHUMG00000132928.4	chr17	HAVANA	gene	35128730	35142304	-	-1.61121	5.92365	-29.2456	2.84398e-15	9.59945e-14	25.3285
ENSG00000132603.15	protein_coding	NIP7	2	OTTHUMG00000137568.8	chr16	HAVANA	gene	69337996	69343106	+	-1.57041	5.78638	-29.224	2.87709e-15	9.69116e-14	25.3281
ENSG00000122786.20	protein_coding	CALD1	2	OTTHUMG00000155407.10	chr7	HAVANA	gene	134744252	134970729	+	1.36622	6.95282	29.4305	2.57673e-15	8.84389e-14	25.3274
ENSG00000184574.10	protein_coding	LPAR5	2	OTTHUMG00000168713.2	chr12	HAVANA	gene	6618835	6635960	-	2.53179	4.82964	29.1179	3.04578e-15	1.01338e-13	25.3123
ENSG00000128641.19	protein_coding	MYO1B	1	OTTHUMG00000132718.11	chr2	HAVANA	gene	191245185	191425389	+	1.11045	8.60614	29.74	2.18729e-15	7.73524e-14	25.3019
ENSG00000174792.11	protein_coding	ODAPH	2	OTTHUMG00000130104.2	chr4	HAVANA	gene	75556048	75565871	+	3.61896	4.25976	29.4965	2.48798e-15	8.6118e-14	25.301
ENSG00000160949.18	protein_coding	TONSL	2	OTTHUMG00000153122.4	chr8	HAVANA	gene	144428775	144444440	-	-2.17237	5.33187	-29.09	3.09168e-15	1.02032e-13	25.2968
ENSG00000003989.18	protein_coding	SLC7A2	2	OTTHUMG00000130819.5	chr8	HAVANA	gene	17497088	17570573	+	-1.95288	5.02047	-29.0352	3.1844e-15	1.03964e-13	25.276
ENSG00000097046.13	protein_coding	CDC7	2	OTTHUMG00000047810.4	chr1	HAVANA	gene	91500851	91525764	+	-2.17286	4.93303	-28.9951	3.25398e-15	1.05466e-13	25.2563
ENSG00000166451.14	protein_coding	CENPN	2	OTTHUMG00000137628.2	chr16	HAVANA	gene	81006552	81033114	+	-1.86744	5.87076	-29.0849	3.10018e-15	1.02106e-13	25.2503
ENSG00000168961.17	protein_coding	LGALS9	1	OTTHUMG00000179831.21	chr17	HAVANA	gene	27629798	27649560	+	4.50074	3.87735	30.2941	1.6379e-15	6.20991e-14	25.2443
ENSG00000196363.10	protein_coding	WDR5	2	OTTHUMG00000131707.3	chr9	HAVANA	gene	134135365	134159968	+	-1.3992	6.29196	-29.1345	3.01871e-15	1.00642e-13	25.2269
ENSG00000164754.16	protein_coding	RAD21	1	OTTHUMG00000164959.4	chr8	HAVANA	gene	116845934	116874776	-	-1.35312	7.76276	-29.3857	2.63896e-15	9.01949e-14	25.2029
ENSG00000102890.16	protein_coding	ELMO3	1	OTTHUMG00000133570.5	chr16	HAVANA	gene	67199111	67204029	+	1.863	5.43426	28.9083	3.4103e-15	1.0946e-13	25.195
ENSG00000058668.16	protein_coding	ATP2B4	2	OTTHUMG00000035906.4	chr1	HAVANA	gene	203626832	203744081	+	3.15438	4.22967	29.1531	2.98863e-15	1.00035e-13	25.1908
ENSG00000196535.20	protein_coding	MYO18A	1	OTTHUMG00000166360.11	chr17	HAVANA	gene	29071122	29180398	-	1.45595	6.62161	29.1039	3.06868e-15	1.01572e-13	25.1859
ENSG00000124789.12	protein_coding	NUP153	2	OTTHUMG00000014312.1	chr6	HAVANA	gene	17615035	17706925	-	-1.39296	6.75208	-29.1499	2.99384e-15	1.00035e-13	25.1858
ENSG00000184371.14	protein_coding	CSF1	1	OTTHUMG00000011646.4	chr1	HAVANA	gene	109910242	109930992	+	-1.84788	5.2056	-28.8584	3.50373e-15	1.11131e-13	25.1725
ENSG00000261373.1	lncRNA	VPS9D1-AS1	2	OTTHUMG00000173220.1	chr16	HAVANA	gene	89711856	89718165	+	-2.16596	4.80849	-28.8301	3.55794e-15	1.12631e-13	25.1668
ENSG00000100196.11	protein_coding	KDELR3	2	OTTHUMG00000153520.2	chr22	HAVANA	gene	38468078	38483447	+	2.65328	4.5449	28.8818	3.45962e-15	1.10161e-13	25.1559
ENSG00000141753.7	protein_coding	IGFBP4	2	OTTHUMG00000133326.2	chr17	HAVANA	gene	40443450	40457725	+	-1.37204	6.44358	-29.0328	3.1885e-15	1.03964e-13	25.154
ENSG00000102034.18	protein_coding	ELF4	2	OTTHUMG00000022390.2	chrX	HAVANA	gene	130063955	130110716	-	1.09063	8.16799	29.3769	2.65139e-15	9.04302e-14	25.1531
ENSG00000115163.15	protein_coding	CENPA	2	OTTHUMG00000097073.5	chr2	HAVANA	gene	26764289	26801067	+	-2.20649	4.78251	-28.8022	3.61239e-15	1.14133e-13	25.1512
ENSG00000123975.5	protein_coding	CKS2	2	OTTHUMG00000020180.2	chr9	HAVANA	gene	89311195	89316703	+	-2.09049	6.13706	-28.8897	3.44489e-15	1.09906e-13	25.1223
ENSG00000169714.17	protein_coding	CNBP	1	OTTHUMG00000159943.4	chr3	HAVANA	gene	129167827	129183922	-	-1.24485	7.95216	-29.2744	2.80061e-15	9.49236e-14	25.1175
ENSG00000167670.16	protein_coding	CHAF1A	1	OTTHUMG00000181922.6	chr19	HAVANA	gene	4402640	4445018	+	-2.16271	5.60265	-28.7824	3.65141e-15	1.14921e-13	25.1115
ENSG00000126458.4	protein_coding	RRAS	2	OTTHUMG00000183247.2	chr19	HAVANA	gene	49635292	49640143	-	3.09154	4.62537	28.7958	3.62495e-15	1.14309e-13	25.0968
ENSG00000127399.15	protein_coding	LRRC61	2	OTTHUMG00000158326.2	chr7	HAVANA	gene	150323263	150338156	+	1.97806	5.36633	28.7139	3.79018e-15	1.18829e-13	25.0934
ENSG00000118640.11	protein_coding	VAMP8	1	OTTHUMG00000130180.5	chr2	HAVANA	gene	85561562	85582031	+	1.36749	6.63568	28.9372	3.3575e-15	1.08391e-13	25.0893
ENSG00000221926.13	protein_coding	TRIM16	1	OTTHUMG00000059067.8	chr17	HAVANA	gene	15627960	15684311	-	2.16386	5.28691	28.6748	3.87169e-15	1.20458e-13	25.078
ENSG00000100097.12	protein_coding	LGALS1	2	OTTHUMG00000150661.2	chr22	HAVANA	gene	37675636	37679802	+	1.13312	7.58911	29.1022	3.07153e-15	1.01572e-13	25.0682
ENSG00000140859.16	protein_coding	KIFC3	1	OTTHUMG00000133455.20	chr16	HAVANA	gene	57758217	57863053	-	-1.7996	5.59299	-28.7071	3.80411e-15	1.18984e-13	25.0634
ENSG00000172830.13	protein_coding	SSH3	2	OTTHUMG00000167105.4	chr11	HAVANA	gene	67303478	67312607	+	2.06057	5.83153	28.7044	3.80972e-15	1.18984e-13	25.0593
ENSG00000157637.13	protein_coding	SLC38A10	1	OTTHUMG00000168049.4	chr17	HAVANA	gene	81244811	81295547	-	1.21592	7.34811	29.0221	3.20698e-15	1.04358e-13	25.0524
ENSG00000163597.17	lncRNA	SNHG16	1	OTTHUMG00000132201.6	chr17	HAVANA	gene	76557727	76670985	+	-1.75923	6.79332	-28.9017	3.4226e-15	1.0946e-13	25.0496
ENSG00000072501.19	protein_coding	SMC1A	2	OTTHUMG00000021614.7	chrX	HAVANA	gene	53374149	53422728	-	-1.26429	7.54576	-29.0671	3.1301e-15	1.02676e-13	25.0489
ENSG00000095319.14	protein_coding	NUP188	2	OTTHUMG00000020768.7	chr9	HAVANA	gene	128947699	129007096	+	-1.34471	6.87285	-28.9008	3.4242e-15	1.0946e-13	25.0324
ENSG00000106628.13	protein_coding	POLD2	1	OTTHUMG00000022909.15	chr7	HAVANA	gene	44114631	44124358	-	-1.14059	7.6501	-29.058	3.14552e-15	1.02975e-13	25.0305
ENSG00000111799.22	protein_coding	COL12A1	1	OTTHUMG00000015051.8	chr6	HAVANA	gene	75084326	75206267	-	1.25775	8.07679	29.1116	3.05598e-15	1.0147e-13	25.0182
ENSG00000075702.19	protein_coding	WDR62	2	OTTHUMG00000048139.9	chr19	HAVANA	gene	36054649	36105108	+	-2.17973	4.97938	-28.5356	4.17801e-15	1.28275e-13	25.0058
ENSG00000104419.17	protein_coding	NDRG1	1	OTTHUMG00000164441.4	chr8	HAVANA	gene	133237175	133302022	-	2.33769	4.72168	28.536	4.17719e-15	1.28275e-13	24.9988
ENSG00000143815.15	protein_coding	LBR	2	OTTHUMG00000037520.18	chr1	HAVANA	gene	225401502	225428925	-	-2.10156	6.02529	-28.6307	3.96624e-15	1.23165e-13	24.989
ENSG00000109436.8	protein_coding	TBC1D9	2	OTTHUMG00000161405.3	chr4	HAVANA	gene	140620782	140756385	-	2.1346	5.09959	28.4927	4.27762e-15	1.31087e-13	24.9824
ENSG00000163468.15	protein_coding	CCT3	1	OTTHUMG00000024061.8	chr1	HAVANA	gene	156308968	156367873	-	-0.945745	8.63552	-29.1663	2.96754e-15	9.97521e-14	24.9719
ENSG00000126602.11	protein_coding	TRAP1	2	OTTHUMG00000129427.4	chr16	HAVANA	gene	3651639	3717553	-	-1.32023	6.49675	-28.7178	3.78198e-15	1.18801e-13	24.971
ENSG00000162063.13	protein_coding	CCNF	2	OTTHUMG00000128858.3	chr16	HAVANA	gene	2429394	2458854	+	-1.93869	5.32386	-28.4835	4.29928e-15	1.31503e-13	24.9605
ENSG00000033170.17	protein_coding	FUT8	1	OTTHUMG00000142818.5	chr14	HAVANA	gene	65410592	65744121	+	1.25242	7.65769	28.9039	3.41855e-15	1.0946e-13	24.9505
ENSG00000197948.11	protein_coding	FCHSD1	1	OTTHUMG00000163762.5	chr5	HAVANA	gene	141639302	141651418	-	2.55001	5.24564	28.428	4.43245e-15	1.33819e-13	24.9468
ENSG00000253729.9	protein_coding	PRKDC	1	OTTHUMG00000164239.7	chr8	HAVANA	gene	47773111	47960178	-	-1.23678	8.79511	-29.1495	2.99435e-15	1.00035e-13	24.9453
ENSG00000076067.14	protein_coding	RBMS2	2	OTTHUMG00000170488.6	chr12	HAVANA	gene	56521820	56596193	+	-1.08684	7.65713	-28.9067	3.4132e-15	1.0946e-13	24.944
ENSG00000233016.9	lncRNA	SNHG7	2	OTTHUMG00000020949.5	chr9	HAVANA	gene	136721366	136728184	-	-1.73972	5.46488	-28.4425	4.39718e-15	1.33745e-13	24.9247
ENSG00000184216.15	protein_coding	IRAK1	1	OTTHUMG00000024228.46	chrX	HAVANA	gene	154010506	154019902	-	-0.837531	10.1797	-29.417	2.59529e-15	8.88887e-14	24.9116
ENSG00000128272.18	protein_coding	ATF4	2	OTTHUMG00000151099.2	chr22	HAVANA	gene	39519695	39522683	+	-0.974666	8.48334	-29.018	3.21402e-15	1.04379e-13	24.9071
ENSG00000135451.13	protein_coding	TROAP	2	OTTHUMG00000169486.3	chr12	HAVANA	gene	49323236	49331731	+	-1.87928	5.5027	-28.4117	4.47233e-15	1.34773e-13	24.9071
ENSG00000143621.17	protein_coding	ILF2	2	OTTHUMG00000037087.2	chr1	HAVANA	gene	153661788	153671028	-	-1.0542	7.86991	-28.871	3.48001e-15	1.10594e-13	24.8985
ENSG00000183856.11	protein_coding	IQGAP3	2	OTTHUMG00000033114.4	chr1	HAVANA	gene	156525405	156572604	-	-1.33957	6.44666	-28.5766	4.0853e-15	1.26566e-13	24.8972
ENSG00000157827.20	protein_coding	FMNL2	1	OTTHUMG00000154035.7	chr2	HAVANA	gene	152335174	152649826	+	1.40053	6.62208	28.5739	4.09127e-15	1.26566e-13	24.8873
ENSG00000134107.5	protein_coding	BHLHE40	2	OTTHUMG00000119035.3	chr3	HAVANA	gene	4979437	4985323	+	1.88578	5.42198	28.3155	4.71605e-15	1.40559e-13	24.8678
ENSG00000162545.6	protein_coding	CAMK2N1	2	OTTHUMG00000002837.2	chr1	HAVANA	gene	20482391	20486210	-	-2.71375	4.39811	-28.3326	4.67167e-15	1.39491e-13	24.8646
ENSG00000006756.16	protein_coding	ARSD	1	OTTHUMG00000021077.4	chrX	HAVANA	gene	2903972	2929349	-	2.36185	4.73831	28.2866	4.79193e-15	1.42314e-13	24.8637
ENSG00000084731.15	protein_coding	KIF3C	1	OTTHUMG00000094797.5	chr2	HAVANA	gene	25926598	25982749	-	2.21663	4.59582	28.2831	4.80113e-15	1.42314e-13	24.8566
ENSG00000012963.15	protein_coding	UBR7	2	OTTHUMG00000171268.3	chr14	HAVANA	gene	93207241	93229215	+	-1.52632	6.12157	-28.4287	4.43077e-15	1.33819e-13	24.852
ENSG00000156804.7	protein_coding	FBXO32	2	OTTHUMG00000164981.2	chr8	HAVANA	gene	123497889	123541206	-	3.9511	3.98445	28.944	3.34515e-15	1.08206e-13	24.8513
ENSG00000124570.21	protein_coding	SERPINB6	2	OTTHUMG00000016170.12	chr6	HAVANA	gene	2948159	2972165	-	1.38549	6.7897	28.5431	4.16081e-15	1.2823e-13	24.8502
ENSG00000146648.21	protein_coding	EGFR	1	OTTHUMG00000023661.5	chr7	HAVANA	gene	55019017	55211628	+	-1.05152	9.33606	-29.0807	3.1072e-15	1.0213e-13	24.8363
ENSG00000136824.19	protein_coding	SMC2	2	OTTHUMG00000020401.6	chr9	HAVANA	gene	104094260	104141419	+	-1.59436	6.04317	-28.3797	4.55176e-15	1.36662e-13	24.834
ENSG00000164109.14	protein_coding	MAD2L1	2	OTTHUMG00000132967.4	chr4	HAVANA	gene	120055623	120066858	-	-2.87743	5.1367	-28.1886	5.05922e-15	1.48882e-13	24.8152
ENSG00000213551.7	protein_coding	DNAJC9	2	OTTHUMG00000196006.1	chr10	HAVANA	gene	73183362	73247255	-	-1.45421	6.15458	-28.3574	4.60827e-15	1.38104e-13	24.8068
ENSG00000092853.14	protein_coding	CLSPN	2	OTTHUMG00000004168.7	chr1	HAVANA	gene	35720218	35769978	-	-2.6008	5.16966	-28.1702	5.11092e-15	1.49325e-13	24.8022
ENSG00000197961.12	protein_coding	ZNF121	2	OTTHUMG00000180134.4	chr19	HAVANA	gene	9560329	9584504	-	-1.55546	5.68767	-28.254	4.87904e-15	1.44361e-13	24.7966
ENSG00000012822.16	protein_coding	CALCOCO1	1	OTTHUMG00000170095.5	chr12	HAVANA	gene	53708517	53727745	-	2.27225	5.4278	28.1749	5.09759e-15	1.49203e-13	24.7961
ENSG00000166881.10	protein_coding	NEMP1	2	OTTHUMG00000171021.2	chr12	HAVANA	gene	57055643	57088063	-	-2.19249	5.36042	-28.1797	5.08404e-15	1.49074e-13	24.7927
ENSG00000131711.15	protein_coding	MAP1B	1	OTTHUMG00000100952.13	chr5	HAVANA	gene	72107234	72209565	+	1.70103	6.90994	28.4346	4.41635e-15	1.33819e-13	24.7819
ENSG00000177666.17	protein_coding	PNPLA2	2	OTTHUMG00000133309.5	chr11	HAVANA	gene	818914	825573	+	1.28611	6.92483	28.454	4.36939e-15	1.33148e-13	24.7816
ENSG00000101868.13	protein_coding	POLA1	2	OTTHUMG00000021277.3	chrX	HAVANA	gene	24693873	24996986	+	-2.06384	5.42354	-28.1431	5.18865e-15	1.5094e-13	24.7655
ENSG00000084774.14	protein_coding	CAD	1	OTTHUMG00000097070.6	chr2	HAVANA	gene	27217369	27243943	+	-1.18901	7.58005	-28.565	4.11138e-15	1.26947e-13	24.7599
ENSG00000156261.13	protein_coding	CCT8	2	OTTHUMG00000044595.6	chr21	HAVANA	gene	29055805	29073797	-	-1.08689	8.28343	-28.6816	3.85746e-15	1.20245e-13	24.7415
ENSG00000141574.8	protein_coding	SECTM1	2	OTTHUMG00000178668.3	chr17	HAVANA	gene	82321024	82334074	-	2.4563	4.67646	28.0587	5.43805e-15	1.56637e-13	24.7334
ENSG00000115946.8	protein_coding	PNO1	2	OTTHUMG00000129563.3	chr2	HAVANA	gene	68157888	68176238	+	-1.67955	5.63939	-28.1272	5.23449e-15	1.51847e-13	24.7315
ENSG00000144677.15	protein_coding	CTDSPL	1	OTTHUMG00000155942.4	chr3	HAVANA	gene	37861880	37984469	+	-1.33675	6.25167	-28.1802	5.08274e-15	1.49074e-13	24.693
ENSG00000138160.7	protein_coding	KIF11	2	OTTHUMG00000018761.3	chr10	HAVANA	gene	92574105	92655395	+	-1.98486	6.36172	-28.1639	5.12898e-15	1.49585e-13	24.686
ENSG00000266976.3	lncRNA	ENSG00000266976	2	OTTHUMG00000180814.3	chr19	HAVANA	gene	28606688	28615229	+	4.01825	5.09996	28	5.61904e-15	1.60997e-13	24.6831
ENSG00000126457.22	protein_coding	PRMT1	2	OTTHUMG00000167568.3	chr19	HAVANA	gene	49675786	49689029	+	-1.08291	7.47842	-28.3946	4.5146e-15	1.35796e-13	24.6731
ENSG00000163655.16	protein_coding	GMPS	2	OTTHUMG00000158551.3	chr3	HAVANA	gene	155870650	155944020	+	-1.18993	7.27159	-28.3386	4.65618e-15	1.39284e-13	24.6659
ENSG00000176678.6	protein_coding	FOXL1	2	OTTHUMG00000137653.5	chr16	HAVANA	gene	86576368	86583478	+	-1.46359	5.90092	-28.0442	5.48224e-15	1.57631e-13	24.6547
ENSG00000088205.13	protein_coding	DDX18	2	OTTHUMG00000058521.10	chr2	HAVANA	gene	117814691	117832377	+	-1.30875	7.13578	-28.2845	4.79736e-15	1.42314e-13	24.6519
ENSG00000123908.12	protein_coding	AGO2	1	OTTHUMG00000164232.7	chr8	HAVANA	gene	140520156	140635633	-	-1.31495	6.3679	-28.1099	5.28526e-15	1.52776e-13	24.6394
ENSG00000157483.9	protein_coding	MYO1E	1	OTTHUMG00000171944.4	chr15	HAVANA	gene	59132434	59372871	-	1.31847	7.1158	28.2171	4.97968e-15	1.46806e-13	24.6239
ENSG00000166833.23	protein_coding	NAV2	1	OTTHUMG00000151837.7	chr11	HAVANA	gene	19350724	20121601	+	-1.32874	6.61623	-28.1122	5.27836e-15	1.52776e-13	24.6128
ENSG00000196584.4	protein_coding	XRCC2	2	OTTHUMG00000151470.2	chr7	HAVANA	gene	152644776	152676193	-	-3.35274	3.54766	-28.4355	4.41425e-15	1.33819e-13	24.6056
ENSG00000100284.22	protein_coding	TOM1	2	OTTHUMG00000150958.6	chr22	HAVANA	gene	35299275	35347992	+	1.87905	5.2509	27.822	6.20798e-15	1.74231e-13	24.5993
ENSG00000163714.18	protein_coding	U2SURP	1	OTTHUMG00000159323.19	chr3	HAVANA	gene	142964497	143060725	+	-1.17528	7.62784	-28.2467	4.89873e-15	1.44681e-13	24.5714
ENSG00000205339.10	protein_coding	IPO7	2	OTTHUMG00000165753.3	chr11	HAVANA	gene	9384652	9448127	+	-1.09142	8.77252	-28.4681	4.33568e-15	1.32368e-13	24.5586
ENSG00000136718.10	protein_coding	IMP4	2	OTTHUMG00000131627.4	chr2	HAVANA	gene	130342877	130347967	+	-1.39184	6.42977	-27.9686	5.71835e-15	1.63268e-13	24.5524
ENSG00000138347.17	protein_coding	MYPN	2	OTTHUMG00000018344.1	chr10	HAVANA	gene	68087897	68212017	+	2.32803	4.7184	27.7219	6.56753e-15	1.82714e-13	24.5517
ENSG00000011260.14	protein_coding	UTP18	2	OTTHUMG00000162370.5	chr17	HAVANA	gene	51260546	51297936	+	-1.45304	6.06376	-27.868	6.04973e-15	1.7123e-13	24.5361
ENSG00000151012.13	protein_coding	SLC7A11	2	OTTHUMG00000133396.2	chr4	HAVANA	gene	138164097	138242349	-	-2.14834	6.07573	-27.825	6.19728e-15	1.74231e-13	24.527
ENSG00000101384.12	protein_coding	JAG1	2	OTTHUMG00000031872.6	chr20	HAVANA	gene	10637684	10673999	-	-1.93029	5.05663	-27.6789	6.72886e-15	1.85933e-13	24.522
ENSG00000165490.13	protein_coding	DDIAS	2	OTTHUMG00000166929.3	chr11	HAVANA	gene	82899975	82958277	+	-3.00621	4.48109	-27.6856	6.70351e-15	1.85547e-13	24.51
ENSG00000068650.19	protein_coding	ATP11A	2	OTTHUMG00000017371.10	chr13	HAVANA	gene	112690038	112887168	+	1.29316	6.67534	27.9192	5.87852e-15	1.67196e-13	24.5035
ENSG00000137812.21	protein_coding	KNL1	2	OTTHUMG00000166532.6	chr15	HAVANA	gene	40594020	40664342	+	-2.24594	5.02886	-27.6352	6.89691e-15	1.89613e-13	24.5018
ENSG00000072571.20	protein_coding	HMMR	2	OTTHUMG00000130381.8	chr5	HAVANA	gene	163460203	163491941	+	-2.4252	5.82122	-27.714	6.59679e-15	1.83187e-13	24.4965
ENSG00000179041.4	protein_coding	RRS1	2	OTTHUMG00000164765.3	chr8	HAVANA	gene	66429014	66430733	+	-1.9352	5.28082	-27.6463	6.85393e-15	1.88749e-13	24.4903
ENSG00000167900.12	protein_coding	TK1	2	OTTHUMG00000150674.6	chr17	HAVANA	gene	78174091	78187233	-	-1.18423	7.17494	-28.0037	5.60724e-15	1.60942e-13	24.4836
ENSG00000125730.18	protein_coding	C3	2	OTTHUMG00000150335.7	chr19	HAVANA	gene	6677704	6730562	-	1.13819	7.08318	27.9577	5.75341e-15	1.63982e-13	24.4742
ENSG00000167721.11	protein_coding	TSR1	2	OTTHUMG00000177636.7	chr17	HAVANA	gene	2322396	2336657	-	-1.43185	7.20231	-27.9733	5.70349e-15	1.6313e-13	24.4659
ENSG00000186871.7	protein_coding	ERCC6L	1	OTTHUMG00000021810.4	chrX	HAVANA	gene	72204657	72239027	-	-2.64319	4.47691	-27.5861	7.09133e-15	1.93005e-13	24.4658
ENSG00000196756.15	lncRNA	SNHG17	2	OTTHUMG00000032442.90	chr20	HAVANA	gene	38419638	38435409	-	-1.98628	5.07435	-27.4935	7.47401e-15	2.02743e-13	24.4157
ENSG00000132470.14	protein_coding	ITGB4	1	OTTHUMG00000179814.4	chr17	HAVANA	gene	75721328	75757818	+	1.24599	7.04939	27.8423	6.13755e-15	1.73415e-13	24.4132
ENSG00000123473.17	protein_coding	STIL	1	OTTHUMG00000007851.4	chr1	HAVANA	gene	47250139	47314892	-	-1.65028	5.64812	-27.545	7.25847e-15	1.97225e-13	24.3958
ENSG00000165724.6	protein_coding	ZMYND19	2	OTTHUMG00000020992.2	chr9	HAVANA	gene	137582081	137590512	-	-1.83266	4.95143	-27.4477	7.67109e-15	2.06033e-13	24.3934
ENSG00000054277.14	protein_coding	OPN3	2	OTTHUMG00000039691.5	chr1	HAVANA	gene	241590102	241677376	-	2.04626	5.2686	27.4425	7.69391e-15	2.06306e-13	24.3845
ENSG00000105835.13	protein_coding	NAMPT	2	OTTHUMG00000140388.5	chr7	HAVANA	gene	106248298	106285966	-	-1.47678	7.73831	-27.9167	5.88669e-15	1.67196e-13	24.3702
ENSG00000173207.13	protein_coding	CKS1B	2	OTTHUMG00000037413.4	chr1	HAVANA	gene	154974653	154979251	+	-1.93579	4.81134	-27.3815	7.96597e-15	2.11858e-13	24.361
ENSG00000075142.14	protein_coding	SRI	2	OTTHUMG00000157267.4	chr7	HAVANA	gene	88205115	88226993	-	1.21442	7.23	27.7907	6.31793e-15	1.76941e-13	24.3606
ENSG00000136271.11	protein_coding	DDX56	1	OTTHUMG00000129211.3	chr7	HAVANA	gene	44565804	44575051	-	-1.22179	7.11607	-27.7779	6.36381e-15	1.77653e-13	24.3591
ENSG00000168439.17	protein_coding	STIP1	1	OTTHUMG00000167789.6	chr11	HAVANA	gene	64185272	64204543	+	-0.984572	8.55879	-28.0664	5.41482e-15	1.56244e-13	24.3515
ENSG00000141076.18	protein_coding	UTP4	1	OTTHUMG00000137570.7	chr16	HAVANA	gene	69131291	69231130	+	-1.2862	6.74904	-27.6157	6.97362e-15	1.90786e-13	24.308
ENSG00000183431.12	protein_coding	SF3A3	2	OTTHUMG00000004438.2	chr1	HAVANA	gene	37956975	37990075	-	-1.31231	6.87005	-27.6154	6.97471e-15	1.90786e-13	24.2939
ENSG00000122966.18	protein_coding	CIT	1	OTTHUMG00000134325.9	chr12	HAVANA	gene	119685791	119877320	-	-1.66781	6.05931	-27.4254	7.76886e-15	2.07973e-13	24.2837
ENSG00000120800.5	protein_coding	UTP20	2	OTTHUMG00000170270.2	chr12	HAVANA	gene	101280105	101386618	+	-1.42725	6.27671	-27.4539	7.6439e-15	2.05641e-13	24.2706
ENSG00000101945.17	protein_coding	SUV39H1	2	OTTHUMG00000022701.3	chrX	HAVANA	gene	48695554	48709016	+	-2.02374	4.9789	-27.2209	8.73217e-15	2.29067e-13	24.2637
ENSG00000134755.18	protein_coding	DSC2	2	OTTHUMG00000131981.8	chr18	HAVANA	gene	31058840	31102522	-	2.369	4.3663	27.2299	8.68735e-15	2.28435e-13	24.2523
ENSG00000089280.19	protein_coding	FUS	2	OTTHUMG00000132395.5	chr16	HAVANA	gene	31180138	31191605	+	-0.935879	8.31757	-27.8216	6.20919e-15	1.74231e-13	24.2376
ENSG00000065534.20	protein_coding	MYLK	1	OTTHUMG00000141304.13	chr3	HAVANA	gene	123610049	123884332	-	2.08963	5.18922	27.1691	8.99571e-15	2.34461e-13	24.2314
ENSG00000137310.13	protein_coding	TCF19	2	OTTHUMG00000031274.4	chr6	HAVANA	gene	31158331	31167159	+	-1.51543	6.25878	-27.3707	8.01488e-15	2.12812e-13	24.2254
ENSG00000231925.14	protein_coding	TAPBP	1	OTTHUMG00000031090.6	chr6	HAVANA	gene	33299694	33314284	-	1.1959	8.01761	27.7113	6.60699e-15	1.83187e-13	24.2186
ENSG00000026751.17	protein_coding	SLAMF7	2	OTTHUMG00000024008.5	chr1	HAVANA	gene	160739057	160754821	+	2.07148	5.23385	27.1482	9.10472e-15	2.3636e-13	24.2167
ENSG00000119922.11	protein_coding	IFIT2	2	OTTHUMG00000018707.3	chr10	HAVANA	gene	89283694	89309271	+	2.03835	4.75744	27.1155	9.27765e-15	2.40207e-13	24.2111
ENSG00000111602.12	protein_coding	TIMELESS	2	OTTHUMG00000170600.6	chr12	HAVANA	gene	56416363	56449426	-	-1.3579	6.29226	-27.3428	8.14382e-15	2.15533e-13	24.202
ENSG00000137955.16	protein_coding	RABGGTB	2	OTTHUMG00000009786.3	chr1	HAVANA	gene	75786197	75795086	+	-1.17103	6.98934	-27.4818	7.52374e-15	2.03576e-13	24.1992
ENSG00000153207.16	protein_coding	AHCTF1	1	OTTHUMG00000040706.4	chr1	HAVANA	gene	246839098	246931948	-	-1.3762	6.22791	-27.3244	8.23001e-15	2.17462e-13	24.1989
ENSG00000131016.17	protein_coding	AKAP12	2	OTTHUMG00000015833.3	chr6	HAVANA	gene	151239967	151358559	+	-1.72606	5.80985	-27.1678	9.00281e-15	2.34461e-13	24.1605
ENSG00000138678.11	protein_coding	GPAT3	2	OTTHUMG00000130431.4	chr4	HAVANA	gene	83535914	83605875	+	-3.51667	3.55491	-27.6049	7.01611e-15	1.91277e-13	24.1597
ENSG00000153044.10	protein_coding	CENPH	2	OTTHUMG00000097816.3	chr5	HAVANA	gene	69189574	69210357	+	-2.48751	4.28367	-27.0558	9.60232e-15	2.4653e-13	24.1577
ENSG00000071127.18	protein_coding	WDR1	2	OTTHUMG00000160253.3	chr4	HAVANA	gene	10068089	10116972	-	0.897626	8.89666	27.7881	6.32745e-15	1.76941e-13	24.1494
ENSG00000145555.15	protein_coding	MYO10	1	OTTHUMG00000161822.5	chr5	HAVANA	gene	16661907	16936288	-	-1.27663	7.3556	-27.4617	7.60999e-15	2.05074e-13	24.1453
ENSG00000013573.17	protein_coding	DDX11	2	OTTHUMG00000168435.7	chr12	HAVANA	gene	31073860	31104799	+	-2.11437	5.77404	-27.1146	9.28235e-15	2.40207e-13	24.1424
ENSG00000168003.19	protein_coding	SLC3A2	1	OTTHUMG00000074091.8	chr11	HAVANA	gene	62856004	62888880	+	-1.12796	7.1573	-27.4201	7.79237e-15	2.08261e-13	24.1424
ENSG00000124788.19	protein_coding	ATXN1	2	OTTHUMG00000014303.5	chr6	HAVANA	gene	16299112	16761491	-	2.39206	4.47077	27.0089	9.86604e-15	2.5093e-13	24.136
ENSG00000060688.13	protein_coding	SNRNP40	2	OTTHUMG00000003790.3	chr1	HAVANA	gene	31259568	31296788	-	-1.49672	5.5751	-27.0928	9.39981e-15	2.42861e-13	24.1351
ENSG00000100664.11	protein_coding	EIF5	1	OTTHUMG00000171839.4	chr14	HAVANA	gene	103333544	103345025	+	-1.00868	9.2224	-27.8372	6.15531e-15	1.73616e-13	24.1326
ENSG00000137942.18	protein_coding	FNBP1L	2	OTTHUMG00000010863.4	chr1	HAVANA	gene	93448118	93554661	+	1.60204	6.46529	27.2195	8.73949e-15	2.29067e-13	24.126
ENSG00000239672.8	protein_coding	NME1	2	OTTHUMG00000137474.5	chr17	HAVANA	gene	51153559	51162428	+	-1.41896	6.44571	-27.2363	8.65555e-15	2.27967e-13	24.1223
ENSG00000096060.15	protein_coding	FKBP5	2	OTTHUMG00000014576.2	chr6	HAVANA	gene	35573585	35728583	-	-2.03712	4.90004	-26.942	1.02556e-14	2.59219e-13	24.1052
ENSG00000169129.16	protein_coding	AFAP1L2	2	OTTHUMG00000019086.4	chr10	HAVANA	gene	114294824	114404756	-	1.46929	6.39114	27.1734	8.97366e-15	2.34451e-13	24.1039
ENSG00000124795.17	protein_coding	DEK	1	OTTHUMG00000014319.13	chr6	HAVANA	gene	18223860	18264548	-	-1.58712	7.55672	-27.4048	7.86064e-15	2.0948e-13	24.0918
ENSG00000176920.14	protein_coding	FUT2	2	OTTHUMG00000164427.7	chr19	HAVANA	gene	48695971	48705951	+	2.82683	4.176	27.0282	9.75671e-15	2.49316e-13	24.088
ENSG00000120438.12	protein_coding	TCP1	2	OTTHUMG00000015937.6	chr6	HAVANA	gene	159778498	159789703	-	-1.08285	7.89028	-27.4617	7.61025e-15	2.05074e-13	24.0788
ENSG00000159200.18	protein_coding	RCAN1	1	OTTHUMG00000086235.5	chr21	HAVANA	gene	34513142	34615113	-	2.30988	6.40371	27.0743	9.50077e-15	2.44308e-13	24.0706
ENSG00000093009.11	protein_coding	CDC45	1	OTTHUMG00000150386.3	chr22	HAVANA	gene	19479457	19520612	+	-2.45828	3.99831	-26.9539	1.01849e-14	2.57834e-13	24.0671
ENSG00000167123.20	protein_coding	CERCAM	2	OTTHUMG00000020747.6	chr9	HAVANA	gene	128411751	128437351	+	1.74985	5.39302	26.9219	1.03759e-14	2.61854e-13	24.0666
ENSG00000185238.13	protein_coding	PRMT3	2	OTTHUMG00000166022.4	chr11	HAVANA	gene	20387558	20509338	+	-2.00524	4.92437	-26.8731	1.06737e-14	2.67714e-13	24.0636
ENSG00000147010.19	protein_coding	SH3KBP1	2	OTTHUMG00000021227.3	chrX	HAVANA	gene	19533977	19887600	-	1.01004	7.61533	27.3603	8.06304e-15	2.13743e-13	24.0567
ENSG00000160190.14	protein_coding	SLC37A1	2	OTTHUMG00000086803.7	chr21	HAVANA	gene	42496008	42581440	+	1.78208	5.08877	26.8686	1.07016e-14	2.68e-13	24.0562
ENSG00000023608.5	protein_coding	SNAPC1	2	OTTHUMG00000140343.3	chr14	HAVANA	gene	61762420	61796428	+	-1.72323	5.32834	-26.9094	1.04513e-14	2.6335e-13	24.0539
ENSG00000011304.22	protein_coding	PTBP1	2	OTTHUMG00000181789.13	chr19	HAVANA	gene	797075	812327	+	-0.971907	9.1347	-27.6757	6.74121e-15	1.85959e-13	24.0481
ENSG00000111845.5	protein_coding	PAK1IP1	2	OTTHUMG00000014245.2	chr6	HAVANA	gene	10694972	10709782	+	-1.75095	5.43146	-26.8893	1.05739e-14	2.65618e-13	24.0337
ENSG00000130726.12	protein_coding	TRIM28	1	OTTHUMG00000183546.3	chr19	HAVANA	gene	58544064	58550722	+	-0.839168	8.97117	-27.605	7.01591e-15	1.91277e-13	24.0263
ENSG00000146223.16	protein_coding	RPL7L1	2	OTTHUMG00000014710.5	chr6	HAVANA	gene	42879616	42889925	+	-1.19728	7.69676	-27.3107	8.29448e-15	2.18811e-13	24.0136
ENSG00000067798.16	protein_coding	NAV3	1	OTTHUMG00000170001.5	chr12	HAVANA	gene	77324641	78213010	+	-2.79325	3.90077	-26.9003	1.05067e-14	2.64337e-13	23.998
ENSG00000117748.10	protein_coding	RPA2	2	OTTHUMG00000003915.4	chr1	HAVANA	gene	27891524	27914746	-	-1.60905	5.58178	-26.8534	1.07965e-14	2.69962e-13	23.9948
ENSG00000138166.6	protein_coding	DUSP5	2	OTTHUMG00000019040.2	chr10	HAVANA	gene	110497907	110511533	+	-4.35043	3.48578	-27.7519	6.45764e-15	1.79964e-13	23.9864
ENSG00000174371.17	protein_coding	EXO1	1	OTTHUMG00000039965.9	chr1	HAVANA	gene	241847967	241895148	+	-2.36939	4.44529	-26.7339	1.15747e-14	2.88102e-13	23.9863
ENSG00000091651.9	protein_coding	ORC6	2	OTTHUMG00000132539.5	chr16	HAVANA	gene	46689643	46698394	+	-2.5326	4.53074	-26.7264	1.16253e-14	2.88914e-13	23.9832
ENSG00000136295.16	protein_coding	TTYH3	2	OTTHUMG00000152050.4	chr7	HAVANA	gene	2631961	2664802	+	1.12028	7.2891	27.1554	9.06729e-15	2.35764e-13	23.9757
ENSG00000164070.12	protein_coding	HSPA4L	2	OTTHUMG00000133302.5	chr4	HAVANA	gene	127781821	127840733	+	-2.13693	4.88957	-26.7133	1.1715e-14	2.90135e-13	23.9728
ENSG00000153029.16	protein_coding	MR1	2	OTTHUMG00000035175.2	chr1	HAVANA	gene	181033374	181061938	+	2.13616	5.04577	26.7114	1.17278e-14	2.90135e-13	23.9709
ENSG00000155324.10	protein_coding	GRAMD2B	2	OTTHUMG00000128943.9	chr5	HAVANA	gene	126360132	126496494	+	1.06607	7.55526	27.1993	8.84138e-15	2.31366e-13	23.9687
ENSG00000085415.16	protein_coding	SEH1L	2	OTTHUMG00000181909.3	chr18	HAVANA	gene	12947133	12987536	+	-1.591	5.68244	-26.825	1.09761e-14	2.74034e-13	23.9672
ENSG00000129351.18	protein_coding	ILF3	2	OTTHUMG00000180587.2	chr19	HAVANA	gene	10654304	10692400	+	-0.858941	8.91248	-27.4804	7.52967e-15	2.03576e-13	23.9598
ENSG00000077152.12	protein_coding	UBE2T	2	OTTHUMG00000041392.5	chr1	HAVANA	gene	202331544	202341984	-	-2.00383	4.7389	-26.6736	1.19899e-14	2.94828e-13	23.953
ENSG00000055483.20	protein_coding	USP36	1	OTTHUMG00000177542.10	chr17	HAVANA	gene	78787381	78841441	-	-1.25423	6.7903	-27.0106	9.85611e-15	2.5093e-13	23.9432
ENSG00000146263.12	protein_coding	MMS22L	1	OTTHUMG00000015248.4	chr6	HAVANA	gene	97142161	97283217	-	-2.22806	4.51017	-26.6267	1.23234e-14	3.00762e-13	23.9271
ENSG00000132793.12	protein_coding	LPIN3	2	OTTHUMG00000033056.3	chr20	HAVANA	gene	41340821	41360582	+	2.19843	5.28864	26.6371	1.22489e-14	2.99391e-13	23.9158
ENSG00000119969.16	protein_coding	HELLS	1	OTTHUMG00000018793.3	chr10	HAVANA	gene	94545329	94613905	+	-2.12625	5.03847	-26.5788	1.26749e-14	3.07957e-13	23.886
ENSG00000180198.17	protein_coding	RCC1	1	OTTHUMG00000003645.13	chr1	HAVANA	gene	28505943	28539300	+	-1.13413	7.30759	-27.0178	9.81517e-15	2.50417e-13	23.8841
ENSG00000101335.10	protein_coding	MYL9	2	OTTHUMG00000032387.4	chr20	HAVANA	gene	36541497	36551447	+	3.32889	3.76637	26.989	9.98025e-15	2.53439e-13	23.8821
ENSG00000092470.12	protein_coding	WDR76	1	OTTHUMG00000060143.12	chr15	HAVANA	gene	43826980	43868412	+	-2.32799	4.24675	-26.5318	1.30298e-14	3.14703e-13	23.8594
ENSG00000136108.15	protein_coding	CKAP2	1	OTTHUMG00000016967.9	chr13	HAVANA	gene	52455429	52476628	+	-1.86533	5.93938	-26.6486	1.21663e-14	2.98266e-13	23.8401
ENSG00000135486.19	protein_coding	HNRNPA1	2	OTTHUMG00000169702.4	chr12	HAVANA	gene	54280193	54287088	+	-0.889124	9.51769	-27.4041	7.8637e-15	2.0948e-13	23.8354
ENSG00000074800.16	protein_coding	ENO1	2	OTTHUMG00000001773.11	chr1	HAVANA	gene	8861000	8879190	-	-0.657504	11.4568	-27.8719	6.03642e-15	1.71151e-13	23.8289
ENSG00000085999.13	protein_coding	RAD54L	1	OTTHUMG00000007772.10	chr1	HAVANA	gene	46246461	46278480	+	-2.64607	3.97684	-26.5533	1.28662e-14	3.12139e-13	23.8284
ENSG00000013288.9	protein_coding	MAN2B2	2	OTTHUMG00000160073.4	chr4	HAVANA	gene	6575189	6623362	+	1.59395	5.56604	26.5425	1.29481e-14	3.13193e-13	23.8212
ENSG00000198826.11	protein_coding	ARHGAP11A	1	OTTHUMG00000129289.4	chr15	HAVANA	gene	32615144	32639941	+	-2.23631	5.51491	-26.5217	1.31068e-14	3.15163e-13	23.8184
ENSG00000126261.13	protein_coding	UBA2	2	OTTHUMG00000182090.8	chr19	HAVANA	gene	34428352	34471251	+	-1.63392	6.3196	-26.6827	1.1926e-14	2.93701e-13	23.8102
ENSG00000184445.12	protein_coding	KNTC1	1	OTTHUMG00000168861.7	chr12	HAVANA	gene	122527246	122626396	+	-1.5206	5.58518	-26.5288	1.30528e-14	3.14792e-13	23.7981
ENSG00000138668.20	protein_coding	HNRNPD	1	OTTHUMG00000130290.5	chr4	HAVANA	gene	82352498	82374503	-	-1.02736	8.31026	-27.0788	9.47614e-15	2.44059e-13	23.7964
ENSG00000115484.15	protein_coding	CCT4	2	OTTHUMG00000152166.5	chr2	HAVANA	gene	61868085	61888671	-	-0.978051	8.32842	-27.0811	9.46315e-15	2.44059e-13	23.7951
ENSG00000105202.9	protein_coding	FBL	2	OTTHUMG00000182581.8	chr19	HAVANA	gene	39834458	39846379	-	-1.65074	6.36609	-26.6637	1.20596e-14	2.96096e-13	23.7934
ENSG00000177106.17	protein_coding	EPS8L2	1	OTTHUMG00000165165.12	chr11	HAVANA	gene	694438	727727	+	1.34473	8.37623	27.0518	9.62447e-15	2.4671e-13	23.7826
ENSG00000108021.22	protein_coding	TASOR2	1	OTTHUMG00000017605.6	chr10	HAVANA	gene	5684731	5763779	+	-1.20552	6.8127	-26.7339	1.1575e-14	2.88102e-13	23.7727
ENSG00000108055.11	protein_coding	SMC3	2	OTTHUMG00000019042.1	chr10	HAVANA	gene	110567684	110606048	+	-1.33897	6.44741	-26.6372	1.2248e-14	2.99391e-13	23.7608
ENSG00000147536.12	protein_coding	GINS4	2	OTTHUMG00000164079.4	chr8	HAVANA	gene	41529218	41545030	+	-2.39422	4.55705	-26.3255	1.47162e-14	3.46703e-13	23.7506
ENSG00000122642.11	protein_coding	FKBP9	1	OTTHUMG00000097847.4	chr7	HAVANA	gene	32957404	33006930	+	1.29337	6.40348	26.5798	1.26675e-14	3.07957e-13	23.741
ENSG00000109756.10	protein_coding	RAPGEF2	1	OTTHUMG00000161451.6	chr4	HAVANA	gene	159103013	159360174	+	1.45991	6.29004	26.5485	1.29019e-14	3.12541e-13	23.7404
ENSG00000111581.10	protein_coding	NUP107	1	OTTHUMG00000169265.4	chr12	HAVANA	gene	68686951	68745809	+	-1.44738	6.10824	-26.4682	1.35265e-14	3.23347e-13	23.7011
ENSG00000189143.10	protein_coding	CLDN4	1	OTTHUMG00000023425.4	chr7	HAVANA	gene	73799542	73832690	+	1.17626	6.84153	26.6077	1.24612e-14	3.0367e-13	23.701
ENSG00000006534.17	protein_coding	ALDH3B1	2	OTTHUMG00000154910.7	chr11	HAVANA	gene	68008578	68029282	+	3.17697	3.9524	26.4893	1.33596e-14	3.20295e-13	23.6976
ENSG00000144354.15	protein_coding	CDCA7	2	OTTHUMG00000132296.3	chr2	HAVANA	gene	173354820	173368997	+	-4.47915	3.23742	-27.6283	6.92385e-15	1.90033e-13	23.6941
ENSG00000165304.8	protein_coding	MELK	2	OTTHUMG00000019906.8	chr9	HAVANA	gene	36572862	36677683	+	-1.60357	6.01258	-26.4003	1.40792e-14	3.33643e-13	23.6746
ENSG00000067533.6	protein_coding	RRP15	2	OTTHUMG00000039494.5	chr1	HAVANA	gene	218285293	218337983	+	-1.6293	5.38739	-26.2727	1.51841e-14	3.56694e-13	23.6655
ENSG00000150961.15	protein_coding	SEC24D	1	OTTHUMG00000132957.8	chr4	HAVANA	gene	118722823	118838683	-	1.25751	6.41259	26.4191	1.3924e-14	3.32361e-13	23.6409
ENSG00000105357.20	protein_coding	MYH14	2	OTTHUMG00000183034.7	chr19	HAVANA	gene	50188186	50310542	+	3.40644	3.61017	26.6848	1.19114e-14	2.93701e-13	23.6403
ENSG00000177469.13	protein_coding	CAVIN1	2	OTTHUMG00000180137.2	chr17	HAVANA	gene	42402449	42423256	-	0.80458	9.38749	27.0374	9.70505e-15	2.48385e-13	23.6346
ENSG00000205413.8	protein_coding	SAMD9	2	OTTHUMG00000155809.4	chr7	HAVANA	gene	93099513	93118023	-	1.86954	6.55631	26.4009	1.40746e-14	3.33643e-13	23.6297
ENSG00000126432.14	protein_coding	PRDX5	2	OTTHUMG00000168805.3	chr11	HAVANA	gene	64318121	64321811	+	1.30313	6.52944	26.4077	1.4018e-14	3.33643e-13	23.6208
ENSG00000129195.16	protein_coding	PIMREG	1	OTTHUMG00000177832.6	chr17	HAVANA	gene	6444441	6451469	+	-2.18434	4.44336	-26.0866	1.6964e-14	3.91733e-13	23.6086
ENSG00000167173.19	protein_coding	C15orf39	2	OTTHUMG00000142820.5	chr15	HAVANA	gene	75195643	75212169	+	-1.51098	5.45846	-26.1834	1.60117e-14	3.72912e-13	23.6016
ENSG00000134531.10	protein_coding	EMP1	1	OTTHUMG00000168775.6	chr12	HAVANA	gene	13196723	13219941	+	-1.29329	6.53863	-26.3704	1.43306e-14	3.39089e-13	23.5859
ENSG00000141101.13	protein_coding	NOB1	2	OTTHUMG00000137576.4	chr16	HAVANA	gene	69741871	69754926	-	-1.38192	6.18496	-26.2936	1.49973e-14	3.52815e-13	23.5837
ENSG00000172009.15	protein_coding	THOP1	1	OTTHUMG00000180492.7	chr19	HAVANA	gene	2785503	2815807	+	-1.19937	6.71252	-26.4006	1.40767e-14	3.33643e-13	23.5814
ENSG00000228716.7	protein_coding	DHFR	2	OTTHUMG00000162529.3	chr5	HAVANA	gene	80626226	80654983	-	-1.51698	5.52451	-26.1431	1.64011e-14	3.81437e-13	23.5701
ENSG00000188807.13	protein_coding	TMEM201	2	OTTHUMG00000057457.3	chr1	HAVANA	gene	9588911	9614877	+	-2.10912	4.92622	-26.04	1.74428e-14	3.98837e-13	23.5692
ENSG00000162591.17	protein_coding	MEGF6	2	OTTHUMG00000000611.8	chr1	HAVANA	gene	3487951	3611508	-	3.23131	4.42814	26.0888	1.69414e-14	3.91733e-13	23.5682
ENSG00000025772.8	protein_coding	TOMM34	2	OTTHUMG00000032552.4	chr20	HAVANA	gene	44942130	44960397	-	-1.06928	7.44312	-26.5254	1.30786e-14	3.14949e-13	23.5675
ENSG00000213024.13	protein_coding	NUP62	2	OTTHUMG00000183077.4	chr19	HAVANA	gene	49906825	49929764	-	-1.28537	6.50624	-26.3317	1.46627e-14	3.45942e-13	23.5659
ENSG00000161405.17	protein_coding	IKZF3	2	OTTHUMG00000133250.5	chr17	HAVANA	gene	39757718	39864312	-	-1.60743	5.25165	-26.0882	1.69477e-14	3.91733e-13	23.5654
ENSG00000004455.18	protein_coding	AK2	1	OTTHUMG00000004131.7	chr1	HAVANA	gene	33007986	33080996	-	-0.994957	7.45132	-26.496	1.33065e-14	3.19493e-13	23.5478
ENSG00000102384.14	protein_coding	CENPI	2	OTTHUMG00000022018.2	chrX	HAVANA	gene	101098188	101166126	+	-1.80678	5.02828	-26.0196	1.76572e-14	4.02046e-13	23.5456
ENSG00000114796.16	protein_coding	KLHL24	2	OTTHUMG00000156911.6	chr3	HAVANA	gene	183635610	183684519	+	2.41444	4.23204	26.0217	1.76354e-14	4.02046e-13	23.5455
ENSG00000130713.17	protein_coding	EXOSC2	2	OTTHUMG00000020811.5	chr9	HAVANA	gene	130693721	130707288	+	-1.79029	5.68705	-26.0968	1.68611e-14	3.9102e-13	23.5309
ENSG00000187678.10	protein_coding	SPRY4	2	OTTHUMG00000129663.5	chr5	HAVANA	gene	142310427	142326455	-	-5.7047	3.39715	-28.1412	5.19398e-15	1.5094e-13	23.5166
ENSG00000179820.16	protein_coding	MYADM	2	OTTHUMG00000060775.8	chr19	HAVANA	gene	53864763	53876435	+	1.13604	7.30849	26.4002	1.408e-14	3.33643e-13	23.5146
ENSG00000042088.14	protein_coding	TDP1	2	OTTHUMG00000171016.4	chr14	HAVANA	gene	89954939	90044764	+	-1.55437	5.72128	-26.0806	1.70249e-14	3.92031e-13	23.5113
ENSG00000080345.18	protein_coding	RIF1	2	OTTHUMG00000131886.7	chr2	HAVANA	gene	151409883	151508013	+	-1.39854	6.66691	-26.2472	1.54163e-14	3.61628e-13	23.496
ENSG00000198805.13	protein_coding	PNP	1	OTTHUMG00000029546.4	chr14	HAVANA	gene	20461992	20477094	+	-1.40351	6.48369	-26.2031	1.58254e-14	3.70692e-13	23.4918
ENSG00000133119.13	protein_coding	RFC3	2	OTTHUMG00000016715.4	chr13	HAVANA	gene	33818069	33966558	+	-2.94304	4.04938	-25.9739	1.81485e-14	4.12083e-13	23.4909
ENSG00000135862.6	protein_coding	LAMC1	1	OTTHUMG00000035418.6	chr1	HAVANA	gene	183023420	183145592	+	1.20259	8.01386	26.4752	1.34708e-14	3.22488e-13	23.4737
ENSG00000184661.14	protein_coding	CDCA2	1	OTTHUMG00000099429.7	chr8	HAVANA	gene	25459199	25507911	+	-2.09069	4.94293	-25.8639	1.9389e-14	4.35999e-13	23.4613
ENSG00000112773.16	protein_coding	TENT5A	2	OTTHUMG00000015097.2	chr6	HAVANA	gene	81491439	81752774	-	2.33277	4.94601	25.8441	1.96217e-14	4.40018e-13	23.4596
ENSG00000127528.6	protein_coding	KLF2	2	OTTHUMG00000182330.1	chr19	HAVANA	gene	16324826	16328685	+	2.90174	4.31877	25.8475	1.95819e-14	4.3973e-13	23.434
ENSG00000122034.17	protein_coding	GTF3A	2	OTTHUMG00000016632.4	chr13	HAVANA	gene	27424619	27435823	+	-1.26259	6.36278	-26.0809	1.70221e-14	3.92031e-13	23.4285
ENSG00000163683.12	protein_coding	SMIM14	1	OTTHUMG00000128581.8	chr4	HAVANA	gene	39546336	39638902	-	4.30105	4.70975	25.8723	1.92907e-14	4.34388e-13	23.413
ENSG00000110944.9	protein_coding	IL23A	2	OTTHUMG00000187402.2	chr12	HAVANA	gene	56334174	56340410	+	2.74699	4.12994	25.8241	1.98597e-14	4.44103e-13	23.4
ENSG00000138182.15	protein_coding	KIF20B	2	OTTHUMG00000018725.2	chr10	HAVANA	gene	89701590	89774939	+	-2.26223	6.05175	-25.9037	1.89293e-14	4.28022e-13	23.3837
ENSG00000186603.7	protein_coding	HPDL	2	OTTHUMG00000007681.2	chr1	HAVANA	gene	45326895	45328710	+	-3.0908	3.70836	-25.9169	1.87803e-14	4.25698e-13	23.3733
ENSG00000009954.11	protein_coding	BAZ1B	2	OTTHUMG00000023847.6	chr7	HAVANA	gene	73440406	73522293	-	-1.05614	7.38154	-26.1988	1.5866e-14	3.7073e-13	23.3732
ENSG00000103089.9	protein_coding	FA2H	2	OTTHUMG00000137603.6	chr16	HAVANA	gene	74712955	74774831	-	2.39154	4.17515	25.716	2.12009e-14	4.6898e-13	23.361
ENSG00000176208.9	protein_coding	ATAD5	2	OTTHUMG00000132794.4	chr17	HAVANA	gene	30831966	30895869	+	-2.8828	4.24447	-25.6617	2.19106e-14	4.81412e-13	23.3345
ENSG00000145604.17	protein_coding	SKP2	2	OTTHUMG00000131106.9	chr5	HAVANA	gene	36151989	36196849	+	-1.76735	4.89903	-25.6503	2.20623e-14	4.84093e-13	23.328
ENSG00000104805.17	protein_coding	NUCB1	2	OTTHUMG00000152514.5	chr19	HAVANA	gene	48900050	48923473	+	1.18897	6.53538	25.9151	1.88004e-14	4.25698e-13	23.3126
ENSG00000134001.15	protein_coding	EIF2S1	2	OTTHUMG00000029800.7	chr14	HAVANA	gene	67360328	67386516	+	-1.04295	8.02271	-26.1981	1.58725e-14	3.7073e-13	23.2925
ENSG00000165949.13	protein_coding	IFI27	1	OTTHUMG00000171303.5	chr14	HAVANA	gene	94104836	94116695	+	2.29743	4.88047	25.5642	2.32495e-14	5.06057e-13	23.2908
ENSG00000152137.8	protein_coding	HSPB8	1	OTTHUMG00000168932.2	chr12	HAVANA	gene	119171555	119224855	+	4.47575	3.31642	26.9763	1.00536e-14	2.54904e-13	23.2885
ENSG00000130827.6	protein_coding	PLXNA3	2	OTTHUMG00000033290.6	chrX	HAVANA	gene	154458281	154477779	+	1.85577	7.62656	26.0746	1.7086e-14	3.92881e-13	23.2883
ENSG00000119335.18	protein_coding	SET	2	OTTHUMG00000020755.4	chr9	HAVANA	gene	128683424	128696400	+	-1.06513	8.92729	-26.3555	1.4457e-14	3.41584e-13	23.2743
ENSG00000135372.10	protein_coding	NAT10	1	OTTHUMG00000166249.4	chr11	HAVANA	gene	34105617	34147670	+	-1.19832	7.49092	-26.0553	1.72844e-14	3.96884e-13	23.2717
ENSG00000100297.16	protein_coding	MCM5	1	OTTHUMG00000150961.19	chr22	HAVANA	gene	35400134	35425431	+	-1.96101	6.02004	-25.7279	2.10492e-14	4.66256e-13	23.2684
ENSG00000131737.7	protein_coding	KRT34	2	OTTHUMG00000133436.3	chr17	HAVANA	gene	41377669	41382306	-	3.08631	4.46349	25.5525	2.34152e-14	5.08307e-13	23.2646
ENSG00000113552.16	protein_coding	GNPDA1	1	OTTHUMG00000129657.5	chr5	HAVANA	gene	141991749	142013041	-	-1.19078	6.51122	-25.8368	1.97086e-14	4.4136e-13	23.2566
ENSG00000185262.9	protein_coding	UBALD2	2	OTTHUMG00000132666.5	chr17	HAVANA	gene	76265348	76271298	+	-1.47572	5.49685	-25.6267	2.23807e-14	4.89761e-13	23.2535
ENSG00000074416.16	protein_coding	MGLL	1	OTTHUMG00000159641.6	chr3	HAVANA	gene	127689062	128052190	-	1.24192	7.63719	26.0419	1.74234e-14	3.98837e-13	23.2528
ENSG00000177409.12	protein_coding	SAMD9L	2	OTTHUMG00000155807.4	chr7	HAVANA	gene	93130056	93148385	-	2.98776	3.63082	25.8125	1.99987e-14	4.46018e-13	23.2472
ENSG00000148120.19	protein_coding	AOPEP	2	OTTHUMG00000020276.4	chr9	HAVANA	gene	94726604	95151793	+	1.97178	4.6821	25.481	2.44593e-14	5.28252e-13	23.2426
ENSG00000165434.8	protein_coding	PGM2L1	2	OTTHUMG00000168132.2	chr11	HAVANA	gene	74330316	74398433	-	2.21531	5.6623	25.5815	2.30055e-14	5.02088e-13	23.2421
ENSG00000108064.11	protein_coding	TFAM	2	OTTHUMG00000018270.2	chr10	HAVANA	gene	58385345	58399220	+	-1.90483	6.07888	-25.6801	2.16675e-14	4.77359e-13	23.2297
ENSG00000145014.18	protein_coding	TMEM44	1	OTTHUMG00000156023.3	chr3	HAVANA	gene	194587673	194633689	-	2.33401	4.26821	25.4667	2.46738e-14	5.32086e-13	23.2227
ENSG00000176915.15	protein_coding	ANKLE2	1	OTTHUMG00000168046.4	chr12	HAVANA	gene	132725503	132761832	-	1.06185	7.87574	26.034	1.75061e-14	3.99723e-13	23.2147
ENSG00000156535.15	protein_coding	CD109	2	OTTHUMG00000015040.6	chr6	HAVANA	gene	73695785	73828316	+	1.17899	7.789	25.9885	1.79894e-14	4.09039e-13	23.199
ENSG00000189067.14	protein_coding	LITAF	1	OTTHUMG00000177415.6	chr16	HAVANA	gene	11547722	11636381	-	1.09438	6.9597	25.8219	1.98856e-14	4.44103e-13	23.1979
ENSG00000198727.2	protein_coding	MT-CYB	3	NA	chrM	ENSEMBL	gene	14747	15887	+	0.834842	11.0606	26.7118	1.17247e-14	2.90135e-13	23.1956
ENSG00000133316.16	protein_coding	WDR74	1	OTTHUMG00000167695.4	chr11	HAVANA	gene	62832342	62841809	-	-1.35524	6.03567	-25.6344	2.22768e-14	4.88144e-13	23.1922
ENSG00000113407.14	protein_coding	TARS1	1	OTTHUMG00000090683.4	chr5	HAVANA	gene	33440696	33468091	+	-0.882856	8.76978	-26.1865	1.59824e-14	3.72761e-13	23.188
ENSG00000115295.21	protein_coding	CLIP4	1	OTTHUMG00000097837.5	chr2	HAVANA	gene	29097705	29199777	+	1.32111	6.93217	25.7918	2.02509e-14	4.5041e-13	23.1875
ENSG00000116455.14	protein_coding	WDR77	2	OTTHUMG00000011748.3	chr1	HAVANA	gene	111439890	111449256	-	-1.2277	6.32857	-25.6852	2.16e-14	4.7659e-13	23.1851
ENSG00000137054.16	protein_coding	POLR1E	2	OTTHUMG00000019920.4	chr9	HAVANA	gene	37485948	37503697	+	-1.76263	4.95594	-25.418	2.54215e-14	5.46044e-13	23.1802
ENSG00000070950.10	protein_coding	RAD18	2	OTTHUMG00000090545.6	chr3	HAVANA	gene	8775402	8963773	-	-2.13734	4.30297	-25.3324	2.6792e-14	5.69478e-13	23.1525
ENSG00000080986.13	protein_coding	NDC80	1	OTTHUMG00000131483.5	chr18	HAVANA	gene	2571557	2616635	+	-2.01458	4.83042	-25.3498	2.65064e-14	5.6488e-13	23.1505
ENSG00000035141.10	protein_coding	FAM136A	1	OTTHUMG00000129668.4	chr2	HAVANA	gene	70295976	70302067	-	-1.09621	6.82023	-25.685	2.16034e-14	4.7659e-13	23.121
ENSG00000143228.13	protein_coding	NUF2	1	OTTHUMG00000034275.4	chr1	HAVANA	gene	163266576	163355764	+	-2.54666	4.25845	-25.2794	2.76787e-14	5.83759e-13	23.1142
ENSG00000165689.17	protein_coding	ENTR1	2	OTTHUMG00000020928.14	chr9	HAVANA	gene	136401922	136410614	-	-1.22351	6.21391	-25.5241	2.38238e-14	5.16431e-13	23.0978
ENSG00000114686.9	protein_coding	MRPL3	1	OTTHUMG00000159607.7	chr3	HAVANA	gene	131462212	131502983	-	-1.13847	7.53904	-25.7843	2.03428e-14	4.51837e-13	23.0947
ENSG00000139354.11	protein_coding	GAS2L3	1	OTTHUMG00000170439.4	chr12	HAVANA	gene	100573683	100628288	+	-2.20062	4.73568	-25.2368	2.8416e-14	5.96224e-13	23.0877
ENSG00000107566.14	protein_coding	ERLIN1	2	OTTHUMG00000018900.4	chr10	HAVANA	gene	100150094	100186033	-	-1.22727	6.28707	-25.5221	2.38528e-14	5.16431e-13	23.0874
ENSG00000110108.10	protein_coding	TMEM109	2	OTTHUMG00000167801.2	chr11	HAVANA	gene	60914158	60923443	+	-1.33871	6.07735	-25.4589	2.47923e-14	5.33935e-13	23.076
ENSG00000172831.14	protein_coding	CES2	2	OTTHUMG00000137517.7	chr16	HAVANA	gene	66934444	66945096	+	1.3106	5.95839	25.4105	2.55376e-14	5.47815e-13	23.0712
ENSG00000080608.10	protein_coding	PUM3	2	OTTHUMG00000019450.5	chr9	HAVANA	gene	2720469	2844095	-	-1.37553	6.03719	-25.4345	2.51657e-14	5.41262e-13	23.0664
ENSG00000196878.15	protein_coding	LAMB3	2	OTTHUMG00000036360.5	chr1	HAVANA	gene	209614870	209652425	-	-0.818433	9.51935	-26.1325	1.65054e-14	3.83315e-13	23.0544
ENSG00000168906.13	protein_coding	MAT2A	1	OTTHUMG00000130174.7	chr2	HAVANA	gene	85539168	85545281	+	-1.13976	7.92006	-25.7939	2.02253e-14	4.5041e-13	23.0526
ENSG00000072274.14	protein_coding	TFRC	2	OTTHUMG00000155714.3	chr3	HAVANA	gene	196012511	196082153	-	-0.904088	9.13064	-26.0434	1.74078e-14	3.98837e-13	23.0509
ENSG00000175832.13	protein_coding	ETV4	1	OTTHUMG00000180884.2	chr17	HAVANA	gene	43527844	43579620	-	-5.41224	3.43271	-26.6843	1.19149e-14	2.93701e-13	23.0457
ENSG00000173638.19	protein_coding	SLC19A1	1	OTTHUMG00000090397.9	chr21	HAVANA	gene	45493572	45573365	-	-2.26076	4.49985	-25.098	3.09613e-14	6.41374e-13	23.0088
ENSG00000118523.6	protein_coding	CCN2	2	OTTHUMG00000015573.3	chr6	HAVANA	gene	131948176	131951372	-	-3.85597	3.21153	-25.8724	1.92902e-14	4.34388e-13	22.9973
ENSG00000221829.11	protein_coding	FANCG	2	OTTHUMG00000019850.4	chr9	HAVANA	gene	35073835	35080004	-	-1.81473	4.95801	-25.099	3.09439e-14	6.41374e-13	22.9813
ENSG00000116161.18	protein_coding	CACYBP	1	OTTHUMG00000034941.8	chr1	HAVANA	gene	174999163	175012027	+	-1.26516	6.5066	-25.3893	2.58719e-14	5.54257e-13	22.9759
ENSG00000135929.9	protein_coding	CYP27A1	1	OTTHUMG00000048238.7	chr2	HAVANA	gene	218781749	218815293	+	2.16106	4.30941	25.0372	3.21526e-14	6.62684e-13	22.9675
ENSG00000112715.26	protein_coding	VEGFA	2	OTTHUMG00000014745.14	chr6	HAVANA	gene	43770184	43786487	+	-1.71178	5.68186	-25.1874	2.92949e-14	6.10736e-13	22.9611
ENSG00000075275.18	protein_coding	CELSR1	1	OTTHUMG00000150423.5	chr22	HAVANA	gene	46360834	46537620	-	1.50251	5.8167	25.1919	2.92145e-14	6.09839e-13	22.9558
ENSG00000242125.3	lncRNA	SNHG3	2	OTTHUMG00000003657.2	chr1	HAVANA	gene	28505980	28510892	+	-1.74949	6.30932	-25.2948	2.74189e-14	5.80532e-13	22.952
ENSG00000120705.13	protein_coding	ETF1	1	OTTHUMG00000129199.6	chr5	HAVANA	gene	138506095	138543236	-	-0.899126	8.11137	-25.677	2.17083e-14	4.77611e-13	22.9518
ENSG00000198715.13	protein_coding	GLMP	2	OTTHUMG00000019789.8	chr1	HAVANA	gene	156290089	156295689	-	1.27656	6.19216	25.2427	2.83132e-14	5.94832e-13	22.9342
ENSG00000138031.15	protein_coding	ADCY3	1	OTTHUMG00000094765.7	chr2	HAVANA	gene	24819169	24920237	-	-1.33818	6.34325	-25.2543	2.81099e-14	5.92087e-13	22.912
ENSG00000261236.8	protein_coding	BOP1	2	OTTHUMG00000174603.5	chr8	HAVANA	gene	144262045	144291438	-	-1.30432	6.59061	-25.2983	2.73592e-14	5.80023e-13	22.9076
ENSG00000092199.19	protein_coding	HNRNPC	2	OTTHUMG00000170757.3	chr14	HAVANA	gene	21209136	21269494	-	-0.826386	8.90343	-25.769	2.05322e-14	4.55423e-13	22.9068
ENSG00000121957.15	protein_coding	GPSM2	2	OTTHUMG00000011730.5	chr1	HAVANA	gene	108875350	108934545	+	-1.57297	5.809	-25.0957	3.10068e-14	6.41503e-13	22.8837
ENSG00000155254.13	protein_coding	MARVELD1	2	OTTHUMG00000018865.7	chr10	HAVANA	gene	97713173	97718150	+	1.15715	6.66947	25.1982	2.91014e-14	6.08257e-13	22.8404
ENSG00000120694.20	protein_coding	HSPH1	1	OTTHUMG00000016685.6	chr13	HAVANA	gene	31134973	31162388	-	-1.01884	7.35	-25.3423	2.6629e-14	5.66753e-13	22.8357
ENSG00000109472.14	protein_coding	CPE	2	OTTHUMG00000150252.4	chr4	HAVANA	gene	165361194	165498547	+	3.17087	4.02722	24.9431	3.40922e-14	6.99127e-13	22.8328
ENSG00000163535.18	protein_coding	SGO2	2	OTTHUMG00000154535.3	chr2	HAVANA	gene	200510008	200584096	+	-2.22849	5.02023	-24.8454	3.62393e-14	7.3759e-13	22.8248
ENSG00000075651.17	protein_coding	PLD1	1	OTTHUMG00000156947.8	chr3	HAVANA	gene	171600404	171810950	-	2.38802	4.2129	24.8167	3.68957e-14	7.4908e-13	22.8224
ENSG00000164087.8	protein_coding	POC1A	2	OTTHUMG00000157817.2	chr3	HAVANA	gene	52075226	52154690	-	-1.90331	4.66733	-24.8078	3.7103e-14	7.5235e-13	22.8181
ENSG00000129484.14	protein_coding	PARP2	1	OTTHUMG00000166106.3	chr14	HAVANA	gene	20343615	20357904	+	-1.61858	5.29127	-24.8959	3.51118e-14	7.17328e-13	22.8173
ENSG00000164649.20	protein_coding	CDCA7L	1	OTTHUMG00000128429.8	chr7	HAVANA	gene	21900899	21945903	-	-1.31772	6.40747	-25.1197	3.05493e-14	6.35262e-13	22.817
ENSG00000120158.12	protein_coding	RCL1	2	OTTHUMG00000019474.5	chr9	HAVANA	gene	4792944	4885917	+	-1.8994	4.48715	-24.7882	3.75607e-14	7.59743e-13	22.8133
ENSG00000090273.14	protein_coding	NUDC	1	OTTHUMG00000004226.12	chr1	HAVANA	gene	26900238	26946871	+	-1.09618	7.65845	-25.3588	2.63612e-14	5.63998e-13	22.8081
ENSG00000107833.11	protein_coding	NPM3	2	OTTHUMG00000018942.2	chr10	HAVANA	gene	101781325	101783446	-	-1.56342	5.22131	-24.8607	3.5894e-14	7.31475e-13	22.8008
ENSG00000197879.17	protein_coding	MYO1C	2	OTTHUMG00000090323.17	chr17	HAVANA	gene	1464186	1492686	-	0.951812	8.84153	25.5672	2.32061e-14	5.05788e-13	22.7923
ENSG00000021355.13	protein_coding	SERPINB1	2	OTTHUMG00000014124.2	chr6	HAVANA	gene	2832332	2841959	-	1.4407	6.0103	24.922	3.45451e-14	7.06636e-13	22.7562
ENSG00000198355.5	protein_coding	PIM3	2	OTTHUMG00000150290.2	chr22	HAVANA	gene	49960768	49964072	+	1.27303	6.07109	24.927	3.44379e-14	7.05327e-13	22.7469
ENSG00000141279.18	protein_coding	NPEPPS	2	OTTHUMG00000165471.7	chr17	HAVANA	gene	47522942	47624665	+	0.79014	8.82735	25.4807	2.44636e-14	5.28252e-13	22.7367
ENSG00000184678.11	protein_coding	H2BC21	2	OTTHUMG00000012095.1	chr1	HAVANA	gene	149884459	149886682	-	3.64283	3.40014	25.2924	2.74594e-14	5.80636e-13	22.7309
ENSG00000006118.15	protein_coding	TMEM132A	1	OTTHUMG00000167803.2	chr11	HAVANA	gene	60924460	60937159	+	1.15965	6.97752	25.0833	3.12467e-14	6.45645e-13	22.7259
ENSG00000037474.15	protein_coding	NSUN2	1	OTTHUMG00000090455.3	chr5	HAVANA	gene	6599239	6633291	-	-0.961482	7.98789	-25.2888	2.75202e-14	5.81169e-13	22.7195
ENSG00000163435.16	protein_coding	ELF3	2	OTTHUMG00000035867.5	chr1	HAVANA	gene	202007945	202017183	+	4.0382	3.56402	25.2489	2.82041e-14	5.93306e-13	22.7142
ENSG00000070718.13	protein_coding	AP3M2	1	OTTHUMG00000164060.6	chr8	HAVANA	gene	42152946	42171673	+	-2.00815	4.78633	-24.6281	4.15433e-14	8.28984e-13	22.6986
ENSG00000145901.16	protein_coding	TNIP1	1	OTTHUMG00000163722.7	chr5	HAVANA	gene	151029945	151093577	-	0.947251	8.29964	25.3028	2.72838e-14	5.79176e-13	22.6934
ENSG00000102144.15	protein_coding	PGK1	2	OTTHUMG00000021888.3	chrX	HAVANA	gene	77910739	78129295	+	0.701645	9.7479	25.5992	2.27591e-14	4.97375e-13	22.6873
ENSG00000135404.12	protein_coding	CD63	1	OTTHUMG00000170454.5	chr12	HAVANA	gene	55725323	55729707	-	0.816975	8.65016	25.3564	2.63996e-14	5.6408e-13	22.6804
ENSG00000173821.20	protein_coding	RNF213	1	OTTHUMG00000161415.8	chr17	HAVANA	gene	80260852	80398794	+	1.28764	7.26713	25.0637	3.16274e-14	6.52685e-13	22.678
ENSG00000197448.14	protein_coding	GSTK1	2	OTTHUMG00000152637.8	chr7	HAVANA	gene	143244093	143270854	+	1.56987	7.128	25.0116	3.2669e-14	6.7163e-13	22.6694
ENSG00000177000.13	protein_coding	MTHFR	2	OTTHUMG00000002277.8	chr1	HAVANA	gene	11785723	11806455	-	2.31095	4.18543	24.5668	4.31838e-14	8.57233e-13	22.6673
ENSG00000067082.15	protein_coding	KLF6	2	OTTHUMG00000017567.2	chr10	HAVANA	gene	3775996	3785281	-	1.30382	6.92143	24.9726	3.34711e-14	6.87254e-13	22.665
ENSG00000114491.14	protein_coding	UMPS	2	OTTHUMG00000159431.5	chr3	HAVANA	gene	124730433	124749273	+	-1.40676	5.85322	-24.7642	3.81319e-14	7.69387e-13	22.6606
ENSG00000106462.12	protein_coding	EZH2	2	OTTHUMG00000158973.3	chr7	HAVANA	gene	148807257	148884321	-	-1.49905	5.67447	-24.7202	3.92015e-14	7.88041e-13	22.6567
ENSG00000110713.18	protein_coding	NUP98	1	OTTHUMG00000011846.9	chr11	HAVANA	gene	3671083	3797792	-	-0.934837	7.73508	-25.1392	3.01821e-14	6.28428e-13	22.6551
ENSG00000204856.12	protein_coding	FAM216A	2	OTTHUMG00000169526.3	chr12	HAVANA	gene	110468415	110490385	+	-3.04152	3.80442	-24.6433	4.11477e-14	8.22097e-13	22.6541
ENSG00000172840.7	protein_coding	PDP2	2	OTTHUMG00000137512.9	chr16	HAVANA	gene	66878589	66895754	+	-1.56689	5.14282	-24.6119	4.19714e-14	8.36503e-13	22.6489
ENSG00000107949.17	protein_coding	BCCIP	2	OTTHUMG00000019237.3	chr10	HAVANA	gene	125823546	125853695	+	-1.40047	6.08165	-24.7836	3.76703e-14	7.61015e-13	22.6437
ENSG00000142669.15	protein_coding	SH3BGRL3	2	OTTHUMG00000003381.3	chr1	HAVANA	gene	26280086	26281522	+	0.922097	8.3005	25.209	2.89076e-14	6.04982e-13	22.6322
ENSG00000171241.9	protein_coding	SHCBP1	1	OTTHUMG00000132540.5	chr16	HAVANA	gene	46578591	46621379	-	-2.06963	4.85629	-24.5279	4.42614e-14	8.70438e-13	22.6307
ENSG00000197498.13	protein_coding	RPF2	1	OTTHUMG00000015368.3	chr6	HAVANA	gene	110982015	111028263	+	-2.01235	5.10159	-24.545	4.37828e-14	8.64155e-13	22.6201
ENSG00000149503.13	protein_coding	INCENP	2	OTTHUMG00000167470.5	chr11	HAVANA	gene	62123998	62153169	+	-1.22091	6.48625	-24.8277	3.66423e-14	7.44863e-13	22.6158
ENSG00000127564.17	protein_coding	PKMYT1	1	OTTHUMG00000128975.4	chr16	HAVANA	gene	2968024	2980479	-	-1.96354	4.95919	-24.5169	4.457e-14	8.75452e-13	22.6133
ENSG00000114767.7	protein_coding	RRP9	2	OTTHUMG00000156930.2	chr3	HAVANA	gene	51933429	51941904	-	-1.40756	5.51017	-24.6036	4.21913e-14	8.3986e-13	22.5988
ENSG00000172379.22	protein_coding	ARNT2	1	OTTHUMG00000165478.9	chr15	HAVANA	gene	80404350	80597933	+	2.00432	4.94102	24.4549	4.63586e-14	9.04049e-13	22.5861
ENSG00000152818.20	protein_coding	UTRN	2	OTTHUMG00000015746.6	chr6	HAVANA	gene	144285335	144853034	+	1.5056	6.13037	24.6545	4.0856e-14	8.17271e-13	22.569
ENSG00000151690.15	protein_coding	MFSD6	1	OTTHUMG00000132671.5	chr2	HAVANA	gene	190408355	190509205	+	1.38905	6.41377	24.7111	3.94246e-14	7.91552e-13	22.5649
ENSG00000165271.17	protein_coding	NOL6	2	OTTHUMG00000000394.5	chr9	HAVANA	gene	33461353	33473930	-	-1.0557	7.1282	-24.8747	3.55811e-14	7.26007e-13	22.5612
ENSG00000100439.11	protein_coding	ABHD4	1	OTTHUMG00000028686.7	chr14	HAVANA	gene	22598290	22612963	+	1.67522	5.63842	24.5359	4.40368e-14	8.67641e-13	22.5602
ENSG00000125454.12	protein_coding	SLC25A19	1	OTTHUMG00000179607.4	chr17	HAVANA	gene	75272981	75289510	-	-3.0911	3.28962	-24.7062	3.95488e-14	7.93067e-13	22.5421
ENSG00000177169.10	protein_coding	ULK1	2	OTTHUMG00000168052.6	chr12	HAVANA	gene	131894622	131923150	+	2.00253	5.49284	24.4622	4.6146e-14	9.0098e-13	22.5407
ENSG00000142192.22	protein_coding	APP	1	OTTHUMG00000078438.11	chr21	HAVANA	gene	25880535	26171128	-	0.73004	9.67832	25.3532	2.6452e-14	5.64459e-13	22.5388
ENSG00000079616.14	protein_coding	KIF22	1	OTTHUMG00000097771.5	chr16	HAVANA	gene	29790727	29805385	+	-1.63762	5.43235	-24.4748	4.57785e-14	8.94876e-13	22.5296
ENSG00000114353.17	protein_coding	GNAI2	1	OTTHUMG00000156940.2	chr3	HAVANA	gene	50226292	50259362	+	0.867918	8.25235	25.0266	3.23663e-14	6.66248e-13	22.5192
ENSG00000167110.19	protein_coding	GOLGA2	2	OTTHUMG00000020732.11	chr9	HAVANA	gene	128255829	128276026	-	1.01554	7.19536	24.7981	3.73279e-14	7.55972e-13	22.509
ENSG00000125450.11	protein_coding	NUP85	1	OTTHUMG00000179482.4	chr17	HAVANA	gene	75205659	75235758	+	-1.3451	5.91929	-24.5456	4.37688e-14	8.64155e-13	22.508
ENSG00000121621.7	protein_coding	KIF18A	2	OTTHUMG00000166195.4	chr11	HAVANA	gene	28020619	28108156	-	-1.80922	5.04909	-24.37	4.89333e-14	9.5198e-13	22.5068
ENSG00000232445.2	lncRNA	EMSLR	2	OTTHUMG00000157105.4	chr7	HAVANA	gene	101308270	101314800	+	-3.607	3.31393	-24.7456	3.85795e-14	7.76495e-13	22.4919
ENSG00000164086.10	protein_coding	DUSP7	2	OTTHUMG00000157819.2	chr3	HAVANA	gene	52048919	52056571	-	-1.9815	4.81739	-24.3028	5.10803e-14	9.92565e-13	22.4864
ENSG00000141030.13	protein_coding	COPS3	1	OTTHUMG00000059281.7	chr17	HAVANA	gene	17246616	17281273	-	-1.20035	6.76477	-24.6846	4.00894e-14	8.02921e-13	22.4854
ENSG00000151725.12	protein_coding	CENPU	2	OTTHUMG00000160499.20	chr4	HAVANA	gene	184694085	184734130	-	-2.1397	4.48552	-24.2056	5.43607e-14	1.04141e-12	22.4443
ENSG00000189339.12	protein_coding	SLC35E2B	2	OTTHUMG00000078639.4	chr1	HAVANA	gene	1659529	1692795	-	1.42495	6.09204	24.4298	4.7105e-14	9.17506e-13	22.4246
ENSG00000143061.18	protein_coding	IGSF3	2	OTTHUMG00000022751.4	chr1	HAVANA	gene	116574399	116667755	-	2.79699	3.79672	24.2936	5.13806e-14	9.97211e-13	22.4233
ENSG00000134686.21	protein_coding	PHC2	2	OTTHUMG00000004133.1	chr1	HAVANA	gene	33323623	33431095	-	-1.08129	6.7299	-24.5635	4.32744e-14	8.57233e-13	22.4084
ENSG00000100029.18	protein_coding	PES1	1	OTTHUMG00000151077.6	chr22	HAVANA	gene	30576625	30607083	-	-1.12726	6.53574	-24.5086	4.48069e-14	8.77989e-13	22.3984
ENSG00000105928.16	protein_coding	GSDME	1	OTTHUMG00000023237.10	chr7	HAVANA	gene	24698355	24757940	-	1.42037	5.53538	24.2825	5.17481e-14	1.00315e-12	22.3982
ENSG00000142634.13	protein_coding	EFHD2	2	OTTHUMG00000002254.2	chr1	HAVANA	gene	15409888	15430339	+	-1.06667	6.96646	-24.5349	4.40659e-14	8.67641e-13	22.3587
ENSG00000080845.19	protein_coding	DLGAP4	2	OTTHUMG00000032390.6	chr20	HAVANA	gene	36306336	36528637	+	1.17488	6.88594	24.5004	4.50408e-14	8.81513e-13	22.3571
ENSG00000111540.16	protein_coding	RAB5B	1	OTTHUMG00000169682.4	chr12	HAVANA	gene	55973913	55996683	+	1.00733	7.41706	24.6008	4.2265e-14	8.40301e-13	22.3503
ENSG00000163947.12	protein_coding	ARHGEF3	1	OTTHUMG00000158857.9	chr3	HAVANA	gene	56727418	57079329	-	1.66911	5.4037	24.1611	5.59377e-14	1.06786e-12	22.3418
ENSG00000124784.9	protein_coding	RIOK1	2	OTTHUMG00000014207.3	chr6	HAVANA	gene	7389793	7418037	+	-1.79473	4.54677	-24.0276	6.09642e-14	1.14541e-12	22.322
ENSG00000138346.16	protein_coding	DNA2	2	OTTHUMG00000018352.6	chr10	HAVANA	gene	68414064	68472121	-	-2.23308	4.03901	-24.0102	6.16517e-14	1.15663e-12	22.3182
ENSG00000100342.22	protein_coding	APOL1	2	OTTHUMG00000030427.9	chr22	HAVANA	gene	36253071	36267530	+	1.52656	5.47263	24.1407	5.66761e-14	1.07943e-12	22.3156
ENSG00000268621.6	lncRNA	IGFL2-AS1	2	OTTHUMG00000182496.13	chr19	HAVANA	gene	46189029	46203160	-	3.14897	4.16143	24.0302	6.08618e-14	1.14541e-12	22.298
ENSG00000087269.16	protein_coding	NOP14	1	OTTHUMG00000159911.5	chr4	HAVANA	gene	2937933	2963406	-	-1.38487	6.2139	-24.2707	5.21374e-14	1.0095e-12	22.2888
ENSG00000120875.9	protein_coding	DUSP4	1	OTTHUMG00000133395.3	chr8	HAVANA	gene	29333064	29350684	-	-1.17666	6.15707	-24.2448	5.30111e-14	1.02398e-12	22.2747
ENSG00000160818.17	protein_coding	GPATCH4	1	OTTHUMG00000033203.4	chr1	HAVANA	gene	156594301	156601496	-	-1.33329	6.11247	-24.227	5.36209e-14	1.03331e-12	22.2721
ENSG00000062822.16	protein_coding	POLD1	1	OTTHUMG00000183037.11	chr19	HAVANA	gene	50384204	50418018	+	-1.4712	5.74626	-24.1261	5.72107e-14	1.08581e-12	22.2565
ENSG00000103423.14	protein_coding	DNAJA3	1	OTTHUMG00000129470.4	chr16	HAVANA	gene	4425805	4456775	+	-1.21637	5.94974	-24.1581	5.60433e-14	1.06863e-12	22.2453
ENSG00000138092.11	protein_coding	CENPO	1	OTTHUMG00000125525.4	chr2	HAVANA	gene	24793136	24822376	+	-1.48202	5.51598	-24.0636	5.95633e-14	1.12521e-12	22.2447
ENSG00000008083.14	protein_coding	JARID2	2	OTTHUMG00000014293.2	chr6	HAVANA	gene	15246069	15522042	+	1.32049	6.45466	24.237	5.32758e-14	1.02788e-12	22.2447
ENSG00000263528.8	protein_coding	IKBKE	2	OTTHUMG00000184613.2	chr1	HAVANA	gene	206470476	206496889	+	1.56687	5.80575	24.0913	5.8507e-14	1.10783e-12	22.243
ENSG00000136875.13	protein_coding	PRPF4	2	OTTHUMG00000020517.3	chr9	HAVANA	gene	113275642	113294009	+	-1.41102	6.28388	-24.215	5.40331e-14	1.03873e-12	22.2429
ENSG00000131470.15	protein_coding	PSMC3IP	2	OTTHUMG00000180247.2	chr17	HAVANA	gene	42572310	42577831	-	-2.36795	4.30771	-23.8852	6.68564e-14	1.24425e-12	22.2419
ENSG00000082153.18	protein_coding	BZW1	1	OTTHUMG00000154560.20	chr2	HAVANA	gene	200810594	200827338	+	-1.06982	8.04011	-24.565	4.32323e-14	8.57233e-13	22.2401
ENSG00000188976.11	protein_coding	NOC2L	2	OTTHUMG00000040720.2	chr1	HAVANA	gene	944203	959309	-	-0.98126	7.84134	-24.5113	4.47298e-14	8.77533e-13	22.2296
ENSG00000159259.8	protein_coding	CHAF1B	2	OTTHUMG00000086606.4	chr21	HAVANA	gene	36385392	36419015	+	-1.70627	5.0277	-23.9367	6.4659e-14	1.20749e-12	22.222
ENSG00000018408.15	protein_coding	WWTR1	1	OTTHUMG00000159614.13	chr3	HAVANA	gene	149517235	149736714	-	-1.43263	5.66308	-24.0369	6.05959e-14	1.14207e-12	22.2071
ENSG00000144283.23	protein_coding	PKP4	2	OTTHUMG00000153969.5	chr2	HAVANA	gene	158456952	158682879	+	-1.01529	6.90032	-24.2671	5.22589e-14	1.01065e-12	22.1887
ENSG00000225830.16	protein_coding	ERCC6	2	OTTHUMG00000018195.6	chr10	HAVANA	gene	49454168	49539538	-	1.30311	6.03572	24.0662	5.94604e-14	1.12457e-12	22.187
ENSG00000164687.11	protein_coding	FABP5	1	OTTHUMG00000134313.2	chr8	HAVANA	gene	81280536	81284777	+	-2.39314	3.72673	-23.8236	6.95889e-14	1.28629e-12	22.171
ENSG00000163191.6	protein_coding	S100A11	2	OTTHUMG00000013069.2	chr1	HAVANA	gene	152032506	152047907	-	0.891114	8.70239	24.5615	4.33281e-14	8.57254e-13	22.1537
ENSG00000115919.15	protein_coding	KYNU	1	OTTHUMG00000131829.6	chr2	HAVANA	gene	142877657	143055833	+	1.45231	5.49036	23.8879	6.67385e-14	1.24347e-12	22.1431
ENSG00000165704.15	protein_coding	HPRT1	2	OTTHUMG00000022452.2	chrX	HAVANA	gene	134460165	134520513	+	-1.41599	6.61689	-24.1293	5.70911e-14	1.0848e-12	22.1407
ENSG00000204767.4	protein_coding	INSYN2B	2	OTTHUMG00000163083.2	chr5	HAVANA	gene	169861303	169980495	-	-4.09313	2.91984	-24.7514	3.84382e-14	7.74608e-13	22.1397
ENSG00000188112.10	protein_coding	C6orf132	1	OTTHUMG00000014695.5	chr6	HAVANA	gene	42092233	42142620	-	1.2217	6.68752	24.1299	5.7071e-14	1.0848e-12	22.1382
ENSG00000161888.12	protein_coding	SPC24	1	OTTHUMG00000180798.2	chr19	HAVANA	gene	11131520	11155807	-	-2.21257	4.32793	-23.7259	7.41728e-14	1.36176e-12	22.1374
ENSG00000154556.20	protein_coding	SORBS2	1	OTTHUMG00000157215.10	chr4	HAVANA	gene	185585444	185956652	-	3.16449	3.60326	23.9427	6.44051e-14	1.20412e-12	22.1247
ENSG00000198938.2	protein_coding	MT-CO3	3	NA	chrM	ENSEMBL	gene	9207	9990	+	0.682491	11.8287	25.2184	2.87402e-14	6.02251e-13	22.1229
ENSG00000101596.17	protein_coding	SMCHD1	1	OTTHUMG00000178235.5	chr18	HAVANA	gene	2655726	2805017	+	-1.23738	6.26249	-24.0271	6.09838e-14	1.14541e-12	22.1162
ENSG00000168393.13	protein_coding	DTYMK	1	OTTHUMG00000133409.4	chr2	HAVANA	gene	241675747	241686944	-	-1.45222	5.62881	-23.8938	6.64858e-14	1.24018e-12	22.1161
ENSG00000141448.11	protein_coding	GATA6	2	OTTHUMG00000131767.4	chr18	HAVANA	gene	22169589	22202528	+	1.69009	5.12388	23.7448	7.32637e-14	1.3481e-12	22.0962
ENSG00000100075.10	protein_coding	SLC25A1	2	OTTHUMG00000150123.4	chr22	HAVANA	gene	19175581	19178739	-	1.19928	6.38427	24.0042	6.18908e-14	1.15978e-12	22.0949
ENSG00000084463.8	protein_coding	WBP11	2	OTTHUMG00000168737.5	chr12	HAVANA	gene	14784582	14803486	-	-1.09817	7.46204	-24.1992	5.45856e-14	1.04449e-12	22.0715
ENSG00000138674.17	protein_coding	SEC31A	1	OTTHUMG00000130297.12	chr4	HAVANA	gene	82818509	82901166	-	1.00462	7.62309	24.2133	5.40933e-14	1.03873e-12	22.065
ENSG00000138442.11	protein_coding	WDR12	2	OTTHUMG00000132855.5	chr2	HAVANA	gene	202874261	203014798	-	-1.51277	5.33983	-23.74	7.34919e-14	1.35078e-12	22.051
ENSG00000120053.12	protein_coding	GOT1	2	OTTHUMG00000018882.4	chr10	HAVANA	gene	99396870	99430624	-	-1.24254	5.83457	-23.8269	6.94394e-14	1.28498e-12	22.0391
ENSG00000152253.9	protein_coding	SPC25	2	OTTHUMG00000132181.10	chr2	HAVANA	gene	168834132	168913371	-	-2.5	4.17602	-23.5722	8.2044e-14	1.48124e-12	22.0368
ENSG00000163808.17	protein_coding	KIF15	2	OTTHUMG00000156307.8	chr3	HAVANA	gene	44761721	44873376	+	-2.37874	4.15704	-23.5473	8.3398e-14	1.50402e-12	22.0209
ENSG00000114790.13	protein_coding	ARHGEF26	2	OTTHUMG00000159098.4	chr3	HAVANA	gene	154121003	154257827	+	-1.41933	5.76629	-23.7636	7.23667e-14	1.3331e-12	22.0097
ENSG00000140545.16	protein_coding	MFGE8	1	OTTHUMG00000148682.9	chr15	HAVANA	gene	88898683	88913468	-	1.46102	6.07352	23.7889	7.11808e-14	1.31422e-12	22.0003
ENSG00000077514.9	protein_coding	POLD3	1	OTTHUMG00000165621.4	chr11	HAVANA	gene	74493851	74669117	+	-1.40829	5.28289	-23.646	7.81595e-14	1.42055e-12	21.9921
ENSG00000171960.12	protein_coding	PPIH	2	OTTHUMG00000007520.7	chr1	HAVANA	gene	42658335	42676758	+	-1.6164	4.8947	-23.5736	8.19654e-14	1.48124e-12	21.9912
ENSG00000174442.12	protein_coding	ZWILCH	2	OTTHUMG00000133194.8	chr15	HAVANA	gene	66504959	66550130	+	-1.78884	4.77412	-23.5168	8.50901e-14	1.52778e-12	21.9679
ENSG00000075420.13	protein_coding	FNDC3B	2	OTTHUMG00000156761.6	chr3	HAVANA	gene	172039578	172401669	+	1.04335	7.68725	24.0609	5.9667e-14	1.12587e-12	21.9544
ENSG00000075618.18	protein_coding	FSCN1	1	OTTHUMG00000090599.6	chr7	HAVANA	gene	5592816	5606655	+	0.935752	7.33828	23.9893	6.24926e-14	1.16971e-12	21.9503
ENSG00000159593.15	protein_coding	NAE1	1	OTTHUMG00000137513.8	chr16	HAVANA	gene	66802875	66873256	-	-1.18946	6.5779	-23.8452	6.86204e-14	1.27127e-12	21.9499
ENSG00000118263.16	protein_coding	KLF7	2	OTTHUMG00000132935.4	chr2	HAVANA	gene	207074137	207173856	-	2.84121	3.64949	23.5805	8.15979e-14	1.4781e-12	21.9491
ENSG00000052802.13	protein_coding	MSMO1	2	OTTHUMG00000161126.7	chr4	HAVANA	gene	165327667	165343164	+	2.57089	7.19747	23.8743	6.73308e-14	1.25165e-12	21.9397
ENSG00000159055.4	protein_coding	MIS18A	2	OTTHUMG00000085308.2	chr21	HAVANA	gene	32268228	32279049	-	-2.17112	3.91209	-23.4222	9.05843e-14	1.6e-12	21.9335
ENSG00000099812.9	protein_coding	MISP	2	OTTHUMG00000181786.7	chr19	HAVANA	gene	751112	764318	+	1.36572	6.29955	23.7181	7.45521e-14	1.36411e-12	21.9183
ENSG00000119899.13	protein_coding	SLC17A5	2	OTTHUMG00000015039.2	chr6	HAVANA	gene	73593379	73653992	-	1.68311	5.2826	23.4859	8.68465e-14	1.55518e-12	21.9046
ENSG00000105486.15	protein_coding	LIG1	2	OTTHUMG00000183187.3	chr19	HAVANA	gene	48115445	48170603	-	-1.44549	5.48289	-23.5231	8.47416e-14	1.5232e-12	21.8844
ENSG00000166311.10	protein_coding	SMPD1	1	OTTHUMG00000165453.7	chr11	HAVANA	gene	6390440	6394998	+	1.29135	5.90825	23.5862	8.12925e-14	1.47421e-12	21.8799
ENSG00000162512.16	protein_coding	SDC3	2	OTTHUMG00000043646.2	chr1	HAVANA	gene	30869466	30908758	-	1.64767	5.27793	23.4329	8.9942e-14	1.59557e-12	21.8682
ENSG00000165861.14	protein_coding	ZFYVE1	2	OTTHUMG00000171365.3	chr14	HAVANA	gene	72969451	73027131	-	1.62539	5.40478	23.4353	8.98023e-14	1.59539e-12	21.8542
ENSG00000181938.14	protein_coding	GINS3	1	OTTHUMG00000133486.4	chr16	HAVANA	gene	58295080	58406147	+	-1.87487	4.4546	-23.3076	9.77363e-14	1.71702e-12	21.8518
ENSG00000136891.14	protein_coding	TEX10	2	OTTHUMG00000020366.3	chr9	HAVANA	gene	100302077	100352942	-	-1.31479	5.68292	-23.5109	8.54237e-14	1.53208e-12	21.8468
ENSG00000075188.9	protein_coding	NUP37	2	OTTHUMG00000170478.5	chr12	HAVANA	gene	102073103	102120120	-	-1.70806	5.29019	-23.4157	9.09741e-14	1.60514e-12	21.8429
ENSG00000145741.17	protein_coding	BTF3	1	OTTHUMG00000102031.6	chr5	HAVANA	gene	73498408	73505667	+	-0.751581	9.25329	-24.2154	5.40191e-14	1.03873e-12	21.8418
ENSG00000135624.17	protein_coding	CCT7	2	OTTHUMG00000152765.8	chr2	HAVANA	gene	73233420	73253021	+	-0.835669	8.72676	-24.0934	5.84297e-14	1.10765e-12	21.8307
ENSG00000181143.17	protein_coding	MUC16	2	OTTHUMG00000169191.3	chr19	HAVANA	gene	8848844	9010390	-	3.30621	4.61239	23.2561	1.01148e-13	1.75666e-12	21.8279
ENSG00000179115.11	protein_coding	FARSA	2	OTTHUMG00000180569.4	chr19	HAVANA	gene	12922479	12934037	-	-1.01389	6.81321	-23.7106	7.49216e-14	1.36933e-12	21.824
ENSG00000050344.9	protein_coding	NFE2L3	2	OTTHUMG00000023882.5	chr7	HAVANA	gene	26152198	26187137	+	-1.55758	5.45373	-23.4226	9.05561e-14	1.6e-12	21.8228
ENSG00000167601.12	protein_coding	AXL	1	OTTHUMG00000182727.4	chr19	HAVANA	gene	41219223	41261766	+	-0.723022	9.39758	-24.211	5.41711e-14	1.039e-12	21.819
ENSG00000110492.17	protein_coding	MDK	2	OTTHUMG00000150315.6	chr11	HAVANA	gene	46380756	46383837	+	1.47471	5.79602	23.464	8.81141e-14	1.57169e-12	21.8176
ENSG00000167107.13	protein_coding	ACSF2	2	OTTHUMG00000162128.5	chr17	HAVANA	gene	50426158	50474845	+	1.7817	4.96422	23.3031	9.80293e-14	1.71846e-12	21.8176
ENSG00000188211.9	protein_coding	NCR3LG1	2	OTTHUMG00000165913.4	chr11	HAVANA	gene	17351800	17377341	+	-2.02526	4.54746	-23.2541	1.01286e-13	1.75666e-12	21.8126
ENSG00000167088.11	protein_coding	SNRPD1	1	OTTHUMG00000178934.4	chr18	HAVANA	gene	21612314	21633524	+	-1.56068	5.69198	-23.4428	8.93567e-14	1.59037e-12	21.8054
ENSG00000136527.19	protein_coding	TRA2B	2	OTTHUMG00000156641.3	chr3	HAVANA	gene	185914558	185938103	-	-1.07094	7.34381	-23.7815	7.15282e-14	1.31914e-12	21.8036
ENSG00000131236.18	protein_coding	CAP1	2	OTTHUMG00000004493.3	chr1	HAVANA	gene	40040233	40072649	+	0.764893	9.38199	24.1736	5.54893e-14	1.06054e-12	21.7997
ENSG00000186591.13	protein_coding	UBE2H	1	OTTHUMG00000157650.7	chr7	HAVANA	gene	129830732	129952960	-	1.04405	7.00243	23.6994	7.54694e-14	1.37626e-12	21.7996
ENSG00000111300.10	protein_coding	NAA25	2	OTTHUMG00000169638.4	chr12	HAVANA	gene	112026689	112108796	-	-1.32316	5.83986	-23.4642	8.80987e-14	1.57169e-12	21.7938
ENSG00000123219.13	protein_coding	CENPK	2	OTTHUMG00000131227.5	chr5	HAVANA	gene	65517766	65563168	-	-2.13001	4.60958	-23.2285	1.03025e-13	1.78492e-12	21.7932
ENSG00000051825.15	protein_coding	MPHOSPH9	1	OTTHUMG00000168849.9	chr12	HAVANA	gene	123152320	123244014	-	-1.50839	5.11767	-23.2918	9.87741e-14	1.72966e-12	21.7736
ENSG00000162522.11	protein_coding	KIAA1522	1	OTTHUMG00000008088.7	chr1	HAVANA	gene	32741830	32774970	+	1.20216	7.30804	23.6906	7.59065e-14	1.38269e-12	21.7557
ENSG00000161547.17	protein_coding	SRSF2	2	OTTHUMG00000177547.6	chr17	HAVANA	gene	76734115	76737333	-	-0.837766	8.21612	-23.8538	6.82376e-14	1.26562e-12	21.7357
ENSG00000091127.14	protein_coding	PUS7	2	OTTHUMG00000157399.3	chr7	HAVANA	gene	105439661	105522271	-	-1.50222	4.98597	-23.213	1.041e-13	1.79781e-12	21.7348
ENSG00000103034.15	protein_coding	NDRG4	1	OTTHUMG00000133485.18	chr16	HAVANA	gene	58462846	58513628	+	5.69896	2.96717	25.8729	1.92836e-14	4.34388e-13	21.7327
ENSG00000142627.13	protein_coding	EPHA2	2	OTTHUMG00000009527.3	chr1	HAVANA	gene	16124337	16156069	-	-1.00224	7.62636	-23.7206	7.44302e-14	1.36411e-12	21.7241
ENSG00000120526.12	protein_coding	NUDCD1	2	OTTHUMG00000164931.2	chr8	HAVANA	gene	109240919	109334121	-	-1.44831	5.39074	-23.2681	1.0034e-13	1.75144e-12	21.7224
ENSG00000168159.15	protein_coding	RNF187	2	OTTHUMG00000040043.6	chr1	HAVANA	gene	228487382	228499899	+	1.26671	6.47914	23.4649	8.80614e-14	1.57169e-12	21.7165
ENSG00000145022.5	protein_coding	TCTA	2	OTTHUMG00000156846.2	chr3	HAVANA	gene	49412212	49416476	+	1.25253	6.45408	23.4481	8.90423e-14	1.58651e-12	21.7084
ENSG00000170581.15	protein_coding	STAT2	1	OTTHUMG00000170760.12	chr12	HAVANA	gene	56341597	56360203	-	1.56037	6.46302	23.425	9.04144e-14	1.6e-12	21.7007
ENSG00000175305.18	protein_coding	CCNE2	2	OTTHUMG00000164696.1	chr8	HAVANA	gene	94879770	94896678	-	-2.81431	3.39969	-23.2004	1.04982e-13	1.80922e-12	21.6925
ENSG00000166165.14	protein_coding	CKB	2	OTTHUMG00000171786.3	chr14	HAVANA	gene	103519667	103522833	-	2.10705	4.14984	23.0441	1.16573e-13	1.99212e-12	21.6872
ENSG00000166986.15	protein_coding	MARS1	1	OTTHUMG00000169996.6	chr12	HAVANA	gene	57475445	57517569	+	-0.98758	7.73872	-23.6857	7.61518e-14	1.38561e-12	21.6852
ENSG00000107738.20	protein_coding	VSIR	2	OTTHUMG00000018426.5	chr10	HAVANA	gene	71747556	71773520	-	3.55292	3.30278	23.4849	8.69023e-14	1.55518e-12	21.6762
ENSG00000136492.10	protein_coding	BRIP1	1	OTTHUMG00000179233.3	chr17	HAVANA	gene	61679139	61863559	-	-1.9544	4.57076	-23.0245	1.18122e-13	2.01649e-12	21.6543
ENSG00000166908.18	protein_coding	PIP4K2C	1	OTTHUMG00000170144.5	chr12	HAVANA	gene	57591174	57603418	+	0.984035	7.26212	23.5347	8.40919e-14	1.51486e-12	21.6506
ENSG00000111679.17	protein_coding	PTPN6	1	OTTHUMG00000168518.4	chr12	HAVANA	gene	6946468	6961316	+	1.40992	6.00601	23.2609	1.00829e-13	1.75621e-12	21.6471
ENSG00000108671.11	protein_coding	PSMD11	1	OTTHUMG00000132811.7	chr17	HAVANA	gene	32444379	32483319	+	-0.81817	8.14632	-23.7087	7.50117e-14	1.36945e-12	21.6455
ENSG00000239306.5	protein_coding	RBM14	1	OTTHUMG00000140380.5	chr11	HAVANA	gene	66616626	66629934	+	-1.21074	6.38913	-23.3531	9.48276e-14	1.67132e-12	21.6391
ENSG00000197747.9	protein_coding	S100A10	2	OTTHUMG00000013068.3	chr1	HAVANA	gene	151982915	151993859	-	0.835088	7.91513	23.6391	7.8516e-14	1.42544e-12	21.6334
ENSG00000099783.13	protein_coding	HNRNPM	1	OTTHUMG00000182383.7	chr19	HAVANA	gene	8444767	8489114	+	-0.936649	8.35775	-23.7197	7.44745e-14	1.36411e-12	21.6258
ENSG00000134987.13	protein_coding	WDR36	1	OTTHUMG00000128790.7	chr5	HAVANA	gene	111092321	111130502	+	-1.30186	6.27018	-23.3036	9.80006e-14	1.71846e-12	21.6232
ENSG00000107937.19	protein_coding	GTPBP4	2	OTTHUMG00000017538.6	chr10	HAVANA	gene	988434	1019932	+	-1.23834	6.53704	-23.3503	9.5007e-14	1.67268e-12	21.6173
ENSG00000088367.23	protein_coding	EPB41L1	2	OTTHUMG00000032378.14	chr20	HAVANA	gene	36091504	36232799	+	1.72551	5.04852	23.0087	1.19384e-13	2.03378e-12	21.6065
ENSG00000151623.15	protein_coding	NR3C2	1	OTTHUMG00000161455.3	chr4	HAVANA	gene	148078762	148444698	-	3.52286	3.27593	23.3335	9.60686e-14	1.68954e-12	21.5799
ENSG00000125618.18	protein_coding	PAX8	1	OTTHUMG00000128529.12	chr2	HAVANA	gene	113215997	113278921	-	1.45251	6.02304	23.1566	1.08101e-13	1.85512e-12	21.574
ENSG00000116830.12	protein_coding	TTF2	2	OTTHUMG00000012030.6	chr1	HAVANA	gene	117060326	117107453	+	-1.26722	6.19337	-23.2103	1.04287e-13	1.79914e-12	21.5685
ENSG00000153187.21	protein_coding	HNRNPU	2	OTTHUMG00000040396.17	chr1	HAVANA	gene	244840638	244864560	-	-0.797455	9.52976	-23.8673	6.764e-14	1.25596e-12	21.5671
ENSG00000123505.19	protein_coding	AMD1	2	OTTHUMG00000015369.8	chr6	HAVANA	gene	110874770	110898879	+	-1.3605	6.62481	-23.2843	9.92686e-14	1.73646e-12	21.5618
ENSG00000086061.16	protein_coding	DNAJA1	2	OTTHUMG00000019760.2	chr9	HAVANA	gene	33025273	33039907	+	-0.881758	8.00777	-23.5263	8.45593e-14	1.5216e-12	21.5387
ENSG00000085872.15	protein_coding	CHERP	1	OTTHUMG00000169304.3	chr19	HAVANA	gene	16517894	16542437	-	-1.06201	6.60935	-23.2545	1.01257e-13	1.75666e-12	21.5377
ENSG00000204054.14	lncRNA	LINC00963	2	OTTHUMG00000020783.66	chr9	HAVANA	gene	129476946	129513687	+	2.20694	3.99935	22.8261	1.35067e-13	2.27011e-12	21.5359
ENSG00000070778.13	protein_coding	PTPN21	1	OTTHUMG00000170766.2	chr14	HAVANA	gene	88465778	88555007	-	1.66293	5.61796	22.9827	1.2149e-13	2.06533e-12	21.5169
ENSG00000244405.8	protein_coding	ETV5	2	OTTHUMG00000156639.5	chr3	HAVANA	gene	186046314	186110318	-	-6.32393	2.99476	-25.5595	2.33155e-14	5.06817e-13	21.5163
ENSG00000102401.20	protein_coding	ARMCX3	2	OTTHUMG00000022035.4	chrX	HAVANA	gene	101622797	101627843	+	1.49611	5.73366	22.9674	1.22749e-13	2.08239e-12	21.4839
ENSG00000178038.17	protein_coding	ALS2CL	2	OTTHUMG00000128673.8	chr3	HAVANA	gene	46668995	46693704	-	1.78461	6.91024	23.1714	1.07032e-13	1.84066e-12	21.4681
ENSG00000134291.12	protein_coding	TMEM106C	1	OTTHUMG00000169892.4	chr12	HAVANA	gene	47963569	47968878	+	-0.990296	7.1684	-23.2569	1.01092e-13	1.75666e-12	21.4637
ENSG00000161642.18	protein_coding	ZNF385A	2	OTTHUMG00000169840.2	chr12	HAVANA	gene	54369133	54391298	-	2.38334	3.74106	22.7419	1.43019e-13	2.39387e-12	21.4536
ENSG00000116560.12	protein_coding	SFPQ	2	OTTHUMG00000004157.8	chr1	HAVANA	gene	35176378	35193446	-	-0.863747	8.18619	-23.4347	8.98343e-14	1.59539e-12	21.4511
ENSG00000198900.7	protein_coding	TOP1	2	OTTHUMG00000033057.3	chr20	HAVANA	gene	41028822	41124487	+	-1.1507	7.35028	-23.2623	1.00733e-13	1.75621e-12	21.4452
ENSG00000171867.18	protein_coding	PRNP	2	OTTHUMG00000031786.5	chr20	HAVANA	gene	4686350	4701590	+	-1.26158	7.14496	-23.2182	1.03738e-13	1.79347e-12	21.4431
ENSG00000139343.11	protein_coding	SNRPF	2	OTTHUMG00000170351.1	chr12	HAVANA	gene	95858952	95903828	+	-1.47209	5.51711	-22.8775	1.30441e-13	2.19914e-12	21.4356
ENSG00000130935.10	protein_coding	NOL11	1	OTTHUMG00000179777.3	chr17	HAVANA	gene	67717931	67744531	+	-1.2036	6.6612	-23.1139	1.11239e-13	1.90698e-12	21.4349
ENSG00000141524.19	protein_coding	TMC6	2	OTTHUMG00000177466.6	chr17	HAVANA	gene	78107397	78132407	-	1.89828	6.08678	22.9321	1.25712e-13	2.12823e-12	21.426
ENSG00000113048.19	protein_coding	MRPS27	2	OTTHUMG00000100951.9	chr5	HAVANA	gene	72214953	72321717	-	-1.02974	7.27852	-23.2212	1.03533e-13	1.79183e-12	21.4246
ENSG00000100462.16	protein_coding	PRMT5	1	OTTHUMG00000028709.11	chr14	HAVANA	gene	22920525	22929408	-	-1.17726	6.82207	-23.1044	1.11946e-13	1.91708e-12	21.4059
ENSG00000074527.13	protein_coding	NTN4	1	OTTHUMG00000170290.5	chr12	HAVANA	gene	95657807	95791189	-	2.12326	4.39521	22.6225	1.55159e-13	2.5733e-12	21.3991
ENSG00000122218.17	protein_coding	COPA	2	OTTHUMG00000033111.9	chr1	HAVANA	gene	160288594	160343566	-	0.90868	8.63136	23.429	9.01732e-14	1.59793e-12	21.3928
ENSG00000080839.12	protein_coding	RBL1	2	OTTHUMG00000032406.5	chr20	HAVANA	gene	36996349	37095997	-	-1.86499	4.48287	-22.633	1.54048e-13	2.5582e-12	21.3899
ENSG00000035681.9	protein_coding	NSMAF	2	OTTHUMG00000164352.6	chr8	HAVANA	gene	58583508	58659853	-	-1.18275	6.09037	-22.9193	1.26801e-13	2.14443e-12	21.3779
ENSG00000161692.18	protein_coding	DBF4B	2	OTTHUMG00000165717.3	chr17	HAVANA	gene	44708608	44752264	+	-1.73989	4.77469	-22.6493	1.52344e-13	2.53435e-12	21.3734
ENSG00000153574.9	protein_coding	RPIA	2	OTTHUMG00000130333.3	chr2	HAVANA	gene	88691673	88750929	+	-2.20237	4.00487	-22.5749	1.60299e-13	2.65315e-12	21.3703
ENSG00000113649.14	protein_coding	TCERG1	2	OTTHUMG00000129683.4	chr5	HAVANA	gene	146447311	146511961	+	-1.28371	6.50808	-22.9766	1.21996e-13	2.07177e-12	21.3615
ENSG00000187134.14	protein_coding	AKR1C1	2	OTTHUMG00000017580.4	chr10	HAVANA	gene	4963253	4983283	+	2.93251	3.44657	22.7367	1.43525e-13	2.39988e-12	21.3522
ENSG00000172301.11	protein_coding	COPRS	2	OTTHUMG00000132812.4	chr17	HAVANA	gene	31851871	31859291	-	-1.19024	5.92577	-22.8126	1.36302e-13	2.2885e-12	21.3261
ENSG00000232956.10	lncRNA	SNHG15	2	OTTHUMG00000179544.6	chr7	HAVANA	gene	44983019	44986961	-	-2.39715	4.37379	-22.5006	1.68692e-13	2.77515e-12	21.3134
ENSG00000104969.11	protein_coding	SGTA	2	OTTHUMG00000180474.5	chr19	HAVANA	gene	2754715	2783362	-	-0.936877	7.16759	-23.022	1.18322e-13	2.01779e-12	21.2985
ENSG00000128708.13	protein_coding	HAT1	2	OTTHUMG00000132282.6	chr2	HAVANA	gene	171922448	171983686	+	-1.27723	6.41487	-22.8585	1.32127e-13	2.22528e-12	21.2914
ENSG00000122565.19	protein_coding	CBX3	2	OTTHUMG00000022911.6	chr7	HAVANA	gene	26201162	26213607	+	-1.17654	8.06969	-23.1665	1.07383e-13	1.84475e-12	21.2824
ENSG00000032444.17	protein_coding	PNPLA6	1	OTTHUMG00000182094.3	chr19	HAVANA	gene	7534004	7561764	+	1.07729	6.74435	22.8811	1.30123e-13	2.19606e-12	21.2673
ENSG00000166801.17	protein_coding	FAM111A	2	OTTHUMG00000167280.6	chr11	HAVANA	gene	59142748	59155039	+	-1.1615	6.18965	-22.7755	1.39786e-13	2.34216e-12	21.2621
ENSG00000183207.15	protein_coding	RUVBL2	2	OTTHUMG00000183333.2	chr19	HAVANA	gene	48993562	49015970	+	-0.904715	7.35871	-23.0024	1.19889e-13	2.04023e-12	21.2592
ENSG00000119285.11	protein_coding	HEATR1	2	OTTHUMG00000040061.4	chr1	HAVANA	gene	236549005	236604516	-	-1.06822	6.8608	-22.9052	1.28016e-13	2.16274e-12	21.2588
ENSG00000187741.16	protein_coding	FANCA	2	OTTHUMG00000173049.7	chr16	HAVANA	gene	89726683	89816977	-	-2.17361	4.57486	-22.426	1.77581e-13	2.898e-12	21.2452
ENSG00000107815.10	protein_coding	TWNK	2	OTTHUMG00000018917.5	chr10	HAVANA	gene	100987367	100994403	+	-1.76659	4.71001	-22.4355	1.76422e-13	2.88197e-12	21.2307
ENSG00000148344.11	protein_coding	PTGES	2	OTTHUMG00000020791.5	chr9	HAVANA	gene	129738331	129753042	-	2.53401	3.57311	22.4493	1.74756e-13	2.86337e-12	21.2276
ENSG00000047849.22	protein_coding	MAP4	1	OTTHUMG00000156828.7	chr3	HAVANA	gene	47850690	48089272	-	0.823188	8.70704	23.1975	1.05183e-13	1.81078e-12	21.2195
ENSG00000104368.19	protein_coding	PLAT	1	OTTHUMG00000164072.3	chr8	HAVANA	gene	42174718	42207709	-	-3.07705	3.50083	-22.4585	1.73652e-13	2.84814e-12	21.2154
ENSG00000118418.16	protein_coding	HMGN3	2	OTTHUMG00000015073.1	chr6	HAVANA	gene	79201245	79234689	-	1.39398	5.45799	22.5329	1.64982e-13	2.72237e-12	21.2127
ENSG00000196743.9	protein_coding	GM2A	2	OTTHUMG00000130124.4	chr5	HAVANA	gene	151212150	151270440	+	1.34706	5.48241	22.529	1.65429e-13	2.72698e-12	21.2048
ENSG00000185215.11	protein_coding	TNFAIP2	2	OTTHUMG00000171890.4	chr14	HAVANA	gene	103121476	103137439	+	1.51421	6.23687	22.667	1.50511e-13	2.50642e-12	21.2019
ENSG00000197956.10	protein_coding	S100A6	2	OTTHUMG00000013549.5	chr1	HAVANA	gene	153534599	153536244	-	0.748309	9.28123	23.2741	9.99412e-14	1.74635e-12	21.1936
ENSG00000071967.12	protein_coding	CYBRD1	1	OTTHUMG00000132260.4	chr2	HAVANA	gene	171522247	171558129	+	1.31274	6.13427	22.6147	1.55993e-13	2.5845e-12	21.1724
ENSG00000123933.17	protein_coding	MXD4	2	OTTHUMG00000090243.6	chr4	HAVANA	gene	2247432	2262109	-	2.16677	3.98529	22.2576	1.99534e-13	3.20178e-12	21.15
ENSG00000167779.9	protein_coding	IGFBP6	1	OTTHUMG00000169773.4	chr12	HAVANA	gene	53097436	53102345	+	2.42552	3.82275	22.2748	1.97169e-13	3.17157e-12	21.1468
ENSG00000160633.13	protein_coding	SAFB	2	OTTHUMG00000180502.4	chr19	HAVANA	gene	5623035	5668478	+	-1.0956	6.60402	-22.6715	1.50045e-13	2.50377e-12	21.1286
ENSG00000173548.9	protein_coding	SNX33	2	OTTHUMG00000142835.2	chr15	HAVANA	gene	75647912	75662301	+	1.62815	5.21387	22.3563	1.86348e-13	3.02821e-12	21.1274
ENSG00000125170.11	protein_coding	DOK4	2	OTTHUMG00000133460.9	chr16	HAVANA	gene	57471922	57487327	-	2.3755	3.91548	22.2329	2.02998e-13	3.2414e-12	21.1265
ENSG00000040275.17	protein_coding	SPDL1	1	OTTHUMG00000130438.7	chr5	HAVANA	gene	169583636	169604778	+	-2.08552	3.86959	-22.2205	2.04751e-13	3.26248e-12	21.1258
ENSG00000137845.15	protein_coding	ADAM10	1	OTTHUMG00000132633.11	chr15	HAVANA	gene	58588809	58749791	-	1.07436	7.50492	22.8272	1.34964e-13	2.27011e-12	21.1239
ENSG00000163584.18	protein_coding	RPL22L1	2	OTTHUMG00000158957.3	chr3	HAVANA	gene	170864875	170870208	-	-1.80804	4.89898	-22.3033	1.93316e-13	3.12042e-12	21.1186
ENSG00000155506.19	protein_coding	LARP1	1	OTTHUMG00000130191.4	chr5	HAVANA	gene	154682986	154817605	+	-0.827364	8.90299	-23.0656	1.14898e-13	1.96556e-12	21.0952
ENSG00000120254.16	protein_coding	MTHFD1L	2	OTTHUMG00000015828.4	chr6	HAVANA	gene	150865679	151101887	+	-1.25379	5.58029	-22.3616	1.85661e-13	3.02078e-12	21.0562
ENSG00000105974.13	protein_coding	CAV1	1	OTTHUMG00000023413.9	chr7	HAVANA	gene	116524994	116561179	+	1.12284	8.62418	22.9408	1.24973e-13	2.11792e-12	21.0537
ENSG00000148019.14	protein_coding	CEP78	2	OTTHUMG00000020062.14	chr9	HAVANA	gene	78236062	78279690	+	-1.81719	4.85001	-22.2037	2.07158e-13	3.2885e-12	21.0535
ENSG00000124813.23	protein_coding	RUNX2	2	OTTHUMG00000014774.10	chr6	HAVANA	gene	45328157	45664349	+	1.6594	6.09739	22.422	1.78071e-13	2.90309e-12	21.052
ENSG00000102054.18	protein_coding	RBBP7	1	OTTHUMG00000021198.5	chrX	HAVANA	gene	16839283	16870362	-	-0.847768	7.88239	-22.7808	1.39286e-13	2.33619e-12	21.0313
ENSG00000149554.15	protein_coding	CHEK1	2	OTTHUMG00000165853.13	chr11	HAVANA	gene	125625163	125676255	+	-1.25158	6.03041	-22.3967	1.81213e-13	2.95137e-12	21.0166
ENSG00000124571.18	protein_coding	XPO5	2	OTTHUMG00000014742.11	chr6	HAVANA	gene	43522334	43576038	-	-1.28245	6.6136	-22.5116	1.6742e-13	2.75703e-12	21.0163
ENSG00000205978.6	protein_coding	NYNRIN	2	OTTHUMG00000171314.3	chr14	HAVANA	gene	24399003	24419283	+	2.56856	3.51646	22.1456	2.15724e-13	3.4112e-12	21.0136
ENSG00000105364.14	protein_coding	MRPL4	2	OTTHUMG00000180400.3	chr19	HAVANA	gene	10251901	10260055	+	-1.06651	6.45295	-22.4471	1.75019e-13	2.8648e-12	20.9886
ENSG00000105355.9	protein_coding	PLIN3	1	OTTHUMG00000180249.3	chr19	HAVANA	gene	4838341	4867694	-	0.940463	7.49397	22.6326	1.54092e-13	2.5582e-12	20.9843
ENSG00000119787.14	protein_coding	ATL2	2	OTTHUMG00000102074.10	chr2	HAVANA	gene	38293954	38377285	-	-1.25374	5.89906	-22.3211	1.90939e-13	3.09125e-12	20.9814
ENSG00000141736.14	protein_coding	ERBB2	1	OTTHUMG00000179300.3	chr17	HAVANA	gene	39687914	39730426	+	1.02996	7.08202	22.5442	1.63716e-13	2.70422e-12	20.9788
ENSG00000142230.13	protein_coding	SAE1	1	OTTHUMG00000183464.5	chr19	HAVANA	gene	47113274	47210636	+	-0.86199	7.71937	-22.6684	1.50363e-13	2.50642e-12	20.9731
ENSG00000135452.10	protein_coding	TSPAN31	1	OTTHUMG00000170381.3	chr12	HAVANA	gene	57738013	57750219	+	1.62653	5.00873	22.0773	2.26268e-13	3.56067e-12	20.9533
ENSG00000131462.9	protein_coding	TUBG1	1	OTTHUMG00000180277.4	chr17	HAVANA	gene	42609641	42615238	+	-1.00298	6.91934	-22.4644	1.72947e-13	2.83944e-12	20.9354
ENSG00000198056.16	protein_coding	PRIM1	1	OTTHUMG00000170034.8	chr12	HAVANA	gene	56730438	56752374	-	-2.74087	3.6906	-21.965	2.44832e-13	3.82327e-12	20.928
ENSG00000141994.16	protein_coding	DUS3L	2	OTTHUMG00000162311.5	chr19	HAVANA	gene	5784832	5791225	-	-1.46778	5.73174	-22.2005	2.07628e-13	3.28956e-12	20.924
ENSG00000029993.15	protein_coding	HMGB3	2	OTTHUMG00000024162.3	chrX	HAVANA	gene	150980509	150990771	+	-1.00992	7.19396	-22.4934	1.69524e-13	2.78604e-12	20.9193
ENSG00000140416.25	protein_coding	TPM1	2	OTTHUMG00000132803.19	chr15	HAVANA	gene	63042620	63071915	+	0.780671	8.34193	22.6977	1.47385e-13	2.4619e-12	20.9138
ENSG00000156508.19	protein_coding	EEF1A1	2	OTTHUMG00000015031.7	chr6	HAVANA	gene	73489308	73525587	-	0.409528	12.4097	23.5751	8.1886e-14	1.48124e-12	20.9133
ENSG00000164050.13	protein_coding	PLXNB1	2	OTTHUMG00000133527.6	chr3	HAVANA	gene	48403854	48430086	-	1.42096	6.58512	22.3362	1.88949e-13	3.06511e-12	20.9104
ENSG00000166272.18	protein_coding	WBP1L	2	OTTHUMG00000018968.5	chr10	HAVANA	gene	102743948	102834516	+	1.13057	6.06473	22.2352	2.02666e-13	3.23929e-12	20.9046
ENSG00000163297.18	protein_coding	ANTXR2	2	OTTHUMG00000151982.4	chr4	HAVANA	gene	79901146	80125454	-	-1.25785	5.96866	-22.2194	2.04918e-13	3.26248e-12	20.898
ENSG00000142207.7	protein_coding	URB1	1	OTTHUMG00000064919.4	chr21	HAVANA	gene	32311018	32393012	-	-1.05565	6.63948	-22.3552	1.86488e-13	3.02821e-12	20.8959
ENSG00000154839.10	protein_coding	SKA1	2	OTTHUMG00000132685.8	chr18	HAVANA	gene	50375040	50394168	+	-2.12869	4.08116	-21.892	2.57759e-13	3.99073e-12	20.8953
ENSG00000137207.12	protein_coding	YIPF3	1	OTTHUMG00000014738.6	chr6	HAVANA	gene	43511832	43516985	-	1.02323	6.63165	22.334	1.8924e-13	3.06677e-12	20.8909
ENSG00000114999.8	protein_coding	TTL	2	OTTHUMG00000131316.4	chr2	HAVANA	gene	112482156	112541739	+	-1.07131	6.31343	-22.2741	1.97262e-13	3.17157e-12	20.8839
ENSG00000095002.15	protein_coding	MSH2	1	OTTHUMG00000128861.10	chr2	HAVANA	gene	47403067	47663146	+	-1.39386	6.17603	-22.2225	2.04464e-13	3.26162e-12	20.8735
ENSG00000187840.5	protein_coding	EIF4EBP1	2	OTTHUMG00000164012.2	chr8	HAVANA	gene	38030534	38060365	+	-1.15184	6.01721	-22.1759	2.1122e-13	3.34322e-12	20.857
ENSG00000146376.11	protein_coding	ARHGAP18	2	OTTHUMG00000015547.3	chr6	HAVANA	gene	129576132	129710177	-	-1.60224	5.59876	-22.0687	2.2765e-13	3.57895e-12	20.852
ENSG00000140931.20	protein_coding	CMTM3	1	OTTHUMG00000137503.9	chr16	HAVANA	gene	66603874	66613892	+	1.42273	5.46491	22.0154	2.36315e-13	3.70803e-12	20.8421
ENSG00000099337.5	protein_coding	KCNK6	2	OTTHUMG00000182325.3	chr19	HAVANA	gene	38319845	38332076	+	1.55617	4.91904	21.901	2.56114e-13	3.97437e-12	20.8347
ENSG00000123843.13	protein_coding	C4BPB	2	OTTHUMG00000036035.9	chr1	HAVANA	gene	207088860	207099993	+	1.82035	5.61131	22.0043	2.3816e-13	3.7298e-12	20.8285
ENSG00000164761.9	protein_coding	TNFRSF11B	2	OTTHUMG00000164969.2	chr8	HAVANA	gene	118923557	118951885	-	1.3049	6.06157	22.1215	2.19384e-13	3.46236e-12	20.8283
ENSG00000147274.14	protein_coding	RBMX	2	OTTHUMG00000022517.2	chrX	HAVANA	gene	136848004	136880764	-	-0.836515	8.2072	-22.5505	1.63e-13	2.69512e-12	20.822
ENSG00000139618.18	protein_coding	BRCA2	2	OTTHUMG00000017411.8	chr13	HAVANA	gene	32315086	32400268	+	-2.19705	4.1247	-21.7872	2.7758e-13	4.27326e-12	20.8204
ENSG00000180448.11	protein_coding	ARHGAP45	1	OTTHUMG00000181871.5	chr19	HAVANA	gene	1065923	1086628	+	1.41023	5.5662	21.9828	2.41787e-13	3.77992e-12	20.8036
ENSG00000102900.13	protein_coding	NUP93	1	OTTHUMG00000133278.13	chr16	HAVANA	gene	56730118	56850286	+	-1.06639	6.2969	-22.1386	2.16789e-13	3.42472e-12	20.7877
ENSG00000112378.12	protein_coding	PERP	2	OTTHUMG00000015668.3	chr6	HAVANA	gene	138088505	138107419	-	1.4695	7.17015	22.2802	1.96431e-13	3.16444e-12	20.7857
ENSG00000145113.22	protein_coding	MUC4	1	OTTHUMG00000151827.7	chr3	HAVANA	gene	195746765	195811973	-	1.9237	4.58197	21.7426	2.8651e-13	4.37357e-12	20.7647
ENSG00000182197.13	protein_coding	EXT1	2	OTTHUMG00000059718.6	chr8	HAVANA	gene	117794490	118111826	-	0.940277	7.41214	22.3103	1.92377e-13	3.11144e-12	20.7628
ENSG00000228649.11	lncRNA	SNHG26	2	OTTHUMG00000152563.18	chr7	HAVANA	gene	22854126	22872952	+	-1.925	4.37743	-21.7052	2.94219e-13	4.47449e-12	20.7435
ENSG00000165102.15	protein_coding	HGSNAT	1	OTTHUMG00000164102.3	chr8	HAVANA	gene	43140464	43202855	+	1.13213	6.0584	21.9826	2.41824e-13	3.77992e-12	20.7218
ENSG00000139318.8	protein_coding	DUSP6	2	OTTHUMG00000169912.5	chr12	HAVANA	gene	89347235	89352501	-	-6.45467	2.62148	-25.1094	3.0744e-14	6.38496e-13	20.713
ENSG00000156966.7	protein_coding	B3GNT7	1	OTTHUMG00000153880.2	chr2	HAVANA	gene	231395710	231401164	+	2.68687	3.46455	21.7186	2.91422e-13	4.43609e-12	20.7064
ENSG00000135506.17	protein_coding	OS9	1	OTTHUMG00000170284.3	chr12	HAVANA	gene	57693841	57728342	+	0.853102	7.4562	22.2396	2.02049e-13	3.23381e-12	20.704
ENSG00000047597.7	protein_coding	XK	2	OTTHUMG00000033171.4	chrX	HAVANA	gene	37685791	37732130	+	-2.04201	3.83333	-21.6128	3.1426e-13	4.74827e-12	20.6998
ENSG00000143977.14	protein_coding	SNRPG	1	OTTHUMG00000129670.5	chr2	HAVANA	gene	70281362	70293740	-	-1.25198	5.78327	-21.8935	2.57484e-13	3.99027e-12	20.6876
ENSG00000063601.17	protein_coding	MTMR1	2	OTTHUMG00000024159.7	chrX	HAVANA	gene	150692971	150765108	+	-1.07766	7.46004	-22.216	2.05402e-13	3.26544e-12	20.6829
ENSG00000171320.15	protein_coding	ESCO2	2	OTTHUMG00000163901.3	chr8	HAVANA	gene	27771949	27812640	+	-2.28156	3.81289	-21.5907	3.19261e-13	4.81491e-12	20.6829
ENSG00000130724.10	protein_coding	CHMP2A	2	OTTHUMG00000183547.4	chr19	HAVANA	gene	58551452	58555105	-	1.23904	5.84089	21.8572	2.64155e-13	4.07815e-12	20.6657
ENSG00000160214.13	protein_coding	RRP1	2	OTTHUMG00000086884.3	chr21	HAVANA	gene	43789513	43805293	+	-1.44146	5.46611	-21.7782	2.79347e-13	4.29641e-12	20.6543
ENSG00000197903.8	protein_coding	H2BC12	2	OTTHUMG00000014473.2	chr6	HAVANA	gene	27146361	27146855	-	1.64526	4.55694	21.5843	3.20712e-13	4.83232e-12	20.6455
ENSG00000071794.16	protein_coding	HLTF	1	OTTHUMG00000159534.5	chr3	HAVANA	gene	149030127	149086554	-	-1.18102	7.10032	-22.0925	2.23882e-13	3.52652e-12	20.6428
ENSG00000049239.13	protein_coding	H6PD	1	OTTHUMG00000001768.2	chr1	HAVANA	gene	9234774	9271337	+	1.57314	5.43893	21.7227	2.90576e-13	4.42735e-12	20.6372
ENSG00000116237.16	protein_coding	ICMT	2	OTTHUMG00000001254.3	chr1	HAVANA	gene	6221193	6235972	-	-0.968786	7.23768	-22.1124	2.20781e-13	3.48104e-12	20.6362
ENSG00000100591.8	protein_coding	AHSA1	1	OTTHUMG00000171539.3	chr14	HAVANA	gene	77457870	77469472	+	-0.789663	7.81266	-22.2013	2.07505e-13	3.28956e-12	20.6217
ENSG00000042445.14	protein_coding	RETSAT	1	OTTHUMG00000154611.6	chr2	HAVANA	gene	85341955	85354531	-	1.23324	6.24582	21.8787	2.6018e-13	4.02439e-12	20.621
ENSG00000130787.14	protein_coding	HIP1R	2	OTTHUMG00000168765.2	chr12	HAVANA	gene	122834453	122862961	+	1.15611	6.5482	21.9045	2.55493e-13	3.97073e-12	20.5932
ENSG00000103187.8	protein_coding	COTL1	2	OTTHUMG00000137634.5	chr16	HAVANA	gene	84565596	84618078	-	-0.741182	8.64715	-22.3075	1.92747e-13	3.11433e-12	20.585
ENSG00000135829.17	protein_coding	DHX9	2	OTTHUMG00000035337.6	chr1	HAVANA	gene	182839347	182887982	+	-0.808024	8.61953	-22.3016	1.93533e-13	3.12084e-12	20.585
ENSG00000148843.15	protein_coding	PDCD11	2	OTTHUMG00000018988.5	chr10	HAVANA	gene	103396626	103446294	+	-1.27869	6.59565	-21.9094	2.54608e-13	3.96076e-12	20.581
ENSG00000204267.19	protein_coding	TAP2	2	OTTHUMG00000031068.4	chr6	HAVANA	gene	32821833	32838739	-	-1.1903	5.77312	-21.7328	2.8851e-13	4.39999e-12	20.5696
ENSG00000111142.14	protein_coding	METAP2	1	OTTHUMG00000170280.3	chr12	HAVANA	gene	95473520	95515839	+	-1.25125	6.88582	-21.9401	2.49149e-13	3.88119e-12	20.5617
ENSG00000084090.14	protein_coding	STARD7	1	OTTHUMG00000130457.4	chr2	HAVANA	gene	96184859	96208827	-	-0.918579	6.91892	-21.9395	2.49255e-13	3.88119e-12	20.5521
ENSG00000215021.10	protein_coding	PHB2	1	OTTHUMG00000168519.5	chr12	HAVANA	gene	6965327	6970780	-	-0.74181	8.60986	-22.2391	2.02125e-13	3.23381e-12	20.5401
ENSG00000130529.16	protein_coding	TRPM4	1	OTTHUMG00000183184.7	chr19	HAVANA	gene	49157741	49211836	+	3.56668	3.1641	21.7572	2.83546e-13	4.34869e-12	20.54
ENSG00000110958.16	protein_coding	PTGES3	2	OTTHUMG00000170217.3	chr12	HAVANA	gene	56663341	56688408	-	-1.21393	8.52562	-22.2152	2.05504e-13	3.26544e-12	20.5384
ENSG00000151835.17	protein_coding	SACS	1	OTTHUMG00000016562.6	chr13	HAVANA	gene	23288689	23433763	-	-1.46049	6.09661	-21.7445	2.86107e-13	4.37259e-12	20.537
ENSG00000112414.15	protein_coding	ADGRG6	2	OTTHUMG00000015709.7	chr6	HAVANA	gene	142301854	142446266	+	-1.44622	5.89847	-21.7005	2.95205e-13	4.48113e-12	20.5335
ENSG00000053747.17	protein_coding	LAMA3	1	OTTHUMG00000131874.11	chr18	HAVANA	gene	23689453	23956222	+	1.04735	8.79775	22.254	2.00041e-13	3.20676e-12	20.5335
ENSG00000134030.14	protein_coding	CTIF	2	OTTHUMG00000132656.15	chr18	HAVANA	gene	48539031	48863217	+	1.781	4.41973	21.3932	3.67879e-13	5.45231e-12	20.521
ENSG00000160410.15	protein_coding	SHKBP1	1	OTTHUMG00000182602.11	chr19	HAVANA	gene	40576853	40591399	+	1.0449	6.38223	21.7695	2.81084e-13	4.31905e-12	20.5149
ENSG00000186575.19	protein_coding	NF2	2	OTTHUMG00000030727.5	chr22	HAVANA	gene	29603556	29698598	+	-1.08633	6.28572	-21.7559	2.83814e-13	4.34871e-12	20.5088
ENSG00000111670.16	protein_coding	GNPTAB	2	OTTHUMG00000170444.3	chr12	HAVANA	gene	101745499	101830959	-	1.13743	6.35631	21.7442	2.86177e-13	4.37259e-12	20.5024
ENSG00000134809.9	protein_coding	TIMM10	2	OTTHUMG00000167039.2	chr11	HAVANA	gene	57528464	57530803	-	-1.53255	5.44812	-21.5581	3.26774e-13	4.91457e-12	20.4976
ENSG00000143256.5	protein_coding	PFDN2	2	OTTHUMG00000031481.2	chr1	HAVANA	gene	161100556	161118055	-	-1.30994	5.39774	-21.5514	3.28361e-13	4.93388e-12	20.4937
ENSG00000116761.12	protein_coding	CTH	2	OTTHUMG00000009352.2	chr1	HAVANA	gene	70411218	70439851	+	1.96225	4.54153	21.3527	3.78802e-13	5.59385e-12	20.4857
ENSG00000112742.10	protein_coding	TTK	1	OTTHUMG00000015088.5	chr6	HAVANA	gene	80003887	80042527	+	-1.97092	5.11264	-21.459	3.50875e-13	5.22403e-12	20.4856
ENSG00000183520.12	protein_coding	UTP11	2	OTTHUMG00000004435.2	chr1	HAVANA	gene	38009258	38024820	+	-1.20635	5.61748	-21.5675	3.24593e-13	4.88628e-12	20.4708
ENSG00000140950.16	protein_coding	MEAK7	2	OTTHUMG00000176739.4	chr16	HAVANA	gene	84476355	84554033	-	1.12608	6.17392	21.6609	3.03644e-13	4.60065e-12	20.4675
ENSG00000165119.22	protein_coding	HNRNPK	2	OTTHUMG00000020107.6	chr9	HAVANA	gene	83968083	83980631	-	-0.650545	9.60017	-22.2654	1.98455e-13	3.1876e-12	20.4217
ENSG00000100575.14	protein_coding	TIMM9	1	OTTHUMG00000140322.8	chr14	HAVANA	gene	58408495	58427531	-	-1.47339	5.00972	-21.345	3.80903e-13	5.61978e-12	20.3994
ENSG00000146072.6	protein_coding	TNFRSF21	2	OTTHUMG00000014796.1	chr6	HAVANA	gene	47231532	47309905	-	0.794412	7.86993	21.9005	2.56214e-13	3.97437e-12	20.3974
ENSG00000186298.12	protein_coding	PPP1CC	2	OTTHUMG00000169531.5	chr12	HAVANA	gene	110719680	110742939	-	-1.34175	7.5787	-21.8441	2.6662e-13	4.10842e-12	20.3964
ENSG00000100292.18	protein_coding	HMOX1	2	OTTHUMG00000150960.4	chr22	HAVANA	gene	35380361	35394214	+	2.31198	3.93224	21.168	4.33111e-13	6.28204e-12	20.3794
ENSG00000273760.1	lncRNA	ENSG00000273760	2	OTTHUMG00000189092.1	chr10	HAVANA	gene	47970043	47973496	-	1.1521	5.97925	21.5014	3.40338e-13	5.09507e-12	20.3786
ENSG00000105968.19	protein_coding	H2AZ2	2	OTTHUMG00000129217.4	chr7	HAVANA	gene	44826791	44848087	-	-1.00195	7.32576	-21.761	2.82785e-13	4.3411e-12	20.3651
ENSG00000143933.20	protein_coding	CALM2	2	OTTHUMG00000128850.11	chr2	HAVANA	gene	47160084	47176921	-	-0.94674	8.8553	-22.0396	2.3234e-13	3.64917e-12	20.3612
ENSG00000007968.7	protein_coding	E2F2	2	OTTHUMG00000003223.2	chr1	HAVANA	gene	23506438	23531233	-	-2.89829	3.0552	-21.2909	3.96126e-13	5.81113e-12	20.344
ENSG00000153107.13	protein_coding	ANAPC1	2	OTTHUMG00000192458.2	chr2	HAVANA	gene	111611639	111884690	-	-1.27547	5.72023	-21.4078	3.64029e-13	5.40507e-12	20.3382
ENSG00000109606.13	protein_coding	DHX15	2	OTTHUMG00000160304.2	chr4	HAVANA	gene	24517441	24584554	-	-0.853739	8.05637	-21.8593	2.63769e-13	4.07604e-12	20.3368
ENSG00000108679.13	protein_coding	LGALS3BP	1	OTTHUMG00000177572.8	chr17	HAVANA	gene	78971238	78979947	-	0.681038	8.91242	22.0052	2.38013e-13	3.7298e-12	20.3299
ENSG00000177239.16	protein_coding	MAN1B1	1	OTTHUMG00000020978.7	chr9	HAVANA	gene	137086857	137109189	+	1.19683	6.12277	21.462	3.50097e-13	5.21721e-12	20.3292
ENSG00000117984.15	protein_coding	CTSD	1	OTTHUMG00000044760.24	chr11	HAVANA	gene	1752752	1764573	-	0.93277	6.97331	21.6385	3.08544e-13	4.66736e-12	20.3289
ENSG00000145715.15	protein_coding	RASA1	2	OTTHUMG00000162605.3	chr5	HAVANA	gene	87267883	87391931	+	-0.875519	7.5957	-21.7536	2.84267e-13	4.35156e-12	20.3216
ENSG00000163002.13	protein_coding	NUP35	1	OTTHUMG00000132621.8	chr2	HAVANA	gene	183117513	183161680	+	-1.91419	4.12624	-21.0903	4.58353e-13	6.58953e-12	20.3123
ENSG00000168938.6	protein_coding	PPIC	2	OTTHUMG00000128921.3	chr5	HAVANA	gene	123023250	123036725	-	1.33095	5.44662	21.2963	3.94573e-13	5.79525e-12	20.3111
ENSG00000111145.8	protein_coding	ELK3	2	OTTHUMG00000170364.4	chr12	HAVANA	gene	96194375	96269824	+	-1.2335	6.1113	-21.4471	3.53872e-13	5.26385e-12	20.3077
ENSG00000110880.11	protein_coding	CORO1C	2	OTTHUMG00000169381.3	chr12	HAVANA	gene	108645109	108731526	-	-0.719264	8.79489	-21.9552	2.46517e-13	3.84591e-12	20.3055
ENSG00000100522.10	protein_coding	GNPNAT1	1	OTTHUMG00000152334.6	chr14	HAVANA	gene	52775193	52791668	-	-1.27051	7.51729	-21.7033	2.94613e-13	4.47631e-12	20.2991
ENSG00000167861.16	protein_coding	HID1	1	OTTHUMG00000166490.7	chr17	HAVANA	gene	74950742	74973166	-	2.01696	3.97983	21.0364	4.76804e-13	6.81363e-12	20.2843
ENSG00000108559.13	protein_coding	NUP88	1	OTTHUMG00000099453.5	chr17	HAVANA	gene	5359668	5420164	-	-1.13592	5.88343	-21.3655	3.75308e-13	5.5523e-12	20.2784
ENSG00000130702.15	protein_coding	LAMA5	2	OTTHUMG00000032908.6	chr20	HAVANA	gene	62307955	62367312	-	1.33793	6.60814	21.4741	3.47084e-13	5.18179e-12	20.2697
ENSG00000133030.22	protein_coding	MPRIP	1	OTTHUMG00000059276.11	chr17	HAVANA	gene	17042457	17217679	+	-0.741843	8.62409	-21.8494	2.65622e-13	4.09691e-12	20.2506
ENSG00000171223.6	protein_coding	JUNB	2	OTTHUMG00000180373.2	chr19	HAVANA	gene	12791486	12793315	+	1.30857	5.89681	21.3004	3.93407e-13	5.78334e-12	20.2461
ENSG00000196406.4	protein_coding	SPANXD	2	OTTHUMG00000022563.2	chrX	HAVANA	gene	141697411	141698739	-	2.73308	3.42349	21.0496	4.72192e-13	6.77058e-12	20.2348
ENSG00000146733.14	protein_coding	PSPH	2	OTTHUMG00000023441.11	chr7	HAVANA	gene	56011051	56051604	-	-1.57056	4.97557	-21.1128	4.50881e-13	6.50852e-12	20.2329
ENSG00000162390.18	protein_coding	ACOT11	2	OTTHUMG00000009891.2	chr1	HAVANA	gene	54542257	54639192	+	2.29103	3.82623	20.9561	5.05727e-13	7.13841e-12	20.2236
ENSG00000198513.14	protein_coding	ATL1	2	OTTHUMG00000140297.8	chr14	HAVANA	gene	50532509	50634017	+	2.74464	3.37333	21.035	4.77284e-13	6.81363e-12	20.2135
ENSG00000064601.21	protein_coding	CTSA	2	OTTHUMG00000033078.16	chr20	HAVANA	gene	45890144	45898949	+	0.735082	8.12871	21.6902	2.97382e-13	4.50997e-12	20.2044
ENSG00000124275.15	protein_coding	MTRR	1	OTTHUMG00000090477.4	chr5	HAVANA	gene	7851186	7906025	+	-1.17834	5.63225	-21.2138	4.18893e-13	6.11416e-12	20.2032
ENSG00000074590.14	protein_coding	NUAK1	1	OTTHUMG00000169763.4	chr12	HAVANA	gene	106063345	106138954	-	1.24643	6.17681	21.29	3.96367e-13	5.81113e-12	20.1933
ENSG00000171453.20	protein_coding	POLR1C	2	OTTHUMG00000014739.13	chr6	HAVANA	gene	43509702	43562419	+	-1.45694	5.01929	-21.0702	4.65156e-13	6.68144e-12	20.192
ENSG00000182963.11	protein_coding	GJC1	1	OTTHUMG00000179861.5	chr17	HAVANA	gene	44798448	44830816	-	-3.62831	2.63161	-21.4985	3.41048e-13	5.10102e-12	20.192
ENSG00000166938.13	protein_coding	DIS3L	1	OTTHUMG00000133181.10	chr15	HAVANA	gene	66293217	66333898	+	-1.47216	5.27402	-21.1042	4.53719e-13	6.52867e-12	20.1817
ENSG00000080815.20	protein_coding	PSEN1	1	OTTHUMG00000141279.18	chr14	HAVANA	gene	73136418	73223691	+	0.849074	7.23807	21.4874	3.43787e-13	5.13727e-12	20.1767
ENSG00000130821.17	protein_coding	SLC6A8	2	OTTHUMG00000024208.4	chrX	HAVANA	gene	153687926	153696588	+	-0.907535	6.75225	-21.4035	3.65165e-13	5.417e-12	20.1755
ENSG00000180817.12	protein_coding	PPA1	2	OTTHUMG00000018399.3	chr10	HAVANA	gene	70202835	70233911	-	-1.00668	7.51175	-21.5393	3.31211e-13	4.96924e-12	20.1738
ENSG00000118655.8	protein_coding	DCLRE1B	2	OTTHUMG00000011937.5	chr1	HAVANA	gene	113904619	113914086	+	-1.74348	4.26687	-20.9212	5.18868e-13	7.29334e-12	20.1737
ENSG00000184557.4	protein_coding	SOCS3	2	OTTHUMG00000177513.5	chr17	HAVANA	gene	78356778	78360077	-	-1.6935	4.88935	-21.0114	4.85612e-13	6.89028e-12	20.1716
ENSG00000120549.19	protein_coding	KIAA1217	1	OTTHUMG00000017824.8	chr10	HAVANA	gene	23694746	24547848	+	1.7041	5.18808	21.0352	4.77204e-13	6.81363e-12	20.1664
ENSG00000102172.16	protein_coding	SMS	2	OTTHUMG00000021239.4	chrX	HAVANA	gene	21940709	21994837	+	-0.991505	7.58795	-21.5388	3.31323e-13	4.96924e-12	20.1629
ENSG00000163950.13	protein_coding	SLBP	1	OTTHUMG00000089349.7	chr4	HAVANA	gene	1692731	1712344	-	-1.41586	5.67606	-21.1595	4.358e-13	6.30982e-12	20.1616
ENSG00000160124.9	protein_coding	MIX23	2	OTTHUMG00000159490.1	chr3	HAVANA	gene	122359591	122383231	-	-1.42819	4.87962	-21.003	4.88624e-13	6.92699e-12	20.1595
ENSG00000116750.14	protein_coding	UCHL5	2	OTTHUMG00000035561.5	chr1	HAVANA	gene	193012250	193060080	-	-1.57874	5.48676	-21.1121	4.51121e-13	6.50852e-12	20.1592
ENSG00000247626.5	protein_coding	MARS2	2	OTTHUMG00000154487.3	chr2	HAVANA	gene	197705369	197708395	+	-1.93568	4.00529	-20.87	5.38851e-13	7.55364e-12	20.156
ENSG00000178718.7	protein_coding	RPP25	2	OTTHUMG00000142822.2	chr15	HAVANA	gene	74954418	74956772	-	-1.45561	5.11906	-21.0357	4.7705e-13	6.81363e-12	20.1518
ENSG00000092201.10	protein_coding	SUPT16H	2	OTTHUMG00000029685.4	chr14	HAVANA	gene	21351476	21384019	-	-1.0455	7.2935	-21.4661	3.49071e-13	5.20668e-12	20.1491
ENSG00000112079.9	protein_coding	STK38	2	OTTHUMG00000014598.2	chr6	HAVANA	gene	36493892	36547479	-	1.13844	6.65796	21.3211	3.87549e-13	5.70236e-12	20.1411
ENSG00000106355.10	protein_coding	LSM5	2	OTTHUMG00000022913.5	chr7	HAVANA	gene	32485338	32495283	-	-1.69739	5.14753	-21.0137	4.84797e-13	6.88471e-12	20.1385
ENSG00000154760.14	protein_coding	SLFN13	2	OTTHUMG00000165108.4	chr17	HAVANA	gene	35435096	35448837	-	-1.2554	5.65527	-21.1281	4.45891e-13	6.45018e-12	20.1366
ENSG00000155438.12	protein_coding	NIFK	2	OTTHUMG00000131442.5	chr2	HAVANA	gene	121726945	121736911	-	-1.33635	5.90979	-21.1642	4.34286e-13	6.29348e-12	20.1273
ENSG00000100350.16	protein_coding	FOXRED2	2	OTTHUMG00000044614.6	chr22	HAVANA	gene	36487190	36507221	-	-1.27453	5.31659	-21.0371	4.7655e-13	6.81363e-12	20.1194
ENSG00000128510.12	protein_coding	CPA4	1	OTTHUMG00000157825.5	chr7	HAVANA	gene	130293134	130324180	+	3.9525	3.15568	21.2312	4.13638e-13	6.04802e-12	20.1126
ENSG00000166226.13	protein_coding	CCT2	2	OTTHUMG00000169383.2	chr12	HAVANA	gene	69585426	69601570	+	-0.784702	8.38889	-21.5934	3.18626e-13	4.80977e-12	20.0918
ENSG00000100906.12	protein_coding	NFKBIA	1	OTTHUMG00000140220.4	chr14	HAVANA	gene	35401079	35404749	-	1.21246	6.45195	21.2071	4.20954e-13	6.13847e-12	20.0878
ENSG00000129667.13	protein_coding	RHBDF2	1	OTTHUMG00000180180.3	chr17	HAVANA	gene	76470891	76501790	-	1.1058	5.96869	21.108	4.52481e-13	6.51821e-12	20.0826
ENSG00000178104.22	protein_coding	PDE4DIP	1	OTTHUMG00000013846.16	chr1	HAVANA	gene	148808140	149048286	+	-1.00504	6.30919	-21.1919	4.25622e-13	6.18994e-12	20.0809
ENSG00000291110.1	lncRNA	TRIM16L	2	NA	chr17	HAVANA	gene	18697998	18736118	+	1.77841	4.39263	20.7694	5.80458e-13	8.06066e-12	20.061
ENSG00000173846.13	protein_coding	PLK3	2	OTTHUMG00000008491.3	chr1	HAVANA	gene	44800377	44805990	+	-2.24686	3.60466	-20.727	5.98991e-13	8.29681e-12	20.0545
ENSG00000166788.10	protein_coding	SAAL1	1	OTTHUMG00000166428.3	chr11	HAVANA	gene	18069935	18106087	-	-1.32438	5.18844	-20.921	5.1894e-13	7.29334e-12	20.0513
ENSG00000138764.15	protein_coding	CCNG2	2	OTTHUMG00000130100.5	chr4	HAVANA	gene	77157207	77433388	+	2.04646	4.23852	20.7294	5.97947e-13	8.28939e-12	20.0477
ENSG00000139178.12	protein_coding	C1RL	1	OTTHUMG00000168144.4	chr12	HAVANA	gene	7089587	7109238	-	2.21285	4.25786	20.7252	5.99827e-13	8.30134e-12	20.0471
ENSG00000104964.15	protein_coding	TLE5	2	OTTHUMG00000180567.4	chr19	HAVANA	gene	3052910	3063107	-	0.91813	7.63264	21.3855	3.69935e-13	5.47779e-12	20.0461
ENSG00000184992.13	protein_coding	BRI3BP	2	OTTHUMG00000168548.4	chr12	HAVANA	gene	124993645	125031231	+	-1.2342	6.15763	-21.1076	4.52592e-13	6.51821e-12	20.0442
ENSG00000083444.17	protein_coding	PLOD1	2	OTTHUMG00000002393.5	chr1	HAVANA	gene	11934205	11975538	+	0.847585	7.40675	21.343	3.81467e-13	5.62302e-12	20.0441
ENSG00000101773.19	protein_coding	RBBP8	1	OTTHUMG00000131769.7	chr18	HAVANA	gene	22798261	23026488	+	-1.34615	5.35297	-20.9305	5.15359e-13	7.2618e-12	20.0347
ENSG00000180891.13	protein_coding	CUEDC1	1	OTTHUMG00000178775.4	chr17	HAVANA	gene	57861243	57955412	-	1.21714	5.68389	20.9762	4.98323e-13	7.05835e-12	20.0296
ENSG00000153922.12	protein_coding	CHD1	2	OTTHUMG00000162744.3	chr5	HAVANA	gene	98853985	98929007	-	-1.10823	6.72417	-21.1852	4.27722e-13	6.21494e-12	20.0169
ENSG00000165891.16	protein_coding	E2F7	2	OTTHUMG00000169969.3	chr12	HAVANA	gene	77021248	77065569	-	-1.36522	5.96365	-21.0279	4.79772e-13	6.84316e-12	20.0163
ENSG00000046604.14	protein_coding	DSG2	2	OTTHUMG00000179649.3	chr18	HAVANA	gene	31498177	31549008	+	0.78679	8.11685	21.425	3.59545e-13	5.34336e-12	20.0071
ENSG00000163638.13	protein_coding	ADAMTS9	2	OTTHUMG00000158722.2	chr3	HAVANA	gene	64515654	64688000	-	2.11792	3.91745	20.6499	6.34369e-13	8.70549e-12	20.0003
ENSG00000109674.4	protein_coding	NEIL3	2	OTTHUMG00000160722.2	chr4	HAVANA	gene	177309874	177362936	+	-2.58392	3.42937	-20.6777	6.21394e-13	8.56319e-12	19.9994
ENSG00000166145.15	protein_coding	SPINT1	1	OTTHUMG00000130068.4	chr15	HAVANA	gene	40844018	40858207	+	0.84797	7.37105	21.2733	4.01213e-13	5.87689e-12	19.9962
ENSG00000139725.8	protein_coding	RHOF	2	OTTHUMG00000169077.6	chr12	HAVANA	gene	121777754	121803403	-	-1.24754	5.36827	-20.8521	5.46014e-13	7.64748e-12	19.9699
ENSG00000118898.16	protein_coding	PPL	2	OTTHUMG00000129528.9	chr16	HAVANA	gene	4882507	4960741	-	1.25339	6.37674	21.0263	4.80314e-13	6.8449e-12	19.963
ENSG00000168528.12	protein_coding	SERINC2	2	OTTHUMG00000003796.3	chr1	HAVANA	gene	31409565	31434680	+	1.35498	5.46907	20.8361	5.52486e-13	7.72486e-12	19.9605
ENSG00000185022.12	protein_coding	MAFF	2	OTTHUMG00000151163.5	chr22	HAVANA	gene	38200767	38216507	+	-2.00624	4.00286	-20.594	6.61414e-13	9.01592e-12	19.9509
ENSG00000126005.17	protein_coding	MMP24OS	1	OTTHUMG00000032333.10	chr20	HAVANA	gene	35201745	35278131	-	1.16418	6.19302	20.9595	5.0448e-13	7.12698e-12	19.937
ENSG00000167468.20	protein_coding	GPX4	1	OTTHUMG00000181874.11	chr19	HAVANA	gene	1103982	1106791	+	1.04572	7.26497	21.1701	4.3242e-13	6.27761e-12	19.936
ENSG00000152455.16	protein_coding	SUV39H2	1	OTTHUMG00000017718.5	chr10	HAVANA	gene	14878820	14904315	+	-2.22976	3.76037	-20.5377	6.89822e-13	9.32518e-12	19.917
ENSG00000074201.9	protein_coding	CLNS1A	2	OTTHUMG00000165143.5	chr11	HAVANA	gene	77514936	77637794	-	-0.924134	6.72693	-21.0531	4.71008e-13	6.75954e-12	19.9129
ENSG00000144824.21	protein_coding	PHLDB2	1	OTTHUMG00000159282.4	chr3	HAVANA	gene	111732497	111976517	+	0.883579	7.85626	21.2505	4.07882e-13	5.96921e-12	19.912
ENSG00000114850.7	protein_coding	SSR3	1	OTTHUMG00000158632.1	chr3	HAVANA	gene	156539553	156555149	-	-0.867552	8.505	-21.3528	3.78762e-13	5.59385e-12	19.8944
ENSG00000109519.14	protein_coding	GRPEL1	2	OTTHUMG00000090495.3	chr4	HAVANA	gene	7058671	7068085	-	-1.29836	5.56844	-20.7899	5.71728e-13	7.95297e-12	19.8931
ENSG00000184162.15	protein_coding	NR2C2AP	2	OTTHUMG00000169225.6	chr19	HAVANA	gene	19201409	19203414	-	-1.68056	4.39238	-20.5506	6.8321e-13	9.25883e-12	19.8806
ENSG00000149929.16	protein_coding	HIRIP3	1	OTTHUMG00000132118.5	chr16	HAVANA	gene	29992330	29996074	-	-1.98556	3.97738	-20.4968	7.1134e-13	9.5922e-12	19.8788
ENSG00000164284.15	protein_coding	GRPEL2	1	OTTHUMG00000130048.3	chr5	HAVANA	gene	149345430	149354583	+	-1.42533	4.74324	-20.6021	6.57419e-13	8.99031e-12	19.8723
ENSG00000185101.13	protein_coding	ANO9	2	OTTHUMG00000165446.3	chr11	HAVANA	gene	417933	442011	-	2.23841	5.42892	20.6563	6.31338e-13	8.67119e-12	19.8675
ENSG00000142949.17	protein_coding	PTPRF	2	OTTHUMG00000007501.6	chr1	HAVANA	gene	43525187	43623666	+	0.752904	8.64984	21.3356	3.83512e-13	5.64805e-12	19.8648
ENSG00000117602.13	protein_coding	RCAN3	2	OTTHUMG00000003298.9	chr1	HAVANA	gene	24502351	24541040	+	1.29776	5.16015	20.6464	6.36033e-13	8.72098e-12	19.8586
ENSG00000213853.10	protein_coding	EMP2	1	OTTHUMG00000129752.4	chr16	HAVANA	gene	10528422	10580632	-	-2.28755	3.44915	-20.4688	7.2643e-13	9.74731e-12	19.8559
ENSG00000103194.16	protein_coding	USP10	2	OTTHUMG00000176770.5	chr16	HAVANA	gene	84699986	84779922	+	-0.970559	6.72716	-20.9609	5.03942e-13	7.12555e-12	19.8428
ENSG00000164466.13	protein_coding	SFXN1	2	OTTHUMG00000130555.6	chr5	HAVANA	gene	175477062	175529742	+	-1.02233	6.66174	-20.9447	5.10003e-13	7.19254e-12	19.8404
ENSG00000149577.17	protein_coding	SIDT2	1	OTTHUMG00000167065.4	chr11	HAVANA	gene	117178736	117197445	+	1.36955	5.06889	20.6011	6.57881e-13	8.99031e-12	19.8395
ENSG00000104812.15	protein_coding	GYS1	1	OTTHUMG00000150723.5	chr19	HAVANA	gene	48968130	48993310	-	1.15015	6.70952	20.9274	5.1651e-13	7.27173e-12	19.8334
ENSG00000088298.13	protein_coding	EDEM2	2	OTTHUMG00000032322.5	chr20	HAVANA	gene	35115364	35147336	-	1.42429	5.09846	20.5949	6.60946e-13	9.01592e-12	19.8327
ENSG00000173918.15	protein_coding	C1QTNF1	1	OTTHUMG00000177533.7	chr17	HAVANA	gene	79022814	79049788	+	3.75719	3.15522	20.7196	6.02319e-13	8.32876e-12	19.8166
ENSG00000117139.18	protein_coding	KDM5B	1	OTTHUMG00000041401.12	chr1	HAVANA	gene	202724495	202808487	-	1.05904	6.33092	20.831	5.54592e-13	7.74102e-12	19.8136
ENSG00000135596.18	protein_coding	MICAL1	1	OTTHUMG00000015350.9	chr6	HAVANA	gene	109444062	109465968	-	3.41611	3.80051	20.4441	7.40084e-13	9.90607e-12	19.8131
ENSG00000125844.17	protein_coding	RRBP1	2	OTTHUMG00000031945.13	chr20	HAVANA	gene	17613678	17682295	-	0.845581	8.34291	21.1957	4.2446e-13	6.17855e-12	19.8018
ENSG00000189410.12	protein_coding	SH2D5	2	OTTHUMG00000002620.4	chr1	HAVANA	gene	20719731	20732837	-	-2.46619	3.43858	-20.4001	7.6497e-13	1.01973e-11	19.8002
ENSG00000196419.13	protein_coding	XRCC6	2	OTTHUMG00000151190.3	chr22	HAVANA	gene	41621163	41664048	+	-0.717278	8.42482	-21.2138	4.18912e-13	6.11416e-12	19.7984
ENSG00000144231.11	protein_coding	POLR2D	1	OTTHUMG00000131531.6	chr2	HAVANA	gene	127843553	127858155	-	-1.17535	5.7851	-20.7028	6.09895e-13	8.41211e-12	19.7892
ENSG00000103342.13	protein_coding	GSPT1	2	OTTHUMG00000172956.3	chr16	HAVANA	gene	11868128	11916082	-	-0.90731	7.45003	-21.0212	4.82143e-13	6.85299e-12	19.7873
ENSG00000163235.16	protein_coding	TGFA	2	OTTHUMG00000129669.40	chr2	HAVANA	gene	70447284	70554193	-	-0.857438	7.20794	-20.9748	4.98815e-13	7.05918e-12	19.7847
ENSG00000111364.16	protein_coding	DDX55	2	OTTHUMG00000168695.3	chr12	HAVANA	gene	123602077	123620943	+	-1.35737	5.18954	-20.568	6.7436e-13	9.16938e-12	19.7813
ENSG00000138760.11	protein_coding	SCARB2	1	OTTHUMG00000130099.7	chr4	HAVANA	gene	76158737	76234536	-	0.945868	7.59711	21.022	4.81852e-13	6.85299e-12	19.7739
ENSG00000105048.18	protein_coding	TNNT1	2	OTTHUMG00000180542.8	chr19	HAVANA	gene	55132698	55149206	-	1.85645	4.85299	20.4496	7.37006e-13	9.87298e-12	19.7699
ENSG00000205250.9	protein_coding	E2F4	2	OTTHUMG00000172975.3	chr16	HAVANA	gene	67192155	67198918	+	-0.992458	6.54946	-20.8267	5.56355e-13	7.75899e-12	19.7653
ENSG00000142327.13	protein_coding	RNPEPL1	1	OTTHUMG00000133357.8	chr2	HAVANA	gene	240565804	240581372	+	1.07455	6.06649	20.7139	6.04885e-13	8.35225e-12	19.7643
ENSG00000149809.17	protein_coding	TM7SF2	2	OTTHUMG00000165603.4	chr11	HAVANA	gene	65111845	65116384	+	2.51321	3.90033	20.3291	8.07099e-13	1.06977e-11	19.7601
ENSG00000197299.13	protein_coding	BLM	1	OTTHUMG00000149834.7	chr15	HAVANA	gene	90717346	90816166	+	-2.07732	3.82569	-20.3129	8.1709e-13	1.07719e-11	19.7464
ENSG00000112578.10	protein_coding	BYSL	2	OTTHUMG00000014687.3	chr6	HAVANA	gene	41921499	41933046	+	-1.43866	5.06708	-20.4946	7.12488e-13	9.59974e-12	19.7449
ENSG00000129680.16	protein_coding	MAP7D3	1	OTTHUMG00000022507.5	chrX	HAVANA	gene	136213220	136256482	-	-1.09342	6.79096	-20.8322	5.54074e-13	7.74042e-12	19.7361
ENSG00000154640.15	protein_coding	BTG3	2	OTTHUMG00000074501.4	chr21	HAVANA	gene	17593653	17612945	-	-1.28356	5.09717	-20.4866	7.16818e-13	9.64215e-12	19.7301
ENSG00000103811.18	protein_coding	CTSH	2	OTTHUMG00000144171.5	chr15	HAVANA	gene	78921058	78949574	-	1.15197	6.05724	20.6641	6.27695e-13	8.62932e-12	19.7295
ENSG00000161638.11	protein_coding	ITGA5	2	OTTHUMG00000169841.3	chr12	HAVANA	gene	54395261	54419266	-	1.23378	5.53317	20.5537	6.81623e-13	9.245e-12	19.7283
ENSG00000102226.10	protein_coding	USP11	1	OTTHUMG00000021437.6	chrX	HAVANA	gene	47232866	47248328	+	0.91915	7.17905	20.8848	5.32996e-13	7.478e-12	19.7265
ENSG00000113645.15	protein_coding	WWC1	1	OTTHUMG00000130408.4	chr5	HAVANA	gene	168291645	168472303	+	0.762648	7.93113	21.0215	4.8202e-13	6.85299e-12	19.7244
ENSG00000092929.13	protein_coding	UNC13D	2	OTTHUMG00000179895.3	chr17	HAVANA	gene	75827225	75844785	-	0.912003	8.50508	21.1224	4.47732e-13	6.47108e-12	19.7241
ENSG00000169583.13	protein_coding	CLIC3	2	OTTHUMG00000020954.4	chr9	HAVANA	gene	136994608	136996568	-	6.13987	2.84643	22.4393	1.75959e-13	2.87729e-12	19.7238
ENSG00000001497.18	protein_coding	LAS1L	2	OTTHUMG00000021720.2	chrX	HAVANA	gene	65438549	65534810	-	-1.12163	6.11572	-20.664	6.2776e-13	8.62932e-12	19.7068
ENSG00000025770.19	protein_coding	NCAPH2	2	OTTHUMG00000150205.7	chr22	HAVANA	gene	50508224	50524780	+	-1.3177	5.26078	-20.485	7.17653e-13	9.64543e-12	19.7051
ENSG00000112149.10	protein_coding	CD83	2	OTTHUMG00000014283.2	chr6	HAVANA	gene	14117256	14136918	+	-1.89522	4.11627	-20.2706	8.43689e-13	1.10835e-11	19.6962
ENSG00000133226.19	protein_coding	SRRM1	2	OTTHUMG00000003320.5	chr1	HAVANA	gene	24631716	24673281	+	-0.90597	6.97824	-20.816	5.60774e-13	7.80725e-12	19.6944
ENSG00000213160.10	protein_coding	KLHL23	2	OTTHUMG00000132213.9	chr2	HAVANA	gene	169694488	169776989	+	-1.70106	4.48491	-20.3198	8.12829e-13	1.07466e-11	19.6939
ENSG00000177311.12	protein_coding	ZBTB38	1	OTTHUMG00000160128.4	chr3	HAVANA	gene	141324213	141449792	+	0.838903	9.17168	21.1984	4.23611e-13	6.17169e-12	19.6879
ENSG00000090447.12	protein_coding	TFAP4	1	OTTHUMG00000129435.4	chr16	HAVANA	gene	4257186	4273075	-	-2.90794	3.09317	-20.3389	8.01145e-13	1.0636e-11	19.6854
ENSG00000197496.6	protein_coding	SLC2A10	2	OTTHUMG00000032657.5	chr20	HAVANA	gene	46709649	46736347	+	1.9023	4.73343	20.3169	8.14608e-13	1.07535e-11	19.684
ENSG00000187608.10	protein_coding	ISG15	2	OTTHUMG00000040777.4	chr1	HAVANA	gene	1001138	1014540	+	1.30446	5.16411	20.4068	7.61145e-13	1.01546e-11	19.6728
ENSG00000173230.17	protein_coding	GOLGB1	2	OTTHUMG00000159411.2	chr3	HAVANA	gene	121663199	121749966	-	0.942434	7.291	20.8167	5.60481e-13	7.80725e-12	19.6582
ENSG00000258947.8	protein_coding	TUBB3	1	OTTHUMG00000138985.4	chr16	HAVANA	gene	89921392	89938761	+	3.77012	2.76236	20.7785	5.76563e-13	8.01339e-12	19.6543
ENSG00000134333.15	protein_coding	LDHA	1	OTTHUMG00000167721.4	chr11	HAVANA	gene	18394560	18408425	+	0.514508	10.98	21.5079	3.38753e-13	5.076e-12	19.6511
ENSG00000086189.11	protein_coding	DIMT1	2	OTTHUMG00000131223.5	chr5	HAVANA	gene	62347284	62403943	-	-1.58934	5.47076	-20.4421	7.41147e-13	9.91215e-12	19.6473
ENSG00000123374.11	protein_coding	CDK2	1	OTTHUMG00000170575.2	chr12	HAVANA	gene	55966781	55972789	+	-1.14003	5.90708	-20.5391	6.89148e-13	9.32381e-12	19.6422
ENSG00000068654.17	protein_coding	POLR1A	1	OTTHUMG00000153165.4	chr2	HAVANA	gene	86020216	86106155	-	-0.928055	6.79756	-20.7135	6.05042e-13	8.35225e-12	19.6406
ENSG00000124098.10	protein_coding	FAM210B	2	OTTHUMG00000032793.3	chr20	HAVANA	gene	56358974	56368663	+	1.32081	5.43686	20.4157	7.56028e-13	1.00946e-11	19.6391
ENSG00000075399.14	protein_coding	VPS9D1	2	OTTHUMG00000173219.3	chr16	HAVANA	gene	89707134	89720898	-	2.71535	3.448	20.2169	8.78761e-13	1.14612e-11	19.6384
ENSG00000104369.5	protein_coding	JPH1	2	OTTHUMG00000164524.2	chr8	HAVANA	gene	74234700	74321540	-	-1.95095	4.21441	-20.2043	8.87265e-13	1.15352e-11	19.6383
ENSG00000131351.15	protein_coding	HAUS8	2	OTTHUMG00000182672.2	chr19	HAVANA	gene	17049729	17075625	-	-2.07573	3.78212	-20.1459	9.27588e-13	1.19911e-11	19.6205
ENSG00000142528.16	protein_coding	ZNF473	1	OTTHUMG00000183054.4	chr19	HAVANA	gene	50025714	50053414	+	-1.73534	4.49547	-20.2235	8.74403e-13	1.14226e-11	19.6187
ENSG00000180573.10	protein_coding	H2AC6	2	OTTHUMG00000014428.2	chr6	HAVANA	gene	26124145	26139116	+	2.6603	4.86604	20.2067	8.85627e-13	1.15287e-11	19.6141
ENSG00000104980.8	protein_coding	TIMM44	2	OTTHUMG00000182478.5	chr19	HAVANA	gene	7926718	7943667	-	-1.0605	5.76267	-20.4535	7.34828e-13	9.85189e-12	19.5962
ENSG00000112208.11	protein_coding	BAG2	2	OTTHUMG00000014919.3	chr6	HAVANA	gene	57172326	57189833	+	-1.4218	4.79456	-20.248	8.58244e-13	1.12385e-11	19.5912
ENSG00000163293.12	protein_coding	NIPAL1	2	OTTHUMG00000128622.11	chr4	HAVANA	gene	47914142	48040173	+	-1.48792	4.68834	-20.2246	8.73634e-13	1.14217e-11	19.5891
ENSG00000100612.14	protein_coding	DHRS7	1	OTTHUMG00000140331.7	chr14	HAVANA	gene	60144119	60169856	-	1.11977	6.40981	20.5467	6.85191e-13	9.27797e-12	19.5822
ENSG00000145833.16	protein_coding	DDX46	2	OTTHUMG00000163072.2	chr5	HAVANA	gene	134758771	134855133	+	-0.869737	7.00802	-20.6766	6.21899e-13	8.56319e-12	19.5814
ENSG00000162385.11	protein_coding	MAGOH	2	OTTHUMG00000008932.2	chr1	HAVANA	gene	53226900	53238518	-	-1.42543	4.73207	-20.206	8.86063e-13	1.15287e-11	19.5672
ENSG00000149636.16	protein_coding	DSN1	2	OTTHUMG00000032396.5	chr20	HAVANA	gene	36751791	36773818	-	-1.52602	4.51185	-20.1311	9.38132e-13	1.21e-11	19.5394
ENSG00000106785.15	protein_coding	TRIM14	2	OTTHUMG00000020339.5	chr9	HAVANA	gene	98069275	98119222	-	-1.08787	5.71696	-20.3629	7.8677e-13	1.04537e-11	19.5328
ENSG00000108384.16	protein_coding	RAD51C	1	OTTHUMG00000141292.8	chr17	HAVANA	gene	58692573	58735611	+	-1.49302	4.80918	-20.145	9.2822e-13	1.19911e-11	19.5108
ENSG00000132589.16	protein_coding	FLOT2	2	OTTHUMG00000132674.7	chr17	HAVANA	gene	28879335	28897733	-	0.932818	6.82811	20.5338	6.9184e-13	9.34471e-12	19.5044
ENSG00000173442.13	protein_coding	EHBP1L1	2	OTTHUMG00000166520.5	chr11	HAVANA	gene	65576046	65592650	+	1.17694	6.16676	20.3869	7.7262e-13	1.02909e-11	19.4968
ENSG00000183723.13	protein_coding	CMTM4	2	OTTHUMG00000137500.4	chr16	HAVANA	gene	66614750	66696743	-	-0.942327	6.98657	-20.5593	6.78805e-13	9.21445e-12	19.4934
ENSG00000125817.8	protein_coding	CENPB	2	OTTHUMG00000031761.3	chr20	HAVANA	gene	3783851	3786740	-	-0.86321	7.0204	-20.5649	6.75938e-13	9.18318e-12	19.4923
ENSG00000184363.10	protein_coding	PKP3	2	OTTHUMG00000119068.8	chr11	HAVANA	gene	392614	404908	+	0.825222	7.27449	20.596	6.60391e-13	9.01592e-12	19.4865
ENSG00000102871.16	protein_coding	TRADD	2	OTTHUMG00000137519.4	chr16	HAVANA	gene	67154185	67159909	-	1.72534	4.77047	20.0611	9.89705e-13	1.27049e-11	19.4728
ENSG00000222041.13	lncRNA	CYTOR	1	OTTHUMG00000130273.15	chr2	HAVANA	gene	87454781	87636740	+	-2.4826	3.30349	-19.9685	1.06253e-12	1.35015e-11	19.4666
ENSG00000033050.9	protein_coding	ABCF2	2	OTTHUMG00000192398.2	chr7	HAVANA	gene	151211484	151227205	-	-1.19966	5.20716	-20.1691	9.11322e-13	1.18102e-11	19.4629
ENSG00000245532.11	lncRNA	NEAT1	1	OTTHUMG00000166321.8	chr11	HAVANA	gene	65422774	65445540	+	2.05113	9.36877	20.9048	5.25205e-13	7.37504e-12	19.4548
ENSG00000163072.16	protein_coding	NOSTRIN	1	OTTHUMG00000153990.20	chr2	HAVANA	gene	168786539	168865514	+	2.92635	3.026	20.0987	9.61651e-13	1.23935e-11	19.453
ENSG00000100567.13	protein_coding	PSMA3	2	OTTHUMG00000140319.8	chr14	HAVANA	gene	58244843	58272012	+	-0.909006	7.46295	-20.5782	6.69264e-13	9.10769e-12	19.4412
ENSG00000075643.6	protein_coding	MOCOS	2	OTTHUMG00000132590.3	chr18	HAVANA	gene	36187497	36272157	+	-1.24614	5.20603	-20.1392	9.32377e-13	1.20353e-11	19.4407
ENSG00000122483.18	protein_coding	CCDC18	1	OTTHUMG00000010598.6	chr1	HAVANA	gene	93179919	93278730	+	-1.79688	4.10311	-19.9351	1.09018e-12	1.37884e-11	19.4355
ENSG00000137492.9	protein_coding	THAP12	2	OTTHUMG00000165280.2	chr11	HAVANA	gene	76349898	76381132	-	-1.035	6.1656	-20.3276	8.0801e-13	1.0701e-11	19.434
ENSG00000174938.15	protein_coding	SEZ6L2	1	OTTHUMG00000132112.4	chr16	HAVANA	gene	29871159	29899550	-	1.39739	5.03491	20.0732	9.80564e-13	1.26088e-11	19.4339
ENSG00000039123.16	protein_coding	MTREX	2	OTTHUMG00000097019.4	chr5	HAVANA	gene	55307989	55425579	+	-0.964263	7.03638	-20.489	7.15531e-13	9.63278e-12	19.4314
ENSG00000005100.13	protein_coding	DHX33	1	OTTHUMG00000102041.3	chr17	HAVANA	gene	5440917	5468982	-	-1.1944	5.94547	-20.2597	8.50653e-13	1.1157e-11	19.418
ENSG00000104824.18	protein_coding	HNRNPL	2	OTTHUMG00000182612.3	chr19	HAVANA	gene	38836370	38852347	-	-0.813337	7.8714	-20.6213	6.48046e-13	8.87078e-12	19.4171
ENSG00000111371.16	protein_coding	SLC38A1	1	OTTHUMG00000169470.4	chr12	HAVANA	gene	46183063	46270017	-	-0.830567	9.15541	-20.8507	5.46566e-13	7.64864e-12	19.417
ENSG00000135521.9	protein_coding	LTV1	2	OTTHUMG00000015733.2	chr6	HAVANA	gene	143843338	143863812	+	-1.54028	4.84979	-20.0306	1.0131e-12	1.29847e-11	19.4164
ENSG00000111615.14	protein_coding	KRR1	2	OTTHUMG00000169759.4	chr12	HAVANA	gene	75490863	75511636	-	-1.1684	6.00505	-20.2626	8.48813e-13	1.11419e-11	19.4104
ENSG00000137822.13	protein_coding	TUBGCP4	1	OTTHUMG00000176647.3	chr15	HAVANA	gene	43369221	43409771	+	-1.07427	5.83283	-20.229	8.70736e-13	1.13929e-11	19.4087
ENSG00000123384.14	protein_coding	LRP1	1	OTTHUMG00000044412.8	chr12	HAVANA	gene	57128483	57213361	+	3.50601	3.68644	19.914	1.10807e-12	1.39929e-11	19.4019
ENSG00000135916.16	protein_coding	ITM2C	1	OTTHUMG00000133219.5	chr2	HAVANA	gene	230864639	230879248	+	0.987739	6.28017	20.2948	8.28368e-13	1.08998e-11	19.4005
ENSG00000069849.11	protein_coding	ATP1B3	1	OTTHUMG00000159081.6	chr3	HAVANA	gene	141876124	141926549	+	-0.746601	7.81558	-20.5844	6.6615e-13	9.07288e-12	19.3955
ENSG00000124357.13	protein_coding	NAGK	1	OTTHUMG00000153239.26	chr2	HAVANA	gene	71064344	71079808	+	1.06489	6.23769	20.2753	8.40655e-13	1.10526e-11	19.3941
ENSG00000100299.18	protein_coding	ARSA	2	OTTHUMG00000150180.4	chr22	HAVANA	gene	50622754	50628173	-	2.59608	4.02689	19.8479	1.16609e-12	1.46124e-11	19.3936
ENSG00000189091.13	protein_coding	SF3B3	1	OTTHUMG00000137582.8	chr16	HAVANA	gene	70523791	70577670	+	-0.882348	8.06941	-20.6256	6.45958e-13	8.84962e-12	19.3934
ENSG00000100162.15	protein_coding	CENPM	1	OTTHUMG00000151277.3	chr22	HAVANA	gene	41938737	41947152	-	-2.08226	3.84143	-19.8316	1.18089e-12	1.4774e-11	19.3768
ENSG00000076356.7	protein_coding	PLXNA2	1	OTTHUMG00000036564.7	chr1	HAVANA	gene	208022242	208244384	-	2.59802	3.11524	19.9149	1.10728e-12	1.39929e-11	19.3698
ENSG00000030066.14	protein_coding	NUP160	2	OTTHUMG00000166534.4	chr11	HAVANA	gene	47778087	47848555	-	-0.855117	6.89401	-20.3714	7.81708e-13	1.03949e-11	19.3576
ENSG00000162736.18	protein_coding	NCSTN	2	OTTHUMG00000033110.6	chr1	HAVANA	gene	160343294	160358952	+	0.899225	6.78701	20.3365	8.02606e-13	1.06468e-11	19.3542
ENSG00000069399.15	protein_coding	BCL3	1	OTTHUMG00000151517.4	chr19	HAVANA	gene	44747705	44760044	+	2.38712	4.30605	19.8081	1.20256e-12	1.49888e-11	19.347
ENSG00000154165.5	protein_coding	GPR15	2	OTTHUMG00000160017.2	chr3	HAVANA	gene	98531978	98534681	+	2.61585	4.16238	19.7888	1.22069e-12	1.51915e-11	19.3443
ENSG00000145919.11	protein_coding	BOD1	1	OTTHUMG00000130540.5	chr5	HAVANA	gene	173607145	173616659	-	-1.02906	6.00799	-20.1779	9.05233e-13	1.17407e-11	19.3398
ENSG00000160285.15	protein_coding	LSS	1	OTTHUMG00000090633.10	chr21	HAVANA	gene	46188141	46228824	-	1.06797	6.83122	20.3206	8.12324e-13	1.07466e-11	19.3389
ENSG00000126749.17	protein_coding	EMG1	2	OTTHUMG00000188247.3	chr12	HAVANA	gene	6970913	6979936	+	-1.22819	5.24381	-20.01	1.02923e-12	1.31296e-11	19.3319
ENSG00000108175.19	protein_coding	ZMIZ1	2	OTTHUMG00000018560.3	chr10	HAVANA	gene	79068966	79316519	+	1.20868	6.26929	20.196	8.92881e-13	1.15989e-11	19.3304
ENSG00000167085.14	protein_coding	PHB1	2	OTTHUMG00000134271.10	chr17	HAVANA	gene	49404049	49414905	-	-0.717682	7.92537	-20.5005	7.09335e-13	9.57309e-12	19.3139
ENSG00000130940.15	protein_coding	CASZ1	1	OTTHUMG00000002035.6	chr1	HAVANA	gene	10636604	10796650	-	1.58026	4.73228	19.8587	1.15645e-12	1.45027e-11	19.3133
ENSG00000140534.14	protein_coding	TICRR	1	OTTHUMG00000149648.6	chr15	HAVANA	gene	89575469	89631056	+	-2.07706	4.14645	-19.772	1.2367e-12	1.53673e-11	19.3102
ENSG00000164916.11	protein_coding	FOXK1	2	OTTHUMG00000151739.5	chr7	HAVANA	gene	4682295	4771442	+	-1.05174	6.16819	-20.1645	9.14542e-13	1.18426e-11	19.3046
ENSG00000138434.17	protein_coding	ITPRID2	1	OTTHUMG00000132584.5	chr2	HAVANA	gene	181891730	181930738	+	-0.803934	7.90097	-20.4793	7.20758e-13	9.67917e-12	19.3011
ENSG00000175745.15	protein_coding	NR2F1	1	OTTHUMG00000119079.5	chr5	HAVANA	gene	93583222	93594611	+	-3.23381	2.73398	-19.9828	1.0509e-12	1.33746e-11	19.294
ENSG00000164338.10	protein_coding	UTP15	1	OTTHUMG00000162453.4	chr5	HAVANA	gene	73565443	73583380	+	-1.25813	5.6151	-20.0254	1.01716e-12	1.30061e-11	19.286
ENSG00000104907.13	protein_coding	TRMT1	2	OTTHUMG00000180730.3	chr19	HAVANA	gene	13104902	13117567	-	-1.13416	5.53421	-20.0119	1.02776e-12	1.3121e-11	19.285
ENSG00000142173.17	protein_coding	COL6A2	2	OTTHUMG00000090489.8	chr21	HAVANA	gene	46098112	46132848	+	0.858508	7.2106	20.3188	8.13425e-13	1.07466e-11	19.2775
ENSG00000204525.18	protein_coding	HLA-C	2	OTTHUMG00000031154.8	chr6	HAVANA	gene	31268749	31272130	-	0.783117	7.54552	20.3758	7.79154e-13	1.03694e-11	19.274
ENSG00000138363.15	protein_coding	ATIC	2	OTTHUMG00000133023.8	chr2	HAVANA	gene	215311956	215349773	+	-0.940383	7.1235	-20.2967	8.27152e-13	1.08926e-11	19.2668
ENSG00000111653.20	protein_coding	ING4	2	OTTHUMG00000141274.7	chr12	HAVANA	gene	6650301	6663142	-	1.94204	4.37342	19.7312	1.27651e-12	1.58258e-11	19.2665
ENSG00000205208.5	protein_coding	C4orf46	1	OTTHUMG00000161919.3	chr4	HAVANA	gene	158666675	158672255	-	-2.20498	4.092	-19.7042	1.3036e-12	1.61371e-11	19.2646
ENSG00000176946.13	protein_coding	THAP4	1	OTTHUMG00000133410.4	chr2	HAVANA	gene	241584405	241637158	-	-1.07889	5.63966	-20.0035	1.03439e-12	1.3185e-11	19.2603
ENSG00000112941.14	protein_coding	TENT4A	2	OTTHUMG00000090457.7	chr5	HAVANA	gene	6713432	6757044	+	-1.05914	6.11412	-20.0785	9.76572e-13	1.25759e-11	19.2445
ENSG00000165323.16	protein_coding	FAT3	2	OTTHUMG00000154468.4	chr11	HAVANA	gene	92224818	92896473	+	-1.98844	3.83655	-19.6572	1.3523e-12	1.66515e-11	19.2395
ENSG00000112343.11	protein_coding	TRIM38	2	OTTHUMG00000014414.5	chr6	HAVANA	gene	25962802	25991231	+	1.40841	5.07423	19.8307	1.18171e-12	1.4774e-11	19.2356
ENSG00000130313.7	protein_coding	PGLS	1	OTTHUMG00000182879.3	chr19	HAVANA	gene	17511636	17521288	+	1.01806	6.15608	20.0275	1.01552e-12	1.29953e-11	19.208
ENSG00000196576.16	protein_coding	PLXNB2	2	OTTHUMG00000150219.10	chr22	HAVANA	gene	50274979	50307646	-	0.988419	7.68729	20.3125	8.17328e-13	1.07719e-11	19.207
ENSG00000166925.9	protein_coding	TSC22D4	1	OTTHUMG00000150233.3	chr7	HAVANA	gene	100463359	100479232	-	1.12929	6.4856	20.073	9.80673e-13	1.26088e-11	19.1965
ENSG00000148339.13	protein_coding	SLC25A25	1	OTTHUMG00000020736.2	chr9	HAVANA	gene	128068201	128109245	+	-1.42308	4.60019	-19.7001	1.30776e-12	1.61763e-11	19.1849
ENSG00000100632.11	protein_coding	ERH	2	OTTHUMG00000171323.3	chr14	HAVANA	gene	69380128	69398299	-	-0.925566	7.23575	-20.2126	8.81668e-13	1.14899e-11	19.1838
ENSG00000166439.6	protein_coding	RNF169	2	OTTHUMG00000165516.3	chr11	HAVANA	gene	74748849	74842413	+	-1.03553	5.88934	-19.9498	1.07793e-12	1.36759e-11	19.1765
ENSG00000122406.14	protein_coding	RPL5	2	OTTHUMG00000010899.10	chr1	HAVANA	gene	92832013	92841924	+	-0.578108	10.2727	-20.7375	5.94357e-13	8.24664e-12	19.1648
ENSG00000044090.13	protein_coding	CUL7	2	OTTHUMG00000014718.2	chr6	HAVANA	gene	43037617	43053943	-	1.84659	4.34349	19.6008	1.41316e-12	1.72574e-11	19.1634
ENSG00000052749.14	protein_coding	RRP12	2	OTTHUMG00000018855.8	chr10	HAVANA	gene	97356358	97426076	-	-1.01993	6.62695	-20.0694	9.8345e-13	1.26345e-11	19.1582
ENSG00000106415.13	protein_coding	GLCCI1	2	OTTHUMG00000151984.5	chr7	HAVANA	gene	7968796	8094272	+	1.73693	4.34901	19.5969	1.41753e-12	1.72849e-11	19.1561
ENSG00000152784.16	protein_coding	PRDM8	2	OTTHUMG00000160885.3	chr4	HAVANA	gene	80183879	80204329	+	-2.09642	3.8726	-19.5451	1.47624e-12	1.78938e-11	19.1509
ENSG00000100138.15	protein_coding	SNU13	2	OTTHUMG00000151189.9	chr22	HAVANA	gene	41673933	41690504	-	-1.08483	6.079	-19.9441	1.08265e-12	1.37251e-11	19.143
ENSG00000077150.21	protein_coding	NFKB2	2	OTTHUMG00000018962.6	chr10	HAVANA	gene	102394110	102402524	+	0.904085	7.29339	20.149	9.25388e-13	1.19735e-11	19.1311
ENSG00000234741.10	lncRNA	GAS5	2	OTTHUMG00000037216.7	chr1	HAVANA	gene	173858559	173868882	-	-0.902159	7.49729	-20.187	8.99003e-13	1.16692e-11	19.1264
ENSG00000150457.9	protein_coding	LATS2	2	OTTHUMG00000016531.2	chr13	HAVANA	gene	20973036	21061586	-	1.12683	5.50342	19.7899	1.21963e-12	1.519e-11	19.1254
ENSG00000158089.15	protein_coding	GALNT14	2	OTTHUMG00000074077.4	chr2	HAVANA	gene	30910467	31155202	-	-1.25141	5.02562	-19.6951	1.31286e-12	1.62271e-11	19.1145
ENSG00000135365.17	protein_coding	PHF21A	2	OTTHUMG00000167038.2	chr11	HAVANA	gene	45929319	46121454	-	1.40495	4.7842	19.6227	1.38923e-12	1.70291e-11	19.1109
ENSG00000140464.20	protein_coding	PML	2	OTTHUMG00000137607.6	chr15	HAVANA	gene	73994673	74047827	+	1.22189	6.14821	19.8923	1.12676e-12	1.4185e-11	19.1076
ENSG00000125885.13	protein_coding	MCM8	2	OTTHUMG00000031822.5	chr20	HAVANA	gene	5950652	5998977	+	-2.13917	3.79435	-19.4797	1.55396e-12	1.87163e-11	19.1037
ENSG00000078668.14	protein_coding	VDAC3	1	OTTHUMG00000164168.4	chr8	HAVANA	gene	42391624	42405937	+	-1.13826	6.90775	-20.0498	9.98278e-13	1.28048e-11	19.103
ENSG00000105576.16	protein_coding	TNPO2	2	OTTHUMG00000180333.3	chr19	HAVANA	gene	12699201	12724011	-	-1.12662	6.52722	-19.9767	1.05586e-12	1.34272e-11	19.1005
ENSG00000011007.13	protein_coding	ELOA	2	OTTHUMG00000002957.3	chr1	HAVANA	gene	23743448	23762059	+	-0.91298	6.79019	-20.0276	1.01545e-12	1.29953e-11	19.0991
ENSG00000099194.6	protein_coding	SCD	2	OTTHUMG00000018906.3	chr10	HAVANA	gene	100347233	100364826	+	0.805061	9.06624	20.4237	7.51515e-13	1.00426e-11	19.0981
ENSG00000101213.7	protein_coding	PTK6	2	OTTHUMG00000033039.3	chr20	HAVANA	gene	63528001	63537376	-	1.77759	4.94567	19.6115	1.40142e-12	1.71269e-11	19.0944
ENSG00000113456.20	protein_coding	RAD1	2	OTTHUMG00000090783.4	chr5	HAVANA	gene	34905260	34918989	-	-1.31791	5.06655	-19.6653	1.34375e-12	1.65587e-11	19.0859
ENSG00000196313.13	protein_coding	POM121	2	OTTHUMG00000023527.5	chr7	HAVANA	gene	72879349	72951440	+	-0.951214	6.20621	-19.9007	1.11948e-12	1.41152e-11	19.0855
ENSG00000074855.11	protein_coding	ANO8	2	OTTHUMG00000182665.2	chr19	HAVANA	gene	17323223	17334855	-	2.67484	3.83811	19.4473	1.59414e-12	1.91098e-11	19.0829
ENSG00000112655.16	protein_coding	PTK7	2	OTTHUMG00000014721.5	chr6	HAVANA	gene	43076307	43161719	+	1.03751	6.3582	19.9029	1.11758e-12	1.41022e-11	19.077
ENSG00000159199.14	protein_coding	ATP5MC1	2	OTTHUMG00000160520.5	chr17	HAVANA	gene	48892765	48895871	+	-1.05591	6.08918	-19.861	1.15435e-12	1.44988e-11	19.0737
ENSG00000120738.8	protein_coding	EGR1	2	OTTHUMG00000129197.3	chr5	HAVANA	gene	138465479	138469303	+	-5.62446	2.18943	-21.6381	3.08619e-13	4.66736e-12	19.0684
ENSG00000139636.16	protein_coding	LMBR1L	1	OTTHUMG00000150511.4	chr12	HAVANA	gene	49097136	49110900	-	1.5396	4.92513	19.5775	1.43921e-12	1.751e-11	19.0597
ENSG00000107957.17	protein_coding	SH3PXD2A	2	OTTHUMG00000018997.2	chr10	HAVANA	gene	103594027	103855584	-	-1.02986	6.11567	-19.8364	1.1765e-12	1.47316e-11	19.0492
ENSG00000160193.12	protein_coding	WDR4	2	OTTHUMG00000086826.2	chr21	HAVANA	gene	42843094	42879568	-	-1.5113	4.88012	-19.5764	1.44047e-12	1.75123e-11	19.0482
ENSG00000152127.9	protein_coding	MGAT5	1	OTTHUMG00000131681.5	chr2	HAVANA	gene	134119983	134454621	+	-0.957158	6.67082	-19.9391	1.0869e-12	1.37575e-11	19.0459
ENSG00000089127.15	protein_coding	OAS1	1	OTTHUMG00000169792.7	chr12	HAVANA	gene	112905856	112933219	+	1.98149	3.82062	19.3942	1.66239e-12	1.98403e-11	19.0387
ENSG00000237172.4	protein_coding	B3GNT9	2	OTTHUMG00000173315.2	chr16	HAVANA	gene	67148104	67150998	-	1.31814	5.35993	19.6319	1.37927e-12	1.69324e-11	19.0276
ENSG00000126698.11	protein_coding	DNAJC8	1	OTTHUMG00000003538.4	chr1	HAVANA	gene	28199456	28233029	-	-1.01386	6.87919	-19.9526	1.07562e-12	1.36572e-11	19.0271
ENSG00000111605.18	protein_coding	CPSF6	2	OTTHUMG00000169340.4	chr12	HAVANA	gene	69239569	69274358	+	-0.924525	6.58393	-19.8763	1.14076e-12	1.43391e-11	19.0078
ENSG00000148346.12	protein_coding	LCN2	2	OTTHUMG00000020734.1	chr9	HAVANA	gene	128149071	128153453	+	1.81988	4.14501	19.3647	1.7016e-12	2.02638e-11	18.9925
ENSG00000139793.21	protein_coding	MBNL2	2	OTTHUMG00000017239.4	chr13	HAVANA	gene	97221434	97394120	+	1.7505	5.93906	19.6379	1.37279e-12	1.68656e-11	18.9564
ENSG00000165240.22	protein_coding	ATP7A	2	OTTHUMG00000021885.4	chrX	HAVANA	gene	77910690	78050395	+	1.82124	4.16299	19.3152	1.76962e-12	2.09972e-11	18.9512
ENSG00000157654.19	protein_coding	PALM2AKAP2	2	OTTHUMG00000156812.5	chr9	HAVANA	gene	109498325	110172512	+	-1.08333	6.72966	-19.8154	1.19584e-12	1.49279e-11	18.9391
ENSG00000126216.15	protein_coding	TUBGCP3	2	OTTHUMG00000017367.8	chr13	HAVANA	gene	112485011	112588205	-	-1.32198	4.97186	-19.4608	1.5773e-12	1.89218e-11	18.9351
ENSG00000116016.14	protein_coding	EPAS1	1	OTTHUMG00000128818.25	chr2	HAVANA	gene	46293667	46386697	+	-1.01659	6.03853	-19.6787	1.3298e-12	1.63992e-11	18.9333
ENSG00000169136.13	protein_coding	ATF5	2	OTTHUMG00000183065.5	chr19	HAVANA	gene	49928702	49933935	+	-1.10624	5.79659	-19.6207	1.39133e-12	1.7042e-11	18.9268
ENSG00000223496.3	protein_coding	EXOSC6	2	OTTHUMG00000137578.2	chr16	HAVANA	gene	70246778	70251940	-	-1.2725	5.16458	-19.4884	1.54345e-12	1.86418e-11	18.9256
ENSG00000110719.11	protein_coding	TCIRG1	1	OTTHUMG00000167358.6	chr11	HAVANA	gene	68039025	68050895	+	1.96529	6.01587	19.5972	1.41714e-12	1.72849e-11	18.9217
ENSG00000070190.13	protein_coding	DAPP1	2	OTTHUMG00000160974.3	chr4	HAVANA	gene	99816827	99870190	+	1.57869	4.37454	19.3136	1.77193e-12	2.10093e-11	18.9207
ENSG00000167608.12	protein_coding	TMC4	1	OTTHUMG00000066485.28	chr19	HAVANA	gene	54160108	54173250	-	2.59147	4.12402	19.2457	1.87e-12	2.20119e-11	18.917
ENSG00000138750.16	protein_coding	NUP54	1	OTTHUMG00000130098.5	chr4	HAVANA	gene	76107562	76148485	-	-1.20516	5.33974	-19.5098	1.51765e-12	1.83726e-11	18.9132
ENSG00000100605.17	protein_coding	ITPK1	2	OTTHUMG00000171226.5	chr14	HAVANA	gene	92936914	93116320	-	0.745362	7.92449	19.9893	1.04568e-12	1.33185e-11	18.9107
ENSG00000101224.18	protein_coding	CDC25B	2	OTTHUMG00000031764.3	chr20	HAVANA	gene	3786772	3806121	+	-0.919679	6.79401	-19.7874	1.22199e-12	1.51962e-11	18.9046
ENSG00000174547.13	protein_coding	MRPL11	1	OTTHUMG00000167097.2	chr11	HAVANA	gene	66435075	66466738	-	-1.02892	6.02857	-19.6388	1.37181e-12	1.68656e-11	18.9026
ENSG00000113758.14	protein_coding	DBN1	1	OTTHUMG00000130856.7	chr5	HAVANA	gene	177456608	177474401	-	0.889218	7.095	19.8293	1.183e-12	1.47789e-11	18.9018
ENSG00000159147.18	protein_coding	DONSON	1	OTTHUMG00000065904.10	chr21	HAVANA	gene	33559542	33588706	-	-1.27941	5.03184	-19.4182	1.6311e-12	1.95385e-11	18.8899
ENSG00000159231.6	protein_coding	CBR3	2	OTTHUMG00000086617.2	chr21	HAVANA	gene	36135079	36146562	+	-1.70526	3.9998	-19.2348	1.88632e-12	2.21721e-11	18.8867
ENSG00000138134.12	protein_coding	STAMBPL1	2	OTTHUMG00000018702.3	chr10	HAVANA	gene	88879734	88975153	+	-1.86207	3.94664	-19.2068	1.92885e-12	2.25905e-11	18.872
ENSG00000149115.14	protein_coding	TNKS1BP1	2	OTTHUMG00000167022.4	chr11	HAVANA	gene	57299638	57324952	-	0.805072	7.46377	19.8588	1.1563e-12	1.45027e-11	18.8712
ENSG00000069275.13	protein_coding	NUCKS1	2	OTTHUMG00000035996.2	chr1	HAVANA	gene	205712822	205750182	-	-1.02403	8.37313	-20.0157	1.02476e-12	1.3093e-11	18.8663
ENSG00000104946.14	protein_coding	TBC1D17	1	OTTHUMG00000183376.4	chr19	HAVANA	gene	49877666	49888750	+	1.35945	5.03007	19.3671	1.69843e-12	2.02408e-11	18.8661
ENSG00000105429.13	protein_coding	MEGF8	2	OTTHUMG00000150342.3	chr19	HAVANA	gene	42325609	42378769	+	1.29455	5.56353	19.4729	1.56233e-12	1.87837e-11	18.8647
ENSG00000165283.16	protein_coding	STOML2	2	OTTHUMG00000019851.4	chr9	HAVANA	gene	35099776	35103195	-	-0.878148	6.68749	-19.7191	1.28855e-12	1.5963e-11	18.8641
ENSG00000272391.6	protein_coding	POM121C	2	OTTHUMG00000156238.11	chr7	HAVANA	gene	75416786	75486299	-	-1.01268	6.01062	-19.5866	1.42901e-12	1.7399e-11	18.8625
ENSG00000158555.15	protein_coding	GDPD5	1	OTTHUMG00000165484.3	chr11	HAVANA	gene	75434640	75525941	-	1.60476	4.61323	19.2532	1.85891e-12	2.18973e-11	18.8424
ENSG00000005238.20	protein_coding	ATOSB	2	OTTHUMG00000019847.6	chr9	HAVANA	gene	35104112	35116341	-	2.3321	3.5694	19.1342	2.04408e-12	2.38122e-11	18.8341
ENSG00000149418.11	protein_coding	ST14	2	OTTHUMG00000165768.2	chr11	HAVANA	gene	130159782	130210362	+	0.700882	8.23501	19.9401	1.08604e-12	1.37573e-11	18.8263
ENSG00000144580.15	protein_coding	CNOT9	1	OTTHUMG00000154750.2	chr2	HAVANA	gene	218568580	218597080	+	-0.904567	6.57916	-19.6512	1.35861e-12	1.67165e-11	18.8251
ENSG00000141499.18	protein_coding	WRAP53	1	OTTHUMG00000134323.4	chr17	HAVANA	gene	7686071	7703502	+	-1.51293	4.30445	-19.1984	1.94179e-12	2.27257e-11	18.8201
ENSG00000164176.13	protein_coding	EDIL3	2	OTTHUMG00000119047.3	chr5	HAVANA	gene	83940554	84384880	-	3.96489	3.45685	19.2397	1.87896e-12	2.21015e-11	18.8153
ENSG00000090861.17	protein_coding	AARS1	1	OTTHUMG00000177042.7	chr16	HAVANA	gene	70251983	70289707	-	-0.870204	7.94202	-19.879	1.13845e-12	1.43211e-11	18.8151
ENSG00000108468.15	protein_coding	CBX1	2	OTTHUMG00000150417.5	chr17	HAVANA	gene	48070052	48101478	-	-0.837675	7.2928	-19.7566	1.2516e-12	1.55407e-11	18.8071
ENSG00000100413.17	protein_coding	POLR3H	2	OTTHUMG00000150971.2	chr22	HAVANA	gene	41525799	41544606	-	-1.04405	5.99136	-19.5095	1.518e-12	1.83726e-11	18.803
ENSG00000133195.12	protein_coding	SLC39A11	1	OTTHUMG00000178306.5	chr17	HAVANA	gene	72645949	73092712	-	1.63902	4.11082	19.1317	2.04807e-12	2.38328e-11	18.8028
ENSG00000204628.12	protein_coding	RACK1	1	OTTHUMG00000163380.15	chr5	HAVANA	gene	181236897	181248096	-	-0.50211	10.1237	-20.2525	8.55325e-13	1.12093e-11	18.8027
ENSG00000266028.8	protein_coding	SRGAP2	2	OTTHUMG00000184381.5	chr1	HAVANA	gene	206203346	206464436	+	1.03426	6.3144	19.5545	1.46531e-12	1.77878e-11	18.8005
ENSG00000168016.15	protein_coding	TRANK1	1	OTTHUMG00000155848.6	chr3	HAVANA	gene	36826819	36945057	-	3.69929	3.03077	19.3314	1.74706e-12	2.07446e-11	18.8003
ENSG00000213585.11	protein_coding	VDAC1	2	OTTHUMG00000129118.4	chr5	HAVANA	gene	133971871	134004975	-	-0.680866	8.17076	-19.8972	1.12249e-12	1.41422e-11	18.7962
ENSG00000127586.17	protein_coding	CHTF18	2	OTTHUMG00000047838.6	chr16	HAVANA	gene	788046	800737	+	-1.8199	4.73725	-19.2272	1.89786e-12	2.22596e-11	18.7946
ENSG00000174307.7	protein_coding	PHLDA3	2	OTTHUMG00000035767.4	chr1	HAVANA	gene	201464278	201469237	-	1.09692	5.98371	19.4794	1.55443e-12	1.87163e-11	18.7938
ENSG00000092820.19	protein_coding	EZR	2	OTTHUMG00000015917.2	chr6	HAVANA	gene	158765741	158819368	-	0.554477	10.0276	20.2196	8.76953e-13	1.14467e-11	18.7935
ENSG00000119801.13	protein_coding	YPEL5	2	OTTHUMG00000097839.5	chr2	HAVANA	gene	30146941	30160533	+	1.76064	5.11564	19.272	1.83142e-12	2.16674e-11	18.7907
ENSG00000005007.14	protein_coding	UPF1	2	OTTHUMG00000183025.2	chr19	HAVANA	gene	18831959	18868230	+	-0.713691	7.72424	-19.811	1.19987e-12	1.49667e-11	18.7895
ENSG00000129534.14	protein_coding	MIS18BP1	2	OTTHUMG00000140266.5	chr14	HAVANA	gene	45203190	45253540	-	-1.36969	5.1456	-19.3068	1.78148e-12	2.10918e-11	18.7829
ENSG00000141012.13	protein_coding	GALNS	1	OTTHUMG00000137862.6	chr16	HAVANA	gene	88813734	88856970	-	1.70046	4.33696	19.1337	2.04484e-12	2.38122e-11	18.7828
ENSG00000146143.19	protein_coding	PRIM2	2	OTTHUMG00000016190.8	chr6	HAVANA	gene	57314805	57646850	+	-1.33509	4.71803	-19.2272	1.89783e-12	2.22596e-11	18.7828
ENSG00000011485.15	protein_coding	PPP5C	1	OTTHUMG00000134287.6	chr19	HAVANA	gene	46347087	46392981	+	-0.934635	6.44809	-19.5708	1.44681e-12	1.75763e-11	18.7796
ENSG00000127084.19	protein_coding	FGD3	2	OTTHUMG00000021032.8	chr9	HAVANA	gene	92947523	93036236	+	2.25865	3.60252	19.0624	2.16507e-12	2.49697e-11	18.7782
ENSG00000187837.4	protein_coding	H1-2	2	OTTHUMG00000016140.2	chr6	HAVANA	gene	26055740	26056470	-	1.99824	3.95011	19.0651	2.16038e-12	2.49438e-11	18.7696
ENSG00000157227.14	protein_coding	MMP14	1	OTTHUMG00000028704.5	chr14	HAVANA	gene	22836560	22849041	+	0.855198	7.67549	19.7481	1.25989e-12	1.56317e-11	18.7517
ENSG00000183527.12	protein_coding	PSMG1	2	OTTHUMG00000066034.6	chr21	HAVANA	gene	39174769	39183488	-	-1.2521	5.81903	-19.4067	1.64604e-12	1.96837e-11	18.7516
ENSG00000166068.13	protein_coding	SPRED1	2	OTTHUMG00000172377.4	chr15	HAVANA	gene	38252836	38357249	+	-2.21932	3.63221	-19.0056	2.26621e-12	2.59088e-11	18.7317
ENSG00000176658.17	protein_coding	MYO1D	1	OTTHUMG00000179636.3	chr17	HAVANA	gene	32492522	32877177	-	0.942907	7.2614	19.6296	1.38174e-12	1.695e-11	18.7154
ENSG00000000460.17	protein_coding	FIRRM	2	OTTHUMG00000035821.9	chr1	HAVANA	gene	169662007	169854080	+	-1.58857	4.25335	-19.0555	2.17712e-12	2.50308e-11	18.7112
ENSG00000040199.18	protein_coding	PHLPP2	1	OTTHUMG00000176867.2	chr16	HAVANA	gene	71637835	71724701	-	-1.2683	5.34291	-19.2548	1.85663e-12	2.18862e-11	18.705
ENSG00000276850.5	lncRNA	ENSG00000276850	2	OTTHUMG00000189091.4	chr10	HAVANA	gene	47908064	47991877	-	1.0968	5.96948	19.358	1.71062e-12	2.03563e-11	18.6962
ENSG00000132300.19	protein_coding	PTCD3	2	OTTHUMG00000153168.6	chr2	HAVANA	gene	86106223	86142157	+	-0.98996	6.05951	-19.379	1.68247e-12	2.00653e-11	18.6838
ENSG00000165480.16	protein_coding	SKA3	1	OTTHUMG00000016539.5	chr13	HAVANA	gene	21153595	21176552	-	-2.63004	4.36466	-18.9913	2.2924e-12	2.61716e-11	18.6799
ENSG00000178691.11	protein_coding	SUZ12	2	OTTHUMG00000132813.3	chr17	HAVANA	gene	31937007	32001038	+	-1.31373	6.2846	-19.4061	1.64685e-12	1.96837e-11	18.6775
ENSG00000126391.14	protein_coding	FRMD8	2	OTTHUMG00000166275.4	chr11	HAVANA	gene	65386621	65413525	+	1.05242	6.73486	19.476	1.55853e-12	1.87518e-11	18.6706
ENSG00000110660.15	protein_coding	SLC35F2	2	OTTHUMG00000166366.4	chr11	HAVANA	gene	107790991	107928293	-	-0.891299	6.70756	-19.4844	1.54829e-12	1.867e-11	18.6688
ENSG00000139083.11	protein_coding	ETV6	1	OTTHUMG00000168538.3	chr12	HAVANA	gene	11649674	11895377	+	1.08522	5.65951	19.261	1.84745e-12	2.18254e-11	18.6666
ENSG00000144583.5	protein_coding	MARCHF4	2	OTTHUMG00000154824.3	chr2	HAVANA	gene	216257865	216372483	-	-3.18493	2.86227	-19.062	2.16569e-12	2.49697e-11	18.6638
ENSG00000128342.5	protein_coding	LIF	2	OTTHUMG00000150910.3	chr22	HAVANA	gene	30240453	30246759	-	-1.68391	5.00136	-19.1154	2.07498e-12	2.40591e-11	18.6577
ENSG00000005020.13	protein_coding	SKAP2	2	OTTHUMG00000023495.5	chr7	HAVANA	gene	26667068	26995239	-	1.11712	6.44352	19.3985	1.65672e-12	1.97872e-11	18.654
ENSG00000188554.15	protein_coding	NBR1	1	OTTHUMG00000180878.2	chr17	HAVANA	gene	43170481	43211689	+	0.796403	7.4838	19.5955	1.41902e-12	1.72902e-11	18.6531
ENSG00000183763.9	protein_coding	TRAIP	2	OTTHUMG00000158269.4	chr3	HAVANA	gene	49828601	49856574	-	-1.83499	3.73277	-18.9143	2.43933e-12	2.76362e-11	18.6492
ENSG00000095485.18	protein_coding	CWF19L1	2	OTTHUMG00000018901.7	chr10	HAVANA	gene	100232298	100267680	-	-1.31389	5.08314	-19.121	2.06571e-12	2.39867e-11	18.6382
ENSG00000138685.18	protein_coding	FGF2	2	OTTHUMG00000039506.5	chr4	HAVANA	gene	122826682	122898236	+	-1.37847	5.62769	-19.2157	1.91521e-12	2.24469e-11	18.6287
ENSG00000117592.9	protein_coding	PRDX6	2	OTTHUMG00000034804.2	chr1	HAVANA	gene	173477330	173488815	+	-0.713773	7.70913	-19.6117	1.40119e-12	1.71269e-11	18.6285
ENSG00000174327.7	protein_coding	SLC16A13	2	OTTHUMG00000102089.3	chr17	HAVANA	gene	7036015	7040117	+	1.99973	4.35483	18.926	2.41634e-12	2.74211e-11	18.6215
ENSG00000127423.11	protein_coding	AUNIP	2	OTTHUMG00000007372.2	chr1	HAVANA	gene	25831913	25859458	-	-2.39472	3.17687	-18.8817	2.5045e-12	2.82959e-11	18.6202
ENSG00000113070.8	protein_coding	HBEGF	2	OTTHUMG00000129496.5	chr5	HAVANA	gene	140332843	140346603	-	-1.10443	5.47529	-19.178	1.97372e-12	2.30663e-11	18.6154
ENSG00000115875.19	protein_coding	SRSF7	2	OTTHUMG00000102076.6	chr2	HAVANA	gene	38743599	38751494	-	-0.84209	6.98244	-19.4639	1.5734e-12	1.88889e-11	18.6112
ENSG00000126773.13	protein_coding	PCNX4	2	OTTHUMG00000150361.6	chr14	HAVANA	gene	60091911	60169133	+	-0.779414	7.20895	-19.4857	1.54671e-12	1.86647e-11	18.5962
ENSG00000185561.10	protein_coding	TLCD2	1	OTTHUMG00000132477.6	chr17	HAVANA	gene	1702816	1710377	-	3.69817	3.1006	19.0195	2.24099e-12	2.56925e-11	18.5864
ENSG00000244509.4	protein_coding	APOBEC3C	2	OTTHUMG00000151087.4	chr22	HAVANA	gene	39014257	39020352	+	1.14553	5.43207	19.1157	2.07451e-12	2.40591e-11	18.5859
ENSG00000182307.14	protein_coding	C8orf33	2	OTTHUMG00000165256.3	chr8	HAVANA	gene	145052465	145066685	+	-0.969674	6.05055	-19.256	1.85473e-12	2.18796e-11	18.5829
ENSG00000099994.11	protein_coding	SUSD2	2	OTTHUMG00000150792.2	chr22	HAVANA	gene	24181487	24189106	+	2.065	4.10393	18.8353	2.60053e-12	2.91786e-11	18.5737
ENSG00000147874.11	protein_coding	HAUS6	2	OTTHUMG00000019622.4	chr9	HAVANA	gene	19053141	19102904	-	-1.58252	5.20764	-19.0563	2.17572e-12	2.50308e-11	18.5724
ENSG00000177426.22	protein_coding	TGIF1	1	OTTHUMG00000131511.11	chr18	HAVANA	gene	3411608	3459978	+	1.26472	4.94449	18.9964	2.28299e-12	2.60824e-11	18.5699
ENSG00000164442.11	protein_coding	CITED2	2	OTTHUMG00000015691.3	chr6	HAVANA	gene	139371807	139374648	-	1.71936	6.00317	19.1755	1.97766e-12	2.30958e-11	18.5647
ENSG00000105926.16	protein_coding	PALS2	2	OTTHUMG00000023507.11	chr7	HAVANA	gene	24573268	24694193	+	-1.54231	4.52493	-18.8934	2.48085e-12	2.8087e-11	18.5408
ENSG00000198911.13	protein_coding	SREBF2	1	OTTHUMG00000151261.3	chr22	HAVANA	gene	41833105	41907306	+	0.971409	6.68608	19.3124	1.77361e-12	2.10139e-11	18.5405
ENSG00000051108.15	protein_coding	HERPUD1	1	OTTHUMG00000133276.10	chr16	HAVANA	gene	56932142	56944864	+	1.08596	5.93819	19.1625	1.99831e-12	2.33036e-11	18.5389
ENSG00000166411.14	protein_coding	IDH3A	2	OTTHUMG00000143732.12	chr15	HAVANA	gene	78131498	78171945	+	-1.03137	6.04195	-19.197	1.94408e-12	2.27362e-11	18.5364
ENSG00000166012.17	protein_coding	TAF1D	2	OTTHUMG00000167451.6	chr11	HAVANA	gene	93729948	93784391	-	-0.912606	7.22694	-19.4138	1.63683e-12	1.95926e-11	18.5353
ENSG00000164985.15	protein_coding	PSIP1	2	OTTHUMG00000021021.3	chr9	HAVANA	gene	15464066	15510995	-	-1.29999	5.44835	-19.0537	2.18022e-12	2.50488e-11	18.5213
ENSG00000144036.16	protein_coding	EXOC6B	2	OTTHUMG00000152723.3	chr2	HAVANA	gene	72175984	72826041	-	1.09959	5.93909	19.1146	2.07638e-12	2.40591e-11	18.4989
ENSG00000213390.11	protein_coding	ARHGAP19	2	OTTHUMG00000018845.8	chr10	HAVANA	gene	97222173	97292673	-	-1.92798	3.56487	-18.7163	2.86501e-12	3.16881e-11	18.4967
ENSG00000047410.14	protein_coding	TPR	2	OTTHUMG00000035580.5	chr1	HAVANA	gene	186311652	186375693	-	-0.78621	7.80907	-19.4668	1.56987e-12	1.88605e-11	18.4952
ENSG00000143321.19	protein_coding	HDGF	2	OTTHUMG00000041295.2	chr1	HAVANA	gene	156742109	156766925	-	-0.650192	8.68434	-19.6176	1.39474e-12	1.70709e-11	18.4948
ENSG00000178105.12	protein_coding	DDX10	1	OTTHUMG00000166540.4	chr11	HAVANA	gene	108665058	108940999	+	-1.26547	5.85678	-19.0964	2.10685e-12	2.43949e-11	18.488
ENSG00000153944.12	protein_coding	MSI2	2	OTTHUMG00000178398.4	chr17	HAVANA	gene	57255851	57684689	+	1.21647	5.38301	18.9724	2.32756e-12	2.64987e-11	18.4768
ENSG00000179051.14	protein_coding	RCC2	2	OTTHUMG00000002513.2	chr1	HAVANA	gene	17406760	17439677	-	-0.799594	7.29051	-19.3498	1.72181e-12	2.04746e-11	18.4721
ENSG00000075856.12	protein_coding	SART3	1	OTTHUMG00000169449.6	chr12	HAVANA	gene	108522214	108561400	-	-1.07809	6.196	-19.1262	2.05705e-12	2.39202e-11	18.4535
ENSG00000130707.18	protein_coding	ASS1	2	OTTHUMG00000020806.5	chr9	HAVANA	gene	130444961	130501274	+	1.9517	3.9004	18.668	2.9803e-12	3.28075e-11	18.4479
ENSG00000125977.7	protein_coding	EIF2S2	2	OTTHUMG00000032287.3	chr20	HAVANA	gene	34088309	34112243	-	-0.932007	7.43061	-19.3375	1.73857e-12	2.06589e-11	18.4431
ENSG00000129810.15	protein_coding	SGO1	2	OTTHUMG00000130479.7	chr3	HAVANA	gene	20160593	20186206	-	-2.13215	3.34529	-18.6409	3.04727e-12	3.34769e-11	18.4382
ENSG00000181019.13	protein_coding	NQO1	1	OTTHUMG00000137575.3	chr16	HAVANA	gene	69706996	69726668	-	0.624783	8.75828	19.552	1.4682e-12	1.78096e-11	18.4338
ENSG00000101444.13	protein_coding	AHCY	2	OTTHUMG00000140098.4	chr20	HAVANA	gene	34280268	34311802	-	-0.687582	8.37962	-19.4882	1.54366e-12	1.86418e-11	18.4312
ENSG00000136950.13	protein_coding	ARPC5L	2	OTTHUMG00000020660.2	chr9	HAVANA	gene	124862130	124877733	+	-0.997826	6.17426	-19.0873	2.12219e-12	2.45377e-11	18.4227
ENSG00000198000.12	protein_coding	NOL8	1	OTTHUMG00000020221.7	chr9	HAVANA	gene	92297358	92325636	-	-1.02646	5.81938	-19.0124	2.25379e-12	2.5785e-11	18.4182
ENSG00000099995.19	protein_coding	SF3A1	2	OTTHUMG00000151005.5	chr22	HAVANA	gene	30331988	30356919	-	-0.900832	7.18648	-19.2637	1.84344e-12	2.17938e-11	18.4162
ENSG00000106344.8	protein_coding	RBM28	1	OTTHUMG00000157711.3	chr7	HAVANA	gene	128297685	128343908	-	-1.20041	5.73243	-18.9852	2.30363e-12	2.6263e-11	18.414
ENSG00000049130.16	protein_coding	KITLG	2	OTTHUMG00000169888.6	chr12	HAVANA	gene	88492793	88580851	-	1.75672	4.80072	18.7556	2.77459e-12	3.08765e-11	18.4107
ENSG00000221968.9	protein_coding	FADS3	1	OTTHUMG00000167500.5	chr11	HAVANA	gene	61873519	61892051	-	1.75024	5.1656	18.7865	2.7056e-12	3.01912e-11	18.3801
ENSG00000204175.6	protein_coding	GPRIN2	2	OTTHUMG00000018107.1	chr10	HAVANA	gene	46541736	46556658	-	2.8255	3.36441	18.5868	3.18536e-12	3.48296e-11	18.3723
ENSG00000115816.15	protein_coding	CEBPZ	1	OTTHUMG00000100960.4	chr2	HAVANA	gene	37201612	37231596	-	-1.00046	6.40537	-19.058	2.17262e-12	2.50308e-11	18.3617
ENSG00000179958.10	protein_coding	DCTPP1	1	OTTHUMG00000132416.5	chr16	HAVANA	gene	30423615	30430030	-	-1.11684	5.53741	-18.8864	2.49498e-12	2.82079e-11	18.3612
ENSG00000198682.13	protein_coding	PAPSS2	2	OTTHUMG00000018683.3	chr10	HAVANA	gene	87659613	87747705	+	1.03396	6.29787	19.0179	2.24386e-12	2.57074e-11	18.3572
ENSG00000111231.9	protein_coding	GPN3	1	OTTHUMG00000169524.6	chr12	HAVANA	gene	110452486	110469268	-	-1.60218	4.29935	-18.6304	3.07353e-12	3.37199e-11	18.3532
ENSG00000106351.13	protein_coding	AGFG2	2	OTTHUMG00000156029.2	chr7	HAVANA	gene	100539203	100568220	+	1.15792	5.18114	18.7643	2.75513e-12	3.0681e-11	18.3334
ENSG00000102038.16	protein_coding	SMARCA1	2	OTTHUMG00000022370.4	chrX	HAVANA	gene	129446501	129523500	-	0.916388	6.50062	19.0237	2.23343e-12	2.5624e-11	18.3267
ENSG00000153714.6	protein_coding	LURAP1L	2	OTTHUMG00000019557.2	chr9	HAVANA	gene	12775020	12823060	+	1.23058	5.1049	18.7376	2.8156e-12	3.12689e-11	18.326
ENSG00000174151.15	protein_coding	CYB561D1	1	OTTHUMG00000011051.6	chr1	HAVANA	gene	109494052	109502932	+	1.13749	5.48421	18.8159	2.64181e-12	2.9601e-11	18.3255
ENSG00000185624.16	protein_coding	P4HB	1	OTTHUMG00000150269.8	chr17	HAVANA	gene	81843159	81860856	-	0.528049	10.2613	19.6806	1.3278e-12	1.63922e-11	18.3199
ENSG00000122862.5	protein_coding	SRGN	2	OTTHUMG00000018369.2	chr10	HAVANA	gene	69088103	69104805	+	-1.46339	5.15244	-18.7474	2.79317e-12	3.10622e-11	18.3185
ENSG00000126453.11	protein_coding	BCL2L12	1	OTTHUMG00000183239.2	chr19	HAVANA	gene	49665142	49673916	+	-1.42468	4.87249	-18.6622	2.99456e-12	3.29422e-11	18.2908
ENSG00000189223.15	lncRNA	PAX8-AS1	1	OTTHUMG00000153340.15	chr2	HAVANA	gene	113211421	113276581	+	1.03328	6.53591	18.9754	2.32192e-12	2.6453e-11	18.2835
ENSG00000006625.18	protein_coding	GGCT	1	OTTHUMG00000128593.3	chr7	HAVANA	gene	30496621	30504841	-	-1.24752	5.20331	-18.718	2.86113e-12	3.16667e-11	18.2784
ENSG00000166123.14	protein_coding	GPT2	2	OTTHUMG00000132541.5	chr16	HAVANA	gene	46884362	46931289	+	-0.995486	6.01717	-18.8797	2.5086e-12	2.83174e-11	18.2732
ENSG00000183597.16	protein_coding	TANGO2	2	OTTHUMG00000150510.26	chr22	HAVANA	gene	20017014	20067164	+	1.2848	4.91689	18.6338	3.06496e-12	3.36485e-11	18.2709
ENSG00000084234.18	protein_coding	APLP2	1	OTTHUMG00000165767.5	chr11	HAVANA	gene	130068147	130144811	+	0.581524	9.56411	19.4942	1.53643e-12	1.85819e-11	18.2699
ENSG00000071553.18	protein_coding	ATP6AP1	1	OTTHUMG00000033291.11	chrX	HAVANA	gene	154428633	154436516	+	0.663213	8.19883	19.2573	1.85293e-12	2.18743e-11	18.2686
ENSG00000104763.20	protein_coding	ASAH1	2	OTTHUMG00000096997.20	chr8	HAVANA	gene	18055992	18084998	-	1.03966	6.11415	18.8704	2.52756e-12	2.84774e-11	18.263
ENSG00000106853.20	protein_coding	PTGR1	2	OTTHUMG00000020493.11	chr9	HAVANA	gene	111549722	111599893	-	0.930047	6.62636	18.9558	2.35888e-12	2.68179e-11	18.2498
ENSG00000170004.19	protein_coding	CHD3	1	OTTHUMG00000150427.5	chr17	HAVANA	gene	7884796	7912760	+	0.813819	7.06164	19.0332	2.21637e-12	2.54461e-11	18.2464
ENSG00000172819.17	protein_coding	RARG	2	OTTHUMG00000048077.5	chr12	HAVANA	gene	53210567	53232980	-	1.82994	4.23791	18.4659	3.51904e-12	3.79688e-11	18.2455
ENSG00000058600.16	protein_coding	POLR3E	2	OTTHUMG00000094779.4	chr16	HAVANA	gene	22297375	22335101	+	-1.1449	5.22113	-18.6781	2.95592e-12	3.26051e-11	18.2389
ENSG00000184990.13	protein_coding	SIVA1	2	OTTHUMG00000170819.4	chr14	HAVANA	gene	104753147	104768494	+	-1.22892	6.20548	-18.867	2.53461e-12	2.85371e-11	18.2369
ENSG00000198363.18	protein_coding	ASPH	2	OTTHUMG00000164375.13	chr8	HAVANA	gene	61500556	61714640	-	-0.951005	8.25934	-19.2297	1.89394e-12	2.22456e-11	18.2349
ENSG00000105404.11	protein_coding	RABAC1	1	OTTHUMG00000182737.2	chr19	HAVANA	gene	41956681	41959321	-	1.5165	4.40019	18.489	3.45255e-12	3.74248e-11	18.2333
ENSG00000132182.13	protein_coding	NUP210	2	OTTHUMG00000157268.3	chr3	HAVANA	gene	13316235	13420322	-	-1.00385	6.18028	-18.8613	2.54633e-12	2.86493e-11	18.2313
ENSG00000163817.17	protein_coding	SLC6A20	1	OTTHUMG00000133446.9	chr3	HAVANA	gene	45755449	45796574	-	3.44821	2.50326	18.789	2.70015e-12	3.0151e-11	18.2252
ENSG00000130382.9	protein_coding	MLLT1	2	OTTHUMG00000180757.3	chr19	HAVANA	gene	6210381	6279975	-	-0.822154	7.05532	-19.0131	2.25246e-12	2.5785e-11	18.2239
ENSG00000147224.13	protein_coding	PRPS1	2	OTTHUMG00000022167.3	chrX	HAVANA	gene	107628428	107651993	+	-1.07487	6.15453	-18.8368	2.59726e-12	2.9162e-11	18.2162
ENSG00000089327.15	protein_coding	FXYD5	1	OTTHUMG00000048092.3	chr19	HAVANA	gene	35154730	35169881	+	-0.815425	7.39089	-19.0555	2.17703e-12	2.50308e-11	18.2114
ENSG00000156011.19	protein_coding	PSD3	2	OTTHUMG00000163711.3	chr8	HAVANA	gene	18527303	19084730	-	1.18347	5.70108	18.7204	2.85533e-12	3.16454e-11	18.2095
ENSG00000160310.19	protein_coding	PRMT2	1	OTTHUMG00000048806.6	chr21	HAVANA	gene	46635595	46665124	+	1.01772	6.13655	18.8084	2.65789e-12	2.97403e-11	18.2057
ENSG00000166582.11	protein_coding	CENPV	2	OTTHUMG00000059345.5	chr17	HAVANA	gene	16342534	16353656	-	-2.54442	3.3768	-18.345	3.89009e-12	4.13429e-11	18.1945
ENSG00000197457.10	protein_coding	STMN3	2	OTTHUMG00000032985.3	chr20	HAVANA	gene	63639705	63657682	-	-1.36123	4.93875	-18.5624	3.24992e-12	3.54404e-11	18.1934
ENSG00000177889.10	protein_coding	UBE2N	1	OTTHUMG00000170156.5	chr12	HAVANA	gene	93405673	93441947	-	-0.872675	6.7892	-18.9257	2.41699e-12	2.74211e-11	18.1895
ENSG00000111196.10	protein_coding	MAGOHB	2	OTTHUMG00000168407.3	chr12	HAVANA	gene	10604193	10613609	-	-1.58302	4.72453	-18.5089	3.3965e-12	3.68417e-11	18.1892
ENSG00000075131.10	protein_coding	TIPIN	2	OTTHUMG00000133188.4	chr15	HAVANA	gene	66336191	66386746	-	-1.90122	3.72378	-18.3539	3.86138e-12	4.11183e-11	18.1882
ENSG00000145632.15	protein_coding	PLK2	2	OTTHUMG00000097047.3	chr5	HAVANA	gene	58453982	58460139	-	0.654872	8.26425	19.1725	1.98238e-12	2.31344e-11	18.188
ENSG00000146281.6	protein_coding	PM20D2	2	OTTHUMG00000015193.2	chr6	HAVANA	gene	89146055	89165565	+	-1.35814	5.26642	-18.6155	3.11142e-12	3.41126e-11	18.1839
ENSG00000197043.15	protein_coding	ANXA6	1	OTTHUMG00000164179.7	chr5	HAVANA	gene	151100706	151157815	-	1.2819	5.29798	18.5889	3.1799e-12	3.47932e-11	18.1698
ENSG00000062582.14	protein_coding	MRPS24	2	OTTHUMG00000023175.5	chr7	HAVANA	gene	43866558	43869893	-	2.04059	3.77804	18.3207	3.9694e-12	4.21035e-11	18.1679
ENSG00000126953.8	protein_coding	TIMM8A	2	OTTHUMG00000022028.6	chrX	HAVANA	gene	101345661	101348742	-	-1.69796	4.11486	-18.3775	3.78651e-12	4.04797e-11	18.1656
ENSG00000214944.10	protein_coding	ARHGEF28	1	OTTHUMG00000162454.3	chr5	HAVANA	gene	73626158	73941993	+	-0.764626	7.23574	-18.962	2.34712e-12	2.67028e-11	18.1542
ENSG00000159216.19	protein_coding	RUNX1	1	OTTHUMG00000086299.10	chr21	HAVANA	gene	34787801	36004667	-	-0.915467	6.56432	-18.8329	2.60565e-12	2.92159e-11	18.1453
ENSG00000119686.10	protein_coding	FLVCR2	1	OTTHUMG00000171487.5	chr14	HAVANA	gene	75578620	75663214	+	2.15386	3.35462	18.2863	4.08504e-12	4.31058e-11	18.1449
ENSG00000174840.9	protein_coding	PDE12	2	OTTHUMG00000158599.3	chr3	HAVANA	gene	57556274	57566848	+	-1.22259	5.99432	-18.7064	2.88832e-12	3.19026e-11	18.1348
ENSG00000114270.18	protein_coding	COL7A1	2	OTTHUMG00000133541.3	chr3	HAVANA	gene	48564073	48595329	-	1.38593	6.95153	18.8595	2.54999e-12	2.86706e-11	18.1298
ENSG00000105443.17	protein_coding	CYTH2	1	OTTHUMG00000150245.7	chr19	HAVANA	gene	48469208	48482314	+	1.29038	6.24658	18.7229	2.84966e-12	3.16256e-11	18.1246
ENSG00000139734.19	protein_coding	DIAPH3	2	OTTHUMG00000017004.7	chr13	HAVANA	gene	59665583	60163928	-	-1.41366	5.87423	-18.6591	3.00212e-12	3.30031e-11	18.1199
ENSG00000064703.13	protein_coding	DDX20	2	OTTHUMG00000011956.4	chr1	HAVANA	gene	111754832	111775602	+	-1.24751	5.38605	-18.5653	3.24229e-12	3.53985e-11	18.1177
ENSG00000132383.12	protein_coding	RPA1	1	OTTHUMG00000090579.4	chr17	HAVANA	gene	1829702	1900082	+	-0.940081	6.64029	-18.7996	2.67709e-12	2.99346e-11	18.1056
ENSG00000121057.13	protein_coding	AKAP1	2	OTTHUMG00000140369.6	chr17	HAVANA	gene	57085092	57121346	+	-1.07259	6.20117	-18.7083	2.88374e-12	3.18737e-11	18.0992
ENSG00000175550.8	protein_coding	DRAP1	2	OTTHUMG00000166723.5	chr11	HAVANA	gene	65919274	65921563	+	-0.731213	8.2809	-19.0672	2.15667e-12	2.49187e-11	18.0933
ENSG00000153558.17	protein_coding	FBXL2	2	OTTHUMG00000130745.8	chr3	HAVANA	gene	33277025	33403662	+	1.50999	4.22102	18.2912	4.06811e-12	4.29828e-11	18.0881
ENSG00000136270.14	protein_coding	TBRG4	1	OTTHUMG00000129247.8	chr7	HAVANA	gene	45100100	45112047	-	-0.846034	6.66463	-18.7771	2.72658e-12	3.04046e-11	18.0814
ENSG00000157557.13	protein_coding	ETS2	2	OTTHUMG00000090769.8	chr21	HAVANA	gene	38805183	38824955	+	0.723797	7.67537	18.9428	2.38377e-12	2.7082e-11	18.0792
ENSG00000129173.13	protein_coding	E2F8	1	OTTHUMG00000166102.5	chr11	HAVANA	gene	19224063	19241620	-	-1.98348	3.72106	-18.2122	4.34584e-12	4.55043e-11	18.0706
ENSG00000151491.14	protein_coding	EPS8	1	OTTHUMG00000168787.10	chr12	HAVANA	gene	15620134	15882329	-	-1.1162	5.64094	-18.5548	3.27028e-12	3.56386e-11	18.0619
ENSG00000175130.7	protein_coding	MARCKSL1	2	OTTHUMG00000007589.4	chr1	HAVANA	gene	32333839	32336233	-	0.843363	6.80426	18.7662	2.75071e-12	3.06527e-11	18.0593
ENSG00000170955.10	protein_coding	CAVIN3	1	OTTHUMG00000133378.4	chr11	HAVANA	gene	6318946	6320532	-	1.3667	4.81293	18.3476	3.8816e-12	4.12796e-11	18.0467
ENSG00000144895.12	protein_coding	EIF2A	1	OTTHUMG00000159775.4	chr3	HAVANA	gene	150546678	150586016	+	-0.747752	7.27529	-18.839	2.59281e-12	2.9132e-11	18.0438
ENSG00000108578.15	protein_coding	BLMH	2	OTTHUMG00000179756.6	chr17	HAVANA	gene	30248203	30292056	-	-1.03356	5.55305	-18.5126	3.38615e-12	3.67784e-11	18.0386
ENSG00000011009.11	protein_coding	LYPLA2	2	OTTHUMG00000002961.5	chr1	HAVANA	gene	23791145	23795539	+	0.818244	6.69182	18.7219	2.85188e-12	3.16287e-11	18.0382
ENSG00000177192.14	protein_coding	PUS1	1	OTTHUMG00000128507.8	chr12	HAVANA	gene	131929200	131945896	+	-1.48995	4.82395	-18.3522	3.86688e-12	4.115e-11	18.0359
ENSG00000115318.12	protein_coding	LOXL3	2	OTTHUMG00000129953.5	chr2	HAVANA	gene	74532258	74555690	-	-2.26232	3.0493	-18.1611	4.53583e-12	4.72207e-11	18.0322
ENSG00000172336.5	protein_coding	POP7	2	OTTHUMG00000044311.4	chr7	HAVANA	gene	100706121	100707486	+	-1.2969	4.91146	-18.3695	3.8118e-12	4.06701e-11	18.0308
ENSG00000020922.13	protein_coding	MRE11	2	OTTHUMG00000167780.6	chr11	HAVANA	gene	94415570	94493885	-	-1.38551	5.39797	-18.4591	3.5389e-12	3.81327e-11	18.0284
ENSG00000172965.17	lncRNA	MIR4435-2HG	2	OTTHUMG00000150313.58	chr2	HAVANA	gene	111006015	111523376	-	-1.67666	4.18666	-18.2257	4.2968e-12	4.50776e-11	18.0265
ENSG00000057757.10	protein_coding	PITHD1	2	OTTHUMG00000002960.4	chr1	HAVANA	gene	23778418	23788232	+	-1.18628	5.3718	-18.4527	3.5578e-12	3.8311e-11	18.0218
ENSG00000215105.4	processed_pseudogene	TTC3P1	1	OTTHUMG00000021869.1	chrX	HAVANA	gene	75740831	75746911	-	1.67797	3.92321	18.166	4.51723e-12	4.70571e-11	18.0188
ENSG00000138658.16	protein_coding	ZGRF1	2	OTTHUMG00000132908.4	chr4	HAVANA	gene	112539333	112636995	-	-2.45397	3.21155	-18.1336	4.64183e-12	4.82011e-11	18.0152
ENSG00000205476.9	protein_coding	CCDC85C	2	OTTHUMG00000171506.5	chr14	HAVANA	gene	99500190	99604207	-	-0.77655	7.82308	-18.8791	2.50989e-12	2.83174e-11	17.9994
ENSG00000205726.15	protein_coding	ITSN1	1	OTTHUMG00000065284.34	chr21	HAVANA	gene	33642400	33899861	+	1.05015	5.93358	18.525	3.35176e-12	3.64778e-11	17.9984
ENSG00000131238.18	protein_coding	PPT1	1	OTTHUMG00000004495.8	chr1	HAVANA	gene	40072710	40097260	-	-0.884713	6.83938	-18.702	2.89864e-12	3.1995e-11	17.9915
ENSG00000125871.14	protein_coding	MGME1	2	OTTHUMG00000031955.3	chr20	HAVANA	gene	17969018	17991122	+	-1.28489	4.82135	-18.3057	4.01951e-12	4.25244e-11	17.9905
ENSG00000198700.10	protein_coding	IPO9	2	OTTHUMG00000035805.2	chr1	HAVANA	gene	201829149	201884291	+	-0.798624	7.09929	-18.7413	2.80708e-12	3.11955e-11	17.9862
ENSG00000090006.18	protein_coding	LTBP4	2	OTTHUMG00000182635.12	chr19	HAVANA	gene	40592883	40629818	+	1.36455	4.70844	18.2531	4.19966e-12	4.42008e-11	17.9812
ENSG00000108784.10	protein_coding	NAGLU	1	OTTHUMG00000180240.3	chr17	HAVANA	gene	42536241	42544449	+	1.36978	5.03617	18.3125	3.99659e-12	4.23093e-11	17.9801
ENSG00000170412.18	protein_coding	GPRC5C	1	OTTHUMG00000067613.8	chr17	HAVANA	gene	74424851	74451653	+	2.02091	3.83919	18.0944	4.79756e-12	4.95971e-11	17.9736
ENSG00000170144.22	protein_coding	HNRNPA3	2	OTTHUMG00000132529.11	chr2	HAVANA	gene	177212694	177223959	+	-0.771388	8.00414	-18.8732	2.52187e-12	2.8433e-11	17.9684
ENSG00000129347.21	protein_coding	KRI1	2	OTTHUMG00000150343.9	chr19	HAVANA	gene	10553085	10566031	-	-1.09022	5.57808	-18.4116	3.68077e-12	3.95047e-11	17.9486
ENSG00000166166.13	protein_coding	TRMT61A	2	OTTHUMG00000171762.2	chr14	HAVANA	gene	103529196	103537073	+	-0.876531	6.37028	-18.5671	3.23749e-12	3.53758e-11	17.9474
ENSG00000156697.13	protein_coding	UTP14A	2	OTTHUMG00000022378.3	chrX	HAVANA	gene	129906121	129929761	+	-0.871751	6.69294	-18.6135	3.11653e-12	3.41457e-11	17.9373
ENSG00000138381.10	protein_coding	ASNSD1	2	OTTHUMG00000193522.2	chr2	HAVANA	gene	189661385	189670831	+	-1.7265	4.80594	-18.2227	4.30772e-12	4.51632e-11	17.9358
ENSG00000269713.9	protein_coding	NBPF9	2	OTTHUMG00000013845.9	chr1	HAVANA	gene	149052186	149103561	-	-1.79245	3.92995	-18.0786	4.86167e-12	5.01644e-11	17.9342
ENSG00000100216.6	protein_coding	TOMM22	2	OTTHUMG00000150991.3	chr22	HAVANA	gene	38681957	38685421	+	-0.992675	5.99638	-18.4708	3.50494e-12	3.78668e-11	17.9269
ENSG00000139496.18	protein_coding	NUP58	2	OTTHUMG00000016608.6	chr13	HAVANA	gene	25301524	25365390	+	-1.11093	6.30128	-18.5161	3.37638e-12	3.66968e-11	17.9188
ENSG00000049192.15	protein_coding	ADAMTS6	2	OTTHUMG00000074079.8	chr5	HAVANA	gene	65148738	65481920	-	-1.42629	4.39486	-18.1383	4.62358e-12	4.80423e-11	17.9161
ENSG00000198886.2	protein_coding	MT-ND4	3	NA	chrM	ENSEMBL	gene	10760	12137	+	0.704099	12.9331	19.6802	1.32823e-12	1.63922e-11	17.909
ENSG00000120253.14	protein_coding	NUP43	1	OTTHUMG00000015795.7	chr6	HAVANA	gene	149724315	149749665	-	-1.37133	4.83172	-18.2047	4.37313e-12	4.57313e-11	17.9041
ENSG00000152990.14	protein_coding	ADGRA3	1	OTTHUMG00000160926.13	chr4	HAVANA	gene	22345071	22516066	-	-1.12073	5.39116	-18.3159	3.98541e-12	4.22459e-11	17.8986
ENSG00000170545.17	protein_coding	SMAGP	2	OTTHUMG00000185196.3	chr12	HAVANA	gene	51244558	51270415	-	-1.15016	5.26564	-18.2885	4.07741e-12	4.30531e-11	17.8972
ENSG00000104408.11	protein_coding	EIF3E	1	OTTHUMG00000164858.7	chr8	HAVANA	gene	108162787	108443496	-	-0.735384	8.15412	-18.8137	2.64663e-12	2.96346e-11	17.8958
ENSG00000105323.18	protein_coding	HNRNPUL1	1	OTTHUMG00000182740.7	chr19	HAVANA	gene	41262496	41307787	+	-0.693891	8.81213	-18.924	2.42032e-12	2.74398e-11	17.8958
ENSG00000135956.9	protein_coding	TMEM127	1	OTTHUMG00000130454.4	chr2	HAVANA	gene	96248514	96265997	-	0.902386	6.28587	18.4785	3.48257e-12	3.76501e-11	17.8954
ENSG00000125166.13	protein_coding	GOT2	2	OTTHUMG00000133769.5	chr16	HAVANA	gene	58707131	58734342	-	-0.654953	8.00776	-18.7892	2.69969e-12	3.0151e-11	17.8954
ENSG00000179262.10	protein_coding	RAD23A	2	OTTHUMG00000180723.5	chr19	HAVANA	gene	12945855	12953642	+	-0.824849	7.43797	-18.6687	2.97864e-12	3.28075e-11	17.8751
ENSG00000011638.11	protein_coding	LDAF1	1	OTTHUMG00000131559.3	chr16	HAVANA	gene	21158377	21180616	+	1.54833	4.27482	18.0489	4.98503e-12	5.12105e-11	17.8742
ENSG00000137449.17	protein_coding	CPEB2	2	OTTHUMG00000090669.3	chr4	HAVANA	gene	15002481	15070153	+	2.4051	4.54258	18.0478	4.98949e-12	5.12239e-11	17.8731
ENSG00000115221.12	protein_coding	ITGB6	1	OTTHUMG00000132026.8	chr2	HAVANA	gene	160099667	160200313	-	3.02946	3.21664	17.9985	5.2017e-12	5.31682e-11	17.8722
ENSG00000101670.12	protein_coding	LIPG	1	OTTHUMG00000179658.5	chr18	HAVANA	gene	49560699	49599185	+	-1.75775	3.64578	-17.9723	5.31845e-12	5.41579e-11	17.8679
ENSG00000162413.17	protein_coding	KLHL21	1	OTTHUMG00000001437.3	chr1	HAVANA	gene	6590724	6614607	-	-1.01156	6.42756	-18.4795	3.47981e-12	3.76452e-11	17.865
ENSG00000131584.19	protein_coding	ACAP3	2	OTTHUMG00000002235.5	chr1	HAVANA	gene	1292390	1309609	-	1.33652	6.06007	18.367	3.81968e-12	4.07274e-11	17.8514
ENSG00000110172.12	protein_coding	CHORDC1	2	OTTHUMG00000167305.4	chr11	HAVANA	gene	90200429	90223077	-	-1.01601	6.09204	-18.3946	3.7332e-12	3.99884e-11	17.8457
ENSG00000111816.8	protein_coding	FRK	2	OTTHUMG00000015424.3	chr6	HAVANA	gene	115931149	116060891	-	2.75242	3.61266	17.9128	5.59405e-12	5.65756e-11	17.8346
ENSG00000113161.17	protein_coding	HMGCR	1	OTTHUMG00000102069.6	chr5	HAVANA	gene	75336329	75364001	+	0.788995	7.07981	18.5513	3.27987e-12	3.57193e-11	17.8318
ENSG00000244462.8	protein_coding	RBM12	2	OTTHUMG00000032350.5	chr20	HAVANA	gene	35648925	35664956	-	-0.910609	6.67839	-18.4855	3.46266e-12	3.75095e-11	17.8296
ENSG00000067334.14	protein_coding	DNTTIP2	2	OTTHUMG00000010268.7	chr1	HAVANA	gene	93866284	93879918	-	-0.923286	7.17428	-18.5647	3.2439e-12	3.53985e-11	17.8246
ENSG00000102996.5	protein_coding	MMP15	2	OTTHUMG00000133466.3	chr16	HAVANA	gene	58025754	58046901	+	1.27001	5.34842	18.1985	4.39593e-12	4.59403e-11	17.824
ENSG00000102312.24	protein_coding	PORCN	2	OTTHUMG00000024116.9	chrX	HAVANA	gene	48508959	48520814	+	0.848057	6.8	18.4827	3.47075e-12	3.75721e-11	17.8161
ENSG00000132768.14	protein_coding	DPH2	1	OTTHUMG00000008295.3	chr1	HAVANA	gene	43970000	43973369	+	-0.959082	6.11507	-18.3551	3.85761e-12	4.1105e-11	17.8064
ENSG00000141526.18	protein_coding	SLC16A3	1	OTTHUMG00000178832.2	chr17	HAVANA	gene	82217934	82261129	+	0.661415	8.25535	18.7183	2.86028e-12	3.16667e-11	17.8033
ENSG00000140443.15	protein_coding	IGF1R	1	OTTHUMG00000149851.10	chr15	HAVANA	gene	98648539	98964530	+	1.35428	5.13564	18.1267	4.66883e-12	4.84198e-11	17.8016
ENSG00000180801.14	protein_coding	ARSJ	2	OTTHUMG00000161067.4	chr4	HAVANA	gene	113900284	113979727	-	-1.62466	4.1524	-17.9603	5.37285e-12	5.46776e-11	17.8011
ENSG00000175602.4	protein_coding	CCDC85B	2	OTTHUMG00000166722.2	chr11	HAVANA	gene	65890673	65891635	+	1.08417	6.46066	18.3867	3.75754e-12	4.01964e-11	17.7929
ENSG00000177728.17	protein_coding	TMEM94	1	OTTHUMG00000179611.6	chr17	HAVANA	gene	75441159	75500452	+	0.932832	6.34842	18.371	3.80691e-12	4.06444e-11	17.7929
ENSG00000157514.18	protein_coding	TSC22D3	2	OTTHUMG00000022168.3	chrX	HAVANA	gene	107713221	107777342	-	2.49917	2.8896	17.9216	5.55207e-12	5.62557e-11	17.7904
ENSG00000136783.10	protein_coding	NIPSNAP3A	2	OTTHUMG00000020413.2	chr9	HAVANA	gene	104747683	104760120	+	1.71384	3.96549	17.8994	5.65788e-12	5.7009e-11	17.7874
ENSG00000150347.17	protein_coding	ARID5B	2	OTTHUMG00000018298.3	chr10	HAVANA	gene	61901684	62096944	+	2.27041	3.17428	17.8634	5.83405e-12	5.86029e-11	17.7833
ENSG00000138018.19	protein_coding	SELENOI	2	OTTHUMG00000151931.5	chr2	HAVANA	gene	26308547	26395885	+	-1.06944	6.21434	-18.3442	3.89269e-12	4.13437e-11	17.783
ENSG00000163347.6	protein_coding	CLDN1	2	OTTHUMG00000156214.3	chr3	HAVANA	gene	190305707	190322446	-	1.25155	7.28197	18.5164	3.3755e-12	3.66968e-11	17.7805
ENSG00000198121.15	protein_coding	LPAR1	2	OTTHUMG00000020486.3	chr9	HAVANA	gene	110873263	111038470	-	-1.06469	6.55538	-18.4027	3.70814e-12	3.97723e-11	17.7792
ENSG00000090013.11	protein_coding	BLVRB	1	OTTHUMG00000182593.4	chr19	HAVANA	gene	40447765	40465764	-	1.40243	4.75537	18.0262	5.08142e-12	5.21022e-11	17.7786
ENSG00000178209.17	protein_coding	PLEC	2	OTTHUMG00000165291.5	chr8	HAVANA	gene	143915153	143976734	-	0.828487	10.6678	19.0899	2.11777e-12	2.45039e-11	17.7665
ENSG00000178882.15	protein_coding	RFLNA	2	OTTHUMG00000168609.6	chr12	HAVANA	gene	123973241	124316024	+	0.907159	6.95301	18.4481	3.57144e-12	3.84325e-11	17.7638
ENSG00000117155.17	protein_coding	SSX2IP	2	OTTHUMG00000009926.6	chr1	HAVANA	gene	84643706	84690803	-	-1.5805	4.38707	-17.956	5.39245e-12	5.48429e-11	17.7635
ENSG00000135124.16	protein_coding	P2RX4	1	OTTHUMG00000169155.2	chr12	HAVANA	gene	121210065	121234106	+	1.8442	4.32096	17.9128	5.5939e-12	5.65756e-11	17.7622
ENSG00000115641.19	protein_coding	FHL2	2	OTTHUMG00000153120.6	chr2	HAVANA	gene	105357712	105438513	-	-1.03761	5.85063	-18.245	4.22831e-12	4.43981e-11	17.7561
ENSG00000205937.12	protein_coding	RNPS1	2	OTTHUMG00000128828.5	chr16	HAVANA	gene	2253116	2268397	-	-0.837363	6.80932	-18.4235	3.64468e-12	3.91689e-11	17.7551
ENSG00000198824.8	protein_coding	CHAMP1	2	OTTHUMG00000017404.9	chr13	HAVANA	gene	114314482	114337626	+	-0.997052	5.71777	-18.2173	4.32715e-12	4.53378e-11	17.7539
ENSG00000082898.19	protein_coding	XPO1	2	OTTHUMG00000152316.24	chr2	HAVANA	gene	61476032	61538741	-	-0.998525	8.32666	-18.6684	2.97931e-12	3.28075e-11	17.7485
ENSG00000198961.10	protein_coding	PJA2	2	OTTHUMG00000128750.3	chr5	HAVANA	gene	109334713	109409974	-	1.11319	6.80883	18.3937	3.73595e-12	3.99916e-11	17.7436
ENSG00000103064.15	protein_coding	SLC7A6	2	OTTHUMG00000176544.14	chr16	HAVANA	gene	68264516	68301823	+	-0.836985	7.01592	-18.444	3.58348e-12	3.85365e-11	17.7422
ENSG00000171488.15	protein_coding	LRRC8C	2	OTTHUMG00000010305.6	chr1	HAVANA	gene	89633072	89769903	+	-2.59891	3.502	-17.7991	6.16274e-12	6.14503e-11	17.7379
ENSG00000143409.18	protein_coding	MINDY1	2	OTTHUMG00000035061.7	chr1	HAVANA	gene	150996549	151008376	-	2.0877	3.55389	17.7993	6.16201e-12	6.14503e-11	17.7368
ENSG00000035928.17	protein_coding	RFC1	2	OTTHUMG00000099363.4	chr4	HAVANA	gene	39287456	39366375	-	-0.909366	6.68048	-18.3716	3.80502e-12	4.06444e-11	17.7304
ENSG00000162645.13	protein_coding	GBP2	2	OTTHUMG00000010662.5	chr1	HAVANA	gene	89106132	89150456	-	4.14137	2.69945	18.1962	4.40426e-12	4.59684e-11	17.7295
ENSG00000196083.11	protein_coding	IL1RAP	1	OTTHUMG00000156211.4	chr3	HAVANA	gene	190514051	190659750	+	1.50042	6.2071	18.2489	4.21454e-12	4.43288e-11	17.7292
ENSG00000264230.9	protein_coding	ANXA8L1	2	OTTHUMG00000018131.6	chr10	HAVANA	gene	46375627	46391784	+	3.22111	2.8948	17.9073	5.61998e-12	5.66971e-11	17.7251
ENSG00000198042.11	protein_coding	MAK16	2	OTTHUMG00000163957.5	chr8	HAVANA	gene	33485182	33501262	+	-1.35954	4.97814	-18.023	5.09524e-12	5.2211e-11	17.7212
ENSG00000101146.13	protein_coding	RAE1	2	OTTHUMG00000032819.5	chr20	HAVANA	gene	57351223	57379211	+	-0.90243	6.14599	-18.2623	4.16753e-12	4.39194e-11	17.7195
ENSG00000114867.22	protein_coding	EIF4G1	1	OTTHUMG00000156784.21	chr3	HAVANA	gene	184314495	184335358	+	-0.568327	10.3769	-18.9863	2.30171e-12	2.62594e-11	17.7184
ENSG00000125944.22	protein_coding	HNRNPR	2	OTTHUMG00000003224.6	chr1	HAVANA	gene	23303771	23344336	-	-0.915595	8.11295	-18.5961	3.16113e-12	3.46111e-11	17.716
ENSG00000198899.2	protein_coding	MT-ATP6	3	NA	chrM	ENSEMBL	gene	8527	9207	+	0.659465	11.1481	19.123	2.06246e-12	2.3966e-11	17.7155
ENSG00000117298.16	protein_coding	ECE1	1	OTTHUMG00000002625.6	chr1	HAVANA	gene	21217247	21345572	-	0.730334	7.48789	18.4693	3.5093e-12	3.78888e-11	17.6998
ENSG00000137168.8	protein_coding	PPIL1	2	OTTHUMG00000014612.2	chr6	HAVANA	gene	36854827	36874803	-	-0.987764	5.85623	-18.1817	4.45831e-12	4.64731e-11	17.6989
ENSG00000168461.13	protein_coding	RAB31	2	OTTHUMG00000178513.5	chr18	HAVANA	gene	9708275	9862551	+	1.63997	3.99646	17.8029	6.14315e-12	6.13676e-11	17.6982
ENSG00000205531.14	protein_coding	NAP1L4	2	OTTHUMG00000011009.12	chr11	HAVANA	gene	2944431	2992377	-	-0.765661	7.1258	-18.3978	3.72311e-12	3.99066e-11	17.6854
ENSG00000161013.17	protein_coding	MGAT4B	1	OTTHUMG00000130912.7	chr5	HAVANA	gene	179797597	179806952	-	0.64844	7.93346	18.5109	3.39092e-12	3.68057e-11	17.6703
ENSG00000101189.7	protein_coding	MRGBP	2	OTTHUMG00000032940.3	chr20	HAVANA	gene	62796473	62801729	+	-0.995383	5.59178	-18.0726	4.88641e-12	5.03241e-11	17.6487
ENSG00000108651.10	protein_coding	UTP6	1	OTTHUMG00000132815.5	chr17	HAVANA	gene	31860904	31901708	-	-0.957783	6.24573	-18.1976	4.39922e-12	4.59452e-11	17.6477
ENSG00000149485.19	protein_coding	FADS1	1	OTTHUMG00000157155.8	chr11	HAVANA	gene	61799627	61829318	-	-0.77103	6.9616	-18.3145	3.99012e-12	4.22683e-11	17.6368
ENSG00000184916.9	protein_coding	JAG2	2	OTTHUMG00000140172.3	chr14	HAVANA	gene	105140982	105168824	-	2.12821	3.31093	17.6794	6.82917e-12	6.73539e-11	17.6356
ENSG00000110237.5	protein_coding	ARHGEF17	2	OTTHUMG00000167971.4	chr11	HAVANA	gene	73308276	73369388	+	1.06866	6.53523	18.2088	4.35818e-12	4.56042e-11	17.625
ENSG00000107371.14	protein_coding	EXOSC3	2	OTTHUMG00000019932.4	chr9	HAVANA	gene	37759234	37832117	-	-1.34006	4.92773	-17.9036	5.63762e-12	5.68399e-11	17.624
ENSG00000204217.16	protein_coding	BMPR2	1	OTTHUMG00000133617.6	chr2	HAVANA	gene	202376327	202567751	+	1.20177	6.15075	18.1304	4.65439e-12	4.83007e-11	17.6239
ENSG00000100345.23	protein_coding	MYH9	1	OTTHUMG00000030429.9	chr22	HAVANA	gene	36281280	36388010	-	0.608125	10.5316	18.892	2.48369e-12	2.80997e-11	17.6171
ENSG00000145293.17	protein_coding	ENOPH1	2	OTTHUMG00000130295.5	chr4	HAVANA	gene	82430590	82461177	+	-1.17754	6.04612	-18.112	4.72689e-12	4.89597e-11	17.6102
ENSG00000181381.15	protein_coding	DDX60L	1	OTTHUMG00000161412.4	chr4	HAVANA	gene	168356735	168537786	-	0.97254	7.17325	18.2941	4.05852e-12	4.29093e-11	17.5973
ENSG00000165512.5	protein_coding	ZNF22	2	OTTHUMG00000018064.2	chr10	HAVANA	gene	45000923	45005326	+	-1.21253	4.85927	-17.8573	5.86424e-12	5.88699e-11	17.5912
ENSG00000177602.5	protein_coding	HASPIN	2	OTTHUMG00000090703.1	chr17	HAVANA	gene	3723903	3726699	+	-2.16866	3.66503	-17.6397	7.06629e-12	6.93152e-11	17.5875
ENSG00000164024.12	protein_coding	METAP1	1	OTTHUMG00000161231.3	chr4	HAVANA	gene	98995659	99062809	+	-0.787756	6.65031	-18.1938	4.41311e-12	4.60313e-11	17.5779
ENSG00000128973.13	protein_coding	CLN6	2	OTTHUMG00000133286.7	chr15	HAVANA	gene	68206992	68257211	-	-1.34599	4.59669	-17.7855	6.2352e-12	6.20968e-11	17.5746
ENSG00000073792.16	protein_coding	IGF2BP2	2	OTTHUMG00000074025.3	chr3	HAVANA	gene	185643130	185825042	-	-0.768995	7.15113	-18.2656	4.15592e-12	4.38254e-11	17.5662
ENSG00000169403.12	protein_coding	PTAFR	2	OTTHUMG00000003953.2	chr1	HAVANA	gene	28147166	28193936	-	3.09195	3.08863	17.6426	7.04881e-12	6.91917e-11	17.5579
ENSG00000225190.12	protein_coding	PLEKHM1	2	OTTHUMG00000179074.6	chr17	HAVANA	gene	45435900	45490758	-	0.959602	5.86457	18.0018	5.18757e-12	5.30904e-11	17.5509
ENSG00000077782.23	protein_coding	FGFR1	1	OTTHUMG00000147366.18	chr8	HAVANA	gene	38400215	38468834	-	0.972305	6.18097	18.0619	4.93077e-12	5.07169e-11	17.5507
ENSG00000126767.18	protein_coding	ELK1	2	OTTHUMG00000021452.4	chrX	HAVANA	gene	47635521	47650604	-	-0.884508	6.24256	-18.0812	4.85125e-12	5.01204e-11	17.5444
ENSG00000131467.12	protein_coding	PSME3	1	OTTHUMG00000180654.4	chr17	HAVANA	gene	42824385	42843760	+	-0.711658	8.55564	-18.4617	3.53145e-12	3.80776e-11	17.5343
ENSG00000177302.16	protein_coding	TOP3A	2	OTTHUMG00000059391.8	chr17	HAVANA	gene	18271428	18315007	-	-1.06736	5.4292	-17.9086	5.61375e-12	5.66922e-11	17.5338
ENSG00000113648.17	protein_coding	MACROH2A1	1	OTTHUMG00000129141.3	chr5	HAVANA	gene	135334381	135399914	-	-0.660093	8.27604	-18.412	3.67955e-12	3.95047e-11	17.5308
ENSG00000088899.16	protein_coding	LZTS3	2	OTTHUMG00000031735.3	chr20	HAVANA	gene	3162617	3173549	-	2.42752	3.26574	17.5618	7.55768e-12	7.38686e-11	17.5307
ENSG00000005486.17	protein_coding	RHBDD2	1	OTTHUMG00000156435.5	chr7	HAVANA	gene	75842602	75888926	+	0.96019	5.88432	17.9743	5.30961e-12	5.41355e-11	17.5232
ENSG00000126522.17	protein_coding	ASL	1	OTTHUMG00000022876.13	chr7	HAVANA	gene	66075800	66094697	+	1.09976	5.18789	17.8313	5.9957e-12	6.00417e-11	17.5229
ENSG00000106484.16	protein_coding	MEST	1	OTTHUMG00000156661.29	chr7	HAVANA	gene	130486171	130506465	+	-1.20296	5.0364	-17.81	6.10592e-12	6.10704e-11	17.5188
ENSG00000123545.6	protein_coding	NDUFAF4	2	OTTHUMG00000015246.2	chr6	HAVANA	gene	96889315	96897891	-	-1.8516	3.51714	-17.5419	7.68949e-12	7.48067e-11	17.5064
ENSG00000117305.15	protein_coding	HMGCL	1	OTTHUMG00000002963.5	chr1	HAVANA	gene	23801885	23838620	-	1.41275	4.41189	17.6477	7.01795e-12	6.9007e-11	17.4996
ENSG00000145012.15	protein_coding	LPP	1	OTTHUMG00000156387.5	chr3	HAVANA	gene	188153284	188890671	+	1.38749	6.26337	18.0005	5.19287e-12	5.31113e-11	17.4971
ENSG00000181284.3	protein_coding	TMEM102	2	OTTHUMG00000132901.2	chr17	HAVANA	gene	7435435	7437679	+	1.68659	3.9254	17.5543	7.60707e-12	7.42178e-11	17.4896
ENSG00000155366.17	protein_coding	RHOC	1	OTTHUMG00000011905.6	chr1	HAVANA	gene	112701127	112707434	-	0.713703	7.66682	18.2447	4.2293e-12	4.43981e-11	17.4772
ENSG00000101346.15	protein_coding	POFUT1	2	OTTHUMG00000133268.3	chr20	HAVANA	gene	32207855	32238658	+	-0.775396	7.08744	-18.1453	4.59632e-12	4.78199e-11	17.4698
ENSG00000172493.23	protein_coding	AFF1	2	OTTHUMG00000130603.9	chr4	HAVANA	gene	86935002	87141039	+	1.02263	6.43948	18.0161	5.12522e-12	5.24852e-11	17.4693
ENSG00000171298.14	protein_coding	GAA	2	OTTHUMG00000177537.3	chr17	HAVANA	gene	80101533	80119881	+	1.04609	6.84899	18.0739	4.88109e-12	5.03012e-11	17.4553
ENSG00000133706.20	protein_coding	LARS1	2	OTTHUMG00000163429.8	chr5	HAVANA	gene	146110566	146182696	-	-0.902017	6.78334	-18.0699	4.89738e-12	5.04053e-11	17.4498
ENSG00000204392.11	protein_coding	LSM2	2	OTTHUMG00000031121.3	chr6	HAVANA	gene	31797396	31806966	-	-1.33898	5.02856	-17.7246	6.56921e-12	6.51843e-11	17.4483
ENSG00000113356.13	protein_coding	POLR3G	1	OTTHUMG00000162809.6	chr5	HAVANA	gene	90471748	90514557	+	-2.29699	3.82045	-17.477	8.13438e-12	7.87032e-11	17.4364
ENSG00000173083.16	protein_coding	HPSE	1	OTTHUMG00000130425.6	chr4	HAVANA	gene	83292461	83335153	-	1.07114	5.31275	17.7575	6.38612e-12	6.35222e-11	17.4344
ENSG00000079691.19	protein_coding	CARMIL1	1	OTTHUMG00000014393.6	chr6	HAVANA	gene	25279078	25620530	+	0.995037	5.70908	17.8389	5.95729e-12	5.96937e-11	17.4342
ENSG00000120942.14	protein_coding	UBIAD1	2	OTTHUMG00000002075.2	chr1	HAVANA	gene	11273198	11296049	+	-1.27913	5.17478	-17.7385	6.4911e-12	6.44485e-11	17.4333
ENSG00000196684.12	protein_coding	HSH2D	2	OTTHUMG00000182256.5	chr19	HAVANA	gene	16134028	16158575	+	1.63989	3.99076	17.4911	8.03547e-12	7.78849e-11	17.4254
ENSG00000071626.17	protein_coding	DAZAP1	1	OTTHUMG00000180058.9	chr19	HAVANA	gene	1407569	1435687	+	-0.725001	7.26713	-18.1197	4.69654e-12	4.86762e-11	17.4205
ENSG00000154719.14	protein_coding	MRPL39	2	OTTHUMG00000078371.4	chr21	HAVANA	gene	25585656	25607517	-	-1.08118	5.19594	-17.7222	6.58231e-12	6.52349e-11	17.4095
ENSG00000120699.14	protein_coding	EXOSC8	2	OTTHUMG00000016742.5	chr13	HAVANA	gene	36998816	37025881	+	-1.91601	4.43704	-17.5487	7.64416e-12	7.45351e-11	17.4092
ENSG00000130517.14	protein_coding	PGPEP1	1	OTTHUMG00000183358.8	chr19	HAVANA	gene	18340598	18369950	+	1.26533	4.79652	17.6175	7.20274e-12	7.05686e-11	17.406
ENSG00000185745.10	protein_coding	IFIT1	2	OTTHUMG00000018712.2	chr10	HAVANA	gene	89392546	89406487	+	1.94821	3.76341	17.4331	8.4512e-12	8.14302e-11	17.4057
ENSG00000284024.4	protein_coding	MSANTD7	2	OTTHUMG00000017712.5	chr10	HAVANA	gene	14838302	14846999	+	-1.39963	4.43702	-17.5553	7.60069e-12	7.42001e-11	17.397
ENSG00000121579.14	protein_coding	NAA50	2	OTTHUMG00000159294.4	chr3	HAVANA	gene	113716458	113746300	-	-1.25358	8.31051	-18.2464	4.22331e-12	4.43924e-11	17.3861
ENSG00000137692.12	protein_coding	DCUN1D5	1	OTTHUMG00000165822.4	chr11	HAVANA	gene	103050686	103092194	-	-0.815335	6.39841	-17.9206	5.55682e-12	5.62689e-11	17.3759
ENSG00000129219.14	protein_coding	PLD2	1	OTTHUMG00000090779.7	chr17	HAVANA	gene	4807152	4823434	+	1.27472	5.2426	17.6618	6.93337e-12	6.82577e-11	17.3685
ENSG00000110080.20	protein_coding	ST3GAL4	1	OTTHUMG00000165830.4	chr11	HAVANA	gene	126355640	126440344	+	1.10776	5.4832	17.7007	6.70516e-12	6.6251e-11	17.3549
ENSG00000164164.17	protein_coding	OTUD4	2	OTTHUMG00000161480.8	chr4	HAVANA	gene	145110838	145180589	-	-1.09727	6.50728	-17.9097	5.60862e-12	5.66877e-11	17.3537
ENSG00000130695.16	protein_coding	CEP85	2	OTTHUMG00000003380.6	chr1	HAVANA	gene	26234200	26278808	+	-1.35751	5.20516	-17.6485	7.01312e-12	6.90012e-11	17.3497
ENSG00000143418.20	protein_coding	CERS2	1	OTTHUMG00000035064.8	chr1	HAVANA	gene	150960583	150975003	-	-0.715853	7.53757	-18.0795	4.8579e-12	5.01573e-11	17.3455
ENSG00000161091.15	protein_coding	MFSD12	2	OTTHUMG00000180766.6	chr19	HAVANA	gene	3538261	3574290	-	0.803341	6.7977	17.9468	5.43495e-12	5.51778e-11	17.3449
ENSG00000138385.16	protein_coding	SSB	1	OTTHUMG00000132212.11	chr2	HAVANA	gene	169791933	169812064	+	-0.793201	6.96344	-17.9731	5.31475e-12	5.4154e-11	17.3357
ENSG00000120334.16	protein_coding	CENPL	2	OTTHUMG00000034802.1	chr1	HAVANA	gene	173799550	173824883	-	-1.72149	4.00649	-17.4049	8.66148e-12	8.32595e-11	17.3346
ENSG00000131100.13	protein_coding	ATP6V1E1	2	OTTHUMG00000059320.6	chr22	HAVANA	gene	17592136	17628749	-	0.834364	6.58635	17.896	5.67452e-12	5.71413e-11	17.3336
ENSG00000254986.8	protein_coding	DPP3	1	OTTHUMG00000167143.6	chr11	HAVANA	gene	66480013	66509657	+	0.767264	6.87894	17.9431	5.45205e-12	5.52766e-11	17.3282
ENSG00000124279.12	protein_coding	FASTKD3	2	OTTHUMG00000131029.5	chr5	HAVANA	gene	7859159	7869037	-	-1.32607	4.35648	-17.4581	8.26904e-12	7.97693e-11	17.3208
ENSG00000144746.7	protein_coding	ARL6IP5	2	OTTHUMG00000158773.2	chr3	HAVANA	gene	69084937	69106092	+	1.40535	5.39492	17.6295	7.1286e-12	6.98843e-11	17.3184
ENSG00000124486.15	protein_coding	USP9X	2	OTTHUMG00000021367.5	chrX	HAVANA	gene	41085445	41236579	+	0.714022	8.3081	18.143	4.6054e-12	4.78838e-11	17.2945
ENSG00000197785.14	protein_coding	ATAD3A	2	OTTHUMG00000000575.7	chr1	HAVANA	gene	1512162	1534685	+	-1.05729	5.85964	-17.7224	6.58146e-12	6.52349e-11	17.2927
ENSG00000198752.11	protein_coding	CDC42BPB	1	OTTHUMG00000171898.5	chr14	HAVANA	gene	102932380	103057549	-	0.68941	8.04471	18.0979	4.78354e-12	4.95028e-11	17.2924
ENSG00000186205.14	protein_coding	MTARC1	2	OTTHUMG00000037353.6	chr1	HAVANA	gene	220786352	220819659	+	-3.14108	2.40031	-17.4589	8.26342e-12	7.97623e-11	17.2839
ENSG00000168389.18	protein_coding	MFSD2A	2	OTTHUMG00000009293.2	chr1	HAVANA	gene	39955112	39969968	+	-1.8988	3.41894	-17.2804	9.65818e-12	9.17049e-11	17.2836
ENSG00000275023.5	protein_coding	MLLT6	2	OTTHUMG00000188498.2	chr17	HAVANA	gene	38705273	38729795	+	0.905135	7.25363	17.9535	5.40391e-12	5.49252e-11	17.2832
ENSG00000275700.6	protein_coding	AATF	2	OTTHUMG00000188458.3	chr17	HAVANA	gene	36948925	37056871	+	-0.75582	7.36027	-17.9782	5.29217e-12	5.39914e-11	17.2816
ENSG00000103490.14	protein_coding	PYCARD	2	OTTHUMG00000176753.33	chr16	HAVANA	gene	31201486	31203450	-	1.6896	3.93853	17.3124	9.39128e-12	8.95881e-11	17.2741
ENSG00000204469.13	protein_coding	PRRC2A	2	OTTHUMG00000031168.3	chr6	HAVANA	gene	31620715	31637771	+	-0.645342	9.15234	-18.2563	4.18848e-12	4.41116e-11	17.2684
ENSG00000070770.10	protein_coding	CSNK2A2	2	OTTHUMG00000133488.5	chr16	HAVANA	gene	58157907	58198106	-	-0.68271	7.5365	-17.984	5.26602e-12	5.37583e-11	17.2606
ENSG00000116117.20	protein_coding	PARD3B	1	OTTHUMG00000154562.5	chr2	HAVANA	gene	204545475	205620162	+	1.83254	3.92727	17.2896	9.58098e-12	9.11311e-11	17.2596
ENSG00000101160.15	protein_coding	CTSZ	2	OTTHUMG00000032858.3	chr20	HAVANA	gene	58985686	59008238	-	0.695541	8.15719	18.0765	4.87015e-12	5.02201e-11	17.2572
ENSG00000120948.19	protein_coding	TARDBP	2	OTTHUMG00000185649.2	chr1	HAVANA	gene	11012344	11030528	+	-0.719884	7.59771	-17.9879	5.24868e-12	5.36148e-11	17.2554
ENSG00000134748.13	protein_coding	PRPF38A	2	OTTHUMG00000008199.3	chr1	HAVANA	gene	52404602	52420836	+	-0.925275	5.83036	-17.6721	6.87225e-12	6.77378e-11	17.2498
ENSG00000186638.17	protein_coding	KIF24	2	OTTHUMG00000019810.6	chr9	HAVANA	gene	34252380	34329268	-	-1.69447	4.04357	-17.3153	9.36757e-12	8.94142e-11	17.249
ENSG00000136059.16	protein_coding	VILL	2	OTTHUMG00000130814.8	chr3	HAVANA	gene	37988059	38007188	+	2.53375	3.32363	17.2317	1.00809e-11	9.51647e-11	17.2474
ENSG00000014138.10	protein_coding	POLA2	1	OTTHUMG00000193339.2	chr11	HAVANA	gene	65261913	65305959	+	-1.8081	3.60486	-17.2484	9.93387e-12	9.39941e-11	17.2406
ENSG00000100479.14	protein_coding	POLE2	2	OTTHUMG00000170813.3	chr14	HAVANA	gene	49643555	49688422	-	-2.53874	2.82525	-17.2378	1.00269e-11	9.48195e-11	17.2303
ENSG00000187091.14	protein_coding	PLCD1	1	OTTHUMG00000130813.6	chr3	HAVANA	gene	38007496	38029642	-	2.92353	2.50246	17.3847	8.81584e-12	8.45842e-11	17.2264
ENSG00000149743.14	protein_coding	TRPT1	2	OTTHUMG00000167844.7	chr11	HAVANA	gene	64223799	64226254	-	1.29926	4.92018	17.4313	8.46437e-12	8.1509e-11	17.2193
ENSG00000132661.4	protein_coding	NXT1	2	OTTHUMG00000032059.3	chr20	HAVANA	gene	23350791	23354771	+	-1.42974	4.32763	-17.3325	9.2268e-12	8.81738e-11	17.2153
ENSG00000156675.16	protein_coding	RAB11FIP1	2	OTTHUMG00000164026.4	chr8	HAVANA	gene	37858618	37899497	-	0.964302	6.60751	17.7599	6.37313e-12	6.34317e-11	17.2115
ENSG00000114626.18	protein_coding	ABTB1	2	OTTHUMG00000159636.2	chr3	HAVANA	gene	127672935	127680926	+	1.74806	4.01833	17.236	1.00422e-11	9.49094e-11	17.1988
ENSG00000157193.18	protein_coding	LRP8	1	OTTHUMG00000008924.46	chr1	HAVANA	gene	53242364	53328469	-	-1.2165	5.31198	-17.4997	7.97571e-12	7.73976e-11	17.1924
ENSG00000090060.19	protein_coding	PAPOLA	1	OTTHUMG00000171441.5	chr14	HAVANA	gene	96501433	96567116	+	-0.813516	8.74138	-18.0974	4.7854e-12	4.95028e-11	17.1879
ENSG00000086475.15	protein_coding	SEPHS1	2	OTTHUMG00000017696.4	chr10	HAVANA	gene	13317428	13348298	-	-0.943046	5.76081	-17.5726	7.48765e-12	7.3272e-11	17.1726
ENSG00000136518.17	protein_coding	ACTL6A	2	OTTHUMG00000157782.9	chr3	HAVANA	gene	179562886	179588407	+	-0.902396	6.52029	-17.7094	6.655e-12	6.58752e-11	17.1688
ENSG00000139197.11	protein_coding	PEX5	2	OTTHUMG00000168175.5	chr12	HAVANA	gene	7188685	7218574	+	-0.926685	5.80191	-17.5705	7.5011e-12	7.33595e-11	17.1631
ENSG00000047634.15	protein_coding	SCML1	2	OTTHUMG00000021206.8	chrX	HAVANA	gene	17737449	17754988	+	-2.0309	3.5896	-17.1486	1.08474e-11	1.0146e-10	17.1579
ENSG00000203760.9	protein_coding	CENPW	2	OTTHUMG00000015518.1	chr6	HAVANA	gene	126340115	126348875	+	-1.85308	3.38885	-17.1339	1.09891e-11	1.02609e-10	17.1549
ENSG00000077684.16	protein_coding	JADE1	2	OTTHUMG00000161176.7	chr4	HAVANA	gene	128809700	128875224	+	1.17612	5.66938	17.5103	7.90258e-12	7.67794e-11	17.1527
ENSG00000275074.2	protein_coding	NUDT18	2	OTTHUMG00000163774.6	chr8	HAVANA	gene	22106874	22109419	-	2.71317	3.24484	17.1198	1.11274e-11	1.03604e-10	17.1438
ENSG00000162139.10	protein_coding	NEU3	1	OTTHUMG00000165518.3	chr11	HAVANA	gene	74988279	75018893	+	-0.916159	5.85378	-17.5571	7.58843e-12	7.41248e-11	17.142
ENSG00000148296.7	protein_coding	SURF6	2	OTTHUMG00000020871.4	chr9	HAVANA	gene	133328776	133336188	-	-1.03981	5.51038	-17.4837	8.08718e-12	7.82929e-11	17.1382
ENSG00000116209.12	protein_coding	TMEM59	2	OTTHUMG00000008437.7	chr1	HAVANA	gene	54026681	54053504	-	0.849301	7.0149	17.7519	6.41714e-12	6.37918e-11	17.1377
ENSG00000088387.22	protein_coding	DOCK9	2	OTTHUMG00000017260.8	chr13	HAVANA	gene	98793429	99086625	-	-1.10743	5.82944	-17.5417	7.69037e-12	7.48067e-11	17.1362
ENSG00000102178.13	protein_coding	UBL4A	2	OTTHUMG00000013370.6	chrX	HAVANA	gene	154483717	154486615	-	-0.765219	7.23789	-17.7887	6.21812e-12	6.19645e-11	17.13
ENSG00000135913.11	protein_coding	USP37	1	OTTHUMG00000133113.5	chr2	HAVANA	gene	218450251	218568351	-	-1.16582	4.91346	-17.353	9.06301e-12	8.67102e-11	17.1291
ENSG00000167930.17	protein_coding	FAM234A	1	OTTHUMG00000060728.19	chr16	HAVANA	gene	234521	272183	+	1.01767	5.66169	17.4887	8.05245e-12	7.8003e-11	17.1288
ENSG00000175482.9	protein_coding	POLD4	1	OTTHUMG00000167135.5	chr11	HAVANA	gene	67350772	67356972	-	2.29484	3.00085	17.1048	1.12756e-11	1.04745e-10	17.1256
ENSG00000133985.3	protein_coding	TTC9	2	OTTHUMG00000172133.2	chr14	HAVANA	gene	70641916	70675366	+	3.62469	2.09654	17.6428	7.04722e-12	6.91917e-11	17.1199
ENSG00000123989.15	protein_coding	CHPF	2	OTTHUMG00000058929.4	chr2	HAVANA	gene	219538954	219543809	-	0.721497	7.47452	17.808	6.11641e-12	6.11378e-11	17.1173
ENSG00000105856.14	protein_coding	HBP1	2	OTTHUMG00000157642.5	chr7	HAVANA	gene	107168961	107202522	+	1.33815	4.63751	17.2593	9.83858e-12	9.32007e-11	17.1126
ENSG00000105676.14	protein_coding	ARMC6	1	OTTHUMG00000169271.6	chr19	HAVANA	gene	19033575	19060311	+	-0.847105	6.5358	-17.6425	7.04946e-12	6.91917e-11	17.1051
ENSG00000165046.13	protein_coding	LETM2	2	OTTHUMG00000165059.6	chr8	HAVANA	gene	38386207	38409527	+	-1.53462	4.04985	-17.1558	1.07785e-11	1.00932e-10	17.0998
ENSG00000177119.17	protein_coding	ANO6	2	OTTHUMG00000169564.2	chr12	HAVANA	gene	45215987	45482280	+	0.788995	7.20583	17.7413	6.47575e-12	6.43353e-11	17.0981
ENSG00000073464.13	protein_coding	CLCN4	2	OTTHUMG00000021125.3	chrX	HAVANA	gene	10156975	10237660	+	-1.71084	3.91356	-17.1267	1.10592e-11	1.03124e-10	17.0968
ENSG00000197183.15	protein_coding	NOL4L	2	OTTHUMG00000032219.4	chr20	HAVANA	gene	32443059	32585333	-	2.05618	3.26599	17.053	1.18067e-11	1.09242e-10	17.0924
ENSG00000129636.13	protein_coding	ITFG1	1	OTTHUMG00000133103.6	chr16	HAVANA	gene	47154387	47464149	-	1.00266	5.51446	17.4171	8.56948e-12	8.24237e-11	17.0896
ENSG00000149596.7	protein_coding	JPH2	2	OTTHUMG00000033037.3	chr20	HAVANA	gene	44106590	44187188	-	2.90083	2.56238	17.1859	1.04959e-11	9.86823e-11	17.0819
ENSG00000164744.14	protein_coding	SUN3	2	OTTHUMG00000155646.3	chr7	HAVANA	gene	47987148	48029119	-	2.30088	3.05247	17.0478	1.18607e-11	1.09679e-10	17.079
ENSG00000130024.15	protein_coding	PHF10	2	OTTHUMG00000016058.4	chr6	HAVANA	gene	169703902	169725566	-	-1.52163	4.64103	-17.2326	1.00729e-11	9.51437e-11	17.0774
ENSG00000132953.18	protein_coding	XPO4	2	OTTHUMG00000016528.2	chr13	HAVANA	gene	20777329	20903048	-	-1.22628	5.33105	-17.3751	8.88995e-12	8.52045e-11	17.0762
ENSG00000274180.1	protein_coding	NATD1	2	OTTHUMG00000130764.7	chr17	HAVANA	gene	21238870	21253410	-	2.11335	3.56873	17.0349	1.19977e-11	1.10758e-10	17.0684
ENSG00000170315.14	protein_coding	UBB	1	OTTHUMG00000058987.7	chr17	HAVANA	gene	16380798	16382745	+	-0.583303	8.62649	-17.9459	5.43892e-12	5.51778e-11	17.0681
ENSG00000090339.9	protein_coding	ICAM1	2	OTTHUMG00000180403.3	chr19	HAVANA	gene	10271093	10286615	+	0.618755	8.6583	17.9462	5.43747e-12	5.51778e-11	17.0678
ENSG00000182944.18	protein_coding	EWSR1	1	OTTHUMG00000151107.9	chr22	HAVANA	gene	29268009	29300525	+	-0.649571	7.89388	-17.8258	6.02408e-12	6.02889e-11	17.0668
ENSG00000151466.12	protein_coding	SCLT1	1	OTTHUMG00000133346.7	chr4	HAVANA	gene	128864921	129093600	-	-1.47087	3.99287	-17.1113	1.12118e-11	1.0427e-10	17.0653
ENSG00000166887.16	protein_coding	VPS39	2	OTTHUMG00000130467.4	chr15	HAVANA	gene	42158701	42208307	-	0.946964	6.04804	17.4951	8.00786e-12	7.76634e-11	17.065
ENSG00000111696.12	protein_coding	NT5DC3	2	OTTHUMG00000157017.3	chr12	HAVANA	gene	103770453	103841234	-	-1.65291	3.71685	-17.0632	1.16996e-11	1.08497e-10	17.0602
ENSG00000234745.14	protein_coding	HLA-B	2	OTTHUMG00000031153.7	chr6	HAVANA	gene	31353872	31367067	-	0.683511	7.84224	17.8013	6.15155e-12	6.14138e-11	17.0569
ENSG00000167553.17	protein_coding	TUBA1C	2	OTTHUMG00000169497.4	chr12	HAVANA	gene	49188736	49274600	+	-0.576186	9.31446	-18.0387	5.02815e-12	5.15884e-11	17.0519
ENSG00000168066.22	protein_coding	SF1	1	OTTHUMG00000066833.14	chr11	HAVANA	gene	64764606	64778786	-	-0.590861	8.38987	-17.8781	5.76133e-12	5.79796e-11	17.0416
ENSG00000116221.15	protein_coding	MRPL37	1	OTTHUMG00000008118.6	chr1	HAVANA	gene	54184041	54225464	+	-0.775546	7.2864	-17.6932	6.74831e-12	6.66327e-11	17.037
ENSG00000105287.13	protein_coding	PRKD2	1	OTTHUMG00000183431.4	chr19	HAVANA	gene	46674275	46717127	-	0.933182	5.96833	17.445	8.36384e-12	8.06361e-11	17.0328
ENSG00000089048.15	protein_coding	ESF1	2	OTTHUMG00000031906.1	chr20	HAVANA	gene	13714322	13784919	-	-1.34153	5.00297	-17.2518	9.90386e-12	9.37646e-11	17.0265
ENSG00000002587.10	protein_coding	HS3ST1	2	OTTHUMG00000090547.7	chr4	HAVANA	gene	11393150	11429564	-	-1.30493	4.53671	-17.163	1.07105e-11	1.0041e-10	17.0245
ENSG00000140350.15	protein_coding	ANP32A	1	OTTHUMG00000154502.2	chr15	HAVANA	gene	68778535	68820897	-	-0.848848	6.47779	-17.5431	7.68128e-12	7.48067e-11	17.0243
ENSG00000060971.19	protein_coding	ACAA1	2	OTTHUMG00000131087.7	chr3	HAVANA	gene	38103129	38137242	-	1.01626	6.13575	17.4614	8.2454e-12	7.96355e-11	17.0217
ENSG00000083312.19	protein_coding	TNPO1	2	OTTHUMG00000100967.7	chr5	HAVANA	gene	72816312	72916733	+	-0.90801	8.47814	-17.855	5.87601e-12	5.89517e-11	17.0101
ENSG00000112851.16	protein_coding	ERBIN	1	OTTHUMG00000097808.3	chr5	HAVANA	gene	65883128	66082546	+	0.763146	8.48777	17.8456	5.92306e-12	5.93872e-11	17.0039
ENSG00000151304.6	protein_coding	SRFBP1	2	OTTHUMG00000162970.2	chr5	HAVANA	gene	121961975	122075570	+	-1.20532	4.69452	-17.1713	1.06317e-11	9.97866e-11	17.0028
ENSG00000133401.16	protein_coding	PDZD2	2	OTTHUMG00000161981.7	chr5	HAVANA	gene	31639131	32110932	+	1.10477	5.8041	17.3621	8.99142e-12	8.60758e-11	16.9917
ENSG00000184988.8	protein_coding	TMEM106A	2	OTTHUMG00000180879.4	chr17	HAVANA	gene	43211835	43220041	+	1.40889	4.25194	17.044	1.19013e-11	1.09993e-10	16.9802
ENSG00000110628.16	protein_coding	SLC22A18	2	OTTHUMG00000010037.13	chr11	HAVANA	gene	2899721	2925246	+	3.50156	2.29935	17.2797	9.66432e-12	9.17098e-11	16.9735
ENSG00000188846.14	protein_coding	RPL14	2	OTTHUMG00000156046.7	chr3	HAVANA	gene	40457292	40468587	+	-0.53998	9.10443	-17.9082	5.61602e-12	5.66922e-11	16.9654
ENSG00000080823.23	protein_coding	MOK	1	OTTHUMG00000164896.9	chr14	HAVANA	gene	102224500	102305190	-	-1.35532	5.43506	-17.2687	9.75791e-12	9.24903e-11	16.9642
ENSG00000011114.15	protein_coding	BTBD7	2	OTTHUMG00000171269.3	chr14	HAVANA	gene	93237550	93333092	-	-0.811484	7.22207	-17.5937	7.35236e-12	7.19913e-11	16.9565
ENSG00000163430.13	protein_coding	FSTL1	2	OTTHUMG00000159440.3	chr3	HAVANA	gene	120392293	120451016	-	0.634068	7.96799	17.7106	6.64806e-12	6.58465e-11	16.9562
ENSG00000100519.12	protein_coding	PSMC6	2	OTTHUMG00000152333.9	chr14	HAVANA	gene	52707178	52728590	+	-0.693733	7.70879	-17.6637	6.92178e-12	6.81848e-11	16.9478
ENSG00000166483.12	protein_coding	WEE1	1	OTTHUMG00000165863.4	chr11	HAVANA	gene	9573670	9593457	+	-1.2385	4.84527	-17.138	1.09497e-11	1.02359e-10	16.9468
ENSG00000168883.20	protein_coding	USP39	1	OTTHUMG00000153090.11	chr2	HAVANA	gene	85602856	85649283	+	-0.955884	6.10384	-17.3882	8.78865e-12	8.43824e-11	16.9464
ENSG00000196449.4	protein_coding	YRDC	2	OTTHUMG00000004318.2	chr1	HAVANA	gene	37802945	37808208	-	-1.04553	5.33232	-17.2231	1.01571e-11	9.58286e-11	16.9326
ENSG00000197081.16	protein_coding	IGF2R	2	OTTHUMG00000015945.4	chr6	HAVANA	gene	159969082	160113507	+	0.853529	8.17345	17.6926	6.75196e-12	6.66327e-11	16.9128
ENSG00000156453.14	protein_coding	PCDH1	1	OTTHUMG00000129661.6	chr5	HAVANA	gene	141853090	141879246	-	2.54645	3.05943	16.8568	1.4068e-11	1.27064e-10	16.9056
ENSG00000119138.5	protein_coding	KLF9	2	OTTHUMG00000019991.2	chr9	HAVANA	gene	70384604	70414657	-	2.5436	3.37066	16.8347	1.4349e-11	1.29244e-10	16.8986
ENSG00000186660.15	protein_coding	ZFP91	2	OTTHUMG00000137391.5	chr11	HAVANA	gene	58579063	58621550	+	-0.897646	7.2109	-17.5268	7.79062e-12	7.57367e-11	16.8981
ENSG00000066455.13	protein_coding	GOLGA5	2	OTTHUMG00000171217.2	chr14	HAVANA	gene	92794305	92839947	+	0.843122	6.61471	17.4181	8.56252e-12	8.24054e-11	16.8977
ENSG00000197892.13	protein_coding	KIF13B	2	OTTHUMG00000164032.2	chr8	HAVANA	gene	29067278	29263124	-	1.1438	5.12791	17.1242	1.10839e-11	1.03257e-10	16.8963
ENSG00000149313.11	protein_coding	AASDHPPT	2	OTTHUMG00000166253.3	chr11	HAVANA	gene	106075501	106098699	+	-1.09247	5.95017	-17.3002	9.49175e-12	9.04407e-11	16.895
ENSG00000131876.18	protein_coding	SNRPA1	2	OTTHUMG00000149871.4	chr15	HAVANA	gene	101281510	101295282	-	-1.28793	5.04509	-17.117	1.11545e-11	1.03796e-10	16.8936
ENSG00000144043.13	protein_coding	TEX261	2	OTTHUMG00000170601.2	chr2	HAVANA	gene	70968325	70994873	-	-0.752826	7.11814	-17.5012	7.96519e-12	7.73415e-11	16.8873
ENSG00000133131.15	protein_coding	MORC4	2	OTTHUMG00000022155.5	chrX	HAVANA	gene	106813871	107000212	-	-1.46413	4.40939	-16.9843	1.25508e-11	1.14823e-10	16.8866
ENSG00000171428.15	protein_coding	NAT1	2	OTTHUMG00000097001.6	chr8	HAVANA	gene	18170477	18223689	+	1.64144	4.53812	16.9751	1.26542e-11	1.15705e-10	16.8829
ENSG00000160299.19	protein_coding	PCNT	2	OTTHUMG00000090665.2	chr21	HAVANA	gene	46324124	46445769	+	-1.12257	5.96543	-17.2827	9.63846e-12	9.16243e-11	16.8769
ENSG00000172244.9	protein_coding	C5orf34	2	OTTHUMG00000131151.6	chr5	HAVANA	gene	43486709	43515148	-	-2.04405	2.96136	-16.8069	1.47128e-11	1.3201e-10	16.8726
ENSG00000102243.13	protein_coding	VGLL1	2	OTTHUMG00000022509.3	chrX	HAVANA	gene	136532215	136556807	+	1.2867	5.01521	17.0622	1.171e-11	1.08532e-10	16.8648
ENSG00000169180.12	protein_coding	XPO6	1	OTTHUMG00000176782.9	chr16	HAVANA	gene	28097976	28211965	-	-0.813818	7.0699	-17.4648	8.22159e-12	7.94526e-11	16.8616
ENSG00000293491.1	lncRNA	TMEM198B	2	NA	chr12	HAVANA	gene	55829608	55836253	+	2.09203	3.3367	16.7938	1.48872e-11	1.33209e-10	16.8608
ENSG00000106105.15	protein_coding	GARS1	2	OTTHUMG00000152769.2	chr7	HAVANA	gene	30580533	30634033	+	-0.575778	8.58365	-17.7057	6.67653e-12	6.60483e-11	16.8581
ENSG00000285517.1	lncRNA	ENSG00000285517	2	OTTHUMG00000169309.3	chr12	HAVANA	gene	30795458	30879268	+	-1.97258	3.32018	-16.7947	1.4875e-11	1.33173e-10	16.856
ENSG00000146909.8	protein_coding	NOM1	2	OTTHUMG00000152639.3	chr7	HAVANA	gene	156949712	156973176	+	-1.24946	4.76198	-17.0228	1.21274e-11	1.11576e-10	16.8559
ENSG00000143819.13	protein_coding	EPHX1	2	OTTHUMG00000037743.4	chr1	HAVANA	gene	225810124	225845563	+	0.930742	6.23809	17.2992	9.50045e-12	9.04707e-11	16.8533
ENSG00000006025.13	protein_coding	OSBPL7	2	OTTHUMG00000178288.2	chr17	HAVANA	gene	47807372	47821803	-	1.60062	4.45714	16.9217	1.32731e-11	1.20687e-10	16.8445
ENSG00000186352.9	protein_coding	ANKRD37	2	OTTHUMG00000160459.3	chr4	HAVANA	gene	185396021	185400628	+	2.71987	2.88314	16.8036	1.4756e-11	1.32325e-10	16.8348
ENSG00000065978.19	protein_coding	YBX1	2	OTTHUMG00000007523.7	chr1	HAVANA	gene	42682418	42703805	+	-0.535799	9.84179	-17.872	5.79165e-12	5.82129e-11	16.825
ENSG00000179218.15	protein_coding	CALR	2	OTTHUMG00000180574.3	chr19	HAVANA	gene	12938578	12944489	+	0.482104	9.89315	17.8741	5.78099e-12	5.81416e-11	16.8214
ENSG00000107672.15	protein_coding	NSMCE4A	2	OTTHUMG00000019180.2	chr10	HAVANA	gene	121957091	121975217	-	-1.35039	4.57125	-16.9336	1.3132e-11	1.19604e-10	16.8093
ENSG00000226688.9	lncRNA	ENTPD1-AS1	2	OTTHUMG00000018822.4	chr10	HAVANA	gene	95732976	96090250	-	-1.56498	3.78237	-16.79	1.49382e-11	1.33591e-10	16.8018
ENSG00000036549.13	protein_coding	ZZZ3	1	OTTHUMG00000009652.7	chr1	HAVANA	gene	77562416	77683419	-	-0.807889	6.5449	-17.3082	9.42582e-12	8.9865e-11	16.7982
ENSG00000167105.8	protein_coding	TMEM92	2	OTTHUMG00000162060.4	chr17	HAVANA	gene	50271406	50281485	+	1.81738	3.64595	16.7367	1.56739e-11	1.39372e-10	16.7876
ENSG00000060558.4	protein_coding	GNA15	2	OTTHUMG00000180637.5	chr19	HAVANA	gene	3136033	3163749	+	0.989778	5.81226	17.1294	1.10333e-11	1.02963e-10	16.7719
ENSG00000114480.13	protein_coding	GBE1	2	OTTHUMG00000158978.3	chr3	HAVANA	gene	81489703	81761645	-	0.834844	6.68267	17.2912	9.5674e-12	9.10551e-11	16.7702
ENSG00000267278.6	lncRNA	MAP3K14-AS1	2	OTTHUMG00000180362.4	chr17	HAVANA	gene	45247916	45269824	+	3.18915	2.39888	16.898	1.35573e-11	1.22996e-10	16.7623
ENSG00000065427.15	protein_coding	KARS1	2	OTTHUMG00000137609.5	chr16	HAVANA	gene	75627474	75648643	-	-0.64252	8.30302	-17.545	7.66858e-12	7.47285e-11	16.753
ENSG00000079739.17	protein_coding	PGM1	2	OTTHUMG00000008968.5	chr1	HAVANA	gene	63593411	63660245	+	0.876669	7.35611	17.3841	8.82005e-12	8.45842e-11	16.7522
ENSG00000175573.7	protein_coding	C11orf68	2	OTTHUMG00000157153.3	chr11	HAVANA	gene	65916810	65919062	-	-0.910378	6.31761	-17.2145	1.02343e-11	9.64452e-11	16.7502
ENSG00000136111.14	protein_coding	TBC1D4	2	OTTHUMG00000017088.5	chr13	HAVANA	gene	75283503	75482169	-	-1.11359	5.17399	-16.9913	1.24732e-11	1.14178e-10	16.749
ENSG00000197632.9	protein_coding	SERPINB2	2	OTTHUMG00000060592.5	chr18	HAVANA	gene	63871692	63903888	+	-1.02142	7.02093	-17.3253	9.28575e-12	8.86852e-11	16.7434
ENSG00000259330.3	protein_coding	INAFM2	2	OTTHUMG00000172415.3	chr15	HAVANA	gene	40323692	40326715	+	-1.37122	4.05788	-16.7669	1.52529e-11	1.36257e-10	16.7377
ENSG00000148688.14	protein_coding	RPP30	2	OTTHUMG00000018733.2	chr10	HAVANA	gene	90871952	90908553	+	-1.13121	5.33466	-16.9954	1.24273e-11	1.13821e-10	16.7238
ENSG00000133816.19	protein_coding	MICAL2	1	OTTHUMG00000165744.9	chr11	HAVANA	gene	12094008	12359144	+	0.609194	9.51652	17.7026	6.694e-12	6.61809e-11	16.7236
ENSG00000129116.20	protein_coding	PALLD	1	OTTHUMG00000161097.11	chr4	HAVANA	gene	168497052	168928457	+	0.792933	8.09424	17.4717	8.17216e-12	7.90218e-11	16.7224
ENSG00000130429.16	protein_coding	ARPC1B	2	OTTHUMG00000154552.34	chr7	HAVANA	gene	99374249	99394816	+	1.30241	4.70489	16.846	1.42046e-11	1.28014e-10	16.7202
ENSG00000179163.12	protein_coding	FUCA1	2	OTTHUMG00000002965.2	chr1	HAVANA	gene	23845077	23868290	-	0.916112	5.80517	17.0734	1.15943e-11	1.07644e-10	16.7191
ENSG00000213859.8	protein_coding	KCTD11	2	OTTHUMG00000132061.4	chr17	HAVANA	gene	7351889	7354944	+	1.2895	4.85903	16.8735	1.3858e-11	1.25445e-10	16.7182
ENSG00000121892.15	protein_coding	PDS5A	2	OTTHUMG00000160582.3	chr4	HAVANA	gene	39822863	39977956	-	-0.69117	7.63544	-17.3962	8.72778e-12	8.38474e-11	16.7145
ENSG00000100629.17	protein_coding	CEP128	1	OTTHUMG00000171442.5	chr14	HAVANA	gene	80476983	80959517	-	-1.57664	4.12263	-16.7337	1.57174e-11	1.39641e-10	16.7035
ENSG00000134697.13	protein_coding	GNL2	1	OTTHUMG00000004322.5	chr1	HAVANA	gene	37566816	37595937	-	-0.823455	6.42858	-17.1821	1.05314e-11	9.89589e-11	16.7008
ENSG00000149532.16	protein_coding	CPSF7	1	OTTHUMG00000168198.5	chr11	HAVANA	gene	61402641	61430031	-	-0.856271	7.55697	-17.3631	8.98374e-12	8.60528e-11	16.6968
ENSG00000123737.13	protein_coding	EXOSC9	1	OTTHUMG00000128783.8	chr4	HAVANA	gene	121801318	121817021	+	-1.02937	5.71097	-17.0255	1.20984e-11	1.11428e-10	16.6818
ENSG00000176974.22	protein_coding	SHMT1	2	OTTHUMG00000059094.7	chr17	HAVANA	gene	18327873	18363550	-	-0.932226	5.56293	-16.9974	1.24046e-11	1.13678e-10	16.6799
ENSG00000197063.11	protein_coding	MAFG	2	OTTHUMG00000177958.3	chr17	HAVANA	gene	81918270	81927735	-	-0.97567	5.91692	-17.06	1.17329e-11	1.08683e-10	16.6764
ENSG00000178409.14	protein_coding	BEND3	2	OTTHUMG00000015308.1	chr6	HAVANA	gene	107065182	107115515	-	-1.6312	3.56915	-16.6225	1.73841e-11	1.53031e-10	16.6732
ENSG00000105197.11	protein_coding	TIMM50	2	OTTHUMG00000183066.6	chr19	HAVANA	gene	39480412	39493785	+	-0.932757	5.71165	-17.0154	1.22073e-11	1.12185e-10	16.6701
ENSG00000143493.13	protein_coding	INTS7	1	OTTHUMG00000037119.4	chr1	HAVANA	gene	211940399	212035557	-	-0.946723	5.79131	-17.0288	1.20633e-11	1.11229e-10	16.6687
ENSG00000127666.11	protein_coding	TICAM1	2	OTTHUMG00000180248.1	chr19	HAVANA	gene	4815932	4831712	-	0.90738	5.86241	17.0287	1.20641e-11	1.11229e-10	16.6673
ENSG00000164167.12	protein_coding	LSM6	2	OTTHUMG00000161440.5	chr4	HAVANA	gene	146175703	146200000	+	-1.75135	3.72763	-16.63	1.7266e-11	1.52073e-10	16.6663
ENSG00000127418.15	protein_coding	FGFRL1	2	OTTHUMG00000118998.4	chr4	HAVANA	gene	1009936	1026898	+	0.949096	5.77143	17.0054	1.23173e-11	1.13068e-10	16.6629
ENSG00000131759.18	protein_coding	RARA	1	OTTHUMG00000133328.6	chr17	HAVANA	gene	40309180	40357643	+	-1.31018	5.06824	-16.8625	1.39959e-11	1.26554e-10	16.6539
ENSG00000165138.18	protein_coding	ANKS6	1	OTTHUMG00000020347.4	chr9	HAVANA	gene	98731329	98796965	-	-1.23585	4.75643	-16.8008	1.47932e-11	1.32586e-10	16.6503
ENSG00000133466.14	protein_coding	C1QTNF6	2	OTTHUMG00000150538.2	chr22	HAVANA	gene	37180166	37199385	-	2.39521	3.1211	16.5556	1.8475e-11	1.60983e-10	16.6447
ENSG00000187446.12	protein_coding	CHP1	2	OTTHUMG00000130233.7	chr15	HAVANA	gene	41230839	41281887	+	0.735723	6.9946	17.2031	1.03381e-11	9.72543e-11	16.6377
ENSG00000067113.17	protein_coding	PLPP1	2	OTTHUMG00000162240.3	chr5	HAVANA	gene	55424854	55534969	-	1.5455	4.03223	16.6187	1.74436e-11	1.53451e-10	16.6254
ENSG00000182326.17	protein_coding	C1S	1	OTTHUMG00000150305.5	chr12	HAVANA	gene	6988259	7071032	+	4.14652	2.08038	17.1768	1.05805e-11	9.93628e-11	16.6183
ENSG00000136811.17	protein_coding	ODF2	1	OTTHUMG00000020748.6	chr9	HAVANA	gene	128455186	128501292	+	-0.860425	6.07267	-17.0282	1.20692e-11	1.11229e-10	16.6177
ENSG00000108588.15	protein_coding	CCDC47	2	OTTHUMG00000178933.5	chr17	HAVANA	gene	63745255	63776351	-	-0.693894	7.539	-17.2692	9.75338e-12	9.24903e-11	16.6118
ENSG00000185189.18	protein_coding	NRBP2	2	OTTHUMG00000165157.3	chr8	HAVANA	gene	143833583	143840973	-	1.93069	3.81362	16.5548	1.84883e-11	1.61012e-10	16.6077
ENSG00000185585.20	protein_coding	OLFML2A	2	OTTHUMG00000020663.4	chr9	HAVANA	gene	124777133	124814885	+	3.20705	2.3448	16.7377	1.56597e-11	1.39356e-10	16.6043
ENSG00000116525.14	protein_coding	TRIM62	1	OTTHUMG00000004132.5	chr1	HAVANA	gene	33145399	33182059	-	1.69343	3.74336	16.5514	1.85462e-11	1.61332e-10	16.6043
ENSG00000170088.14	protein_coding	TMEM192	2	OTTHUMG00000161254.8	chr4	HAVANA	gene	165070608	165208549	-	0.835147	6.91447	17.1514	1.08206e-11	1.01268e-10	16.604
ENSG00000134453.16	protein_coding	RBM17	2	OTTHUMG00000017618.4	chr10	HAVANA	gene	6089034	6117457	+	-1.11656	5.83469	-16.9589	1.28386e-11	1.17193e-10	16.5997
ENSG00000115761.17	protein_coding	NOL10	2	OTTHUMG00000119023.3	chr2	HAVANA	gene	10562347	10689987	-	-1.01497	6.04634	-16.9995	1.23819e-11	1.13597e-10	16.5983
ENSG00000083720.13	protein_coding	OXCT1	2	OTTHUMG00000094783.4	chr5	HAVANA	gene	41730065	41870425	-	-1.05494	6.28554	-17.037	1.1976e-11	1.1062e-10	16.5937
ENSG00000253368.4	protein_coding	TRNP1	2	OTTHUMG00000004277.5	chr1	HAVANA	gene	26993692	27000886	+	-1.01709	5.15799	-16.8214	1.45226e-11	1.30559e-10	16.591
ENSG00000177733.7	protein_coding	HNRNPA0	2	OTTHUMG00000129156.3	chr5	HAVANA	gene	137745651	137754363	-	-0.817287	6.79729	-17.1263	1.10632e-11	1.03124e-10	16.5909
ENSG00000129566.13	protein_coding	TEP1	1	OTTHUMG00000029515.7	chr14	HAVANA	gene	20365667	20413501	-	1.17621	5.46546	16.855	1.40901e-11	1.27172e-10	16.5865
ENSG00000136158.12	protein_coding	SPRY2	2	OTTHUMG00000017140.3	chr13	HAVANA	gene	80335976	80341126	-	-1.16111	4.82999	-16.742	1.55991e-11	1.3912e-10	16.5802
ENSG00000205356.10	protein_coding	TECPR1	2	OTTHUMG00000154273.7	chr7	HAVANA	gene	98214624	98252232	-	1.50534	4.53819	16.6546	1.68844e-11	1.48954e-10	16.5793
ENSG00000159399.10	protein_coding	HK2	1	OTTHUMG00000129972.8	chr2	HAVANA	gene	74834127	74893359	+	-0.940914	6.4806	-17.0547	1.17889e-11	1.09139e-10	16.5758
ENSG00000247092.9	lncRNA	SNHG10	2	OTTHUMG00000171635.5	chr14	HAVANA	gene	95521943	95534889	-	-1.74445	3.98793	-16.5655	1.83096e-11	1.59798e-10	16.5723
ENSG00000197170.10	protein_coding	PSMD12	2	OTTHUMG00000140376.3	chr17	HAVANA	gene	67337916	67366605	-	-0.799621	7.45234	-17.2064	1.03079e-11	9.70263e-11	16.5671
ENSG00000185480.12	protein_coding	PARPBP	1	OTTHUMG00000167923.3	chr12	HAVANA	gene	102120183	102197520	+	-2.16472	3.15454	-16.4675	2.00267e-11	1.72475e-10	16.5664
ENSG00000136261.16	protein_coding	BZW2	2	OTTHUMG00000130755.7	chr7	HAVANA	gene	16646131	16706523	+	-0.898811	6.62666	-17.0678	1.16518e-11	1.08115e-10	16.5641
ENSG00000078269.15	protein_coding	SYNJ2	2	OTTHUMG00000015904.6	chr6	HAVANA	gene	157981863	158099176	+	0.822919	6.50474	17.025	1.21044e-11	1.11428e-10	16.552
ENSG00000165175.17	protein_coding	MID1IP1	2	OTTHUMG00000024092.3	chrX	HAVANA	gene	38801440	38806537	+	-0.952655	5.38879	-16.8259	1.44636e-11	1.30204e-10	16.5517
ENSG00000138395.17	protein_coding	CDK15	1	OTTHUMG00000132838.7	chr2	HAVANA	gene	201790461	201895550	+	3.28729	2.56508	16.5957	1.78121e-11	1.56021e-10	16.5474
ENSG00000059378.13	protein_coding	PARP12	1	OTTHUMG00000157315.2	chr7	HAVANA	gene	140023749	140062951	-	0.933683	5.60242	16.8492	1.41633e-11	1.27713e-10	16.5469
ENSG00000111424.12	protein_coding	VDR	1	OTTHUMG00000169890.4	chr12	HAVANA	gene	47841537	47943048	-	-1.41878	4.36226	-16.6073	1.76262e-11	1.54578e-10	16.5424
ENSG00000196924.19	protein_coding	FLNA	1	OTTHUMG00000022712.33	chrX	HAVANA	gene	154348524	154374634	-	0.469283	12.5956	18.0531	4.96735e-12	5.1061e-11	16.537
ENSG00000161980.6	protein_coding	POLR3K	2	OTTHUMG00000060722.4	chr16	HAVANA	gene	46407	53608	-	-1.70609	3.61561	-16.4776	1.98421e-11	1.71263e-10	16.5358
ENSG00000198816.7	protein_coding	ZNF358	2	OTTHUMG00000182582.4	chr19	HAVANA	gene	7515292	7521025	+	1.35524	4.23181	16.5524	1.85296e-11	1.61286e-10	16.5266
ENSG00000169715.15	protein_coding	MT1E	2	OTTHUMG00000133014.2	chr16	HAVANA	gene	56625475	56627112	+	-0.665409	7.32256	-17.1348	1.09803e-11	1.02586e-10	16.5189
ENSG00000163257.11	protein_coding	DCAF16	2	OTTHUMG00000128536.4	chr4	HAVANA	gene	17800655	17810758	-	-0.977506	5.50168	-16.8099	1.4673e-11	1.31798e-10	16.5166
ENSG00000156510.13	protein_coding	HKDC1	2	OTTHUMG00000018371.3	chr10	HAVANA	gene	69220332	69267552	+	0.940357	6.07812	16.9034	1.34918e-11	1.22471e-10	16.5133
ENSG00000140682.19	protein_coding	TGFB1I1	2	OTTHUMG00000132467.7	chr16	HAVANA	gene	31471585	31477960	+	1.16102	4.97581	16.679	1.65144e-11	1.45926e-10	16.5102
ENSG00000182512.5	protein_coding	GLRX5	2	OTTHUMG00000171636.2	chr14	HAVANA	gene	95533503	95544724	+	-1.02017	6.28331	-16.9468	1.29781e-11	1.18334e-10	16.509
ENSG00000127804.13	protein_coding	METTL16	1	OTTHUMG00000177564.11	chr17	HAVANA	gene	2405562	2511891	-	-0.958939	5.61739	-16.8229	1.45026e-11	1.30484e-10	16.5074
ENSG00000182179.13	protein_coding	UBA7	2	OTTHUMG00000158267.3	chr3	HAVANA	gene	49805209	49813953	-	1.71997	4.56729	16.5685	1.82593e-11	1.59443e-10	16.5037
ENSG00000148335.15	protein_coding	NTMT1	2	OTTHUMG00000020785.3	chr9	HAVANA	gene	129608884	129636135	+	-1.14667	5.23052	-16.7364	1.56786e-11	1.39372e-10	16.5011
ENSG00000118007.13	protein_coding	STAG1	1	OTTHUMG00000159798.5	chr3	HAVANA	gene	136336236	136752403	-	-0.873962	6.71597	-17.014	1.22235e-11	1.1227e-10	16.4994
ENSG00000111671.10	protein_coding	SPSB2	2	OTTHUMG00000156665.4	chr12	HAVANA	gene	6870935	6889358	-	1.1801	5.23082	16.7075	1.6094e-11	1.42753e-10	16.4914
ENSG00000101986.12	protein_coding	ABCD1	2	OTTHUMG00000024215.4	chrX	HAVANA	gene	153724856	153744755	+	2.08591	3.0006	16.3729	2.18446e-11	1.86555e-10	16.4792
ENSG00000158863.22	protein_coding	FHIP2B	2	OTTHUMG00000097088.9	chr8	HAVANA	gene	22089150	22104911	+	1.07378	5.25112	16.6984	1.62267e-11	1.43617e-10	16.4749
ENSG00000116350.18	protein_coding	SRSF4	2	OTTHUMG00000003663.7	chr1	HAVANA	gene	29147743	29181900	-	-0.787167	6.7873	-16.9987	1.23905e-11	1.13612e-10	16.4731
ENSG00000138780.15	protein_coding	GSTCD	2	OTTHUMG00000131211.7	chr4	HAVANA	gene	105708778	105847725	+	-1.33268	4.38873	-16.5395	1.87493e-11	1.62677e-10	16.4717
ENSG00000133393.13	protein_coding	CEP20	2	OTTHUMG00000129923.5	chr16	HAVANA	gene	15865719	15888625	-	-1.45973	4.74423	-16.5963	1.78024e-11	1.56021e-10	16.4678
ENSG00000170949.18	protein_coding	ZNF160	1	OTTHUMG00000182854.3	chr19	HAVANA	gene	53066606	53103434	-	1.26264	4.71056	16.5776	1.81085e-11	1.58382e-10	16.466
ENSG00000159214.13	protein_coding	CCDC24	2	OTTHUMG00000008299.5	chr1	HAVANA	gene	43991359	43996528	+	1.9028	3.5662	16.3768	2.17657e-11	1.86076e-10	16.4644
ENSG00000184787.19	protein_coding	UBE2G2	2	OTTHUMG00000089179.7	chr21	HAVANA	gene	44768580	44801826	-	-0.809049	6.45529	-16.9286	1.31909e-11	1.20074e-10	16.4599
ENSG00000102181.22	protein_coding	CD99L2	2	OTTHUMG00000024247.7	chrX	HAVANA	gene	150766336	150898816	-	1.05072	5.37191	16.7047	1.61345e-11	1.43034e-10	16.4571
ENSG00000101220.18	protein_coding	ADISSP	2	OTTHUMG00000031753.2	chr20	HAVANA	gene	3753508	3767781	-	-0.934475	6.32491	-16.8931	1.36168e-11	1.23468e-10	16.4499
ENSG00000138326.21	protein_coding	RPS24	2	OTTHUMG00000018549.6	chr10	HAVANA	gene	78033760	78056813	+	-0.519357	9.16946	-17.3506	9.08202e-12	8.68411e-11	16.4488
ENSG00000145147.20	protein_coding	SLIT2	2	OTTHUMG00000128551.5	chr4	HAVANA	gene	20251905	20620561	+	-1.73713	3.53936	-16.3705	2.18934e-11	1.86873e-10	16.4448
ENSG00000213593.10	protein_coding	TMX2	2	OTTHUMG00000167200.3	chr11	HAVANA	gene	57712593	57740973	+	-0.904119	6.86413	-16.9696	1.27169e-11	1.16148e-10	16.4354
ENSG00000204568.12	protein_coding	MRPS18B	2	OTTHUMG00000031268.3	chr6	HAVANA	gene	30617840	30626395	+	-0.888391	6.25416	-16.8606	1.4019e-11	1.26691e-10	16.4305
ENSG00000110925.7	protein_coding	CSRNP2	1	OTTHUMG00000169578.7	chr12	HAVANA	gene	51061205	51083664	-	1.06682	5.42488	16.6834	1.64484e-11	1.45422e-10	16.4279
ENSG00000173327.8	protein_coding	MAP3K11	1	OTTHUMG00000166529.5	chr11	HAVANA	gene	65597756	65615382	-	0.858982	7.02356	16.9743	1.26629e-11	1.15719e-10	16.4225
ENSG00000086544.4	protein_coding	ITPKC	2	OTTHUMG00000182688.3	chr19	HAVANA	gene	40717112	40740860	+	1.55912	4.00559	16.3906	2.14907e-11	1.84014e-10	16.4153
ENSG00000184117.12	protein_coding	NIPSNAP1	1	OTTHUMG00000151294.4	chr22	HAVANA	gene	29554808	29581327	-	1.14999	5.50738	16.6779	1.65316e-11	1.45999e-10	16.4106
ENSG00000187522.16	protein_coding	HSPA14	2	OTTHUMG00000191882.2	chr10	HAVANA	gene	14838306	14871741	+	-1.5482	4.12153	-16.4144	2.10268e-11	1.80421e-10	16.4041
ENSG00000133056.14	protein_coding	PIK3C2B	2	OTTHUMG00000036101.4	chr1	HAVANA	gene	204422628	204494805	-	1.59277	3.80996	16.3485	2.23415e-11	1.903e-10	16.4032
ENSG00000086200.17	protein_coding	IPO11	1	OTTHUMG00000154400.5	chr5	HAVANA	gene	62403972	62628582	+	-1.12575	5.79354	-16.7413	1.56087e-11	1.3913e-10	16.4029
ENSG00000132357.14	protein_coding	CARD6	1	OTTHUMG00000094775.9	chr5	HAVANA	gene	40841308	40860175	+	1.32223	4.74673	16.5069	1.93153e-11	1.67055e-10	16.3951
ENSG00000048991.18	protein_coding	R3HDM1	1	OTTHUMG00000131740.11	chr2	HAVANA	gene	135531455	135725270	+	-0.803219	6.44352	-16.8546	1.40955e-11	1.27172e-10	16.3922
ENSG00000136869.16	protein_coding	TLR4	2	OTTHUMG00000021046.7	chr9	HAVANA	gene	117704175	117724735	+	-2.16587	3.10417	-16.2748	2.39183e-11	2.01832e-10	16.3902
ENSG00000099849.15	protein_coding	RASSF7	2	OTTHUMG00000132004.5	chr11	HAVANA	gene	560404	564025	+	1.28144	5.98543	16.7394	1.56362e-11	1.39299e-10	16.388
ENSG00000142687.19	protein_coding	KIAA0319L	1	OTTHUMG00000004370.7	chr1	HAVANA	gene	35393883	35557950	-	0.941696	6.27013	16.7992	1.48152e-11	1.3271e-10	16.3823
ENSG00000150990.9	protein_coding	DHX37	2	OTTHUMG00000168547.4	chr12	HAVANA	gene	124946825	124989131	-	-0.761398	6.41011	-16.821	1.4527e-11	1.30559e-10	16.3654
ENSG00000160325.15	protein_coding	CACFD1	2	OTTHUMG00000020875.2	chr9	HAVANA	gene	133459965	133470848	+	2.67145	2.65505	16.3006	2.33527e-11	1.97879e-10	16.3626
ENSG00000161677.12	protein_coding	JOSD2	1	OTTHUMG00000183062.2	chr19	HAVANA	gene	50505998	50511220	-	1.86207	3.60189	16.272	2.39788e-11	2.02133e-10	16.3626
ENSG00000163577.8	protein_coding	EIF5A2	1	OTTHUMG00000158958.9	chr3	HAVANA	gene	170888418	170908644	-	-1.27931	5.09455	-16.5559	1.84713e-11	1.60983e-10	16.3597
ENSG00000105612.10	protein_coding	DNASE2	2	OTTHUMG00000180535.3	chr19	HAVANA	gene	12875209	12881595	-	0.833587	6.05437	16.7382	1.56533e-11	1.39356e-10	16.3586
ENSG00000143153.14	protein_coding	ATP1B1	2	OTTHUMG00000034590.4	chr1	HAVANA	gene	169105697	169310992	+	-0.890362	6.78933	-16.8707	1.38931e-11	1.25693e-10	16.3537
ENSG00000204389.10	protein_coding	HSPA1A	2	OTTHUMG00000031201.4	chr6	HAVANA	gene	31815543	31817946	+	1.34255	4.66184	16.4446	2.0451e-11	1.75943e-10	16.3525
ENSG00000172167.8	protein_coding	MTBP	2	OTTHUMG00000165040.2	chr8	HAVANA	gene	120445400	120542133	+	-2.03559	2.9428	-16.2319	2.48894e-11	2.08302e-10	16.3516
ENSG00000158186.13	protein_coding	MRAS	1	OTTHUMG00000159888.4	chr3	HAVANA	gene	138347648	138405534	+	2.92102	2.45449	16.3491	2.23294e-11	1.90296e-10	16.3479
ENSG00000104325.7	protein_coding	DECR1	1	OTTHUMG00000163829.4	chr8	HAVANA	gene	90001405	90053633	+	1.15859	4.84222	16.479	1.98154e-11	1.71198e-10	16.345
ENSG00000133657.17	protein_coding	ATP13A3	2	OTTHUMG00000156034.12	chr3	HAVANA	gene	194402672	194498364	-	0.958249	9.12038	17.2206	1.01801e-11	9.59893e-11	16.3432
ENSG00000149100.13	protein_coding	EIF3M	1	OTTHUMG00000166258.5	chr11	HAVANA	gene	32583798	32606264	+	-0.657099	8.36482	-17.108	1.12446e-11	1.04516e-10	16.3407
ENSG00000142459.9	protein_coding	EVI5L	2	OTTHUMG00000182454.3	chr19	HAVANA	gene	7830218	7864976	+	1.31181	4.61481	16.4225	2.08693e-11	1.79164e-10	16.3386
ENSG00000090615.16	protein_coding	GOLGA3	2	OTTHUMG00000168023.7	chr12	HAVANA	gene	132768902	132829143	-	0.681458	7.15707	16.9064	1.34558e-11	1.22211e-10	16.3349
ENSG00000129354.12	protein_coding	AP1M2	1	OTTHUMG00000180584.2	chr19	HAVANA	gene	10572671	10587315	-	0.806585	7.42743	16.9469	1.29772e-11	1.18334e-10	16.3343
ENSG00000100994.12	protein_coding	PYGB	2	OTTHUMG00000032117.4	chr20	HAVANA	gene	25248085	25298012	+	0.741684	7.26199	16.9162	1.33382e-11	1.21212e-10	16.3293
ENSG00000144827.9	protein_coding	ABHD10	2	OTTHUMG00000159280.2	chr3	HAVANA	gene	111979010	111993368	+	-0.922683	5.54991	-16.6183	1.74507e-11	1.53451e-10	16.3256
ENSG00000235173.7	protein_coding	HGH1	2	OTTHUMG00000165246.2	chr8	HAVANA	gene	144137774	144140851	+	-0.966006	5.35715	-16.5715	1.82089e-11	1.59089e-10	16.3174
ENSG00000105339.11	protein_coding	DENND3	1	OTTHUMG00000164775.12	chr8	HAVANA	gene	141117278	141195808	+	1.15474	5.10121	16.4992	1.94536e-11	1.68161e-10	16.3168
ENSG00000137486.17	protein_coding	ARRB1	1	OTTHUMG00000165444.5	chr11	HAVANA	gene	75260122	75351705	-	1.8518	3.71328	16.2316	2.48945e-11	2.08302e-10	16.3134
ENSG00000130985.17	protein_coding	UBA1	2	OTTHUMG00000021436.4	chrX	HAVANA	gene	47190861	47215128	+	0.519971	9.26878	17.208	1.02929e-11	9.69413e-11	16.3051
ENSG00000165501.17	protein_coding	LRR1	1	OTTHUMG00000140273.4	chr14	HAVANA	gene	49598761	49614672	+	-1.88423	3.67848	-16.2331	2.48608e-11	2.08302e-10	16.3043
ENSG00000132906.18	protein_coding	CASP9	1	OTTHUMG00000002256.8	chr1	HAVANA	gene	15490832	15526534	-	1.68171	3.6293	16.2168	2.52393e-11	2.10626e-10	16.3027
ENSG00000185650.10	protein_coding	ZFP36L1	1	OTTHUMG00000171385.4	chr14	HAVANA	gene	68787660	68796253	-	0.584138	9.01268	17.1599	1.07396e-11	1.00625e-10	16.2982
ENSG00000131724.11	protein_coding	IL13RA1	2	OTTHUMG00000022258.4	chrX	HAVANA	gene	118727133	118794535	+	0.816004	6.25922	16.7107	1.60473e-11	1.42416e-10	16.2968
ENSG00000160746.13	protein_coding	ANO10	1	OTTHUMG00000133044.15	chr3	HAVANA	gene	43354859	43691594	-	0.907347	5.98939	16.64	1.71093e-11	1.50775e-10	16.2793
ENSG00000198924.8	protein_coding	DCLRE1A	2	OTTHUMG00000019077.3	chr10	HAVANA	gene	113834725	113854383	-	-1.36614	4.03482	-16.2714	2.3993e-11	2.02149e-10	16.2758
ENSG00000185499.17	protein_coding	MUC1	1	OTTHUMG00000035681.4	chr1	HAVANA	gene	155185824	155192916	-	3.6963	2.41287	16.4029	2.12503e-11	1.82147e-10	16.2676
ENSG00000073350.14	protein_coding	LLGL2	2	OTTHUMG00000179685.3	chr17	HAVANA	gene	75525080	75575209	+	0.986465	6.42627	16.7026	1.61646e-11	1.43224e-10	16.2661
ENSG00000143674.11	protein_coding	MAP3K21	2	OTTHUMG00000037889.2	chr1	HAVANA	gene	233327724	233385148	+	-1.67228	3.92738	-16.2313	2.49022e-11	2.08302e-10	16.2631
ENSG00000162738.7	protein_coding	VANGL2	2	OTTHUMG00000033122.2	chr1	HAVANA	gene	160400564	160428670	+	3.2563	2.14159	16.4324	2.06814e-11	1.77644e-10	16.2629
ENSG00000101493.11	protein_coding	ZNF516	1	OTTHUMG00000165995.7	chr18	HAVANA	gene	76357682	76495242	-	1.60786	4.09787	16.2324	2.48775e-11	2.08302e-10	16.2556
ENSG00000136699.20	protein_coding	SMPD4	1	OTTHUMG00000131624.18	chr2	HAVANA	gene	130151392	130182750	-	-0.784425	6.87476	-16.7816	1.50518e-11	1.34533e-10	16.2552
ENSG00000141384.13	protein_coding	TAF4B	1	OTTHUMG00000179429.3	chr18	HAVANA	gene	26226445	26391685	+	-2.66025	2.32895	-16.2076	2.5457e-11	2.12072e-10	16.2524
ENSG00000010704.19	protein_coding	HFE	1	OTTHUMG00000016348.3	chr6	HAVANA	gene	26087281	26098343	+	1.4454	4.31033	16.2702	2.40196e-11	2.02268e-10	16.2511
ENSG00000049089.15	protein_coding	COL9A2	2	OTTHUMG00000005761.7	chr1	HAVANA	gene	40300489	40317813	-	2.60937	2.82707	16.1399	2.71145e-11	2.23822e-10	16.2441
ENSG00000175224.17	protein_coding	ATG13	1	OTTHUMG00000166538.4	chr11	HAVANA	gene	46617527	46674818	+	0.671346	7.58199	16.8774	1.38103e-11	1.25083e-10	16.2438
ENSG00000135912.11	protein_coding	TTLL4	2	OTTHUMG00000133081.5	chr2	HAVANA	gene	218710835	218755416	+	-1.0863	5.61167	-16.5323	1.88729e-11	1.63488e-10	16.2361
ENSG00000104361.10	protein_coding	NIPAL2	2	OTTHUMG00000164668.3	chr8	HAVANA	gene	98189826	98294393	-	1.39357	4.10281	16.2208	2.51472e-11	2.10136e-10	16.2338
ENSG00000112029.10	protein_coding	FBXO5	2	OTTHUMG00000015854.3	chr6	HAVANA	gene	152970519	152983579	-	-1.4946	3.93918	-16.2034	2.5556e-11	2.12788e-10	16.2296
ENSG00000181472.5	protein_coding	ZBTB2	2	OTTHUMG00000015834.2	chr6	HAVANA	gene	151364115	151391559	-	-1.3805	4.54909	-16.3051	2.32556e-11	1.97159e-10	16.2231
ENSG00000167460.17	protein_coding	TPM4	1	OTTHUMG00000182134.12	chr19	HAVANA	gene	16067021	16103002	+	0.523719	9.5855	17.1694	1.06499e-11	9.98999e-11	16.2224
ENSG00000066044.15	protein_coding	ELAVL1	1	OTTHUMG00000182470.4	chr19	HAVANA	gene	7958573	8005659	-	-0.723552	7.19784	-16.7657	1.52687e-11	1.36323e-10	16.191
ENSG00000133639.6	protein_coding	BTG1	2	OTTHUMG00000170092.6	chr12	HAVANA	gene	92140278	92145846	-	1.39125	6.34684	16.5953	1.78195e-11	1.56021e-10	16.1907
ENSG00000197321.16	protein_coding	SVIL	2	OTTHUMG00000017882.10	chr10	HAVANA	gene	29457338	29736959	-	0.880535	6.16031	16.5722	1.81974e-11	1.59073e-10	16.1839
ENSG00000269893.10	lncRNA	SNHG8	2	OTTHUMG00000183991.6	chr4	HAVANA	gene	118278703	118285316	+	-0.992013	5.44702	-16.4426	2.04889e-11	1.76176e-10	16.1782
ENSG00000158402.21	protein_coding	CDC25C	1	OTTHUMG00000129203.6	chr5	HAVANA	gene	138285269	138338355	-	-1.78505	3.5172	-16.0795	2.86886e-11	2.36218e-10	16.1741
ENSG00000070761.8	protein_coding	CFAP20	1	OTTHUMG00000133490.5	chr16	HAVANA	gene	58113592	58129381	-	-0.897213	5.64502	-16.4775	1.98439e-11	1.71263e-10	16.1734
ENSG00000235863.4	protein_coding	B3GALT4	2	OTTHUMG00000031100.4	chr6	HAVANA	gene	33277123	33284832	+	4.7312	2.11261	16.8089	1.46867e-11	1.31849e-10	16.1716
ENSG00000152147.11	protein_coding	GEMIN6	1	OTTHUMG00000128588.4	chr2	HAVANA	gene	38751534	38785002	+	-1.42154	4.06336	-16.162	2.6562e-11	2.19929e-10	16.1686
ENSG00000075914.13	protein_coding	EXOSC7	1	OTTHUMG00000133095.3	chr3	HAVANA	gene	44975241	45036066	+	-1.19493	4.91388	-16.3148	2.30485e-11	1.95606e-10	16.1602
ENSG00000117595.13	protein_coding	IRF6	2	OTTHUMG00000036521.4	chr1	HAVANA	gene	209785617	209806175	-	1.05036	5.0933	16.3116	2.31169e-11	1.96084e-10	16.1344
ENSG00000111358.14	protein_coding	GTF2H3	2	OTTHUMG00000168697.4	chr12	HAVANA	gene	123633739	123662604	+	-1.13897	5.45341	-16.3935	2.14336e-11	1.83622e-10	16.1338
ENSG00000204592.9	protein_coding	HLA-E	2	OTTHUMG00000031155.3	chr6	HAVANA	gene	30489509	30494194	+	0.746106	7.1837	16.6901	1.63495e-11	1.44626e-10	16.1272
ENSG00000102007.11	protein_coding	PLP2	2	OTTHUMG00000021513.2	chrX	HAVANA	gene	49171898	49175235	+	-0.537026	8.6566	-16.9233	1.32541e-11	1.20581e-10	16.1243
ENSG00000054983.17	protein_coding	GALC	2	OTTHUMG00000028646.4	chr14	HAVANA	gene	87837820	87993665	-	0.990925	5.53673	16.389	2.15242e-11	1.84108e-10	16.1238
ENSG00000104131.13	protein_coding	EIF3J	1	OTTHUMG00000131158.4	chr15	HAVANA	gene	44537125	44563029	+	-1.16232	6.17425	-16.5136	1.91985e-11	1.6622e-10	16.1203
ENSG00000169045.19	protein_coding	HNRNPH1	1	OTTHUMG00000130908.43	chr5	HAVANA	gene	179614178	179634784	-	-0.656552	8.49011	-16.8901	1.36539e-11	1.23735e-10	16.1177
ENSG00000130402.14	protein_coding	ACTN4	1	OTTHUMG00000137382.4	chr19	HAVANA	gene	38647649	38731589	+	0.532148	9.40129	17.0217	1.21391e-11	1.11621e-10	16.1116
ENSG00000186594.16	lncRNA	MIR22HG	2	OTTHUMG00000132197.7	chr17	HAVANA	gene	1711447	1717174	-	1.65532	5.26035	16.2894	2.35965e-11	1.99841e-10	16.11
ENSG00000106028.11	protein_coding	SSBP1	2	OTTHUMG00000157572.4	chr7	HAVANA	gene	141738334	141787922	+	-0.833271	6.7614	-16.6092	1.75951e-11	1.54471e-10	16.1092
ENSG00000249115.9	protein_coding	HAUS5	2	OTTHUMG00000048110.7	chr19	HAVANA	gene	35612735	35625355	+	-1.46593	3.80475	-16.0527	2.94183e-11	2.41738e-10	16.1039
ENSG00000112242.16	protein_coding	E2F3	2	OTTHUMG00000016389.3	chr6	HAVANA	gene	20401879	20493714	+	-0.978324	5.2294	-16.3233	2.28677e-11	1.94375e-10	16.1037
ENSG00000164430.17	protein_coding	CGAS	2	OTTHUMG00000015034.7	chr6	HAVANA	gene	73413515	73452297	-	-1.2807	4.60499	-16.1871	2.59466e-11	2.15659e-10	16.0959
ENSG00000210082.2	Mt_rRNA	MT-RNR2	3	NA	chrM	ENSEMBL	gene	1671	3229	+	0.8076	11.1369	17.2814	9.64958e-12	9.16767e-11	16.0875
ENSG00000143157.12	protein_coding	POGK	2	OTTHUMG00000034325.2	chr1	HAVANA	gene	166839447	166856359	+	-0.730702	6.94476	-16.6145	1.75111e-11	1.53899e-10	16.085
ENSG00000278053.5	protein_coding	DDX52	2	OTTHUMG00000188475.2	chr17	HAVANA	gene	37609739	37643446	-	-0.703269	6.83545	-16.5925	1.7864e-11	1.56327e-10	16.0805
ENSG00000110042.8	protein_coding	DTX4	2	OTTHUMG00000167336.3	chr11	HAVANA	gene	59171430	59208588	+	2.36762	3.04772	15.9295	3.30345e-11	2.67808e-10	16.0695
ENSG00000100410.8	protein_coding	PHF5A	2	OTTHUMG00000150966.2	chr22	HAVANA	gene	41459717	41468692	-	-1.16331	4.62876	-16.1475	2.69215e-11	2.22454e-10	16.0501
ENSG00000176393.11	protein_coding	RNPEP	2	OTTHUMG00000035866.5	chr1	HAVANA	gene	201982372	202006147	+	0.750458	6.84383	16.5502	1.85677e-11	1.61358e-10	16.0463
ENSG00000163694.15	protein_coding	RBM47	2	OTTHUMG00000128598.5	chr4	HAVANA	gene	40423267	40630875	-	0.933124	5.78554	16.3568	2.2172e-11	1.89054e-10	16.0452
ENSG00000162976.13	protein_coding	SLC66A3	1	OTTHUMG00000119055.6	chr2	HAVANA	gene	11155198	11178870	+	3.00738	2.91547	15.9254	3.31625e-11	2.68578e-10	16.0418
ENSG00000163898.10	protein_coding	LIPH	1	OTTHUMG00000156657.3	chr3	HAVANA	gene	185506262	185552588	-	2.9005	2.31439	16.0408	2.97507e-11	2.44345e-10	16.0402
ENSG00000102349.18	protein_coding	KLF8	2	OTTHUMG00000021666.4	chrX	HAVANA	gene	56232356	56291531	+	1.78036	3.39378	15.9066	3.37597e-11	2.72873e-10	16.0316
ENSG00000121644.19	protein_coding	DESI2	2	OTTHUMG00000040398.3	chr1	HAVANA	gene	244653103	244709033	+	-0.904651	6.04799	-16.4043	2.12233e-11	1.82011e-10	16.0313
ENSG00000196116.8	protein_coding	TDRD7	2	OTTHUMG00000020326.2	chr9	HAVANA	gene	97412096	97496125	+	1.13337	5.1706	16.2128	2.53351e-11	2.11164e-10	16.0273
ENSG00000075336.12	protein_coding	TIMM21	2	OTTHUMG00000132844.4	chr18	HAVANA	gene	74148523	74160531	+	-1.39567	4.01482	-16.0013	3.08754e-11	2.53073e-10	16.0204
ENSG00000157500.12	protein_coding	APPL1	2	OTTHUMG00000133756.14	chr3	HAVANA	gene	57227726	57278105	+	-1.02383	5.65008	-16.3155	2.30325e-11	1.95573e-10	16.0193
ENSG00000164815.11	protein_coding	ORC5	2	OTTHUMG00000157275.2	chr7	HAVANA	gene	104126341	104208047	-	-1.26306	4.44009	-16.0774	2.87452e-11	2.36564e-10	16.0192
ENSG00000144560.16	protein_coding	VGLL4	1	OTTHUMG00000129739.21	chr3	HAVANA	gene	11556069	11771350	-	1.10757	5.10427	16.1921	2.58256e-11	2.14814e-10	16.0191
ENSG00000141456.16	protein_coding	PELP1	2	OTTHUMG00000177831.10	chr17	HAVANA	gene	4669774	4704337	-	-0.984477	5.79451	-16.3411	2.24944e-11	1.91402e-10	16.0169
ENSG00000152795.18	protein_coding	HNRNPDL	2	OTTHUMG00000130299.6	chr4	HAVANA	gene	82422565	82430462	-	-0.599026	8.29486	-16.7503	1.54823e-11	1.38155e-10	16.0135
ENSG00000167962.15	protein_coding	ZNF598	2	OTTHUMG00000176955.7	chr16	HAVANA	gene	1997654	2009821	-	-0.992659	6.0155	-16.3734	2.18351e-11	1.86555e-10	16.0088
ENSG00000102572.15	protein_coding	STK24	1	OTTHUMG00000017250.3	chr13	HAVANA	gene	98445185	98577940	-	-0.682492	7.01246	-16.5353	1.88219e-11	1.6322e-10	15.9985
ENSG00000166016.6	protein_coding	ABTB2	2	OTTHUMG00000044382.5	chr11	HAVANA	gene	34150987	34358010	-	1.72318	4.06464	15.9525	3.23262e-11	2.63638e-10	15.9963
ENSG00000136478.9	protein_coding	TEX2	2	OTTHUMG00000178881.2	chr17	HAVANA	gene	64147227	64263260	-	-0.880903	6.17637	-16.3891	2.15218e-11	1.84108e-10	15.9942
ENSG00000090989.18	protein_coding	EXOC1	2	OTTHUMG00000102165.5	chr4	HAVANA	gene	55853648	55905086	+	0.843906	6.12514	16.3598	2.21095e-11	1.88619e-10	15.9848
ENSG00000171552.14	protein_coding	BCL2L1	2	OTTHUMG00000032192.4	chr20	HAVANA	gene	31664452	31723989	-	-0.588749	8.03287	-16.6753	1.65706e-11	1.46264e-10	15.9803
ENSG00000136122.18	protein_coding	BORA	2	OTTHUMG00000017068.7	chr13	HAVANA	gene	72727749	72756198	+	-1.6919	4.03903	-15.9489	3.24376e-11	2.64151e-10	15.976
ENSG00000101266.19	protein_coding	CSNK2A1	2	OTTHUMG00000031636.13	chr20	HAVANA	gene	472498	543835	-	-0.801	7.06379	-16.5114	1.92373e-11	1.66468e-10	15.9687
ENSG00000138376.11	protein_coding	BARD1	2	OTTHUMG00000133016.9	chr2	HAVANA	gene	214725646	214809683	-	-1.74971	3.85253	-15.9095	3.36662e-11	2.72252e-10	15.9681
ENSG00000160957.15	protein_coding	RECQL4	2	OTTHUMG00000165178.7	chr8	HAVANA	gene	144511288	144517845	-	-1.44209	5.27235	-16.1751	2.62378e-11	2.17653e-10	15.9656
ENSG00000160326.14	protein_coding	SLC2A6	2	OTTHUMG00000020874.4	chr9	HAVANA	gene	133471094	133479127	-	1.82607	4.45464	15.9766	3.16001e-11	2.58493e-10	15.9627
ENSG00000164465.19	protein_coding	DCBLD1	2	OTTHUMG00000015455.3	chr6	HAVANA	gene	117453817	117569858	+	0.886649	5.77588	16.2622	2.41981e-11	2.03456e-10	15.9538
ENSG00000125734.16	protein_coding	GPR108	1	OTTHUMG00000170129.5	chr19	HAVANA	gene	6729914	6737580	-	0.991104	5.41195	16.1868	2.59536e-11	2.15659e-10	15.952
ENSG00000142156.16	protein_coding	COL6A1	2	OTTHUMG00000090440.2	chr21	HAVANA	gene	45981770	46005050	+	0.739112	6.84124	16.4509	2.03335e-11	1.75025e-10	15.9511
ENSG00000162062.15	protein_coding	TEDC2	2	OTTHUMG00000128859.6	chr16	HAVANA	gene	2460086	2464963	+	-1.97505	3.10498	-15.8006	3.73288e-11	2.98905e-10	15.9436
ENSG00000135414.10	protein_coding	GDF11	2	OTTHUMG00000170188.5	chr12	HAVANA	gene	55743122	55757264	+	1.00513	5.45186	16.185	2.59982e-11	2.15919e-10	15.943
ENSG00000100644.17	protein_coding	HIF1A	1	OTTHUMG00000140344.4	chr14	HAVANA	gene	61695513	61748259	+	0.533648	10.0578	16.94	1.30573e-11	1.1899e-10	15.9362
ENSG00000111530.13	protein_coding	CAND1	1	OTTHUMG00000169060.3	chr12	HAVANA	gene	67269358	67319953	+	-0.660592	7.48481	-16.5419	1.87088e-11	1.62412e-10	15.934
ENSG00000006282.22	protein_coding	SPATA20	2	OTTHUMG00000162162.5	chr17	HAVANA	gene	50543058	50555852	+	1.2237	5.9705	16.264	2.41576e-11	2.03245e-10	15.9329
ENSG00000163814.8	protein_coding	CDCP1	2	OTTHUMG00000133090.4	chr3	HAVANA	gene	45082277	45146422	-	-0.610347	7.94457	-16.6111	1.75649e-11	1.54289e-10	15.932
ENSG00000130741.11	protein_coding	EIF2S3	2	OTTHUMG00000021262.3	chrX	HAVANA	gene	24054946	24078810	+	-0.631188	8.19886	-16.6483	1.69804e-11	1.49719e-10	15.9304
ENSG00000115368.10	protein_coding	WDR75	2	OTTHUMG00000132660.3	chr2	HAVANA	gene	189441446	189475552	+	-1.12205	5.96888	-16.2781	2.38436e-11	2.01306e-10	15.9282
ENSG00000135931.19	protein_coding	ARMC9	1	OTTHUMG00000133229.9	chr2	HAVANA	gene	231198546	231376848	+	0.656767	7.1577	16.4757	1.98757e-11	1.71446e-10	15.9243
ENSG00000143545.10	protein_coding	RAB13	2	OTTHUMG00000036589.4	chr1	HAVANA	gene	153981617	153986358	-	1.2651	4.65115	15.9968	3.10048e-11	2.53878e-10	15.9192
ENSG00000007384.15	protein_coding	RHBDF1	1	OTTHUMG00000060719.15	chr16	HAVANA	gene	58059	76355	-	1.4564	4.57218	15.9699	3.17999e-11	2.59997e-10	15.9172
ENSG00000087087.20	protein_coding	SRRT	1	OTTHUMG00000157031.7	chr7	HAVANA	gene	100875103	100888664	+	-0.835988	7.19001	-16.4688	2.00018e-11	1.72443e-10	15.909
ENSG00000214530.10	protein_coding	STARD10	1	OTTHUMG00000192625.1	chr11	HAVANA	gene	72754729	72794047	-	0.953547	5.91758	16.2391	2.47225e-11	2.07438e-10	15.9081
ENSG00000143367.17	protein_coding	TUFT1	2	OTTHUMG00000012536.4	chr1	HAVANA	gene	151540305	151583583	+	1.05433	5.26024	16.1077	2.79414e-11	2.30414e-10	15.906
ENSG00000162434.14	protein_coding	JAK1	2	OTTHUMG00000009310.7	chr1	HAVANA	gene	64833223	65067754	-	0.607287	7.82533	16.5582	1.84315e-11	1.60775e-10	15.9029
ENSG00000267321.4	lncRNA	SNHG30	2	OTTHUMG00000179915.4	chr17	HAVANA	gene	35568050	35574900	+	-1.68491	3.36556	-15.7734	3.83074e-11	3.05691e-10	15.8937
ENSG00000178295.15	protein_coding	GEN1	2	OTTHUMG00000121173.6	chr2	HAVANA	gene	17753858	17788946	+	-1.01132	5.13955	-16.0827	2.8603e-11	2.35632e-10	15.8879
ENSG00000145912.10	protein_coding	NHP2	2	OTTHUMG00000130886.5	chr5	HAVANA	gene	178149463	178153894	-	-0.771365	6.18942	-16.2799	2.38059e-11	2.01092e-10	15.8844
ENSG00000099942.13	protein_coding	CRKL	2	OTTHUMG00000150807.2	chr22	HAVANA	gene	20917407	20953747	+	-0.828474	6.05071	-16.2535	2.43936e-11	2.04889e-10	15.8836
ENSG00000176928.7	protein_coding	GCNT4	2	OTTHUMG00000131272.3	chr5	HAVANA	gene	75025346	75052558	-	2.7944	2.82448	15.7516	3.91111e-11	3.11494e-10	15.8809
ENSG00000134758.14	protein_coding	RNF138	2	OTTHUMG00000132265.4	chr18	HAVANA	gene	32091874	32131561	+	-1.54077	3.99657	-15.849	3.56505e-11	2.8631e-10	15.8803
ENSG00000188157.15	protein_coding	AGRN	2	OTTHUMG00000040778.7	chr1	HAVANA	gene	1020120	1056118	+	0.759744	9.18353	16.7319	1.57425e-11	1.39788e-10	15.8715
ENSG00000172534.14	protein_coding	HCFC1	1	OTTHUMG00000024222.6	chrX	HAVANA	gene	153947557	153971818	-	-0.677426	8.00505	-16.5453	1.86508e-11	1.61994e-10	15.8602
ENSG00000138448.13	protein_coding	ITGAV	2	OTTHUMG00000132635.6	chr2	HAVANA	gene	186590010	186680901	+	1.00986	7.57559	16.4675	2.00261e-11	1.72475e-10	15.8588
ENSG00000197119.13	protein_coding	SLC25A29	1	OTTHUMG00000171569.5	chr14	HAVANA	gene	100291116	100306547	-	1.10972	6.13221	16.2166	2.52446e-11	2.10626e-10	15.8535
ENSG00000100335.15	protein_coding	MIEF1	1	OTTHUMG00000151105.4	chr22	HAVANA	gene	39499432	39518132	+	-0.84004	5.80115	-16.1742	2.62604e-11	2.17653e-10	15.8508
ENSG00000106244.13	protein_coding	PDAP1	2	OTTHUMG00000154629.3	chr7	HAVANA	gene	99392048	99408597	-	-0.672104	7.36817	-16.4368	2.05972e-11	1.77014e-10	15.8503
ENSG00000122257.20	protein_coding	RBBP6	2	OTTHUMG00000096991.11	chr16	HAVANA	gene	24537693	24572863	+	-0.849291	5.84847	-16.1771	2.61904e-11	2.17404e-10	15.8453
ENSG00000145907.16	protein_coding	G3BP1	2	OTTHUMG00000130123.4	chr5	HAVANA	gene	151771045	151812911	+	-0.739344	8.15894	-16.5509	1.85548e-11	1.61332e-10	15.8434
ENSG00000154945.7	protein_coding	ANKRD40	2	OTTHUMG00000162255.5	chr17	HAVANA	gene	50693198	50707914	-	-0.82687	6.88904	-16.3444	2.24273e-11	1.90931e-10	15.8343
ENSG00000039139.11	protein_coding	DNAH5	2	OTTHUMG00000090533.4	chr5	HAVANA	gene	13690328	14011818	-	2.38892	2.87498	15.6745	4.21026e-11	3.33041e-10	15.824
ENSG00000142102.16	protein_coding	PGGHG	1	OTTHUMG00000153218.5	chr11	HAVANA	gene	289126	296107	+	2.15601	3.88502	15.7214	4.02555e-11	3.19672e-10	15.8164
ENSG00000124429.18	protein_coding	POF1B	2	OTTHUMG00000021934.5	chrX	HAVANA	gene	85277396	85379717	-	2.83794	2.35864	15.7599	3.88039e-11	3.0935e-10	15.806
ENSG00000149932.17	protein_coding	TMEM219	1	OTTHUMG00000177105.9	chr16	HAVANA	gene	29940885	29973050	+	1.21569	4.92001	15.9316	3.29717e-11	2.67431e-10	15.8038
ENSG00000063244.14	protein_coding	U2AF2	2	OTTHUMG00000180908.4	chr19	HAVANA	gene	55654146	55674716	+	-0.563878	8.3163	-16.533	1.886e-11	1.63463e-10	15.8022
ENSG00000213676.13	protein_coding	ATF6B	2	OTTHUMG00000192589.4	chr6	HAVANA	gene	32115264	32128253	-	0.726347	6.80964	16.2882	2.36223e-11	1.99955e-10	15.7983
ENSG00000116922.15	protein_coding	AIRIM	2	OTTHUMG00000004323.6	chr1	HAVANA	gene	37681570	37692249	-	-1.39862	4.19614	-15.8007	3.73244e-11	2.98905e-10	15.7958
ENSG00000198573.7	protein_coding	SPANXC	2	OTTHUMG00000022556.3	chrX	HAVANA	gene	141241463	141242517	-	1.72604	4.13888	15.7589	3.88405e-11	3.0949e-10	15.7948
ENSG00000049249.10	protein_coding	TNFRSF9	1	OTTHUMG00000001223.5	chr1	HAVANA	gene	7915871	7943165	-	4.61152	2.1369	16.2557	2.43445e-11	2.04582e-10	15.7937
ENSG00000178607.17	protein_coding	ERN1	2	OTTHUMG00000178879.4	chr17	HAVANA	gene	64039080	64130819	-	-0.987172	5.33831	-16.025	3.01929e-11	2.47853e-10	15.7934
ENSG00000138759.20	protein_coding	FRAS1	1	OTTHUMG00000160856.5	chr4	HAVANA	gene	78057323	78544269	+	0.93606	6.57167	16.2299	2.49356e-11	2.08474e-10	15.7852
ENSG00000033100.17	protein_coding	CHPF2	1	OTTHUMG00000157380.6	chr7	HAVANA	gene	151232483	151240979	+	0.78974	6.73935	16.2377	2.47542e-11	2.07597e-10	15.7617
ENSG00000169251.13	protein_coding	NMD3	2	OTTHUMG00000159063.5	chr3	HAVANA	gene	161104696	161253532	+	-0.904964	6.32111	-16.1743	2.62592e-11	2.17653e-10	15.7613
ENSG00000167470.14	protein_coding	MIDN	2	OTTHUMG00000180144.5	chr19	HAVANA	gene	1248553	1259143	+	0.812436	6.32322	16.1552	2.67304e-11	2.21211e-10	15.7509
ENSG00000128604.21	protein_coding	IRF5	2	OTTHUMG00000158410.7	chr7	HAVANA	gene	128937457	128950038	+	1.56139	3.6748	15.6489	4.31501e-11	3.40831e-10	15.7483
ENSG00000179950.15	protein_coding	PUF60	2	OTTHUMG00000165155.3	chr8	HAVANA	gene	143816344	143830709	-	-0.635196	7.35379	-16.3248	2.28355e-11	1.94203e-10	15.7437
ENSG00000196715.7	protein_coding	VKORC1L1	2	OTTHUMG00000129449.5	chr7	HAVANA	gene	65873074	65959563	+	-0.845399	5.97438	-16.0878	2.84671e-11	2.34631e-10	15.7355
ENSG00000084764.12	protein_coding	MAPRE3	1	OTTHUMG00000097067.6	chr2	HAVANA	gene	26970637	27027219	+	1.36279	4.10028	15.6918	4.14103e-11	3.28043e-10	15.7211
ENSG00000151247.13	protein_coding	EIF4E	1	OTTHUMG00000161090.2	chr4	HAVANA	gene	98879276	98929133	-	-1.17393	5.44406	-15.9658	3.19225e-11	2.60869e-10	15.7202
ENSG00000171823.7	protein_coding	FBXL14	2	OTTHUMG00000090369.4	chr12	HAVANA	gene	1565993	1594581	-	-1.12651	4.66622	-15.8165	3.67676e-11	2.94991e-10	15.719
ENSG00000132153.15	protein_coding	DHX30	1	OTTHUMG00000133522.3	chr3	HAVANA	gene	47802909	47850195	+	-0.720044	6.82523	-16.215	2.52826e-11	2.10835e-10	15.7172
ENSG00000177663.15	protein_coding	IL17RA	1	OTTHUMG00000150026.2	chr22	HAVANA	gene	17084954	17115693	+	0.849986	5.76735	15.9998	3.09179e-11	2.53294e-10	15.6977
ENSG00000174444.15	protein_coding	RPL4	1	OTTHUMG00000133193.5	chr15	HAVANA	gene	66498015	66524532	-	-0.423496	10.1273	-16.6995	1.62109e-11	1.43556e-10	15.6942
ENSG00000111801.16	protein_coding	BTN3A3	2	OTTHUMG00000014451.6	chr6	HAVANA	gene	26440472	26453415	+	2.04301	3.13648	15.5307	4.83465e-11	3.77668e-10	15.69
ENSG00000151176.8	protein_coding	PLBD2	1	OTTHUMG00000169567.3	chr12	HAVANA	gene	113358566	113391629	+	0.713846	7.48743	16.2813	2.37746e-11	2.00931e-10	15.6867
ENSG00000161714.12	protein_coding	PLCD3	1	OTTHUMG00000168029.7	chr17	HAVANA	gene	45108959	45133354	-	0.761049	6.68684	16.1524	2.67992e-11	2.21668e-10	15.6863
ENSG00000158545.16	protein_coding	ZC3H18	1	OTTHUMG00000137679.8	chr16	HAVANA	gene	88570403	88631964	+	-0.714901	6.48684	-16.1277	2.74259e-11	2.26277e-10	15.6853
ENSG00000105701.16	protein_coding	FKBP8	1	OTTHUMG00000183368.12	chr19	HAVANA	gene	18531751	18544077	-	0.67152	7.44026	16.2725	2.39696e-11	2.02133e-10	15.6847
ENSG00000169992.10	protein_coding	NLGN2	1	OTTHUMG00000108138.4	chr17	HAVANA	gene	7404874	7419860	+	0.94532	5.46472	15.9049	3.38116e-11	2.73157e-10	15.6639
[truncated: 14,304 more rows]

## Sheet: KKU-213A RMC7977 vs Veh
gene_id	gene_type	gene_name	level	havana_gene	chr	DB	Type	start	end	strand	logFC	AveExpr	t	P.Value	adj.P.Val	B
ENSG00000146674.16	protein_coding	IGFBP3	1	OTTHUMG00000023769.10	chr7	HAVANA	gene	45912245	45921874	-	4.6759	9.2456	98.4003	1.33485e-26	2.2348e-22	50.9205
ENSG00000186832.9	protein_coding	KRT16	2	OTTHUMG00000133495.5	chr17	HAVANA	gene	41609778	41615899	-	4.25365	8.04089	78.5978	8.4141e-25	5.34771e-21	46.9098
ENSG00000091986.16	protein_coding	CCDC80	1	OTTHUMG00000159265.4	chr3	HAVANA	gene	112596797	112649530	-	4.88575	7.25202	78.0452	9.58257e-25	5.34771e-21	46.5014
ENSG00000111057.11	protein_coding	KRT18	2	OTTHUMG00000169882.3	chr12	HAVANA	gene	52948871	52952906	+	-3.25534	8.61947	-73.8179	2.67385e-24	1.11914e-20	45.9246
ENSG00000120885.22	protein_coding	CLU	1	OTTHUMG00000102114.8	chr8	HAVANA	gene	27596917	27614700	-	3.73271	8.2391	70.4104	6.38586e-24	2.13824e-20	45.0474
ENSG00000128422.18	protein_coding	KRT17	2	OTTHUMG00000133505.5	chr17	HAVANA	gene	41619442	41624842	-	2.64857	12.6621	69.4383	8.24923e-24	2.30181e-20	44.8876
ENSG00000120875.9	protein_coding	DUSP4	1	OTTHUMG00000133395.3	chr8	HAVANA	gene	29333064	29350684	-	-5.10792	6.65192	-67.3917	1.4311e-23	3.42278e-20	43.7671
ENSG00000081277.13	protein_coding	PKP1	2	OTTHUMG00000035729.3	chr1	HAVANA	gene	201283452	201332993	+	4.31126	6.56573	66.3903	1.88525e-23	3.94536e-20	43.6573
ENSG00000166920.13	protein_coding	C15orf48	2	OTTHUMG00000131424.3	chr15	HAVANA	gene	45430579	45448761	+	3.89844	7.33185	63.9771	3.72698e-23	6.93302e-20	43.2475
ENSG00000166508.19	protein_coding	MCM7	2	OTTHUMG00000154671.10	chr7	HAVANA	gene	100092233	100101940	-	-3.0387	7.48553	-59.2357	1.53673e-22	2.3389e-19	41.9238
ENSG00000175592.9	protein_coding	FOSL1	1	OTTHUMG00000166715.5	chr11	HAVANA	gene	65892049	65900573	-	-4.42574	6.93687	-59.3205	1.49681e-22	2.3389e-19	41.8182
ENSG00000135318.12	protein_coding	NT5E	2	OTTHUMG00000015139.3	chr6	HAVANA	gene	85449584	85495791	+	-3.14565	7.39316	-57.517	2.64082e-22	3.39143e-19	41.3875
ENSG00000196230.14	protein_coding	TUBB	2	OTTHUMG00000031059.3	chr6	HAVANA	gene	30717435	30725538	+	-2.19237	10.0139	-57.0863	3.03211e-22	3.39143e-19	41.2778
ENSG00000185585.20	protein_coding	OLFML2A	2	OTTHUMG00000020663.4	chr9	HAVANA	gene	124777133	124814885	+	2.79434	7.43808	57.0798	3.03855e-22	3.39143e-19	41.2609
ENSG00000156804.7	protein_coding	FBXO32	2	OTTHUMG00000164981.2	chr8	HAVANA	gene	123497889	123541206	-	4.13997	6.00599	58.1622	2.15107e-22	3.00111e-19	41.2604
ENSG00000123416.15	protein_coding	TUBA1B	1	OTTHUMG00000170410.2	chr12	HAVANA	gene	49127782	49131397	-	-2.41471	9.38508	-55.4459	5.18202e-22	5.02212e-19	40.7461
ENSG00000137331.12	protein_coding	IER3	2	OTTHUMG00000031265.3	chr6	HAVANA	gene	30743199	30744548	-	-3.61758	6.49457	-55.8388	4.55137e-22	4.76244e-19	40.7425
ENSG00000184292.7	protein_coding	TACSTD2	2	OTTHUMG00000010067.2	chr1	HAVANA	gene	58575433	58577252	-	2.82753	9.74952	55.0189	5.97323e-22	5.02212e-19	40.5981
ENSG00000197746.15	protein_coding	PSAP	2	OTTHUMG00000018429.6	chr10	HAVANA	gene	71816298	71851251	-	2.11362	10.8242	55.0058	5.99943e-22	5.02212e-19	40.5702
ENSG00000168496.4	protein_coding	FEN1	1	OTTHUMG00000168162.5	chr11	HAVANA	gene	61792911	61797238	+	-3.06565	6.74652	-55.071	5.8702e-22	5.02212e-19	40.5613
ENSG00000171848.16	protein_coding	RRM2	2	OTTHUMG00000185555.7	chr2	HAVANA	gene	10120698	10211725	+	-3.54687	6.49332	-54.8042	6.41803e-22	5.1167e-19	40.4194
ENSG00000137699.17	protein_coding	TRIM29	1	OTTHUMG00000140377.8	chr11	HAVANA	gene	120111286	120185529	-	2.38122	8.56208	54.0194	8.36567e-22	6.08948e-19	40.2725
ENSG00000115758.14	protein_coding	ODC1	2	OTTHUMG00000090450.5	chr2	HAVANA	gene	10439968	10448327	-	-2.98083	6.83195	-54.0984	8.14425e-22	6.08948e-19	40.2539
ENSG00000011426.11	protein_coding	ANLN	1	OTTHUMG00000023143.8	chr7	HAVANA	gene	36389821	36453791	+	-2.80283	7.40289	-53.7088	9.30064e-22	6.24592e-19	40.157
ENSG00000117399.14	protein_coding	CDC20	2	OTTHUMG00000007420.3	chr1	HAVANA	gene	43358981	43363203	+	-3.15857	6.71229	-53.5642	9.77277e-22	6.29291e-19	40.0609
ENSG00000112118.20	protein_coding	MCM3	1	OTTHUMG00000014844.7	chr6	HAVANA	gene	52264014	52284881	-	-2.85907	7.25839	-53.2139	1.10248e-21	6.83622e-19	39.9837
ENSG00000104738.19	protein_coding	MCM4	1	OTTHUMG00000164205.7	chr8	HAVANA	gene	47960185	47978160	+	-2.62239	7.80251	-52.9858	1.19301e-21	7.13333e-19	39.9185
ENSG00000078804.13	protein_coding	TP53INP2	2	OTTHUMG00000032310.4	chr20	HAVANA	gene	34704339	34713439	+	4.07132	5.83435	53.7006	9.32673e-22	6.24592e-19	39.8649
ENSG00000291237.1	protein_coding	SOD2	2	OTTHUMG00000015940.5	chr6	HAVANA	gene	159669069	159762529	-	3.13522	8.47412	52.5961	1.36622e-21	7.62442e-19	39.7822
ENSG00000146670.10	protein_coding	CDCA5	2	OTTHUMG00000150420.3	chr11	HAVANA	gene	65066300	65084164	-	-3.26933	6.23829	-52.689	1.32265e-21	7.62442e-19	39.7044
ENSG00000088325.16	protein_coding	TPX2	2	OTTHUMG00000032190.3	chr20	HAVANA	gene	31739271	31801805	+	-2.73748	7.65478	-52.0305	1.66632e-21	8.78446e-19	39.5843
ENSG00000073111.14	protein_coding	MCM2	1	OTTHUMG00000159637.9	chr3	HAVANA	gene	127598410	127622436	+	-3.13297	6.7009	-52.009	1.67903e-21	8.78446e-19	39.5346
ENSG00000163435.16	protein_coding	ELF3	2	OTTHUMG00000035867.5	chr1	HAVANA	gene	202007945	202017183	+	2.91338	7.91398	51.7533	1.83808e-21	9.0509e-19	39.4875
ENSG00000135821.19	protein_coding	GLUL	2	OTTHUMG00000037407.3	chr1	HAVANA	gene	182378098	182392206	-	2.7944	8.75771	51.7647	1.83064e-21	9.0509e-19	39.4833
ENSG00000151632.18	protein_coding	AKR1C2	2	OTTHUMG00000017584.4	chr10	HAVANA	gene	4987775	5018031	-	3.15575	6.34851	51.0721	2.34436e-21	1.09026e-18	39.1803
ENSG00000171992.13	protein_coding	SYNPO	2	OTTHUMG00000130078.3	chr5	HAVANA	gene	150601080	150659207	+	3.39661	6.18554	50.9337	2.46407e-21	1.11496e-18	39.0999
ENSG00000112715.26	protein_coding	VEGFA	2	OTTHUMG00000014745.14	chr6	HAVANA	gene	43770184	43786487	+	-3.06151	6.91437	-50.4765	2.90769e-21	1.2362e-18	39.0117
ENSG00000134057.15	protein_coding	CCNB1	1	OTTHUMG00000097817.5	chr5	HAVANA	gene	69167135	69178245	+	-2.7289	6.91469	-50.4253	2.96236e-21	1.2362e-18	38.9979
ENSG00000173391.9	protein_coding	OLR1	1	OTTHUMG00000168527.5	chr12	HAVANA	gene	10158301	10172138	-	4.93383	5.64787	51.4468	2.04986e-21	9.80537e-19	38.9067
ENSG00000234678.2	lncRNA	ELF3-AS1	2	OTTHUMG00000035865.2	chr1	HAVANA	gene	201995696	202010463	-	4.1893	5.40937	50.8207	2.56658e-21	1.13078e-18	38.7497
ENSG00000094804.12	protein_coding	CDC6	2	OTTHUMG00000133324.7	chr17	HAVANA	gene	40287879	40304657	+	-4.10568	5.52496	-50.3657	3.02737e-21	1.2362e-18	38.6416
ENSG00000183421.12	protein_coding	RIPK4	2	OTTHUMG00000086770.2	chr21	HAVANA	gene	41739369	41767089	-	2.68364	7.35552	49.4068	4.30798e-21	1.71724e-18	38.6361
ENSG00000013364.19	protein_coding	MVP	2	OTTHUMG00000048227.11	chr16	HAVANA	gene	29820394	29848039	+	2.24248	8.16666	49.1586	4.72509e-21	1.7979e-18	38.5352
ENSG00000142627.13	protein_coding	EPHA2	2	OTTHUMG00000009527.3	chr1	HAVANA	gene	16124337	16156069	-	-2.7091	7.26463	-48.9888	5.03493e-21	1.8325e-18	38.4798
ENSG00000110092.4	protein_coding	CCND1	1	OTTHUMG00000167877.4	chr11	HAVANA	gene	69641156	69654474	+	-4.14855	6.2578	-49.0499	4.92097e-21	1.83082e-18	38.3899
ENSG00000106211.10	protein_coding	HSPB1	2	OTTHUMG00000023228.4	chr7	HAVANA	gene	76302673	76304295	+	3.66639	6.51718	48.7604	5.48565e-21	1.95406e-18	38.3521
ENSG00000131746.13	protein_coding	TNS4	2	OTTHUMG00000133330.4	chr17	HAVANA	gene	40475828	40501623	-	-2.55836	8.05981	-48.4701	6.12078e-21	2.13488e-18	38.278
ENSG00000170477.13	protein_coding	KRT4	2	OTTHUMG00000169800.2	chr12	HAVANA	gene	52806549	52814116	-	4.99721	5.73587	49.1617	4.71962e-21	1.7979e-18	38.1805
ENSG00000186081.12	protein_coding	KRT5	2	OTTHUMG00000169657.4	chr12	HAVANA	gene	52514575	52520530	-	1.87131	12.2184	48.2644	6.61747e-21	2.26101e-18	38.0743
ENSG00000182481.10	protein_coding	KPNA2	2	OTTHUMG00000179784.3	chr17	HAVANA	gene	68035636	68047364	+	-2.2047	7.91437	-47.8982	7.60969e-21	2.54803e-18	38.0596
ENSG00000134107.5	protein_coding	BHLHE40	2	OTTHUMG00000119035.3	chr3	HAVANA	gene	4979437	4985323	+	2.4292	7.53376	47.8318	7.80589e-21	2.56248e-18	38.0404
ENSG00000166851.15	protein_coding	PLK1	2	OTTHUMG00000096984.6	chr16	HAVANA	gene	23677656	23690367	+	-2.93107	6.27125	-47.6354	8.4178e-21	2.66146e-18	37.933
ENSG00000109805.10	protein_coding	NCAPG	2	OTTHUMG00000128539.4	chr4	HAVANA	gene	17810979	17844865	+	-2.99712	6.0215	-47.633	8.42536e-21	2.66146e-18	37.9058
ENSG00000101057.16	protein_coding	MYBL2	2	OTTHUMG00000033062.2	chr20	HAVANA	gene	43667019	43716495	+	-2.57514	6.93311	-47.4573	9.01652e-21	2.79546e-18	37.8968
ENSG00000070814.22	protein_coding	TCOF1	1	OTTHUMG00000130081.18	chr5	HAVANA	gene	150357629	150400308	+	-2.23754	7.81455	-47.0256	1.06615e-20	3.18741e-18	37.7217
ENSG00000167996.16	protein_coding	FTH1	1	OTTHUMG00000166217.6	chr11	HAVANA	gene	61959718	61967634	-	1.80994	11.9426	47.0962	1.03719e-20	3.15721e-18	37.6167
ENSG00000010278.15	protein_coding	CD9	1	OTTHUMG00000044400.14	chr12	HAVANA	gene	6199715	6238271	+	1.98655	8.8937	46.7578	1.18385e-20	3.41724e-18	37.5855
ENSG00000173801.17	protein_coding	JUP	2	OTTHUMG00000133494.10	chr17	HAVANA	gene	41754604	41786931	-	1.90842	10.0338	46.7632	1.18133e-20	3.41724e-18	37.5508
ENSG00000163297.18	protein_coding	ANTXR2	2	OTTHUMG00000151982.4	chr4	HAVANA	gene	79901146	80125454	-	-2.696	7.35803	-46.5328	1.29329e-20	3.66988e-18	37.5368
ENSG00000134757.5	protein_coding	DSG3	2	OTTHUMG00000131985.4	chr18	HAVANA	gene	31447741	31478702	+	2.91145	6.98762	45.9887	1.6045e-20	4.47709e-18	37.3225
ENSG00000114554.12	protein_coding	PLXNA1	2	OTTHUMG00000044222.4	chr3	HAVANA	gene	126982693	127037389	+	-2.04753	8.6228	-45.91	1.65572e-20	4.52862e-18	37.253
ENSG00000175063.17	protein_coding	UBE2C	2	OTTHUMG00000033038.3	chr20	HAVANA	gene	45812576	45816957	+	-3.10595	6.1723	-45.7652	1.75441e-20	4.66226e-18	37.2023
ENSG00000013810.21	protein_coding	TACC3	1	OTTHUMG00000089535.25	chr4	HAVANA	gene	1712858	1745171	+	-2.86722	5.95827	-45.5339	1.9251e-20	5.00113e-18	37.1009
ENSG00000131747.15	protein_coding	TOP2A	1	OTTHUMG00000155008.4	chr17	HAVANA	gene	40388525	40417896	-	-2.9361	8.1184	-45.4748	1.97153e-20	5.00113e-18	37.0971
ENSG00000132646.11	protein_coding	PCNA	2	OTTHUMG00000031798.3	chr20	HAVANA	gene	5114953	5126626	-	-2.48327	7.00385	-45.3871	2.04247e-20	5.10374e-18	37.0811
ENSG00000100558.9	protein_coding	PLEK2	1	OTTHUMG00000171247.4	chr14	HAVANA	gene	67386984	67412167	-	-3.53449	5.6824	-45.5012	1.95062e-20	5.00113e-18	37.0141
ENSG00000076003.5	protein_coding	MCM6	2	OTTHUMG00000131739.3	chr2	HAVANA	gene	135839626	135876443	-	-2.78624	6.1361	-45.2341	2.17292e-20	5.34985e-18	36.9981
ENSG00000111206.13	protein_coding	FOXM1	2	OTTHUMG00000168118.2	chr12	HAVANA	gene	2857680	2877174	-	-2.27157	7.38434	-45.1321	2.26467e-20	5.49495e-18	36.9714
ENSG00000124466.9	protein_coding	LYPD3	2	OTTHUMG00000182696.3	chr19	HAVANA	gene	43460787	43465608	-	4.01455	5.12716	45.8779	1.67706e-20	4.52862e-18	36.9508
ENSG00000171346.16	protein_coding	KRT15	1	OTTHUMG00000133435.6	chr17	HAVANA	gene	41513745	41522529	-	2.597	7.17378	45.0594	2.33253e-20	5.57876e-18	36.9464
ENSG00000071539.14	protein_coding	TRIP13	1	OTTHUMG00000090349.28	chr5	HAVANA	gene	892884	919357	+	-2.97354	6.83036	-44.8973	2.49181e-20	5.79249e-18	36.8823
ENSG00000076382.17	protein_coding	SPAG5	2	OTTHUMG00000166586.27	chr17	HAVANA	gene	28577565	28599025	-	-2.74719	6.31037	-44.9151	2.47376e-20	5.79249e-18	36.8798
ENSG00000188229.6	protein_coding	TUBB4B	2	OTTHUMG00000131783.3	chr9	HAVANA	gene	137241287	137243707	+	-1.93565	9.08872	-44.8642	2.52569e-20	5.79249e-18	36.8066
ENSG00000087494.16	protein_coding	PTHLH	2	OTTHUMG00000169221.4	chr12	HAVANA	gene	27958084	27972733	-	-1.93772	9.00437	-44.4963	2.937e-20	6.64477e-18	36.6555
ENSG00000104267.10	protein_coding	CA2	2	OTTHUMG00000164944.3	chr8	HAVANA	gene	85463968	85481493	+	3.07525	6.46105	44.3506	3.11885e-20	6.96211e-18	36.6532
ENSG00000176619.13	protein_coding	LMNB2	2	OTTHUMG00000150626.7	chr19	HAVANA	gene	2427638	2456959	-	-1.94845	8.2693	-44.3095	3.17238e-20	6.98841e-18	36.6023
ENSG00000167325.15	protein_coding	RRM1	2	OTTHUMG00000133361.5	chr11	HAVANA	gene	4094707	4138932	+	-2.13607	7.58991	-44.1181	3.43417e-20	7.37114e-18	36.5449
ENSG00000137807.16	protein_coding	KIF23	1	OTTHUMG00000172062.8	chr15	HAVANA	gene	69414246	69448427	+	-2.95989	6.07043	-44.1257	3.42327e-20	7.37114e-18	36.5436
ENSG00000140525.20	protein_coding	FANCI	1	OTTHUMG00000132993.7	chr15	HAVANA	gene	89243945	89317261	+	-2.97445	5.85885	-44.0431	3.54279e-20	7.50803e-18	36.493
ENSG00000133816.19	protein_coding	MICAL2	1	OTTHUMG00000165744.9	chr11	HAVANA	gene	12094008	12359144	+	-2.46185	6.907	-43.9532	3.67792e-20	7.60195e-18	36.4925
ENSG00000113368.12	protein_coding	LMNB1	2	OTTHUMG00000128969.8	chr5	HAVANA	gene	126776623	126837020	+	-3.3652	5.61043	-43.9992	3.60809e-20	7.55083e-18	36.424
ENSG00000170312.17	protein_coding	CDK1	2	OTTHUMG00000018290.6	chr10	HAVANA	gene	60778331	60794852	+	-3.32303	5.8622	-43.754	3.99711e-20	8.16093e-18	36.362
ENSG00000148773.14	protein_coding	MKI67	2	OTTHUMG00000019255.2	chr10	HAVANA	gene	128096659	128126423	-	-2.76808	7.90304	-43.5667	4.3238e-20	8.72158e-18	36.3067
ENSG00000100297.16	protein_coding	MCM5	1	OTTHUMG00000150961.19	chr22	HAVANA	gene	35400134	35425431	+	-2.40434	6.49919	-43.424	4.59143e-20	9.15115e-18	36.272
ENSG00000054793.14	protein_coding	ATP9A	1	OTTHUMG00000032751.4	chr20	HAVANA	gene	51596514	51768390	-	2.37587	7.6435	43.3212	4.79506e-20	9.33476e-18	36.206
ENSG00000171401.15	protein_coding	KRT13	2	OTTHUMG00000133434.5	chr17	HAVANA	gene	41500981	41505705	-	4.19463	6.36045	43.2484	4.94505e-20	9.5161e-18	36.172
ENSG00000109685.19	protein_coding	NSD2	2	OTTHUMG00000121147.15	chr4	HAVANA	gene	1871393	1982207	+	-2.43602	6.60098	-43.1561	5.14245e-20	9.78351e-18	36.1589
ENSG00000276043.5	protein_coding	UHRF1	2	OTTHUMG00000180251.5	chr19	HAVANA	gene	4903080	4962154	+	-3.55767	5.28494	-43.3225	4.79246e-20	9.33476e-18	36.0704
ENSG00000169851.16	protein_coding	PCDH7	1	OTTHUMG00000160364.4	chr4	HAVANA	gene	30720369	31146805	+	1.95238	7.93563	42.7008	6.24467e-20	1.1747e-17	35.9239
ENSG00000101447.15	protein_coding	FAM83D	2	OTTHUMG00000032462.4	chr20	HAVANA	gene	38926312	38953106	+	-2.78357	6.1838	-42.2919	7.44727e-20	1.35524e-17	35.7846
ENSG00000124762.14	protein_coding	CDKN1A	2	OTTHUMG00000014603.4	chr6	HAVANA	gene	36676460	36687337	+	2.25999	6.68021	42.0457	8.28705e-20	1.47598e-17	35.6789
ENSG00000196517.13	protein_coding	SLC6A9	1	OTTHUMG00000008294.4	chr1	HAVANA	gene	43991500	44031467	-	3.01621	5.69046	41.9783	8.53406e-20	1.50215e-17	35.6217
ENSG00000156802.13	protein_coding	ATAD2	1	OTTHUMG00000165090.4	chr8	HAVANA	gene	123319850	123416350	-	-2.99763	5.97634	-41.8717	8.94068e-20	1.54314e-17	35.5928
ENSG00000112972.15	protein_coding	HMGCS1	2	OTTHUMG00000162231.3	chr5	HAVANA	gene	43287470	43313512	-	2.03092	9.33664	41.957	8.61347e-20	1.50215e-17	35.5405
ENSG00000087586.18	protein_coding	AURKA	2	OTTHUMG00000032796.7	chr20	HAVANA	gene	56369389	56392337	-	-2.64369	6.35285	-41.7202	9.55348e-20	1.6156e-17	35.5401
ENSG00000133030.22	protein_coding	MPRIP	1	OTTHUMG00000059276.11	chr17	HAVANA	gene	17042457	17217679	+	-2.12898	7.9494	-41.7959	9.24185e-20	1.57885e-17	35.5266
ENSG00000138160.7	protein_coding	KIF11	2	OTTHUMG00000018761.3	chr10	HAVANA	gene	92574105	92655395	+	-2.67184	6.39472	-41.6315	9.9329e-20	1.6465e-17	35.5013
ENSG00000143546.10	protein_coding	S100A8	2	OTTHUMG00000013124.3	chr1	HAVANA	gene	153390032	153391073	-	3.13206	5.90912	41.6535	9.83741e-20	1.6465e-17	35.4948
ENSG00000100292.18	protein_coding	HMOX1	2	OTTHUMG00000150960.4	chr22	HAVANA	gene	35380361	35394214	+	4.38355	5.00013	42.3436	7.28243e-20	1.33981e-17	35.4845
ENSG00000186185.14	protein_coding	KIF18B	1	OTTHUMG00000179867.2	chr17	HAVANA	gene	44924709	44947773	-	-3.9255	4.8746	-42.2582	7.55678e-20	1.36038e-17	35.4611
ENSG00000123384.14	protein_coding	LRP1	1	OTTHUMG00000044412.8	chr12	HAVANA	gene	57128483	57213361	+	2.5512	6.39672	41.4025	1.0988e-19	1.75201e-17	35.4003
ENSG00000130592.17	protein_coding	LSP1	1	OTTHUMG00000012252.24	chr11	HAVANA	gene	1850904	1892267	+	5.27484	5.11117	42.496	6.8189e-20	1.26847e-17	35.395
ENSG00000121152.10	protein_coding	NCAPH	1	OTTHUMG00000130451.6	chr2	HAVANA	gene	96335766	96377091	+	-3.16198	5.34645	-41.4086	1.09584e-19	1.75201e-17	35.3249
ENSG00000117984.15	protein_coding	CTSD	1	OTTHUMG00000044760.24	chr11	HAVANA	gene	1752752	1764573	-	1.87322	8.5366	41.4038	1.09817e-19	1.75201e-17	35.3236
ENSG00000176890.16	protein_coding	TYMS	1	OTTHUMG00000131473.7	chr18	HAVANA	gene	657653	673578	+	-3.00945	6.05412	-41.0659	1.27575e-19	1.99614e-17	35.245
ENSG00000186212.4	protein_coding	SOWAHB	2	OTTHUMG00000160876.2	chr4	HAVANA	gene	76894152	76898144	-	3.71271	4.86163	41.6016	1.00644e-19	1.65194e-17	35.2443
ENSG00000170581.15	protein_coding	STAT2	1	OTTHUMG00000170760.12	chr12	HAVANA	gene	56341597	56360203	-	2.22373	6.57758	40.9673	1.33308e-19	2.0513e-17	35.2026
ENSG00000082516.9	protein_coding	GEMIN5	2	OTTHUMG00000130189.3	chr5	HAVANA	gene	154887411	154938211	-	-2.16975	6.77574	-40.9262	1.35781e-19	2.06658e-17	35.1799
ENSG00000110042.8	protein_coding	DTX4	2	OTTHUMG00000167336.3	chr11	HAVANA	gene	59171430	59208588	+	2.08575	7.34275	40.9633	1.33552e-19	2.0513e-17	35.1751
ENSG00000147883.12	protein_coding	CDKN2B	2	OTTHUMG00000019691.4	chr9	HAVANA	gene	22002903	22009305	-	4.06781	5.13647	41.0957	1.25897e-19	1.98845e-17	35.0744
ENSG00000114270.18	protein_coding	COL7A1	2	OTTHUMG00000133541.3	chr3	HAVANA	gene	48564073	48595329	-	2.21929	7.37215	40.7152	1.49245e-19	2.25104e-17	35.0625
ENSG00000134317.18	protein_coding	GRHL1	2	OTTHUMG00000151704.8	chr2	HAVANA	gene	9951693	10002277	+	2.97544	5.43273	40.6266	1.55312e-19	2.32164e-17	35.0137
ENSG00000138180.16	protein_coding	CEP55	2	OTTHUMG00000018774.2	chr10	HAVANA	gene	93496612	93529092	+	-2.59217	5.95403	-40.441	1.68875e-19	2.50204e-17	34.9683
ENSG00000076248.12	protein_coding	UNG	2	OTTHUMG00000169247.1	chr12	HAVANA	gene	109097597	109126725	+	-2.50882	6.00008	-40.0471	2.01975e-19	2.9662e-17	34.7916
ENSG00000153292.16	protein_coding	ADGRF1	2	OTTHUMG00000014795.3	chr6	HAVANA	gene	46997708	47042350	-	2.13422	6.86795	39.9924	2.07087e-19	3.01482e-17	34.7491
ENSG00000169242.12	protein_coding	EFNA1	2	OTTHUMG00000035312.3	chr1	HAVANA	gene	155127876	155134899	+	3.1014	5.57388	39.9037	2.15667e-19	3.11267e-17	34.7015
ENSG00000135842.17	protein_coding	NIBAN1	2	OTTHUMG00000035388.3	chr1	HAVANA	gene	184790724	184974508	-	3.1868	6.23377	39.819	2.24205e-19	3.18104e-17	34.6879
ENSG00000130066.17	protein_coding	SAT1	2	OTTHUMG00000021256.1	chrX	HAVANA	gene	23783173	23786210	+	2.27447	7.11728	39.8577	2.20264e-19	3.15184e-17	34.6785
ENSG00000116062.19	protein_coding	MSH6	2	OTTHUMG00000129129.13	chr2	HAVANA	gene	47695530	47810063	+	-2.25153	6.45833	-39.7929	2.26909e-19	3.19237e-17	34.6711
ENSG00000130816.17	protein_coding	DNMT1	1	OTTHUMG00000180397.4	chr19	HAVANA	gene	10133342	10231286	-	-1.91912	7.55733	-39.6398	2.4347e-19	3.39681e-17	34.5542
ENSG00000117595.13	protein_coding	IRF6	2	OTTHUMG00000036521.4	chr1	HAVANA	gene	209785617	209806175	-	2.01986	7.17944	39.4582	2.64796e-19	3.63378e-17	34.4859
ENSG00000237649.8	protein_coding	KIFC1	2	OTTHUMG00000031209.5	chr6	HAVANA	gene	33391823	33409896	+	-2.95789	5.61856	-39.3386	2.79903e-19	3.79796e-17	34.4494
ENSG00000112759.19	protein_coding	SLC29A1	2	OTTHUMG00000014759.5	chr6	HAVANA	gene	44219553	44234142	+	-2.45022	5.87385	-39.2659	2.89524e-19	3.86027e-17	34.4318
ENSG00000156970.13	protein_coding	BUB1B	2	OTTHUMG00000129877.4	chr15	HAVANA	gene	40161023	40221123	+	-3.29715	5.33831	-39.3279	2.81297e-19	3.79796e-17	34.4043
ENSG00000148180.22	protein_coding	GSN	2	OTTHUMG00000020584.8	chr9	HAVANA	gene	121207794	121332843	+	2.10437	6.69612	39.1412	3.06852e-19	4.04513e-17	34.3571
ENSG00000176945.18	protein_coding	MUC20	1	OTTHUMG00000155823.4	chr3	HAVANA	gene	195720884	195741123	+	4.23489	5.51402	39.2585	2.90523e-19	3.86027e-17	34.3475
ENSG00000089685.15	protein_coding	BIRC5	2	OTTHUMG00000177505.9	chr17	HAVANA	gene	78214186	78225636	+	-2.76495	5.99214	-38.9725	3.32053e-19	4.27633e-17	34.2954
ENSG00000161800.13	protein_coding	RACGAP1	1	OTTHUMG00000169811.7	chr12	HAVANA	gene	49976923	50033136	-	-2.10428	6.58808	-38.9802	3.30854e-19	4.27633e-17	34.2859
ENSG00000123240.17	protein_coding	OPTN	2	OTTHUMG00000017690.6	chr10	HAVANA	gene	13099449	13138308	+	2.21435	6.84283	38.9795	3.30963e-19	4.27633e-17	34.276
ENSG00000120802.14	protein_coding	TMPO	1	OTTHUMG00000170210.4	chr12	HAVANA	gene	98515579	98550351	+	-2.63909	7.34964	-38.9237	3.39733e-19	4.34184e-17	34.2341
ENSG00000126787.13	protein_coding	DLGAP5	1	OTTHUMG00000140310.3	chr14	HAVANA	gene	55148112	55191608	-	-2.68441	6.04157	-38.7023	3.77059e-19	4.78237e-17	34.169
ENSG00000145604.17	protein_coding	SKP2	2	OTTHUMG00000131106.9	chr5	HAVANA	gene	36151989	36196849	+	-2.18007	6.46011	-38.6232	3.91416e-19	4.92713e-17	34.1211
ENSG00000139112.11	protein_coding	GABARAPL1	2	OTTHUMG00000168411.10	chr12	HAVANA	gene	10212458	10223128	+	2.48889	5.89398	38.358	4.43906e-19	5.50509e-17	34.006
ENSG00000113810.16	protein_coding	SMC4	1	OTTHUMG00000159006.8	chr3	HAVANA	gene	160399274	160434954	+	-2.33226	7.43286	-38.2552	4.66216e-19	5.69736e-17	33.9031
ENSG00000082074.19	protein_coding	FYB1	2	OTTHUMG00000162071.10	chr5	HAVANA	gene	39105252	39274528	-	2.00307	8.51034	38.3249	4.50975e-19	5.55163e-17	33.8769
ENSG00000178202.14	protein_coding	POGLUT3	1	OTTHUMG00000166535.2	chr11	HAVANA	gene	108472112	108498405	-	-2.44007	5.86272	-38.0323	5.18724e-19	6.15914e-17	33.8504
ENSG00000099901.18	protein_coding	RANBP1	1	OTTHUMG00000150490.35	chr22	HAVANA	gene	20115938	20127355	+	-1.91924	7.82742	-38.1804	4.83184e-19	5.81977e-17	33.8405
ENSG00000177169.10	protein_coding	ULK1	2	OTTHUMG00000168052.6	chr12	HAVANA	gene	131894622	131923150	+	2.40045	6.28512	37.9299	5.44907e-19	6.29161e-17	33.7936
ENSG00000112378.12	protein_coding	PERP	2	OTTHUMG00000015668.3	chr6	HAVANA	gene	138088505	138107419	-	2.17925	10.0993	38.2186	4.74424e-19	5.75566e-17	33.7496
ENSG00000075618.18	protein_coding	FSCN1	1	OTTHUMG00000090599.6	chr7	HAVANA	gene	5592816	5606655	+	-1.63	9.37865	-38.1524	4.89695e-19	5.85605e-17	33.7492
ENSG00000021355.13	protein_coding	SERPINB1	2	OTTHUMG00000014124.2	chr6	HAVANA	gene	2832332	2841959	-	2.0222	8.26907	38.0104	5.24197e-19	6.15914e-17	33.7344
ENSG00000100401.21	protein_coding	RANGAP1	2	OTTHUMG00000150940.12	chr22	HAVANA	gene	41244779	41286187	-	-1.69401	8.05839	-37.9885	5.29755e-19	6.15914e-17	33.7324
ENSG00000272398.6	protein_coding	CD24	2	OTTHUMG00000188439.3	chr6	HAVANA	gene	106969831	106975627	-	2.44842	8.72102	37.9947	5.28164e-19	6.15914e-17	33.7075
ENSG00000112984.12	protein_coding	KIF20A	2	OTTHUMG00000129195.4	chr5	HAVANA	gene	138178719	138187723	+	-2.60082	6.522	-37.7527	5.93548e-19	6.75999e-17	33.7031
ENSG00000165272.16	protein_coding	AQP3	2	OTTHUMG00000019769.5	chr9	HAVANA	gene	33441156	33447596	-	2.20942	8.83636	37.886	5.56543e-19	6.38195e-17	33.6461
ENSG00000185567.7	protein_coding	AHNAK2	1	OTTHUMG00000170765.2	chr14	HAVANA	gene	104937244	104978374	-	2.75619	6.49976	37.621	6.32634e-19	7.10843e-17	33.6399
ENSG00000104419.17	protein_coding	NDRG1	1	OTTHUMG00000164441.4	chr8	HAVANA	gene	133237175	133302022	-	2.30464	6.35006	37.5096	6.67828e-19	7.45385e-17	33.5855
ENSG00000205420.11	protein_coding	KRT6A	2	OTTHUMG00000169597.3	chr12	HAVANA	gene	52487176	52493257	-	1.90955	7.53634	37.6318	6.29325e-19	7.10843e-17	33.5838
ENSG00000118515.12	protein_coding	SGK1	2	OTTHUMG00000015613.5	chr6	HAVANA	gene	134169248	134318112	-	2.14803	6.68569	37.4947	6.72682e-19	7.4583e-17	33.5627
ENSG00000137745.13	protein_coding	MMP13	1	OTTHUMG00000165850.3	chr11	HAVANA	gene	102942995	102955732	-	7.07976	4.9804	39.6211	2.45585e-19	3.39801e-17	33.522
ENSG00000100749.9	protein_coding	VRK1	2	OTTHUMG00000171459.2	chr14	HAVANA	gene	96797304	96954846	+	-2.75162	5.27816	-37.229	7.65954e-19	8.27329e-17	33.4419
ENSG00000123485.12	protein_coding	HJURP	2	OTTHUMG00000059125.12	chr2	HAVANA	gene	233833416	233854566	-	-3.61208	4.78824	-37.4513	6.87065e-19	7.56765e-17	33.4166
ENSG00000145386.11	protein_coding	CCNA2	2	OTTHUMG00000133072.4	chr4	HAVANA	gene	121816444	121823883	-	-3.23525	5.2488	-37.1415	7.99553e-19	8.58085e-17	33.3807
ENSG00000163347.6	protein_coding	CLDN1	2	OTTHUMG00000156214.3	chr3	HAVANA	gene	190305707	190322446	-	2.25227	10.311	37.3936	7.06681e-19	7.73285e-17	33.3277
ENSG00000080824.19	protein_coding	HSP90AA1	2	OTTHUMG00000171752.7	chr14	HAVANA	gene	102080742	102139699	-	-1.44842	10.6204	-37.3763	7.12678e-19	7.74782e-17	33.3003
ENSG00000132357.14	protein_coding	CARD6	1	OTTHUMG00000094775.9	chr5	HAVANA	gene	40841308	40860175	+	2.01035	6.47693	36.9431	8.81633e-19	9.34196e-17	33.296
ENSG00000143217.9	protein_coding	NECTIN4	2	OTTHUMG00000031475.2	chr1	HAVANA	gene	161070998	161089558	-	3.08868	5.12035	36.8581	9.19501e-19	9.62143e-17	33.2419
ENSG00000168016.15	protein_coding	TRANK1	1	OTTHUMG00000155848.6	chr3	HAVANA	gene	36826819	36945057	-	3.30634	4.98455	36.8065	9.43303e-19	9.80918e-17	33.1888
ENSG00000161011.20	protein_coding	SQSTM1	2	OTTHUMG00000150643.80	chr5	HAVANA	gene	179806398	179838078	+	1.43066	9.88776	37.0601	8.32211e-19	8.87444e-17	33.1756
ENSG00000186591.13	protein_coding	UBE2H	1	OTTHUMG00000157650.7	chr7	HAVANA	gene	129830732	129952960	-	1.60188	8.41613	36.8844	9.07616e-19	9.5568e-17	33.1597
ENSG00000178999.13	protein_coding	AURKB	1	OTTHUMG00000108189.6	chr17	HAVANA	gene	8204733	8210600	-	-3.39883	4.99906	-36.7486	9.70789e-19	1.00327e-16	33.1503
ENSG00000111665.12	protein_coding	CDCA3	1	OTTHUMG00000169014.2	chr12	HAVANA	gene	6844793	6851292	-	-3.08964	5.51502	-36.5273	1.08389e-18	1.10649e-16	33.1061
ENSG00000132780.17	protein_coding	NASP	1	OTTHUMG00000007826.5	chr1	HAVANA	gene	45583846	45618904	+	-1.87716	6.98991	-36.5644	1.06402e-18	1.09288e-16	33.0788
ENSG00000065308.5	protein_coding	TRAM2	2	OTTHUMG00000014850.2	chr6	HAVANA	gene	52497408	52577060	-	-2.02521	6.62356	-36.4195	1.14394e-18	1.16071e-16	33.0265
ENSG00000160213.10	protein_coding	CSTB	2	OTTHUMG00000086886.6	chr21	HAVANA	gene	43772511	43776330	-	1.8893	7.3378	36.3886	1.16177e-18	1.16926e-16	32.9674
ENSG00000136689.20	protein_coding	IL1RN	1	OTTHUMG00000131341.2	chr2	HAVANA	gene	113099315	113134016	+	3.11679	5.0097	36.2818	1.22576e-18	1.2001e-16	32.9478
ENSG00000169245.6	protein_coding	CXCL10	2	OTTHUMG00000160887.3	chr4	HAVANA	gene	76021118	76023497	-	5.81181	4.19634	38.575	4.00448e-19	5.0032e-17	32.9453
ENSG00000169607.13	protein_coding	CKAP2L	2	OTTHUMG00000131313.3	chr2	HAVANA	gene	112736349	112764664	-	-3.13021	4.94511	-36.2842	1.22432e-18	1.2001e-16	32.9335
ENSG00000113569.16	protein_coding	NUP155	2	OTTHUMG00000090803.4	chr5	HAVANA	gene	37288137	37371106	-	-1.80229	8.04508	-36.3808	1.16633e-18	1.16926e-16	32.9238
ENSG00000115919.15	protein_coding	KYNU	1	OTTHUMG00000131829.6	chr2	HAVANA	gene	142877657	143055833	+	1.58323	8.54541	36.357	1.18037e-18	1.16933e-16	32.8825
ENSG00000118193.12	protein_coding	KIF14	2	OTTHUMG00000035723.2	chr1	HAVANA	gene	200551497	200620751	-	-3.05217	5.27037	-36.0804	1.35677e-18	1.30547e-16	32.8712
ENSG00000078124.13	protein_coding	ACER3	2	OTTHUMG00000165225.4	chr11	HAVANA	gene	76860859	77026797	+	-2.98596	5.69823	-36.0396	1.38501e-18	1.32042e-16	32.869
ENSG00000105011.9	protein_coding	ASF1B	2	OTTHUMG00000150401.3	chr19	HAVANA	gene	14119512	14136613	-	-3.34351	4.96672	-36.1637	1.30086e-18	1.26623e-16	32.8657
ENSG00000140859.16	protein_coding	KIFC3	1	OTTHUMG00000133455.20	chr16	HAVANA	gene	57758217	57863053	-	-2.73242	5.45516	-35.985	1.42387e-18	1.33176e-16	32.8387
ENSG00000065361.17	protein_coding	ERBB3	2	OTTHUMG00000170140.8	chr12	HAVANA	gene	56076799	56103505	+	2.1933	6.64128	36.0147	1.4026e-18	1.32042e-16	32.819
ENSG00000113460.13	protein_coding	BRIX1	2	OTTHUMG00000162021.3	chr5	HAVANA	gene	34915677	34925996	+	-1.88828	7.48679	-36.0992	1.34396e-18	1.30061e-16	32.8112
ENSG00000169474.5	protein_coding	SPRR1A	2	OTTHUMG00000014404.2	chr1	HAVANA	gene	152984081	152985814	+	2.90106	5.16888	35.9554	1.44542e-18	1.3444e-16	32.8092
ENSG00000111445.14	protein_coding	RFC5	2	OTTHUMG00000156438.5	chr12	HAVANA	gene	118013588	118033130	+	-2.6751	5.36409	-35.9026	1.48463e-18	1.3657e-16	32.7949
ENSG00000131153.9	protein_coding	GINS2	1	OTTHUMG00000137646.4	chr16	HAVANA	gene	85676198	85690073	-	-3.7768	4.48148	-36.3646	1.17585e-18	1.16933e-16	32.7941
ENSG00000162511.8	protein_coding	LAPTM5	2	OTTHUMG00000003707.2	chr1	HAVANA	gene	30732469	30757774	-	-2.56021	5.50319	-35.8826	1.49982e-18	1.36873e-16	32.7892
ENSG00000120337.10	protein_coding	TNFSF18	2	OTTHUMG00000034835.2	chr1	HAVANA	gene	173039202	173050941	-	-3.40049	5.32647	-35.9142	1.47593e-18	1.3652e-16	32.7822
ENSG00000167513.9	protein_coding	CDT1	2	OTTHUMG00000173467.3	chr16	HAVANA	gene	88803789	88809258	+	-3.02002	5.05637	-35.8768	1.50428e-18	1.36873e-16	32.7527
ENSG00000130707.18	protein_coding	ASS1	2	OTTHUMG00000020806.5	chr9	HAVANA	gene	130444961	130501274	+	1.83486	7.722	36.0172	1.40084e-18	1.32042e-16	32.7527
ENSG00000151651.16	protein_coding	ADAM8	1	OTTHUMG00000019309.7	chr10	HAVANA	gene	133262420	133276868	-	-2.90549	5.6124	-35.7569	1.59891e-18	1.41635e-16	32.7254
ENSG00000160285.15	protein_coding	LSS	1	OTTHUMG00000090633.10	chr21	HAVANA	gene	46188141	46228824	-	2.08108	6.30981	35.7616	1.59507e-18	1.41635e-16	32.7035
ENSG00000149527.18	protein_coding	PLCH2	2	OTTHUMG00000000719.6	chr1	HAVANA	gene	2425980	2505532	+	-2.47612	6.50798	-35.7459	1.60793e-18	1.41684e-16	32.6933
ENSG00000157514.18	protein_coding	TSC22D3	2	OTTHUMG00000022168.3	chrX	HAVANA	gene	107713221	107777342	-	2.8387	4.95161	35.7084	1.63901e-18	1.43667e-16	32.6695
ENSG00000136156.15	protein_coding	ITM2B	1	OTTHUMG00000016894.6	chr13	HAVANA	gene	48232612	48270357	+	1.69288	8.83074	35.7942	1.56883e-18	1.4062e-16	32.575
ENSG00000107438.9	protein_coding	PDLIM1	2	OTTHUMG00000018810.2	chr10	HAVANA	gene	95237572	95291012	-	1.5305	9.69442	35.8608	1.51654e-18	1.37243e-16	32.565
ENSG00000198554.12	protein_coding	WDHD1	2	OTTHUMG00000140304.9	chr14	HAVANA	gene	54938949	55027105	-	-3.0166	5.14473	-35.4794	1.84299e-18	1.59872e-16	32.562
ENSG00000133119.13	protein_coding	RFC3	2	OTTHUMG00000016715.4	chr13	HAVANA	gene	33818069	33966558	+	-3.18193	5.01615	-35.4846	1.83802e-18	1.59872e-16	32.5455
ENSG00000145220.14	protein_coding	LYAR	2	OTTHUMG00000125477.20	chr4	HAVANA	gene	4267701	4290154	-	-2.68346	5.16636	-35.4008	1.91897e-18	1.63915e-16	32.5322
ENSG00000088367.23	protein_coding	EPB41L1	2	OTTHUMG00000032378.14	chr20	HAVANA	gene	36091504	36232799	+	2.09085	6.62793	35.4456	1.87522e-18	1.61569e-16	32.5227
ENSG00000089723.10	protein_coding	OTUB2	2	OTTHUMG00000171300.2	chr14	HAVANA	gene	94026340	94048930	+	-3.34483	5.14078	-35.3828	1.93685e-18	1.64307e-16	32.5013
ENSG00000169679.15	protein_coding	BUB1	2	OTTHUMG00000153638.6	chr2	HAVANA	gene	110637528	110678063	-	-2.7121	5.64134	-35.172	2.15976e-18	1.81702e-16	32.426
ENSG00000140465.15	protein_coding	CYP1A1	1	OTTHUMG00000142812.5	chr15	HAVANA	gene	74719542	74725536	-	4.40515	4.23661	36.013	1.40386e-18	1.32042e-16	32.4194
ENSG00000158055.17	protein_coding	GRHL3	2	OTTHUMG00000003040.6	chr1	HAVANA	gene	24199558	24364482	+	2.796	5.11646	35.1525	2.18163e-18	1.82006e-16	32.4031
ENSG00000221968.9	protein_coding	FADS3	1	OTTHUMG00000167500.5	chr11	HAVANA	gene	61873519	61892051	-	1.64057	8.12753	35.3765	1.94319e-18	1.64307e-16	32.3916
ENSG00000131069.20	protein_coding	ACSS2	2	OTTHUMG00000032317.9	chr20	HAVANA	gene	34872146	34927962	+	2.19622	5.83863	35.1042	2.23702e-18	1.85407e-16	32.3826
ENSG00000164104.12	protein_coding	HMGB2	2	OTTHUMG00000160799.3	chr4	HAVANA	gene	173331376	173334432	-	-2.97726	5.43981	-35.0359	2.31781e-18	1.91156e-16	32.3523
ENSG00000167656.5	protein_coding	LY6D	2	OTTHUMG00000164693.2	chr8	HAVANA	gene	142784882	142786539	-	2.65927	8.89524	35.1494	2.18512e-18	1.82006e-16	32.2368
ENSG00000010292.13	protein_coding	NCAPD2	1	OTTHUMG00000168513.3	chr12	HAVANA	gene	6493356	6531955	+	-1.53063	8.92678	-34.8847	2.50787e-18	2.05817e-16	32.0854
ENSG00000135925.9	protein_coding	WNT10A	1	OTTHUMG00000133085.4	chr2	HAVANA	gene	218880852	218899581	+	3.1789	4.66563	34.6479	2.83928e-18	2.30754e-16	32.0813
ENSG00000189057.11	protein_coding	FAM111B	2	OTTHUMG00000167279.5	chr11	HAVANA	gene	59107185	59127412	+	-3.85665	4.78431	-34.7227	2.72979e-18	2.22937e-16	32.0774
ENSG00000162063.13	protein_coding	CCNF	2	OTTHUMG00000128858.3	chr16	HAVANA	gene	2429394	2458854	+	-2.93151	4.9724	-34.5462	2.99545e-18	2.41105e-16	32.0741
ENSG00000146918.20	protein_coding	NCAPG2	2	OTTHUMG00000151438.5	chr7	HAVANA	gene	158631169	158704804	-	-2.37309	5.63803	-34.4759	3.10863e-18	2.47832e-16	32.0598
ENSG00000188112.10	protein_coding	C6orf132	1	OTTHUMG00000014695.5	chr6	HAVANA	gene	42092233	42142620	-	1.66431	7.41332	34.575	2.95023e-18	2.38613e-16	32.0045
ENSG00000065328.17	protein_coding	MCM10	2	OTTHUMG00000017694.3	chr10	HAVANA	gene	13161558	13211110	+	-4.51457	4.08271	-35.4388	1.88186e-18	1.61569e-16	32.0035
ENSG00000173402.13	protein_coding	DAG1	2	OTTHUMG00000156869.11	chr3	HAVANA	gene	49468713	49535618	+	1.46316	9.00531	34.5091	3.05452e-18	2.44683e-16	31.8764
ENSG00000100906.12	protein_coding	NFKBIA	1	OTTHUMG00000140220.4	chr14	HAVANA	gene	35401079	35404749	-	1.79597	7.02753	34.2868	3.43614e-18	2.71358e-16	31.8751
ENSG00000101361.17	protein_coding	NOP56	2	OTTHUMG00000031703.9	chr20	HAVANA	gene	2652593	2658393	+	-1.82776	7.44058	-34.2603	3.48489e-18	2.73915e-16	31.8357
ENSG00000186193.9	protein_coding	SAPCD2	2	OTTHUMG00000020961.4	chr9	HAVANA	gene	137062127	137070557	-	-2.40357	5.39545	-33.9823	4.04223e-18	3.09018e-16	31.8001
ENSG00000167670.16	protein_coding	CHAF1A	1	OTTHUMG00000181922.6	chr19	HAVANA	gene	4402640	4445018	+	-2.68109	5.58474	-33.9835	4.03962e-18	3.09018e-16	31.7999
ENSG00000087266.17	protein_coding	SH3BP2	2	OTTHUMG00000160801.18	chr4	HAVANA	gene	2793071	2841098	+	2.26017	6.4372	34.055	3.88786e-18	2.99957e-16	31.7941
ENSG00000189403.15	protein_coding	HMGB1	2	OTTHUMG00000016670.8	chr13	HAVANA	gene	30456704	30617597	-	-1.55236	8.00252	-34.2021	3.5944e-18	2.79895e-16	31.7655
ENSG00000188486.4	protein_coding	H2AX	2	OTTHUMG00000166196.4	chr11	HAVANA	gene	119093874	119095465	-	-2.66203	5.76218	-33.9009	4.22253e-18	3.1988e-16	31.7513
ENSG00000125148.7	protein_coding	MT2A	2	OTTHUMG00000133281.3	chr16	HAVANA	gene	56608584	56609497	+	-1.82999	8.79585	-34.2033	3.59221e-18	2.79895e-16	31.723
ENSG00000164045.12	protein_coding	CDC25A	2	OTTHUMG00000133535.6	chr3	HAVANA	gene	48157146	48188417	-	-3.88532	4.30227	-34.2985	3.4148e-18	2.70951e-16	31.7193
ENSG00000099250.18	protein_coding	NRP1	2	OTTHUMG00000019343.8	chr10	HAVANA	gene	33177492	33336262	-	-2.16579	5.95679	-33.8669	4.30044e-18	3.24315e-16	31.7188
ENSG00000129116.20	protein_coding	PALLD	1	OTTHUMG00000161097.11	chr4	HAVANA	gene	168497052	168928457	+	1.88276	6.84332	33.9529	4.10627e-18	3.12487e-16	31.7062
ENSG00000105856.14	protein_coding	HBP1	2	OTTHUMG00000157642.5	chr7	HAVANA	gene	107168961	107202522	+	2.30948	5.3934	33.8043	4.44766e-18	3.33913e-16	31.7039
ENSG00000197451.12	protein_coding	HNRNPAB	2	OTTHUMG00000163452.2	chr5	HAVANA	gene	178204533	178211163	+	-1.74661	8.119	-34.0957	3.80431e-18	2.94869e-16	31.7019
ENSG00000122966.18	protein_coding	CIT	1	OTTHUMG00000134325.9	chr12	HAVANA	gene	119685791	119877320	-	-2.49029	5.3871	-33.7043	4.69411e-18	3.47738e-16	31.6509
ENSG00000172818.10	protein_coding	OVOL1	2	OTTHUMG00000166600.2	chr11	HAVANA	gene	65787063	65797214	+	3.02522	4.7566	33.7211	4.65166e-18	3.46125e-16	31.6229
ENSG00000177084.19	protein_coding	POLE	1	OTTHUMG00000168045.7	chr12	HAVANA	gene	132623753	132687376	-	-2.47727	5.45397	-33.5976	4.97308e-18	3.65172e-16	31.5925
ENSG00000157456.8	protein_coding	CCNB2	1	OTTHUMG00000132715.3	chr15	HAVANA	gene	59105126	59125045	+	-2.21565	6.15871	-33.6279	4.89207e-18	3.60806e-16	31.5782
ENSG00000122952.17	protein_coding	ZWINT	2	OTTHUMG00000018261.3	chr10	HAVANA	gene	56357227	56361273	-	-2.54563	5.36719	-33.5548	5.08987e-18	3.7027e-16	31.5701
ENSG00000213551.7	protein_coding	DNAJC9	2	OTTHUMG00000196006.1	chr10	HAVANA	gene	73183362	73247255	-	-2.11852	5.75955	-33.5594	5.07703e-18	3.7027e-16	31.5593
ENSG00000176092.17	protein_coding	CRYBG2	1	OTTHUMG00000003490.10	chr1	HAVANA	gene	26321698	26360080	-	3.06984	4.74474	33.5479	5.10886e-18	3.7027e-16	31.5282
ENSG00000111540.16	protein_coding	RAB5B	1	OTTHUMG00000169682.4	chr12	HAVANA	gene	55973913	55996683	+	1.87155	6.92951	33.5061	5.22618e-18	3.77141e-16	31.4532
ENSG00000175793.12	protein_coding	SFN	2	OTTHUMG00000004093.2	chr1	HAVANA	gene	26863149	26864456	+	1.41596	10.4161	33.7349	4.61724e-18	3.45097e-16	31.3724
ENSG00000178921.14	protein_coding	PFAS	2	OTTHUMG00000108188.5	chr17	HAVANA	gene	8247618	8270491	+	-2.04192	5.84027	-33.2237	6.09623e-18	4.36167e-16	31.3695
ENSG00000142945.13	protein_coding	KIF2C	2	OTTHUMG00000008416.7	chr1	HAVANA	gene	44739818	44767767	+	-2.9453	5.32134	-33.0845	6.58016e-18	4.64831e-16	31.3131
ENSG00000012048.25	protein_coding	BRCA1	2	OTTHUMG00000157426.16	chr17	HAVANA	gene	43044295	43170245	-	-2.62866	5.62099	-33.0731	6.6216e-18	4.65793e-16	31.3029
ENSG00000087258.16	protein_coding	GNAO1	1	OTTHUMG00000133241.11	chr16	HAVANA	gene	56191390	56357444	+	6.38281	3.95712	35.7919	1.57066e-18	1.4062e-16	31.2611
ENSG00000162337.12	protein_coding	LRP5	1	OTTHUMG00000167570.2	chr11	HAVANA	gene	68312591	68449275	+	-2.31053	5.82056	-33.0093	6.85818e-18	4.76571e-16	31.2553
ENSG00000159176.14	protein_coding	CSRP1	2	OTTHUMG00000035773.6	chr1	HAVANA	gene	201483530	201509456	-	-1.66503	6.99726	-33.1616	6.30727e-18	4.47442e-16	31.2543
ENSG00000127954.13	protein_coding	STEAP4	2	OTTHUMG00000153853.7	chr7	HAVANA	gene	88270892	88306894	-	3.43584	4.81342	33.0088	6.8602e-18	4.76571e-16	31.2323
ENSG00000159403.18	protein_coding	C1R	1	OTTHUMG00000168149.10	chr12	HAVANA	gene	7080214	7092540	-	3.47719	4.26873	33.2122	6.13469e-18	4.37051e-16	31.2314
ENSG00000161642.18	protein_coding	ZNF385A	2	OTTHUMG00000169840.2	chr12	HAVANA	gene	54369133	54391298	-	2.02105	6.50541	33.0343	6.76436e-18	4.73845e-16	31.2207
ENSG00000108106.14	protein_coding	UBE2S	1	OTTHUMG00000180811.5	chr19	HAVANA	gene	55399745	55407788	-	-2.646	6.31882	-32.9563	7.06173e-18	4.87577e-16	31.2038
ENSG00000040275.17	protein_coding	SPDL1	1	OTTHUMG00000130438.7	chr5	HAVANA	gene	169583636	169604778	+	-2.42744	5.20346	-32.861	7.44365e-18	5.06592e-16	31.1907
ENSG00000134690.11	protein_coding	CDCA8	2	OTTHUMG00000004320.2	chr1	HAVANA	gene	37692481	37709719	+	-3.21218	4.88742	-32.873	7.39427e-18	5.05285e-16	31.1714
ENSG00000179604.10	protein_coding	CDC42EP4	1	OTTHUMG00000178419.3	chr17	HAVANA	gene	73283624	73312005	-	2.19424	6.26735	32.9012	7.2798e-18	4.99502e-16	31.1648
ENSG00000096696.16	protein_coding	DSP	2	OTTHUMG00000014212.5	chr6	HAVANA	gene	7541338	7586714	+	1.41927	10.0338	33.2807	5.90891e-18	4.24579e-16	31.1371
ENSG00000185650.10	protein_coding	ZFP36L1	1	OTTHUMG00000171385.4	chr14	HAVANA	gene	68787660	68796253	-	-1.70234	7.27703	-32.9524	7.07689e-18	4.87577e-16	31.1169
ENSG00000198826.11	protein_coding	ARHGAP11A	1	OTTHUMG00000129289.4	chr15	HAVANA	gene	32615144	32639941	+	-3.00085	5.26072	-32.7071	8.10703e-18	5.40748e-16	31.1043
ENSG00000137812.21	protein_coding	KNL1	2	OTTHUMG00000166532.6	chr15	HAVANA	gene	40594020	40664342	+	-2.64035	5.49813	-32.6185	8.51664e-18	5.65816e-16	31.0534
ENSG00000164649.20	protein_coding	CDCA7L	1	OTTHUMG00000128429.8	chr7	HAVANA	gene	21900899	21945903	-	-1.96158	6.4796	-32.7247	8.02791e-18	5.37613e-16	31.0487
ENSG00000128944.14	protein_coding	KNSTRN	2	OTTHUMG00000172454.3	chr15	HAVANA	gene	40382721	40394288	+	-2.53997	5.17277	-32.5568	8.81494e-18	5.81022e-16	31.0218
ENSG00000136542.9	protein_coding	GALNT5	1	OTTHUMG00000131965.3	chr2	HAVANA	gene	157257705	157318491	+	1.88604	7.11055	32.7531	7.90241e-18	5.33477e-16	31.0165
ENSG00000146411.6	protein_coding	SLC2A12	2	OTTHUMG00000015611.2	chr6	HAVANA	gene	133987581	134052624	-	2.9698	5.18407	32.5373	8.91163e-18	5.82807e-16	31.0099
ENSG00000013297.12	protein_coding	CLDN11	1	OTTHUMG00000158940.4	chr3	HAVANA	gene	170418868	170454733	+	-2.69269	5.24601	-32.4771	9.21699e-18	6.00431e-16	30.9774
ENSG00000127824.15	protein_coding	TUBA4A	1	OTTHUMG00000133126.7	chr2	HAVANA	gene	219249710	219277902	-	-1.98551	6.22869	-32.5399	8.89879e-18	5.82807e-16	30.9611
ENSG00000124207.17	protein_coding	CSE1L	2	OTTHUMG00000033046.4	chr20	HAVANA	gene	49046246	49096960	+	-1.65498	8.79476	-32.8278	7.58163e-18	5.13893e-16	30.9494
ENSG00000163220.11	protein_coding	S100A9	2	OTTHUMG00000013125.2	chr1	HAVANA	gene	153357854	153361023	+	2.18297	8.20715	32.7276	8.01508e-18	5.37613e-16	30.9309
ENSG00000129353.15	protein_coding	SLC44A2	1	OTTHUMG00000180585.4	chr19	HAVANA	gene	10602457	10644557	+	1.76259	7.81407	32.6056	8.57823e-18	5.67655e-16	30.8812
ENSG00000165891.16	protein_coding	E2F7	2	OTTHUMG00000169969.3	chr12	HAVANA	gene	77021248	77065569	-	-3.07945	4.54495	-32.3672	9.80263e-18	6.28797e-16	30.8622
ENSG00000139734.19	protein_coding	DIAPH3	2	OTTHUMG00000017004.7	chr13	HAVANA	gene	59665583	60163928	-	-2.49716	5.36795	-32.2668	1.03724e-17	6.53716e-16	30.8573
ENSG00000070731.11	protein_coding	ST6GALNAC2	2	OTTHUMG00000191877.2	chr17	HAVANA	gene	76565377	76586956	-	2.6144	5.38955	32.2577	1.04254e-17	6.53716e-16	30.8517
ENSG00000123143.13	protein_coding	PKN1	1	OTTHUMG00000039611.3	chr19	HAVANA	gene	14433053	14471867	+	-1.70691	7.23645	-32.4697	9.25503e-18	6.00573e-16	30.8439
ENSG00000090889.12	protein_coding	KIF4A	2	OTTHUMG00000021775.2	chrX	HAVANA	gene	70290104	70420886	+	-2.50459	5.19031	-32.2389	1.05363e-17	6.58207e-16	30.8438
ENSG00000123975.5	protein_coding	CKS2	2	OTTHUMG00000020180.2	chr9	HAVANA	gene	89311195	89316703	+	-2.4851	5.80869	-32.2599	1.04125e-17	6.53716e-16	30.8365
ENSG00000111912.20	protein_coding	NCOA7	2	OTTHUMG00000015513.8	chr6	HAVANA	gene	125781161	125932034	+	1.88965	6.73371	32.3671	9.80311e-18	6.28797e-16	30.8227
ENSG00000079616.14	protein_coding	KIF22	1	OTTHUMG00000097771.5	chr16	HAVANA	gene	29790727	29805385	+	-2.00742	6.42985	-32.2918	1.02269e-17	6.48558e-16	30.8057
ENSG00000149503.13	protein_coding	INCENP	2	OTTHUMG00000167470.5	chr11	HAVANA	gene	62123998	62153169	+	-1.89099	6.85796	-32.3036	1.01596e-17	6.46736e-16	30.7793
ENSG00000131016.17	protein_coding	AKAP12	2	OTTHUMG00000015833.3	chr6	HAVANA	gene	151239967	151358559	+	-2.28941	8.44101	-32.3604	9.84021e-18	6.28797e-16	30.7067
ENSG00000100439.11	protein_coding	ABHD4	1	OTTHUMG00000028686.7	chr14	HAVANA	gene	22598290	22612963	+	2.36688	5.25626	31.9159	1.26522e-17	7.7308e-16	30.6586
ENSG00000184992.13	protein_coding	BRI3BP	2	OTTHUMG00000168548.4	chr12	HAVANA	gene	124993645	125031231	+	-2.30742	5.79816	-31.9378	1.24959e-17	7.66325e-16	30.6492
ENSG00000137266.15	protein_coding	SLC22A23	1	OTTHUMG00000014144.4	chr6	HAVANA	gene	3268962	3457050	-	2.04272	5.79167	31.9411	1.24725e-17	7.66325e-16	30.6447
ENSG00000115053.17	protein_coding	NCL	1	OTTHUMG00000153866.4	chr2	HAVANA	gene	231453531	231483641	-	-1.29599	9.9689	-32.4107	9.56634e-18	6.18377e-16	30.6405
ENSG00000110104.13	protein_coding	CCDC86	2	OTTHUMG00000167706.4	chr11	HAVANA	gene	60842113	60851081	+	-1.73271	6.65238	-32.0399	1.17917e-17	7.33889e-16	30.6387
ENSG00000184445.12	protein_coding	KNTC1	1	OTTHUMG00000168861.7	chr12	HAVANA	gene	122527246	122626396	+	-2.35727	5.24844	-31.8372	1.32328e-17	8.0561e-16	30.6145
ENSG00000143878.10	protein_coding	RHOB	2	OTTHUMG00000090755.4	chr2	HAVANA	gene	20447074	20449440	+	2.70823	5.04762	31.8019	1.3502e-17	8.16067e-16	30.5959
ENSG00000180398.13	protein_coding	MCFD2	1	OTTHUMG00000153100.6	chr2	HAVANA	gene	46901870	46941855	-	-1.83055	6.25628	-31.8251	1.33242e-17	8.08237e-16	30.5444
ENSG00000069011.16	protein_coding	PITX1	2	OTTHUMG00000149983.7	chr5	HAVANA	gene	135027734	135034813	-	2.15882	7.94574	32.0026	1.20436e-17	7.44035e-16	30.5274
ENSG00000115008.6	protein_coding	IL1A	2	OTTHUMG00000131315.3	chr2	HAVANA	gene	112773925	112784493	-	-1.81441	8.01169	-32.0041	1.20338e-17	7.44035e-16	30.521
ENSG00000132561.14	protein_coding	MATN2	1	OTTHUMG00000164795.5	chr8	HAVANA	gene	97868840	98036724	+	3.11476	4.52252	31.6626	1.4623e-17	8.6815e-16	30.4752
ENSG00000131462.9	protein_coding	TUBG1	1	OTTHUMG00000180277.4	chr17	HAVANA	gene	42609641	42615238	+	-1.84	6.55251	-31.7378	1.40063e-17	8.37475e-16	30.4718
ENSG00000137337.16	protein_coding	MDC1	2	OTTHUMG00000031075.4	chr6	HAVANA	gene	30699807	30717447	-	-1.92601	5.83202	-31.6331	1.48727e-17	8.79852e-16	30.4635
ENSG00000084112.15	protein_coding	SSH1	2	OTTHUMG00000169371.4	chr12	HAVANA	gene	108778191	108857590	-	-1.92066	6.71564	-31.693	1.43706e-17	8.56202e-16	30.4348
ENSG00000070540.13	protein_coding	WIPI1	2	OTTHUMG00000179873.3	chr17	HAVANA	gene	68420948	68457513	-	3.04738	4.69556	31.541	1.56818e-17	9.21207e-16	30.4272
ENSG00000176463.14	protein_coding	SLCO3A1	1	OTTHUMG00000149846.6	chr15	HAVANA	gene	91853708	92172435	+	1.92445	6.18491	31.555	1.55556e-17	9.17013e-16	30.3909
ENSG00000092853.14	protein_coding	CLSPN	2	OTTHUMG00000004168.7	chr1	HAVANA	gene	35720218	35769978	-	-3.84671	4.15988	-31.7842	1.36391e-17	8.18444e-16	30.3826
ENSG00000126215.14	protein_coding	XRCC3	2	OTTHUMG00000169228.6	chr14	HAVANA	gene	103697609	103715504	-	-2.83413	4.67774	-31.449	1.65364e-17	9.61296e-16	30.3765
ENSG00000163507.15	protein_coding	CIP2A	2	OTTHUMG00000159233.3	chr3	HAVANA	gene	108549864	108589644	-	-2.70555	4.79617	-31.3935	1.70753e-17	9.82385e-16	30.3548
ENSG00000138182.15	protein_coding	KIF20B	2	OTTHUMG00000018725.2	chr10	HAVANA	gene	89701590	89774939	+	-2.65596	5.56124	-31.3965	1.70456e-17	9.82385e-16	30.3533
ENSG00000072110.16	protein_coding	ACTN1	1	OTTHUMG00000171386.6	chr14	HAVANA	gene	68874128	68979440	-	-1.41348	8.77519	-31.7845	1.36372e-17	8.18444e-16	30.3411
ENSG00000127564.17	protein_coding	PKMYT1	1	OTTHUMG00000128975.4	chr16	HAVANA	gene	2968024	2980479	-	-3.36735	4.66267	-31.3847	1.7162e-17	9.83992e-16	30.3191
ENSG00000104689.10	protein_coding	TNFRSF10A	2	OTTHUMG00000097843.4	chr8	HAVANA	gene	23190452	23225102	-	-2.34459	5.01062	-31.2657	1.8388e-17	1.03654e-15	30.288
ENSG00000100526.21	protein_coding	CDKN3	1	OTTHUMG00000140302.4	chr14	HAVANA	gene	54396849	54420218	+	-2.30674	5.35522	-31.2348	1.87214e-17	1.04581e-15	30.2623
ENSG00000134755.18	protein_coding	DSC2	2	OTTHUMG00000131981.8	chr18	HAVANA	gene	31058840	31102522	-	3.04998	5.65847	31.2273	1.88023e-17	1.04581e-15	30.2544
ENSG00000166881.10	protein_coding	NEMP1	2	OTTHUMG00000171021.2	chr12	HAVANA	gene	57055643	57088063	-	-2.64971	5.50039	-31.2173	1.89124e-17	1.04648e-15	30.2511
ENSG00000198176.13	protein_coding	TFDP1	2	OTTHUMG00000017388.7	chr13	HAVANA	gene	113584721	113641473	+	-1.45627	7.73131	-31.5213	1.58605e-17	9.2845e-16	30.2503
ENSG00000103855.18	protein_coding	CD276	1	OTTHUMG00000137585.9	chr15	HAVANA	gene	73683966	73714514	+	-2.90094	4.95676	-31.2049	1.90499e-17	1.04786e-15	30.2497
ENSG00000163513.19	protein_coding	TGFBR2	2	OTTHUMG00000130569.8	chr3	HAVANA	gene	30606601	30694142	+	-1.90626	5.86338	-31.2538	1.85158e-17	1.04024e-15	30.2382
ENSG00000198369.10	protein_coding	SPRED2	1	OTTHUMG00000152737.6	chr2	HAVANA	gene	65310851	65432637	-	-3.0504	4.46748	-31.2278	1.8797e-17	1.04581e-15	30.2211
ENSG00000148229.13	protein_coding	POLE3	2	OTTHUMG00000020523.3	chr9	HAVANA	gene	113407235	113410675	-	-1.6801	6.54625	-31.2845	1.81888e-17	1.02878e-15	30.2014
ENSG00000198363.18	protein_coding	ASPH	2	OTTHUMG00000164375.13	chr8	HAVANA	gene	61500556	61714640	-	-1.65236	8.25703	-31.4878	1.61695e-17	9.43241e-16	30.198
ENSG00000133639.6	protein_coding	BTG1	2	OTTHUMG00000170092.6	chr12	HAVANA	gene	92140278	92145846	-	1.71439	6.67795	31.2927	1.81023e-17	1.02735e-15	30.1946
ENSG00000119326.15	protein_coding	CTNNAL1	2	OTTHUMG00000020466.4	chr9	HAVANA	gene	108942569	109013522	-	-1.75345	7.05521	-31.3311	1.77031e-17	1.01156e-15	30.1913
ENSG00000163808.17	protein_coding	KIF15	2	OTTHUMG00000156307.8	chr3	HAVANA	gene	44761721	44873376	+	-3.42406	4.16199	-31.3225	1.77921e-17	1.01318e-15	30.187
ENSG00000013573.17	protein_coding	DDX11	2	OTTHUMG00000168435.7	chr12	HAVANA	gene	31073860	31104799	+	-2.27863	5.11923	-31.074	2.05601e-17	1.11038e-15	30.1748
ENSG00000137310.13	protein_coding	TCF19	2	OTTHUMG00000031274.4	chr6	HAVANA	gene	31158331	31167159	+	-2.66575	4.66658	-31.0619	2.07063e-17	1.11111e-15	30.1585
ENSG00000166197.17	protein_coding	NOLC1	1	OTTHUMG00000018944.5	chr10	HAVANA	gene	102152176	102163871	+	-1.56684	8.08543	-31.3948	1.7062e-17	9.82385e-16	30.1526
ENSG00000167900.12	protein_coding	TK1	2	OTTHUMG00000150674.6	chr17	HAVANA	gene	78174091	78187233	-	-1.74498	6.34218	-31.0981	2.02733e-17	1.102e-15	30.1072
ENSG00000151503.14	protein_coding	NCAPD3	1	OTTHUMG00000167172.6	chr11	HAVANA	gene	134150113	134225504	-	-2.63813	5.63919	-30.9774	2.17554e-17	1.15621e-15	30.1028
ENSG00000132182.13	protein_coding	NUP210	2	OTTHUMG00000157268.3	chr3	HAVANA	gene	13316235	13420322	-	-1.95017	6.18589	-31.0622	2.07018e-17	1.11111e-15	30.102
ENSG00000119403.15	protein_coding	PHF19	2	OTTHUMG00000020577.7	chr9	HAVANA	gene	120855651	120894896	-	-2.29023	5.56233	-30.9721	2.18232e-17	1.15621e-15	30.0975
ENSG00000214063.12	protein_coding	TSPAN4	2	OTTHUMG00000133305.7	chr11	HAVANA	gene	842812	867116	+	-2.43117	5.18407	-30.9429	2.22001e-17	1.16908e-15	30.0975
ENSG00000198900.7	protein_coding	TOP1	2	OTTHUMG00000033057.3	chr20	HAVANA	gene	41028822	41124487	+	-1.60146	7.39715	-31.2013	1.90896e-17	1.04786e-15	30.0847
ENSG00000135476.12	protein_coding	ESPL1	2	OTTHUMG00000169674.6	chr12	HAVANA	gene	53268299	53293638	+	-2.82658	4.53265	-30.9425	2.22056e-17	1.16908e-15	30.0754
ENSG00000012822.16	protein_coding	CALCOCO1	1	OTTHUMG00000170095.5	chr12	HAVANA	gene	53708517	53727745	-	2.27815	5.20175	30.8927	2.28638e-17	1.19621e-15	30.0649
ENSG00000075218.19	protein_coding	GTSE1	2	OTTHUMG00000150486.4	chr22	HAVANA	gene	46296870	46330810	+	-2.78725	5.14228	-30.8579	2.33365e-17	1.21713e-15	30.05
ENSG00000123146.20	protein_coding	ADGRE5	1	OTTHUMG00000182166.5	chr19	HAVANA	gene	14380501	14408725	+	-1.9893	5.6338	-30.8957	2.2824e-17	1.19621e-15	30.0424
ENSG00000164032.12	protein_coding	H2AZ1	1	OTTHUMG00000131048.7	chr4	HAVANA	gene	99948086	99950355	-	-1.74717	7.06954	-31.0775	2.0518e-17	1.11038e-15	30.0381
ENSG00000168078.10	protein_coding	PBK	1	OTTHUMG00000102113.6	chr8	HAVANA	gene	27809624	27838082	-	-3.34268	4.27862	-30.9874	2.16284e-17	1.15319e-15	30.0351
ENSG00000129219.14	protein_coding	PLD2	1	OTTHUMG00000090779.7	chr17	HAVANA	gene	4807152	4823434	+	2.28182	5.46325	30.8277	2.37554e-17	1.22373e-15	30.0149
ENSG00000066279.19	protein_coding	ASPM	2	OTTHUMG00000036277.2	chr1	HAVANA	gene	197084121	197146694	-	-2.67183	5.67825	-30.831	2.3709e-17	1.22373e-15	30.0146
ENSG00000143799.14	protein_coding	PARP1	2	OTTHUMG00000037556.4	chr1	HAVANA	gene	226360210	226408154	-	-1.39588	8.01526	-31.1162	2.00598e-17	1.09395e-15	29.9881
ENSG00000171793.17	protein_coding	CTPS1	2	OTTHUMG00000005712.13	chr1	HAVANA	gene	40979300	41012565	+	-1.99046	5.88707	-30.8119	2.39767e-17	1.23135e-15	29.975
ENSG00000030582.19	protein_coding	GRN	1	OTTHUMG00000181816.4	chr17	HAVANA	gene	44345246	44353106	+	1.31396	9.2596	31.2149	1.89393e-17	1.04648e-15	29.9713
ENSG00000062038.15	protein_coding	CDH3	2	OTTHUMG00000137560.8	chr16	HAVANA	gene	68636189	68727468	+	1.26065	8.95367	31.131	1.98872e-17	1.08808e-15	29.9382
ENSG00000167601.12	protein_coding	AXL	1	OTTHUMG00000182727.4	chr19	HAVANA	gene	41219223	41261766	+	-1.7541	6.49169	-30.762	2.46934e-17	1.26427e-15	29.8936
ENSG00000104140.7	protein_coding	RHOV	2	OTTHUMG00000130134.3	chr15	HAVANA	gene	40872214	40874234	-	2.9869	5.15547	30.5898	2.7341e-17	1.39132e-15	29.8918
ENSG00000155066.16	protein_coding	PROM2	2	OTTHUMG00000130393.4	chr2	HAVANA	gene	95274449	95291308	+	1.58599	7.84043	30.8292	2.37339e-17	1.22373e-15	29.8264
ENSG00000165655.17	protein_coding	ZNF503	2	OTTHUMG00000018526.3	chr10	HAVANA	gene	75397830	75401764	-	2.75538	5.33692	30.488	2.90448e-17	1.46909e-15	29.825
ENSG00000184661.14	protein_coding	CDCA2	1	OTTHUMG00000099429.7	chr8	HAVANA	gene	25459199	25507911	+	-3.06647	4.45607	-30.5172	2.85453e-17	1.4482e-15	29.8125
ENSG00000117724.15	protein_coding	CENPF	2	OTTHUMG00000036955.2	chr1	HAVANA	gene	214603185	214664574	+	-2.51774	5.95663	-30.4635	2.94706e-17	1.48614e-15	29.772
ENSG00000049541.11	protein_coding	RFC2	2	OTTHUMG00000023239.8	chr7	HAVANA	gene	74231499	74254458	-	-2.36125	5.07342	-30.3896	3.07987e-17	1.53462e-15	29.7711
ENSG00000160957.15	protein_coding	RECQL4	2	OTTHUMG00000165178.7	chr8	HAVANA	gene	144511288	144517845	-	-2.83509	4.80292	-30.3295	3.19249e-17	1.57666e-15	29.7338
ENSG00000291122.1	lncRNA	CASTOR3P	2	NA	chr7	HAVANA	gene	100200653	100272218	-	3.47627	4.19878	30.4244	3.01652e-17	1.51659e-15	29.6976
ENSG00000116237.16	protein_coding	ICMT	2	OTTHUMG00000001254.3	chr1	HAVANA	gene	6221193	6235972	-	-1.84269	6.34133	-30.4047	3.05226e-17	1.52924e-15	29.6902
ENSG00000069812.11	protein_coding	HES2	2	OTTHUMG00000000752.2	chr1	HAVANA	gene	6412418	6424670	-	1.82929	5.88927	30.344	3.16493e-17	1.56767e-15	29.6863
ENSG00000115902.11	protein_coding	SLC1A4	1	OTTHUMG00000129537.4	chr2	HAVANA	gene	64988477	65023865	+	2.68712	4.50536	30.2232	3.4023e-17	1.67042e-15	29.6614
ENSG00000198121.15	protein_coding	LPAR1	2	OTTHUMG00000020486.3	chr9	HAVANA	gene	110873263	111038470	-	-1.75421	6.39628	-30.3515	3.15082e-17	1.56531e-15	29.6513
ENSG00000099194.6	protein_coding	SCD	2	OTTHUMG00000018906.3	chr10	HAVANA	gene	100347233	100364826	+	1.66554	10.775	30.7396	2.50212e-17	1.27715e-15	29.5964
ENSG00000096746.18	protein_coding	HNRNPH3	2	OTTHUMG00000018349.2	chr10	HAVANA	gene	68331174	68343193	+	-1.50208	7.40969	-30.4005	3.05994e-17	1.52924e-15	29.5954
ENSG00000160949.18	protein_coding	TONSL	2	OTTHUMG00000153122.4	chr8	HAVANA	gene	144428775	144444440	-	-2.66227	4.76659	-30.0112	3.86548e-17	1.86501e-15	29.5447
ENSG00000101412.13	protein_coding	E2F1	2	OTTHUMG00000032265.3	chr20	HAVANA	gene	33675477	33686385	-	-3.09874	4.44251	-30.0425	3.79319e-17	1.84074e-15	29.5324
ENSG00000112312.10	protein_coding	GMNN	2	OTTHUMG00000014363.5	chr6	HAVANA	gene	24774931	24786099	+	-2.52062	5.10919	-29.9626	3.98082e-17	1.89877e-15	29.514
ENSG00000165480.16	protein_coding	SKA3	1	OTTHUMG00000016539.5	chr13	HAVANA	gene	21153595	21176552	-	-2.75317	5.07959	-29.9438	4.02638e-17	1.91505e-15	29.505
ENSG00000164109.14	protein_coding	MAD2L1	2	OTTHUMG00000132967.4	chr4	HAVANA	gene	120055623	120066858	-	-3.35975	4.13994	-30.0704	3.7298e-17	1.82054e-15	29.481
ENSG00000112742.10	protein_coding	TTK	1	OTTHUMG00000015088.5	chr6	HAVANA	gene	80003887	80042527	+	-2.53989	5.30923	-29.8755	4.19646e-17	1.98466e-15	29.4541
ENSG00000131242.18	protein_coding	RAB11FIP4	1	OTTHUMG00000132787.7	chr17	HAVANA	gene	31391675	31538211	+	1.71883	6.23414	29.9976	3.89742e-17	1.86965e-15	29.4434
ENSG00000173638.19	protein_coding	SLC19A1	1	OTTHUMG00000090397.9	chr21	HAVANA	gene	45493572	45573365	-	-2.63412	4.83758	-29.837	4.29574e-17	2.02021e-15	29.441
ENSG00000139433.11	protein_coding	GLTP	2	OTTHUMG00000169278.3	chr12	HAVANA	gene	109850945	109880541	-	1.4836	7.30855	30.1098	3.64238e-17	1.78306e-15	29.421
ENSG00000024526.17	protein_coding	DEPDC1	2	OTTHUMG00000009212.5	chr1	HAVANA	gene	68474152	68497221	-	-2.87498	4.86717	-29.7897	4.42114e-17	2.06756e-15	29.4116
ENSG00000068078.20	protein_coding	FGFR3	1	OTTHUMG00000121148.7	chr4	HAVANA	gene	1793293	1808872	+	1.81051	6.77065	30.0036	3.88339e-17	1.86827e-15	29.4045
ENSG00000141579.7	protein_coding	ZNF750	2	OTTHUMG00000177822.4	chr17	HAVANA	gene	82829434	82840022	-	3.50029	4.51888	29.8242	4.32922e-17	2.03024e-15	29.3986
ENSG00000136068.16	protein_coding	FLNB	1	OTTHUMG00000159158.1	chr3	HAVANA	gene	58008398	58172251	+	-1.37858	9.52896	-30.3038	3.24203e-17	1.59641e-15	29.3981
ENSG00000084774.14	protein_coding	CAD	1	OTTHUMG00000097070.6	chr2	HAVANA	gene	27217369	27243943	+	-1.54663	6.92715	-30.0158	3.85472e-17	1.86501e-15	29.3965
ENSG00000197771.13	protein_coding	MCMBP	2	OTTHUMG00000019159.4	chr10	HAVANA	gene	119829404	119892556	-	-1.70555	6.67707	-29.9664	3.97168e-17	1.89877e-15	29.3895
ENSG00000197712.12	protein_coding	FAM114A1	2	OTTHUMG00000128583.5	chr4	HAVANA	gene	38867677	38945739	+	2.41116	4.70012	29.7095	4.64244e-17	2.16003e-15	29.3635
ENSG00000113916.18	protein_coding	BCL6	1	OTTHUMG00000156441.4	chr3	HAVANA	gene	187721377	187745725	-	2.46341	4.86476	29.6596	4.78614e-17	2.21352e-15	29.3329
ENSG00000089327.15	protein_coding	FXYD5	1	OTTHUMG00000048092.3	chr19	HAVANA	gene	35154730	35169881	+	-1.57247	7.08932	-29.9054	4.12109e-17	1.95454e-15	29.3146
ENSG00000163918.12	protein_coding	RFC4	2	OTTHUMG00000156515.8	chr3	HAVANA	gene	186789880	186807058	-	-2.57819	4.86812	-29.6172	4.91165e-17	2.26531e-15	29.3076
ENSG00000144354.15	protein_coding	CDCA7	2	OTTHUMG00000132296.3	chr2	HAVANA	gene	173354820	173368997	+	-3.56939	4.29277	-29.6882	4.70333e-17	2.18125e-15	29.2724
ENSG00000095587.9	protein_coding	TLL2	2	OTTHUMG00000018833.3	chr10	HAVANA	gene	96364608	96513926	-	2.54261	4.71946	29.5523	5.11095e-17	2.3252e-15	29.2676
ENSG00000115756.13	protein_coding	HPCAL1	2	OTTHUMG00000090451.6	chr2	HAVANA	gene	10302889	10427617	+	-3.08846	5.00429	-29.5102	5.24463e-17	2.37312e-15	29.2421
ENSG00000166689.18	protein_coding	PLEKHA7	1	OTTHUMG00000165954.5	chr11	HAVANA	gene	16777297	17014415	-	1.94851	5.55353	29.5543	5.10478e-17	2.3252e-15	29.2271
ENSG00000065809.14	protein_coding	FAM107B	2	OTTHUMG00000017709.4	chr10	HAVANA	gene	14518557	14774897	-	-3.18896	4.73887	-29.4896	5.31135e-17	2.39684e-15	29.222
ENSG00000135926.15	protein_coding	TMBIM1	2	OTTHUMG00000133105.11	chr2	HAVANA	gene	218274197	218292586	-	1.32935	7.99924	29.8521	4.25662e-17	2.00745e-15	29.2088
ENSG00000151725.12	protein_coding	CENPU	2	OTTHUMG00000160499.20	chr4	HAVANA	gene	184694085	184734130	-	-2.86115	4.62396	-29.4515	5.43746e-17	2.43406e-15	29.1993
ENSG00000105289.15	protein_coding	TJP3	2	OTTHUMG00000180872.3	chr19	HAVANA	gene	3708362	3750813	+	4.19772	4.37984	29.5928	4.98556e-17	2.2868e-15	29.1884
ENSG00000101187.16	protein_coding	SLCO4A1	2	OTTHUMG00000032923.5	chr20	HAVANA	gene	62642503	62685785	+	-4.94098	3.98533	-30.0572	3.75962e-17	1.82976e-15	29.1664
ENSG00000186480.13	protein_coding	INSIG1	1	OTTHUMG00000151330.6	chr7	HAVANA	gene	155297776	155310235	+	2.09402	6.45501	29.5663	5.06723e-17	2.31791e-15	29.1637
ENSG00000167106.12	protein_coding	EEIG1	2	OTTHUMG00000020720.5	chr9	HAVANA	gene	127940582	127980989	-	2.07003	5.73401	29.4526	5.4335e-17	2.43406e-15	29.1523
ENSG00000106462.12	protein_coding	EZH2	2	OTTHUMG00000158973.3	chr7	HAVANA	gene	148807257	148884321	-	-1.90457	5.65599	-29.4432	5.46515e-17	2.43993e-15	29.1515
ENSG00000166750.10	protein_coding	SLFN5	1	OTTHUMG00000179858.3	chr17	HAVANA	gene	35243071	35273655	+	1.9359	6.4852	29.5471	5.1272e-17	2.32628e-15	29.1454
ENSG00000100714.18	protein_coding	MTHFD1	1	OTTHUMG00000141309.15	chr14	HAVANA	gene	64388031	64463457	+	-1.41683	7.70581	-29.7087	4.64466e-17	2.16003e-15	29.1409
ENSG00000077152.12	protein_coding	UBE2T	2	OTTHUMG00000041392.5	chr1	HAVANA	gene	202331544	202341984	-	-2.86236	4.77516	-29.3199	5.89687e-17	2.59122e-15	29.1238
ENSG00000101003.12	protein_coding	GINS1	2	OTTHUMG00000032124.2	chr20	HAVANA	gene	25391008	25452700	+	-3.04308	4.50413	-29.2509	6.15391e-17	2.69004e-15	29.0654
ENSG00000168411.14	protein_coding	RFWD3	2	OTTHUMG00000177368.7	chr16	HAVANA	gene	74621399	74666877	-	-1.66445	6.56358	-29.43	5.50963e-17	2.44674e-15	29.0616
ENSG00000164078.14	protein_coding	MST1R	1	OTTHUMG00000156709.7	chr3	HAVANA	gene	49887002	49903873	-	-1.69071	6.28945	-29.3563	5.76576e-17	2.54027e-15	29.039
ENSG00000145934.17	protein_coding	TENM2	1	OTTHUMG00000162928.4	chr5	HAVANA	gene	166979029	168264157	+	2.66463	4.44574	29.1806	6.42817e-17	2.79534e-15	29.0309
ENSG00000174371.17	protein_coding	EXO1	1	OTTHUMG00000039965.9	chr1	HAVANA	gene	241847967	241895148	+	-3.73867	3.90979	-29.4532	5.4317e-17	2.43406e-15	29.0182
ENSG00000187741.16	protein_coding	FANCA	2	OTTHUMG00000173049.7	chr16	HAVANA	gene	89726683	89816977	-	-2.86465	4.32015	-29.175	6.45047e-17	2.79777e-15	29.0096
ENSG00000080839.12	protein_coding	RBL1	2	OTTHUMG00000032406.5	chr20	HAVANA	gene	36996349	37095997	-	-2.41672	5.38834	-29.1582	6.51805e-17	2.81977e-15	29.0029
ENSG00000175832.13	protein_coding	ETV4	1	OTTHUMG00000180884.2	chr17	HAVANA	gene	43527844	43579620	-	-5.31903	3.42013	-30.8278	2.37538e-17	1.22373e-15	28.9947
ENSG00000092470.12	protein_coding	WDR76	1	OTTHUMG00000060143.12	chr15	HAVANA	gene	43826980	43868412	+	-3.0085	4.41173	-29.125	6.6539e-17	2.86541e-15	28.983
ENSG00000128050.9	protein_coding	PAICS	1	OTTHUMG00000160957.4	chr4	HAVANA	gene	56435741	56464578	+	-1.54563	7.79548	-29.4349	5.493e-17	2.44584e-15	28.9624
ENSG00000122861.16	protein_coding	PLAU	2	OTTHUMG00000018494.6	chr10	HAVANA	gene	73909177	73917496	+	1.14658	10.4782	29.6043	4.95062e-17	2.27701e-15	28.9005
ENSG00000231925.14	protein_coding	TAPBP	1	OTTHUMG00000031090.6	chr6	HAVANA	gene	33299694	33314284	-	1.39129	8.76992	29.4228	5.53429e-17	2.44951e-15	28.8878
ENSG00000115875.19	protein_coding	SRSF7	2	OTTHUMG00000102076.6	chr2	HAVANA	gene	38743599	38751494	-	-1.53734	6.7011	-29.1241	6.65777e-17	2.86541e-15	28.8524
ENSG00000144554.13	protein_coding	FANCD2	2	OTTHUMG00000128670.3	chr3	HAVANA	gene	10026370	10101932	+	-2.44181	5.46439	-28.9114	7.60271e-17	3.23057e-15	28.8425
ENSG00000137193.14	protein_coding	PIM1	2	OTTHUMG00000016426.2	chr6	HAVANA	gene	37170152	37175428	+	1.64641	6.2149	28.9935	7.22202e-17	3.07662e-15	28.811
ENSG00000107566.14	protein_coding	ERLIN1	2	OTTHUMG00000018900.4	chr10	HAVANA	gene	100150094	100186033	-	-1.52933	6.69055	-29.0535	6.95693e-17	2.97885e-15	28.8079
ENSG00000117632.23	protein_coding	STMN1	2	OTTHUMG00000007389.4	chr1	HAVANA	gene	25884181	25906991	-	-1.66205	6.90901	-29.0777	6.85244e-17	2.94163e-15	28.8073
ENSG00000039068.20	protein_coding	CDH1	2	OTTHUMG00000137561.6	chr16	HAVANA	gene	68737292	68835537	+	1.27134	8.71511	29.2545	6.14029e-17	2.69004e-15	28.7827
ENSG00000171208.10	protein_coding	NETO2	1	OTTHUMG00000133101.5	chr16	HAVANA	gene	47077703	47143945	-	-1.76677	5.93489	-28.8834	7.73706e-17	3.27106e-15	28.7702
ENSG00000186871.7	protein_coding	ERCC6L	1	OTTHUMG00000021810.4	chrX	HAVANA	gene	72204657	72239027	-	-3.28486	3.9845	-28.863	7.8364e-17	3.30471e-15	28.7429
ENSG00000144381.18	protein_coding	HSPD1	2	OTTHUMG00000154463.5	chr2	HAVANA	gene	197486584	197516737	-	-1.31538	9.11473	-29.2141	6.29581e-17	2.74491e-15	28.7329
ENSG00000165458.15	protein_coding	INPPL1	1	OTTHUMG00000167879.4	chr11	HAVANA	gene	72223701	72239147	+	1.46344	7.37356	29.0193	7.10684e-17	3.03527e-15	28.725
ENSG00000166451.14	protein_coding	CENPN	2	OTTHUMG00000137628.2	chr16	HAVANA	gene	81006552	81033114	+	-1.83162	5.70031	-28.7365	8.48525e-17	3.5515e-15	28.6977
ENSG00000141076.18	protein_coding	UTP4	1	OTTHUMG00000137570.7	chr16	HAVANA	gene	69131291	69231130	+	-1.49472	6.86181	-28.8865	7.72195e-17	3.27106e-15	28.6848
ENSG00000167741.11	protein_coding	GGT6	2	OTTHUMG00000177827.2	chr17	HAVANA	gene	4556927	4560818	-	3.23206	4.00917	28.7096	8.63023e-17	3.60317e-15	28.6695
ENSG00000068489.13	protein_coding	PRR11	1	OTTHUMG00000179362.3	chr17	HAVANA	gene	59155732	59206709	+	-1.81984	6.20976	-28.7459	8.43498e-17	3.5473e-15	28.6585
ENSG00000146263.12	protein_coding	MMS22L	1	OTTHUMG00000015248.4	chr6	HAVANA	gene	97142161	97283217	-	-2.4317	4.85841	-28.5132	9.77148e-17	4.01951e-15	28.6188
ENSG00000137936.18	protein_coding	BCAR3	2	OTTHUMG00000010301.5	chr1	HAVANA	gene	93561741	93847150	-	-1.68102	6.26677	-28.5841	9.34218e-17	3.8619e-15	28.5452
ENSG00000164300.17	protein_coding	SERINC5	1	OTTHUMG00000162563.11	chr5	HAVANA	gene	80111651	80256048	-	1.63549	7.46234	28.7423	8.45402e-17	3.5473e-15	28.5409
ENSG00000109255.11	protein_coding	NMU	2	OTTHUMG00000102161.4	chr4	HAVANA	gene	55595229	55636698	-	2.51968	4.67606	28.3616	1.07611e-16	4.37287e-15	28.5249
ENSG00000114346.14	protein_coding	ECT2	1	OTTHUMG00000156762.6	chr3	HAVANA	gene	172750682	172821474	+	-1.98852	6.73637	-28.5948	9.27905e-17	3.8453e-15	28.5173
ENSG00000182326.17	protein_coding	C1S	1	OTTHUMG00000150305.5	chr12	HAVANA	gene	6988259	7071032	+	5.30941	3.62366	29.4196	5.54512e-17	2.44951e-15	28.5125
ENSG00000176208.9	protein_coding	ATAD5	2	OTTHUMG00000132794.4	chr17	HAVANA	gene	30831966	30895869	+	-3.29294	3.96076	-28.4717	1.00322e-16	4.11663e-15	28.5006
ENSG00000172037.14	protein_coding	LAMB2	2	OTTHUMG00000156807.5	chr3	HAVANA	gene	49121114	49133118	-	1.60222	6.65744	28.5299	9.6686e-17	3.98699e-15	28.4707
ENSG00000110107.9	protein_coding	PRPF19	1	OTTHUMG00000167798.3	chr11	HAVANA	gene	60890547	60906585	-	-1.27392	7.9497	-28.6886	8.74509e-17	3.64205e-15	28.4667
ENSG00000181026.15	protein_coding	AEN	2	OTTHUMG00000148681.7	chr15	HAVANA	gene	88621337	88632281	+	-2.07873	5.10412	-28.2428	1.16094e-16	4.64988e-15	28.4293
ENSG00000120694.20	protein_coding	HSPH1	1	OTTHUMG00000016685.6	chr13	HAVANA	gene	31134973	31162388	-	-1.28961	8.41708	-28.6792	8.7972e-17	3.65466e-15	28.4292
ENSG00000188042.8	protein_coding	ARL4C	2	OTTHUMG00000133291.3	chr2	HAVANA	gene	234493041	234497081	-	-3.8308	4.01012	-28.408	1.04471e-16	4.266e-15	28.4193
ENSG00000035499.13	protein_coding	DEPDC1B	2	OTTHUMG00000097083.4	chr5	HAVANA	gene	60596912	60700190	-	-3.20423	3.87833	-28.3465	1.0865e-16	4.38319e-15	28.4146
ENSG00000100100.13	protein_coding	PIK3IP1	2	OTTHUMG00000151256.3	chr22	HAVANA	gene	31281594	31292534	-	3.67557	4.00566	28.3415	1.08995e-16	4.38654e-15	28.4075
ENSG00000175274.19	protein_coding	TP53I11	1	OTTHUMG00000165714.4	chr11	HAVANA	gene	44885903	44951306	-	2.6231	4.4185	28.1606	1.22382e-16	4.86877e-15	28.3934
ENSG00000143179.16	protein_coding	UCK2	2	OTTHUMG00000040117.4	chr1	HAVANA	gene	165827614	165911618	+	-1.65668	6.43683	-28.3663	1.07284e-16	4.3702e-15	28.387
ENSG00000138131.4	protein_coding	LOXL4	2	OTTHUMG00000018874.2	chr10	HAVANA	gene	98247690	98268194	-	6.94869	3.53047	31.0446	2.09162e-17	1.11878e-15	28.3463
ENSG00000157557.13	protein_coding	ETS2	2	OTTHUMG00000090769.8	chr21	HAVANA	gene	38805183	38824955	+	1.35921	7.51046	28.4451	1.02035e-16	4.17669e-15	28.3387
ENSG00000133985.3	protein_coding	TTC9	2	OTTHUMG00000172133.2	chr14	HAVANA	gene	70641916	70675366	+	1.98511	5.53262	28.1347	1.24429e-16	4.93648e-15	28.3221
ENSG00000215182.8	protein_coding	MUC5AC	1	OTTHUMG00000154270.5	chr11	HAVANA	gene	1157953	1201138	+	-3.96328	4.41795	-28.1249	1.2522e-16	4.9561e-15	28.3196
ENSG00000130204.13	protein_coding	TOMM40	2	OTTHUMG00000180842.4	chr19	HAVANA	gene	44890569	44903689	+	-1.44848	7.10316	-28.3527	1.08224e-16	4.37653e-15	28.3143
ENSG00000173207.13	protein_coding	CKS1B	2	OTTHUMG00000037413.4	chr1	HAVANA	gene	154974653	154979251	+	-2.45297	5.04945	-28.0092	1.34911e-16	5.31452e-15	28.2874
ENSG00000008323.16	protein_coding	PLEKHG6	2	OTTHUMG00000168266.1	chr12	HAVANA	gene	6310436	6328506	+	2.8704	4.4532	27.9756	1.3787e-16	5.41836e-15	28.2734
ENSG00000148346.12	protein_coding	LCN2	2	OTTHUMG00000020734.1	chr9	HAVANA	gene	128149071	128153453	+	2.03044	5.87737	28.1035	1.26951e-16	5.01275e-15	28.2719
ENSG00000152784.16	protein_coding	PRDM8	2	OTTHUMG00000160885.3	chr4	HAVANA	gene	80183879	80204329	+	-2.64148	4.6481	-27.9437	1.40745e-16	5.4723e-15	28.2572
ENSG00000100162.15	protein_coding	CENPM	1	OTTHUMG00000151277.3	chr22	HAVANA	gene	41938737	41947152	-	-2.84995	4.15914	-27.9396	1.41118e-16	5.4723e-15	28.2282
ENSG00000069399.15	protein_coding	BCL3	1	OTTHUMG00000151517.4	chr19	HAVANA	gene	44747705	44760044	+	1.96061	5.19116	27.9457	1.4056e-16	5.4723e-15	28.2251
ENSG00000213859.8	protein_coding	KCTD11	2	OTTHUMG00000132061.4	chr17	HAVANA	gene	7351889	7354944	+	2.7638	4.68399	27.8852	1.46176e-16	5.63889e-15	28.2194
ENSG00000096063.16	protein_coding	SRPK1	1	OTTHUMG00000014583.7	chr6	HAVANA	gene	35832966	35921342	-	-1.48353	6.85916	-28.1705	1.21602e-16	4.85888e-15	28.2162
ENSG00000170515.14	protein_coding	PA2G4	1	OTTHUMG00000170173.4	chr12	HAVANA	gene	56104537	56113910	+	-1.29488	8.32078	-28.3274	1.09985e-16	4.41574e-15	28.2038
ENSG00000110660.15	protein_coding	SLC35F2	2	OTTHUMG00000166366.4	chr11	HAVANA	gene	107790991	107928293	-	-1.38327	7.32534	-28.1599	1.22432e-16	4.86877e-15	28.1669
ENSG00000163191.6	protein_coding	S100A11	2	OTTHUMG00000013069.2	chr1	HAVANA	gene	152032506	152047907	-	1.24167	9.60707	28.3575	1.07889e-16	4.37355e-15	28.1418
ENSG00000143228.13	protein_coding	NUF2	1	OTTHUMG00000034275.4	chr1	HAVANA	gene	163266576	163355764	+	-3.06934	4.26874	-27.7747	1.57052e-16	6.03065e-15	28.1256
ENSG00000173267.14	protein_coding	SNCG	2	OTTHUMG00000018656.2	chr10	HAVANA	gene	86958599	86963258	+	1.94272	6.46794	27.9686	1.38497e-16	5.43024e-15	28.1251
ENSG00000173227.14	protein_coding	SYT12	2	OTTHUMG00000167101.3	chr11	HAVANA	gene	67006778	67050863	+	1.99359	5.19704	27.7649	1.58054e-16	6.05525e-15	28.1063
ENSG00000134339.9	protein_coding	SAA2	1	OTTHUMG00000166484.1	chr11	HAVANA	gene	18239223	18248668	-	2.84916	4.22517	27.6391	1.71567e-16	6.51332e-15	28.046
ENSG00000163950.13	protein_coding	SLBP	1	OTTHUMG00000089349.7	chr4	HAVANA	gene	1692731	1712344	-	-1.76744	5.75658	-27.7273	1.61977e-16	6.19136e-15	28.0301
ENSG00000198788.9	protein_coding	MUC2	2	OTTHUMG00000156800.4	chr11	HAVANA	gene	1074875	1110511	+	-4.42904	4.05893	-27.8519	1.49363e-16	5.74858e-15	28.019
ENSG00000135451.13	protein_coding	TROAP	2	OTTHUMG00000169486.3	chr12	HAVANA	gene	49323236	49331731	+	-2.24585	5.01572	-27.579	1.78459e-16	6.72918e-15	28.003
ENSG00000064666.15	protein_coding	CNN2	2	OTTHUMG00000172729.9	chr19	HAVANA	gene	1026586	1039068	+	-1.21254	8.46348	-27.949	1.40263e-16	5.4723e-15	27.9412
ENSG00000119801.13	protein_coding	YPEL5	2	OTTHUMG00000097839.5	chr2	HAVANA	gene	30146941	30160533	+	2.0747	5.31823	27.5211	1.85359e-16	6.9718e-15	27.9364
ENSG00000053372.5	protein_coding	MRTO4	2	OTTHUMG00000002496.4	chr1	HAVANA	gene	19251805	19260128	+	-1.74986	5.93984	-27.5988	1.76157e-16	6.65739e-15	27.9262
ENSG00000103187.8	protein_coding	COTL1	2	OTTHUMG00000137634.5	chr16	HAVANA	gene	84565596	84618078	-	-1.18413	8.72768	-27.8907	1.45654e-16	5.63172e-15	27.8847
ENSG00000163629.13	protein_coding	PTPN13	1	OTTHUMG00000160968.3	chr4	HAVANA	gene	86594315	86815171	+	1.47557	7.07706	27.7046	1.64393e-16	6.26939e-15	27.8826
ENSG00000254470.3	protein_coding	AP5B1	2	OTTHUMG00000166593.3	chr11	HAVANA	gene	65773898	65780976	-	1.68116	5.78176	27.497	1.88313e-16	7.04641e-15	27.8686
ENSG00000100767.17	protein_coding	PAPLN	2	OTTHUMG00000171366.5	chr14	HAVANA	gene	73237497	73274640	+	4.49099	3.53676	27.9386	1.41204e-16	5.4723e-15	27.8678
ENSG00000138496.17	protein_coding	PARP9	1	OTTHUMG00000159522.3	chr3	HAVANA	gene	122527924	122564577	-	1.73312	5.56984	27.4132	1.98982e-16	7.41951e-15	27.8335
ENSG00000080986.13	protein_coding	NDC80	1	OTTHUMG00000131483.5	chr18	HAVANA	gene	2571557	2616635	+	-2.80328	4.8426	-27.2937	2.15322e-16	7.95787e-15	27.8302
ENSG00000095585.18	protein_coding	BLNK	2	OTTHUMG00000018827.3	chr10	HAVANA	gene	96189171	96271587	-	2.72938	4.15852	27.2892	2.15967e-16	7.95916e-15	27.818
ENSG00000111247.15	protein_coding	RAD51AP1	1	OTTHUMG00000168125.5	chr12	HAVANA	gene	4538798	4560047	+	-3.73746	3.64209	-27.4951	1.88555e-16	7.04641e-15	27.7643
ENSG00000092201.10	protein_coding	SUPT16H	2	OTTHUMG00000029685.4	chr14	HAVANA	gene	21351476	21384019	-	-1.29694	8.1519	-27.6512	1.70219e-16	6.47683e-15	27.7619
ENSG00000143556.9	protein_coding	S100A7	2	OTTHUMG00000013123.2	chr1	HAVANA	gene	153457744	153460651	-	3.07654	4.58752	27.1675	2.34113e-16	8.52068e-15	27.7492
ENSG00000181649.8	protein_coding	PHLDA2	2	OTTHUMG00000010926.3	chr11	HAVANA	gene	2928273	2929420	-	-2.40903	5.1395	-27.1934	2.30125e-16	8.41212e-15	27.741
ENSG00000143815.15	protein_coding	LBR	2	OTTHUMG00000037520.18	chr1	HAVANA	gene	225401502	225428925	-	-1.79119	6.03673	-27.3056	2.13631e-16	7.91287e-15	27.7199
ENSG00000198805.13	protein_coding	PNP	1	OTTHUMG00000029546.4	chr14	HAVANA	gene	20461992	20477094	+	-1.60365	6.22645	-27.3322	2.09911e-16	7.79229e-15	27.7148
ENSG00000104549.12	protein_coding	SQLE	2	OTTHUMG00000164990.3	chr8	HAVANA	gene	124998497	125022283	+	1.28176	7.71667	27.5181	1.85726e-16	6.9718e-15	27.7014
ENSG00000093009.11	protein_coding	CDC45	1	OTTHUMG00000150386.3	chr22	HAVANA	gene	19479457	19520612	+	-3.65336	3.71363	-27.3339	2.09679e-16	7.79229e-15	27.7005
ENSG00000160208.13	protein_coding	RRP1B	2	OTTHUMG00000086872.4	chr21	HAVANA	gene	43659560	43696079	+	-1.61928	6.04333	-27.27	2.18726e-16	8.03051e-15	27.6907
ENSG00000121858.11	protein_coding	TNFSF10	1	OTTHUMG00000156917.3	chr3	HAVANA	gene	172505508	172523475	-	3.18062	4.2929	27.0965	2.45443e-16	8.87517e-15	27.6895
ENSG00000182782.8	protein_coding	HCAR2	2	OTTHUMG00000162722.2	chr12	HAVANA	gene	122701293	122703357	-	2.41653	4.97837	27.0919	2.46198e-16	8.87928e-15	27.681
ENSG00000138092.11	protein_coding	CENPO	1	OTTHUMG00000125525.4	chr2	HAVANA	gene	24793136	24822376	+	-2.27569	4.76374	-27.0308	2.56431e-16	9.13438e-15	27.6507
ENSG00000165507.9	protein_coding	DEPP1	2	OTTHUMG00000018063.4	chr10	HAVANA	gene	44970981	44978809	-	3.73986	4.10303	27.101	2.44709e-16	8.86779e-15	27.6437
ENSG00000072571.20	protein_coding	HMMR	2	OTTHUMG00000130381.8	chr5	HAVANA	gene	163460203	163491941	+	-2.92937	5.30978	-27.0434	2.54292e-16	9.07753e-15	27.6414
ENSG00000074181.9	protein_coding	NOTCH3	2	OTTHUMG00000183217.4	chr19	HAVANA	gene	15159038	15200995	-	3.4313	4.58171	27.0064	2.60652e-16	9.20642e-15	27.6394
ENSG00000006555.11	protein_coding	TTC22	1	OTTHUMG00000009916.4	chr1	HAVANA	gene	54779712	54801323	-	2.69293	4.28094	26.9603	2.68815e-16	9.435e-15	27.6083
ENSG00000086544.4	protein_coding	ITPKC	2	OTTHUMG00000182688.3	chr19	HAVANA	gene	40717112	40740860	+	1.69745	5.58261	27.0821	2.47812e-16	8.90316e-15	27.607
ENSG00000163947.12	protein_coding	ARHGEF3	1	OTTHUMG00000158857.9	chr3	HAVANA	gene	56727418	57079329	-	1.96657	5.42601	27.05	2.5318e-16	9.07652e-15	27.6064
ENSG00000198830.12	protein_coding	HMGN2	2	OTTHUMG00000003555.4	chr1	HAVANA	gene	26472440	26476642	+	-1.65314	6.24472	-27.1692	2.33861e-16	8.52068e-15	27.6029
ENSG00000132382.15	protein_coding	MYBBP1A	2	OTTHUMG00000090747.3	chr17	HAVANA	gene	4538897	4555386	-	-1.41791	6.75804	-27.2427	2.22719e-16	8.15922e-15	27.5992
ENSG00000135046.14	protein_coding	ANXA1	2	OTTHUMG00000020016.3	chr9	HAVANA	gene	73151865	73170393	+	1.00696	10.5319	27.6102	1.7484e-16	6.62256e-15	27.5817
ENSG00000123374.11	protein_coding	CDK2	1	OTTHUMG00000170575.2	chr12	HAVANA	gene	55966781	55972789	+	-1.76658	5.45753	-27.0138	2.59371e-16	9.19999e-15	27.5768
ENSG00000058804.12	protein_coding	NDC1	2	OTTHUMG00000008073.2	chr1	HAVANA	gene	53765478	53838463	-	-1.89567	6.28301	-27.0893	2.46617e-16	8.87928e-15	27.5507
ENSG00000138448.13	protein_coding	ITGAV	2	OTTHUMG00000132635.6	chr2	HAVANA	gene	186590010	186680901	+	2.13941	6.88452	27.1607	2.35181e-16	8.541e-15	27.5446
ENSG00000198056.16	protein_coding	PRIM1	1	OTTHUMG00000170034.8	chr12	HAVANA	gene	56730438	56752374	-	-2.95605	4.024	-26.8948	2.80873e-16	9.8376e-15	27.5367
ENSG00000138346.16	protein_coding	DNA2	2	OTTHUMG00000018352.6	chr10	HAVANA	gene	68414064	68472121	-	-3.32249	3.64818	-27.0084	2.60297e-16	9.20642e-15	27.5149
ENSG00000175216.15	protein_coding	CKAP5	1	OTTHUMG00000166599.5	chr11	HAVANA	gene	46743048	46846308	-	-1.35952	8.43321	-27.2868	2.16307e-16	7.95916e-15	27.4942
ENSG00000198736.13	protein_coding	MSRB1	1	OTTHUMG00000129143.2	chr16	HAVANA	gene	1938229	1943199	-	2.08451	5.36576	26.816	2.96152e-16	1.0202e-14	27.4551
ENSG00000167779.9	protein_coding	IGFBP6	1	OTTHUMG00000169773.4	chr12	HAVANA	gene	53097436	53102345	+	2.03329	6.3699	26.9622	2.68477e-16	9.435e-15	27.4551
ENSG00000108840.16	protein_coding	HDAC5	1	OTTHUMG00000181806.2	chr17	HAVANA	gene	44076746	44123702	-	1.75272	5.89482	26.8841	2.82903e-16	9.852e-15	27.4415
ENSG00000137857.18	protein_coding	DUOX1	2	OTTHUMG00000171987.4	chr15	HAVANA	gene	45129933	45165576	+	2.93904	3.81778	26.774	3.0464e-16	1.04514e-14	27.4378
ENSG00000147224.13	protein_coding	PRPS1	2	OTTHUMG00000022167.3	chrX	HAVANA	gene	107628428	107651993	+	-1.75736	6.07315	-26.8833	2.83049e-16	9.852e-15	27.4262
ENSG00000163781.14	protein_coding	TOPBP1	1	OTTHUMG00000159773.7	chr3	HAVANA	gene	133598175	133662380	-	-1.47449	6.58448	-26.9655	2.67882e-16	9.435e-15	27.4261
ENSG00000183347.15	protein_coding	GBP6	2	OTTHUMG00000010123.1	chr1	HAVANA	gene	89364059	89388160	+	2.71187	4.22163	26.6782	3.25001e-16	1.10368e-14	27.418
ENSG00000018408.15	protein_coding	WWTR1	1	OTTHUMG00000159614.13	chr3	HAVANA	gene	149517235	149736714	-	-1.90477	5.89809	-26.8394	2.91531e-16	1.00656e-14	27.4175
ENSG00000097046.13	protein_coding	CDC7	2	OTTHUMG00000047810.4	chr1	HAVANA	gene	91500851	91525764	+	-2.41708	4.45026	-26.666	3.27692e-16	1.10974e-14	27.4141
ENSG00000196363.10	protein_coding	WDR5	2	OTTHUMG00000131707.3	chr9	HAVANA	gene	134135365	134159968	+	-1.60717	6.08527	-26.8487	2.89704e-16	1.00419e-14	27.3973
ENSG00000139618.18	protein_coding	BRCA2	2	OTTHUMG00000017411.8	chr13	HAVANA	gene	32315086	32400268	+	-2.92401	4.79176	-26.6294	3.35905e-16	1.13153e-14	27.3867
ENSG00000158828.8	protein_coding	PINK1	2	OTTHUMG00000002841.2	chr1	HAVANA	gene	20633458	20651511	+	1.78285	5.80624	26.7813	3.03158e-16	1.04219e-14	27.3802
ENSG00000008853.18	protein_coding	RHOBTB2	1	OTTHUMG00000097827.3	chr8	HAVANA	gene	22987417	23020509	+	-3.41457	3.88403	-26.6862	3.23234e-16	1.09992e-14	27.3527
ENSG00000135446.17	protein_coding	CDK4	1	OTTHUMG00000170382.6	chr12	HAVANA	gene	57747727	57756013	-	-1.44594	6.63735	-26.8618	2.87176e-16	9.9749e-15	27.3486
ENSG00000161888.12	protein_coding	SPC24	1	OTTHUMG00000180798.2	chr19	HAVANA	gene	11131520	11155807	-	-3.16862	3.8457	-26.6373	3.34121e-16	1.12779e-14	27.3307
ENSG00000130713.17	protein_coding	EXOSC2	2	OTTHUMG00000020811.5	chr9	HAVANA	gene	130693721	130707288	+	-1.99002	5.26115	-26.5939	3.44079e-16	1.14981e-14	27.3123
ENSG00000171241.9	protein_coding	SHCBP1	1	OTTHUMG00000132540.5	chr16	HAVANA	gene	46578591	46621379	-	-2.95078	4.24841	-26.5126	3.63617e-16	1.20469e-14	27.3018
ENSG00000186847.6	protein_coding	KRT14	2	OTTHUMG00000133426.3	chr17	HAVANA	gene	41582279	41586895	-	2.58774	5.75013	26.607	3.41046e-16	1.14196e-14	27.2889
ENSG00000137440.5	protein_coding	FGFBP1	2	OTTHUMG00000097745.2	chr4	HAVANA	gene	15935577	15938740	-	1.17772	8.99659	27.0441	2.54166e-16	9.07753e-15	27.2877
ENSG00000144136.11	protein_coding	SLC20A1	1	OTTHUMG00000131317.5	chr2	HAVANA	gene	112645939	112663825	+	-1.73383	6.0012	-26.6641	3.2811e-16	1.10974e-14	27.2809
ENSG00000172725.14	protein_coding	CORO1B	2	OTTHUMG00000167775.4	chr11	HAVANA	gene	67435510	67443821	-	1.25914	7.65385	26.8857	2.82589e-16	9.852e-15	27.2705
ENSG00000112773.16	protein_coding	TENT5A	2	OTTHUMG00000015097.2	chr6	HAVANA	gene	81491439	81752774	-	2.1329	4.65897	26.4585	3.77274e-16	1.24093e-14	27.2628
ENSG00000135709.14	protein_coding	KIAA0513	2	OTTHUMG00000176597.2	chr16	HAVANA	gene	85027782	85094230	+	2.14641	4.69065	26.4027	3.91889e-16	1.28145e-14	27.2231
ENSG00000163811.12	protein_coding	WDR43	1	OTTHUMG00000152015.6	chr2	HAVANA	gene	28894667	28948219	+	-1.37551	6.8447	-26.7017	3.19883e-16	1.09073e-14	27.2159
ENSG00000130826.19	protein_coding	DKC1	1	OTTHUMG00000024242.11	chrX	HAVANA	gene	154762742	154777689	+	-1.55454	7.47865	-26.7466	3.10318e-16	1.06244e-14	27.1934
ENSG00000136048.14	protein_coding	DRAM1	1	OTTHUMG00000170447.3	chr12	HAVANA	gene	101877580	102012130	+	1.57783	5.83175	26.5107	3.64099e-16	1.20469e-14	27.1846
ENSG00000014216.16	protein_coding	CAPN1	2	OTTHUMG00000165614.2	chr11	HAVANA	gene	65180566	65212006	+	0.979452	10.4907	27.0272	2.57048e-16	9.13694e-15	27.1821
ENSG00000166897.16	protein_coding	ELFN2	2	OTTHUMG00000150558.4	chr22	HAVANA	gene	37367960	37427479	-	-1.85644	5.39486	-26.4227	3.86583e-16	1.26657e-14	27.1774
ENSG00000048162.22	protein_coding	NOP16	1	OTTHUMG00000163186.5	chr5	HAVANA	gene	176383946	176388927	-	-1.52957	6.26328	-26.5442	3.55898e-16	1.18458e-14	27.1657
ENSG00000228716.7	protein_coding	DHFR	2	OTTHUMG00000162529.3	chr5	HAVANA	gene	80626226	80654983	-	-1.66037	6.36257	-26.5158	3.6284e-16	1.20469e-14	27.1388
ENSG00000051341.15	protein_coding	POLQ	2	OTTHUMG00000159396.2	chr3	HAVANA	gene	121431431	121545988	-	-3.38451	3.61155	-26.4457	3.80555e-16	1.24927e-14	27.1383
ENSG00000095319.14	protein_coding	NUP188	2	OTTHUMG00000020768.7	chr9	HAVANA	gene	128947699	129007096	+	-1.29487	7.29144	-26.6207	3.37897e-16	1.13596e-14	27.1169
ENSG00000116161.18	protein_coding	CACYBP	1	OTTHUMG00000034941.8	chr1	HAVANA	gene	174999163	175012027	+	-1.52745	6.50869	-26.4824	3.71169e-16	1.22325e-14	27.0978
ENSG00000072501.19	protein_coding	SMC1A	2	OTTHUMG00000021614.7	chrX	HAVANA	gene	53374149	53422728	-	-1.4524	7.21306	-26.5515	3.54129e-16	1.18104e-14	27.0779
ENSG00000095002.15	protein_coding	MSH2	1	OTTHUMG00000128861.10	chr2	HAVANA	gene	47403067	47663146	+	-1.72253	5.76303	-26.3268	4.12778e-16	1.34712e-14	27.0694
ENSG00000075275.18	protein_coding	CELSR1	1	OTTHUMG00000150423.5	chr22	HAVANA	gene	46360834	46537620	-	1.27337	7.80735	26.6105	3.40232e-16	1.14152e-14	27.0663
ENSG00000138642.16	protein_coding	HERC6	2	OTTHUMG00000160983.6	chr4	HAVANA	gene	88378739	88443097	+	1.71446	5.77684	26.3115	4.17137e-16	1.3587e-14	27.0538
ENSG00000167553.17	protein_coding	TUBA1C	2	OTTHUMG00000169497.4	chr12	HAVANA	gene	49188736	49274600	+	-1.13673	9.02192	-26.7058	3.18991e-16	1.08991e-14	27.05
ENSG00000102189.17	protein_coding	EEA1	2	OTTHUMG00000170110.3	chr12	HAVANA	gene	92770637	92929331	-	1.90996	7.15707	26.4928	3.68555e-16	1.21703e-14	27.0486
ENSG00000130775.16	protein_coding	THEMIS2	2	OTTHUMG00000003735.6	chr1	HAVANA	gene	27872543	27886685	+	3.77054	3.79559	26.1926	4.52594e-16	1.45999e-14	26.9893
[truncated: 15,789 more rows]

## Sheet: KPch RMC7977 vs Veh
gene_id	gene_type	gene_name	level	havana_gene	chr	DB	Type	start	end	strand	logFC	AveExpr	t	P.Value	adj.P.Val	B
[truncated: 17,606 more rows]

[truncated: 2 more sheets: FC1242 RMC7977 vs Veh, KLA sgRNAs_MRTX1133 vs Veh]
