# Supplementary material
Source: Research Square preprint supplement (doi:10.21203/rs.3.rs-9085811/v1)
Supplement: Supplementary file 5 [file a327afc942290960d6800b23.xlsx]

## Sheet: CRISPR Screen Data
Columna1	Cisplatin1	CPT1	Etoposide	HU	IR	Doxorubicin	H2O2	MMS	Pyridostatin	UV	Bleomycin	Olaparib	AZD6738	Cisplatin2	Cisplatin3	ICRF	Formaldehyde	PhenDC3	Duocarmycin	Trabectedin	Calicheamicin	Gemcitabine	illudinS	MLN4924	MNNG	KBrO3	CD437	CPT2	BPDE	HU2	PladB
LIG4	-0.58	-0.37	-9.52	-1.31	-8.91	-7.66	-1.64	-0.56	-5.64	-0.57	-11.21	-1.56	-0.82	-0.17	0.71	-6.11	0.19	1	1.78	0.37	0.07	-0.3	-1.4	-0.91	-0.83	-10.67	-0.75	0.21	-0.9	-0.8	0.01
NHEJ1	0.43	-2.12	-9.96	0.76	-8.65	-5.28	-0.41	0.13	-5.58	0.2	-11.39	0.34	-2.4	-0.17	-0.19	-5.06	-0.04	-1.16	0.87	-0.05	-1.26	0.49	-0.29	-1.5	-0.41	-14.7	-1.08	0.79	0.64	-0.8	1
ATM	-1.02	-6.62	-5.96	0.75	-7.82	-4.49	-1.19	-2.82	-3.64	-0.39	-8.13	-5.47	-8.44	-2.47	-4.68	-2.04	0.61	0.58	-1.11	-0.97	-1.65	-1.23	-0.64	0.76	-4.85	-10.7	1.13	-15	-0.96	-0.94	0.33
SHLD2	0.37	0.63	-4.08	0.12	-6.72	-4.15	-0.74	-1.59	-4.49	-0.17	-3.94	-1.96	0.58	-0.36	-0.85	-1.28	0.72	-0.44	-0.59	0.41	-0.97	-0.08	0.01	-0.17	-1.48	-11.44	-1.23	-0.35	-0.16	-0.24	-0.73
PNKP	-2.27	-3.8	-2.94	-2.56	-5.48	-1.63	0.9	0.41	-0.29	-0.44	-0.47	-2.1	-1.45	-1.09	-1.46	-1.71	0.6	-1.24	1.68	0.84	0.58	0.26	-2.73	-1.37	-2.59	-5.82	-2.19	-5.19	-0.08	0.51	0.53
AMBRA1	-0.62	-3.16	-11.44	0.15	-5.27	-9.17	-1.92	-6.01	-5.78	-0.48	-0.5	-1.2	2.85	0.09	-1.12	-0.81	-0.58	1.17	-4.48	-4.31	-1.7	-2.64	-1.15	2.81	-6.02	-0.84	4.41	-3.83	1	-3.49	0.4
C7orf49	-2.44	-1.08	-4.48	-3.04	-4.89	-3.25	-0.45	-0.93	-3.36	-0.53	-2.81	-0.61	0.19	-0.89	1.06	-1.6	-0.28	0.51	0.43	-0.8	-2.13	-0.95	-0.39	-0.62	-0.03	-2.31	-0.43	-0.76	-1.26	-0.94	-2.38
SHLD1	-0.2	-1.2	-3.39	0.09	-4.84	-4.08	-1.63	-0.86	-4.77	-0.51	-4.29	0.51	1.05	-1.14	0.06	-2.81	1.46	-0.81	0.03	0.1	-1.74	0.13	-0.44	0.1	-1.79	-11.41	-0.48	-1.07	-0.3	-0.54	1.36
RNF168	0.7	-1.72	-4.18	1.22	-4.83	-3.29	0.13	1.16	-2.55	-0.29	-3.04	-0.04	-3.01	-0.52	0.74	-2.78	0.48	-1.23	-0.38	-1.27	-2.01	1.81	-1.99	-0.38	-0.08	-13.83	-0.4	-2.31	-2.51	-0.92	0.34
NBN	-11.79	-12.14	-8.32	-0.84	-4.81	-5.87	-0.58	-3.75	-7.41	-3.55	-2.98	-1.59	-1.52	-6.91	-5.9	-0.54	-0.54	1.81	1.79	0.65	-0.64	-0.37	-2.78	-0.2	-1.5	-6.1	0.46	-9.8	-1.28	-1.18	-1.1
XRCC4	-0.54	-0.06	-5.19	-2.17	-4.65	-4.76	-2	-1.68	-3.22	0.33	-10.64	-1.75	-0.04	-0.42	0.73	-3.19	-1.26	-1.06	0.31	-0.76	-1.03	-1.16	-0.59	-0.18	0.01	-9.59	0.46	1.84	-2.05	-1.01	0.39
MCPH1	-2.54	-3.52	-10.77	-1.69	-4.17	-4.13	-0.32	-2.02	-5.28	-1.09	-2.3	-1.29	-2.03	-3.42	-4.68	-6.64	-0.98	0.45	1.24	1.24	-0.27	-0.92	-2.44	1.02	-2.14	-7.18	-0.83	-2.14	0.71	-2.44	-1.25
MAD2L2	-5.64	-0.78	-3.14	-0.33	-4.12	-4.48	-1.53	-3.21	-3.62	-5.54	-4.58	0.4	-10.64	-11.07	-10	-0.38	-0.92	1.12	-1.99	1.63	1.23	0.77	-12.76	-2.61	-0.75	-11.7	-0.27	-0.02	-7.6	-0.1	1.16
RIF1	-1.49	-2	-3.18	-1.38	-4.04	-2.22	0.6	0.06	-1.9	-0.34	-3.82	-0.24	1.46	-1.53	-1.12	-1.15	-0.76	-0.69	-0.7	0.52	-0.41	-2.05	-0.66	-1.18	-0.44	-7.62	-0.82	-2.74	0.33	-0.97	-0.18
DCLRE1C	-0.38	-1.87	-3.87	0.5	-4.03	-3.86	-2.08	-1.2	-4	-0.97	-4.21	-0.53	0.26	0.59	0.28	-1.05	-1.84	-0.96	-0.25	-0.42	-2.92	-0.37	0.7	0.47	-0.51	-13.76	1.05	1.71	-0.19	1.25	0.74
SHLD3	0.15	-0.62	-3.37	-0.41	-3.86	-2.73	-1.12	-1.32	-2.17	0.07	-3.6	-0.97	-0.48	-0.4	-0.27	-1.93	0.43	-0.16	-0.26	-0.35	-1.29	0.06	-0.35	-1.26	-1.43	-15.01	-2.12	-0.13	-1.61	-0.78	-0.17
H2AFX	-2.54	-5.35	-7.79	0.78	-3.81	-4.81	0.66	-0.06	-4.06	0.42	-1	-0.27	-2.49	-0.13	-0.54	-2.45	0.3	1.06	1.06	1.14	0.22	1.68	-1.82	0.11	0.45	-3.22	0.49	-4.52	0.74	0.67	0.56
PRH2	-2.15	-2.87	-2.88	-2.26	-3.74	-0.31	-0.12	-0.63	-2.38	-1.4	-0.54	-0.82	0.64	0.33	-0.6	0.24	-0.5	0.34	-1.06	-0.21	0.18	-1.04	0.08	0	-0.28	-0.8	0.63	-0.63	0	-1.35	-0.08
ALDH1A1	-0.27	-1.6	-0.5	-2.22	-3.66	-1.2	-1.61	0.31	-1.22	-1.62	-0.22	-0.25	1.16	-0.31	0.92	1.08	1.27	0.45	0.71	0.22	-0.46	-0.49	0.61	0.36	-0.16	1.11	-0.23	-0.52	0.14	-0.62	0.3
TP53BP1	-0.24	-0.37	-2.45	-0.51	-3.59	-4.57	-1.37	-1.65	-2.99	-0.85	-7.43	-1.18	-1.91	0.37	0.93	-1.4	1.16	0.86	0.82	0.36	-0.74	-0.58	-0.74	0.2	-0.83	-8.8	-0.36	0.5	-0.89	0.46	0.64
ULK2	-1.45	-0.73	-0.79	-0.58	-3.59	-0.17	0.08	-0.33	0.1	-0.08	0.82	0.68	-1.64	-0.44	-1.22	0.19	0.24	0.45	-0.29	0.52	0.09	0.26	-0.73	-0.38	0.24	0.11	-1.43	-0.68	0.77	0.54	1.11
NSG1	-2.07	-3.21	-2.35	-2.42	-3.55	1.9	-1	0.52	0.92	0.43	-1.26	-0.78	-0.28	-0.44	-0.29	0.76	-0.71	-0.05	-0.36	0.01	0.42	-1.17	-0.62	-0.95	0.83	-0.38	-1.09	0.9	-0.21	0.36	0.95
MTBP	-1.54	-2.56	-0.28	-0.63	-3.52	-1.66	0.46	-1.83	-1.39	-0.33	0.58	0.65	-0.11	0.23	0.56	0.35	0.29	-0.74	0.97	0.5	1.14	-0.1	0.29	0.76	0.47	1.18	-0.29	-1.03	0.43	1.29	1.4
MUC20	-2.24	-1.04	-1.82	-1.62	-3.42	0.95	0.91	1.96	1.67	1.39	0.11	1.54	-0.92	-0.34	-0.14	0.96	0.94	0.55	0.09	-0.4	-0.6	0.01	-0.25	0.41	0.33	-0.17	0.05	-0.79	0.16	-0.88	0.1
KRT74	-2.89	-3.57	-2.69	-2.29	-3.39	-1.02	-0.01	-0.81	-0.89	0.74	0.72	-0.98	0.94	0.07	-0.2	-0.19	-0.94	-0.41	-0.63	-1.52	-0.93	-0.38	0.77	-0.52	0.16	-0.02	1.09	0.22	-1.34	-0.47	-0.47
SLC31A1	-0.81	-1.99	-0.27	-0.63	-3.39	0	-0.45	-0.88	0.69	-0.13	0.22	0.16	0.72	-1.25	0.24	-2.83	-0.62	0.66	0.52	0.02	-0.71	0.09	-2.03	-0.9	-0.12	-0.37	-2.09	-0.57	-0.16	-1.8	-3.98
UPK1B	-2.84	-1.08	-1.88	-2.15	-3.34	-0.11	-0.83	-0.86	-0.35	0.28	-1.31	0.69	-1.33	0.27	-0.7	1.67	-0.52	-0.72	-0.1	0.07	-0.41	0.22	0.63	0.25	0.36	-0.11	-0.93	-0.38	1.39	-0.25	2.55
NAA30	-2.42	-6.05	-2.03	-6.36	-3.33	-1.47	2.43	-5.28	0.13	-6.22	-1	-0.32	2.02	-5.46	-5.54	-2.89	1.82	3.83	2.61	2.03	1.21	-1.2	-0.2	3.32	-5.95	-1.76	-3.61	-5.27	-0.5	-5.53	0.22
BLCAP	-1.07	-2.22	-1.63	-1.72	-3.32	-0.17	1.15	2.08	1.41	0.5	0.67	0.67	0.49	0.65	0.46	-0.5	1.41	0.59	-0.56	0	-0.03	0.35	0.04	0.35	1.47	0.03	-0.91	0.24	1	1.14	1.34
PKP3	-0.62	-0.13	-1.35	-1.35	-3.31	1.56	2.16	2.53	0.93	0.84	0.56	0.54	0.79	0.19	-0.69	1.64	-0.09	0.19	0.06	0.36	0.3	0.2	1.97	0.99	2.22	1.98	2.13	-0.04	-0.05	0.57	-0.15
ELMSAN1	-1.28	-0.58	0.33	-0.7	-3.29	-0.22	-1.78	-2.6	-1.62	-0.05	0.27	-1.05	-0.71	-0.65	-1.9	-0.11	-1.32	-0.16	-3.49	-0.8	-0.47	-0.73	-2.5	-0.82	-0.61	-1.31	0.69	-1.97	-0.05	-2.86	-0.92
DIRAS1	-0.78	-1.3	-1.25	-1.29	-3.28	-0.03	-0.24	0.13	-0.51	0.56	1.43	-0.17	0.12	0.29	-0.23	0.15	0.33	-0.1	-0.51	-0.37	-0.39	1.68	-0.42	-0.39	-0.23	-0.46	-0.97	0.11	-0.26	0.87	-0.38
KIF4A	-3.08	-2.23	-2.26	-2.23	-3.28	-3.95	-0.99	-3.12	-1.22	-3.19	1.19	0.28	-0.65	-0.82	-1.19	-0.91	-1.02	0.14	-0.31	-0.79	-0.58	-0.31	-1.59	-2.29	-2.22	-0.5	-0.41	-2.7	-1.76	-1.99	-2.24
DNTTIP1	-2.37	-1.96	-0.2	-1.66	-3.22	-1.23	-2.98	-3.43	-2.42	-2.12	-0.38	-1.1	-3.28	-1.66	-3.29	-0.17	-1.22	-1.06	-2.54	-1.61	-1.78	-0.64	-3.45	-1.97	-2.14	-3.73	-1	-4.26	0.9	-3.31	-0.45
STAG2	-2.21	-5.1	-2.39	-0.4	-3.22	-4.82	-0.48	-2.48	-2.33	-1.22	1.47	0.26	-0.04	-1.77	-2.6	-4.84	-1.46	0.21	-2.62	-2.99	-3.43	-1	-4.49	-0.22	-3.35	-2.27	0.55	-8.55	-1.39	-1.42	-0.14
MAN1A2	-1.75	-2.72	-2.11	-2.58	-3.2	-0.44	-0.67	-1.55	-0.57	-1.52	1.25	-0.82	-0.64	0.37	0.38	0.39	-0.55	0.52	0.2	-0.68	-0.31	1.45	-0.64	0.44	0.16	-0.16	0.61	1.02	-0.63	0.39	-0.33
BRCC3	0.29	0.63	-1.66	0.03	-3.17	0.36	2	1.72	0.61	1.91	-1.11	-1.07	1.14	1.44	0.69	-0.52	0.74	0.66	-0.94	-0.23	0.72	0.52	2.13	0.05	0.85	-2.9	1.78	0.52	0.27	-0.19	0.8
CKAP2	-3.24	-1.79	-1.82	-4.33	-3.17	-0.43	1.36	-0.92	-0.57	0.24	-2.04	-0.87	-0.64	-1.89	-1.37	0.97	0.88	-0.65	-1.22	-1.01	-1.18	-0.96	-3.21	-3.17	-0.68	-0.85	-1.91	-1.96	-1.69	-3.85	0.15
ATG3	-1.73	-1.33	-1.55	-1.61	-3.14	-1.46	-0.16	-1.18	-0.81	1.03	-2.04	1.31	-0.83	0.23	-1.12	-0.98	-2.16	-0.06	-1.31	-0.34	-0.74	-0.73	-2.41	-2.1	0.25	0.35	-1.33	1.18	-0.09	0.14	-0.34
NPC1L1	-0.63	-1.21	-1.33	-0.94	-3.14	-1.42	0.42	1.3	-0.57	-0.78	0.21	1.46	0.09	0.95	-0.39	-0.09	-1.33	-0.66	0.6	0.62	0.84	0.96	0.55	0.21	1.72	-0.35	-0.51	-0.07	0.58	-0.22	-0.24
CAB39	-1.06	-4.6	-3.27	-1.25	-3.13	-7.16	-10.85	-5.27	-5.51	-8.79	-1.73	-1	1.16	-1.7	-1.93	-3.96	-0.97	-4.43	-3.71	-2.63	-2.02	-4.65	-0.41	-6.95	-0.76	-4.08	-1.69	-6.81	-2.87	-6.72	0.77
SP3	-0.69	-1.03	-1.22	-2.56	-3.13	-0.03	1.22	1.36	1.17	0.33	1.49	0.27	-1.73	-0.31	-0.01	-0.77	0.26	-0.65	-0.51	-0.27	-0.97	-0.16	1.07	-3.64	2.64	0.26	0.34	-0.51	2.25	-0.62	1.75
ZFR	-0.84	-1.25	0.14	-2.1	-3.11	1.56	0.22	1.11	2.52	-1.05	1.26	1.28	0.9	0.17	0.47	0.2	0.41	-1.43	-0.08	2.01	1.79	-0.82	-0.11	-2.17	1.35	0.53	-0.37	0.45	0.08	-0.83	1.1
TSPAN32	-2.73	-0.48	-2.55	-1.96	-3.1	-0.36	0.04	-0.38	0.43	0.41	-1.06	-0.87	0.75	1.04	0.83	0.11	0.28	0.26	0.27	-0.58	0.24	-0.19	0.11	0.56	0.11	0.1	1.08	0.27	0.47	0.06	-0.17
RAD1	-4.35	-2.5	-4.81	-4.96	-3.09	-2.95	-0.55	-5.06	-2.56	-5.81	-1.58	-0.67	-13.28	-8.42	-5.36	-3.08	-0.12	1.4	-2.52	2.05	0.77	-10.42	-8.5	-4.24	-5.77	-7.33	-9.51	-1.23	-6.49	-5.68	-1.43
PNPLA6	-1.95	-1.3	-2.41	-1.77	-3.08	-0.29	0.62	-0.16	0.17	-0.45	-0.36	1.04	0.04	-0.2	-0.33	0.16	-0.16	0.98	-0.15	-0.55	-0.26	0.73	-0.27	-1.25	-0.54	0.29	0.46	0.19	-0.45	-0.56	0.8
SUGP2	-1.43	-0.38	-2.38	-2.01	-3.08	-0.79	-1.91	-1.55	-2.16	-1.4	-1.12	-1.27	0.25	-1.45	-0.09	-0.4	1.75	1.69	-0.29	-1.01	-1.07	-1.5	-0.67	-0.51	-1.72	-0.8	1.13	-0.16	0.42	-0.34	0.29
GYG2	-0.79	-2.06	-1.88	-0.6	-3.07	-0.62	-0.51	-0.83	0.04	-0.72	0.58	-0.23	1.43	0.93	1.93	0.14	-1.56	-1.39	-1.7	-2.01	-1.84	0.12	0.35	0.27	-0.13	0.69	0.68	0.48	-1.31	-0.13	-1.23
CAND1	0.73	-1.63	1.68	2.46	-3.01	4.3	2.87	-1.44	12.82	-4.65	-2.11	-1.89	-1.57	-3.98	-2.84	-4.6	1.74	-3.6	-6.37	-2.51	-0.22	-0.79	-0.07	-12.11	-8.46	-9.82	-10.57	-3.28	-5	-6	-2.69
NFU1	-1.44	-0.22	-1.09	-0.86	-3.01	0.25	0.5	0.82	-1.19	-0.55	-1.6	-0.15	0.96	-0.4	1	0.16	1.82	1.92	1.81	1.91	1.46	1.07	0.9	-0.45	2.03	1.79	0.99	0.87	0.3	0.11	0.83
CYP2R1	-1.88	-2.97	-2.19	-3.41	-2.99	0.45	0.66	1.12	-0.26	0.27	0.75	-0.7	1.15	0.12	0.63	-0.06	-0.03	-0.32	-0.23	-0.69	-0.6	-0.01	0.55	0.63	-0.79	0.37	0.44	0.51	0.22	0.7	0.46
GSG2	-0.3	-1.14	0.17	-1.06	-2.97	0.45	-0.93	-1.05	-0.88	-0.98	0.51	0.33	-1.15	-1.45	-0.42	0.79	1.85	1.8	0.75	0.29	1.51	-0.16	0.34	-3.71	0.59	0.66	-1.19	-0.5	-0.84	-0.42	-2.45
SUPT3H	-2	-1.8	-1.13	-0.76	-2.96	0.07	-1.21	-2.03	-1.39	-2.35	-1.66	-1.28	-0.05	-1.24	-0.91	0.55	0.3	0.18	0.11	0.11	0.24	-1.39	-2.65	-2.27	-1.54	-2.35	-2.96	-0.39	-1.63	-2.19	-4.67
TRMU	-0.31	-0.75	-0.73	0.37	-2.95	-0.38	-0.04	-0.82	0.48	-0.63	-0.58	-0.8	-0.88	-0.88	0.29	-0.88	-1	0.17	-0.39	-0.36	0.65	-1.06	-0.06	0.07	0.37	0.94	0.23	1.05	1.43	0.23	0.7
SIPA1L3	-1.84	-0.45	-0.74	-1.15	-2.93	0.28	0.65	2.39	0.12	0.95	-0.19	-0.73	-0.4	0.52	-0.04	-1.2	0.79	1.21	-0.67	0.32	-0.31	1.58	0.65	-0.97	0.81	-0.67	0.82	-0.41	0.8	1	2
CARD8	-2.48	-2.16	-1.73	-2.15	-2.9	-0.98	0.06	-0.47	-0.43	0.11	0.29	-1.08	0.18	-0.92	-0.09	0.19	1.15	1.92	-0.23	-0.22	-0.69	0.07	0.81	0.83	0.17	0.83	0.66	-0.45	0.04	-0.59	-0.04
OR9K2	-2.38	-3.01	-2.14	-1.88	-2.89	-1.13	1.84	0.44	0.58	0.2	-0.83	-0.61	-1.2	-0.71	-0.05	1.08	0.35	-1.43	0.11	0.58	1.21	-0.5	-0.29	-1.01	0.74	0.16	0.33	-0.85	0.02	0.4	1.22
COPZ1	-2.16	-0.18	-1.07	-2.04	-2.88	-1.04	-0.47	-0.87	-1.35	-0.06	0.17	0.71	-1.46	-1.26	0.32	1.18	-1.05	-1.01	0.09	-1.24	-1.28	0.36	-0.75	-2	-2.82	-1.29	-1.06	0.51	-0.43	-0.85	-3.93
EMP3	-0.8	-1.33	-1.81	-0.02	-2.87	0.59	1.07	-1.29	0.26	-0.7	-0.26	1.5	0.63	0.05	0.68	0.03	0.01	0.21	0.23	-0.65	-0.6	-0.14	-0.81	-0.37	-1.68	-0.9	-0.97	1.03	0.27	-0.53	0.02
ZFP82	-0.63	-1.76	-1.13	-1.88	-2.87	-2.17	-0.63	-0.7	-1.47	-0.88	0.27	-0.89	2.31	0.19	-0.37	-0.55	0.64	1.5	0.36	-0.65	-0.58	-0.74	-0.53	0.1	-1.73	-0.25	-1.38	0.07	-1.71	0.59	1.5
RERGL	-0.93	-2.53	-0.87	-0.94	-2.86	-0.22	-1.19	0.21	-0.59	-0.46	0.16	0.99	0.94	-0.13	-0.5	0.49	-0.4	-1.07	-0.78	-0.03	0.68	-1.37	-0.37	-0.32	0.4	-0.47	-1.3	-0.12	0.16	-0.36	1.04
ATP8B1	-2.67	-1.64	-3.56	-2.42	-2.85	-4.33	-5.83	-2.39	-5.6	-0.5	-0.79	-1.12	-0.32	-1.27	-1.76	0.39	-0.57	-1.87	-1.13	-1.54	-4.7	-0.72	-7.98	-2.97	-1.55	-1.29	-0.77	-0.34	-1.24	-0.1	-0.9
SFPQ	-1.64	0.39	-0.74	-0.78	-2.85	1.58	0.86	0.78	0.49	0.16	1.37	0.02	-1.02	0.61	-0.05	0.9	-0.82	1.49	0.61	0.38	0.62	2.2	0.54	0.76	-0.01	0.58	1.05	0.07	1.39	-0.71	0.98
SMAD4	-1.24	-4.4	-6.51	-1.28	-2.84	-5.61	-1.09	-4.09	-3	-5.12	-0.66	-1.76	3.27	0.68	0.25	-0.71	-0.59	1.87	-3.14	-2.69	-3.54	-3.08	-3.68	6.31	-2.53	0.35	-0.97	-5.15	-3.08	-3.51	-0.01
TRIM56	0.4	0.33	-0.26	0.31	-2.84	-0.15	1.11	1.06	-0.26	0.59	0.74	1.5	-0.99	1.35	-0.13	-0.12	0.44	1.75	1.02	0.97	1.08	0.66	0.75	1.14	1.93	1.74	1.17	-0.42	1.05	0.59	1.27
DDX42	-1.34	-2.02	-1.17	-1.13	-2.82	-0.16	0.54	-2.02	-1.78	-0.94	-0.06	0.33	-4.2	-0.49	-0.01	1.01	-0.17	-0.53	2.13	0.97	-0.47	-0.88	-0.37	-1.61	-3.62	-2.47	-6.42	-0.82	0.1	-0.43	0.87
C7orf69	-1.36	-1.82	-0.81	-0.65	-2.81	0.44	1.95	0.77	0.48	-0.05	-0.81	-1.07	-0.72	-0.51	1.36	1.64	-0.35	-0.46	-1.05	-0.79	-0.72	1.6	-0.53	-0.77	-1.08	-1.21	-2.53	0.16	0.14	0.12	1.15
MPI	-1.46	-2.46	-0.86	0.04	-2.81	-0.17	0.56	-0.61	-0.6	0.48	-1.74	-1.23	-0.8	-0.55	0.35	0.13	-0.21	0.91	0.02	0.03	0.14	0.75	-0.29	2.25	-0.98	0.55	2.83	-0.56	-0.94	0.6	-0.98
UCN3	-1.38	-2.29	-1.61	-1.58	-2.81	1.3	0.31	0.54	0.59	0.33	1.11	0.28	-0.31	-0.28	0.55	-0.76	0.42	0.01	-1.39	-0.57	-0.57	-0.25	0.97	0.33	0.43	-0.01	0.6	1.47	0.51	0.42	-0.25
PCGF1	-1.23	-1.92	-2.61	-2.01	-2.8	-1.91	-2.85	0.55	-3.12	-0.23	-2.14	-0.03	0.72	-1.75	-1.49	-3.37	-0.75	-3.53	-1.83	-0.39	-2.52	-1.52	-1.82	1.89	1.14	-1	-1.75	-0.32	0.44	1.59	3.03
CDCA5	-2.12	-0.48	-1.29	-0.12	-2.79	-1.44	-0.52	-3.05	-1.44	-1.38	-0.08	1.06	-0.82	-0.84	-3.01	0.1	1.91	2.13	0.09	-0.39	-0.13	0.37	-2.53	-4.45	-1.08	-1.25	-1.73	-0.98	-0.52	-0.05	0.66
KLHL4	-1.18	-1.68	-1.86	-1.5	-2.79	-0.63	-0.89	-1.24	-1.48	0.52	-2.33	-1.06	-0.67	0.61	0.11	-4.07	1.26	-0.05	-0.35	-0.93	-1.06	-0.36	1.01	0.98	-0.13	1.09	-0.21	-0.36	-0.19	0.22	-1.13
ZNF484	-1.64	-1.69	-0.8	-1.3	-2.79	-1.58	-0.51	-0.01	-1.51	-0.19	-0.52	0.65	0.65	-0.1	0.72	1.16	-2.92	-0.93	0.12	-0.29	-1.1	0.26	-0.58	-0.46	-0.36	-0.56	0.38	0.38	-0.54	-0.52	0.61
PPEF2	-1.16	-0.26	-0.61	-0.85	-2.78	1.12	0.89	0.87	0.33	0	-1.04	-1.78	0.97	-0.96	-0.6	0.68	-0.07	0.16	0.24	-0.68	0.18	-0.71	1.02	0.42	0.25	1.32	0.84	-1.17	0.47	-0.27	-0.71
TRIM28	-0.85	-1.53	-2.46	-1.22	-2.78	-1.14	-0.27	0.47	-0.07	-1.01	-1.12	0.2	0.19	0.69	0.48	-0.98	0.05	2.27	-0.07	-0.63	-1.52	-0.41	-3.16	-0.15	-1.65	-0.39	-1.42	-0.68	0.03	0.15	-0.1
ZC3H18	-0.95	-0.26	-1.95	-0.99	-2.78	-0.77	-1.35	-1.16	-1.67	-2.79	-1.71	-0.66	-0.95	0.77	-0.07	0.96	0.07	1.35	-1.28	0.93	0.79	-0.66	-0.92	-0.58	-1.11	-0.73	0.2	0.57	-0.59	-1.1	-1.45
MEX3D	-0.82	-0.67	-2.23	-0.41	-2.77	-1.45	-0.27	-0.23	-0.71	-0.33	-0.81	-0.36	0.05	-0.53	-0.87	1.24	-1.5	-1.97	-0.85	-0.92	-0.59	0.03	1.43	-0.71	-0.46	-0.25	0.62	0.03	0.64	-0.52	-1.08
NKX2-2	-2.43	-0.42	-0.57	-1.9	-2.77	-2.24	-0.42	-0.81	-0.5	-1.08	-1.5	0.04	0.23	0.26	-0.2	0.39	1.03	0.45	-0.15	-1.08	-1.48	-0.37	-0.38	-0.55	-0.28	-0.48	-0.01	-0.76	-0.09	-0.43	0.66
OMA1	-1.14	-1.79	-2.09	-2.51	-2.77	-1.66	-1.95	-1.03	-2.49	-0.94	-0.27	-0.37	0.25	0.22	0.28	-0.01	0.18	0.53	0.55	0.5	0.19	0.61	0.63	-0.18	1.39	0.05	0.53	1.18	0.07	0.96	0.67
TCN1	-1.19	-1.13	0.03	-0.89	-2.77	-0.52	-1	-0.4	-1.66	-1.63	-0.49	-0.19	1.2	0.66	0.84	-0.48	-1.36	-0.78	-1.92	-0.07	-0.4	-0.19	1.69	1.17	2.07	1.71	1.77	1.18	1.62	0.07	0.71
RAB41	-2.71	0.51	-1.76	-2.27	-2.76	1.36	0.41	0.87	1.5	0.96	-0.13	0.61	0.5	-0.38	0.82	-0.34	-1.22	-0.58	-1.47	-1.2	-1.17	-0.46	0.27	0.32	-0.63	0.27	-0.12	-0.67	0.97	-0.16	0.73
MMACHC	-3.18	-1.95	-1.08	-2.8	-2.75	-1.17	-0.29	0.28	-0.73	-0.22	-1.18	-1.45	0.06	1.27	-0.06	-2.01	-0.49	0.09	-0.83	-1.21	-1.47	-0.79	1.97	0.65	0.79	0.8	0.69	1.52	0.2	1.23	0.01
PRELP	-1.84	-1.09	-0.45	-1.14	-2.75	0.1	-0.6	1	0.33	-0.61	1	-0.48	-0.23	-0.09	0.58	0.68	-1.94	-0.86	0.15	0.39	0.41	1.66	-0.29	0.43	0.34	0.51	0.97	-0.87	1.78	0.85	0.77
PTER	-2.71	-0.37	-2.87	-3.29	-2.74	-0.43	0.04	-0.17	-0.13	-0.09	0.32	-0.24	0.79	-0.78	0.46	0.43	0.24	0.23	0.19	0.15	0.14	1.4	1.6	0.47	1.49	1.5	1.03	0.05	1.19	0.4	0.95
SMC4	-1.92	-2.24	-1.54	-2.22	-2.74	-0.04	1.5	0.78	0.89	1.37	-0.4	-0.75	0.83	0.42	0.57	0.76	0.67	0.55	0.98	2.09	2.31	-0.58	-0.73	0.17	0.18	0.44	0.08	1.07	0.33	-0.55	-0.81
TMEM17	-0.43	-0.64	-0.07	-0.92	-2.74	0.26	0.92	-0.34	0.76	0.15	0.05	0.42	1.52	0.37	-0.46	0.2	2.18	2.33	0.72	0.75	0.38	-1	0.81	0.25	0.85	0.48	1.18	-0.93	1.62	0.77	1.24
TYW1	0.48	-1.74	-0.45	0.03	-2.74	1.48	1.1	1.68	0.74	2.36	0.38	-1.22	0.45	-0.67	-0.09	0.49	1.04	-0.57	-0.2	0.12	-0.63	-1.06	0.07	1.73	0.74	1.01	1.13	-0.06	-1.61	-0.02	-1.12
TBC1D20	-0.82	-0.68	-0.24	-1.08	-2.72	0.59	0.72	0.37	-1.35	0.68	-0.69	-1.2	0.54	-0.27	-1.23	0.92	0.25	-3.24	0.19	0.29	0.1	-0.99	0.42	-3.66	0.22	2.39	-0.44	0.7	0.99	0.99	1.19
KLHL22	-2.48	-0.19	-2.67	-2.24	-2.71	-0.23	0.46	-0.14	-0.2	0.84	-2.28	-0.65	-1.96	-0.14	0.09	-0.85	-0.13	0.19	-0.55	-0.05	0.3	0.33	-0.09	0.52	0.42	0.59	0.07	-1.05	-0.55	0.17	-0.62
MAGEA11	-1.24	-1	-0.9	-1.15	-2.71	-0.62	-0.14	-0.61	0.09	0.57	-0.05	-1.02	0.52	-0.55	0.64	-0.25	-0.45	-0.71	-0.39	0.41	0.3	-1.04	0.8	0.28	1.47	0.58	2.07	-0.54	0.06	-0.59	-0.5
CCDC47	-1.94	-1.48	-3.23	-1.6	-2.7	-2.01	0.53	0.79	0.09	1.18	0.4	-0.69	0.06	0.79	0.16	0.99	-0.11	-0.8	-0.99	-0.68	-0.56	-0.53	0.89	0.43	0.43	0.84	0.6	0.21	-1.26	-0.81	-2.43
MDS2	-1.28	-1.71	-2.46	-2.99	-2.69	-0.63	-0.54	0.28	-0.23	1.85	0.79	1.65	0.55	0.48	-1.15	0.73	-0.47	0.28	-0.18	0.3	0.81	1.44	0.23	-0.27	-0.37	-0.72	-0.81	-0.65	0.69	0.96	0.15
PAN2	-1.14	-0.8	-1	-2.48	-2.69	-0.43	-0.19	-1.24	-0.15	-0.44	-3.44	-1.55	0.09	-0.18	1.12	-1.08	-2.7	-2.27	-2.78	-2.31	-3.3	-1.27	-3.21	1.71	-2.14	1.61	-1.14	-1.96	-1.01	0.63	1.4
AJUBA	-1.13	-0.51	-0.57	0.14	-2.68	-0.68	0.71	0.19	0.62	0.66	-0.9	-0.94	-0.36	0.29	-0.73	-0.11	0.13	1.1	-0.28	0.16	0.27	0.33	-0.67	-0.79	-0.67	0.34	0.47	0.94	-0.68	-0.75	1.09
PTPN3	-1.6	-0.49	-1.98	-2.12	-2.68	-1.09	0.91	-0.52	-0.01	-1.18	1.1	-0.12	0.31	-0.22	0.34	-0.17	-0.66	0	-0.12	-0.04	-0.15	0.19	1.83	0.63	1.06	0.65	0.64	-0.11	-0.09	-0.14	-0.32
AGXT	-1.28	-0.48	-1.88	-0.27	-2.66	1.08	0.25	0.19	0.2	0.54	-1.89	-1.5	0.5	0.13	-0.64	0	-0.2	-0.42	0.78	0.71	-1.04	-0.33	0.16	-0.72	0	-0.25	-0.73	-0.97	1.01	1.28	2.13
ASB8	-1.12	-0.17	-0.47	-1.76	-2.66	1.55	-1.07	-1.65	0.27	-0.53	-0.75	0.89	0.07	0.82	-0.46	-0.42	-0.74	-0.51	-0.05	-0.62	-0.7	-1.34	0.79	-0.78	0.07	-1.67	-0.77	0.17	-0.5	0.37	-0.36
C2orf53	-2.37	-0.24	-0.93	-1.77	-2.66	0.43	1.64	0.14	0.42	0.78	0.44	0.82	-0.52	0.73	-0.01	-0.22	-0.33	-1.4	0.04	0.52	1.7	-2.08	0.91	-0.26	0.86	-0.52	0.32	0.77	1.69	-0.23	1.23
GORASP1	-3.54	-0.9	-1.77	-2.23	-2.66	-0.13	-0.03	0.09	0.55	0.54	0.39	1.7	0.61	-0.41	-0.31	0.25	-0.64	-1.07	-1.11	0.08	-0.72	1.7	-0.5	-0.39	-0.06	-0.52	-0.7	-0.65	-0.85	-1.18	-0.42
RHNO1	-1.6	-1.79	-2.73	-2.41	-2.65	0.31	-0.62	-0.57	-0.16	0.1	-0.18	-1.57	-2.69	0.13	-1.54	-0.73	-0.2	-1.5	-0.77	1.15	-0.23	-0.97	-0.32	0.78	-0.56	-1.53	0.73	-1.59	-0.82	-2.57	-1.8
FAM124B	0.67	-0.34	-0.07	0.54	-2.64	0.09	-0.48	0.45	-0.07	-0.63	-0.12	-0.56	0.27	-1.14	-1.43	0.12	1.49	0.63	0.25	0.76	0.83	-1.22	0.26	-0.26	-0.14	0.31	-0.65	-0.52	0.69	0.19	0.44
ANKLE1	-1.64	-0.96	-0.48	-2.45	-2.63	0.73	0.86	0.51	0.87	0.07	1.06	1.88	-0.02	0.23	-1.14	-0.26	-2.55	0.54	0.58	0.47	-0.4	0.2	-1.39	-0.56	-0.02	-0.17	0.12	-0.45	1.28	0.46	-1.04
HAP1	-1.69	-2.25	-0.91	-2.11	-2.63	0.16	0	-0.13	0.97	-0.61	1.03	1.17	0.57	-0.25	-0.27	0.38	0.59	-0.99	-1.01	-1.49	-1.05	0.75	0.09	0.25	0.75	0.75	1.72	-1.37	1.36	0.55	1.28
PDE1B	0.66	0.45	-0.37	-0.6	-2.63	0.64	0.42	0.01	0.55	-0.48	0.03	0.11	0.71	0.88	0.54	0.82	0.29	0.01	0.3	0.6	1	-1.33	0.03	0.47	0.32	-0.03	-0.76	-0.3	1.72	0.19	1.77
ZNF423	-0.23	-1.32	-0.87	0.33	-2.63	1.7	0.92	1.06	0.99	1.48	-0.22	-0.05	-1.21	-0.01	0.09	-1.78	-0.84	-1.73	-1.08	-0.76	-1.05	1.15	0.37	-0.01	1.72	1.05	1.4	0.33	-1.68	-0.71	-0.34
TTBK1	0.54	-0.39	-0.29	-1.43	-2.62	-1.61	0.1	-0.26	-1.23	-2.44	-0.08	-0.45	0.55	-0.43	0.66	-0.5	1.65	0.38	1.14	1.25	0.96	0.39	-0.55	-0.54	-0.03	-1.09	-0.09	0.02	0.06	-0.67	-0.97
ATPIF1	0.35	-1.45	0.43	0.23	-2.61	-0.28	1.01	0.83	0.4	-0.35	0.39	0.35	0.22	-0.49	0.62	0.41	-1.46	-1.36	-1.83	-0.15	-0.72	-1.33	-0.16	0.3	-0.25	-0.73	0.27	-0.17	0.34	0.38	1.14
MAPK11	-0.97	-2.34	-0.45	-0.71	-2.61	-0.54	-0.48	0.7	-0.04	-0.42	-0.37	1.01	1.94	-0.09	0.21	-0.68	-1.3	-0.4	0	-0.05	0.51	-0.82	-0.65	-0.43	0.14	1.06	-0.51	-0.06	0.59	-0.65	-0.44
TBC1D7	-1	0	-1.65	-1.14	-2.61	-0.55	0.66	0.7	0.28	0.22	1.02	-0.88	-1.14	1.64	2.22	0.04	0.88	0.35	-1.43	-0.51	-1.59	-1.7	1	-0.44	-0.07	-0.08	-0.02	0.93	0.59	-0.65	0.66
C12orf60	-2.31	-2.27	-2.41	-2.35	-2.6	-2.18	-0.62	-1.02	-1.24	-1.6	0.16	-0.44	1.31	-0.62	-0.23	-1.6	-0.8	-1.29	0.32	-1.04	-0.88	-0.06	0.37	0.5	0.28	0.46	-0.2	-0.82	1.22	0.31	1.1
CTAG2	-0.37	0.47	-0.84	-0.31	-2.59	0.42	2.01	0.6	-0.61	1.26	0.92	1.99	-0.22	0.32	0.15	0.56	-0.78	-1.11	-0.88	-1.07	-0.78	-0.85	-0.23	-0.21	-1.21	-0.64	-0.62	0.32	-0.5	-1.42	-2.01
FAAH	-0.41	-1.89	-1.15	-1.5	-2.59	0.84	1.32	0.14	1.14	1.01	-2.82	-2.02	0.35	0	-0.28	1.73	-0.35	0.11	0.89	-0.08	0.5	-2.29	-0.11	-0.1	-1.21	-0.74	-0.9	0.92	-0.89	0.72	0.18
MMRN2	-1.28	-0.11	-0.96	-2.27	-2.59	0.02	-0.87	0.26	-1.77	-0.11	-2.05	-0.25	0.7	-0.28	0.92	-1.09	-0.42	0.58	0	-0.42	-0.15	0.28	0.69	0.31	-0.78	-1.25	0.08	-0.03	-0.1	0.85	-1.7
ZNF514	-1.52	-2.15	-0.81	-2.7	-2.59	-0.52	-0.69	-0.46	-0.34	-0.2	-0.27	-1.12	0.05	-0.95	0.04	-0.93	0.72	0.13	0.63	-0.77	-0.24	0.45	0.39	0.22	-0.27	0.67	-0.22	-0.15	0.29	-0.24	0.2
CACNA1S	0.03	-0.69	-1.01	0.12	-2.58	1.1	0.95	2.5	1.79	1.39	-0.65	-0.76	-0.22	0.04	0.35	2.34	0.14	1.03	1.13	1.16	0.53	-1.61	-0.3	-0.84	-0.12	0.2	-1.16	0.6	0.5	-0.49	0.22
MOGAT3	-0.9	-0.4	-0.03	-0.98	-2.58	-0.35	0.41	0	-0.86	1.23	-0.47	0.86	0.19	-1.09	-0.86	-0.29	-0.23	-0.43	-0.03	-0.41	0	-0.97	-0.44	-0.52	0.19	-0.45	0.03	-0.16	-0.35	0.17	0.76
PHIP	-3.35	-1.29	-0.52	-2.96	-2.58	1.51	-1.21	0.49	-1.39	-0.79	-1.68	0.52	0.46	-0.65	-0.8	-2.69	-0.82	-3.62	-1.02	-1.09	0.32	-1.6	2.09	0.03	1.26	-0.26	-0.93	1.03	-0.37	-0.79	-0.36
CELSR2	-0.06	-0.78	-0.12	-0.32	-2.57	0.13	0.91	-0.56	-0.17	0.29	-2.62	-1.51	-0.02	0.99	1.5	0.14	-0.92	-1.41	-0.43	0.2	0.07	-0.26	-0.55	0.88	0.22	-0.9	-0.09	-0.52	0.35	0.15	-0.15
SELK	-0.07	0	0.05	-1.48	-2.57	0.92	-0.25	0.11	1.27	0.41	-1.07	-1.13	-0.56	0.93	0.54	-0.01	1.07	1.05	0.86	0.46	0.66	-0.78	1.56	0.92	0.66	2.2	0.83	1.57	-0.05	-1.36	-1.54
ARIH2	-1	-0.71	-1.17	-1.62	-2.56	-1.65	-0.41	-0.32	-0.52	-0.97	-1.54	-0.34	-0.3	-0.42	-0.93	-1.72	-1.64	-3.06	-1.41	-1.58	-1.93	-3.97	1.71	-2.94	0.39	-1.66	-1.47	-1.81	-0.81	-1.54	-1.32
BABAM1	-1.45	-0.38	-2.6	-2.13	-2.56	-0.06	2.14	0.39	-0.56	-0.17	-3	0.13	-0.11	-0.09	-0.08	-1.96	0.48	0.87	-0.21	-0.48	-0.97	0.72	0.42	-0.77	-0.92	-3.29	0.08	-1.16	-0.2	-1.69	-2.02
CCDC73	-1.07	-2.43	-1.02	-1.83	-2.56	-1.45	-0.35	-0.99	-1.48	-0.18	-0.77	-0.48	-1.58	0.14	-0.17	-0.46	-0.09	0.39	-0.07	0	-0.41	0.84	-0.1	0.01	-1.26	0.46	0.22	1.08	0.45	0.3	-1.14
ERCC6	-3.56	-1.68	-1.02	-1.58	-2.56	0.32	0.91	-1.31	0.34	-3.41	0.57	0.63	-0.33	-8.26	-8.87	0.67	-3.94	0.33	-4.18	7.47	0.84	-1.01	-12.17	0.24	0.55	0.35	0.65	-0.71	-10.14	0.85	1.11
RNF213	-2.44	-1.55	-1.49	-1.85	-2.56	-0.13	0.53	0.5	-0.23	0.76	-0.68	0.21	-0.38	-1.73	0.35	0.42	-0.89	-0.2	-0.94	-0.23	0.65	0.63	-0.22	-0.89	0.31	0.1	-1.67	1.02	-0.38	-0.74	0.44
SLC34A2	-1.64	-1.72	-1.06	-0.91	-2.56	0.53	-1.22	-0.27	0.53	-0.59	-1.15	-1.05	-0.18	0.13	0.75	0.74	-0.43	-0.8	-1.8	-1.19	-1.19	-0.49	-1.15	-1.62	-0.86	-0.93	-1.27	-0.1	-0.98	-0.03	-0.91
FOXB1	-1.82	-1.94	-1.54	-1.31	-2.55	0.42	0.59	0.75	1.33	1.41	0.48	0.19	0.22	0.11	0.04	-0.49	0.62	0.9	0.68	0.93	1.48	0.24	0.06	0.13	0.55	1.14	1.72	-0.83	-0.17	-0.44	0.3
TMEM39A	-0.79	-1.42	-0.54	-1.56	-2.55	0.53	-1.35	-0.8	-1.94	0.35	-0.01	-0.73	0.51	-0.81	-0.3	-0.43	0.31	-0.69	-0.03	-0.02	-0.83	-0.53	0.34	0.04	0.39	-0.97	-0.57	-0.68	-0.01	0.62	-0.61
ARHGAP6	-0.25	-0.93	-1.82	-1.55	-2.54	0.5	-0.21	0.46	-0.17	-1.02	0.4	-0.02	-0.6	-0.82	0.72	0.41	-0.32	-0.47	0.2	-0.4	-0.47	0.13	-0.54	0.07	0.49	-0.18	-0.6	0.59	-0.24	-0.25	0.48
UBXN2A	-1.94	-2.41	-2.4	-2.08	-2.54	-0.6	0.01	0.21	-0.38	-0.2	-0.92	-2.57	0.34	-0.34	0.04	-0.57	0.11	-0.03	0.24	-0.1	-1.04	0.6	1.15	-1.79	0.19	-0.48	-0.03	-0.13	-0.62	0.2	-0.31
GNB4	-0.9	-1.11	-1.39	-1.08	-2.53	0.96	0.96	1.02	0.67	1.09	-0.16	1.42	-0.45	0.74	-0.67	0.52	1.25	-0.97	0.09	-0.3	0.7	1.36	-0.68	0.17	0.01	0.7	-1.51	-0.96	-0.01	0.85	0.6
RTN4IP1	-2.03	-1.48	-1.4	-2.47	-2.53	-1.05	-0.52	-0.44	-1.29	-0.26	0.31	0.02	0.24	0.26	2.04	-0.48	1.47	0.73	1.16	1.69	1.44	-0.74	2.13	1.06	2.8	3.98	1.26	2.13	0.29	1.05	-0.59
ACSF2	-2.05	-1.45	-2.4	-0.45	-2.52	0.3	-0.89	-0.4	0.71	1.24	1.25	0.13	0.89	0.01	1.4	0.97	-0.26	-0.62	-0.36	0.21	1.07	-0.51	0.91	-0.16	0.07	0.36	-0.68	-1.1	0.97	1.55	1.71
AMPD1	-0.87	-1.91	-1.05	-1.36	-2.52	0.38	-0.89	0.18	0.26	0.77	1.27	-0.47	-0.77	-0.61	0.28	-0.89	-0.01	0.95	-0.54	0.07	0.57	-0.15	0.43	0.75	1.05	0.75	0.43	-0.92	-0.59	0.6	0.55
CCDC92	-1.2	-0.55	-2.38	-0.43	-2.52	2.04	0.37	2.22	1.91	-0.4	0.12	-0.44	0.35	-0.83	0.74	0.99	0.07	0.2	-1.34	-0.89	-1.34	0.72	-0.63	-0.84	0.13	0.44	-1.17	0.44	-0.48	0.21	-0.07
DIP2B	-0.89	-1.13	-1.66	-1.36	-2.52	-1.25	-0.1	1.15	0.8	-0.55	-0.9	-1.88	0.34	0.42	-0.57	-1.18	0.12	-0.68	-1.71	0.28	0.17	0.19	0.35	-2.08	0.81	-0.99	0.01	0.43	0.63	0.03	0.47
FGD6	-2.9	-2.7	-1.4	-2.29	-2.52	1.2	-0.87	0.59	-0.85	-0.39	1.03	0.63	-0.87	1.11	-0.04	0.73	-1	-0.66	0.05	-1.08	-1.07	-0.85	-0.51	0.05	-0.9	-0.2	-0.54	0.13	0.1	-1.48	-1.97
NLRP10	0.66	-0.5	-2.29	-0.36	-2.52	-0.61	-0.88	0.38	0.17	-0.76	0.3	-0.44	-0.59	0.04	0.8	0.14	-0.02	-0.08	-0.05	0.47	1.43	1.15	0.84	0	0.9	0.58	0.51	0.04	-0.49	-1.37	-2.2
HROB	-2.89	-1.57	-2.14	-2.3	-2.51	-0.36	-0.67	-3.57	-0.83	-1.18	0.33	-0.95	-1.52	-4.69	-5.34	-0.08	-0.8	0.4	-0.09	-0.79	-0.27	-0.12	-2.6	0.05	-6.39	-0.96	-0.76	-2.04	-3.31	-3.7	-1.35
ADAD1	0.11	-0.82	0.28	-1.44	-2.5	-0.69	0.84	-0.54	0.91	-0.09	-1.45	-0.78	-0.66	-0.64	0.34	0.15	-1.03	0.12	0.22	0.44	0.83	-0.04	-0.47	-1.12	-0.62	-0.54	-2.94	0.4	-0.28	0.16	-0.1
ANAPC15	-0.17	-2.93	-2.62	0.42	-2.5	-3.08	0.03	-2.88	-1.89	-1.65	-1.52	-1.72	-4.49	-4.69	-5.42	0.97	-1.52	2.56	0.31	-0.09	-0.12	-2.35	-5.7	-8.22	-4.73	-4.43	-9.67	-12.57	-3.03	-4.15	-4.59
C4orf22	-0.25	-0.03	0.18	-0.77	-2.5	1.1	-0.54	0.77	-0.36	-0.22	-0.75	-0.4	1.52	0.06	0.12	0.33	0.03	0.31	0.6	0.74	0.28	1.42	0.26	0.04	0.37	0.35	-1.1	0.01	-0.73	-0.4	0.27
CCL5	-2.16	-2.13	-0.68	-0.92	-2.5	-1.26	-0.65	-1.23	-1.79	-0.11	0.4	0.22	-0.97	0.41	0.02	0.17	0.31	0.49	-0.56	0.59	0.64	-0.49	0.04	0.57	0.51	0.84	0.29	0.76	0.37	-0.13	0.01
CYP19A1	-0.46	-1.2	-2.1	-0.09	-2.5	-0.87	-0.75	-0.41	-0.74	-0.86	-1.4	-1.69	-0.22	0.49	-1.92	-2.66	-0.04	0.48	0.45	-0.37	-0.89	-0.6	0.81	0.33	-0.27	0.1	-0.61	-0.77	1.05	0.06	-0.53
PAK4	-0.44	-0.24	-0.9	0.02	-2.5	-1.12	0.05	-1.41	-0.54	-1.64	-0.38	0.31	0.45	-0.33	0.02	0.39	-0.54	0.63	0.24	0.64	0.87	-0.2	-0.36	1	0.66	0.53	0.26	-1.21	0.15	-0.45	0.84
FBXO8	-0.88	-0.05	-1.81	-1.8	-2.49	-0.37	0.62	1.18	0.18	0.74	-2.1	-0.9	-1.11	-1.08	0.33	-0.77	0.02	0.1	-1.17	-0.57	-1.45	-0.89	-0.28	-0.44	-0.97	-1.43	-1.01	-0.16	0.14	-0.57	1.11
PAX1	0.2	-0.79	0.25	0.87	-2.49	-0.7	-0.48	-0.07	-0.27	-0.02	-0.65	-0.13	0.69	0.1	-0.85	-0.36	-0.74	-2.17	-0.92	-0.46	-0.58	0.58	-0.46	-0.81	-0.19	-1.22	0.17	-1.55	-0.59	-1.06	-1.28
TMEM205	-1.1	-1.94	0	-2.63	-2.49	0.2	0.55	0.69	-0.12	-0.17	0.35	1.35	0.33	-0.14	0.41	1.28	0.25	0.66	-0.34	0.8	0.66	-0.22	-1.36	-1.08	-0.4	-1.61	-1.66	-0.6	-0.82	-1.28	-0.16
ZSCAN23	-1.75	-2.03	-2.74	-1.15	-2.49	-0.5	-0.21	-0.36	-0.73	-0.72	1.77	0.73	1.38	0.36	-1.23	0.01	0.01	-0.74	-0.75	0.37	-0.14	-0.31	-0.65	-0.19	0.54	0.57	-0.19	-1.38	-0.02	0.5	-0.2
MYH13	-1.84	-0.51	-1.58	-0.79	-2.48	-0.39	-0.47	-0.27	-1.3	-0.19	0.75	-0.88	-1.24	0.16	-0.1	0.92	-0.43	-0.4	-0.13	-0.97	-0.65	0.09	0.62	0.25	-0.56	-0.98	-0.57	-0.77	-1.81	0.65	0.61
SPATA12	-0.59	-1.12	-0.87	-0.01	-2.48	0.46	0.53	-0.65	-0.16	0.07	0.81	-0.2	0.48	-0.53	-0.29	0.03	0.64	-0.96	-1.08	-0.44	-0.91	-0.95	-0.05	-0.39	-0.77	-0.44	-0.79	1.42	-1.09	-0.72	-0.3
KCNQ4	-1.79	0.07	-0.61	-1.53	-2.47	-0.06	1.74	1.85	0.6	0.92	0.89	0.36	-1.48	0.94	-0.6	1.83	-1.83	-0.2	-1.33	0.62	0.37	-1.18	-1.17	0.36	0.13	-0.71	-1.48	-1.29	0.35	0.39	1.07
TNFRSF18	-2.27	-0.47	-2.24	-1.97	-2.47	-1	0.96	0.23	0.16	-0.85	-0.39	0.07	0.18	0.13	-0.64	0.56	1.38	-0.07	0.04	0.79	1	0.11	0.2	0.14	0.95	-0.07	-1.89	-0.43	-0.44	0.75	-0.47
CEBPB	0.86	-0.02	-0.56	-0.49	-2.46	0.56	-1.41	-1.02	-0.3	-0.38	0.62	0.94	-0.01	1.07	1.95	-1.52	-1.31	-0.56	-4.28	-1.64	-0.59	-0.98	-1.73	-1.76	0.51	-1.02	-2.05	-0.94	-0.84	-0.52	-0.82
CRYGD	-0.51	-3.29	-0.95	-1.92	-2.46	-0.45	-2	-1.36	-1.49	-1.53	-0.96	-0.88	-0.48	0.33	-0.56	-0.43	-1.95	-1.73	-1.26	-0.33	-0.03	-0.8	-0.01	-0.6	-0.57	-1.03	-1.58	0.09	0.55	0.91	0
GABARAPL1	-2.11	-0.78	-2.14	-1.95	-2.46	-0.18	1.56	0.5	0.69	0.56	-0.92	-1.7	0.94	0.03	-0.97	0.31	0.53	-1.04	-0.48	0	-0.32	-0.33	-0.32	-0.16	-0.3	0.23	0.55	-0.19	-0.13	-1.18	-0.67
RNF8	-1.82	-2.68	-2.3	-0.49	-2.45	-2.19	-0.85	-2.34	-3.45	-2.49	-3.35	-2.03	-1.62	-2	-4.66	-3.43	0.59	2.8	1.45	1.52	0.05	-0.1	-2.16	-2.67	-1.29	-4.42	-0.69	-5.79	-1.31	-2.45	-1.81
SMO	-0.46	-2.1	-0.85	-1.99	-2.45	-0.89	0.74	-0.52	-1.14	-0.59	1.07	0.43	-0.17	0.3	1.13	0.37	-0.04	-0.53	-0.09	0.13	0.03	0.19	0.4	0.45	0.28	-1.13	1.37	-1.56	-0.79	0.6	-0.23
ATP6V1B2	-2.63	-2.22	-2.56	-2.08	-2.44	-2.4	-1.04	-2.93	-2.19	-2.11	-1.44	-0.27	-0.08	0.63	0.11	0.45	-0.32	-2.89	-2	-0.11	-1.15	0.33	1	-1	-0.89	-0.42	-0.8	0.15	1.53	0.91	1.35
MMP10	-1.49	-1.62	-2.34	-1.54	-2.44	-0.21	0.37	1.33	0.33	0.56	-0.14	-1.44	0.71	0.86	0.36	-0.17	0.62	-0.2	-0.44	-0.28	-0.19	0.3	0.3	-0.02	0.11	0.17	-0.16	-0.1	0.37	0.8	0.42
YARS2	-1.12	-1.09	-0.56	-0.28	-2.44	1.31	0.87	0	-1.15	0.93	0.52	2.83	1.09	-0.26	-0.72	1	1.81	0.17	1.57	1.06	1.61	0.53	-1.72	0.51	1.9	0.63	0.24	0.94	-0.73	0.19	0.75
GDA	-0.67	-1.09	-1.38	-1.03	-2.43	-1.5	-1.21	-0.84	-0.99	-0.04	-0.91	-0.14	-1.36	1.25	0.39	1.35	-0.81	-0.72	0.07	0.28	-0.7	0.09	0.69	0.46	0.81	0.25	1.27	-1.15	0.87	1.69	1.47
PNLIP	-1.75	-0.61	-1.75	-2.87	-2.43	-0.33	1.02	0.61	0.51	1	-0.91	-1.11	0.06	-0.78	0.53	0.63	0.07	-0.12	0.57	-0.06	-0.65	0.28	-0.39	0.42	0.05	-0.35	-0.54	1.07	-0.09	-0.69	0.55
TNFAIP2	-1.69	0.34	-0.21	-0.45	-2.43	0.49	1.46	0.86	0.63	0.35	2.05	2.2	0.17	1.09	-0.17	1.43	0.23	0.71	-0.85	-0.53	0.55	-0.31	0.76	-0.38	0.48	0.15	0.4	0.51	-0.55	0.39	0.35
DCAF8L2	-2.5	-1.78	-2.12	-2.46	-2.42	0.89	0.36	-0.03	0.4	0.13	-0.23	-0.9	-0.51	-0.27	-0.24	0.82	-0.24	-2.02	-1.22	-0.53	-0.35	-2.66	0.24	0.14	-0.57	-1.74	-1.56	-0.85	-0.89	-0.66	0.79
FAM218A	-0.13	-1.17	0.1	-0.41	-2.42	0.1	0.57	0.76	0.08	-0.49	-2.04	0.15	0.96	0.32	0.26	-0.01	-0.62	-0.42	-1.09	0.03	0.4	0.2	-0.42	0.21	0.77	0.33	-1.05	0.02	0.61	-0.75	0.14
PRDX1	-0.92	-1.16	-1.31	-1.32	-2.42	0.33	-3.42	-0.07	0.41	1.7	-0.7	-1.94	-1.57	-0.3	-0.93	0.43	0.02	0.92	0.55	0.99	0.58	2.04	-0.61	-6.75	0.06	1.52	1.23	0.05	0.83	0.8	1.28
SNAP25	-0.16	0.84	-0.73	-1.83	-2.42	-0.34	-0.74	0.35	-0.27	-0.13	-1.01	2.15	1.24	-0.38	0.19	0.82	-0.72	-0.27	-1.58	-1.27	-0.86	0.91	0.53	0	-0.09	0.09	-0.07	-0.73	1.22	1.38	0.34
UBE2Q2	-1.12	-1.09	-1.45	-0.85	-2.42	-0.62	0.45	-0.44	0.52	-0.42	-0.3	-0.79	0.37	-0.49	-0.76	-0.61	-1.29	-0.36	-0.71	-0.16	-0.08	0.44	-0.48	-0.23	-0.12	-0.28	-1.05	1.26	-1.9	-0.66	-1.52
BTAF1	-3.09	-2.59	1.14	0.64	-2.41	-1.72	-1.7	-5.73	0.07	-5.63	-0.44	-0.03	3.3	-10.61	-12.14	-1.71	-2.01	-0.96	0.5	-0.41	-2.15	-3.26	-13.41	-4.5	-7.04	-13.88	-13.62	-5.84	-2.73	-6.27	-5.23
OTUD6A	-0.41	0.55	-0.11	-1.65	-2.41	2.82	1.53	2.19	2.05	2.39	1.5	1.37	0.65	0.41	0.54	-1.28	-1.51	0.48	-0.6	-0.78	-0.55	-0.9	-0.14	-0.02	-0.21	-0.6	0.3	-0.77	0.23	-0.25	-0.04
RAD51D	-2.56	-2.22	-2.74	1.53	-2.41	-2.76	0.47	-1.78	-2.2	-2.46	-3.39	-6.51	-0.36	-9.42	-7.88	-1.29	-2.62	1.01	3.09	1.61	1.62	1.01	-6.94	-1.16	-6	-4.3	0.58	-5.73	-1.94	-0.34	0.11
TAS2R42	-0.06	-0.41	-0.34	-0.94	-2.41	-1.59	-0.61	-0.37	-0.85	-0.17	1.45	-0.27	1.51	1.23	-1.44	-1.32	-1.09	-0.48	0.03	-0.35	-0.33	-0.94	-0.04	0.84	-0.24	0.2	0.18	-0.81	-0.47	-1.2	2.34
XRCC2	-4.94	-3.47	-4.38	0.44	-2.41	-3.6	0.01	-2.24	-3.02	-1.31	-1.16	-2.37	-0.62	-4.1	-4.68	-0.52	-0.51	0.08	2.16	0.51	-0.6	-0.43	-3.57	-0.63	-3.48	-3.16	-0.36	-4.74	-1.23	-0.62	-0.24
NELFCD	-1.91	-2.54	-1.66	-1.75	-2.4	0.1	-0.14	-1.06	-0.23	-0.44	1.63	2.76	-0.02	0.15	0.28	-0.87	-1.82	0.26	2.06	2.36	1.87	0.44	0.18	0.6	0.43	0.12	-1.09	-1.74	0.32	-0.02	1.93
NUP153	-1.29	0.61	0.18	-0.3	-2.4	2.38	2.05	1.56	2.49	1.76	0.25	-1.14	-1.22	-0.45	-0.47	-0.69	-0.18	-0.48	-0.48	0.38	0.51	-0.73	0.08	1.75	0.02	0.84	-0.24	-0.67	0.46	1.65	0.49
ZNF816	-1.49	-0.9	-1.84	-0.36	-2.4	-1	-0.61	-1.46	-1.08	-0.53	-0.78	-1.5	-0.16	0.48	0.16	-0.02	-0.95	-0.6	-0.19	-0.46	-0.64	-1.33	-0.76	0.66	0.94	0.14	0.74	2.2	-1.41	-1.32	-1.13
CTNND2	-1.75	-0.66	-1.19	-2.16	-2.39	-0.49	0.15	0.7	0.71	-0.53	-1.39	-0.29	-0.57	-0.22	-0.31	0.26	0.37	1.25	0.91	0.46	0.73	0.45	0.55	1.57	-0.03	0.69	1.14	0.76	0.65	0.39	-0.83
DRD4	-1.19	-0.98	-1.45	-0.95	-2.39	0.41	0.96	0.69	1.32	1.9	-0.98	0.45	0.77	0	-1.19	0.71	0.73	0.59	0.34	-0.66	-1.51	1.04	1.55	-0.38	1.35	-0.3	1.33	-0.32	0.1	-1.3	-0.75
ELF5	-2.09	-1.08	-0.58	-0.77	-2.39	0.65	1.05	0.62	1.08	0.55	-0.84	0.09	0.4	-0.06	-1.07	1.11	0.31	0.41	0.26	0.46	1.05	1.18	-0.79	-0.43	0.34	-0.53	-0.43	0.04	0.38	1.4	-0.63
KHDRBS3	0.67	0.93	1.06	0.14	-2.39	-0.81	-0.74	-0.94	0.09	-0.27	-0.15	0.74	-1.2	0.27	-0.27	-0.94	-0.05	0.07	-0.64	-1.97	-1.18	-0.58	-0.02	0.82	-0.66	0.7	0.7	0.9	-1.66	-0.63	-1.12
MGP	-0.96	-0.28	-0.3	-0.58	-2.39	-0.44	-1.53	-1.26	-2.11	-0.8	-0.43	-0.61	0.9	-0.03	-0.51	-1.41	0.51	0.25	-0.32	-0.19	-0.34	-0.27	0.76	0.48	0.11	-0.4	0.55	0.9	-0.32	-0.98	-0.18
PPP1R16B	-0.66	-1.51	-1.7	-1.29	-2.39	0.12	0.93	-0.04	0.09	0.6	-0.77	0.28	0.16	-0.03	0.32	0.94	1.89	0.44	-0.34	0.83	0.22	0.74	1.06	0.95	1.31	1.57	0.57	-0.27	1.17	0.56	1.04
TMEM59	-1.47	-1.08	-1.35	-0.69	-2.39	0.47	-1.71	1.22	1.02	0.68	-0.76	-0.72	0.73	0.03	0.44	-0.29	0.67	0.36	-1.31	-0.23	0.19	-0.87	-0.61	0.06	0.6	-0.43	-1.54	0.17	-0.75	0.43	-1.04
C7orf33	0.12	0.29	-1.38	-0.02	-2.38	0.25	0.89	1.02	0.56	0.38	0.47	0.62	0.92	0.24	0.24	0.08	-0.47	-1.64	-0.53	-0.24	-0.1	0.06	0.89	-0.19	0.61	0.08	1.58	1.41	-0.29	0.13	0.56
C9orf9	-1.71	-2.09	-0.72	-3.17	-2.38	0.33	0.81	1.14	0.81	0.75	-0.45	-0.36	-0.24	0.1	1.19	-0.24	-0.42	0.1	-0.13	0.13	0.95	1.44	-0.74	-0.65	0.36	-0.23	-0.15	-0.05	0.31	-0.09	-1.32
CST2	-1.18	-1.48	-1.65	-1.88	-2.38	-0.09	-0.03	0.47	0.44	-0.91	0.57	-0.63	-0.91	0.23	-0.53	-0.48	-2.47	-2.72	-1.4	-3.06	-2.97	1.24	-0.18	-0.77	-0.58	-0.16	0.14	0.73	0.1	-1.15	-0.65
EIF3F	-2.37	-0.13	-2.52	-1.56	-2.38	0.3	-0.46	1.42	1.58	1.34	-0.76	0.6	-0.65	-1.39	-0.02	NA	0.03	-0.49	0.68	0.67	1.76	1.03	1.83	0.99	1.61	1.77	1.31	0.01	-0.68	-1.26	0.11
RAI14	-1.95	-0.26	-0.45	-1.18	-2.38	-0.3	1.24	0.5	0.36	0.19	-0.63	-0.44	-0.11	-0.27	-0.34	-0.98	0.23	0.21	0.48	0.16	0.39	-0.73	0.46	-1.24	0.45	0.26	0.14	-2.76	0.03	0.89	1.17
SLC45A4	0.09	-0.22	1.28	-0.57	-2.38	0.45	1.11	0.43	-0.06	0.77	-0.53	1.11	-0.24	0.84	0.12	0.76	-0.89	-1.38	-0.47	-0.82	-0.59	-0.01	0.74	0.6	1.55	0.44	0.42	0.38	0.03	0.32	-0.86
STAB2	-0.76	-0.6	-0.4	-1.25	-2.38	0.36	0.69	1.43	1.45	1.18	-1.51	-0.23	0.63	1.78	0.66	-0.24	-1.61	-2.82	-2.54	-0.4	-1.21	-0.56	0.21	-0.11	0.59	0.16	0	1.18	1.22	1.75	-0.33
B4GALT4	-1.15	-1.44	-1.67	-2.05	-2.37	0.31	-1.6	-0.23	0.12	0.41	0.2	-0.18	-0.25	-0.63	0.06	-0.15	0.64	0.09	-0.77	-0.09	0.6	-0.06	-0.88	-0.22	0.23	0.3	0.32	-0.05	-0.36	-0.53	-1.2
CD72	-0.69	-1.53	-0.72	-0.65	-2.37	-0.46	-0.85	-0.73	-0.46	-0.74	-0.27	0.12	-0.77	0.42	0.36	-0.02	-1.19	-1.32	-0.5	0.12	-0.89	-0.79	0.82	-0.22	0.6	0.41	1.21	0.48	-0.18	-0.01	-0.26
TDP2	-0.87	-2.65	-10.16	-0.74	-2.37	-6.66	1.18	-0.08	-7.08	-1.43	0.18	0.65	-1.4	-1.24	-2.2	-7.83	-0.58	-0.8	-0.26	0.34	-0.07	-3.11	-3.02	-1.92	0.24	-0.19	-1.25	-1.03	0.12	-1.09	-0.85
HARBI1	-0.07	1.33	-0.78	-0.01	-2.36	-1.66	-0.73	-0.92	0.57	-0.86	-0.79	-2.53	-2.11	1.2	-0.44	0.58	1.04	1.49	1.05	0.75	0.65	1.23	0.89	0.29	0.15	0.16	0.19	0.08	0.31	-0.89	-0.57
MAATS1	-1.88	-0.17	-1.82	-2.94	-2.36	-0.27	-0.64	-1.16	0.93	-0.1	-0.18	-1.09	0.1	0.04	0.29	-0.12	1.46	0.32	-0.33	-0.3	0.13	-1.23	0.83	0.64	0.56	-0.04	0.27	-0.67	-0.43	0.86	1.49
MYO7B	-1.5	-3.24	-2.82	-1.27	-2.36	0.47	-0.13	0.22	0.14	-0.01	-0.15	0.24	-0.67	0.45	-1.03	-1.08	-0.98	-0.24	0.94	0.03	-0.66	-0.8	0.38	0.34	-0.81	-0.71	-0.9	-0.6	-1.12	0.08	-0.47
NOSIP	0.99	0.66	-0.05	2.4	-2.36	-0.31	1.2	-0.76	2.03	0.26	-1.16	-1.7	-1.42	-0.28	0.35	1.17	-0.39	-0.64	-0.84	-0.46	0.23	0.34	0.87	-1.44	-2.65	-1.51	-2.53	-1.56	1.23	-2.21	0.13
ZNF606	-1.36	-1.46	-0.81	-2.81	-2.36	-1.76	-1.8	-0.89	-1.71	-0.31	-0.54	0.07	-0.36	0.39	0.34	-0.19	-0.6	-0.41	-0.03	-0.65	-0.8	-1.43	-0.4	1.03	0.35	1.09	0.08	0.61	-0.14	-0.04	-0.04
CEL	-1.14	-0.03	0.37	-0.27	-2.35	0.85	0.99	0.4	0.58	0.73	-1.99	-1.25	1.56	-0.13	-0.02	-0.35	-0.48	-0.55	-0.61	-0.83	-0.26	0.97	-0.76	-0.58	-0.33	-0.5	-1.21	-0.9	0.63	0.57	-0.34
SCRN3	-0.59	-0.85	-1.05	-1.6	-2.35	-1.47	-0.59	-0.3	-1.07	-0.64	0.16	-1.35	-0.68	-0.14	-1.47	-0.4	0.63	0.72	-0.11	0.35	0.69	-1.43	0.64	-0.22	0.51	-0.39	0.05	-1.83	0.34	0.42	0.37
SLC3A1	-2.43	-0.86	-1	-0.86	-2.35	-0.99	1.14	0.68	0.43	0.08	-0.55	0.06	0.27	-0.69	-0.11	1.57	1.85	-0.16	-0.3	-0.6	-0.38	-1.39	1.4	0.9	0.39	0.18	1.5	0.11	0.27	1.31	0.73
SULT1A2	-0.68	0.51	-0.99	0.07	-2.35	0.37	2	0.43	1.36	1.92	-2.03	-0.48	1.27	0.19	0.81	0.55	0.67	-0.1	-0.35	0.62	0.28	2.02	0.4	0.78	-0.17	-0.32	-0.25	0.07	-1.04	0.28	-0.03
TM2D3	-1.63	-1.72	-1.15	-1.71	-2.35	-1.04	0.16	-0.12	-0.8	-0.21	-0.25	0.2	-1.18	-0.79	-1.71	-0.23	0.04	-2.27	-1.87	-1.56	-1.84	-1.77	-0.6	1.43	-1.32	0.32	-0.82	-0.6	0.3	0.42	0.11
C14orf142	-0.55	-0.83	-0.23	-1.07	-2.34	0.2	0.57	0.56	-0.36	0.46	0.74	1.66	0.09	1.92	0	0.46	0.3	-0.31	-1.26	-0.3	-0.56	0.98	0.63	0.84	0.95	-0.52	0.29	0.38	1.48	0.69	0.01
SUDS3	-0.97	-1.37	-1.94	-1.31	-2.34	-1.11	0.92	-0.32	0.04	1.46	0.65	0.22	-2.68	-0.51	-0.14	-0.44	0.08	2.72	-0.59	-0.4	0.12	-1.31	-1.99	-1.42	-1.18	0.06	-1.68	-2.51	-1.42	-0.92	-0.73
TM6SF1	-0.53	-0.7	-1.16	-1.87	-2.34	-0.13	0.17	1.06	1.08	1.29	1.07	0.1	-1.05	0.62	0.28	0.33	-1.73	-2.75	-0.57	-0.43	-0.44	-1.04	-0.02	0.25	-0.69	0.51	0.81	-1.08	-0.88	-0.47	-0.55
AP001816.1	-2.04	-0.01	-0.11	-2.53	-2.33	-0.15	0.81	-0.65	-0.67	0.01	-1	-0.16	0.09	0.62	0.15	0.07	1.79	0.72	0.19	-0.66	-0.58	0.29	0.4	0.27	0.05	1	0.23	-0.54	1.11	0.61	-0.36
CBY1	-2.88	-2.31	-3.75	-2.86	-2.33	-0.83	-0.86	-1.23	-0.2	-0.92	0.42	0.83	0.18	0.26	0.24	0.6	0.04	0.64	-0.46	-0.07	0.47	0.12	-1	-1.11	-0.61	0.12	-0.8	-2.01	0.69	0.19	0.56
PRPF8	-2.78	-0.86	-0.74	-2.23	-2.33	-0.6	NA	NA	-0.3	NA	0.18	0.5	-1.03	-1.3	0.27	NA	0.63	-0.31	-0.81	-0.21	-0.27	0.75	1	-1.55	0.36	0.24	0.9	0.64	-0.98	-0.17	-0.79
ZCWPW2	0.35	-1.92	-0.31	-0.65	-2.33	-0.75	-1.85	-1.07	-0.99	0.44	-0.29	-1.13	-1.86	-0.25	-0.31	1.23	0.59	0.86	0.3	-1.96	-1.21	-0.48	0.33	0.49	-0.18	0.01	-0.18	1.05	-1.44	-0.8	1.07
HIST1H1B	-1.41	-1.25	-3.73	-1.38	-2.32	-2.93	-1	-1.47	-1.65	0.18	-0.18	0.42	-0.13	0.14	0.56	-1.62	-1.05	-0.73	-0.64	0.52	-0.17	-0.46	-1.47	0.12	0.17	-0.58	0.35	1.09	-1.72	-1.29	-0.59
IL1RAP	0.15	-0.24	-0.99	-1.22	-2.32	-0.22	-0.59	0.62	0.64	-0.44	1.09	0.72	-0.06	0.4	-0.65	-0.74	0.45	0.06	-0.36	0.2	0.92	0.04	1.02	0.78	1.4	0.38	1.05	-0.81	-0.39	0.8	-0.15
OR4S1	-0.59	0.12	-0.69	-0.62	-2.32	-0.53	-0.18	0.14	0.47	-1.04	-1.38	-0.36	-0.8	1.2	1.1	1.99	-1.03	-0.29	-0.65	2.11	0.85	-0.39	0.04	0.26	0.74	-0.01	-0.07	0.02	-0.92	-1.43	-1.06
SOX15	-1.53	0.7	-0.48	-1.06	-2.32	1.13	1.42	0.62	0.51	1.01	0.12	0.81	-1.31	-0.9	0.02	-0.05	-0.38	-0.44	-0.11	0.33	0.34	-0.63	0.11	-0.36	-0.9	0.19	0.13	-0.78	-0.04	-0.71	-0.59
CPXCR1	-1.18	-2.08	-1.56	-1.68	-2.31	0.16	0.05	-0.34	-0.23	-0.04	-0.42	-0.95	1.18	-0.16	1.02	0.02	0	0.37	0.32	-0.05	-0.69	1.81	0.85	-0.03	-0.04	0	0.6	0.53	-1.47	0.18	1.44
NDUFA7	-0.92	-0.76	-0.89	-1.82	-2.31	-0.81	-1.58	-0.62	0.1	-0.64	-1.5	-1.97	1.6	-0.58	0.12	0.87	-0.28	0.75	-0.41	0.22	0.71	-1.34	0.79	0.31	0.81	0.07	0.06	-0.66	0.11	-0.26	-0.28
NUMA1	-0.75	-0.24	-0.51	-0.95	-2.31	1.44	1.11	0.57	1.4	0.88	-0.11	-0.27	-2.07	0.22	-1.94	0.54	-0.2	0.21	0.84	0.36	0.33	0.61	-0.65	0.85	-0.07	0.76	-0.4	1.65	-0.02	-0.58	1.25
ZNF460	0.28	-0.56	-0.91	-0.4	-2.31	-0.33	-0.05	-0.21	0.17	-1	-0.48	-1.55	0.21	-1.22	-0.77	-0.8	-0.34	-0.21	-0.76	-1.54	-1.71	-1.07	0.34	-0.25	-1.75	-0.78	-0.29	0.69	-1.61	1.43	2.36
AKIRIN1	0.42	-0.6	-0.44	-0.17	-2.3	1.73	1.27	1.3	-0.02	-0.74	-0.72	-1.95	-0.32	0.05	0.5	0.47	-1.1	-1.12	-0.24	-0.58	-0.6	-1.27	0.43	-1.14	0.75	0.81	0.93	-0.1	-0.17	0.68	-0.41
CRELD2	0.5	-0.35	-1.3	-0.68	-2.3	-0.24	-2.03	-1.5	-1.2	-1.37	0.74	-0.08	0.29	-1	-0.79	-0.42	1.6	1.2	0.65	1.39	0.99	-1.1	-0.1	-1.41	-0.81	-0.03	-0.83	-0.42	1.68	1.52	0.64
FAM217A	-1.67	-0.84	-1.55	-1.98	-2.3	0.69	-1.05	-0.1	-0.32	0.35	-0.24	-1.05	-0.77	0.25	0.14	-3.02	0.71	-0.64	0.7	-0.14	-0.11	0.29	0.38	1.01	1.59	0.94	0.32	-0.08	-0.57	-0.01	-1.01
HHLA2	0.89	1.51	-0.19	-0.04	-2.3	-0.13	-1.17	0.1	-0.87	1.19	-0.24	-1.44	-0.72	0.5	0.82	0.44	1.12	-0.21	-0.65	-1.34	-0.62	1.44	0.95	0.04	0.05	0.68	0.45	-0.68	-1.29	-1.14	0.27
PLEKHJ1	-0.92	-0.95	-1.85	-1.56	-2.3	-0.63	0.45	-0.56	-1.24	-0.77	0.07	-0.6	-1.75	1.03	-0.52	1.93	-0.41	-0.9	-0.29	-0.49	-0.64	1.01	-0.58	-0.32	0.79	0.39	0.42	-0.01	0.72	-1.36	-1.77
PPP1CA	-1.18	0.34	-1.03	-0.63	-2.3	-2.69	-0.29	-1.75	-3.95	0.36	-0.26	0.21	0.75	-1.61	-0.87	1.21	0.65	0.76	1.14	1.3	0.14	0.36	-0.34	-3.02	-0.21	0.87	-0.74	-0.92	-1.69	0.94	-1.04
C10orf62	-1.01	-0.2	-0.94	-0.02	-2.29	-0.33	0.01	1.43	0.36	-1.07	0.9	1.14	1.18	1.47	0.44	0.61	0.7	-1.31	-0.63	-0.9	-0.73	0.77	-1.04	0.37	-0.25	-0.25	0.93	-0.03	0.19	-0.1	0.11
GTF2F1	-0.29	0.13	0.12	-0.45	-2.29	-1.48	0.55	-0.02	-0.19	-0.52	-1.35	-0.04	0.53	0.55	-0.29	0.32	0.99	0.68	-0.43	-0.69	-0.84	-0.05	-1.96	-1.99	-3.41	-2.11	-1.11	-0.44	-0.23	-0.49	-0.87
OR4C46	-2.17	-0.66	-2.16	-2.96	-2.29	-0.26	-1.13	-0.39	-0.64	0.07	0.02	0.24	-0.5	0.5	0.1	0.06	0.63	0.37	0.29	0.25	0.46	0.38	0.08	0.35	0.74	1.81	0.51	-1.69	1.17	0.34	0.43
RCC2	-0.59	0.04	-0.32	-1.2	-2.29	-0.13	0.2	-0.07	0.23	-0.24	1.76	1.5	-1.61	0.33	0.11	1.39	1.59	0.9	0.55	-1.09	-1.01	0.81	0.02	-0.01	0.26	-0.25	-0.75	0.21	1.01	1.77	-0.76
AIDA	-1.79	-0.32	-0.51	-0.94	-2.28	0.34	-0.74	-0.46	-0.73	-2.72	2.01	0.21	0.76	1.28	1.02	-0.37	0.42	-0.36	0.5	-0.27	-0.39	-0.23	-0.44	-0.02	0.54	-0.75	-0.71	-1.58	0.23	-1.41	0.33
BARX2	-1.52	-1.33	-1.83	-1.31	-2.28	-0.6	-1.51	-1.66	-0.31	0.19	-1.75	-2.4	1.07	0.29	-0.27	0.85	-0.89	-0.07	-0.87	-1.17	-0.47	0.31	-0.03	-0.45	-0.76	-0.51	-1.27	-0.15	-0.69	-0.23	-1.82
COX16	-1.67	-1.95	-1.42	-1.51	-2.28	-1.86	-1.53	-0.01	-0.47	-0.65	-0.53	0.12	-0.12	-0.75	-0.43	0.17	0.07	-0.41	-0.21	-1.48	-1.77	0.71	0.35	0.03	0.3	0.59	0.37	0.62	-0.57	0.33	0.14
FLT3LG	0.16	0.04	0.33	-0.18	-2.28	0.31	0.38	0	0.14	-0.26	0.63	0.05	1.68	1.38	0.28	2.13	0.12	-0.05	-0.59	-0.27	0.62	-0.59	0.35	1.01	0.09	0.51	-0.21	-0.9	0.24	-0.24	-0.8
NCCRP1	0.67	0.42	-1.44	-0.76	-2.28	0.54	-1.11	-0.48	0.09	0.51	-0.99	1.17	0.25	-0.58	-0.37	0.02	0.74	0.59	0.16	0.44	0.72	1.01	-1.59	0.09	-1.3	0.17	-1.1	0.46	1.31	0.63	-0.85
CUL5	-1.7	-3.51	-0.61	-1.01	-2.27	-2.46	-1.03	0.12	-0.42	-1.62	1.45	1.16	0.41	-0.8	-1.89	-2.87	-0.61	-2.07	-2.97	-1.98	-0.59	-3.43	0.21	-2.45	-0.62	-2.25	-3.11	-2.15	-0.39	-2.4	-1.11
DIRC3	-1.14	-0.13	-1.65	-1.36	-2.27	-0.67	-1.07	0.29	-1.65	-1.18	-0.32	-0.44	-1.22	1.17	0.84	-0.36	0.9	-1.24	-0.41	0.1	0.32	-0.51	0.86	-0.22	0.98	-0.41	0.61	-0.54	-0.91	0.34	0.73
MDH1	-1.14	-1.77	-2.7	-2	-2.27	-0.7	-0.91	0.65	-0.23	-0.7	0.87	1.24	2.06	0.24	-0.35	-0.97	-2.21	-0.6	-0.19	-0.7	-1.54	-0.6	-0.25	-0.23	1.89	-0.65	0.64	2.29	0.21	1.34	-0.28
SLK	-0.85	-0.11	-0.85	-1.59	-2.27	-0.53	0.96	1.25	-0.78	0.58	0.91	1.49	0.22	-2.05	-1.3	0.01	1.03	0.94	2.21	0.59	0.37	1	-0.21	0.52	0.26	1.62	-0.58	1.73	0.98	2.35	0.88
SNX1	-1.25	-2.38	-0.97	-0.69	-2.27	0.56	0.99	0.89	1.32	-0.62	-0.14	-1.05	0.14	0.12	-0.28	-2.1	-1.4	0.15	-0.26	-0.92	-0.34	0.11	-0.76	0.05	-0.73	0.56	-0.41	-0.79	-0.62	0.46	-0.85
ZNF175	-0.37	-1.62	-1.61	-0.76	-2.27	0.05	-0.51	0.15	-0.01	0.27	-0.02	0.84	0.13	0.01	0.72	-1.01	1.51	1.35	0.4	1.23	0.43	0.05	0.51	1.73	0.57	1.44	0.48	-0.29	1.54	0.89	2.2
ERCC6L2	0.5	0.02	-4.04	-0.33	-2.26	-3.45	-0.7	-0.28	-3.35	0.49	-4.37	-1.06	-2.48	1.03	-0.2	-1.85	0.29	0.79	-0.69	0.11	-1.43	0.47	0.36	0.49	0.01	-3.68	0.74	-0.96	-1.58	-1.38	-1.2
FAM168B	1.46	0.11	0.53	0.85	-2.26	0.49	-0.42	-0.79	0.5	-0.63	-1.27	-0.27	-1.39	0.38	-0.29	-0.95	0.23	0.5	-1.16	-0.33	0.04	0.31	0.33	-0.51	0.52	1.48	0.32	-0.6	2.52	0.74	1.75
NPBWR2	-2.61	0.26	-0.9	-2.69	-2.26	0.44	1.19	0.15	-0.19	0.4	0.42	0.45	-0.67	0.17	0.66	0.61	2.44	1.16	-0.79	0.32	0.15	-0.87	0.35	0.16	0.63	-0.39	-0.2	-0.94	0.63	0.63	0.76
PARP6	-0.39	-1.2	-0.2	-0.41	-2.25	-1.92	-1.31	-2.32	-2.46	-2.45	-1.93	-1.35	-0.57	-1.31	0.63	-1.16	-0.14	0.63	0.57	-0.15	0.29	-1.25	-2.1	-0.7	-1.88	-0.51	-2.32	0.43	1.49	0.92	0.32
RPS21	-1.22	-1.71	-1.92	-1.3	-2.25	1.37	0.71	0.73	1.66	1.53	-1.53	-1	1.7	1.25	0.14	-0.6	0.01	-0.25	2.25	1.85	1.38	-0.8	0.33	0.33	-0.35	0.53	1.16	0.58	0.66	0.64	1
CTBP1	-1.79	-0.25	-1.96	-1.08	-2.24	1.37	-0.74	0.53	-0.12	-0.47	-0.35	0.28	0.98	0.03	-0.14	-0.87	0.58	0.22	0.2	-0.28	0.26	0.09	0.24	-1.32	0.01	-0.43	-0.6	1.46	-0.43	-0.73	-0.2
MR1	0.25	-0.78	0.08	-1.11	-2.24	-0.34	-1.83	-1.13	-1.64	-0.14	0.13	-0.83	-0.79	0.08	-0.14	-0.52	-1.04	0.08	-0.8	0.42	0.03	-0.46	0.27	-0.48	0.61	0.21	0.18	0.79	1.66	1.35	1.76
MRAP	-1.6	-0.44	-1.34	-2.25	-2.24	0.61	-0.67	0.01	-0.12	0.15	-0.14	0.05	0.45	0.23	0.35	-1.73	-1.1	-0.67	-0.6	-0.88	-0.49	-0.55	0.65	0.29	-0.59	-0.2	0.32	0.56	-0.51	-0.17	-0.27
RAB12	-0.99	-0.59	-0.01	-0.86	-2.24	-1.49	-0.91	-0.94	-0.94	-0.71	0.55	1.41	-1.38	-0.56	1.13	0.51	0.7	-0.24	-0.44	1.19	0.8	-0.5	-0.51	-1.37	0.86	0.39	0.06	-0.25	1.05	0.2	-0.69
ZNF276	-1.69	0.38	-1.79	-1	-2.24	-1.37	-0.93	-1.35	-0.73	-1.49	0.4	1.85	0.06	0.2	-0.97	0.34	0.38	-0.29	-0.61	-1.03	-1.21	-0.36	0.65	-0.63	-0.1	0.26	-0.77	0.25	0.99	0.85	1.14
CDC42EP2	0.23	-0.41	-0.96	1.2	-2.23	0.55	0.22	-0.97	0.5	-0.12	0.37	0.68	-0.13	0.63	0.76	-2.05	0.05	0.6	-0.19	-0.78	-0.8	-0.88	0.37	-0.51	-0.34	0.06	-0.79	0.93	0.56	-0.62	-1.38
FAM194B	-2.07	-0.46	-1.59	-2.11	-2.23	-1.22	-1.3	-0.94	-1.41	-0.91	0	-1.03	-0.62	-0.68	-0.3	0.04	-1.55	-0.36	-0.95	0.18	-0.12	-0.67	-0.01	-0.66	-0.5	-0.67	-1.55	0.12	0.57	1.11	1.74
LIN37	-1.98	-2.83	-2.97	-2.22	-2.23	-1.87	-0.21	-1.31	-1.61	-0.05	0.27	0.8	2.86	-0.74	-2.15	0.6	-1.53	-1.59	-1.02	-0.32	-0.07	-0.63	-0.54	-0.67	-0.52	-1.06	-0.38	-4.96	0.16	0.12	0.53
OR4K2	-0.17	-0.45	-0.55	-1.02	-2.23	0.39	0.17	-0.15	-0.08	1.11	0.18	-0.1	-0.09	-1.06	0.29	1.42	-0.96	-0.78	-1.19	-0.25	-0.76	0.37	0.56	0.2	-0.21	0.37	-0.24	0.5	-0.69	-1.21	0.99
OR9Q2	-0.75	-0.39	-0.2	-1.19	-2.23	1.24	1.75	0.69	0.34	0.3	0.02	0.57	0.75	0.19	-0.04	1.02	-0.42	-0.62	-0.37	-1.02	-1.17	-0.09	0.95	0.55	-0.29	0.88	0.57	-0.51	0.12	0.57	0.56
SRA1	-2.22	-2.23	-1.18	-2.26	-2.23	0.29	1.99	1.19	1.33	1.9	0.62	0.19	0.31	0.19	0.19	1.07	-0.27	-1.42	-0.91	0.89	1.58	-0.8	0.54	-0.26	0.85	0.37	-0.31	0.75	1.47	2.08	0.69
SULF2	-1.95	-2.16	-1.75	-1.84	-2.23	-0.18	-0.36	1.03	0.34	0.78	2.28	0.38	-1	-1.12	0.43	0.98	-1.39	-0.62	-0.16	-0.4	-1.37	-0.74	0.3	0.12	0.64	-0.53	-0.67	0.37	0	-0.22	0.99
TERT	-1.21	-0.2	-1.18	-0.8	-2.23	0.09	1.1	-0.62	-0.13	0.31	1.01	0.98	1.98	-0.21	0.44	0.76	-1.03	-0.03	0.16	0.56	0.43	0.32	0.45	-0.77	1.23	1.05	0	-1.09	1.15	-0.29	-0.33
ADD3	-0.51	-1.34	-0.83	-0.12	-2.22	-1.04	-0.17	-0.48	0.11	-0.84	-0.22	-1.38	1.92	0.37	-0.03	-0.87	0.87	1.16	0.11	-0.89	-1.09	-1.13	0.25	-0.6	-0.67	-1.36	-0.48	1.5	-1.57	-0.58	-0.89
ADRA2B	0.72	-1.74	-1.45	-0.59	-2.22	0.69	0.9	0.68	0.17	-0.65	0	0.29	-0.34	0.69	-0.16	-0.46	-1.67	-0.77	-0.91	0.08	0.89	-0.11	-0.02	0.4	1.08	1.52	-0.18	-0.79	-0.09	-0.15	0.17
RNF44	0.02	-0.78	-0.45	-0.27	-2.22	-0.91	0.88	-0.17	-0.73	0.43	0.87	1.12	0.97	-0.98	0.92	1.88	0.21	0.44	0.67	0.73	0.07	0.63	0.95	0.02	-0.24	0.67	0.52	-0.49	0.45	0.89	-0.26
TAC4	-0.76	-0.3	0.54	-1.14	-2.22	-0.01	0.12	0.03	-1.04	-1.16	0.25	0.41	-0.92	-0.18	-0.95	0.65	-0.43	0.28	0.41	0.37	0.65	-0.49	0.03	0.28	-0.28	0.07	0.93	0.84	0.52	-0.15	0.09
ABL2	-1.69	-0.63	-1.62	-2.08	-2.21	-0.42	-0.27	1.65	0.12	0.95	-0.52	-0.14	-0.27	0.54	-0.45	-1.95	-0.37	0.13	0.01	-0.96	-0.58	-0.65	1.08	-0.81	-0.07	-0.48	-0.66	0.12	-0.15	-0.05	-0.56
ALK	-0.74	-0.81	-0.36	-2.05	-2.21	-0.21	1.1	0.25	-0.26	0.27	-1.73	-1.03	-0.08	0.84	0.41	0.06	-0.87	-0.16	1.96	2.39	1.85	1.28	-1.26	-0.04	0.14	-0.68	-0.34	-1.17	0.34	0.47	1.41
AMN1	-1.61	-0.58	-0.52	-0.64	-2.21	0.25	0.79	0.02	0.11	0.64	-0.09	0.98	0.39	-0.37	0.67	0.1	-0.1	0.03	-0.27	0.03	-0.08	-0.83	-0.09	-0.45	0.75	0.61	0.55	0.39	1.22	0.35	-1.18
CEP55	0.59	-2.64	-1.03	0.32	-2.21	0.89	-0.38	1.3	-0.4	0.82	-1.19	-1.37	1.65	-0.08	0.34	0.73	0.63	-0.12	0.9	0.72	0.12	1.15	-0.28	-0.55	-0.03	-1.19	-1.25	1.25	1.42	0.69	-0.49
NEDD4	-0.06	-1.49	-2.06	-0.29	-2.21	-0.04	-0.62	-1.12	-0.96	-0.96	-0.84	-2.47	-0.04	-0.34	0.46	-1.25	0.11	1.17	0.65	-0.44	0.49	-0.13	-1.22	-0.25	-0.92	-1.11	-1.87	0.44	-0.05	1.08	-0.61
TEN1	-2.3	0.82	-0.8	-2.01	-2.21	0.74	0.54	1.11	0.45	0.59	-1.43	-1.76	3.55	-0.44	0.58	0.46	2.26	2.05	3.71	4.01	3.39	-1.27	-0.66	0.85	0.11	-1.02	-3.83	0.38	0.43	-1.64	-0.67
TMPRSS4	-0.58	-2.07	-1.56	-1.81	-2.21	0.57	0.52	1.11	1.13	-0.76	-1.03	-1.02	0.42	0.43	0.47	-0.43	0.52	0.96	-0.7	-0.38	-0.49	0.46	0.16	-0.3	-0.91	-0.57	-0.55	0.78	-0.53	-1.19	-0.25
ZBTB20	-1.31	0.73	-1.58	-0.79	-2.21	0.18	1.13	0.11	-0.15	0.51	-1.87	0.8	1.1	0.26	-0.03	-1.59	0.49	-0.4	-0.84	0.51	0.61	1.08	-0.23	0.06	0.51	-0.25	-0.6	0.13	-0.42	0.32	0.62
ATP5G3	-1.74	-1.68	-1.13	-2.18	-2.2	0.08	-0.17	-1.41	-0.97	0	-0.7	-0.26	-1.03	-0.16	1.24	0.74	-0.22	-1.02	-1.66	-1	-0.74	0.07	0.36	-0.46	0.39	0.29	-0.79	0.58	-0.29	0.7	-0.34
LGI3	-0.41	-0.46	-0.4	-1.61	-2.2	-2.85	-0.86	-2.48	-3.54	-1.04	-1.2	0.18	0.7	0.16	0.57	-0.12	1.17	0.66	-0.24	0.24	1.12	-0.05	-1.1	0.32	0.35	-1.04	0.01	0.36	-0.12	-0.96	-0.41
OR2C3	-0.78	-0.12	-0.36	0.06	-2.2	1.7	1.08	1.15	1.57	0.36	0.46	-0.37	0.86	0.14	0.48	0.77	0.64	-0.42	-1.18	-0.35	-0.97	0.56	0.33	0.06	-0.37	0.62	0.97	0.22	0.47	0.38	1
PPP2R4	-7.2	-9.35	-2.9	-1.09	-2.2	-4.86	-3.33	-5.67	-6.27	-4.56	0.62	-0.59	-1.75	-13.64	-10.59	0.01	-3.41	-0.74	1.87	-1.07	-2.43	-2.71	-10.58	2.17	-8.29	-6.41	-3.44	-16.14	-3.89	-1.1	-3.04
RNF165	-0.38	-1.82	0.88	0.67	-2.2	0.14	0.29	-1.39	-0.28	0.24	0.13	-1.33	0.12	0.04	-1.01	0.49	0.16	0.06	-0.06	-0.16	-0.46	0.17	-0.34	-0.13	0.41	1.03	0.73	-0.24	0.38	-0.45	0.54
SACM1L	-1.61	-1.3	-0.79	-2.17	-2.2	-0.64	1.26	-0.45	1.02	0.27	-2.35	-2.15	-1.14	-0.07	1.42	-0.24	0.79	1.22	0.39	0.54	0.72	0.97	0.87	0.58	1.73	0.98	0.86	-0.6	0.62	0.94	0.88
C1GALT1	-0.29	-0.86	-0.03	-0.81	-2.19	-0.54	-1.17	0.31	-0.34	-1.4	-1.04	-0.84	0.21	-1.16	0.08	-1.39	-0.61	-0.33	-0.43	-1	-1.66	-3.12	0.91	-0.67	0.53	-0.32	1.15	-1.24	-1.2	-2.31	1.33
DCAF17	0.36	-0.94	-1.56	-1.58	-2.19	-0.9	-0.84	-0.77	-1.23	-0.54	-0.71	0.54	1.25	-0.87	0.27	0	-1.2	-0.93	-0.08	-0.77	-0.79	-0.28	0.78	-0.42	-0.2	0.53	0.29	0.15	-0.13	-0.52	0.2
DUT	-1.47	-0.53	-4.89	-0.46	-2.19	-2.94	0.13	-3.75	-2.24	-1.14	-0.78	2.62	-8.72	0.11	-0.59	-1.74	-0.39	0.92	0.14	0.97	0.51	1.68	-5.19	-3.82	-0.86	-4.8	-1.73	-3.54	1.04	-0.67	-0.26
FXYD3	-0.83	-0.89	-0.73	-1.86	-2.19	-1.55	-0.52	-0.33	-0.8	-0.67	0.73	1.34	0.34	-0.38	1.3	0.02	3.16	-0.11	-0.82	-0.67	-0.94	0.51	1.71	1.42	1.41	1.43	1.46	0.31	0.84	-0.49	0.5
HOXA1	-0.25	-0.86	-0.02	-0.56	-2.19	0.29	1.43	0.39	0.8	1.14	1.13	-0.34	-1.69	-1.05	-0.07	0.94	1.1	0.2	-0.05	-0.11	1.08	-0.24	0.17	0.18	0.97	0.75	0.51	0.68	-0.58	-0.81	-1.08
MNS1	-1.63	-0.84	-0.51	-1.6	-2.19	-1.11	0.04	-0.17	0.24	0.56	-1.41	-2.33	-0.2	-0.26	-2.03	-2.48	0.49	-4.05	-1.01	-0.97	-0.46	0.09	-0.06	-0.81	-3.47	-2.14	0.25	-0.57	-0.13	-0.15	0.62
NRG3	-1.55	-1.29	-1.03	-1.23	-2.19	-1.13	-1.66	-1.37	-2.28	0.12	0.14	0.65	0.79	-0.28	0.57	-1.67	0.91	-0.31	-0.79	-0.68	-0.95	-0.4	1.05	-0.23	0.12	-0.46	0.84	-0.75	0.88	2.59	-0.73
BORA	-1.13	-1.43	-0.81	-1.23	-2.18	-2.29	-1.19	-0.61	-0.87	-0.72	-0.35	-0.48	-0.28	-1.9	-0.82	-2.66	0.28	0.31	0.44	-1.04	-1.4	-2.74	-1.34	-1.55	-0.28	-0.28	-0.48	-0.92	0.18	-0.18	0.06
DLL4	-1.22	-0.5	-0.23	-0.38	-2.18	-0.47	0.47	-1.23	-0.43	0.11	1.41	0.89	-0.21	-0.07	-0.92	-2.3	-0.92	-0.37	-0.64	0.07	-0.89	0.71	-0.67	-0.06	-0.7	-0.24	-0.86	-0.92	-0.11	0.6	0.88
FAM177B	-1.19	-1.25	-1.42	-2.1	-2.18	-0.05	-1.14	-0.19	-0.67	0.23	0.06	0.75	-0.11	0.17	-0.38	0.59	-0.12	1.24	0.74	0.37	0.09	-1.19	0.96	0.13	0.72	0.37	0.14	-0.37	0.3	0.76	1.47
IGSF21	-0.91	-0.28	-0.2	-0.09	-2.18	0.16	1.09	-0.29	-0.19	0.36	-0.05	1	-1.08	1.03	-0.22	0.54	-0.76	-0.34	0.59	-0.02	0.47	-0.25	0.38	-0.21	0.83	0.8	0.52	-0.23	-0.19	0.56	-0.14
MKS1	-0.97	0.01	-1.42	-1.01	-2.18	-0.54	-0.12	-0.43	0.94	-1.07	0.9	0.21	-1.7	0.66	-1.13	0.27	0.54	-0.62	-0.14	0.2	0.66	-1.27	0.14	-0.98	-0.16	-1.63	-2.81	0.98	-1.05	-0.29	-0.37
NAIF1	-1.2	0.6	-0.4	-0.34	-2.18	0.08	0.36	-1.17	-0.37	0.32	1.39	1.1	0.5	-1.14	-0.3	-0.92	0.91	1.01	-0.26	0.73	0.45	0.76	0.47	1.24	1.88	1.64	1.59	-0.01	0.45	-0.67	-0.88
PATE3	-0.92	0	0.23	-0.78	-2.18	-0.47	0.86	0.19	0.53	0.5	-0.53	-0.95	0.06	0.12	-0.29	0.62	-0.9	-0.24	-0.67	-1.06	-1.27	-0.03	-0.37	0.32	-0.75	-0.26	-0.55	-0.43	-1.04	1.26	-0.59
SYCE1	-2.52	-2.21	-3.56	-2	-2.18	0.18	-0.07	-0.04	0.13	-0.36	-1.53	-1.16	0.25	0.9	0.9	-0.72	-0.91	-0.88	0.01	0.59	-0.49	-1.5	-0.44	-0.23	-1.14	-0.96	-0.75	0.33	0.2	0.69	0.68
TMEM42	-0.53	0.07	-0.29	-0.88	-2.18	-0.03	0.01	0.79	0.6	1.48	2.52	1.9	0.04	0.35	-0.1	-0.17	0.03	-1.75	-0.75	-0.28	0.16	0.27	0.63	0.43	1.27	1.09	0.75	0.04	-1.62	-2.64	-0.96
BTBD16	-1.02	-1.37	-1.89	-2.09	-2.17	-0.28	0.18	0.94	-0.51	-0.65	0.14	0.43	-0.26	1.58	0.51	-1.11	-1.01	-0.53	0.4	0.16	-0.61	0.06	-0.41	0.17	-0.32	-0.22	-0.27	-0.63	-0.44	-0.06	1.38
FAM134C	-1.76	-2.59	-1.54	-1.47	-2.17	1.36	0.25	-0.18	1.16	0.63	1.23	-0.36	-0.36	0.43	-0.09	1.42	0.56	1.52	0.45	-0.31	-0.44	1.22	-1.04	0.39	-0.48	-0.15	-0.06	0.88	1.37	0.98	0.64
LCT	-4.36	-2.5	-1.9	-3.83	-2.17	-0.54	0.88	0.55	-0.32	0.1	0.19	-0.02	-1.43	-0.03	-0.49	-1	0.41	1.25	-0.04	0.98	0.7	1.02	0.05	0.07	0.93	0.54	0.06	-1.6	0.89	-0.56	0.61
LRRC14	-1.25	-0.02	-1.47	-1.09	-2.17	-0.95	0.5	0.5	-0.32	-0.86	-1.35	-1.54	1.58	-0.61	0.19	0.59	0.81	0.17	0.76	-1	-0.56	-0.37	0.07	-0.49	0.38	-0.62	0.4	0.27	0.87	-0.72	-0.6
MADCAM1	0.17	0.01	1.7	0.49	-2.17	2.42	2.72	2.11	1.58	1.69	0.97	0.44	-1.06	-0.76	1.01	2.48	0.32	0.67	-0.44	0.66	0.77	0.23	-0.56	0.23	0.59	0.82	0.97	-0.32	0.62	-0.58	1.02
MLLT10	-1.46	0.22	-2.02	-1.35	-2.17	0.07	0.45	0.02	-0.02	0.75	1.39	-0.08	-0.59	-0.1	-0.8	-0.2	0.42	0.6	0.48	-0.74	0.16	-0.05	-0.22	1.74	0.75	0.86	0.86	1.65	0.3	1.86	-0.84
POU3F3	-3.22	-0.71	-2.39	-2.04	-2.17	-0.99	0.19	-1.12	-0.72	-1.25	-1.3	0.41	0.69	1.48	0.04	-0.24	-0.8	-0.45	-0.08	-0.02	0.43	-0.46	0.82	0.15	0.43	1.3	-0.59	-1.33	0.35	0.05	-0.04
RASIP1	-0.91	-0.24	-1.11	-0.95	-2.17	0.63	0.71	-0.99	0.23	-0.21	-0.45	0.21	-0.84	-0.12	0.33	0.51	-0.7	1.74	0.34	0.25	0.19	-0.16	-0.78	-0.41	-0.55	0.19	-0.51	0.2	2.03	0.75	0.45
RIPPLY2	-0.48	-1.67	-0.62	-1.34	-2.17	0.56	1.09	0.8	0.39	0.93	0.25	0.35	0	-0.09	-0.21	-0.79	-1.22	-0.12	0.19	0.47	0.9	-0.32	-0.73	0.74	0.79	0.19	-1.96	0.63	-0.22	0.26	-0.93
SPAG5	-0.85	-1.61	0.25	-1.33	-2.17	0.69	-1.44	-1.44	-0.03	-0.96	0.02	-0.21	-1.14	-1.18	-0.68	-0.3	-1.86	-0.57	-0.16	-0.76	-0.11	-0.78	-0.73	-2.17	-1.41	-1.55	-1.57	-1.43	-0.87	0.06	-0.46
ACTG2	-1.51	-0.43	-0.33	0.24	-2.16	-1.24	-1.23	-1.21	-0.64	-0.47	-1.7	-1.27	-0.05	1.6	-0.32	0.42	-0.26	0.06	-0.16	0.4	-0.06	-0.57	0.24	0.4	1.76	0.26	0.11	0.36	-0.65	-1.54	-1.45
FAM170B	-2.25	-0.78	-1.03	-2.62	-2.16	-1.08	1.29	-0.57	-0.11	-0.5	-0.33	0.06	-0.49	0.34	0.12	-0.07	0.21	0.69	-1.07	-0.62	-1.28	-1.06	-0.45	0.09	0.28	-0.25	0.08	-0.01	-0.07	-0.18	-0.2
GTF2E2	-0.98	-0.71	-1.46	-0.95	-2.16	-0.96	0.47	-0.89	-0.16	-0.89	-0.32	0.85	-1.56	-0.59	0.56	-1.18	-0.68	-2.01	-1.19	-1.29	-1.84	-0.89	-0.85	-1.19	-0.63	-1.98	-0.55	-0.63	0.22	0.4	-0.58
PDLIM1	-0.54	-1.55	-0.61	-0.53	-2.16	-0.03	-0.43	-0.43	-1.71	1.34	-0.63	-1.67	-0.21	0.84	0.53	0.35	-0.12	0.33	-0.59	1.16	0.75	-1.21	-0.59	-0.5	0.38	0.37	-0.11	-0.51	-1.53	-0.21	-1.02
PDZD3	-1.65	-1.76	-1.52	-1.41	-2.16	-0.11	-0.56	0.6	0.28	-0.16	0.61	-0.54	0.45	-0.29	0.6	-0.15	-2.18	-1.6	-1.22	-0.61	-0.87	-1.38	-1.01	-0.17	-0.86	-0.64	-0.56	0.69	1.3	1.19	-0.05
PTGER3	-1.5	-1.36	-1.34	-0.67	-2.16	1.9	1.87	1.69	1.11	1.62	-0.64	0.18	0	-0.38	1.21	0.76	0.15	-0.91	-0.17	-0.23	-0.5	0.38	0.92	-0.19	0.41	-0.24	1	0.02	0.36	-0.71	-1.31
SLC23A3	-0.57	-0.83	-1.21	-1.38	-2.16	0.26	0.2	-0.13	0.21	-0.6	-0.3	-1.38	-0.15	-1.67	-0.15	-0.6	-1.2	-0.46	0.5	-0.15	-0.31	-0.36	0.15	0.76	-1.13	-0.31	-0.87	0.21	1.15	0.34	0.65
CRYAA	-0.33	-0.21	0.4	-0.61	-2.15	-0.54	0.87	0.77	-0.02	0.79	0.91	0.99	-0.3	0.6	-0.03	-1.27	-0.26	0.42	0.17	0.24	0.66	0.57	-0.32	0.17	0.27	0.4	-0.41	-0.32	-0.02	0.33	-1.59
HIST1H2BO	-0.3	-0.76	-0.65	-0.63	-2.15	0.57	0.59	-0.1	0.56	1.12	NA	NA	NA	NA	NA	0.08	NA	NA	NA	NA	NA	1.02	-1.4	-0.31	-0.33	-0.45	-2	0.1	-0.28	0.75	-0.71
HNRNPH2	-2.35	-1.37	-1.56	-2.11	-2.15	-0.01	0.18	0.58	0.32	0.64	-1.63	0.13	1.19	0.73	1.2	-0.45	1.56	-0.24	-0.08	0.83	0.86	-0.24	0.41	0.99	-0.27	0.62	-0.09	-0.22	-0.68	0.95	0.69
MND1	-0.74	-3.87	-2.4	-1.72	-2.15	-2.55	-1.29	-1.88	-3.71	-1.1	-1.98	-2.99	-0.48	-2.2	-2.67	-0.32	-1.25	-0.46	-0.53	-2.32	-2.42	-0.04	-0.66	0.2	-0.48	-1.13	0.25	-1.5	-0.72	-0.11	2.58
MRGPRX2	-1.93	0.07	-0.01	-1.86	-2.15	-0.03	-0.39	0.03	0.57	-0.79	-1.12	0.22	0.35	0.01	0	0	1.32	0.76	0.46	-0.28	-0.69	0.01	-1.58	-0.26	-0.97	-0.13	0.01	1.13	0.11	1.39	-0.11
MYH14	0.1	0.69	-0.11	0.23	-2.15	0.62	0.71	0.66	0.64	-0.17	2.01	2.29	0.7	0.71	-0.19	-0.17	0.84	0.65	0.49	0.06	-0.12	1.06	0.03	0.51	0.6	1.57	-0.07	0.3	2.1	2.16	0.28
NAB1	-0.85	0.23	-0.38	0.03	-2.15	-1.63	-0.13	-0.73	-0.83	0.41	2.58	1.58	-0.66	-0.06	-0.9	0.38	1.41	-1.14	-0.31	-0.1	0.14	0.07	0.03	-0.17	-0.41	0.02	-0.95	-1.97	-2.05	-1.18	-1.43
RAD51B	-3.99	-3.64	-5.63	-1.01	-2.15	-4.14	0.1	-1.04	-3.71	-0.83	-4.03	-4.69	-5.39	-12.88	-11.4	-1.43	-1.86	-1.05	-0.31	-0.83	-1.64	1.45	-2.08	0.34	-3.75	-3.58	1.25	-7.46	-2.06	-0.42	-0.57
RHOBTB1	-1.28	-0.22	-1.38	-0.91	-2.15	0.11	2.37	1.75	0.32	0.74	1.19	1.39	-1.54	0.38	-0.52	0.3	0.04	0.08	-0.99	-1.17	-1.75	1.27	0.12	0.7	1.08	-0.13	0.59	0.04	0.03	1.98	-0.4
ROCK1	-0.08	-2.08	-1.29	-1.17	-2.15	-2.16	-0.49	-0.58	-1.44	-2.58	0.66	-0.63	-0.32	-1.26	-1.66	-0.74	0.72	-1.38	-2.47	-1.91	-1.43	-1.38	-2.31	-1.87	-0.84	-2.85	-1.05	-1.99	0.48	-1.57	0.39
2011-09-01	0.1	0.83	1.65	0.2	-2.15	-0.68	1.4	0.5	0.31	0.73	0.41	-1.03	-0.75	-0.98	-0.38	0.99	-1.88	-0.9	0.12	-0.44	-0.47	-1.21	-0.53	0.21	-0.11	-0.52	-0.9	0.91	-1.1	-1.88	-0.72
SLC6A13	0.39	-0.39	-0.24	-0.45	-2.15	-0.1	-0.93	-1.11	-0.41	-0.32	0.31	0.01	-0.13	0.09	-0.51	0.22	-0.2	0.21	0.11	-0.32	0.15	-0.66	-0.96	0.28	-0.15	0.04	-0.33	-1	-0.53	-2.16	0.02
ZMYND8	-0.81	-1.48	-0.45	-0.76	-2.15	-0.61	-0.5	0.01	-1.04	-0.68	0.01	-0.08	0.04	0.58	0.37	-0.65	1.14	0.6	0	-0.51	-2.04	0.59	-2.12	0.26	-1.18	-0.09	-0.39	-0.08	-0.62	-0.88	-0.05
ZNF14	-1.05	-1.75	-1.94	-3.01	-2.15	0.19	0.02	-1.22	-0.15	0.5	0.81	0.21	-0.04	0.68	-0.32	0.68	-1.18	0.02	-0.49	-1.07	-1.1	0.95	-0.68	-0.75	-1.51	-0.93	-0.06	0.06	1.44	0.98	1.86
ACADM	-0.91	-2.26	-1.75	-0.24	-2.14	-0.89	-2.08	-0.09	-0.3	-0.8	0.01	-0.28	0.55	0.2	-0.3	-0.63	-0.29	0.71	-0.24	0.83	0.05	0.16	-0.03	0.4	1.17	0.62	-0.62	-0.03	-0.62	-0.22	0.36
DKK2	-1.29	-0.02	-0.53	-1.89	-2.14	-0.23	-0.46	0.75	-0.18	-0.84	1.54	0.88	-0.2	0.37	-0.13	0.75	0.66	0.98	-0.22	0.15	0.96	0.64	-0.37	0.07	-0.16	0.12	-0.83	0.24	0.04	1.05	1.1
HMCES	0.9	-1.09	0.48	0.42	-2.14	-0.23	-1.86	-0.2	0.27	-0.75	-0.26	0.59	-0.94	0.21	-0.51	0.14	1.23	0.3	-1.43	0.5	-0.2	0	-5.67	0.31	1.09	-9.44	0.27	-0.43	0.11	0.25	-1.22
IGSF22	-1.05	-1	-0.66	-1.43	-2.14	0.2	0.05	0.3	-0.66	0.08	1.1	-1.13	-0.58	0.06	-0.04	-1.1	1.36	-0.8	0.36	0.37	1.1	0.05	0.72	1.16	2.03	2.42	1.97	0.83	0.54	-0.97	0.5
KIFC1	-1.51	-1.04	-1.4	-1.76	-2.14	0.07	-1.44	-0.96	-0.2	0.24	-0.93	0.08	1.21	1.14	-0.04	1.03	0.26	-0.21	-1.11	-0.28	-0.44	-0.93	-0.03	-1.32	1.21	0.55	0.75	-0.53	0.91	-0.61	-0.3
PCDHGC4	-1.93	-0.28	-0.73	-1.12	-2.14	-0.2	0.72	0.03	-0.34	-0.21	-0.22	1.09	1.2	-0.28	0.55	-0.19	1.13	2.18	-0.24	0.73	1.07	0.49	-0.11	0.09	0.07	0.7	0.47	0.55	1.55	-0.08	-0.38
SECISBP2L	-0.45	-1.79	-1.98	-0.93	-2.14	-1.97	-1.27	-0.8	0.45	-0.76	-2.41	-1.35	-1.61	-0.96	-1.09	-3.91	1.37	1.01	0.34	0.2	0.79	0.74	1.21	-0.03	-0.33	0.6	0.25	-0.41	0.5	-0.18	0.18
SWAP70	0.37	-1.4	-0.27	0.71	-2.14	-0.37	1.1	-0.02	0.14	-1.1	0.54	1.74	-1.48	0.47	1.29	-1.06	0.49	0.44	0.65	-0.29	-0.34	-1.33	0.6	0.08	-0.35	-0.31	0.47	0.11	-0.73	-0.86	-0.52
TRAPPC2L	0.38	-1.4	-1.86	-1.12	-2.14	-0.01	1.02	-0.07	0.26	0.11	4.29	5.97	-0.63	-0.62	-0.83	2.32	-1.31	0.65	-1.18	-2.15	-2.37	-0.83	-0.9	0.38	-1.96	-0.74	0.6	0.18	-0.2	0.25	-0.94
TRPV6	-0.28	-1.28	-1.59	0.24	-2.14	1.12	0.24	0.19	0.29	1.37	-0.61	1.53	0.88	-0.61	-0.03	0.61	-0.14	-1.02	-0.69	-1.13	-1.85	0.58	-0.6	-0.83	-1.22	-1.42	-1.31	-0.1	-0.38	1.15	-0.52
TSPO	0.77	-1.8	-0.46	0.27	-2.14	1.01	0.64	0.55	0.46	1.15	-0.43	-0.29	-1.59	0.61	0.82	-1.13	1.54	0.3	0.67	0.09	-0.09	-1.12	0.2	-0.37	-0.36	-0.45	-1.79	1.36	1.48	0.65	-0.24
C11orf40	-0.7	-1.28	-1.32	-1.62	-2.13	-0.74	-0.64	-0.78	-0.6	-0.4	0.1	-0.6	2.14	0.73	0.14	1.17	-1.14	-0.74	0.04	-0.78	-0.52	-1.43	0.98	1.51	0.4	2.03	1.32	0.95	-0.43	-0.65	0.45
FLRT3	-0.63	-0.77	-1.42	-0.58	-2.13	2.38	0.8	1.58	1.27	1.1	-1.68	-1.22	0.85	1.31	-0.65	0.67	-1.29	-2.47	-1.01	-1.77	-2.25	1.37	-0.3	0.43	-1.25	-0.29	0.06	0.38	0.07	0.97	-1.46
MDC1	-2.78	-2.39	-5.48	-0.88	-2.13	-3.24	1.25	-0.14	-2.87	-2.05	-3.93	-1.44	-3.56	-1.65	-1.39	-2.38	-1.49	0.87	-0.25	0.34	-0.59	1.75	-2.69	0.24	-1.9	-6.47	-0.19	-3.42	0	-0.68	0.01
TDP1	-0.74	-3.46	-1.21	-1.75	-2.13	-0.15	-0.29	0.13	-0.95	-0.65	-2.64	-0.69	1.19	0.69	0.66	-0.14	-0.14	0.47	-0.63	0.36	-2.4	-0.57	0.24	1	1.35	-2.38	1	-10.99	-0.29	-1.33	-0.84
CHRNA6	0.13	-0.26	-1.45	-0.64	-2.12	-1.71	-2.4	-1.25	-0.74	-0.9	-0.78	-0.86	-0.31	-0.38	-0.21	-1.1	-0.83	0.24	0	-0.32	0.24	-0.68	-1.4	-0.34	-0.61	-0.58	-1.68	-0.23	0.07	-1.05	0
MFSD12	-0.62	0.95	-0.48	0.88	-2.12	2.07	2.02	1.78	2.48	0.71	-0.05	-0.38	-0.56	1.13	0.05	-0.36	1.16	1.66	-0.85	-0.94	-1.61	-0.25	0.66	-0.05	-0.76	0.19	1.4	1.11	0.94	0.36	1.33
MYH10	-1.14	-1.21	-1.56	-0.34	-2.12	0.4	-0.86	-1.21	0.01	-0.66	1.22	0.23	0.83	0.67	-0.65	-1.28	-1.35	-0.34	-0.59	-1.3	-0.78	0.34	-0.61	-0.98	-1.24	-0.81	-1.85	0.17	-0.97	0	-1.19
PLAGL2	0.11	-1.82	-0.04	-0.88	-2.12	0.59	-0.33	-1.03	0.19	-1.73	0.42	-1.5	0.95	-1.8	-0.47	0.53	-0.38	-0.5	0.33	-0.43	-0.75	-1.27	0.16	0.4	-0.21	0.12	-0.12	-0.43	-0.42	0.88	0.26
RNF14	-1.72	-0.47	-0.93	-1.98	-2.12	-0.44	-1.11	0.04	0.76	0.48	0.25	-2.13	0.22	-0.03	-1.96	0.93	-2.2	-1.87	0.09	-1.28	-2.02	0.8	-0.57	0.74	-1.34	-0.96	-0.81	0.37	-0.95	1.58	0.08
SLC20A2	0.28	-0.79	-0.18	-0.36	-2.12	0.57	-1.58	-1.25	-0.61	-0.03	-0.06	-0.49	-0.16	0.32	-0.22	-0.16	1.02	-0.05	0.09	-0.38	0.28	0.23	0.33	-0.22	-0.11	-0.89	0.76	0.48	-1.67	-1.13	-1.12
TEP1	-1.52	-1.08	-1.18	-2.66	-2.12	-0.11	0.45	-0.03	-0.47	0.71	-0.32	-0.96	-0.99	0.2	0.43	2.14	0.45	1.24	0.55	-0.83	-0.41	1.31	-0.09	-0.05	-0.11	-0.12	0.21	1.16	-2.24	-1.22	-1.18
C11orf71	-0.5	-0.59	-0.33	-0.11	-2.11	0.56	0.81	0.15	1.45	1.27	0.94	0.88	0.68	0.86	1.22	0.61	0.83	0.96	-0.26	-0.28	0.95	1.87	0.94	0.03	1.55	1.81	2.13	0.33	1.74	0.59	0.58
C17orf85	-0.45	-2.35	-1.47	0.12	-2.11	-0.17	-0.92	-0.74	-1.42	-0.57	1.51	0.17	-2.7	-0.78	-1.35	-0.85	-0.64	-0.13	-1.34	-0.61	-1.07	-0.57	-0.66	-0.33	1.16	-0.23	1.09	-1.48	-2.11	-1.76	-1.21
GABBR1	-1.06	-0.64	-1.39	-2.2	-2.11	1.34	0.66	1.38	1.1	-0.47	0.25	0.61	0.5	0.27	0.67	-0.88	-1.4	-0.65	0.29	1.16	0.93	-0.27	-0.06	0.18	0.52	1.26	0.5	0.28	0.02	0.54	-1.27
OR5A1	-0.91	0.91	-0.39	-1.61	-2.11	0.01	0.71	0.66	-1.28	1.11	1.85	0.97	0.62	0.42	-0.39	0.63	-0.7	-0.12	-0.04	0.45	0.12	-0.4	-0.13	0.39	0.51	0.14	0.78	-0.38	-1.2	-0.49	0.55
PWWP2B	-0.42	-1.78	-0.84	-1.46	-2.11	1.35	0.91	-0.07	1.18	0.7	-2.05	0.86	-1.6	-0.04	1.14	0.18	-0.66	-0.11	0.22	0.67	-0.09	1.04	-0.12	-0.71	0.72	-0.97	-0.1	0.15	1.19	1.92	0.89
RHBDD2	-2.01	-1.7	-0.4	0.17	-2.11	1.04	1.1	0.8	0.33	0.91	-0.3	0.89	-0.5	1.1	0.2	-1.2	0.47	-0.4	-0.11	-0.47	-0.91	1.25	0.02	0.65	0.73	0.42	1.02	-0.69	0.29	-0.06	0.25
RNF113A	-0.69	-1.01	-2.2	-1.4	-2.11	1.4	0.55	1.69	0.61	2.17	-0.81	0.14	0.56	1.12	-0.17	-1.18	-1.23	-1.23	-0.99	-0.07	0.12	0.54	-1.37	-0.56	-0.84	-1.98	-3.4	0.46	1.18	0.73	0.76
RNF181	-1.5	-0.41	-0.43	-1.44	-2.11	0.73	1.1	1.06	0.29	1.21	0.14	-0.07	0.48	-1.12	0.36	-0.93	0.24	0.18	-0.59	-1.48	-0.92	0.02	0.26	-0.52	0.23	-0.02	-0.63	-0.74	-0.74	-0.84	-0.27
SPOP	-0.08	-0.63	-4.05	0.37	-2.11	-1.22	0.33	0.45	0.19	0.39	1.56	1.7	0.22	-3.33	-3.38	-1.01	0.98	0.49	-1.73	-1.33	-0.34	1.14	-0.6	-3.29	-2.45	-3.52	-5.72	2.84	-3.47	-3.4	-2.36
AQP6	-1.43	-1.75	-1.35	-0.99	-2.1	-0.96	-0.28	-1.57	-0.93	-0.34	-0.41	0.86	0.42	-0.15	0.92	-1.24	-0.37	-0.08	-0.55	-1.01	-0.82	0.62	0.24	0.91	-0.22	-0.02	-0.3	-0.02	-0.6	1.51	0.82
CHD7	-1.2	-1.72	-0.12	-0.12	-2.1	-0.61	0.84	-0.24	-0.77	-0.45	-0.48	-0.48	-0.89	-0.27	0.62	0.38	-0.38	-1.75	-0.5	-0.49	-0.6	0.15	0.73	-0.5	0.3	-1.28	0.06	-1.45	-0.73	-0.52	0.42
EXOSC2	0.43	-0.14	0.65	0.48	-2.1	-0.39	0.7	0.78	0.45	0.32	1.81	1.12	0.42	-0.6	0.43	1.06	1.48	-0.73	3.9	4.72	5.07	-0.06	-0.08	-0.22	0.1	-0.95	0.06	-1.45	-0.92	-1	-1.21
FBXO45	0.26	-1.23	0.15	0.36	-2.1	-0.53	-0.59	0.25	-0.35	-0.61	0.09	-0.92	0.49	0	0.36	0.2	-0.19	-0.98	-0.63	-0.36	-0.11	-1.11	0.35	-0.18	0.54	0.56	0.16	-0.44	0.54	0.63	0.38
HEPACAM	-2.14	-0.16	-1.13	-1.7	-2.1	-0.91	-0.66	0.25	1.54	-0.47	-0.84	-0.38	-0.36	-0.56	0.28	-1.63	0.44	-1.01	-0.84	-1.02	-1.39	0.39	0.65	-0.06	-0.14	0.18	0.28	0.37	0.62	1.02	0.2
METTL8	-1.29	-2.38	-0.58	-1.11	-2.1	0.26	0.03	1.51	0.21	0.58	-0.7	-1.91	-1.08	-0.92	0.49	-1.08	-0.72	-0.1	-0.7	-0.6	-0.09	-0.65	0.4	0	0.65	0.59	-1.04	0.43	-0.53	0.94	1.02
PCDHA6	0.6	-1.96	-1.85	-0.34	-2.1	-0.19	-0.45	0.06	-1.22	-0.35	-0.12	1.26	0.52	0.74	1.33	0.75	-0.52	-1.58	-0.9	-0.04	0.23	-0.07	2.27	1.05	1.48	1.38	0.87	-0.49	1.27	0.08	-0.32
PDPR	-0.43	-0.14	0.94	-0.32	-2.1	0.05	0.99	-0.84	-0.53	0.96	-0.93	-0.89	-0.39	-0.2	-0.15	0.78	-0.25	0.1	0.19	1.26	0.69	-0.28	0.38	1.17	-0.58	-0.1	0.91	-0.92	0.38	0.4	-0.1
HAPLN2	-0.6	-2.52	-1.23	-1.14	-2.09	-0.65	-1.05	-0.18	-0.62	0.19	-1.66	-3.37	1.5	0.1	0.64	-0.51	0.45	0.52	0.61	1.04	0.93	0.71	0.62	0.3	0.71	0.19	0.62	0.23	1.17	0.91	-0.23
LTBP2	-0.73	-0.29	0.05	-0.15	-2.09	-0.79	0.25	-0.6	0.64	0.84	-0.94	0.11	0.09	0.64	-0.1	-0.24	0.84	0.31	-1.02	-0.13	0.65	0.82	-0.74	-0.09	0.99	0.81	0.03	0.52	1.82	0.59	-0.34
SOWAHB	-1.08	-0.82	-1.76	-0.78	-2.09	-1.3	-1.43	-1.3	-0.45	-0.95	0.4	0.11	1.59	-1.08	1.57	0.59	-1.37	-1.25	-0.03	-0.73	-0.85	-0.2	-0.34	0.04	-0.2	1.21	-0.57	0.34	-0.18	0.25	0.87
UBE2F	0.96	-2.49	0.34	0.97	-2.09	-0.61	-1.38	-1.51	-0.71	-1.38	-1.37	-1.66	1.45	-2.13	-1.83	-3	-0.53	-0.72	-1.84	-2.37	-2.26	-3.32	-0.53	-2.38	-1.65	-4.26	-3.19	-3.32	0.07	-0.36	1.83
ARNTL2	0.23	-1.4	-1.36	-2.07	-2.08	-0.94	-1.75	0.29	-0.94	-1.06	1.99	1.92	0.84	0.04	0.34	-0.05	0.29	-0.4	0.74	0.39	1.86	-0.45	1.68	0.64	1.36	0.18	1.43	-0.13	0.23	-0.46	0.42
CAMK2N2	-1.25	-2.09	-1.07	-1.17	-2.08	0.3	0.21	-0.42	0.63	0.28	-0.49	0.45	0.13	-0.22	1.36	-0.81	-1.08	-0.83	-0.44	-0.83	-0.48	0.62	-0.36	-0.08	0.19	-0.54	0.5	-0.41	-0.15	-0.3	0.5
FAM131B	-1.13	-0.59	-1.21	-1.59	-2.08	0.06	0.45	0.71	0.55	0.12	-1.04	-0.48	0.05	-0.32	-0.53	-0.31	0.22	-0.51	-0.18	-0.31	-0.31	0.05	-0.09	0.4	0.05	0.37	0.73	0.44	0.73	0.02	-0.07
HEBP1	-0.95	-0.51	-1.9	-1.63	-2.08	-0.99	0.13	-0.7	-1.1	-0.69	1.75	1.23	0.33	1.4	-0.44	-1.74	0.54	1.7	-0.49	-0.73	-0.56	0.79	0.25	0.9	-0.54	0.27	-0.87	0.07	1.09	0.59	1.33
PIGS	-1.95	-1.41	-0.23	-1.38	-2.08	0.05	0.82	-0.37	0.22	-0.93	0.3	0.59	0.09	0.13	0.08	1	-0.14	0.37	-0.05	-0.09	-0.07	-1.15	-1.14	0.86	-0.47	-0.45	-1.64	-0.99	0.66	0.12	-0.25
PLRG1	-0.54	0.31	-0.1	0.79	-2.08	-0.19	0.33	0.38	0.41	-0.56	-0.71	-1.31	1.7	-1.06	0.63	0.13	-0.49	-0.88	-1.16	-0.19	-1.09	0.38	-0.72	-0.68	-0.27	-0.68	0.08	-0.79	1.57	1	0.76
TCFL5	-0.35	-0.81	-1.05	-1.7	-2.08	0.21	0.7	0.92	0.9	-0.37	-0.52	-0.89	-0.1	-0.85	-0.43	0.18	0.73	1.01	0.29	0.74	0.93	0.69	-0.03	-0.52	-0.15	-1.07	-0.87	0.09	0.63	0.6	-0.16
TMEM79	-2.01	-0.46	-1	-2.62	-2.08	-0.04	-1.14	-0.65	-1.26	-0.59	0.5	0.54	0.37	0.21	-0.7	-0.44	-0.18	-0.54	-0.05	0.39	0.5	-0.09	0.62	-0.92	0.91	-0.68	0.09	0.28	2.15	1.36	1.49
GPR112	-1.14	-3.21	-0.68	-2.23	-2.07	-0.53	-0.02	0.11	0.08	0.43	-0.56	0.28	-0.45	-0.3	0.09	0.67	0.14	1.04	-0.21	-0.02	0.59	0.75	0.06	-0.07	0.83	0.12	0.65	-0.14	0.05	-0.12	1.81
ART4	-0.55	-1.36	-2.58	-1.31	-2.06	-1.28	-2.06	-2.14	-1.54	-1.62	-0.37	-0.83	0.85	0.48	0.79	-0.05	-2.3	-1.65	-1.71	-0.53	-0.09	-0.25	0.52	0.05	0.59	-0.69	-0.05	-0.34	-0.42	-0.17	-0.56
CLPTM1L	0.26	-0.76	-0.1	0.62	-2.06	0.2	0.15	0.21	0.99	-1.05	-0.05	-0.76	-0.01	-0.47	1.51	1.39	0.47	-1.11	-2.47	-0.41	-0.36	-0.64	1.31	-0.17	0.17	0.24	0.07	-0.12	-1.12	-0.31	0.2
ESM1	-1.45	-0.24	-1.44	-2.01	-2.06	-0.2	0.23	0.18	0.01	0.24	0.22	0.96	-0.89	0.15	0.28	-0.68	1.39	0.16	0.03	1.08	0.51	-0.45	-0.79	-0.88	-0.13	0.25	0.13	-0.61	1.03	1.12	0.66
EXPH5	-2.68	-1.08	-2.87	-3.34	-2.06	0.84	-1.32	0.96	0.15	0.12	-0.98	-0.18	-0.37	0.3	0.23	1.14	-1.69	-0.72	-1.07	-1.12	-0.74	-0.31	0.03	0.32	-0.35	-0.09	-0.45	1.57	0.39	-0.01	0.23
GDAP1	0.12	-0.69	0.2	-1.28	-2.06	-0.54	-0.83	-2.01	-2.38	-1.18	-0.96	-0.29	0.43	-0.96	0.57	-0.54	0.35	0.88	0.48	-0.91	-1.65	0.24	-0.51	-0.27	-0.56	-0.87	-0.27	0.67	0.07	-0.77	-0.2
INSL3	-0.24	0.37	-0.79	-0.74	-2.06	1.65	0.55	-0.71	-0.1	0.98	0.5	0.02	1.26	0.03	0.48	0.32	0.74	1.03	0.42	0.37	0.51	-0.77	-0.07	-0.55	-0.07	-0.46	-0.3	0.29	-0.68	0.42	-0.05
MTFR1L	-1.47	-0.76	-0.73	-0.72	-2.06	1.02	0.15	0.18	-0.64	0.38	0.03	0.66	-0.49	0.76	1.02	-0.96	-0.04	-0.96	0.26	-0.9	-0.16	0.18	1.32	0.27	-0.22	0.58	1.86	-0.5	-1.14	-1.62	-0.25
OR6C3	-1.36	-0.52	-1.76	-1.36	-2.06	-0.14	-0.83	-0.52	0.48	0.39	0.27	-0.34	0.03	-0.21	-0.41	1.8	-0.85	-0.46	0.19	-0.37	-0.48	0.5	0.98	0.03	0.16	-0.99	-0.25	0.65	-0.1	-1.27	0.48
PDSS1	-0.1	0.84	-0.91	-0.27	-2.06	-0.79	0.2	0.46	0.64	0.87	1.81	-0.61	0.98	0.28	1.36	-0.68	1.1	0.37	-0.18	0.45	0.56	0.53	0.27	-0.18	1.69	1.31	0.12	0.88	0.19	0.59	0.62
SLC6A15	-0.07	0.12	-1.26	0.5	-2.06	0.28	-0.54	0.55	-0.16	0.47	-0.07	-0.13	0.66	0.28	0.76	1.06	0.63	0.41	0.11	0.2	-0.03	-0.17	-0.24	-0.25	-0.32	-0.01	-1.07	-0.17	0.57	0.04	-0.66
SNCB	-2.11	-1.57	-1.06	-0.99	-2.06	0.53	1.3	0.74	0.64	0.29	-0.63	-0.35	-0.96	0.92	0.2	0.87	1.08	0.31	-0.06	-0.17	0.17	1.31	0.03	-1.09	-0.42	0.32	0.05	1.76	-0.34	-1.23	-1.13
UBE2M	-4.76	-3.56	-2.8	2.07	-2.06	-3.98	4.42	-8.04	0.41	-15.74	-4.71	-2.82	-2.19	-7.84	-10.84	-8.84	1.5	0.67	-2.79	2.88	-0.07	-1.69	-7.4	-6.65	-9.05	-7.31	-8.61	-5.07	-3.38	-8.48	-4.83
ADAMTS2	-1.76	-0.82	-2.45	-1.16	-2.05	0.73	0.77	0.78	0.59	1.11	-0.6	0.5	0.4	-0.15	0.62	-0.55	1.39	1.22	-0.07	-0.89	-0.01	-0.97	-0.61	-0.01	-0.25	0.04	-0.21	1	0.47	-0.69	-0.08
ANKRD32	-1.23	-1.49	-1.16	-2.3	-2.05	-2.08	-0.59	-2.58	-1.75	-1.12	0.06	-1.09	1.25	-0.64	-0.42	-1.4	0.68	1.02	0.56	0.18	-0.31	-0.49	0.14	-1.5	-1.68	0.2	-0.19	-1.89	0.74	-0.33	1.36
FARSA	-0.76	NA	0.45	1.03	-2.05	-0.23	0.48	0.82	1.41	0.2	-0.38	0.44	NA	NA	0.71	-0.68	-1.14	-0.23	1.27	1.99	2.66	0.18	-0.68	-0.32	0.31	-0.47	-0.25	-0.69	1.18	0.41	0.52
NFYB	-2.44	-0.23	-2.6	-3.39	-2.05	-1.76	-1.19	-0.64	-2.23	-0.19	0.66	0.17	1.96	-1.34	0.04	-0.12	-0.27	-1.34	0.02	1.02	-0.23	0.55	-0.04	-1.03	0.27	0.6	1.17	0.15	0.35	1.44	1.29
RP11-422N16.3	-1.15	-1.14	-0.75	-2.2	-2.05	1.48	-0.13	1.23	0.35	-0.28	0.01	0.22	0.19	0.92	0.8	-0.65	0.27	-0.51	-0.5	-0.75	-0.15	-0.88	0.04	-0.07	-0.55	-1.15	-1.09	0.49	0.05	-0.24	0.72
TRPV3	-0.17	0.17	-1.12	-0.52	-2.05	0.04	0.22	0.02	0.09	-0.49	-1.51	-1.29	-0.91	1.06	-0.92	1.13	0.44	0.46	-0.42	-0.05	0.63	-1.59	0.27	0.05	1.66	0.87	0.61	-0.24	0.45	-1.38	-0.92
ZNF664	-0.69	0.73	-1.08	-1.35	-2.05	1.01	0.23	1.01	0.57	1.21	-1.45	-0.94	0.39	-0.24	0.28	-0.78	-0.93	-2.34	-0.68	-0.54	-0.86	-1.54	-0.24	-0.52	0.2	-0.39	-1.41	-0.93	-0.85	-0.21	-0.35
AC091801.1	-1.34	-0.53	-1.16	-0.92	-2.04	0.35	0.61	1.01	-0.44	0.44	0.29	0.21	-0.25	0.2	0.99	-0.68	2.18	0.6	0.14	-1.35	-1.35	-1.72	0.03	0.5	-0.65	-0.05	-0.42	1.03	1.02	0.99	1.45
CMC4	-0.3	0.41	-1.17	-0.5	-2.04	0.38	-0.31	0.38	-0.65	0.22	-0.38	-1.74	-1.48	-0.53	0.14	0.28	0.22	0.32	0.57	-1.01	-0.19	-0.3	1.29	0.84	1.36	0.63	0.4	0.13	-1.11	-0.38	0.6
COMMD5	-1.57	-0.58	-2	-1.12	-2.04	-0.28	0.43	0.11	0.34	-0.24	-1.55	-1.14	0.17	0.19	0.08	-0.05	0.69	1.39	1.96	1.35	1.88	1.08	-0.31	0.95	1	1.25	1.06	0.83	0.25	0.65	-0.57
DNLZ	-1.2	0.12	0.44	-0.16	-2.04	-0.7	0.06	-1.16	-0.55	-0.25	1.15	1.92	-0.2	0.09	0.74	0.78	1.08	1.27	3.12	3.29	2.26	0.76	0.57	1	1.36	1.68	1.45	0.4	-0.25	0.32	-0.76
NEUROD6	-0.69	-2.1	-1.16	-0.98	-2.04	-1.8	-0.61	-1.19	-0.34	-1.26	0.19	-1.81	0.45	0.2	0.3	-0.14	-0.41	-1.85	-0.01	-0.78	-0.15	-0.66	0.61	0.21	-0.74	-0.9	0.33	0.78	-0.65	-0.31	0.33
OAS3	-1.87	-1.55	-1.14	-1.9	-2.04	-1.63	-0.65	-1.2	-1.27	-0.48	-0.97	0.82	0.21	1.26	-0.88	-0.19	0.21	1.05	0.32	-0.32	0.23	0.11	1.12	0.62	0.11	0.71	0.87	1.14	2	1.19	-0.13
PSCA	-0.9	-0.02	-0.51	-0.42	-2.04	1.16	0.45	0.37	0.76	0.7	0.05	-1.16	0.31	-0.87	-0.13	0.38	-0.47	-1.78	-1.46	-1	-0.76	-0.74	0.77	0.1	0.24	-0.7	-0.19	0.72	-0.2	0.08	0.55
SERGEF	-2.14	-1.28	-1.44	-2.08	-2.04	1.48	1.57	1.78	-0.02	-0.36	0.36	0.28	1.65	0.53	0.58	-0.7	0.61	0.79	0.6	0	0.8	-1.92	0.67	1.63	-0.07	-1.09	0.71	1.41	1.12	-0.34	-0.69
SLC22A1	-0.73	0.15	-0.02	-0.39	-2.04	-0.15	0.85	1.15	1.07	0.14	1.04	1.11	-1.67	-1.45	0.88	-0.17	-0.34	-0.06	1.19	-0.14	-0.1	0.74	-0.4	0.23	-1.01	0.24	0.54	0.37	0.02	0.79	1.17
TRPM1	-0.43	-1.22	-1.86	-0.49	-2.04	-0.77	0.16	-0.64	0.89	0.1	-0.47	0.23	1.41	0.55	-1.24	-1.95	1.13	0.26	0.34	0.4	0.44	1.57	0.43	-0.16	-0.42	0.09	-0.35	0.04	2.21	1.97	2.57
ATP6V1C2	0.55	-0.94	-0.49	0.55	-2.03	1.15	0.65	0.5	0.43	0.82	-1.19	-0.44	-0.1	-0.7	-0.39	-0.75	0.49	-0.09	0.06	-0.63	-1.75	-0.91	-0.08	-0.58	-0.95	-1.19	-0.44	-0.49	-1.63	-0.22	0.83
B3GALT5	-3.53	-2.91	-2.88	-3.32	-2.03	0.05	-0.94	-1.28	-1.45	-1.13	0.84	2.15	-0.76	0.36	0.59	0.07	-0.03	0.13	0.7	0.92	1.44	0.42	-0.34	1.98	1.32	0.86	0.53	-0.22	-0.61	-1.16	0.63
CCDC104	-0.34	-0.1	-0.45	-1.54	-2.03	-0.35	-0.14	-0.49	-0.72	-0.85	-0.15	-0.28	0.52	-0.77	0.19	-0.1	-0.16	0.33	-0.16	-0.05	-0.31	-2.06	-0.22	-0.08	0.42	-0.34	-0.75	1.93	-0.11	-1.06	-1.07
CEP72	0.65	-0.96	-0.74	0.06	-2.03	-0.9	0.12	-0.3	-0.81	-0.43	-1.6	-0.74	0.2	0.26	0.14	-0.32	1.26	0.21	-0.38	-0.18	0.07	1.24	1.26	0.95	0.39	0.84	1.12	-0.5	-0.35	0.63	-0.63
OR14A2	0.89	-2.3	-1.7	-1.09	-2.03	-0.52	-0.86	0.55	-0.54	0.03	-0.82	-0.68	0.84	0.1	0.84	-0.15	-1.54	-0.53	-0.83	-0.65	-0.6	-0.73	-0.26	-0.35	-1.46	-0.59	0.1	1.1	-0.55	0.29	0.82
RFNG	-0.63	-0.85	0.17	-1.66	-2.03	2.42	0.65	2.51	1.66	0.33	0.02	1.44	0.07	0.42	-0.07	0.55	1.45	0.27	-0.17	1.7	1.47	0.8	1.79	0.43	1.16	0.25	0.38	0.01	0.2	0.42	-0.41
SAC3D1	-1.04	0.42	0.17	-0.54	-2.03	-0.92	0.67	-0.53	-0.83	0.36	0.59	1.11	0	0.39	0.3	0.42	-0.47	0.27	-0.48	0.57	0.39	-0.1	0.35	0.03	1.47	1.96	0.57	-0.86	0.82	0.72	0.77
SLC22A13	-1.7	0.14	-1.08	-1.58	-2.03	0.92	1.76	0.94	0.91	-0.33	0.32	1.13	-0.45	0.78	0.46	0.19	0.44	0.49	0.28	-0.82	-0.51	-0.12	1.32	-0.06	-0.11	-0.01	1.32	0.82	0.15	1.54	-1.09
ANP32A	-0.18	-1.33	-0.28	0.23	-2.02	0.11	-1.72	-0.39	-0.27	-0.47	0.19	-0.7	0.26	-0.67	-0.25	-1.07	-1.15	-1.52	-0.34	-0.49	0.4	-0.63	0.54	-0.46	-1.38	-1.53	-0.74	-0.61	-1.29	-0.6	-1.12
GALNT11	-0.92	-1.25	-1.01	-1.29	-2.02	-0.37	-0.81	-0.95	-0.65	0.94	-1.52	-0.73	0.11	0.59	-1.32	-2.21	-0.03	-0.57	-0.19	-0.78	-1.44	1.34	-1.61	-0.44	-1.13	-1	-1.26	-0.27	-0.75	-1.27	-1.08
LACTB2	-1.21	-1.05	-1.19	0.25	-2.02	1.17	1.36	0.75	0.88	0.1	-2.7	-1.72	0.51	1.34	0.51	-0.24	0.13	-0.61	-0.77	0.17	-0.38	-0.13	-0.32	0.15	-0.63	-0.57	-1.31	0.6	-0.14	-0.11	-0.16
MS4A14	-0.11	-0.43	-1.17	-1.44	-2.02	-1.05	-0.74	-0.1	-0.88	-0.06	-0.28	-0.28	-0.7	-0.52	-0.22	0.18	-0.23	0.7	-0.29	-1.08	-0.57	0.58	0.43	0.21	-0.37	1.14	1.18	0.25	-1.62	-0.8	-1
PKP4	0.44	-0.74	-0.21	-0.2	-2.02	-0.17	-0.21	-1.1	0.01	0.37	-1.52	0.03	0.55	-0.3	-0.39	-0.33	-0.14	-0.37	0.57	-1.05	-0.77	0.46	-1.36	-0.3	0.49	0.29	-1.02	1.19	0.75	-0.34	-1.02
SPTA1	0.18	-0.99	-0.67	-0.27	-2.02	-0.82	-0.72	0.13	-0.39	0.02	0.1	0.43	-0.85	-0.27	-0.09	-0.01	-1.44	-0.59	-0.59	-1.03	-1.27	0.26	-0.61	0.08	-0.58	-0.56	0.36	-0.35	0.69	1.52	0.9
TNFSF13B	-0.78	-0.4	-2.62	-0.81	-2.02	0.49	-0.4	1.11	0.27	-0.14	-0.16	-0.79	1.55	1.46	0.66	0.01	-0.33	-0.11	-1.15	-0.48	-1.09	-0.68	0.69	-0.34	0.83	0.84	0.8	-0.33	-0.29	0.26	1.01
ANXA11	0.22	-0.08	0.04	-1.18	-2.01	-1.14	-1.04	-0.65	-2.33	-1.27	0.32	-0.43	0.45	0.69	-0.08	0.42	-0.31	-0.43	-0.21	-0.41	-0.34	-0.2	1.78	1.07	0.45	0.01	1.15	0.77	1.29	0.63	-0.04
BRDT	0.58	-1.34	0.16	-0.41	-2.01	-0.6	-2.34	-1.3	-2.3	-0.74	-1.3	-1.29	-0.28	0.8	0.44	2.14	-0.51	-0.45	-0.39	0.13	-0.44	1.53	0.61	0.57	0.24	1.48	-0.18	-0.63	-0.1	0.38	-1.41
DDHD1	1.35	-0.1	0.4	0.86	-2.01	0.14	0.33	0.14	0.1	0.28	-0.2	-0.09	0.92	-1.02	-0.06	-1.1	-0.02	0.88	0.32	-0.55	-1.08	-0.12	-0.2	-1.3	-1.03	-0.56	-0.63	0.9	-0.44	-1.3	0.62
DEGS2	-1.36	-0.75	-0.45	-0.09	-2.01	0.77	1.64	1.73	0.85	0.42	0.48	0.51	0.6	-0.77	-0.05	0.51	0.1	-0.15	-0.98	0.26	0.11	1.22	-0.15	0.06	0.62	0.66	0	-0.01	1.33	0.84	1.23
DPPA3	-1.02	-0.9	-0.99	-1.12	-2.01	-0.9	-2.23	-1.51	-1.92	-1.34	0.1	-1.24	-0.5	-0.02	-0.59	0.29	0.08	0.42	-0.53	-0.21	-0.38	-0.1	-0.09	0.3	-0.81	-0.9	0.42	-0.93	0.85	0.48	1.1
GDPD4	1.12	-0.56	0.25	0.2	-2.01	-0.15	1.34	1.16	-0.2	1.31	-0.92	-0.62	-1.76	1	1.3	-0.28	-1.12	-2.17	-1.67	-0.32	-1.17	-0.89	1.18	0.3	0.94	0.82	1.32	-0.46	1.13	0.67	0.36
MAPK14	0.26	0.46	0.83	0.25	-2.01	-2.34	-2.52	-3.47	-2.33	-0.38	2.13	0.87	2.04	0.22	-0.26	-2.58	-2.34	1.87	-1.9	0.69	0.03	-3.82	-3.04	3.91	-0.9	-0.2	-0.8	-1.42	1.36	-1.9	1.78
NIPA2	0.15	-1.38	-1.53	-1.59	-2.01	-1.63	-1.51	-1.71	-2.52	-0.18	-0.06	0.01	0.43	-0.45	-1.36	0.32	-0.54	0.46	0.63	-0.7	-1.34	0.09	-1.23	-0.46	-0.99	-0.55	-0.43	-0.01	-0.7	1.6	0.65
SCG5	0.77	-2.3	-0.65	0.15	-2.01	0.45	1.08	-0.15	0.55	-0.61	-1.96	-1.34	-0.44	-0.66	-1.23	-0.68	0.74	0.22	0.35	-0.52	-0.65	-0.38	-1.28	-0.54	-1.45	-0.11	0.5	-0.42	-0.06	2.18	1.25
TOMM7	-0.44	-0.26	-0.65	-1.34	-2.01	0.79	1.08	0.3	-0.08	1.51	0.39	-0.57	0.31	-0.66	0.39	-0.94	-0.98	-0.13	-0.27	0.36	-0.01	0.21	-1.13	1.03	0.01	0.09	-1.68	-0.1	-1	0.09	-0.04
AHRR	-0.97	-0.71	0.18	-0.35	-2	-0.23	0.18	0.86	0.66	-0.45	1.36	0.51	1.09	-0.13	-0.19	-1	-0.8	1.37	0.68	0.23	0.22	0.28	0.19	-0.06	0.5	-0.44	0.09	-0.28	-0.73	-0.13	-0.34
BHLHA9	-1.91	-1.15	0.34	-0.5	-2	1.91	1.59	2.55	1.84	1.32	-1.64	0.42	-0.35	-0.32	1.08	-0.34	0.66	0.28	0.69	0.65	0.53	-0.17	-1.51	-0.65	-0.64	-0.64	-1.31	-0.31	0.47	-0.85	0.29
CCDC155	-1.24	0.72	-1.39	0	-2	1	0.63	0.51	1.62	0.88	-0.87	0.21	-0.45	0.19	-0.86	-0.76	0.04	0.74	-0.19	-0.29	-0.26	1.45	-0.51	0.39	0.36	-0.13	-0.26	0.04	1.41	-0.35	1.71
CCDC69	-0.95	-0.85	-0.88	-0.69	-2	-0.13	-0.02	0.46	0.05	-0.58	-0.33	1.05	1.08	-0.18	0.92	0.09	0.62	-0.07	-0.57	0.3	0.41	0.14	0.54	-0.29	-0.51	-1.04	-0.24	0.32	-0.62	0.02	0.55
CPM	-1.16	-2.35	-0.97	-1.76	-2	-0.44	-1.63	-0.09	-0.9	-0.34	0.24	0.62	-0.06	0.1	-0.17	-0.91	-0.38	-1.16	-0.66	-0.41	-0.91	0.22	0.81	0.04	-0.15	-0.25	0.29	0.8	0.41	1.49	0.03
DCLK1	-2.07	-2.32	-1.86	-2.64	-2	-2.26	-1.31	-0.11	-1.52	-1.38	0.49	-0.75	0.74	0.42	0.22	1.25	-2.41	-1.07	-1.54	0.48	-0.54	0.67	0.78	-0.04	1.48	1.52	0.69	-1.27	0.46	-1.09	-0.7
DIAPH3	-0.27	-1.9	-0.94	-0.98	-2	-0.59	-0.92	-0.37	-1.03	-0.57	-0.45	-0.52	-0.8	-1.1	0	-0.26	0.94	1.03	0.24	0.75	-0.48	0.03	-1.97	-0.15	0.17	0.63	-1.18	-0.34	-2.08	-2.64	-3.09
ITGB5	-1.02	-0.15	-1.64	-0.86	-2	-0.57	1.27	-2.16	-0.84	-0.57	-0.59	0.34	0.3	0.35	0.56	NA	-0.31	0.58	2.35	2.7	2.84	-0.23	-0.12	3.46	0.09	0.74	2.15	0.67	-0.29	0.64	-1.25
KRT14	0.62	-1.27	-0.08	0.72	-2	0.09	-0.59	0.71	-0.52	-0.51	1.45	1.13	-1.45	0.15	-0.14	-0.05	-0.39	1.25	-0.49	0.53	0.56	-0.17	0.66	-0.83	0.5	-0.43	-0.02	0.75	0.96	0.45	-0.31
PRPF40B	0.93	0.73	0.87	1.42	-2	1.62	1.5	0.52	0.84	1.88	-1.41	-0.97	0.89	0.15	0.32	-0.64	0.09	0.06	1.46	0.85	0.36	-0.12	-0.55	0.26	0.13	-0.11	0.22	0.4	0.67	-0.4	-0.2
STAT4	-1.02	-2.51	-1.72	-2.95	-2	-0.53	-0.7	0.11	-1.49	-0.8	0.78	-0.05	-0.11	0.31	-0.68	-0.56	-0.6	-0.7	-0.74	-1.67	-1.17	-0.49	0.68	0	0.24	0.79	-0.47	-0.02	-1.5	-0.17	-0.26
TBATA	-0.48	-0.68	-0.65	-0.95	-2	1.19	0.91	1.64	1.06	2.3	-0.49	-0.26	0.76	-0.37	0.58	1.98	-0.8	-0.16	-0.09	0.32	0.44	0.59	0.51	0.48	0.03	-0.05	0.46	1.24	-1.17	0.06	0.07
TEX29	-0.34	0.58	-0.03	-0.81	-2	-0.35	0.44	0.05	-0.63	-0.52	-0.48	-2.42	-0.27	-0.96	0.04	0.99	0.59	0.57	-0.59	-0.68	-0.77	-0.58	-1.69	-0.2	-0.81	0.04	-0.53	1.54	0.72	-1.94	-0.34
ZDHHC15	-1.02	-2.22	-2.26	-1.76	-2	0.28	-0.11	0.94	-0.16	0.78	1.6	-0.17	-0.18	-0.31	0.35	-0.45	-1.14	-0.39	0.03	-0.87	-0.57	0.97	-0.11	-0.57	-1.21	-0.37	-0.25	1.52	0.29	0.04	1.97
C8A	-0.67	-0.75	-0.72	-2.03	-1.99	0.23	-0.4	0.73	-0.68	0.47	0.84	-0.32	-1.78	0.6	0.96	0.9	0.53	-0.29	-0.31	-0.64	-0.36	0.76	0.13	-0.82	0.33	-0.21	-1.16	0.31	0.17	-2.21	-0.78
CPOX	-0.52	0.3	-0.58	-0.43	-1.99	1.7	0.79	0.96	0	1	0.95	1.98	-0.92	-0.37	0.03	-1.26	-0.89	-0.83	-0.68	-0.64	-0.06	0.14	0.64	0.86	0.82	2.74	1.72	0.37	-0.52	0.88	0.79
DEPDC4	-1.11	-0.79	-2.25	-2.47	-1.99	-0.38	-1	0.66	0.81	0.37	-0.58	0.23	-0.25	-0.44	-0.03	-0.2	-0.53	-0.59	-0.44	-0.7	-0.72	-0.27	-0.65	0.25	-0.73	0.17	-0.37	1.06	0.21	-0.31	0.38
GCH1	0.3	0.29	-0.13	-0.33	-1.99	-0.55	0.16	0.07	0.11	0.21	-1.3	0.47	0.08	0.19	-1.21	0.11	0.03	0.15	0.11	0.28	1.33	-0.15	-0.48	0.14	0.59	-0.33	-0.13	-0.83	0.08	-0.04	0.34
MRPL44	-0.28	-1.03	-0.51	-0.13	-1.99	-0.5	0.52	-0.49	-0.42	0.23	0.23	-0.35	-0.11	-0.68	-0.3	-0.57	1.7	-0.77	1.53	1.13	0.7	0.26	0.35	-0.32	2.28	1.38	1.33	0.36	0.46	1.31	-0.11
OR2M4	-0.34	-0.42	-1.48	-0.8	-1.99	0.02	-1.23	-0.18	-0.95	-0.77	-1.76	-1.51	0.7	0.06	1.44	-0.31	0.86	0.81	0.42	-0.11	0.05	0.09	-0.38	0.43	-0.13	0.01	-0.17	0.55	0.39	1.47	1.89
PHF7	-0.23	0.64	0.02	-1.57	-1.99	1.12	1.92	0.76	0.05	1.53	-0.59	-0.02	-1.37	0.15	0.57	-0.53	0.74	0.2	0.33	-0.17	-0.15	1.22	-0.26	-0.59	0.58	0.05	-1.6	1.42	-0.26	0.05	-0.82
S1PR3	-0.29	-1.33	-0.44	-0.69	-1.99	-0.13	1.62	-0.21	0.51	0.79	0.92	1.73	-0.1	0.04	-0.72	0.02	0.45	0.43	0.81	0.12	0.52	0.73	0.21	-0.44	-1.03	-0.31	-0.94	0.03	-0.07	0.46	-0.33
SLC11A1	-0.36	0.4	-1.15	0.38	-1.99	-0.44	2	1.34	1.13	-0.27	-0.62	1.75	0.11	-0.69	-0.45	-0.02	1.11	-1.15	-0.45	-0.7	0.05	1.96	0.69	0.14	1.06	0.71	0.38	0.48	-0.61	-0.44	-0.87
APOD	-1.51	-0.86	-1.87	-2.31	-1.98	0.94	0.18	0.13	-0.29	0.3	-0.56	-0.01	0.67	-1.04	0.62	-0.58	-1.13	0.2	0.17	0.16	0.11	0.96	0.67	0.14	0.47	-0.14	0.95	-0.33	-1.22	0.46	1.1
CYB561D1	-1.98	-1.66	-2.25	-1.77	-1.98	0.47	-1.34	-0.48	0.34	-1.76	-0.36	1	0.56	0.23	0.31	-0.42	-0.26	-1.12	-0.93	0.01	-0.85	0.76	1.06	-0.01	0.2	0.58	-0.1	1.4	-1.17	0.01	-0.47
MRPL45	-0.16	-0.24	0.2	-0.74	-1.98	1.24	0.38	-1.17	0.39	0.86	0.21	-0.69	0.2	0.02	-0.03	-0.98	-0.37	-0.16	1.14	0.03	0.38	0.97	-1.26	-0.79	0.53	0.8	-0.28	0.47	0.02	0.88	0.58
MTFR2	0.73	-0.99	-0.26	-1.01	-1.98	1.09	0.14	0.4	-0.66	-0.32	-0.3	-0.46	-0.51	0.6	0.54	-0.69	-0.06	-0.89	-0.27	-0.61	0	-0.53	-0.36	0.3	-0.71	-1.25	-0.77	-0.29	-0.94	0.07	0.04
PRPF31	-2.47	-1.38	-2.52	-1.93	-1.98	1.41	0	0.32	0.2	-0.15	0.08	0.31	-1.05	-0.42	-0.12	0.05	-0.38	-0.39	-1.08	-1.15	-0.57	0.35	0.78	-0.83	-1.34	-0.54	0.53	-1.12	-0.45	-0.95	-1.79
SLC25A19	-1.36	-1.42	-2.7	-1.34	-1.98	-0.2	-0.13	-0.77	0.4	-0.7	1	0.41	-0.74	0.11	-0.27	2.06	0.91	0.89	0.33	0.06	-0.15	0.83	-0.04	-0.09	-0.96	0.09	-0.39	-0.03	-0.03	-0.29	-0.67
YBX1	-1.04	-1.12	-1.97	-1.14	-1.98	-2.12	-0.55	-1.54	-3.1	-1.48	-0.7	-0.54	0.75	0.25	-1	0.82	-0.31	0.76	1.84	1.13	0.69	0	-0.79	-1.1	-1.09	0.05	-1.9	-0.15	-0.67	-1.16	-0.45
C12orf77	0.28	0.02	0.22	-0.43	-1.97	0.77	-1.11	-0.06	0	-0.98	-0.29	-1.28	0.15	-0.18	-0.23	0.61	1.08	1.03	1	0.82	0.04	-0.13	0.52	-0.3	-0.51	0.22	-0.15	-0.71	0.47	0.47	-0.43
C6orf120	-1.7	-2.18	-0.73	-0.91	-1.97	0.53	0.08	-1.12	0.4	1.17	0.56	0.85	0.88	-0.27	-0.2	1.26	-1.47	-0.81	-0.39	-0.63	-0.75	0.23	0.68	1.18	0.32	1.5	1.67	-0.59	-2.35	0.32	-1.77
DNAH6	-0.92	-0.87	-1.02	-1.63	-1.97	-0.04	0.34	1.72	0.74	1.27	-0.47	-1.68	-0.76	-0.56	0.34	1.16	-0.22	0.02	0.14	-0.15	0.25	0.26	1.76	-0.38	2.18	0.76	0.89	-0.11	0.82	-0.65	-0.31
EPS8L2	-2.17	-0.96	-0.7	-1.53	-1.97	-1.73	-1.32	-2.41	-1.62	-0.78	0.73	0.51	0.44	0.43	0.43	0.64	-0.31	-0.24	-0.37	0.05	-0.09	-1.81	0.8	0.5	1.15	0.5	-0.16	-0.17	0.94	0.49	-0.75
FIGNL1	-2.68	-0.42	-0.51	-0.74	-1.97	-0.11	1.2	-0.77	-0.63	0.41	0.64	-0.6	-1.97	-2.57	-2.5	0.67	-1.14	-1.39	-0.46	-1.12	-0.08	-0.11	-0.52	-1.15	-3.51	-3.01	1.2	0.24	-1.48	0.26	1.4
FOXA2	-1.59	-0.48	-1.9	-1.43	-1.97	1.23	-0.7	-1.24	-0.62	0.35	3.53	2.75	-1	0.44	0.4	1.43	0.84	-0.64	-0.34	-1.05	-1.01	0.18	1.17	0.48	-0.09	-0.09	1.63	1.1	-0.12	-0.72	-0.05
SCRIB	-1.66	-0.49	-0.69	-0.34	-1.97	1.71	2.71	1.26	2.36	2.17	0.18	-0.13	0.2	0.57	0.83	-0.53	1.76	0.68	0.59	0.69	1.36	0.19	0.34	-0.6	0.03	-0.63	-1.21	0.85	-0.42	-0.2	0.46
SDR16C5	-1.05	-1.96	-1.73	-1.61	-1.97	-1.92	-1.49	-1.38	-1.55	-0.86	-0.75	-2.01	0.33	-1.04	-0.75	-0.58	-0.45	0.21	-0.58	-0.59	-0.4	-2	0.16	0.28	-0.35	0.56	1.38	-0.15	-0.15	1.07	0.54
SELPLG	-0.89	0.7	0.36	-0.73	-1.97	0.82	1.73	0.67	-1.12	1.47	-0.76	-0.33	0.02	0.08	0.07	1.65	-0.32	-1.34	-0.79	-0.41	-0.29	2.02	1.94	0.01	0.69	-0.41	1.52	0.62	-0.14	-0.41	1.09
SLC25A4	-1.28	-0.18	-0.99	-1.13	-1.97	-1.6	0.73	1.13	0.75	0.37	0.84	-0.21	0.57	1.03	0.47	0.29	0.98	2.1	0.9	-0.87	-0.74	-0.29	-0.3	-0.62	-0.11	-0.89	-1.02	0.77	0.13	1.53	0.78
TJP2	-1.44	-1.41	-0.77	-1.48	-1.97	0.5	-0.05	0.24	-1.46	-0.05	1.94	0.94	-0.68	-0.45	-0.06	0.59	0.04	0.19	0.01	0.11	0.99	-1.92	1.55	-0.23	0.57	-0.11	-0.95	-0.55	0.52	0.64	0.5
TMC4	-0.66	-0.61	-1.49	-0.61	-1.97	-0.56	1.28	-0.85	-0.88	0.3	-0.24	0.58	0.61	-1.22	0.48	0.94	0	0.72	0.66	0.94	0.99	-1.05	0.65	0.98	-0.48	1.07	0.25	0.2	0.97	-0.07	0.28
TXNIP	-0.62	0.68	1.07	-0.82	-1.97	0.5	-0.03	-0.31	-0.24	1.32	1.22	0.49	0.98	0.25	0.7	1.25	0.58	1.22	0.44	1.68	1.19	1.71	-0.9	-0.16	-0.16	-0.6	0.6	0.66	0.18	0.68	0.51
VPS28	-0.6	0.39	-1.46	0.31	-1.97	-3.07	-2.05	-2.57	-2.82	-2.61	0.1	0.82	0.72	-0.5	0.32	-1.12	-1.14	-1.14	-0.83	0.03	-1.1	-0.74	-0.16	-1.11	-1.09	-0.51	0.44	-0.68	-1.26	-0.88	-0.57
C12orf4	-0.84	-1.28	-0.14	0.26	-1.96	-1.72	-1.71	-1.53	-0.72	-0.55	-0.21	0.25	-0.4	0.91	0.8	-0.41	1.76	1.71	0.32	0.94	0.79	0.26	0.83	0.85	2.1	2.05	1.2	0.36	-0.49	-0.49	0.05
C16orf96	-2.29	-1.97	-2.33	-1.25	-1.96	-0.68	-1.36	-0.94	-1.74	-0.94	1.37	0.72	1.37	-1.34	-0.01	-0.59	-0.68	-0.61	-0.63	0.42	-0.45	0.28	0.13	0.24	-0.98	0.74	0.23	-0.55	-0.89	-0.61	-1.57
C6orf10	-1.34	0.11	-0.92	-0.96	-1.96	-0.71	-1.66	-0.7	-1.15	-0.86	-1.24	-0.08	0.57	0.46	-0.39	1.3	-0.81	-1.08	-0.25	0.71	-1.08	-1.42	0.84	1	0.87	0.19	1.32	-0.05	-0.25	0.94	-0.36
KRTAP3-1	-0.84	-0.46	-1.51	-1.92	-1.96	1.68	-0.15	0.61	1.5	-0.49	0.69	0.77	-0.36	0.39	-0.3	-0.6	-1.35	-0.73	-0.84	-1.25	-0.46	1.25	0.48	0.07	-0.48	0.39	0.41	-1.57	-0.72	-0.16	-0.32
LRRC34	-0.36	0.19	-0.1	-1.22	-1.96	0.14	0.36	0.79	0.73	0.76	-2.1	-1.96	0.8	0.65	0.75	0.8	-0.51	0.42	-0.02	0.18	-0.61	1.07	0.71	0.7	-0.38	-0.02	0.02	0.23	-0.13	-0.37	-0.08
R3HDM2	-1.78	0.11	-1.27	-2.31	-1.96	-1.92	-1.05	-0.01	-0.56	-0.94	0.72	-0.55	0.55	0.72	-0.5	0.63	0.29	0.26	0.65	-0.59	-0.18	-0.64	0.85	1.11	-0.6	0.35	0.57	0.36	-0.17	-0.38	0.13
RBP4	-2.04	-0.63	-2.05	-1.39	-1.96	0.17	1.06	0.7	0.18	0.62	0.53	1.62	-0.51	0.53	0.61	-0.22	0.27	0.05	-0.41	-0.28	0.01	-0.67	-0.2	0.15	-0.03	-0.96	0.6	-0.18	0.44	0.09	0.05
RRM1	-2.22	-0.46	-2.65	-3.15	-1.96	-1.42	-0.53	-0.26	-2.46	-0.9	0.1	1.25	-3.76	-0.73	0.55	-1.7	1.26	1.47	0.52	1.63	0.57	-2.28	-1.61	-3.1	-1.57	-1.97	-0.82	0.11	-1.95	-2.31	0.47
TIMM17B	-1.94	-0.41	-2.05	-2.08	-1.96	-0.66	0.83	2.44	0.87	-0.1	0.78	-0.79	-0.55	-0.59	1.19	0.86	0.83	-0.47	-0.82	-0.72	-0.05	0.69	0.41	-0.06	1.02	0.04	0.73	0.22	0.9	0.52	0.91
TRPM4	-1.68	0.28	-0.97	-1.89	-1.96	0.08	-0.38	-1.3	0	-0.8	-0.8	-1.16	0.92	0.78	0.98	0.05	-2.3	-0.17	-0.61	0.66	-0.26	1.34	0.34	-0.04	-0.29	1.25	-0.91	-0.91	0.05	-0.19	0.28
ANKHD1-EIF4EBP3	1	-0.85	-0.53	-0.33	-1.95	-0.53	-1.27	-1.12	-0.34	-0.78	-1.08	-0.83	-1.34	-0.08	0.29	-0.22	-1.03	-1.05	-0.38	0.14	-0.42	-0.95	0.57	0.44	-0.19	-0.18	-0.69	1.15	0.38	-0.39	0.13
FAM9B	-0.07	0.12	-0.47	0.03	-1.95	0.52	-0.96	-0.2	0.24	0.53	-0.57	0.18	0.61	-0.45	0.76	-0.13	0.76	0.54	-0.26	0.15	0.72	0.14	-0.72	-0.72	-0.92	-1.01	-1.29	-0.04	-0.55	1.33	1.06
KCNS1	-2.5	-1.57	-1.38	-1.57	-1.95	0.66	0.88	1.11	0.23	1.16	-0.33	0.73	-0.83	-0.1	-0.85	1	-0.19	0.9	0.06	0.27	0.06	-0.37	-0.71	-0.13	0.36	0.93	-1.12	0.38	-0.89	-2.22	-1.38
PALB2	-5.28	-4.49	-3.72	-0.26	-1.95	-0.64	-0.97	-3.42	-1.98	-2.14	-0.22	-6.03	-5.11	-4.78	-6.03	-0.13	-1.43	0.36	-0.92	-1.2	-0.19	0.11	-2.95	0.05	-2.7	-3.27	0.58	-5.08	0.52	0.33	1.04
RPL18	-2.12	-1.15	-1.68	-0.32	-1.95	-0.24	-0.03	-1.04	0.23	-1.66	-1.38	-0.82	0.68	-1.12	0.27	0.79	0.12	1.36	3.26	1.95	1.8	-0.94	-0.61	0.54	-1.26	-0.54	0.09	1.45	-0.88	-1.32	-0.18
SEMA3F	-0.88	-1.87	-0.69	-0.51	-1.95	0.5	0.38	-0.22	0.59	0.48	1.88	2.62	-0.94	0.02	1.04	0.21	-0.15	-1.04	-0.56	-0.25	-0.34	-1.01	1.09	1.13	1.07	0.6	0.66	-0.54	0.21	0.43	0.78
STK39	-1.29	-0.85	-0.28	-0.14	-1.95	0.07	0.03	-0.76	-0.06	-0.69	-0.44	0.52	-0.86	-0.16	0.45	-1.09	-0.06	0.44	-0.43	-0.33	-0.34	0.5	-0.4	-0.21	0.4	0.03	-0.53	-0.41	0.15	-0.8	0.05
TNFRSF10A	-0.9	-1.63	-0.54	-0.13	-1.95	-0.29	-0.92	-0.36	0.24	-0.81	-1.33	-0.63	0.88	-0.15	-0.88	-1.42	0.08	0.61	-0.53	0.72	0.84	-0.74	-0.33	0.17	0.47	0.35	0.3	-0.66	0.93	-0.62	-0.12
TRAIP	-6.9	-5.87	-5.74	-1.33	-1.95	-3.92	-1.78	-1.14	-3.14	-4.87	-1.14	-4.61	-0.92	-6.82	-3.8	-0.17	-1.45	0.35	2.06	1.69	0.98	1.04	-3.19	-3.69	1.07	-4.22	0.26	-4.13	-2.84	-1.45	-1.14
ATP6V0E2	-1.98	-0.89	-0.38	-0.95	-1.94	0.67	0.8	-1.25	0.91	-0.5	0.34	-0.63	-0.07	-1.34	-0.32	2.04	0.08	1.23	-0.88	0.38	-0.1	1.26	-0.18	-0.36	-1.96	0.02	-0.82	-0.12	0.67	0.09	0.45
C17orf96	0.65	-0.41	-1.08	-0.01	-1.94	0.49	0	-0.61	0.45	0.37	-2.01	-0.27	0.02	-0.39	0.28	0.73	-1.61	-1.79	-1	1.21	0.19	-1.77	-0.43	0.07	0.1	-0.3	-0.48	-0.57	0.18	0.73	0.31
HERC3	-0.25	-1.33	-0.41	-0.6	-1.94	-0.45	0.2	0.38	0.19	-1.29	-0.53	-0.72	1.22	0.62	-0.65	-0.65	0.38	0.29	0.21	-0.21	0.3	0.38	1.27	0.81	0.49	1.14	-0.44	-1.82	-0.63	-0.55	-0.03
KIAA0087	-0.56	-1.06	-0.95	-1.02	-1.94	0.59	-0.17	-0.72	0.06	-0.92	-2.34	-1.35	0.79	0.12	0.67	-0.46	-2.57	-1.21	-0.86	-0.51	-0.25	-0.08	0.02	-0.04	-1.02	-0.78	-1.91	0.89	0.03	-0.16	-0.27
SERBP1	-1.1	-0.58	-2.23	-2.53	-1.94	-1.42	-3.63	-1	-1.76	-0.21	1.42	1.38	-2.14	-0.76	-0.49	-1.17	-1.2	-1.24	-0.23	0.5	-0.2	-0.89	0.07	-1.38	1.45	0.14	4.04	2.52	0.94	-0.66	-0.92
WISP2	0.35	-0.77	-1.73	-0.57	-1.94	1.26	0.68	1.07	0.72	0.26	-0.87	-0.37	0.2	-0.37	0.51	-0.57	0.61	0.23	0.08	0.78	0.31	0.03	-0.97	-0.17	-0.21	-0.56	-0.78	-0.91	-0.07	0.61	1.14
C2CD4A	-1.26	0.27	-0.94	-0.67	-1.93	-0.1	1.85	0.51	-0.35	0.63	-0.71	0.82	0.58	0.09	-0.22	-0.13	0.59	1.6	-0.88	-1.09	-0.27	1.18	-1.24	-0.61	-1.57	-1.72	0.21	-0.38	-0.1	-0.46	-1.57
CTDSPL2	-0.1	-2.97	-4.61	0.01	-1.93	-3.67	-0.08	-1.84	-1.47	1.85	-0.93	-1.56	-0.1	-0.82	-2.5	-3.29	-0.07	2.51	0.54	0.09	-1.17	-0.75	-2.26	-4.13	-5.17	-3.81	-6.7	-4.22	-0.31	0.93	-2.43
ENDOD1	-1.03	-0.54	-1.61	-0.84	-1.93	0.41	-1.07	0.88	0.03	0.21	-0.57	0.17	0.53	0.12	0.78	-0.18	0.78	0.83	0.13	0.12	-0.26	-1.24	-1.27	-0.43	1.43	0.44	0.54	0.6	0.98	1.42	0.26
EXOC5	-0.16	1.11	-0.03	-0.15	-1.93	-1.39	-0.49	-0.05	0.8	-1.56	1.28	-0.3	1.1	-0.2	-0.88	0.32	0.14	0.8	1.7	1.58	1.86	0.61	0.28	0.55	0.47	0.03	0.44	0.93	-0.95	-0.69	-1.98
FLYWCH1	-1.45	-1.04	-0.45	0.76	-1.93	-0.58	-0.61	-0.32	-0.25	-0.21	0.02	0.73	-0.56	0.83	-0.58	0.27	-1.62	-0.96	-0.23	-0.34	0.98	-1.45	0.12	0.96	-0.16	-0.55	0.24	0.33	1.01	0.31	-1.48
GRB7	-1.12	-0.55	-1.46	-0.69	-1.93	0.77	0.71	1.07	-0.02	-0.01	-0.74	-0.48	-0.93	-0.72	-0.5	-0.15	-0.25	-0.39	0.28	-0.76	-0.75	0.88	-0.35	0.14	0.01	0.16	0.04	1.52	-0.68	-0.26	-0.56
GTSE1	-0.84	-0.66	-0.51	-0.2	-1.93	0.31	0.09	0.61	0.67	-0.32	-1.46	-1.32	0.31	1.23	-1.53	0.2	-0.56	-1.72	0.5	0.44	0.95	-0.72	-0.01	-0.12	-0.24	-0.59	-1.86	0.79	-1.24	-0.97	-1.88
HSD17B14	-0.93	-2.01	-0.93	-0.96	-1.93	-0.99	-0.58	-1.18	-0.71	-0.15	-0.84	1.43	0.41	0.73	0.73	-0.13	-0.46	0.2	-1.04	0.22	0.3	-1.4	-0.35	0.49	0.21	1.24	0.46	-0.08	0.34	-0.96	-0.91
LIPF	0.18	-1.18	-1.4	-1.22	-1.93	0.4	-1.59	-0.29	-0.35	0.05	-1.02	-1.94	1.44	0.03	0.14	0.77	-0.23	-1.05	-0.34	-0.48	-0.13	-1.15	-0.49	-0.01	-0.81	-0.16	-0.29	-0.71	0.43	-0.16	-0.69
PAFAH1B3	1.56	-1.04	2.01	2.47	-1.93	2.64	1.16	0.57	1.49	0.56	-0.32	0.46	0.89	-0.93	0.87	0.61	-0.46	-0.24	-0.69	-1.09	-0.56	1.19	-0.54	0.92	-0.77	0.91	-0.26	0.93	-0.6	0.07	-2.32
PIGM	0.32	-0.91	-1.13	-0.32	-1.93	0.19	-0.33	-0.88	-0.93	-1.63	-1.3	0.5	-0.91	0.46	0.23	2.34	1.2	1.73	0.91	0.96	0.72	-1.16	-2.69	1.41	-1.12	-1.09	-1.55	-0.76	-0.33	-1.15	-2.12
TAAR6	-0.54	-1.15	-1.66	-0.86	-1.93	-0.06	0.22	0.62	-0.05	1.15	-0.07	-2.13	-1.83	0.67	0.12	0.18	-0.53	-0.89	0.13	0.49	0.81	-0.65	-0.55	0.18	0.06	0.03	-1.32	0.06	0.1	0.09	0.29
THUMPD2	-0.61	-0.66	-0.23	-0.68	-1.93	-1.27	-0.46	-0.18	-1.34	0.2	0.95	0.53	-0.01	0.72	0.34	-2	-3.46	-2.63	-1.38	-0.23	0.02	0.04	-0.31	-1.47	-0.22	-1.73	-2.5	-0.69	0.35	1.09	0.97
TINAGL1	-0.61	-0.51	-0.09	-1.12	-1.93	-0.04	1.08	0.14	0.17	1.09	-1.26	0.54	0.45	0.95	0.75	-0.8	0.08	0.37	-0.6	0.21	-0.19	1.21	0.45	0.42	-0.61	0.23	0.57	0.08	-0.22	0.82	-1.09
ZNF692	-1.75	-1.92	-2.32	-1.56	-1.93	0.44	0.66	1.17	-0.02	-0.02	1.7	1.24	-0.58	-0.27	0.92	0.43	0.73	1.83	-0.13	0.79	-0.5	-0.86	-0.52	0.03	0.72	0.75	0.28	0.66	1.14	1.19	0.43
BCAT1	-0.81	-1.5	-0.84	-1.27	-1.92	0.62	0.37	1.08	-0.4	0.29	-0.31	-1.96	-0.39	0.01	-1.57	-0.01	-1.67	-0.94	0.18	-1.5	-1.6	0.08	0.79	0.56	0.16	-0.15	-0.12	0.44	-0.93	-1.2	0.29
COMTD1	-0.64	0.77	0.46	0.09	-1.92	0.27	0.55	-0.84	-0.94	0.28	-0.09	-0.18	0.82	0.88	0.5	1.09	0.84	1.44	0.11	0.75	0.8	-0.76	0.59	1.45	0.8	0.06	0.93	-1.1	1.13	1.22	2.03
G2E3	-1.29	-2.19	-0.89	-1.45	-1.92	0.09	-0.63	0.21	-0.52	-0.16	0.85	-0.34	-0.94	-0.65	-0.85	-1.51	0.77	0.77	1.21	1.78	0.66	0.33	-0.5	-1.22	-0.82	-0.32	-0.01	0.06	-0.04	-0.34	0.46
GNB2	-1.69	0.02	-1.86	-0.86	-1.92	0.5	0.94	0.49	-0.18	1.47	0.77	0.53	-0.02	-0.55	0.41	-0.7	0.41	-1.73	0.34	0.17	-0.57	-0.26	-0.53	-1.67	-0.48	0.28	-0.35	0.67	-0.19	1.65	-1.01
OR6C6	-1.78	-1.88	-1.5	-1.73	-1.92	0.01	-0.63	0.82	0.07	0.7	0.6	0.67	-0.56	-1.23	0.08	-0.32	-0.77	0.71	-0.12	-0.53	-0.8	-0.13	-0.16	-0.12	-0.56	-0.17	-0.7	0.98	0.16	-0.61	0.11
RRS1	-1.83	-0.35	-2.73	-1.43	-1.92	0.01	1.25	-0.57	-0.26	-0.51	0.65	1.65	1.12	0.84	0.03	-1.57	-1.62	-0.12	2.25	2.68	3	0.62	-0.19	-0.44	-0.93	-0.59	-0.12	-1.06	-0.58	0.15	-1.18
AGBL1	-0.93	-1.15	-1.05	-1.81	-1.91	1.52	0.22	-0.21	-0.1	-0.38	-0.76	-1.83	1.92	-0.27	-1.1	-0.59	0.93	0.66	0.02	-0.53	-0.58	0.8	1.3	0.67	0.17	-0.04	0.37	-0.37	-0.59	0.75	1.06
ATP5B	-0.77	0.03	0.09	0.61	-1.91	0.05	-0.63	-0.12	-0.15	0.53	-0.21	0.43	-1.23	0.51	-0.35	-0.37	0.98	1.01	1.62	-0.29	-0.95	-0.69	0.1	-1.86	1.35	-1.07	2.07	1.73	-0.68	0.52	-0.71
BACH1	-1.26	-1.1	-0.8	-1.48	-1.91	0.83	0.19	0.47	-0.52	1.34	-0.83	-1.36	1.12	-1.38	0.62	0.73	-0.45	-0.67	0.32	-1.35	-1.19	1.39	-0.44	0.8	-1.86	-2.44	0.11	-0.48	1.41	2.3	-0.19
DUOX2	0.68	0.93	0.23	-0.2	-1.91	-1.05	-0.9	-0.37	0.23	-1.07	-0.54	-0.39	-0.41	-0.3	0.1	-1.34	-0.51	-0.64	0.18	-0.25	-0.77	1.1	-0.42	0.07	-0.74	-1.27	-1.41	0.73	0.1	0.83	-0.03
GGA3	-1.41	-1.02	-1.72	-0.54	-1.91	0.46	0.24	0.16	-0.76	0.94	-0.2	-0.03	0.87	0.37	-1.18	-0.22	-1.3	-1.34	-0.6	0.26	0.81	-1.61	0.45	0.11	0.27	0.47	-1	-1.7	1.24	-0.23	0.25
HTT	0.3	-0.22	-0.48	0.45	-1.91	-1.59	1.42	-0.28	-1.33	-2.09	-0.38	-0.32	0.33	0.86	0.35	-0.53	0.33	0.74	-1.21	-0.47	-2.27	1.68	-1.91	-0.96	0.78	0.47	1.09	-0.44	0.79	0.34	0.2
OR1K1	0.59	-1.97	0.04	0.53	-1.91	-0.31	0.72	-0.01	0.01	0.07	0.51	-1.16	0.3	-0.04	0.05	1.13	0.28	0.02	0.25	0.49	0.23	0.06	0.24	0.58	1.33	0.9	0.89	-0.28	0.15	0.42	0.53
PFKFB1	-2.25	-0.72	-2.58	-2.11	-1.91	-0.65	-0.61	0.09	-0.9	-0.14	-0.06	-0.92	0.56	-0.52	0.03	0.58	-0.18	-1.36	-0.98	-1.04	-0.6	0.09	0.6	1.07	0.27	0.19	-0.61	-0.15	-0.63	0.69	1.04
PIP4K2C	-0.48	-1.47	0.47	-1.41	-1.91	-1.89	0.47	0.33	-0.48	-0.21	0.99	1.86	-0.94	-0.05	-0.62	0.3	-0.11	-0.06	0.42	0.67	0.98	0.64	0.45	1.78	0.14	0.7	0.45	-1.56	0.73	-1.15	0.2
UBA3	-2.06	-2.15	-2.14	-1.39	-1.91	0.61	1.78	-0.36	0.34	-0.71	-1.72	-2.7	-2.82	-9.1	-8.8	-3.66	1.31	0.69	-3.09	0.07	-0.05	-1.55	-6.26	-11.38	-10.05	-6.96	-9.74	-6.7	-5.24	-12.85	-4.55
WWC2	-0.33	-3.34	-1.49	-1.72	-1.91	1.5	-1.22	0.82	0.59	-0.11	-1.25	-0.52	1.32	-0.44	-0.99	-0.1	-1.38	-1.32	-1.32	-1.67	-1.69	-1.47	0.3	-0.87	0.01	-0.48	-0.58	0.3	0.24	0.37	0.65
DMRT2	0.13	0.55	-0.16	-0.21	-1.9	-0.05	0.34	0.17	0.95	0.84	-1.19	-0.34	-0.19	0.39	1.4	1.19	0.47	-0.8	-0.1	0.25	-0.2	-0.83	-0.33	0.56	-0.67	0.09	-0.14	-0.23	0.4	1.36	1.06
DYRK1A	0.7	-1.16	-0.95	0.99	-1.9	-2.84	-0.39	-2.75	-3.33	-0.73	-0.33	-3.1	2.25	-0.66	-1.92	1.65	-1.5	-1.2	-0.63	-2.22	1.05	0.83	-1.37	6.53	-1.58	0.99	3.43	-4.35	0.16	-0.55	0.23
ERCC1	-7.94	0.3	-1.61	-0.93	-1.9	-2.61	-1.32	-4.14	-3.4	-11.88	0.25	-0.26	1.99	-6.77	-5.96	-1.44	-4.17	0.75	-3.05	12.5	-0.13	-0.33	-9.67	-0.12	-3.66	-0.98	0.18	0.84	-4.92	-1.17	0.34
FOXN3	-1.88	-0.88	-1.49	-4.03	-1.9	-2.12	-0.04	0.3	-0.4	0.46	0.11	1.69	-0.27	-0.81	-0.05	0.72	-0.58	-0.23	-0.82	-1.46	-1.4	-0.72	-0.58	0.77	-0.27	-0.33	-0.1	-0.1	0.11	0.04	-0.78
PRDX6	0.04	-0.91	0.06	-1.49	-1.9	-1.12	-3.43	-0.22	-0.96	-0.74	-0.72	0.59	0.06	0.7	-0.12	-1.6	0.14	0.19	0.23	-0.1	-0.58	-0.56	0.05	0.41	0.05	0.21	0.74	0.72	1.83	0.13	0.85
SUN1	-0.9	-0.89	-1.02	-0.13	-1.9	0.39	1.33	0.65	1.07	0.05	-1.8	0.13	-0.24	1.71	0.07	-1.09	-0.15	0.21	-0.8	0.6	1.04	-0.49	0.71	0.61	1.07	0.23	-0.63	0.14	0.08	0.41	0
ABCA3	-0.15	0.48	-0.06	-1.11	-1.89	-1.13	-0.11	-1.08	-1.69	-1.09	-0.6	0.22	1.33	-0.23	-1.08	0.85	0.13	0.46	-0.4	0.18	0.54	-0.84	0.46	0.62	0.36	-0.08	0.3	0.94	-0.34	0.88	1.15
ALDH8A1	-0.82	-0.31	-0.26	0.26	-1.89	0.68	-1.67	0.08	-0.7	-0.35	-0.14	0.89	0.56	-0.52	-0.09	1.31	0.29	1.2	1.93	0.95	1.47	1	0.62	-0.01	0.6	0.45	1.54	0.16	0.41	-0.01	-0.31
DUOXA1	0.81	-0.54	0.23	1.58	-1.89	-0.8	1.08	-0.24	1.34	-0.97	-1.23	-0.64	-0.29	-0.76	-0.36	-0.87	-0.31	-0.85	-0.35	-0.36	-0.68	-0.24	-1.02	-0.3	-1.31	-0.74	-0.26	-2.43	-0.72	-0.49	-0.94
IPO7	-0.69	0.05	-0.87	-0.2	-1.89	-1.47	-1.12	-1.33	-2.03	-0.22	-0.62	-0.36	-0.94	0.16	0.65	-1.2	0.38	0.51	4.03	2.19	2.72	1.16	0.36	2.26	0.16	1.69	2.17	1.16	0.41	0.4	2.35
MRPL20	-0.69	0.27	-1.42	-0.28	-1.89	0.1	-0.65	-0.41	-0.74	0.21	0.71	1.85	0.6	0.69	-0.19	0.21	0.52	-1.16	0.6	1.05	0.6	0.36	0.4	-0.26	1.26	0.52	1.54	0.25	0.49	1.91	0.11
PQBP1	-0.67	-0.63	-0.67	-0.98	-1.89	0.9	-0.59	-0.1	0.4	0.17	-2.15	-0.79	-2.98	-0.54	-0.65	-0.24	0.8	-0.85	-0.18	0.37	0.16	0.89	-1.74	-0.12	-0.68	-0.88	-1.06	-0.46	-0.97	-0.47	-1.66
SIGLEC11	0.44	0.78	0.42	1.18	-1.89	0.75	-0.16	0.4	-1.09	-0.8	2.29	2.25	-0.62	0.53	1.11	-0.91	0.53	0.61	-1.02	-0.29	-0.4	-1.62	0.09	0.51	-0.17	1.14	0.58	1.17	2.14	0.82	1.74
ZNF534	-1.61	-0.34	-1.78	-1.47	-1.89	0.52	0.59	-0.07	-0.36	1.15	0.82	-0.06	-0.33	0.18	-0.16	1.69	-1.31	-0.41	-0.42	-1.73	-1.92	0.8	0.33	0.34	-0.63	0.81	0.29	0.65	-0.31	-0.37	-1.19
ATP5SL	-1.13	-0.09	-0.85	-1.55	-1.88	0.81	0.83	0.83	0.37	0.97	-0.02	-1.82	1.05	0.07	1.14	-0.15	-0.09	-1.22	-0.66	0.12	0.25	0.51	-0.02	0.09	0.52	1.01	0.05	0.43	1.46	1.78	-0.33
HAUS1	-0.95	-0.94	-2.25	-1.3	-1.88	-1.49	0.46	-1	-1.23	0.11	-1.18	-0.09	0.59	0.86	-1.48	-1.19	1.78	1.25	2.06	1.61	1.6	0.17	-0.76	-2.52	-0.47	-1.14	-2.25	-0.95	-0.42	-0.4	-0.51
KIAA1737	-0.21	-0.38	-1.58	-2.21	-1.88	-0.55	0.37	-0.07	-0.34	0.68	0.8	-1.29	-0.13	0.09	0.22	0.3	-0.29	0.77	0.11	0.27	0.62	0.27	0.34	0.19	0.06	-0.2	-0.28	-1.35	-0.33	1.36	0.64
KLHL7	-1.53	-0.81	-1.29	-0.08	-1.88	-0.07	0.04	-0.35	-0.14	1	-0.67	0.01	0.56	0.25	-0.5	0.94	-0.25	-1.45	-0.1	-0.33	-1.03	0.6	-0.93	-0.49	-1.59	-1.5	-1.1	-1.25	1.01	0.6	0.55
LTBP3	0.36	-0.77	-0.21	-0.57	-1.88	0.6	1.31	1.01	0.48	0.88	-1.75	-0.49	0.42	1.13	1.32	0.55	-0.86	0.2	-0.58	0.27	0.33	0.16	-0.08	-0.27	0.42	0.65	-0.27	0.38	-0.94	-0.4	0.08
MEIS2	-0.93	0.23	-1.6	0.36	-1.88	0.54	0.54	0.59	1.53	0.6	-0.16	-0.46	0.15	-0.12	-0.4	-1.41	0.53	1.32	-0.13	0	0.37	0.22	-1.69	-1.07	-1.63	-1.57	-1.25	-0.47	-0.39	1.34	0.5
PLEKHM1	-2.27	-0.86	-1.93	-2.36	-1.88	0.7	0.94	0.25	0.31	-0.12	-0.06	0.35	0.75	0.94	-1.54	-0.97	1.3	-1.55	0.01	0.75	0.96	1.21	-0.62	-0.67	-0.05	-0.23	-0.67	-1.03	-0.82	0.16	0.23
STARD3	-1.77	-0.59	-1.26	-2.95	-1.88	-1.12	-0.91	-2.19	1.21	-0.63	1.06	1.5	0.24	-0.73	1.06	1.08	0.72	-2.67	-0.34	0.09	0.61	0.64	-0.45	-0.67	0.27	0.42	-0.13	0.08	-0.48	-1.31	-0.56
STAU2	-0.54	-0.5	-0.21	-0.44	-1.88	-0.38	0.51	-0.05	-0.83	-0.48	0.11	-0.99	0.62	0.15	0.16	0.2	1.36	0.65	1.06	0.67	1	0.17	0.7	-0.79	-0.34	0.28	0.87	1.82	0.31	0.54	-0.45
SYVN1	-1.4	0.2	-0.88	-0.8	-1.88	-0.09	0.6	-0.34	2.5	-1.14	-1.39	-0.99	1.42	0.58	0.33	-0.06	0.08	0.84	0.93	-0.01	-0.18	-0.47	1.66	0.99	-0.93	0.19	-0.14	1.8	-0.8	1.86	2.11
TFEB	-0.11	-0.04	-0.02	-0.37	-1.88	-1.6	-0.64	-0.72	-1.59	-1.9	1.41	0.94	1.21	-0.71	0.51	-0.4	-0.08	-1.13	-1.2	0.44	0.17	-1.61	0.01	-0.37	0.24	-0.1	-0.63	1.41	1.99	1.68	1.24
UTP11L	-0.36	-1.63	0.25	0.92	-1.88	1.08	-0.05	0.56	-0.04	1.36	-0.69	0.79	1.05	-0.54	-0.2	-0.44	0.54	1.3	2.44	3.32	3.83	-0.82	0.39	-0.59	0.81	0.68	0.86	0.29	-1.37	0.2	-1.03
UTP18	-0.72	-0.38	0.08	0.16	-1.88	1.33	0.86	0.46	0.46	0.86	-1.28	-0.55	0.65	0.36	-0.78	-1.21	-2.62	0.43	3.06	2.28	2.97	-0.46	-0.37	0.34	-1.01	0.14	-0.83	0.52	-1.4	0.94	0.23
ZNF410	-2.01	-0.93	-1.85	-1.71	-1.88	-0.83	-1.11	-0.78	-0.71	-0.67	-2.31	-3.08	0.18	-0.4	0.48	-0.3	-1.51	0.96	0.64	-0.38	-0.19	0.46	-0.51	2.02	-1.36	0.41	-0.71	-0.38	0.69	-0.83	1.75
ADA	-0.5	-0.28	0.5	-0.29	-1.87	0.25	0.95	-0.21	-0.29	0.17	-0.15	-0.52	-0.5	-0.71	-0.05	-0.09	0.66	0.43	-0.77	-1.21	-1.38	-0.02	-1.18	-0.81	-0.43	-0.65	-0.9	0.43	-0.34	-0.03	-3.06
ATP2B1	-1.52	-2.11	-1.44	-2.32	-1.87	-1.17	-0.97	-0.9	-0.63	-1.16	-1.3	-0.02	0.38	-1.18	-0.92	0.06	-0.04	-2.13	-0.28	-1.31	-0.53	0.91	1.57	-1.47	-0.46	-0.84	-0.67	1.66	-1.83	0.83	-0.17
CCDC134	-0.74	-0.5	-0.76	-1.23	-1.87	-0.2	-0.8	0.14	-0.05	-0.74	0.5	-0.51	0.33	0.41	-0.12	0	-0.31	-0.72	0.58	-0.23	-0.2	0.61	1.86	0.24	0.84	1.37	-0.32	0.85	1.23	1.6	0.64
CCDC36	-0.52	-0.93	-0.66	-0.63	-1.87	-0.21	-1.47	0.7	-0.63	-0.14	-3.05	-1.34	0.12	0.99	0.52	0.58	0.32	-0.33	0.86	0.63	0.58	0.83	-1.3	0.45	-1	-0.62	-0.51	0.07	-1.55	-1.67	-1.24
FCER1G	-0.34	-0.68	0.26	0.91	-1.87	0.13	-0.15	-0.34	-0.02	1.05	-0.3	0.4	-0.7	-0.6	-0.21	-1.21	-0.67	0.08	1.14	0.62	0.69	0.27	0.15	1.09	0.82	0.6	0.23	-0.79	-1.07	0.14	-0.98
IL1RAPL1	-0.82	-1.59	-1.39	-0.36	-1.87	-1.14	-0.29	-0.36	-0.92	-0.25	0.01	-0.67	-0.08	-0.41	0.14	0.69	0.86	1.92	0.51	-0.29	0.65	-0.83	-0.9	0.1	0.26	-0.1	-0.01	0.78	0.07	0.43	1.47
MMADHC	-0.34	-1.12	-1.93	-1.89	-1.87	-1.65	-1.15	-1.64	-1.71	-0.74	-0.3	-1.23	-0.94	-0.53	-0.44	-0.97	-1.04	-0.95	-0.89	-1.32	-1.59	-0.16	0.2	-0.02	0.06	-0.21	-0.79	0.37	-0.34	1.09	1.4
PDE6C	-2.29	-1.54	-1.63	-1.36	-1.87	0.29	-0.25	-0.54	-1.83	-0.18	0.97	0.73	-0.77	-0.49	0.2	-1.93	-0.78	-0.16	-1.08	-1.3	-1.06	0.49	-0.44	0.67	-1.16	-1.06	-0.57	0.97	1.31	1.37	0.08
POLE3	-2.56	-6.63	-3.72	-1.07	-1.87	-1.42	0.54	-0.93	-2.49	-1.17	-1.09	0.24	-14.53	-1.3	-2.82	0.38	-1.1	0.21	-0.25	-0.98	-1.7	-0.21	0	-6.64	-0.94	-7.39	1.39	-8.87	-1.37	-4.57	-3.13
PTPRM	0.09	0.25	-0.4	0.18	-1.87	0	-0.84	-0.6	-0.56	-0.35	0.69	0.54	-0.38	1.5	0.17	0.95	-1.33	-0.37	-0.12	0.09	0.31	-1.63	0.14	-0.28	0.66	0.58	0.58	0.64	0.68	0.49	-0.37
STC2	-2.04	-1.04	0.24	-0.96	-1.87	0.77	1.47	2.09	1.6	1.4	0.23	-1.37	-0.63	1.16	-0.36	0.8	0.4	0.84	-0.15	-0.06	0.21	2.61	1.09	-0.55	0.16	0.04	0.35	-0.13	0.63	1.14	1.12
BAAT	-0.43	-2.19	-0.79	-1.61	-1.86	-1.22	-0.4	-0.18	-1.25	0.11	-1.09	-0.68	-0.08	0.87	0.29	-0.31	0.04	0.24	0.34	-0.56	-0.42	-0.51	1.39	0.41	0.59	-0.1	0.61	1.32	-1.29	-0.28	-0.54
GALP	0.23	0.02	0.72	0.3	-1.86	0.15	0.61	-0.65	-0.57	0.33	-0.41	-1.49	0.88	-1.07	-1.08	0.15	0.59	0.93	-0.24	-0.4	-0.33	0.94	-0.34	-0.57	-1.06	0.36	-1.22	1.46	0.51	-1.3	-0.26
LIG3	-0.15	-0.94	0.07	0.39	-1.86	-0.43	-0.94	-1.54	-0.61	-1.47	-0.89	0.43	0.94	-1.25	-0.02	-0.17	-0.26	-1.34	0.2	-0.61	-0.05	-1.04	-1.26	-1.17	-0.76	-1.16	-0.71	-1.78	-0.99	0.11	0.35
ORC6	0.32	-0.96	1.42	1.42	-1.86	0	1.46	-1.36	0.51	-1.03	-3.1	-2.91	-2.22	-1.46	-1.82	-0.08	-1.32	0.51	0.3	0.37	-0.18	-0.24	-1.39	-0.46	-3.57	-2.02	-0.66	-3.34	-1.46	-1.36	-0.28
SPATA6	0.04	-1.01	-1.31	-0.48	-1.86	0.31	-0.02	0.66	0.7	0.08	1.76	2.19	-1.03	0.19	0.1	-1.22	0.02	-0.19	-0.92	-0.26	-0.97	-1.63	0.53	0.21	0.77	0.98	1.6	1.1	-0.51	-0.52	0.61
SPRED1	-0.35	-0.76	0.45	-0.68	-1.86	-1.22	-0.6	-1.8	-0.34	-1	0.11	0.62	0.95	-0.34	-0.82	-0.71	0	-1.13	0.09	-1.02	-1.51	-0.15	-0.48	-0.15	-1.79	-1.05	0.84	-0.55	0.97	0.46	1.16
SRSF12	-0.38	-0.7	-0.74	-2.02	-1.86	-0.76	-0.2	-0.43	-0.44	0.27	0.42	-0.02	-0.04	1.27	-0.56	0.01	1.13	0.22	0.35	0.03	0.33	-0.21	0.09	0.78	0.33	0.75	0.81	-0.28	-1.77	-3.2	-1.09
THOC2	-1.11	-0.64	-0.06	-0.67	-1.86	0.5	2.2	1.12	0.23	0.8	0.37	2.38	-0.12	0.67	1.05	0.34	-0.15	2.11	0.28	0.35	-0.4	-0.9	-0.1	-1.46	0.25	-0.46	0.34	-0.73	0.59	0.22	-1.04
DZANK1	-1.3	-1.09	-0.64	-0.55	-1.85	-0.52	-0.04	-1.13	-1	-1.13	0.22	0.28	1.56	1.93	0.61	0.76	0.56	0.42	0.52	-0.17	0.58	-0.1	-0.97	-0.58	-1.76	-0.57	-0.61	0.15	-0.27	0.34	-0.65
FUT1	-3.45	-1.5	-1.58	-2.18	-1.85	0.52	1.43	0.67	1.32	-0.02	0.07	0.61	0.98	0.52	0.68	1.28	0.33	0.88	-0.76	-0.04	0.49	-0.48	-1.74	-0.38	-0.96	-0.25	-1.48	0.36	2.21	0.29	2.06
HBQ1	-1.76	-1.31	-0.87	-2.42	-1.85	0.93	-0.16	-0.43	-0.11	1.04	-0.18	0.57	-1.4	0.28	0.84	1.46	0.02	-1.03	-0.3	-0.12	0.17	0.1	0.46	-0.02	-0.18	0.54	0.54	-0.47	0.04	-0.6	0.94
INO80C	-1.04	-1.11	-0.65	0.16	-1.85	-0.99	-0.39	-1.25	-2.05	-0.59	-0.14	1.76	0.04	-1.04	-1.98	-1.56	-0.68	-1.08	0.27	-0.06	-0.93	0.6	-0.32	-1.98	-1.76	-1.32	-0.72	-0.71	0.22	0.75	1.03
KCMF1	-0.2	-1.98	-0.89	-1.17	-1.85	-0.5	-0.12	-0.51	-0.68	-0.07	-1.21	0.11	1.42	0.29	-0.77	0.63	-0.11	-0.5	0.26	-0.3	-1.09	-0.78	-1.87	0.29	-2.57	-1.28	-1.3	-2.06	-1.28	-0.37	-1.71
LYAR	0.93	-0.84	1.01	0.52	-1.85	-1.12	0.22	0.37	-1.09	-0.8	-0.07	0.03	0.73	0.31	0.41	-0.38	0.41	-0.48	0.37	-0.82	-0.6	0.65	-0.07	0.63	-0.43	0.98	0.95	1.2	-0.21	-0.15	1.38
MAGEE2	-1.3	-0.63	-2.03	-1.75	-1.85	-0.28	-0.18	-0.29	-0.18	-0.14	-0.62	-0.81	-1.08	-0.95	0.36	-0.26	1.55	0.35	-0.8	-0.21	-0.21	0.74	0.74	-0.31	0.57	0.44	-1.06	-0.77	0.01	1.43	-0.63
NR2C2	-0.75	-1.75	-1.98	-2.62	-1.85	-1.17	-1.85	-0.56	0.26	-2.96	-0.92	-0.74	-0.47	0.68	-1.98	0.03	-0.27	0.23	-1.4	-1.21	-1.07	-2.13	-1.55	-2.13	0.23	-1.95	-1.1	-1.51	0.1	0.47	0.86
PTP4A1	0.31	-0.54	0.63	-0.22	-1.85	1.07	0.54	-0.86	1.05	-0.04	-0.28	-0.17	1.39	1.22	-0.82	-0.65	0.5	-0.15	1.47	0.54	0.45	0.37	0.07	1.58	0.46	0.96	0.24	-0.24	0.21	1.26	0.68
RBM47	0.88	0	0.8	0.74	-1.85	0.85	-0.68	-0.16	-1.13	-1.37	-1.19	-2.15	0.7	-0.65	-0.32	0.32	-1.4	-0.01	-0.2	0.17	0.17	-0.22	-2.66	-1.54	-1.27	-2.22	-2.32	0.43	-0.03	-1.81	-0.74
SHD	-0.82	-0.69	-0.67	-1.27	-1.85	-0.3	-0.02	-1.36	-0.39	-0.81	0.11	-0.21	0.2	-0.08	0.35	0.59	0.74	-0.66	-0.12	-0.24	-0.47	1.18	-0.96	0.69	-0.57	-0.69	0.89	-0.32	-0.39	-1.1	-1.01
SKP1	-1.35	0.03	-0.8	-0.48	-1.85	1.54	0.32	-0.31	0.58	-0.66	0.44	NA	0.69	0.29	-1.46	-1.04	0.01	0.48	2.45	3.27	3.24	1.46	-1.02	0.07	-0.72	-1.55	-2.06	0.55	0.25	-0.91	-0.03
SUMO1	-0.36	-0.89	-1.79	-0.56	-1.85	0.29	-0.35	0.03	-0.35	-0.45	NA	NA	NA	NA	NA	-0.62	NA	NA	NA	NA	NA	-2.73	0.46	-0.32	0.12	1.03	0.54	-0.51	-0.87	-0.75	-0.86
TFDP1	-1.67	0.51	0.4	-1.02	-1.85	2.74	1.16	1.69	3.29	0.13	1.09	0.91	2.3	-0.62	0.33	-1.61	1.36	1.14	2.1	1.75	-1.16	-0.51	1.52	-4.26	-0.98	-0.42	-1.55	1.04	1.09	1.67	1.58
ZBED6CL	-2.09	-1.16	-1.82	-1.03	-1.85	-0.35	0.93	0.41	-1.42	0.94	0.4	0.17	0.36	-0.3	-0.17	0.53	0	-0.48	-0.01	0.22	-0.26	0.76	0.27	-0.96	0.19	0.9	-0.56	-1.03	1.15	-0.47	-0.68
CCDC25	-1.12	-1.76	-1.69	-1.43	-1.84	-1.49	-1.63	-2.18	-1.3	-1.49	0.19	-0.23	0.3	0.19	-0.78	-1.2	1.57	0.03	-1.17	-1.02	-0.68	-0.62	-0.8	0.23	-0.46	-1.17	-0.8	0.65	0.1	-0.25	0.63
CCL20	0.13	-1.81	-0.47	-0.36	-1.84	-0.03	-0.01	0.08	0	-0.89	-0.69	0.14	-1.23	-0.49	-0.06	0.03	0.11	-0.13	-0.72	-0.45	0.36	-0.41	0.52	-0.13	0.93	0.56	-0.03	-0.41	0.16	-0.67	0.44
CISD2	-0.88	-0.93	-0.14	-0.32	-1.84	-0.08	-0.83	-0.49	-1.13	0.33	0.58	-0.11	0.74	-0.93	1.04	0.62	-1.3	-1.14	-1.16	-2.56	-2.91	-0.42	0.97	0.61	0.82	0.28	1.32	1.29	-1.02	-0.16	-0.01
CLCN5	-1.17	-0.14	0.43	-0.51	-1.84	-0.1	0.59	0.3	0.97	0.2	0.63	-1.01	-1.01	-0.25	0.64	0.87	0.1	0.14	-0.84	0.21	0.33	0.14	0.08	0.17	0.68	-0.34	0.03	0.47	-0.4	0.28	1.4
CLEC12A	-1.08	-0.73	-2.39	-0.9	-1.84	0.08	-0.04	0.7	0.68	1.03	-0.43	-0.15	0.66	0.7	-0.33	0.6	0.49	0.91	0.35	-0.46	-0.52	1.19	0.59	1.22	0.88	0.23	0.68	-0.32	0.26	0.17	0.46
GIP	-2.37	-0.89	-1.3	-2.06	-1.84	-0.24	0.12	-0.74	0.5	1.02	-1.9	-1.14	0.03	-0.08	0.47	-0.19	-0.92	-1.27	-0.1	-0.52	-0.24	0.73	0.16	0.66	0.05	0.01	0.22	0.39	-0.52	0.16	-0.25
ING3	-1.69	-0.05	-0.17	-1.23	-1.84	0.53	0.6	-0.76	0.03	-0.54	-1.09	-1.29	-0.24	-0.4	-0.35	-0.38	-0.79	-1.48	1.08	0.58	1.57	1	-0.24	1.07	-0.89	1.16	0.94	0.1	0.02	0.78	-0.29
KCNK9	-0.7	0.36	0.09	-0.13	-1.84	-0.71	0.82	-0.33	0.48	0.74	-2.21	-0.95	-0.16	0.74	0.18	-0.52	-0.29	-0.41	-0.13	-0.21	-0.73	2.1	-0.84	-0.4	-1.11	-1.25	0.59	0.34	-1.94	-1.19	-0.15
PLCG2	-2.07	-2.29	-1.58	-2.76	-1.84	-0.83	0.6	0.24	-0.79	-0.02	1.52	-0.39	-0.18	-0.88	0.77	-0.18	-0.16	0.07	0.11	-0.43	-0.25	1.45	-0.15	-0.28	-0.92	-1.37	-0.69	0.61	1.07	0.8	1.45
SLC24A1	-1.96	-1.67	-1.58	-1.26	-1.84	-1.44	-0.33	-1.49	0.04	-0.54	-0.62	-0.2	0.55	0.09	-0.17	-0.81	-1.1	-1.12	-0.97	-2.02	-2.39	0.34	0.24	-0.41	-0.52	-0.06	1.45	-1.36	0.16	0.83	1.27
SYT10	-2.11	-0.62	-1.15	-1.78	-1.84	0.15	1.25	-0.1	0.28	1.01	-1.12	-0.77	-0.39	-0.77	0.95	-0.09	0.15	0.34	1.09	-0.04	0.01	1.27	-2.1	-0.68	-0.05	0.2	-1.04	0.33	-1.12	-1.41	0.52
UCN	-0.57	-0.02	-0.81	-0.01	-1.84	1.16	0.88	0.48	0.78	-0.18	-0.24	0.63	-1	0.53	-0.58	-0.55	0.42	-0.04	-0.1	-0.41	-0.61	0.58	0.36	-0.42	1.04	0.58	-0.6	-0.31	0	-0.06	0.03
UTRN	0.17	-1.19	0.21	-0.98	-1.84	-0.89	-1.41	-1.19	-0.84	0.1	0.68	0.26	0.2	-0.07	-0.17	0.44	0.23	1.32	0.77	-0.32	-0.17	-0.86	1.93	0.84	-0.14	0.54	0.78	1.36	-0.14	-0.19	-0.1
ZNF197	-0.79	-2.05	-1.64	-2.51	-1.84	-0.21	-1.63	-0.99	-0.59	-0.76	-2.12	-0.76	0.54	0.94	-0.03	1.33	-0.28	-1.14	-0.33	-1.51	-1.11	-2.44	0.93	-0.2	0.08	1.69	0	0.18	-0.2	-0.57	-0.84
BOP1	-1.59	0.44	-0.57	-0.87	-1.83	-0.14	2	-0.66	-0.78	-0.27	-1.07	0.16	0.01	0.51	-0.08	1.74	0.55	0	3.08	2.2	2.48	-1.34	1.78	1.28	0.44	-0.01	1.73	-1.42	1.06	0.97	0.66
CYP4B1	0.59	0.05	0.73	1.4	-1.83	0.19	0.15	-0.13	-0.49	-0.72	-0.26	-0.36	1.29	0.36	0.37	-0.21	0.2	-0.95	0.53	-0.38	0.57	1.45	-0.38	-0.12	0.57	0.25	0.46	0.71	-0.7	-0.69	-1.28
GAS1	-1.87	-0.19	0.69	0.35	-1.83	0.41	1.26	1.8	0.67	1.1	0.55	1.41	0.62	0.2	0.29	1.25	-0.01	-0.22	-0.66	-0.15	-0.19	1.04	0.69	-0.29	0.83	0.73	0.85	0.26	0.55	0.38	1.19
GP1BB	0.04	-1.39	-0.17	0.74	-1.83	1.68	0.24	0.57	1.5	1.14	-1.13	-0.45	0.47	0.55	0.07	0.64	0.54	0.39	-0.5	0.31	-1.22	-0.1	0.1	-0.27	-0.15	0.2	1.08	-0.35	1.53	0.2	0.68
GRIN3B	-1.99	-1.39	-0.95	-0.52	-1.83	0.96	2.2	0.41	1.11	-0.43	1.11	1.02	2.16	0.9	-1.45	1.67	0.57	1.48	-0.1	0.97	0.27	1.84	0.3	0.52	1.49	0.71	1.73	-0.2	1.52	-1.02	-2.27
IKZF1	0.42	-1.09	0.61	-1.19	-1.83	-0.01	-0.29	0.62	-0.01	0.95	1.19	1.66	1.12	1.19	-0.46	0.47	-0.38	-1.43	0.13	0.69	0.11	0.46	1.2	-0.01	1.74	0.51	0.59	0.06	0.03	0.4	-0.76
MPP2	-1.75	1.04	-0.74	-1.46	-1.83	0.66	0.04	-0.79	0.36	-0.44	0.12	-0.11	0.21	0.87	-0.82	-1.57	1.68	0.23	-0.06	0.16	-0.22	0.1	0.85	0.17	-0.15	-0.45	0.33	-0.77	-0.71	-0.11	0.01
PAX6	-1.12	0.57	-0.29	-1.5	-1.83	2.13	-0.32	-0.16	-0.7	1.96	0.56	-0.21	-0.33	1.14	-0.4	0.53	-0.35	-0.76	0.28	0.73	-0.1	-0.56	0.25	0.42	0.12	1.45	1.64	0.36	-0.58	1.74	-0.23
SLC39A3	-1.39	-0.46	-1.87	-1.54	-1.83	-0.58	2.52	0.77	0.96	-1.14	-1.83	-0.33	0.71	0.74	-0.2	-0.49	-1.14	-0.55	-0.21	-0.6	-1.22	-0.25	0.59	0.06	0.64	1.18	1.05	-0.09	0.21	-0.69	0.18
AHSG	0.17	-0.63	-0.34	0.1	-1.82	-0.42	-0.78	-0.49	-1.2	-0.3	-1.51	-0.51	-0.09	0.16	0.31	0.28	0.37	0.82	0.09	-0.37	-0.43	-0.34	0.1	-0.25	-0.32	0.35	0.32	-1.24	-2.04	-0.18	-0.16
CBFA2T3	-1.59	-1.42	-1.81	-2.23	-1.82	-0.56	-1.11	0.21	0.47	0.08	0.74	1.37	-0.25	0.44	0.75	-0.77	-1.54	0.17	-0.29	0.02	0.51	0.41	0.63	-0.44	0.39	-0.25	-0.32	0.46	0.75	1.05	-0.27
CCNO	-1.59	-1.39	-1.75	-1.05	-1.82	-1.89	0.08	-0.79	-1.21	-0.63	-0.56	1.63	-0.18	0.17	0.66	-1.18	-0.16	-0.04	-0.72	0.04	-0.19	2.18	0	-0.4	0.32	0.47	0.68	-0.21	-0.95	0.33	-0.75
CDT1	0.68	-0.34	-0.06	0.93	-1.82	-0.68	-2.15	-1.57	-1.17	-1.13	0.8	-0.61	0.14	-0.16	0.75	-1.56	0.63	1.38	0.64	0.76	0.43	-1.97	-0.14	-0.22	-1.44	0.17	0.52	-1.13	-0.58	-0.67	-0.57
CGNL1	-0.72	-1.13	0.05	-1.78	-1.82	-1.07	0.07	-0.53	-0.4	-0.28	0.07	-0.27	-0.32	-1.37	0.25	-0.34	-0.9	-2.05	-0.99	-1.59	-0.68	0.53	-1.4	-0.43	-0.84	-0.49	-0.01	-0.89	-1.17	-0.67	-0.56
D2HGDH	-0.62	-0.21	-1.9	-0.15	-1.82	1.59	1.94	1.51	1.01	0.31	-0.06	1.02	1.06	0.4	0.73	0.59	0.13	-0.86	-0.92	-0.29	0.03	1.21	0.73	-0.1	1.13	0.95	0.32	-0.29	-0.69	-2.14	-2.74
FZD1	0.85	0.9	0.44	0.37	-1.82	-0.02	2.2	2.78	2.19	-0.23	-0.35	-0.65	-0.95	0.32	-1.53	1.39	-0.37	-0.63	0.83	0.7	0.53	-1.11	-1.13	-0.35	-0.43	-0.02	-0.86	0.28	0.06	-0.56	-0.2
GPR142	-0.57	0.64	-0.18	0.43	-1.82	1.3	0.5	0.88	-0.43	-0.17	-0.85	-2.63	-0.34	0.25	1.49	1.51	-0.65	-0.13	-0.33	1.42	-0.19	0.03	-1.03	-1.01	-1.1	-0.79	-1.96	0.05	0.02	-1.24	-0.41
KIAA1024L	-0.44	-1.01	-0.2	-0.76	-1.82	0.33	0.48	0.01	1.02	0.12	0.05	1.12	-1.8	-0.68	0.51	-0.8	-0.44	-0.72	-1.16	-0.34	-0.17	-1.38	-0.55	-0.63	-0.86	-0.5	-1.01	-1.39	-0.36	-0.85	-1.05
LMO7	-0.07	-1.75	-2.05	-0.88	-1.82	-1.34	-1.94	-0.52	-0.95	-2.59	0.56	0.06	0.71	-0.34	0.06	-1.44	0.6	0.8	-0.84	-1.82	-2.36	-0.5	-0.4	-0.47	-1.32	-0.88	-0.41	-0.58	-0.17	-1.42	-0.91
MAT1A	0.12	0	-1.76	-1.26	-1.82	-0.73	0.82	0.07	-0.02	0.79	-0.59	-0.09	0.78	-0.66	0.22	1.62	-0.88	0.2	-0.37	-0.76	-0.53	-0.35	0.29	0.66	-0.24	-0.94	0.78	0.71	0.58	0.79	1.29
OR6A2	-0.34	1.01	-0.6	-1.74	-1.82	-0.9	0.07	-0.78	-0.33	-0.41	-0.61	0.76	0.78	-0.11	-0.47	-1.04	-0.18	-0.78	-0.32	-2.07	-1.55	-1.23	0.1	0.4	-0.65	-0.42	-0.9	0.33	0.45	0.9	0.56
VWA7	-1.8	-1.1	-0.86	-2.1	-1.82	-0.03	0.94	1.17	0.19	1.25	-0.48	-0.46	-0.39	-0.28	0.72	-0.29	0.82	0.48	0.57	1.16	1.34	-1.12	-0.06	-0.29	1	-0.17	0.26	-0.19	-1.08	-1.39	-0.79
ACTG1	-1.02	-0.46	-0.45	-0.53	-1.81	-0.08	0.67	2.65	0.77	0.07	-0.04	1.68	-1.74	-0.69	-0.53	-2.9	0.12	-2.5	-2.82	-2.57	-1.2	-2.65	1.39	-2.47	2.38	-3.48	-0.61	-0.76	0.46	-1.33	-0.8
CLTC	-0.52	-0.78	-0.12	-0.54	-1.81	-0.17	-0.49	-0.05	-0.57	1.05	-0.06	-1.55	-0.79	-1.65	-2	0.01	0.56	-0.79	0.7	-1.53	-1.55	-1.8	-0.88	-1.65	-1.79	-2.39	-1.26	-0.65	-0.22	0.87	0.72
FAM101A	-1.19	-0.76	-3.08	-0.67	-1.81	1.16	-0.75	1.62	0.77	0.77	0.74	0.96	0.85	0.51	0.88	0.32	-1.36	-1.28	-0.77	-0.49	0.35	-0.88	0.73	-1.08	0.05	0.25	-1.03	0.2	1.14	0.57	1.59
GOLGA4	-0.05	-1.38	-0.97	-0.74	-1.81	-0.48	-1.15	-0.18	-1.09	0.35	0.31	1.37	0.19	0.43	-0.61	-1.3	-1.57	-1.34	-0.59	0.36	0.03	0.51	-0.22	0.49	-0.08	-0.46	-0.1	0.59	-0.55	-0.45	0.89
HIST1H3H	-0.16	1.03	0.58	-1.19	-1.81	0.19	0	-0.71	-0.18	-0.5	1.62	1.83	0.05	0.84	0.69	0.85	0.41	1.08	-0.29	0.68	-0.02	-0.56	0.16	0.08	-0.42	0.49	0.65	0.97	-0.22	-1.1	-0.13
LTBR	-0.39	0.04	-0.04	-0.95	-1.81	-1.43	-0.62	-1.32	-1.63	-0.29	-0.52	0.07	-0.22	0.01	-0.04	-0.11	0.97	-0.46	-0.32	0.93	0.96	0.39	-0.86	0.72	1.34	0.62	1.61	-0.58	0.71	0.62	-1.47
MROH9	-2.02	-1.97	-1.57	-1.09	-1.81	-0.36	-0.55	-0.07	-0.66	-0.25	0.29	0.66	-1.11	-0.6	0.05	-0.11	-0.56	0.15	-0.01	-0.23	-1.05	0.53	0.16	0.06	-1.33	0.18	0.67	-1.11	-1.23	-0.1	-1
SFXN2	-0.08	1.1	0.75	0.08	-1.81	-1.08	0.51	-2.47	-1.21	-0.61	0.9	0.12	0.35	1.34	0.64	0.43	-1	-0.15	0.48	-0.19	-0.01	0.73	0.39	0.13	1.94	0.67	1.54	-0.67	1.35	0.4	-0.27
SLC30A9	0.98	-0.84	0.47	-0.38	-1.81	0.45	-0.53	0.22	0.38	-0.24	0.18	-0.31	0.24	-0.85	-0.65	-0.27	-1.74	-0.97	-0.79	-1.26	-1.56	0.01	-1.6	-1.6	-0.07	-1.58	-1.2	-0.99	-0.48	-0.19	1.31
SNAI2	-0.35	-0.64	-1.33	-0.18	-1.81	1.31	0.16	-0.27	0.04	0.24	-0.32	-0.56	0.43	0.94	0.11	1.34	-0.36	0.75	1.4	0.62	-0.25	-3.43	-0.09	-0.33	0.1	-0.06	-0.37	-1.4	-0.76	-0.31	-0.58
ZNF281	-1.17	0.21	-0.23	-0.41	-1.81	1.16	-0.21	-0.55	1.26	-0.12	-1.03	-1.27	-1.48	0.58	-0.04	-0.71	0.85	2.06	-0.43	1.6	-0.51	0.7	-0.22	0.03	0.09	0.93	-0.78	0.3	0.27	-1.22	0.51
ARGLU1	-0.99	-0.21	-1.18	-0.3	-1.8	-0.6	-0.3	-0.6	-0.46	0.24	0.06	0.1	0.66	-0.61	-0.11	-0.22	0.13	0.73	1.95	1.75	0.45	0.16	-0.4	-0.8	-0.66	-0.99	-2.04	-0.64	-1.18	0.12	-1.42
ASIC3	-0.19	-1.69	-3.53	-1.44	-1.8	0.92	1.13	0.38	0.64	1.04	-0.89	0.23	-0.17	1.23	0.66	-0.82	-1.26	-1.31	-0.36	-0.68	-0.51	0.09	0.69	0.1	-0.15	0.15	-0.46	0.05	0.01	0.73	0.84
BECN1	-1.01	-0.95	-0.23	-1.23	-1.8	1.05	1.09	0.27	0.07	0.26	0.6	0.63	-1.8	0.33	0.36	0.42	-0.26	-0.95	0.5	-0.02	-0.45	-0.35	0.09	1.64	0.79	1.72	0.86	0.77	0.91	0.7	1.03
CHRDL1	-1.08	-1.81	-1.02	-0.74	-1.8	0.45	-0.76	-0.45	0.27	0.51	0.8	-0.08	-1.31	0.62	0.07	0.38	-0.64	0.21	-0.58	0	-0.14	-0.09	0.41	0.17	1.23	0.55	-0.45	-0.25	0.45	1.06	1.33
DEAF1	-2.54	-1.19	-1.73	-1.78	-1.8	1.52	1.51	0.48	1.92	-0.12	0.68	0.69	-1.18	-0.58	-1.26	0.82	0.32	0.6	-0.29	0.16	0.21	-0.35	-0.81	0.32	0.06	0.25	-1.25	0.17	-0.76	0.22	-2.47
DHRS7C	-0.85	-0.28	-1.4	-2.02	-1.8	-0.78	-0.18	-0.49	-0.28	-0.44	-0.07	-0.2	-0.46	-0.12	-0.22	0.03	0.72	0.66	0.26	0.74	-0.02	0.1	-1.13	-0.43	-1.3	-1.2	-1.98	1.94	0	-0.18	0.23
EFHD1	0.44	-0.69	0.14	-0.14	-1.8	-0.27	-0.9	-0.53	-0.02	-0.84	0.12	1.18	0.8	-0.52	0.39	-0.74	-0.17	0.2	0.8	0.68	1.02	-0.3	0.02	0	0.52	0.26	-1.1	-1.05	1.8	1.5	1.07
FAM20A	-1.02	-1.75	-0.73	-1.17	-1.8	0.69	-0.61	0.37	0.83	0.07	0.88	-0.67	-0.25	0.25	-0.36	-0.06	-0.23	0.99	-0.52	-1.4	-0.83	0.03	-0.06	-0.32	-0.68	0.21	-0.53	-0.22	1.38	1.06	-0.49
FAM8A1	-1.47	-0.14	-1.49	-1.4	-1.8	1.35	0.54	0.3	0.71	0.75	-0.35	1.34	0.62	1.02	1.36	0.39	0.83	-0.28	-0.02	0.5	0.18	0.54	0.78	0.09	0.2	-0.35	1.45	-1.09	1.54	2.04	1.64
FOXD2	-1.02	0.6	-0.59	-0.23	-1.8	0.17	0.61	0.96	0.35	0.48	0.38	1.77	0.47	1.19	0.11	0.71	-1.19	-1.52	-0.48	-1.46	-1.41	1.18	0.53	0.46	-0.06	0.9	0.57	0.79	1.01	0.35	0.05
HS1BP3	-0.02	-0.79	0.54	0.17	-1.8	-0.01	-0.45	0.51	0.01	-0.65	-1.08	0.28	0.81	0.59	-0.27	0.65	-1.42	-1.58	-0.59	-0.27	0.36	-0.8	0.73	-0.52	1.02	-0.32	1.1	0.37	-0.8	-0.24	0.07
IER2	-0.62	-0.88	-1.08	0.12	-1.8	-1	-0.13	-0.63	1.38	-1.97	0.32	-1.12	-0.13	-0.06	0.13	-0.5	0.97	0.54	-0.44	0.35	-0.47	-0.29	-2.06	-3.31	-1.12	-1.13	-0.31	0.59	-0.77	-1.04	-0.11
OPTC	-0.06	-0.85	0.58	-0.19	-1.8	0.29	0.9	0.2	1.32	0.03	-2.66	-2.28	0.39	0.53	0.51	1.22	-0.24	-0.29	0.47	-0.57	0.43	0.9	1.1	0.53	0.81	0.53	1.44	1.79	-1.41	-0.98	-0.02
PKLR	-0.11	0.65	0.08	1.39	-1.8	1.48	1.02	0.73	1	0.16	-0.36	-0.81	0	-0.15	1.25	0.6	-0.14	-0.45	0.11	-1.36	-0.91	0.69	-0.42	-0.25	-0.69	-0.14	-0.79	1.53	0.4	-0.74	0.58
SLC17A7	-0.6	-0.91	-0.75	-0.78	-1.8	-0.86	-0.35	0.04	-0.79	-1.26	-0.63	1.06	1.62	0.3	1.41	-0.08	0.54	-0.12	0.1	0.3	0.24	-1.03	0.13	1.09	-0.17	0.43	0.61	-0.25	0.28	0.08	-1.36
SPACA1	-1.34	0.32	-2.52	-2.11	-1.8	-0.3	0.49	0.36	0.47	0.98	0.23	-0.03	-0.16	-0.86	0.83	-0.48	-0.6	0.49	-0.16	0.57	0.36	0.91	0.26	0.09	0.6	0.91	-0.27	1	-0.22	0.44	0.73
TREX1	-0.43	-1.16	-0.2	-0.04	-1.8	-0.54	0.17	-0.85	0.36	0.61	0.28	-0.15	0.84	-0.45	0.39	-0.22	-0.48	-1.18	-0.53	0.11	0.57	-0.68	0.12	0.47	0.59	0	0.14	0.29	-1.16	-0.79	0.14
TUBAL3	-0.13	-2.12	0.12	-2.08	-1.8	-1.49	0.03	-0.85	0.47	0.06	0.56	0.07	0.82	1.31	-0.21	-1.57	1.93	0.08	-0.95	-1.09	-0.7	-0.2	1.22	0.44	0.82	0.18	1.88	0.43	0.39	0.92	2.41
APBB2	0.28	-0.2	-0.31	0.47	-1.79	-0.3	-0.58	-0.79	-1.03	-1.8	-0.43	-1.45	0.25	-0.25	0.09	-0.36	-0.25	-0.83	-0.16	-0.74	-0.98	-0.13	-0.12	-0.96	0.37	0.4	-0.76	0.25	-0.06	1.38	0.53
BPI	-0.66	-1.53	-0.78	-1.4	-1.79	-0.6	0.24	0.3	-0.86	0.35	-0.54	-0.89	0.08	-0.08	-0.77	0.17	0.02	0.53	-0.73	-0.97	-1.15	-0.16	0.7	0.84	0.34	0.95	1.41	-0.75	-1.59	0.01	0.11
FBXO46	-0.27	-1.53	-0.55	-2.06	-1.79	0.97	0.94	-0.42	0.74	-0.74	0.7	0.51	0.75	0.86	-0.62	-0.62	-0.7	0.49	-0.06	0.04	-0.21	-2.04	-1.9	-0.29	-1.4	-0.36	-2.92	-0.39	0.12	0.16	0.38
FLNA	-0.11	0.63	0.22	-0.37	-1.79	-0.09	-0.12	0.33	-0.87	-0.32	1.82	1.44	0.59	0.96	0.27	1.1	-1.37	-0.33	-0.64	-0.34	-0.4	0.06	-0.76	0.84	0.52	0.02	1.28	-0.69	0.08	0.02	0.27
MRPL52	-1.76	-0.98	-0.86	-1.44	-1.79	0.32	0.23	0.3	-0.81	0.05	-0.18	0.26	-1.39	0.18	-0.78	1.12	0.73	0.5	-0.16	0.1	-0.41	-0.02	-0.6	-0.84	0.45	1	-0.3	-0.16	-0.78	-0.08	0.07
RHEBL1	-0.69	-0.67	-0.56	-1.54	-1.79	0.2	-0.15	-0.28	-0.22	-0.91	1.02	0.65	-0.48	-0.3	-0.23	-0.25	-0.19	-1.71	0.25	-0.21	-0.27	0.1	-0.78	-0.36	-0.03	0.87	-0.57	0.04	0.25	-1.02	0.1
TAC3	0.83	0.32	0.72	0.77	-1.79	0.02	0.1	-0.43	-0.53	-1.08	0.25	-0.83	-0.43	-0.41	0.18	2.24	1.43	0.12	-0.24	-0.92	-0.38	1.18	-0.25	1.07	-0.03	0.38	1.02	0.47	0.2	0.27	0.61
ZCCHC10	-0.39	-0.84	-1.58	-1.73	-1.79	-0.29	0.53	0.42	-0.2	0.75	-1.57	-0.73	0.63	-0.66	-0.01	0.08	-2.04	-1.67	-0.75	-1.14	-0.32	0.49	0.84	0.21	0.01	-0.26	-1.34	-0.41	-0.99	-0.32	-1.47
CC2D2A	-0.01	-1.99	0.21	-0.58	-1.78	-0.96	0.23	0.62	1.42	-0.31	-1.5	-0.94	-1.07	-0.21	-0.29	-0.61	-2.2	-1.18	-0.71	0.01	-0.38	-0.61	-1.22	-1.38	-0.55	-1.09	-1.58	1.08	-0.91	-0.77	-0.38
CCNB1IP1	0.56	-0.37	0.31	-0.06	-1.78	-0.86	0.02	-1.53	-1	-1.02	-0.13	0.5	-0.55	-0.19	-0.33	-1.8	-0.43	-0.01	-0.26	-0.03	-0.65	0.54	0.95	0.22	-0.33	0.84	1.71	-0.51	-0.81	-0.83	-0.79
GPR108	0.25	-0.29	-0.44	-1.03	-1.78	-1.15	-1.08	-0.95	-1.43	-1.1	-0.66	0.84	-0.81	0.01	-0.81	-0.31	-0.35	0.37	-0.18	0.58	0.08	0.24	-0.58	0.07	-0.27	-0.4	-0.24	1.11	-0.15	0	-1.43
HSP90AB1	-1.58	-1.4	-1.63	-1.72	-1.78	-1	0.09	-0.42	1.34	-1.72	1.71	1.6	-1.53	-0.1	-0.54	0.43	1.12	-0.69	-3.8	-1.46	-2.07	-1.88	-0.25	-5.53	-3.5	-4.17	-4.6	1.06	-5.12	-3.28	-2.72
ISG15	0.71	-1.44	-1.09	-1.19	-1.78	-1.29	-0.61	-1.06	-1.03	0.14	-0.82	0.17	-0.46	0	0.9	-1	-0.03	-0.31	-0.08	0.61	0.1	0.91	-0.84	0.1	-1.45	-0.69	-1.23	0.41	-0.29	-0.51	-0.08
ITGBL1	-0.13	-1.15	-0.84	0.33	-1.78	-0.33	-2	-0.5	-1.61	-1.54	-0.03	-0.87	2.24	0.47	-0.49	1.76	-0.08	0.23	-0.78	-0.87	-0.94	-1.61	1.31	0.25	0.37	1.04	1.7	1.06	-0.13	0.08	0.65
KLHL26	0.61	0.07	-0.04	0.21	-1.78	0.92	0.76	0.55	0.26	1.13	-1.11	-2.03	-0.17	0.83	-0.3	0.04	-2.07	-0.37	-0.25	0.17	-0.27	0.05	0.06	-0.03	-0.27	-0.8	-1.09	0.48	0.85	2.34	1.45
KRT82	-0.55	-0.83	0.32	-0.12	-1.78	1.17	1.11	0.28	0.52	1.49	-0.52	0.28	-0.4	0.88	-0.21	0.68	1.34	-0.09	0.62	0	1.36	0.92	1.29	0.55	1.08	0.56	-0.29	-0.63	0.03	-0.17	-0.03
OR5D16	0.66	-2	-0.27	0.8	-1.78	-0.07	-0.87	0.68	-0.65	-0.14	0.08	0.25	0.03	0.6	-0.56	-0.29	-1.03	1.2	0.05	0.29	0.13	1.27	0.15	0.17	-0.21	0.54	1.12	-0.06	-2.62	0.34	-1.47
OTUD1	-0.99	0.32	-0.2	-0.13	-1.78	-1.18	-0.01	0.12	-1.06	0.46	1.44	2.72	-1.6	1.58	1.46	-0.01	1.77	2.19	0.13	1.38	0.95	0.14	0.71	0.3	0.82	1.26	2.01	0.14	0.4	-0.18	-3.28
RPUSD3	-1.97	0.22	-1.15	-1.19	-1.78	0.88	0.63	0.39	-0.46	1.16	0.44	-0.21	0.14	0.14	-0.06	-0.33	-0.01	0.59	0.08	0.73	0.19	2.12	0.58	-0.58	0.9	0.94	1.09	-0.75	-1.77	-0.92	-1.53
VN1R2	-2.87	-1.97	-2.12	-3.08	-1.78	0.23	0.12	0.3	-0.64	-0.39	-0.44	-0.97	0.8	-0.32	0.17	1.08	-1.33	0.18	-1.43	-0.53	-0.13	2.24	-0.31	0.44	-0.24	0.37	-0.21	0.85	0.12	0.06	0.07
ZFP1	-1.33	-1.37	-1.56	-1.26	-1.78	-0.91	-0.5	-0.76	-1.03	-0.22	0.7	0.09	0.65	0.41	-0.25	0.01	1.35	-0.52	0.48	0.7	0.74	1.15	-0.17	1.44	0.41	-0.29	1.31	-0.2	1.03	1.45	1.25
APC2	-2.52	-0.83	-1.71	-1.87	-1.77	-0.38	-0.97	-0.94	-0.53	0.79	2.08	1.14	1.15	0.5	-0.48	0	-0.02	0.52	0.53	0.06	-0.22	0.28	0.59	-0.07	1.48	0.93	1.98	0.54	1.08	0.1	-0.83
C4A	-0.86	-1.56	-0.64	-0.95	-1.77	-0.5	-0.31	1.43	1.01	0.2	NA	NA	NA	NA	NA	-0.36	NA	NA	NA	NA	NA	1.85	0.57	-0.26	0.74	0.41	-0.46	1.09	-1.09	-0.29	0.41
EXT1	0.3	1.2	-1.47	0.73	-1.77	-2.15	-1.09	-0.17	-1	-0.02	-2.64	-1.21	-0.02	-1.68	-2.08	-4.71	-0.07	-1.85	-2.82	-1.07	-0.58	0.58	0.71	-5.27	0.38	-2.98	-2.67	-1.05	-0.43	-2.06	-1.41
FUT6	-0.19	-2.02	-0.67	-1.54	-1.77	0.48	1.06	0.02	1.25	-0.11	-1.26	0.09	-0.47	0.12	0.35	0.71	0.2	-0.13	0.32	0.07	-0.21	-0.36	0.66	-0.91	0.14	0.08	0.44	-1.96	0.84	-0.88	0.29
GFRA3	-0.75	-1.71	-0.69	0.06	-1.77	-0.04	1.44	1.16	-0.82	0.49	-0.31	-1.39	-0.41	0.44	0.1	-0.61	1.1	0.61	-0.1	-0.09	0.28	0.06	0.64	-0.68	-0.11	1.03	-0.46	1.07	0.86	0.43	-0.38
GIPR	-2.19	-1.65	-0.39	-1.35	-1.77	-0.76	0.76	-0.27	-1.31	-0.43	0.08	1.01	1.2	1.18	0.23	1.36	0.16	0.04	-0.81	-1.47	-1.59	1.36	0.91	0.52	-1.36	0.61	-1.35	-0.02	0.21	-0.28	0.42
HTR7	-0.92	-0.39	-0.56	-1.61	-1.77	0.65	-0.9	0.73	-0.64	-0.08	-1.15	-1.54	-0.32	-0.83	0.16	0.41	-0.66	-0.02	0.54	1.02	0.64	0.33	0.36	0.99	0.96	-0.78	0.14	-1.5	1.27	1.55	2.27
KANSL2	-0.2	-0.12	-0.38	0.31	-1.77	1.11	0.79	0.2	0.88	-0.43	0.19	0.28	-1.76	-1.05	-1.83	2.51	-0.72	-2.19	-0.06	0.72	1.47	1	0.05	-0.53	-1.92	-3.16	-0.96	0.91	-0.28	0.48	-1.05
KIAA1524	-1.73	-3.38	-6.47	-2.94	-1.77	-2.56	-0.13	-1.9	-3.69	-0.96	-3.22	-0.29	-8.46	-3.33	-3.92	-1.57	-0.07	0.09	0.11	-0.42	-0.87	-1.19	-1.18	-0.55	-1.02	-8.39	-0.6	-4.17	-1.1	-2.75	-1.33
MBD6	0.09	0.9	-0.02	0.9	-1.77	-0.01	0.44	0.27	-0.09	0.8	-0.23	0.67	0.3	1.09	-0.15	0.14	1.63	1.29	1.33	0.62	0.86	0.09	0.22	-0.35	-0.66	0.63	1.07	1.05	0.42	0.24	0.59
MRGPRE	-2.83	-1.78	-1.57	-2.93	-1.77	0.72	2.21	1.49	0.29	0.81	-0.81	-0.78	-1.37	0.7	1.19	-1.5	-0.43	-0.06	-0.22	-0.81	-0.57	-0.35	-1.25	0.06	-2.05	-1.98	-1.84	-0.71	-0.25	0.02	-0.32
MS4A3	-1.11	-0.46	-0.88	-1.62	-1.77	-0.37	-0.98	-0.6	-0.52	-0.35	1.22	0.91	1.42	0.63	-0.37	-0.73	-0.64	-0.42	-0.82	-1.06	-1.61	0.94	0.59	0.42	0.78	0.72	1.2	-0.33	0.46	0.17	0.07
NPY5R	0.08	-1.01	-0.87	-1.22	-1.77	0.34	-0.84	0.9	0.42	-0.01	0.49	-0.46	0.85	-0.1	0.39	1.61	-0.04	0.51	0.36	-0.66	-0.16	0.38	-0.88	-0.82	0.42	0.39	-0.27	0.06	0.61	0.09	0.04
PAF1	-1.84	-1.03	-1.55	-1.27	-1.77	0.85	1.83	0.71	0.11	1.44	0.28	-0.86	0.38	-0.55	0.78	-0.07	-0.13	0.21	-1.9	0.01	-0.21	0.78	0.45	-0.16	-0.32	0.31	0.12	-1.38	-0.2	-0.87	-1.49
PAXIP1	-0.61	-3.3	-1.47	0.16	-1.77	-5.18	2.31	-3.25	0.36	-3.96	-0.59	-2.89	0.58	-4.37	-4.4	-5.75	0.47	3.38	-0.31	-1.35	-2.01	-0.47	-3.72	2.19	-4.51	-0.95	-0.43	-7.24	-1.91	-0.8	1.37
TRMT44	-0.71	-0.87	0.33	-0.37	-1.77	0.2	-0.94	0.34	-0.32	-0.24	-0.79	0.54	1.35	-0.8	-0.49	-1.04	-0.34	0.76	0.15	-0.41	-0.67	0.24	-1.1	0.11	-0.49	0.11	-0.05	0.65	-0.56	0.78	0.92
WFIKKN2	-0.23	1.53	0.48	-0.01	-1.77	0.45	0.9	0.67	1.25	0.49	-0.54	0.58	0.95	-0.45	0.7	0.85	1.35	0.01	0.26	0.68	-0.27	-0.56	-0.13	0.13	-0.12	0.66	-0.37	0.34	0.98	-0.28	0.99
ZNF385A	-1.74	-0.88	-1.07	-3.12	-1.77	-0.32	-0.79	-0.47	-0.1	0.44	-0.34	-0.67	-0.87	0.56	-0.22	0.72	-0.26	-0.59	-0.13	-0.73	-1.3	0.99	0.09	-0.21	-0.31	0.26	-1.18	0.67	-0.22	-0.49	-0.21
ZSCAN2	0.56	0.65	0.09	1.06	-1.77	-0.87	0.42	-0.87	-0.43	-0.32	-2.56	-0.9	-0.75	1.16	0.34	-0.53	2.31	0.56	0.24	0.46	-0.67	0.38	0.38	0.28	-0.18	-0.56	-1.01	-1	0.19	0.17	-0.42
ANO8	-1.15	0.37	-1.27	0.2	-1.76	-0.66	0.01	-1.35	0.87	-1.19	-0.89	-0.98	0.21	0.93	0.39	-0.11	-0.64	-0.62	-0.3	0.79	0.71	-1.98	-1.11	-0.14	-0.46	0.29	-0.57	0.77	-0.02	1.02	0.52
EVX2	-1.07	-1.04	-2.66	-2.16	-1.76	-0.25	0.5	0.09	-0.05	1.07	0.95	1.21	-1.35	0.53	0.59	-1.77	2.06	1.58	-0.35	0.45	0.96	0.77	0.61	-0.07	1.8	1.45	1.18	-0.73	1.01	1.07	0.9
KCTD8	-3.65	-1.19	-2.04	-2.64	-1.76	-0.18	-2.44	-1.25	-1.05	-0.65	0.47	1.22	0.76	-0.33	-0.43	0.7	-0.63	-0.55	-1.9	-1.04	-0.87	1.31	-1.27	-1.02	-0.49	-1.78	-1.47	0.96	-1.57	0.22	-0.43
MAP1S	0.38	-0.49	-1.06	-0.04	-1.76	0.69	1.56	1.9	1.74	0.81	-0.85	1.54	-0.34	0.4	-0.04	-0.19	1.01	0.17	-0.27	-0.06	-0.75	1.77	-0.27	-0.43	0.35	0.74	0.84	-0.2	-0.42	-0.23	-1.39
PGAP2	0.82	-1.36	0.38	0.89	-1.76	0.61	-0.55	0.9	-0.11	-0.47	-0.2	0.6	-0.73	0.03	0.77	-0.19	0.57	0.55	0.02	-0.52	-0.91	-0.97	-0.22	1.55	-0.27	-0.25	0.14	0.3	1.05	-0.2	-0.48
SNX2	-0.6	-0.62	-1.12	-1.28	-1.76	0.51	-1.02	0.19	0.2	0.23	-0.95	-0.67	-0.11	-0.7	0.75	-0.81	-1.34	-0.76	-0.54	-1.22	-1.52	0.3	1.49	0.44	0.91	0.94	-0.07	0.99	-0.37	0.31	1.6
TMPRSS11F	-0.49	-1.26	-0.68	-0.88	-1.76	-0.95	-1.54	-0.31	-0.23	-0.08	-0.91	-2.25	1.32	0.56	0.3	0.99	-1.13	-1.44	-0.59	-0.61	-0.39	-0.06	0.78	0.51	1.01	0.4	-0.14	-0.69	-0.63	0.68	0.15
ACAD11	-1.52	-2.69	-0.47	-0.88	-1.75	-0.59	0.89	-0.56	0.37	-0.18	0.38	-0.56	0.72	-0.64	-0.15	-0.25	-0.63	-0.71	-0.18	0.24	0.77	-0.29	1.55	-0.17	0.8	0.31	0.6	-1	-2.49	-0.67	-0.36
ADAMTSL2	0.19	0.21	-1.31	0.09	-1.75	1.8	1.35	1.98	1.09	0.96	-0.4	-1.23	-0.38	0.63	0.63	-0.4	-0.56	0.44	-0.55	0.24	-0.12	1.18	0.35	0.57	1.5	0.79	0.55	0.66	0.44	1.97	0.22
ADCY3	-1.57	-1.09	-1.56	-1.33	-1.75	-0.15	0.39	0.3	0.28	-0.61	0.98	1.23	0.67	-0.25	-0.55	-0.36	0.04	1.08	-0.02	-0.68	0.44	0.15	0.27	-0.12	0.52	0.38	0.63	-0.21	1.63	0.67	0.05
ATG14	-1.68	-1.99	-2.6	-2.91	-1.75	-1.61	-1	0.06	0.39	-1.17	-0.86	1.14	-1.8	-0.33	-0.41	-1.14	-1.52	-1.92	-0.68	0.23	-0.42	-2.07	-0.84	-2.56	-0.28	-0.42	0.64	-2.31	-0.22	-1.15	0.24
BRD1	-0.72	-1.29	0.73	-0.22	-1.75	0.62	-1.29	-0.56	-0.16	-1.19	-2.79	-0.98	-1.6	0.59	0.95	-0.85	-0.17	1.02	0.78	0.97	0.89	-0.01	0.11	-3.07	0.55	-2.79	-2.34	-0.7	2.15	0.46	0.23
CH25H	-1.46	-0.17	-1.07	-0.85	-1.75	0.43	-0.06	-0.62	-0.23	0.3	0.91	0.53	0.96	0.37	0.53	0.21	0.43	-0.65	-0.33	-1.11	-0.59	0.88	-0.16	-0.29	0.28	-0.82	0.98	0.88	0.67	0.21	-1.69
COG3	-1.2	-0.76	-1.61	-1.22	-1.75	-0.26	-2.05	-2	-2.02	-1.59	0.58	-0.35	-0.07	0.2	-1.34	0.58	0.73	-1	2.4	1.87	0.91	-0.47	1.03	-1	-0.12	-0.15	-0.63	-0.44	0.06	-0.34	-0.03
CRTC2	0.39	-0.62	-0.07	-0.55	-1.75	0.13	0	1.07	-0.07	0.35	-0.87	0.3	0.07	0.38	-0.34	-0.06	0.3	-1.27	-0.37	-0.43	-0.8	0.31	0.47	0.2	0.58	-0.5	1.28	-0.22	0.3	-0.24	-1.69
CYP4F11	-0.89	-1.03	-0.53	-1.62	-1.75	-0.33	0.2	0.16	0.42	-0.26	-0.07	-0.02	0.27	0.65	0.34	0.07	0.33	0.3	0.13	-0.69	-1.04	-0.62	-0.53	0.35	-0.45	-0.33	0.56	0.69	-1.19	-0.4	-0.15
LIMCH1	-1.05	-0.96	-1.25	-1.75	-1.75	0.88	-0.05	0.77	0.4	-0.22	-1.15	0.45	1.35	0.38	0.1	-1.3	-0.29	-0.73	-0.53	0.23	0.56	0.15	0.28	-0.68	2.33	1.44	0.09	0.1	-0.11	-1.13	0.78
MAN2C1	-1.05	-2.15	-1.7	-1.01	-1.75	-1.6	-1.38	-1.6	-1.79	-1.23	-0.33	1.04	-0.11	-0.55	-0.32	-0.62	1.08	0.37	0.88	0.96	1.29	-1.15	-0.17	-0.82	0.67	0.59	0.18	-0.91	-0.65	-1.26	-1.77
PDLIM3	0.42	-0.36	-0.49	-0.69	-1.75	0.22	-0.3	-0.36	-0.24	-0.58	0.51	0.59	1.15	1.03	-0.57	0.72	-1.07	-0.93	-0.98	-0.5	-0.62	0.23	-0.57	0.02	0.2	-0.25	-0.74	0.28	-0.2	1.11	0.34
PFDN1	-0.79	-0.44	-0.12	-0.85	-1.75	-0.86	0.72	0.11	0.17	-1.13	-1.91	-0.59	0.18	0.04	1.4	-0.65	1.2	-0.36	-0.49	1.21	-0.15	-3.21	-0.53	-1.33	1.43	-0.77	-0.05	0.05	-0.24	-0.65	-0.93
SHPK	0.08	-0.07	1.41	1.03	-1.75	1	0.39	-0.02	0.04	-0.09	1.03	0.96	-0.22	0.21	0.06	-0.8	-0.45	-0.56	-0.58	0.03	0.04	0.4	0.24	-0.26	0.25	-0.88	-1.15	-0.4	0.09	0.83	1.26
TECPR2	-0.89	-1.11	-1.41	-1	-1.75	0.68	0.35	0.63	0.29	0.7	0.21	0.02	-0.39	1.09	0.05	-0.12	-1.06	0.25	-0.65	-0.88	-0.4	0.31	-0.17	-0.33	0.28	-0.29	0.39	1.8	-0.82	-0.92	-1.27
TMEM248	-0.87	-1.04	-1.24	-1.37	-1.75	-0.32	-1.56	-0.87	-1.37	-0.28	-1.27	0.52	-0.61	-0.54	-0.37	-2.04	0.09	-1.12	0.51	-0.56	-0.99	1.04	-0.82	0.32	-0.62	-0.06	-1.18	0.58	-0.54	0.58	-0.27
UTS2R	-1.24	0.11	-0.47	-0.58	-1.75	1.16	0.38	0.24	1.35	0.45	0.01	1.21	-0.27	-0.38	0.2	-0.19	-0.09	-0.93	-0.85	0.29	0.35	1.19	1.51	-0.47	0.41	-0.75	-0.39	-1.36	1.31	1.42	1.37
ZDHHC23	-1.48	-1.9	-0.89	-1.18	-1.75	1.08	-0.09	0.64	-0.04	0.1	-0.82	-0.49	-1.97	0.45	-0.79	-0.17	-0.36	-0.16	-0.04	-0.71	-0.56	-0.91	0.1	0.24	0.91	-0.77	-1.4	0.23	0.54	0.06	-1.28
ALMS1	-2.05	-1.72	-2.01	-1.51	-1.74	-1	-0.59	-0.38	-0.67	-0.24	-0.53	0.47	0.91	-0.33	0.03	0.98	-0.16	-1.17	-0.37	-1.1	-1.08	-0.62	-0.6	0.13	-0.81	0.75	0.35	-0.18	-0.65	0.41	1.55
C9orf96	-0.75	-1.27	-0.72	-1.13	-1.74	0.03	-0.61	-0.47	-0.28	-0.07	1.5	1.04	0.49	0.3	0.38	1.02	1.47	1.13	0.2	-0.63	0.35	-0.37	0.13	0.09	0.25	0.47	0.5	0.43	0.49	-0.01	0.14
DCUN1D5	-1.35	-1.07	-1.87	-1.41	-1.74	-1.54	0.18	-1.86	-1.44	-0.71	1.48	1.64	-0.41	-0.12	-0.63	0.53	0.41	1.6	-1.41	-0.89	-0.78	0.82	0.01	-1.57	-0.46	0.74	0.43	-0.84	-1.09	-3.21	-0.24
EXOC3L2	-1.75	0.16	-1.6	-1.93	-1.74	0.51	0.88	-0.36	-1.01	0.87	-0.69	0.45	0.23	-0.06	-0.06	0.29	-1.56	0	-0.33	0.54	0.27	0.14	0.51	0.45	-1.08	0.27	-0.62	-2.04	0.9	0.89	-0.55
FGF6	-0.24	-0.68	-1.36	-0.37	-1.74	-1.35	-0.26	-0.97	0.3	-1.49	1.99	0.84	0.83	0.91	0.08	-0.19	-0.61	0.88	0.61	-0.28	-1.29	-1.19	0.54	-0.17	0.26	0.99	0.27	0.57	-0.06	-0.06	0.12
FOXJ2	0.03	0.49	0.33	-0.78	-1.74	-1.4	0.22	-1.76	-1.33	-1.7	2.22	0.48	0.14	-0.61	-0.43	-0.48	0.89	0.59	0.31	-1.11	-0.86	1.56	0.48	0.31	-0.54	-0.36	1.42	1.09	-0.13	-0.59	-0.38
GATM	0.06	-1.88	-1.37	-0.64	-1.74	-1.47	-0.68	-1.69	-0.33	-1.4	-1.58	0.74	-0.25	-0.92	-0.32	-1.93	0.01	0.27	-1.05	-1.06	-1.24	1.07	-1	-0.45	-1.58	-0.62	-0.81	-0.06	0.87	0.12	0.82
HHLA3	-0.75	-0.91	-0.48	-0.93	-1.74	-0.37	-0.36	-0.15	0.51	-0.85	0.22	-0.55	-0.53	0.65	0.15	0.53	0.17	0.43	-0.05	-0.67	-0.18	1.25	-0.57	-1.06	0.79	-0.23	-0.81	1.02	0.76	0.12	-0.04
IGLL5	-1.63	-2.37	-1.19	-0.88	-1.74	1.04	-0.19	-0.48	0.81	0.11	0.16	-0.16	-0.4	-0.98	-0.72	0.19	-0.37	-0.33	-0.2	-0.62	0.79	-0.08	-0.17	0	0.14	0.22	1.08	0.63	-1.53	0	-1.44
NECAB2	0.13	0.74	-0.63	-1.14	-1.74	-0.77	-0.26	-0.18	-0.52	-0.1	0.35	-0.57	-0.62	0.03	0.35	1.49	-0.16	-0.15	-1.04	-1.41	-2.08	-0.32	-0.15	0.83	-0.38	-0.59	1.01	1.08	1.05	0.11	-0.49
PDP2	-0.06	-0.01	-0.31	-0.9	-1.74	0.34	1.51	0.78	0.86	0.59	-0.23	-0.33	0.49	-0.68	0.72	1.54	1.5	-0.06	-0.57	0.94	1.59	1.35	-0.38	0.42	-0.06	-0.06	-0.45	-0.81	0.62	1.18	-0.03
PHF5A	-0.97	-1.5	-1.63	-0.43	-1.74	0.27	-0.02	-1.46	-1.03	-1.46	NA	0.19	-1.78	NA	-0.32	NA	0.35	-0.43	1.25	0.75	0.69	0.99	0.67	-0.52	0.41	-0.19	0.99	-0.31	-0.61	-0.63	0.11
SBNO2	-0.29	-0.83	-0.01	-0.33	-1.74	-0.76	-0.71	-1.6	-0.22	-1.08	0.63	0.83	-0.11	0.2	1.2	-0.07	-0.51	-0.07	-0.81	0.69	0.48	0.51	-0.51	-0.13	-0.42	0.54	0.06	0.39	0.46	-0.72	-1.42
SPATA33	-0.96	-0.88	-1.65	-1.06	-1.74	-0.25	-1.3	-0.86	-0.48	-0.89	-1.18	-0.08	0.11	-1.19	0.35	-0.35	1.39	0.29	-0.61	0.57	-0.03	-0.34	-0.69	-0.1	-0.12	0.11	0.69	-0.6	1.19	0.23	0.13
AACS	-0.83	-1.06	-0.7	-0.43	-1.73	-0.53	0.46	0.03	0.17	0.75	-0.34	-0.02	-0.76	1.21	0.76	0.52	-1.14	-0.41	-0.26	-0.13	0.31	-0.69	0.38	-0.27	0.35	0.48	0.51	0.95	0.3	1.35	-1.73
CA11	0.38	-0.27	-0.11	-0.78	-1.73	0.3	1.92	1.02	0.93	0.57	-1.08	0.4	2.43	0.37	0.98	-0.72	0.83	-0.22	0.63	0.7	-0.24	0.65	-0.55	0.52	0.43	0.12	-0.44	-0.68	0.52	-1.45	0.85
CEP57L1	-0.4	0.11	-0.92	-1.69	-1.73	-1.23	-1.39	-0.83	-1.59	-0.34	-0.65	-2.64	0.15	0.59	0.51	-0.86	0.58	-0.86	-0.1	0.47	-0.22	-0.01	-0.06	0.92	-0.45	-1.11	-1.26	1.22	-1.43	-1.25	-1.49
GJA1	1.35	-1.15	-0.31	-0.54	-1.73	1.08	-0.62	-0.57	1.09	-1.1	1.58	-0.74	-0.09	0.78	0.96	-0.18	-0.42	-0.41	-0.06	-0.96	-1.67	-0.09	0.75	0.31	-1.84	0.79	0.39	0.79	-2.63	-0.96	-0.61
PI4K2A	-1.26	-0.88	-2.2	-1.25	-1.73	1.36	0.37	0.82	-0.36	0.8	1.19	0.14	1.23	0.06	-0.33	0.63	1.1	0.37	0.03	0.25	-0.03	0.57	-0.42	0.41	0.44	-0.83	-0.35	0.07	1.66	0.65	-0.19
PLA2G2D	-0.03	0.23	0.07	0.51	-1.73	0.09	0.06	0.94	0.18	0.65	0.34	-0.26	-0.76	-0.22	-0.9	0.01	-0.28	0.61	0.41	0.62	1.2	0.43	-1.41	-0.01	-0.13	0.59	-1.66	0.17	1.35	1.3	1.47
PPP6C	-3.41	-2.45	-1.26	-0.7	-1.73	1	0.46	0.15	0.16	1.49	1.55	0	-1.64	-2.7	-2.2	1.59	0.86	2.11	6.18	4.1	1.58	-0.24	-3.24	5.93	-0.83	-1.74	-1.67	-0.02	-0.3	3.58	-1.02
QPCTL	-1.23	-1.43	-1.78	-1.33	-1.73	-0.57	-0.82	-2.18	-2.38	-0.21	-1.54	-0.51	0.89	-0.45	0.13	-2.75	0.26	1.98	0.21	0.88	0.65	0.59	-0.62	-0.08	-0.52	0.06	-1.57	-0.81	0.9	-0.1	1
SPN	-0.82	1.49	-0.58	-0.43	-1.73	0.13	0.16	0.55	0.65	0.38	0.1	0.74	0.48	-0.09	-0.29	-1.09	-0.07	0.37	-1.09	-0.5	-0.64	0.7	0.62	0.51	1.98	0.9	1.13	0.65	2.11	-0.23	1.04
TAPBPL	0.9	-0.63	-0.39	-0.13	-1.73	-1.59	-1.06	-0.59	-0.92	-0.76	1.1	1.06	-0.48	-0.33	0.52	-0.14	-0.41	-1.22	-0.56	-0.8	-0.75	-0.62	0.56	-0.67	0.57	-1.24	-1.81	-0.05	-0.96	-0.57	-0.74
TMEM202	-1.74	-0.77	-1.89	-1	-1.73	-1.53	0.19	-0.13	0.25	-0.02	-0.38	-1.3	0.62	-0.76	1.08	1.13	-1.34	-0.43	-0.63	-1.38	-1.55	1.64	0.63	-0.75	-1.63	-0.74	-0.83	-1.31	-0.96	-1.6	-1.39
YAE1D1	-1.07	-1.28	-0.69	-1.2	-1.73	0.24	1.78	0.47	0.77	1.2	-1.08	-0.62	0.87	1.28	0.14	-0.01	1.35	0.49	2.47	2.3	1.91	0.13	0.45	0.36	0.85	0.88	1.83	0.01	0.04	0.62	-1.04
ZNF185	-0.42	-0.52	-0.52	-0.71	-1.73	-0.02	-1.41	-0.7	-0.48	0.11	-0.2	0.61	-0.51	0.78	0.02	-1.09	0.52	-0.04	-0.67	0.51	0.16	0.39	0.46	-0.6	1.1	-0.53	-0.26	-0.06	-0.19	0.55	-0.43
ZNF512	-1.65	-1.06	-1.63	-1.56	-1.73	-1.06	-0.24	-0.63	-1.38	-0.32	-0.81	-1.83	0.75	-0.28	0.87	0.82	1.12	-0.67	-0.72	0.06	-0.44	-1.31	0.8	0.79	0.62	0.91	0.96	-0.28	0.01	-1.27	-0.05
AGPAT1	-0.59	-0.9	0.25	-2.03	-1.72	0.5	1.21	0.89	1.23	0.83	-0.63	-0.06	0.84	1.13	-0.17	1.54	1.11	-1.17	-0.45	-0.5	-0.87	-0.69	0.33	-0.84	-0.36	-1	-0.43	0.82	-1.61	-0.09	-0.15
DET1	-1.95	-2.19	-1.32	-2.58	-1.72	-0.43	-0.19	-2.03	-2.19	-0.88	0.81	0.11	-1.71	-0.64	0.61	0.31	-0.39	-0.67	3.25	2.09	0.84	0.65	-2.47	4.16	-0.97	1.1	2.36	-0.26	0.42	1.22	0.49
KANK4	-1.05	-1.97	-1.87	-0.7	-1.72	-0.08	0.33	1.04	0.45	0.18	0.46	1.98	0.05	-0.12	-0.48	-0.13	-0.29	-0.9	-0.38	-0.3	-0.37	0.02	0.84	0	0.73	0.71	0.46	-0.2	0.64	1.34	0.97
NPHP4	-1.69	-1.47	-1.94	-1.76	-1.72	0.08	-0.57	0.42	0.33	0.05	0.77	0.58	1.03	1.59	-0.95	-0.01	0.78	0.44	-0.64	-0.99	-0.95	1.16	0.06	-0.27	-0.37	0.3	0.65	0.63	-0.07	0.47	0.46
PDCD10	-1.08	-3.22	-0.6	0.07	-1.72	-2.84	-13.04	-0.17	-2.26	-12.08	-2.86	-2.3	1.77	-3.59	-2.74	-5.7	1.46	-5.01	-3.05	-1.89	2.38	-5.05	1.34	-6.21	2.52	-6.61	-3.67	-2.7	-2.65	-7.6	0.87
PPP2R2B	0.23	-0.16	-0.44	-0.69	-1.72	0.14	-0.41	0.31	0.6	1.15	-0.42	-0.11	0.03	0	-0.57	1.12	-0.42	-0.72	0.03	-0.93	-0.91	1.17	0.02	0.4	-0.42	-0.07	0.26	-0.5	0.38	0.68	0.61
RNASEH2A	-2.72	-2.09	-3.27	-3.13	-1.72	-1.63	0.12	-2.14	-1.7	-1.17	-0.36	-6.33	-8.32	-4.14	-5.69	-1.79	-0.87	0.9	0.41	-0.69	-1.14	-4.22	-4.32	-3.71	-4.89	-5.33	-0.74	-6.29	-1.69	-9.13	-0.61
SLC18A1	-0.84	-0.78	-1.35	-2.63	-1.72	-0.88	0.34	-0.85	-0.76	-0.29	-1.28	-2.21	-0.28	-0.12	0.91	-0.68	-1.35	-0.12	0.17	0.52	1.6	0.03	-0.44	-0.28	0.3	-0.4	-0.12	0.65	-0.88	-0.84	-1.16
THAP8	-1.57	-0.43	-0.3	-1.39	-1.72	1.34	0.95	0.25	0.9	0	-0.08	0	-0.5	0.52	-0.95	-1.9	-0.44	-0.62	0.91	0.08	0.27	-1.15	-0.29	1.12	-0.54	0.54	0.15	0.33	-0.62	-0.22	-0.37
ZMAT3	-0.73	-2.91	-1.27	-1.35	-1.72	1.16	1.08	1.27	1.24	1.22	-0.06	0.01	0.65	0.47	0.51	-0.46	1.13	1.24	0.23	-1.04	-0.91	1.93	0.71	0.28	0.5	0.77	-1.1	-0.9	0.83	0.23	-0.43
ZNF200	-0.88	-1.17	-1.79	-1.59	-1.72	-1.19	-1.2	-1.63	-2.01	-0.33	1.08	0.22	1.6	-0.9	1.47	-1.26	-0.45	-1.36	-0.55	-1.29	-1.38	-0.04	0.5	0.75	0.01	-0.16	0.26	0.89	-1.1	-0.79	-0.09
FAM83H	-0.89	-0.28	-1.61	-0.09	-1.71	0	0.02	-0.07	-0.47	-1.25	1.16	0.22	0.58	0.28	-0.01	-0.53	0.62	-0.47	-0.33	-0.83	-1.06	-0.33	0.88	-0.24	-0.37	0.33	0.46	1.19	1	0.4	0.6
FN3KRP	-1.88	-0.18	-1.22	-1.29	-1.71	0.19	0.04	0.17	-0.01	0.31	0.9	1.18	-1.55	-0.66	-0.58	0.03	-0.08	0.12	0.99	-0.51	-0.76	0.59	1.71	0.42	0.58	0.2	1.61	0.39	0.57	-0.31	0.08
GALNT1	-1.76	-1.25	-2.54	-2.02	-1.71	-0.29	-1.16	-0.4	-0.09	-0.19	-0.68	-0.34	-0.84	-0.81	-1.14	-1.43	-0.82	-1	-1.2	-0.72	-1.51	-1.88	0.62	-0.27	0.83	0.98	1.79	-0.35	-2.35	-2.54	-2.55
HHEX	0.3	-1.14	0.38	-0.23	-1.71	-0.02	0.68	0.64	0.03	0.6	-0.76	-0.08	-0.82	0.57	-0.38	1.59	1.37	-0.46	-0.72	0.68	0.17	-0.31	-0.2	0.04	-0.19	-0.79	1.13	-1.09	0.4	0.31	0
MFSD11	-0.2	0.1	0.21	0.49	-1.71	0.09	-0.14	-1.02	-1.07	-1.26	-0.32	0	-0.67	1	0.67	0.28	0.72	0.23	0.26	-0.66	-0.79	-0.23	0.28	0.01	-0.08	-0.18	0.25	0.19	-0.46	0.71	1.31
RAD54L	-0.22	-2.67	-1.57	0.04	-1.71	-1.65	0.25	-0.48	-3.32	-0.75	-1.21	-1.78	-1.93	-2.47	-2.93	-0.44	-0.83	0.58	-0.41	-1.35	-1.06	-0.12	-4.76	0.38	-1.41	-4.12	-1.04	-6.78	-1.36	0.84	0.97
RALA	-0.32	-0.65	0.02	0.81	-1.71	1.41	-0.23	-0.39	0.81	-0.08	0.91	1.03	0.27	0.33	-0.76	0.1	-0.26	1.52	0.83	0.51	0.69	0.71	0.2	1.38	0.52	0.21	0.65	-0.29	0.6	0.36	-0.17
RPS6KA2	-1.47	-0.17	-0.31	-2.3	-1.71	-2.64	-1.75	0.48	-0.51	-0.49	-0.47	1.18	0.88	0.68	0.62	-1.04	-0.17	-0.79	-0.71	-0.55	-0.69	-0.4	-0.55	0.48	-0.72	-0.27	-0.65	1.31	-1.32	0.11	0.16
TTPAL	-0.91	-2.15	-0.82	-0.73	-1.71	-1.34	-1.07	-1.13	-1.66	-1.28	-1.75	0.36	0.12	0.46	-0.61	1.4	1.01	1.38	0.7	0.22	0.58	0.83	-1.09	0.12	0.72	-0.23	-0.13	-0.98	-0.55	0.02	-0.41
ZDHHC13	-1.09	-1.18	-0.98	-1.88	-1.71	1.28	0.73	1.31	1.11	1.66	0.18	-0.8	-0.02	-0.01	0.81	0.22	-0.83	-0.79	-0.66	-0.23	-0.39	-0.55	-0.54	0.53	-0.16	0.76	0.47	-0.48	-0.19	-0.49	1.3
AFTPH	-2.81	-1.31	-2.2	-2.26	-1.7	0.5	0.71	0.93	0.5	0.45	-0.87	0.31	0.01	0.32	-0.27	1.58	-0.99	0.17	0.05	-0.89	-1.19	-0.85	0.61	0.36	0.36	0.33	0.74	-0.77	-1.71	0.06	0.46
ARHGAP9	-0.48	0.35	-0.48	-1.42	-1.7	0.9	0.67	0.9	-0.04	0.96	-0.47	-0.66	0.03	-0.99	0.42	1.61	-0.13	-0.34	-1.52	-0.48	-0.86	-1.03	0	0	-0.3	-0.51	-0.58	-0.43	0.02	0.74	0.23
BEAN1	-0.52	0.54	0.75	-1.51	-1.7	-0.87	0.05	-0.6	-0.75	-0.57	-1.14	0.77	0.14	0.28	-0.83	0.1	0.17	-0.94	-0.63	0.29	0.39	-0.27	-0.62	-0.5	0.38	-0.51	-0.27	0.72	0.51	0.84	-0.08
CCDC77	0.2	0.47	-0.55	-0.5	-1.7	-1.58	-1.63	-0.9	-1.44	-0.62	0.31	0.18	-0.22	-0.58	0.83	-0.34	-0.35	-0.39	-0.2	-1.55	-1.12	0.85	-0.59	0.24	-0.07	-0.22	0.96	-0.03	-0.36	-0.25	0.97
CDSN	-0.19	1.45	1.69	0.72	-1.7	1.09	1.27	1.36	1.28	0.34	-0.72	-0.34	-1.89	-0.41	0.34	1.18	-0.63	0.45	0.22	1.09	-0.11	0.49	-0.47	-0.4	-0.5	-0.01	0.1	0.61	-0.25	-1.04	-1.7
CLDN3	-0.88	0.81	-0.57	-0.52	-1.7	1.91	1.86	1.1	0.08	0.12	-0.71	-0.14	-0.28	-0.9	-0.85	-0.97	0.61	-0.41	0.38	0.27	-0.41	1.88	0.42	0.34	-0.13	-0.1	0.47	0.13	-0.45	1.39	0.84
CPT1A	-0.93	1.03	-0.23	-0.06	-1.7	0.36	-0.96	0.71	0.99	-0.78	0.31	-0.38	-2.03	0.33	1.27	0.37	0.04	-0.37	-0.54	-1.46	-1.05	0.28	0.4	0.2	-0.03	-0.18	0.18	0.46	-0.66	-0.3	-0.27
FCRL3	-1.63	-0.1	-0.42	-1.22	-1.7	-0.7	-0.88	-0.37	-0.33	0.24	0.69	-0.23	-0.35	0.93	0.46	-0.02	0.69	0.98	0.21	1.33	0.3	0.85	-0.21	0.74	0	-0.1	-0.36	0.27	-0.69	-0.01	0.6
GOLPH3	-0.37	-2.18	-0.06	-0.22	-1.7	0.88	1.07	0.74	0.75	1.38	2	2.13	1.14	0.51	0.52	-0.38	1.46	0.07	-0.63	-0.2	0.99	0.88	2.15	0.39	0.44	0.32	0.59	0.2	1.25	0.12	0.93
PDE6B	0	-1.07	0.1	0.04	-1.7	0.96	-1.44	0.57	0.4	-0.57	-0.53	-0.7	-0.22	0.19	-0.12	-0.6	-0.36	0.27	-0.4	-0.54	0.15	-0.13	0.34	0.78	1.1	0.15	-0.63	1.11	-0.44	0.46	1.03
RBM28	-2	-0.62	-1.71	-1.47	-1.7	0.68	0.67	-0.01	-0.19	-1.23	-0.28	0.44	0.52	-0.7	1.1	-0.88	0.59	0.58	2.6	1.46	1.53	-0.92	-0.73	0.02	-1	-0.35	0.87	0.54	0.48	0.56	0.48
SGCE	-1.66	-1	-0.77	-1.05	-1.7	-0.4	0.72	0.92	-0.42	1.58	-0.02	-1.52	-0.83	-0.93	-0.07	-2.31	0.35	-1.07	-0.32	0.15	0.22	1.35	-0.26	-0.7	-0.57	-1.15	-1.59	0.01	-0.06	0.63	0.06
CCDC24	0.01	-0.99	0.38	1.15	-1.69	0.18	-0.4	-0.11	-0.74	-0.6	-0.81	-0.85	0.48	0.63	0.07	0.05	-1.93	-1.47	-0.62	-1.05	-1.29	0.77	1.31	-0.04	-0.4	-0.12	-0.51	-1.02	-1.03	-0.88	-1.11
FAM211A	-1.61	-0.1	-0.33	0.81	-1.69	2.42	2.11	1.76	2.11	1.99	1.66	0.96	0.09	-0.35	-0.28	-0.75	0.3	0.47	0.45	1.04	1.1	0.18	0.33	-0.31	1.51	1.48	0.14	-0.76	0.98	0.45	0
FGF23	-1.08	-0.99	-0.68	-1.34	-1.69	-0.37	0.75	2.82	0.56	0.72	-0.16	0.3	0.43	1.36	1.4	1.43	0.04	0.12	-0.31	-0.46	0.11	0.78	1.49	-0.29	0.69	0.4	0.71	1.07	0.89	0.93	-0.9
GPSM3	-1.97	-1.21	-2.06	-1.64	-1.69	-0.11	-0.18	-0.81	-0.68	-0.6	1.12	0.95	-1.23	0.96	0.89	0.26	-0.82	0.18	0.24	1.61	0.53	-0.92	0.5	0.31	-0.34	0.76	0.46	0.56	1.18	1.32	2.07
METTL13	-1.27	-0.92	-0.49	-0.21	-1.69	0.11	-0.18	-0.38	-0.31	-0.49	0.97	0.53	0.44	-1.03	-0.06	-0.91	0.58	-0.17	0.57	0.91	0.72	-1.24	0.88	-0.52	1.07	0.08	1.03	-0.84	0.33	-0.2	1.44
MMP8	-0.76	-0.15	-0.49	-0.53	-1.69	0.92	-0.02	0.53	0.26	1.12	1.23	1.57	0.09	-0.3	-0.44	0.65	-0.93	-0.96	0.16	-0.77	-1.29	-0.21	0.06	0.21	0.74	0.21	-0.01	0.24	-0.97	-1.17	-0.11
PDCL2	-0.03	-0.78	-0.66	-0.55	-1.69	-0.15	-0.92	-1.26	-0.23	-1.2	-0.29	-0.73	0.8	-0.78	-0.82	-0.13	-1.74	-0.9	-0.91	-0.17	-0.78	0.87	-0.53	-0.09	-0.28	0.59	-1.53	0.36	-0.83	-1.14	0.92
PLCB2	-0.03	-0.06	-0.17	1.88	-1.69	-1	-0.88	-1.24	-0.96	-0.38	-0.87	-0.17	0.17	0.59	-0.99	-1.46	0.31	-0.48	0.27	-0.42	-0.32	-1.83	-0.81	-0.18	-1.01	-0.02	0.01	-0.86	1.86	2.41	1.96
PRSS1	-1.07	-0.42	-0.5	-0.73	-1.69	0.6	-0.36	1.54	1.02	0.24	0.1	0.34	-0.91	-0.36	-0.22	0.3	0.97	-0.25	-0.03	-0.8	-0.3	-0.56	0.05	0.26	0.35	-0.06	-0.07	0.19	-0.48	0.1	-0.42
PUSL1	-0.43	-0.52	0.2	-1.26	-1.69	1.02	1.32	-0.2	1	0.62	-0.8	0.1	0.49	-1.28	0.86	1.32	0.44	0.39	-0.51	-0.33	-0.21	0.52	-0.35	-0.87	-0.06	0.15	-0.1	-1.27	0.39	-0.33	-0.42
RPS4Y2	-1.44	-0.86	-0.83	-1.32	-1.69	-0.47	0.72	-0.32	-0.74	-0.45	NA	NA	NA	NA	NA	0.21	NA	NA	NA	NA	NA	0.24	0.39	0.37	0.36	-0.19	-0.11	0.55	-2.96	-2.31	-1.02
SF1	-1.35	-0.91	-1.12	0.1	-1.69	-0.24	0.86	0.33	1.88	0.55	0.95	1.4	0.69	0.37	0.75	-0.17	-0.23	-0.43	0	1.3	-0.35	1.04	-0.75	-1.02	-0.55	-0.97	-1.79	-0.41	0.33	0.67	0.19
SKI	0.55	0.77	0.45	1.14	-1.69	0.87	0.63	-0.15	0.39	0	-2.12	1.43	0.46	-0.18	0.59	-0.75	-0.18	0.51	0.37	0.24	-0.25	0.41	0.59	-0.14	0.58	0.86	1.12	-0.51	-0.11	1.81	1.52
TAAR1	-0.26	-0.85	-0.76	-0.11	-1.69	-0.79	-1.08	-1.11	-1.52	-0.97	1.02	0.02	-0.44	-0.29	0.58	0.43	1.82	-0.01	0.2	-0.9	-0.81	0.19	0.59	0.24	0.69	-0.22	1.29	1.88	-0.64	1.04	-0.47
YIPF5	-0.94	0.66	-2.42	-0.66	-1.69	-0.82	0.84	-0.88	-0.68	0.27	-1.77	-1.79	-0.6	-0.23	-0.99	1.73	-2.36	0.13	-0.27	-0.95	-1.26	1.55	-1.53	-3.81	-0.46	-1.27	1.01	1.5	0.66	0.77	-0.71
ZNF503	-0.61	-0.54	-0.69	-0.39	-1.69	0.34	-0.66	-0.71	0.4	-0.72	0.69	1.13	1.41	1.22	0.21	-0.32	1.69	1.31	0.13	1.27	1.36	1.12	0.98	1.69	1.44	-0.58	1.6	-0.71	1.24	1.01	0.26
ANXA7	-0.67	-1.57	-1.43	-1.85	-1.68	-0.58	-2.06	-0.43	-1.69	-0.62	-0.99	-0.28	0	-0.26	0.23	0.04	1.36	1.28	-0.01	1.19	1.04	-2.78	0.95	-0.28	-0.11	-1.59	0.27	-0.63	0.07	0.22	-0.76
ARAP2	-1.79	-1.53	-0.84	-2.92	-1.68	0.04	-0.76	0.05	0.45	0.12	-0.84	-1.03	0.5	0.46	-0.9	-0.39	0.61	0.45	-0.38	-0.05	-0.11	0.04	-0.45	0.33	2	1.61	0.82	-0.38	-0.46	-0.26	1.03
CDKN2D	-1.66	-0.23	-1.02	-0.73	-1.68	0.77	1.89	0.61	2.02	0.23	-1.88	-0.78	-1.15	1.52	-0.14	0.56	0.26	0.91	0.19	-0.55	-0.28	-1.31	-0.67	-0.43	-0.94	0.12	-0.49	0.04	0.18	-0.12	0.54
CUL4A	-1.7	-0.52	-0.65	-1.05	-1.68	0.47	0.62	0.29	0.54	0.39	-2.37	0.36	0.78	-0.17	0.23	0.61	1.78	1.61	0.73	0.33	1.09	0.5	-0.46	1.28	0.8	0	-1.15	-0.49	0.27	-0.18	-0.52
DAGLB	0.26	-0.21	-0.19	-0.21	-1.68	-0.52	-0.67	0.18	0.6	-0.04	-2.03	-2.9	-0.75	0.32	0.06	0.57	-2.48	-1.46	-0.32	-0.78	-0.83	0.28	0.01	-0.28	-0.94	-1.36	-1.36	0.44	-0.61	-1.17	0.04
GZMM	-0.98	0.91	-1.98	-1.08	-1.68	-0.38	0.58	-1	-0.29	0.19	-0.23	1.13	0.39	0.85	0.31	0.82	0.2	0.53	-0.24	0.2	-0.26	-0.12	0.26	0.21	0.67	0.23	0.72	-1.14	0.27	0.34	-0.37
KCNMB1	-1.12	-0.11	-0.9	-0.79	-1.68	0.89	2.2	1.55	0.24	1.51	1.23	0.48	0.81	-1.85	0.53	0.43	-0.98	-1.44	-1.86	-1.74	-1.85	-0.39	0.82	0.3	-0.14	-0.25	-0.23	0.12	-1.07	-1.58	-1.19
KIF26B	-1.03	-1.03	-0.72	-0.35	-1.68	0.42	-0.8	-0.67	0.27	-1.02	0.6	0.94	0.01	0.45	0.28	-0.97	-1.03	0.26	-1.11	-0.66	-0.57	-0.77	0.27	0.29	0.25	0.63	0.61	-0.24	-0.05	0.07	0.3
LDLR	0.45	-0.84	0.86	-1.88	-1.68	-1.33	-0.94	-1.27	-1.56	-3.46	1.38	1.18	-0.09	0.36	1.06	-0.46	-0.8	0.49	0.35	0.42	-0.67	0.5	-0.04	-1.26	-0.23	-0.66	0.48	-0.42	-0.23	-2.56	0.31
MZF1	0.56	-1.2	-0.64	0.3	-1.68	0.07	0.87	-0.25	-0.61	-0.21	0.13	0.39	1.21	-0.84	-0.48	-0.77	-0.92	0.23	-0.33	0.43	-0.39	-0.59	-1.45	-0.12	0.33	0.78	-0.72	-1.27	1.4	0.77	0.79
NDN	-2.11	0.06	-2.24	-1.63	-1.68	-1.64	0.57	-1.34	0.47	-0.18	1.01	1.05	0.55	-0.49	0.62	-0.02	0.85	0.63	-0.21	-0.3	-1	1.6	-0.66	-0.66	-1.35	-0.22	0.97	-1.05	-0.04	0.25	0.05
NT5DC1	-0.56	-3.02	-0.89	-0.98	-1.68	-1.39	-0.51	-0.77	-0.96	-0.52	1.38	-0.1	0.9	0.16	0.64	0.7	-0.61	0.07	0.53	1.07	0.74	0.08	-0.14	0.07	-0.1	0.25	0.47	-0.49	0.32	1.77	0.64
PAX8	-2.86	-0.74	-2.81	-2.39	-1.68	0	0.81	-0.16	1.55	1.42	-0.82	0.44	-0.79	-0.34	-1.79	1.21	-1.92	-1.39	-0.25	-0.52	-0.79	-0.62	-0.09	0.05	-0.19	0.07	-2.14	-0.85	-0.54	-1.14	-0.77
PCDHB14	0.62	-1.08	-0.84	-0.86	-1.68	-0.3	-0.06	-0.63	-0.28	-0.34	-0.11	0.16	-0.31	1.85	-0.33	0.1	-1.51	-1.16	-0.11	0.56	-0.35	-1.54	0.38	0.51	0.04	0.43	1.57	0.72	0.88	0.39	1.15
RNMTL1	-1.79	-0.08	-2.88	-0.9	-1.68	-0.04	0.47	0.6	-1.13	1.41	0.92	0.86	-0.26	-0.58	0.21	-0.55	-0.76	1.14	-0.24	-1.21	-0.77	-0.38	0.46	-1.61	-0.47	-0.46	1.08	0.41	-1.66	-1.84	-1.98
RRAGC	-1.04	-1.36	-1.12	-1.27	-1.68	-1.78	0.31	-3.57	0.35	-3.96	1.91	1.99	2.71	0.76	1.8	1.37	-0.43	0.51	1.55	2.38	-0.08	-1.41	0.3	2.09	-2.89	1.06	-0.46	-1.63	2.31	-3.65	0.53
SIPA1L2	0.59	-1.98	-0.09	1.06	-1.68	-0.17	-0.26	-0.08	0.49	0.33	-0.31	0.2	0.85	0.4	0.5	1.15	0.69	1.1	0.73	0.43	0.39	1.02	0.97	0.83	0.3	1.16	1.47	0.43	-0.06	0.4	1.28
SLC1A4	0.12	-1.42	-1.75	-1.29	-1.68	-0.65	0.32	0.71	-0.6	0.91	-1.4	0.23	0.45	1.87	0.44	-0.01	-1.54	-0.44	-0.34	-1.08	-0.86	-0.2	0.54	-0.19	0.47	0.47	0.47	0.44	-1.27	-2.9	-0.45
SMIM11	-1.44	-0.14	-1.52	-1.28	-1.68	0.5	-0.33	0.29	-0.6	0.7	-1.63	0.12	0.08	0.18	0.38	-0.62	-0.47	0	-0.45	-0.9	-0.61	-0.31	1.01	0.53	0.15	0.95	0.44	-0.56	0.02	1.22	1.16
TM6SF2	-1.21	0.97	-1.37	-0.66	-1.68	-1.36	-1.12	-0.56	0.17	-0.85	0.58	1.05	-0.27	-0.65	0.53	0.36	-1.22	-0.17	-0.98	-0.76	-0.95	0.86	-0.87	-0.98	-0.38	0.19	0.65	0.71	0.74	0.32	-0.03
TSACC	-0.54	-0.54	-1.56	-1.86	-1.68	-0.8	-2.18	-0.7	-0.42	-0.01	0.78	0.91	-0.68	0.6	-1.05	-0.03	0.46	0.74	0.97	0.35	0.23	-1.09	0.43	0.71	0.7	1.26	0.85	-0.56	-0.5	-1.2	-0.67
TTC22	-0.81	-1.32	-1.29	-0.81	-1.68	-0.11	0.61	0.15	-1.46	-0.36	-1.22	-0.82	-1.04	-0.34	0.49	-0.03	1.01	0.56	-0.43	-0.35	-0.61	0.37	0.08	-0.14	-0.38	0.38	1.7	-0.39	-0.89	-0.1	-1.13
VSIG4	-1.31	-0.08	-1.64	-2.17	-1.68	-1.27	-0.72	-0.75	-1.13	-0.85	0.55	0.04	0.95	1.19	1.04	0.31	0.12	0.12	0.15	0.15	0.58	0.28	0.08	0.42	0.18	-0.2	0.09	-0.38	-0.4	0.85	0.33
YEATS4	-0.14	-1.02	-0.66	0.24	-1.68	-0.62	1.7	0.62	0.55	-0.46	-0.13	-1.85	1.36	-0.66	-1.27	-0.98	1.42	0.39	0.74	2.65	3.05	-0.6	0.25	-0.81	0.23	0.1	0.95	0.49	-0.29	-0.48	-1.61
ALDOC	-1.49	0.32	-0.87	-1.59	-1.67	1.04	-1.56	0.1	-0.28	-0.91	-0.01	-0.41	0.59	-0.36	-0.51	0.15	-2.36	-1.14	-1.28	-0.38	-0.02	-1.22	-0.92	-0.55	-1.36	-1.01	-0.48	-0.46	1.06	1.29	0.88
ATP6V0D2	-1	0.11	-0.71	-1.76	-1.67	-1.23	-1.32	-1.02	-2.04	-0.12	-0.13	0.02	0.85	0.48	0.41	0.05	-0.35	1.14	0.33	0.21	0.25	0.8	-0.02	0.01	0.16	0.91	-0.15	0.12	1	0.23	-0.64
CCDC87	1.26	-0.37	0.85	0.24	-1.67	0.92	1.14	-0.36	0.76	1.85	0.35	0.19	-0.44	1.87	1.01	-0.4	-0.65	-0.94	-0.43	-0.61	-0.56	-0.43	1.17	0.11	0.67	0.72	0.65	0.4	1.23	0.02	0.75
CCT8L2	-0.92	-0.25	-0.89	-1.16	-1.67	1.35	1.6	0.01	0.6	1.3	-0.73	0.06	-0.48	0.07	1.06	0.99	-0.4	-2.06	-0.4	-0.75	-0.81	-0.33	-0.28	0.4	-0.85	0.4	-0.19	0.49	0.08	0.29	0.34
H2AFY	-0.03	-0.76	0.76	0.39	-1.67	0.46	1.08	1.09	0.57	0.67	0.28	-0.31	0.82	0.19	0.04	0.59	0.27	-0.16	-0.82	-1.34	-1.25	0.6	0.64	-0.33	-0.17	0.89	0.3	0.07	1.23	-0.01	0.48
HIF3A	-0.07	-1.17	1.98	0.31	-1.67	-0.82	0.9	-0.41	-0.35	-1.07	0.86	0.9	0.14	0.57	-1.34	0.55	-0.4	-0.06	-0.37	0.86	0.82	-0.43	-0.92	-0.09	0.53	0.9	-1.2	-1.22	1.09	-0.65	1.02
ILDR2	-0.04	-1.25	-1.03	-0.01	-1.67	-0.35	0.44	-0.26	0.44	-0.74	-0.65	-0.87	-0.04	0.31	-0.13	-0.25	1.12	0.73	0.07	0.29	0.26	-0.25	-0.04	-0.58	-0.25	-1.36	-0.63	0.15	-0.61	-0.6	-0.1
KLC4	0.03	-0.77	0.63	-0.32	-1.67	-2.02	-0.34	-1.6	-0.34	-0.69	-1.13	0.6	0.41	1.2	0.22	-0.35	-0.78	0.67	0.5	0.45	-0.59	-1.15	-0.02	0.5	0.19	0.34	-0.56	-0.2	1.31	1.19	1.54
PPM1B	-1.06	-1.57	-1.72	-1.82	-1.67	-1.27	-0.89	-1.25	-1.94	-1.54	-1.49	-2.07	0.47	-0.36	-0.93	1.09	0.39	0.75	1.15	-0.43	-0.81	-0.9	0.41	-0.06	-0.26	-0.47	0.28	0.62	-1.65	-0.71	-1.15
RAB27B	-0.51	-1.82	-1.8	-0.44	-1.67	1.45	-0.4	-0.97	0.77	-0.22	-0.01	-0.28	0.2	-0.17	-0.33	1.13	-0.16	-0.48	-0.57	-1.13	0.01	0.23	0.59	0.65	0.1	0.46	0.97	0.54	-1.37	-0.36	-0.98
SLC8B1	-0.58	0.12	0.08	-0.08	-1.67	-2.13	-1.53	-1.43	-0.13	-1.04	0.06	-0.17	-0.16	0.67	-0.27	-0.63	-0.46	-0.77	-0.69	0.12	0.28	0.79	0.23	0.38	-0.05	-0.87	-0.26	-0.7	0.14	0.06	0.63
TP53BP2	-1.95	-2.24	-1.68	-1.47	-1.67	0.53	-0.61	-0.6	-0.49	0.85	-0.71	0.86	0.92	-0.02	0.79	0.54	-1.54	0.63	0.4	0.8	0	0.91	0.06	1.01	0.09	0.74	-0.41	-2.33	0.76	0.3	-0.41
YWHAG	-0.38	-0.37	-0.66	0.03	-1.67	-0.18	0.51	0.81	0.54	0.14	1.73	1.52	-1.69	0.3	1.1	0.79	-0.74	-1.41	-1.47	0.06	-0.53	1.52	0.19	0.46	1.17	0.55	1.84	1.01	0.15	-0.64	0.77
AGFG1	-1.26	-0.2	-1.86	-2.1	-1.66	-1.92	-2.94	-0.84	-0.93	-0.09	0.55	-0.02	-0.06	-0.17	-0.24	-0.01	0.1	0.73	0.01	0.22	-0.4	-0.51	-0.41	-1.84	0.37	-0.17	0.06	0.18	0.04	1.09	0.81
AMT	-1.01	-2.13	-0.73	-1.4	-1.66	1.45	0.16	0.41	0.98	0.13	-0.4	0.63	-0.84	0.68	0.4	0.21	0.02	-0.04	-0.03	0.15	0.54	1.37	1.34	0.64	0.95	0.14	-1.05	0.99	0.97	0.32	0.38
ARHGAP31	0.57	-0.29	-0.04	-0.34	-1.66	1.25	0.33	-0.53	-0.67	-0.78	-0.34	0.78	-0.97	0.36	0.97	-0.05	-0.27	-0.7	-0.93	-0.71	-1.12	-0.62	0.56	-0.47	0.06	-0.36	0.06	0.4	0.33	-0.78	-1.49
DNAH14	-0.29	-1.19	-0.08	-0.8	-1.66	-0.64	-0.96	0.56	-0.33	0.03	-0.66	-0.25	0.28	0.48	1.17	0.58	0.02	0.46	0.87	0.73	1.82	1.28	1.17	0.68	1.4	1.82	1.35	-1.57	1.65	0.96	1.75
HSD11B1L	0.17	1.02	-0.19	1.45	-1.66	-1.7	-0.03	-1.74	-0.63	-0.94	-0.27	0.09	1.8	0.12	-0.34	0.53	-0.67	0.21	-0.39	0.22	-0.03	1	-0.87	-0.02	-1.04	-0.37	0.35	0.31	0.6	-0.9	-0.04
ITGB1BP1	-0.73	-1.46	-1.57	-1.44	-1.66	0.11	-0.44	-0.09	-1.5	-3.96	-1.08	-1.63	0.96	0.06	0.22	0.85	1.86	-1.81	-0.53	-0.66	0.19	-1.11	1.04	-1.64	0.77	-1.08	0.13	-1.66	0.39	-2.32	0.38
KRTAP17-1	-1.39	-0.11	-1.92	-1.13	-1.66	1.49	0.65	1.35	1.49	1.22	-1.41	0.17	-0.98	0.82	-0.19	-0.9	0.29	-0.84	-0.76	-0.05	-0.1	-0.18	0.24	0.33	0.81	0.11	-0.59	-0.9	-0.97	0.87	-0.32
KRTAP6-3	-0.23	-1.37	0.22	0.55	-1.66	-0.18	-0.35	1.6	1.34	1.32	0.13	0.82	-0.77	0.55	1.24	1.43	1.02	-0.71	-0.33	-1.08	-1.16	-1.54	0.94	0.27	-1.03	-0.24	-0.14	0.55	-0.94	-0.33	-1.47
MRPL51	-1.12	-1.25	-1.3	-1	-1.66	0.71	1.96	1.06	-0.86	1.35	2.87	1.57	0.38	0.34	0.67	-0.49	1.1	-0.74	0.72	0.86	1.05	-1.32	0.34	-0.35	1.87	0.69	1.02	0.8	-0.7	1.53	0.3
OR6B3	-1.19	-0.97	-0.45	-1.54	-1.66	0	-1.65	-0.2	-0.07	0.18	-0.83	0.37	0.67	-0.93	0.58	-0.68	1.8	0.14	-0.92	-0.39	-0.53	0.01	-0.83	0.23	0.01	0.37	0.06	-0.22	0.35	0.42	0.6
PAGR1	-0.56	-1.48	-0.15	0.21	-1.66	-3.21	0.74	-1.8	-0.21	-2.9	0.83	-0.2	0.89	-1.03	-0.83	-1.64	0.92	1.36	-0.45	-1.71	-1.94	-0.93	-2.55	0.83	-4.48	-0.32	0.23	-3.34	-0.16	-0.67	-0.27
PPFIBP1	-0.24	-1.02	-1.59	-0.3	-1.66	0.08	-0.05	-1.13	-0.05	-0.48	-1.15	1.25	1.03	-0.42	0.84	0.05	0.67	0.97	-0.08	-0.09	1.08	-0.26	0.78	0.87	1.16	2.46	1.81	-0.34	1.07	0.12	-0.44
SH2D4A	0.42	0.18	-1.85	-0.27	-1.66	-0.54	-1.16	-1.16	-0.06	-0.39	1.08	0.88	-1.1	0.54	1.43	1.4	1.19	1.07	-0.09	0.08	-0.11	0.54	-0.96	-0.04	-1.27	-1.13	1.27	0.46	-0.34	-0.15	-0.91
SLC39A6	-2.87	-1.39	-1.79	-1.86	-1.66	0.8	-0.15	-0.47	-0.09	0.9	0	0.9	-0.36	-0.01	-0.37	0.4	-0.02	0.21	-0.66	-1.2	-0.89	0.1	-0.43	-0.32	-0.31	-0.28	-0.43	0.85	-0.27	0.52	-0.03
ACAN	-2.27	-0.75	-0.35	-2.25	-1.65	-2.1	0.81	0.04	-0.41	0.66	-2.02	-1.29	0.3	-0.04	-0.44	-1.52	-0.8	0.36	-0.32	-0.2	0.15	1.22	-0.49	-0.24	-0.57	-0.19	0.82	0.26	-0.93	0.27	0.48
AMMECR1	-0.77	0.81	0.25	-1.18	-1.65	1.72	0.23	1.11	1.76	0.45	-0.29	0.59	-0.09	0.72	0.5	0.04	-0.74	0.23	-0.72	-0.23	0.18	0.38	-0.31	-0.01	0.33	-0.45	0.01	1.21	0.07	-0.24	0.86
ARHGEF10L	-1.21	-1.76	-2.55	-2.27	-1.65	0.69	0.46	1.84	0.65	0	-0.05	-0.29	-0.48	0.32	-0.17	0.38	-0.01	-0.33	0.43	0.01	-0.27	1.06	0.44	-0.01	0.76	0.09	0.4	0.2	0.4	-1.08	-0.22
BRMS1	2.19	-0.81	0.86	1.31	-1.65	0.5	0.04	0.79	0.55	-0.91	-0.05	0.18	-0.63	0.99	0.8	-0.97	-3.41	-1.35	-2.94	-0.87	-0.81	-0.2	-0.79	-0.57	-0.14	-1.01	-1.18	0.15	0.31	-0.11	0.4
CPA3	-0.35	-1.06	-1.9	-1.27	-1.65	0.23	-1.01	1.5	1.24	0.22	-0.38	-0.86	-1.11	-0.04	-0.07	0.38	0.79	1.88	0.67	0.34	1.05	1.14	0.43	0.36	0.34	0.63	0.67	-0.06	0.83	-0.24	-0.01
DGKB	-1.12	-1.04	-0.6	-1.07	-1.65	-0.17	1.04	1.75	0.68	1.46	1.76	-0.32	-0.13	-0.6	0.93	-0.31	1.85	1.1	0.18	-0.36	-0.5	0.3	0.35	0.33	-0.08	0.42	-0.79	0.08	-2.08	-0.22	0.14
HOMER1	-2.33	0.12	-1.88	-1.78	-1.65	0.48	0.79	1.3	0.95	0.88	-0.35	-0.52	0.18	1.61	-0.58	1.34	-0.25	0.62	-0.46	-0.39	0.17	-0.44	0.26	0.16	0.13	0.45	0.25	0.18	0.55	0.4	1.54
IGDCC4	0.06	0.09	-0.78	0.9	-1.65	0.57	0.63	-0.62	0.75	-0.75	-1.37	-1.75	-0.35	-1.35	-0.82	0.1	1.77	0.21	0.18	-0.05	0.69	0.04	0.33	-0.98	-0.39	-0.58	-0.22	-2.35	0.13	0.53	1.04
MAP1LC3C	-0.97	-0.25	-1.42	-2.01	-1.65	1.25	-0.52	0.56	1.38	1.06	-0.57	-0.47	0.57	0.1	-0.49	-0.73	0.02	-0.11	0.12	-0.98	-1.41	-1.21	0.44	-0.3	-0.76	-0.77	-0.01	-0.29	1	-0.27	0.87
NAV1	-1.9	-1.08	-0.46	-2.4	-1.65	-0.22	-0.35	0.09	-0.96	-0.11	1.86	2.18	-0.56	0.91	0.04	0.85	-0.58	0.19	-0.81	-1.01	-0.91	0.18	-0.29	-1.18	-1.24	0	1.11	0.2	0.45	0.86	1.48
OPHN1	-1.02	-2.69	-1.39	-1.96	-1.65	-0.21	-0.61	0.11	-0.41	-0.19	0.01	-1.69	0.89	0.64	-0.32	-1.75	-0.63	0.37	-0.19	-0.46	-0.07	-0.34	0.12	0.07	0.84	1.22	0.85	0.81	-0.35	-0.27	0.5
PAEP	-0.4	-2.19	-1.61	-0.94	-1.65	-0.3	-0.45	0.2	0.3	-0.07	-0.26	-0.71	-0.91	-0.63	-0.32	0.52	0.63	0.14	0.4	-0.29	-0.1	-0.47	1.08	-0.26	-0.31	-0.89	-0.2	0.63	0.73	-0.05	1.62
PMCH	-0.68	-1.17	-1.01	-0.54	-1.65	-1.06	-1.95	-1.24	-0.91	-0.53	0.19	0.11	-0.38	0.44	0.66	-0.23	-1.43	-1.16	0.15	-0.45	0.13	-0.3	0.45	-0.28	0.12	1.07	1.45	0.1	-0.9	0.23	-0.65
SBK2	-1.16	0.1	0.85	0.12	-1.65	0.03	0.21	-0.43	0.38	0.19	-0.01	-0.17	-0.64	0.2	1.15	1.34	-0.24	-0.56	-0.4	-0.17	0.26	-0.16	1.34	0.65	0.32	0.77	0.61	-1.85	-0.03	-0.61	-0.12
SPATA13	-1.24	-1.37	-1.98	-1.61	-1.65	-0.18	0.03	0.09	-0.58	-1.98	1.44	0.91	2.24	-0.22	-0.24	-0.91	1.21	1	0.97	1.19	0.81	1.1	0.82	-0.53	1.39	-0.09	0.65	-0.95	-0.72	-1.47	-0.39
STAMBPL1	0.86	0.84	0.87	0.49	-1.65	-0.64	-0.38	1.21	0.11	0.09	-1.67	-1.43	0.68	-0.18	0.37	-1.67	0.62	0.42	-0.43	-0.12	-0.48	0.61	0.35	0.7	-0.17	-0.03	0.06	0.67	-0.7	-0.47	-0.43
TIMM44	-2.92	-2.84	-2.32	-2.13	-1.65	0.19	-1.85	-0.13	-0.77	-0.76	0.76	0.32	-1.68	0.25	1.17	2.23	0.94	-0.04	2.28	2.42	2.57	-1.41	0.17	0.24	0.67	0.54	0.82	0.42	-0.68	1.36	0.84
TNFRSF12A	-2.01	-0.49	-1.01	-2.35	-1.65	-1.19	1.06	0.52	-0.12	-0.05	1	1.09	1.12	-0.86	0.15	0.7	0.79	1.91	0.12	0.43	0.22	-1.26	-0.29	0.31	0.84	0.38	-0.51	-0.71	1.34	0.17	-0.75
TSC22D1	-1.43	-0.09	-0.87	-0.37	-1.65	0.3	1.14	1.39	0.73	-0.98	-1.27	-0.14	-0.09	0.01	-0.6	0.34	-0.19	0.42	-0.97	-0.47	0.13	-1.87	1.06	0.01	1.45	-0.2	0.18	1.95	-0.68	-0.9	-1.32
ZNF672	-1.41	-0.74	0.49	-0.71	-1.65	-0.03	0.17	-0.23	0.66	-0.14	-1.61	-0.35	-0.79	0.97	-0.37	2.37	1.59	-2.31	-1.76	-0.19	-0.77	2.4	0.44	-0.79	-0.2	-0.71	-0.75	0.02	1.74	1.33	0.53
ADAMTS8	-2.41	-1.81	-0.92	-1.93	-1.64	-0.11	-0.08	0.25	0.05	0.58	-0.23	1.25	1.58	0.27	-0.1	0.43	-0.48	-0.18	-1.11	-1.52	-1.18	0.71	0.76	-0.1	0.5	0.36	0.9	-0.28	0.57	0.63	0.91
C5orf49	-0.11	-1.62	-0.32	0.14	-1.64	-0.28	0.64	-0.63	0.34	0.06	0.71	2.13	0.84	-0.04	-0.21	-2.73	-0.9	-2.11	-0.74	0.23	-1.51	0.38	1.43	-0.08	1.01	1.03	1.55	-0.24	1.79	0.82	1.21
CABLES2	-1.59	-1.18	-1.23	-2.74	-1.64	0.3	1.39	2.04	0.93	0.23	-1.3	0.34	0.37	-0.25	0.72	0.51	1.43	0.96	0.21	0.25	0.73	1.27	-0.85	-0.51	-0.25	-0.95	-1.53	-0.76	0.3	-0.73	-0.77
CD3D	-1.02	-0.06	-1.02	-1.28	-1.64	0.36	0.9	0.12	0.12	0.41	2.17	1.57	1.19	0.52	0.44	0.86	0.05	-0.34	-0.54	0.6	-0.12	1.22	0.06	-0.18	0.02	-0.06	-0.4	0.33	0.29	0.39	-0.34
CLEC4E	-1.1	-1.8	-1.13	-2.05	-1.64	-1.11	-1.07	-0.73	-0.32	-1.09	-0.68	0.66	0.85	0.16	-1.41	-0.3	-0.47	0.25	-1.08	-1.32	-1.49	0.32	0.37	0.25	0.03	-0.43	1.61	-0.68	-0.81	0.82	1.61
GID4	-0.14	-0.82	-1.39	-2.36	-1.64	1.02	-1.17	-0.95	0.62	0.19	-0.94	-0.56	0.16	1.05	-0.51	0.64	0.1	0.21	-0.63	-0.16	0.07	0.26	-0.56	-0.48	-0.02	-1.12	-1.4	-0.94	-1.27	-0.5	-0.91
KIAA1614	-1.76	0.32	-0.35	-0.18	-1.64	1.18	0.04	0.37	1.08	0.49	1.01	-0.06	0.25	-1.74	0.23	0.88	0.55	1.87	0.84	0.56	0.2	0.7	-0.31	-0.34	0.03	-0.16	-0.12	0.87	-1.95	-0.89	-0.77
MAML1	0.02	0.26	0.31	0.13	-1.64	-0.65	-0.04	-0.84	-0.88	-0.99	0.04	0.81	0.48	-0.26	0.91	0.13	0.36	0.27	-0.74	-0.5	-0.52	-2.62	0.27	0.2	0.24	0.23	1	-0.32	2.74	1.27	2.44
OR5AP2	-0.89	-0.7	-1.26	-0.89	-1.64	-1.08	-1.45	-0.84	0.13	-1.06	-0.17	-0.94	-0.9	1.08	0.94	1.15	1.68	0.51	0.35	0.47	1.24	-0.38	0.31	-0.44	-0.02	0.69	-0.8	-0.75	-0.03	-1.51	1.01
PCBP1	-3	-2.29	-2.26	-1.15	-1.64	1.12	2.65	-0.33	2.57	-0.87	0.22	0.35	-0.83	-1.48	-0.35	-1.82	0.58	-1.34	-0.7	0.01	0.28	-1.71	0.47	-1.89	-3.02	-2.51	-3.39	-3.74	-0.25	-0.84	-1.9
POLR2D	-2.01	-0.12	-2.09	0.41	-1.64	0.82	0.44	-0.06	-0.52	-1.05	-0.5	-1.18	-0.43	-0.7	-0.95	NA	0.05	0.2	0.49	1.58	1.56	-0.49	-0.66	-0.82	0.31	0.26	0.79	0.27	1	1.29	1
RIMKLB	-1.98	-1.94	-1.58	-2.5	-1.64	0.18	0.66	0.76	0.11	0.92	0.53	0.43	-0.87	-0.04	0	-2.55	-0.18	0.38	-0.03	0.25	0.28	1.49	-0.64	1.06	1.11	-1.07	-1.32	-0.03	-1.11	-0.3	-0.76
RPP25L	-3.22	-0.51	-2.55	-0.63	-1.64	0	-1.35	-0.9	-2.09	-0.12	1.26	1.78	-0.09	1.45	0.17	-0.81	1.92	1.83	2.62	3.01	3.52	2.05	1.26	2.38	0.56	1.46	1.08	1.17	2.43	1.42	1.1
ST3GAL6	0.08	-1.92	-0.78	-0.49	-1.64	-0.66	-1.37	-1.75	-0.58	0.08	1.48	0.58	0.29	-0.31	-0.4	-1.13	1.68	2.46	1.68	0.84	0.22	0.49	-0.29	0.93	-0.2	0.95	0.95	1.15	0.24	-0.24	1.17
TFE3	-0.64	0.51	0	0.36	-1.64	0.99	1.2	1.56	0.33	0.27	0.07	0.8	-0.08	-0.37	0.98	-1.46	0.14	-0.05	-0.81	-0.55	-0.35	-0.45	0.72	0.12	0.53	-1.48	-0.36	-0.48	0.02	0.23	0.84
AIFM3	0.15	0.11	-0.16	0.3	-1.63	1.11	-0.19	0.07	-0.06	0.02	1.86	2.26	-0.09	0.18	0.36	1.33	0.97	-0.12	0.06	-0.07	-0.06	0.83	1.4	0.02	1.03	-1	-0.04	-0.17	0.65	1.46	0.53
BAG1	-0.45	-1.32	-0.93	-1.36	-1.63	-2.19	-0.93	-0.74	-1.84	0.06	0.09	0.46	0.17	0.87	1.69	0.34	0.47	1.25	1.3	0.37	0.77	-1.3	-0.91	-0.09	0.08	0.55	0.25	-0.98	1.23	0.7	0.64
CREG2	-0.94	-1.26	0.22	-0.23	-1.63	-0.13	-0.66	-1.04	-0.23	0.73	0	1.15	1.31	-0.16	-0.22	-2.35	0.86	-0.67	0	0.35	1.05	0.4	-0.67	-0.65	-0.43	-0.35	-1.26	-0.34	2.05	0.6	1.22
FAM208A	-1.48	-2.35	-0.46	0.16	-1.63	1.26	-0.3	0.47	0.06	0.32	-1.44	0.06	0.21	-1.14	-0.3	0.33	-0.96	-0.36	0.49	-0.46	-0.03	0.24	0.42	-1.11	-0.09	-0.47	0.34	-1.83	-0.35	1.94	0.97
HAND1	-0.87	0.53	-0.72	-0.49	-1.63	1.72	0.11	-0.36	1.04	0.77	-0.46	0.87	0.96	-0.16	0.45	0.55	-0.69	-0.52	-0.45	-0.54	0.21	-1.31	0.76	-0.29	0.21	0.23	0.64	0.92	-1.28	-1.3	-1.59
IRAK1	-0.44	-0.34	-1.48	-1.17	-1.63	0.46	-0.21	0.01	-0.06	0.81	-0.96	-0.33	0.3	0.59	-0.06	-0.03	0.28	1.25	-0.38	-0.17	0.05	-1.26	-0.14	-0.09	0.45	-0.42	-0.93	-0.38	1.23	0.06	-0.61
JAKMIP2	-1	-0.2	-0.82	-2.18	-1.63	-0.55	-1.11	-0.12	-1.11	0.09	-1.4	-2.36	-0.43	0.74	0.31	-0.49	-1.53	-0.06	-0.47	-1.09	-0.45	0.86	0.65	0.35	-0.29	-0.68	0.48	0.85	-0.77	-0.76	-0.3
MAVS	-0.54	-1.27	-0.61	-0.14	-1.63	-0.24	-0.73	0.42	-0.79	-1.08	-0.23	-0.17	-0.22	-0.43	0.37	-1.25	0.55	-0.16	0.02	-0.18	-0.37	0.04	0.16	0.56	0.12	0.33	1.09	-0.75	-0.44	0.08	-0.42
MRRF	-0.32	-1.69	-0.44	-0.79	-1.63	0.69	-0.88	0.35	0.58	0.28	1.01	-0.78	-0.12	0.1	-0.49	-0.41	1.39	1.47	1.81	0.48	-0.3	-0.96	-0.72	1.44	0.89	-0.62	-0.79	-0.11	-0.68	-0.46	-0.21
PHF17	-0.68	-1.28	-1.28	-1.69	-1.63	-1.09	-2.39	-0.88	-0.59	-0.47	0.92	0.31	1.64	-0.89	-0.78	-0.37	0.36	0.15	-0.37	-1.12	-0.43	-1	-1.05	0.5	-1.07	0	-0.83	-0.54	0.31	-0.35	0.08
RC3H1	-2.49	0.42	-1.9	-1.48	-1.63	-0.27	0.9	1.38	0.28	0.18	-0.97	0.8	-0.27	-1.13	-1.39	2.09	0.32	-1.47	0.46	0.24	0.54	-0.48	-1.12	1.71	-0.48	-1.14	-0.18	-1.45	0.48	1.22	-0.04
RNASE2	0.06	-0.12	0.11	-0.27	-1.63	-0.09	-0.05	-0.39	0.33	0.3	0.3	-1.21	0.39	-0.33	-0.8	-1.06	-1.16	0.1	-0.06	-0.28	0.59	-0.11	-0.07	-0.52	0.74	0.38	-0.81	-1.42	-0.22	-0.99	0.37
SCLT1	0.47	-1.29	-0.66	-1.24	-1.63	-2.03	-2.97	-0.98	-1.46	-1.91	1.04	-0.69	-0.27	-0.51	0.37	0.15	-1.24	-0.18	1.69	0.16	0.26	-0.16	0.68	2.07	0.12	0.07	0.83	0.3	-1.99	0.73	-0.27
SH3BGRL2	0.15	-1.12	0.97	-0.74	-1.63	-0.13	-0.43	0.13	-0.08	-0.58	0.87	-0.28	1.02	1.77	-0.72	0.19	1.33	0.23	0.44	1.16	1.36	-2.04	0.69	0.41	0.36	0.67	0.05	0	0.86	0.92	0.87
SPATA2	-0.78	-0.03	-1.4	-0.72	-1.63	0.11	-0.03	-0.21	0.2	-1.16	0.69	1.09	0.02	-0.23	0.37	-0.99	1.83	-0.67	0.3	-0.62	0.35	0.97	1.28	-0.99	0.96	-0.02	0.25	-1.32	0.03	0.85	0.34
SPPL2A	-0.08	-0.33	-0.07	-0.46	-1.63	-1.08	-0.8	-0.81	-0.53	-0.01	-0.82	-1.91	0.32	0.02	-1.19	-0.73	0.38	0.16	0.01	-0.96	-0.31	1.25	-0.33	-0.38	-1.25	0.09	0	-0.06	0.38	1.2	1.7
STRIP2	-0.82	0.15	-1.28	-0.81	-1.63	-0.54	0.04	0.78	1.5	1.14	-1.34	0.68	-1.34	-0.42	0.16	-0.55	1.64	1.07	-0.29	-0.5	0.28	0.73	-0.73	0.08	0.08	-0.12	0.98	0.7	1.14	1.32	0.08
TMED9	0.47	-0.04	0.5	1.25	-1.63	1.5	1.16	0.16	2.63	0.21	0.05	0.22	1.74	0.49	0.23	0.03	0.91	0.57	-0.51	0.17	1.1	0.45	3.25	0.05	-0.01	0.46	0.41	1.19	-0.67	-0.12	-1.07
TRAPPC4	-1.05	-2.07	NA	NA	-1.63	-0.89	-0.25	-1.17	-0.01	-0.09	1.52	-0.56	0.03	-0.86	0.89	-0.2	2.02	0.84	0.75	0.67	0.7	1.47	-0.05	-0.91	-0.48	-0.77	-0.61	-0.48	-0.26	0.72	-0.54
TTC19	-1.57	-1.57	-0.83	-0.75	-1.63	-0.49	0.17	-0.43	0.4	-0.49	-0.03	-0.09	-1	-0.27	-0.26	-1.51	-0.52	0.73	-0.74	-0.53	0.42	1.37	0.25	0.15	-0.1	-0.2	-0.59	-0.03	1.39	1.32	0.87
ZNF630	-0.59	-0.61	-1.25	-1.51	-1.63	-1.74	-2.59	-0.93	-0.92	-0.69	-0.28	-0.63	-2.31	0.14	-0.06	-0.09	1.38	1.94	-0.49	-0.05	-1.17	-2.29	-0.5	-0.91	-0.59	-0.22	-0.14	-0.4	0.04	0.21	-1.02
APOOL	-0.54	-0.85	-1.54	-1.21	-1.62	-0.18	-0.95	0.52	0.12	-0.14	0.58	0	0.87	0.47	0.12	-0.59	0.57	0.83	-0.92	-0.64	-0.88	-0.97	0.72	0.25	-1.25	-0.37	-1.26	-0.05	1.87	1.59	2.04
AQPEP	-1.55	-0.95	-1.59	-1.41	-1.62	-0.88	0.24	0.51	-0.73	0.52	-0.72	-0.54	0	0.74	-2.72	-1.21	0.32	0.44	-0.04	-0.41	0.16	0.45	-0.04	-0.41	0.05	0.07	-0.1	1.07	0.82	0.4	0.71
BAIAP2L1	-1.54	-1.06	-0.15	-1.02	-1.62	-0.89	0.03	-0.63	0.17	-0.38	-0.68	0.34	-0.45	0.07	-0.45	1.52	-0.18	-1.22	0.09	0.15	0.35	-1.11	0.07	1.11	0.25	0.75	-0.88	0.23	-1.6	-0.34	-1.09
C16orf80	-1.07	0.33	0.43	-1.47	-1.62	1.81	-1.09	-3.72	2.68	-3.89	0.14	0.25	-8.57	-1.6	-2.43	2.52	-0.01	0.69	-0.38	0.35	0.37	-1.29	-1.99	-1.34	-3.47	-3.09	-6.21	0.43	-2.21	-1.52	-4.79
C3orf83	1.26	-2.66	-0.57	-0.48	-1.62	-0.61	0.23	0.13	-0.2	0.59	-1.1	-1.19	-0.15	-0.25	-0.66	-1.31	0.3	0.28	-0.16	0.52	1.25	0	0.34	1.13	0.29	0.77	2.08	-0.13	-0.11	-0.01	1.15
C5orf28	-0.97	-1.07	-1.58	-2.08	-1.62	0.27	-0.43	0.29	1.09	0.75	0.61	-1.25	-1.66	-0.64	0.34	-0.12	0.97	0.77	0.2	0.1	1.23	-0.53	-0.4	-0.37	0.28	0.82	-0.86	0.7	-1.32	-1.04	-1.8
CDC7	-1.5	-2.1	-1.09	-0.73	-1.62	-0.84	0.46	0.01	-0.26	-0.45	-1.32	-1.49	-0.62	-0.58	-0.93	0	0.89	1.54	0.21	0.43	0.09	-0.97	0.58	1.94	0.64	1.29	0.55	-1.73	-0.25	0.41	-0.43
DKK1	-0.98	-0.29	-0.15	-0.48	-1.62	-1.09	-0.34	-1.07	-0.23	-0.45	-0.18	-0.55	-0.34	1.26	0.76	0.04	0.28	0.76	-0.12	0.68	-0.38	0.24	0.74	0.6	0.81	-0.62	0.26	-0.25	-0.76	-1.04	-0.94
FBXL18	-0.67	1.5	-1.8	-0.46	-1.62	-1.52	0.21	2.02	-0.16	-0.24	-0.38	-0.64	-0.85	1.37	-0.01	0.33	-0.42	0.05	-0.19	0.14	0.35	-1.04	0.21	-0.5	1.35	-2.02	0.51	0.16	0.86	-1.08	-1.34
ITGA9	-1.33	-2.56	-1.45	-1.98	-1.62	0.06	0.7	-0.18	0.08	0.51	0.71	0.42	0.27	-1.01	-0.06	-0.55	0.41	0.63	-0.6	0.5	1.52	0.58	0.46	-0.31	1.56	0.99	1.03	-0.57	1.65	0.29	0.76
ITIH3	-0.3	0.08	0.83	-1.04	-1.62	0.76	1.02	1.16	1.14	1.27	0.34	0.24	0.28	1.39	0.53	-1.16	0.13	-0.08	-0.37	0.32	-0.82	0.62	1.08	-0.11	0.34	0.67	0.92	0.12	1.33	2.1	0.9
KLF16	0.61	-1.22	0.1	-0.24	-1.62	0.28	-2.17	-2.69	-1.66	-1.92	-2.3	-0.08	2.28	-1.96	-0.97	0.52	-0.79	1.61	1.64	1.48	1.91	-0.31	-0.17	-0.82	0.94	-0.59	0.59	-0.38	-0.21	1.02	-0.5
LIN54	0.74	-0.07	1.56	1.81	-1.62	-0.14	0.9	0.97	1.53	0.41	-0.08	0.24	4.28	-0.62	-1.29	-0.97	-0.69	-0.75	-0.37	0.79	1	0.61	-0.44	1.29	0.05	-0.74	0.27	-1.73	-1.01	-0.33	-0.33
SEPSECS	-2.46	-0.14	-0.98	-0.65	-1.62	2.65	-0.55	1.24	0.68	-0.58	0.93	1.29	-0.7	-0.4	-0.09	-0.89	0.18	-1.09	0.59	0.79	0.63	0.21	0.63	1.16	-1.37	1.08	1.16	1.5	-1	-3.14	0.32
TSEN54	-1.56	-0.79	-0.51	-2.28	-1.62	-1.83	0.13	0.71	-0.71	-0.87	0.35	0.52	-1.43	0.31	-0.28	-1.17	2.16	1.32	2.66	3.83	3.63	0.34	0.79	1.04	-0.26	1.02	-0.07	0.68	0.03	0.86	0.28
C15orf57	-0.39	-0.25	-1.33	-0.7	-1.61	-1.77	-1.06	-2.11	-0.84	-0.02	-1.52	-0.81	0.78	-0.66	-0.38	0.67	0.42	0.92	0.26	-1.45	-1.03	1.2	0.36	-0.61	-1.05	-0.13	0.7	0.55	-1.36	-0.61	-0.69
CCDC37	-2.36	-0.9	-2.63	-2.04	-1.61	-0.51	1.06	-0.49	-0.84	0.63	0.3	-0.51	-0.09	-0.18	0.87	-0.16	-0.12	0.07	0.19	0.23	-1.26	-0.23	0.03	-0.54	-0.35	-0.4	0.72	0.75	-1.87	-0.45	0.29
CEACAM21	-0.53	-0.29	-0.11	-0.33	-1.61	-0.56	-0.83	-0.24	0.19	-0.5	-0.93	-1.62	0.54	-0.94	0.82	1.02	-0.31	0.56	0.53	-0.14	0.42	-0.01	-0.29	1.36	-0.25	1.01	-0.35	-0.26	0.52	0.29	-0.22
CNBD2	-0.86	-0.36	-0.85	-1.23	-1.61	0.1	-0.69	-1.37	-0.85	-0.68	-0.49	-0.07	-0.45	1.02	1.01	-0.96	-0.4	1.08	0.26	0.17	-0.43	1.62	-0.03	0.48	-0.18	0.57	1.15	0.24	0.11	0.93	0.73
EPB41L1	-1.73	-1.84	-0.98	-1.56	-1.61	0.29	0.14	0.41	-0.33	0.95	1.37	0.58	-0.03	-0.96	-0.1	-2.75	-0.92	0.3	-0.5	0.23	0.74	0.81	-0.32	-0.63	1.14	0.07	0.17	0.53	-1.56	-0.61	-0.61
EPHA1	-0.59	-0.52	0.1	-0.21	-1.61	-0.56	1.49	0.49	-0.19	1	-0.2	-1.5	1.66	-0.74	-0.91	0.98	0.54	-1.03	-0.56	-0.13	0.23	2.1	-0.18	-0.37	-0.13	-0.9	-0.71	-0.8	0.95	1.6	1.04
G6PC3	0.34	-0.35	0.19	-0.3	-1.61	0.84	0.7	-0.77	0.35	0.17	-1.7	-1.51	-0.48	0.02	-0.01	0.44	1.58	0.56	-0.28	0.49	0.51	-0.22	0.87	-0.13	0.99	1.12	1.12	-0.51	1.24	0.25	0.4
GAS2L2	-0.87	-2.5	0.35	-0.55	-1.61	0.55	0.26	-0.82	0.22	-0.09	-0.59	-1.37	0.91	-0.21	0.44	0.46	0.38	-1.09	-0.17	-0.35	0.74	0.9	0.49	-1.25	0.02	-1.67	-0.74	-2.13	-0.68	0.21	0.2
HIST1H3A	-1.62	-0.4	-1.56	-0.94	-1.61	0.09	2.16	1.74	0.75	0.98	-0.2	-0.52	-1.61	1.6	-0.06	-0.89	-0.77	0.98	0.24	0.17	-0.64	0.22	-0.88	0.09	-0.14	0.12	-0.88	-0.43	0.84	0.14	-0.06
HOXA6	0.89	1.07	0.93	0.46	-1.61	-0.09	-1.45	0.92	0.02	0.21	0	-0.49	-0.16	0.05	1.03	-0.19	0.02	-1.09	-0.41	0.72	0.05	-0.25	-0.11	-0.54	0.52	-1.37	-0.43	-0.09	-1.45	0.03	-0.7
HRH4	-0.58	-1.96	-0.52	-0.56	-1.61	0.55	-0.73	-0.99	-0.07	0.13	0.16	-0.79	0.33	-1.78	-0.94	0.65	-0.34	0.38	-0.54	-1.01	-1.06	0	0.14	0.08	-0.66	0.24	-0.45	0.53	-0.58	-0.25	-0.45
NDE1	0.84	-2.51	-0.17	0.22	-1.61	-1.63	-0.78	-2.36	-1.24	0.33	1.41	1.57	0.68	-0.7	-1.15	-0.92	0.27	0.74	-0.37	-1.26	-1.04	0.15	-1.13	-2.79	0.34	-0.38	-0.51	-0.83	-0.47	0.59	-1.03
OR6S1	0.77	-0.71	-0.23	-0.73	-1.61	1.08	-0.71	-0.33	-0.48	-0.28	-0.81	-0.74	-0.48	0.66	-0.86	0.51	-0.8	0.34	0.24	-0.63	-1.5	0.95	1.69	-0.07	-0.18	1.63	0.15	-0.21	1.61	1.3	0.19
RAB18	-0.69	-0.18	0.23	-1.68	-1.61	0.11	-0.39	-1.59	-2.05	-1.17	0.51	2.11	-1.12	0.18	-1.27	0.85	0.28	-4.62	0.41	0.17	-0.02	0.63	0.04	-1.85	-0.91	0.71	-0.65	-0.35	0.61	0.1	-2.61
SERPINB4	-1.82	-1.22	-1.64	-3.07	-1.61	-0.65	-0.95	0.42	-0.01	0.68	0.19	-0.63	0.03	1.04	-0.27	-0.01	-1.17	-0.78	-0.75	-1.07	-0.75	-2.16	-0.09	0.09	0.08	-0.4	-0.09	-0.47	0.89	0.98	0.28
SMIM5	0.33	-1.01	1.12	-0.33	-1.61	-0.67	0.53	-0.47	1.18	-0.48	0	1.6	-0.51	-0.84	-0.12	-0.75	0.27	0.39	0	-0.18	0.26	-0.13	0.05	-0.25	0.5	0.83	0.38	0.91	-1.22	-0.13	-1.33
TCF7L1	-0.79	-1.04	-1.97	-1.73	-1.61	-0.78	-0.2	0.98	0.22	-0.48	0.75	0.12	1.1	0.25	0.43	-0.14	1.03	0	0.33	-0.22	0.81	-0.6	0.86	0.17	1.17	1	0.55	0.52	-0.62	-0.47	0.05
TRIM36	0.03	-0.89	-1.78	-1.53	-1.61	-0.88	-0.9	-0.69	-0.94	0.05	0.45	-0.18	0.18	-0.03	0.82	-0.96	0.49	-0.08	-0.72	-0.79	-0.43	-0.94	0.94	-0.15	0.33	1.01	0	-0.25	0.03	0.37	0.55
CLDND1	-0.13	-0.39	-0.45	-0.82	-1.6	-1.25	-0.82	-1.13	-1.66	-1.24	1.38	0.26	0.07	0.01	-1.15	0.67	0.24	-0.45	0.36	0.37	0.18	0.49	-0.79	0.7	-0.58	-0.08	0.4	0.06	-1.47	1.09	-0.15
COG5	-3.41	-0.49	-1.42	-1.49	-1.6	-0.2	-0.34	-1.35	-1.28	-0.11	1.61	1.32	1.59	-0.09	-1.12	0.44	-0.44	0.34	0.17	0.27	-0.17	1.46	-0.88	-1.82	-0.69	0.03	-1.41	-0.36	2.73	2.79	2.44
CTNNA3	-1.68	-1.91	-1.35	-2.12	-1.6	-0.36	0.75	0.73	-0.28	0.38	1.16	-0.49	0.9	0.44	0.66	-0.2	1.04	0.91	1.16	-0.35	-0.77	-1.02	-0.43	0.38	-1.15	-1.01	-0.31	0	-1.07	-1.15	-0.87
FSIP1	-0.96	-1.14	-1.65	-0.7	-1.6	-0.4	-0.67	-1.4	-0.27	-0.81	0.36	-0.02	-0.45	-0.11	-1.74	-0.94	0.25	0.33	-0.11	-0.21	0.2	0.55	-0.62	-1.19	-1.32	-0.6	-0.78	-0.2	0.84	-0.69	0.77
GJA8	-0.83	-1.03	-0.36	-0.71	-1.6	-0.05	0.21	-0.52	0.25	-1.06	-0.42	-1.15	0.49	0.1	0.09	1.18	-0.58	0.48	0.86	1.14	1.11	0.35	-1.21	-0.46	-0.48	-0.73	-0.93	0.18	0.62	0.55	-0.5
IGFLR1	-0.81	-1.88	0.55	-0.81	-1.6	-0.8	-0.39	-0.97	0.2	-0.55	-0.55	0.74	1.05	0.42	0.3	1.27	-1.45	-1.09	-0.16	-0.67	-0.52	-0.65	-1.52	0.3	-0.86	0.05	-0.84	0.41	0.13	-0.58	0.48
IL18	-1.05	-1.04	-1.22	-1.33	-1.6	-1.08	-1.95	-0.55	-2.65	0.26	-1.28	-0.13	0.25	-0.04	1.26	-0.26	0.58	1.7	0.7	0.98	1.04	-1.27	-0.46	0.7	-0.28	-0.33	-0.97	0.1	0.89	0.62	1.32
LTK	-0.89	-0.15	-1.02	-0.82	-1.6	-0.71	1.1	-0.13	1.43	-1.51	-0.39	0.04	0.13	-0.37	-0.04	-0.07	1.21	-0.51	-0.38	0.32	0.58	0.36	-0.27	-0.4	-0.56	-0.14	-0.34	-1.27	0.36	0.55	-0.39
MKL1	-0.45	-2.83	-1.41	-0.95	-1.6	-1.09	-0.45	-1.99	-0.59	-0.38	-0.05	-0.83	-0.19	-0.05	-1.75	-2.43	1.6	-0.12	0.63	0.01	-0.44	0.19	-0.78	4.74	-2.82	0.78	-0.48	-0.53	-1.28	0.56	-0.82
MSLN	0.19	-0.96	-1.08	-0.3	-1.6	2.15	0.52	1.01	1.13	1.14	0.03	0.21	-0.75	-0.73	0.94	-0.55	0.34	0.31	0.08	-0.26	-0.19	-1.18	-1	-0.51	-0.52	-0.55	-0.58	0.59	-0.31	0.39	0.21
NOP14	-1.08	0.81	-1.47	-2.3	-1.6	0.33	-0.03	-0.32	-0.25	0.64	-0.57	-1.54	-0.32	-1.9	0.27	0.05	0.41	-0.61	1.7	2.36	2.63	-0.38	-0.39	-0.68	0.16	-0.84	-0.3	0.81	-0.31	0.61	1.19
NPAS3	-0.96	-0.68	-0.85	-0.77	-1.6	-0.63	-0.76	0.33	0	-0.17	-0.51	1	-1.1	-0.42	-0.05	-1.62	0.6	0.62	-0.24	-0.33	0.15	-0.48	1.2	0.3	1.32	0.77	1.91	0.85	0.39	0.76	1.84
OR4D1	0.42	-0.11	0.18	-0.76	-1.6	-1.22	-1.14	-2.75	-1.44	-0.3	0.51	-0.3	0.9	1.15	0.02	0.74	1.02	0.61	-0.02	0.68	1.36	1.03	0.19	0.91	1.21	1.43	0.99	0.33	-0.67	-1.02	-0.05
TRPA1	-0.01	-1.61	-0.67	-0.39	-1.6	0.69	-0.98	0.58	0.1	0.9	-0.03	-1.09	0.58	0.78	-0.66	-1.07	-1.4	-0.88	-0.38	0.28	0.3	-0.27	-0.59	0.44	-0.04	-1.56	-2.16	0.91	-0.61	0.29	1.34
ABCG4	-0.24	-0.56	-1.35	-0.44	-1.59	-0.96	-0.37	-0.63	-0.67	-2.31	0.75	0.44	0.51	-0.33	-1.1	0.28	0.47	-0.02	-0.65	-0.54	0.03	0.55	-0.46	0.24	0.39	0.53	-0.06	-0.76	0.7	-0.24	-0.45
ACTL9	-1.53	0.59	-0.46	-0.33	-1.59	1.23	1.23	2.17	0.77	1.13	0.9	3.34	1	-0.18	-0.37	1.47	0.27	-0.01	0.27	0.32	0.74	-0.56	-1.74	-0.93	0.06	-0.63	-0.28	-0.18	1.19	-0.22	0.03
ALS2CR12	-0.45	-1.17	-0.41	-1.56	-1.59	-0.99	-1.15	-0.64	-1.22	-0.76	0.22	-0.54	-1.56	0.11	0.15	-0.65	0.03	-0.2	-0.7	-0.93	-0.44	0.08	0.65	0.92	-0.04	0.26	-0.74	0.67	-0.59	-0.77	-0.99
ARMCX5	-0.29	-0.33	-0.51	-0.55	-1.59	-0.08	-0.66	-0.61	-0.47	0.28	0.6	-0.81	0.21	-0.23	0.68	0.47	-0.59	-0.3	-0.22	-0.71	-0.94	-0.45	-0.42	0.3	-1.26	-0.81	0.02	1.52	-0.2	0.17	1.07
CAP2	-0.88	0.3	-0.72	-1.42	-1.59	-1.66	-0.64	-1.01	-0.79	0	-1.52	-0.64	2.59	-1.1	-0.22	-0.01	-1.04	-1.61	-0.81	0	-0.79	-1.36	0.97	-0.36	0.41	0.92	0.22	0.01	-0.28	0.14	-0.35
CASP16	-2.06	-1.63	-1.4	-2.86	-1.59	-0.59	0.33	-0.98	0.53	-0.78	0.71	-0.05	0.74	0.66	0.14	0.29	1.41	0.51	0.15	0.06	0.5	0.8	-1.16	0.71	0.43	0.58	0.62	-0.35	0.66	-0.49	-0.31
DERL3	-1.17	-0.72	-1.22	-1.32	-1.59	-1.82	-2.08	-0.94	-1.6	-0.95	-1.51	-1.19	1.16	-0.27	-0.37	-0.75	-1.43	-1.12	-0.93	-0.66	-0.15	0.97	-0.14	0.83	-0.17	0.54	0.13	0.3	-0.17	0.67	-0.52
FAM104B	-0.09	-0.86	-1.13	-1.2	-1.59	-1.13	-1.54	-0.63	0.05	-0.36	-0.8	0.39	-0.1	0.44	1.2	-1.57	0.21	0.36	-1.28	-0.86	-1.1	-1.97	1.64	0.07	0.14	0.55	0.98	0.89	-2.85	-0.3	-0.41
KCNJ1	-1.17	-1.7	-1.44	-1.58	-1.59	-0.98	-0.8	-0.85	-0.54	-0.69	-0.85	-1.43	0.4	-0.71	0.96	0.53	0.65	0.23	-1.15	-0.28	-0.88	-0.01	-0.04	0.44	-1	-0.94	-1.14	0.12	0.24	-0.05	-0.47
KLHL40	-1.48	1.39	0.31	-1.46	-1.59	0.88	1.04	1.7	1.71	0.4	1.03	1.01	-0.33	-0.43	-0.04	0.31	1.07	0.13	-1.04	-0.69	-0.78	-0.34	0.56	-0.43	-0.02	-0.56	0.79	-1.7	2.53	0.87	-0.03
MLLT3	-1.27	-0.54	-1.32	-1.17	-1.59	-1.28	-0.88	0.46	-1.19	0.5	-0.55	-1.11	0.17	0.46	0.22	0.28	1.33	1.18	1.74	0.79	1.21	1.02	-0.12	0.61	0.16	0.87	0.51	1.49	0.19	0.41	-0.16
OPALIN	-1.77	-0.51	-0.84	-1.46	-1.59	-0.58	-0.1	0.46	-0.53	0.43	0.98	-1.19	0.9	-0.37	-0.79	-0.32	0.76	-0.82	-0.05	-1.25	-1.47	-0.37	1.04	0.26	-0.09	0.69	1.77	1.28	-1.18	-2.29	-0.33
PLXNA1	-1.32	-1.22	0.15	-0.7	-1.59	-1.07	0.43	-1.4	-0.41	-0.92	-0.4	0.54	0.85	0.51	0.53	-2.22	-0.75	-0.58	-1.39	-1.3	-0.66	0.46	0.38	-1.46	0.19	-0.67	-0.37	-0.29	1.03	-0.91	0.45
TUSC3	0.05	-0.29	0.41	-0.7	-1.59	-0.61	-0.8	-0.94	0.34	0.45	0.67	0.18	0.5	0.53	1.18	-0.1	-0.28	0.84	-0.25	-0.26	-0.26	0.06	0.63	-0.37	0.51	-0.13	0.4	0.22	-1.04	-0.48	-1.75
WDR45	0.24	-1.58	-0.61	-0.51	-1.59	-1.59	-1.52	-0.23	-1.44	-1.13	1.27	1.18	0.95	0.04	1.41	-0.53	1.92	0.13	0.99	-0.16	0.45	0.8	-0.24	-1.16	0.29	-0.2	0.62	0.35	0.45	1.01	1.69
WDR72	-1.04	-0.92	-1.29	-1.64	-1.59	-0.81	-0.12	-0.32	0.33	-0.74	-0.05	-1.76	0.54	0.18	-0.11	0.41	-0.05	-0.4	-0.05	-1.33	-1.67	-0.14	0.19	-0.41	0.25	-0.61	0.28	0.67	-0.86	1.22	1.82
ZBTB2	-1.67	0.44	-2.84	-0.09	-1.59	0.82	0.27	0.36	0.36	-0.31	-0.08	0.78	-0.7	-0.83	-0.7	0.57	1.79	1.17	0.65	-0.02	-0.72	-0.34	-0.15	-1.49	-1.84	-0.16	-1.05	0.62	-1.92	-2.81	-2.73
ZFP2	-0.93	-0.01	-0.51	-0.57	-1.59	0.25	-0.41	-0.35	0.41	-0.67	1.7	1.06	0.56	0.75	0.14	1.69	-0.36	-0.27	-0.81	-1.6	-1.61	0.39	1.37	0.74	0.34	0.23	0.69	-0.07	0.32	0.06	-0.05
ZNF101	-0.71	-1.07	-0.49	-0.27	-1.59	-0.88	-1.43	-1.54	-0.51	0.12	1.33	1.72	-0.91	-0.59	-0.89	-0.75	1.19	2.32	0.23	1.12	0.87	0.56	-1.16	-1.5	-0.42	-1.18	-1.37	0.46	1.06	-0.18	0
ZNF76	-1.41	-0.76	-1.45	-2.18	-1.59	-0.47	1.6	1.19	0.92	1.11	1.47	-0.67	-1.44	0.46	0.28	0.09	-0.43	-0.71	0.67	0.72	-0.85	-1.1	0.5	-0.36	0.52	-0.18	0.13	0.45	-0.17	-0.76	1.13
ACTA2	-0.71	-1.58	-1.14	-0.92	-1.58	-0.7	-1.8	-1.06	-1.34	-1.03	0.12	1.63	-1.52	0.61	0.17	-0.88	1.46	0.75	0.37	0.29	0.07	0.35	1.2	0.13	0.41	-0.67	0.48	0.4	-0.55	-1.01	-3.83
CCT6B	-1.03	-0.46	-1.47	-1.38	-1.58	1.73	0.19	0.45	2.26	0.94	-0.31	-1.49	0.03	-0.07	-0.64	-1.04	0.61	1.17	0.26	-1	-0.92	0.03	0.36	0.19	-0.76	0.18	-0.93	0.28	1.01	-0.1	0.98
CTU1	-1.57	-1.57	-1.45	-1.55	-1.58	0.99	2.43	1.13	-0.23	0.39	0.75	0.32	0.64	1.67	1.01	-0.45	0.27	0.5	2.29	3.13	2.78	1.21	-0.42	2.74	0.57	1.44	-0.43	-0.46	1.08	-0.13	-0.27
FXYD7	-0.4	-0.37	0.12	-0.14	-1.58	0.27	0.07	0.29	0.63	-0.16	-0.02	-0.15	0.99	0.8	1.27	0.32	-0.53	-0.36	0.01	-1.27	-1.34	-0.27	1.3	-0.75	-1.09	0.48	1.17	-0.6	-0.85	-0.13	0.45
GGA1	-0.1	0.85	1	0.69	-1.58	-0.26	-0.13	0.31	-0.8	0.64	0.61	-0.55	0.47	-0.01	-0.37	-0.08	1.2	0.63	0.68	-0.39	-0.1	-0.64	0.54	-0.32	-0.27	0	1.05	0.5	0.44	-0.56	-1.19
GJC3	-2.34	-2.92	-1.37	-2.21	-1.58	0.83	-0.32	0.5	-0.78	0.53	-1.22	-1.21	-0.88	-0.4	-0.44	1.94	-1	0.21	0.16	0.49	0.05	1.41	-0.13	0.73	0.85	0.42	-0.85	0.26	0.16	0.74	-1.59
GPR146	0.2	0.68	-0.39	1.19	-1.58	1.16	0.67	0.28	1.07	1.08	-0.17	0.24	1.29	-1.46	0.14	1.05	1.07	-0.33	-0.41	0.52	0.36	-0.81	0.28	0.44	1.47	0.86	0.56	-0.54	2.13	1.18	-0.6
HDAC9	-0.66	-0.11	-0.51	-0.67	-1.58	0.83	0.63	1.05	0.64	0.91	-1.14	-0.58	0.36	0.1	0.81	0.29	0.03	-0.19	-0.32	0.01	-0.33	0.3	0.51	-0.28	0.4	0.06	-0.08	-0.04	0.04	0.66	0.62
HIST4H4	-0.83	-1.44	-1	-1.31	-1.58	0.5	-1.47	0.55	-0.18	-0.55	-1.07	-0.75	-0.32	-1.96	0.49	-1.89	1.4	0.66	0.06	-1.28	-1.25	0.41	-1.13	0.05	-0.25	-0.32	-0.51	1.19	0.97	-0.64	-0.26
IRF8	-0.73	-1.29	-1.17	-1.39	-1.58	-0.46	-0.35	0.75	0.45	0.26	-0.49	0.61	-0.17	-0.02	1.06	-0.3	1.35	0.45	0.53	0.65	1.43	0.8	-1.01	0.2	0.66	0.24	-0.27	1.06	0.82	-0.81	-1.09
KLHDC7B	-0.85	-2.07	-0.1	-0.87	-1.58	-1.41	-2.18	-1.85	-0.81	-0.98	-0.38	-0.19	0.53	-0.7	0.43	-1.18	-0.13	-0.83	-0.43	0.17	-1.19	-0.25	0.07	0.18	-0.57	-0.35	-1.74	0.98	-0.91	0.29	-1.01
KPNA6	0.57	-1.33	0.64	0.13	-1.58	-0.57	-1.67	-0.64	-1.44	0.01	1.06	0.1	-0.07	1.71	-0.12	-0.93	-0.7	0.27	-0.45	-0.55	-0.27	-0.99	-0.1	0.74	-1.08	-0.63	-1.54	-0.09	-0.28	0.86	0.99
MRPS23	-0.44	-0.44	-0.89	-0.31	-1.58	-0.42	-0.39	0.53	-0.72	0.29	1.39	-0.65	0.76	0.84	-0.21	0.93	0.66	-1.69	1.06	0.37	0.25	-0.95	-0.08	0.02	1.73	0.99	0.59	0.49	-0.73	1.53	0.83
MS4A6A	-0.45	-1.05	-0.41	-0.92	-1.58	-1.2	0.37	-0.93	0.04	-0.77	-0.03	-0.24	-0.41	0.62	1.12	-0.72	-0.83	-0.11	-1.05	-0.41	-0.42	0.38	-0.74	-0.51	-0.6	-0.99	-2.39	0.21	-1.44	-0.12	0.3
NPTN	1.04	-1.03	0.77	0.36	-1.58	-0.42	-0.82	-0.21	-1.33	0.11	0.51	1.08	0.57	0.12	0.97	-0.32	-0.21	-0.24	0.78	-0.28	-0.14	0.55	0.47	-1.24	-1.66	-0.89	-0.33	-0.07	-0.49	-0.75	0.36
NRIP1	-0.14	-0.93	0.72	-1.69	-1.58	-0.03	-1.99	-1.22	-0.8	0.17	1.24	-0.28	-0.05	0.24	-1.05	0.4	0.15	0.72	0.99	-0.03	-0.58	0.17	1.56	1.54	0.69	0.16	0.65	0.53	-3.12	0.64	-1
NT5DC2	0.66	-0.78	0.07	-0.66	-1.58	-0.96	-0.54	-0.16	-0.95	-0.61	0.52	0.15	-0.92	-0.9	1.37	0.05	-1.25	-1.03	-0.54	0.49	0.71	-0.98	-1.1	-0.41	-0.06	-0.71	-0.39	-0.97	0.42	0.06	-0.62
REV3L	-5.01	0.29	-1.37	-1.52	-1.58	-1.41	-0.61	-2.67	-1.5	-6.86	0.65	1.1	-3.43	-5.72	-4.39	-1.03	-1.96	-1.52	-1.61	-0.2	-0.59	-1.61	-7.55	0.51	-0.51	-3.4	0.1	-0.7	-7.78	-0.12	0.12
SUMF2	-2	0.44	-2.11	-2.8	-1.58	-0.63	-0.47	-0.34	-0.99	0.09	-0.35	0.77	-0.2	-0.04	-0.11	-0.1	0.32	-0.33	0.5	-0.49	0.08	1.62	0.06	-0.23	0.11	0.15	0.32	-0.15	-0.96	-2.68	-1.3
ZCCHC18	0.06	-0.6	-0.01	-0.41	-1.58	-1.24	-1.22	-0.84	-2.33	-0.05	-1.54	0.37	0.09	0.02	0.74	-1.87	0.01	-1.01	-0.2	0.5	0.62	0.01	0.82	-0.19	1	0.51	0.26	-0.68	0.63	0.99	1.51
ZNF215	-0.68	-0.27	-1.08	0.16	-1.58	-0.65	-0.48	-0.19	-0.81	0.01	0.01	-1.8	-0.7	0.78	-0.04	-0.28	0.89	0.73	0.88	-0.29	-0.1	-0.24	0.81	0.99	0.89	1.17	0.51	-0.65	0.76	-0.36	0.79
AP003774.4	-1.12	-1.2	-0.6	-1.72	-1.57	0.1	-0.7	0.11	-0.44	0.4	0.35	0.9	0.39	0.7	-0.16	-0.14	-0.82	-0.45	-0.23	-0.38	-0.35	-1.48	0.87	-0.06	0.67	0.31	0.8	0.6	-0.42	1.15	1.46
ARHGAP33	-0.01	-0.54	0.7	1.3	-1.57	0.95	0.63	0.56	0.97	0.84	0.4	0.75	1.03	0.74	-0.87	0.59	-0.7	0.06	-0.33	0.07	0.26	0.26	0.29	0.41	0.15	-0.01	-1.32	0.49	0.84	1.67	1.83
BCL2L12	-1.68	-0.91	-1.13	-1.21	-1.57	-0.33	-0.85	-1.53	-0.93	-0.34	-1.64	-0.75	1.46	0.09	-0.42	-1.28	0.19	0.55	0	-0.87	-0.71	-1	-1.36	-0.44	-2.33	-1.07	-1.34	0.46	-0.98	-1.1	-1.71
BZW2	-1.33	0.51	-0.72	-0.04	-1.57	1.01	-0.04	1.72	1.2	0.86	-0.1	0.58	-0.29	-0.45	-0.74	0.15	-0.23	-1.56	-1.05	-1.47	-0.79	0.22	0.09	-0.26	-1.2	-1.06	0.89	0.36	-1.88	-0.55	-0.89
C3orf30	0.41	-0.28	-0.1	-1.24	-1.57	0.05	0.05	0.54	-0.24	0.06	-0.54	-0.24	0.51	0.09	0.48	-1.02	-0.48	1.23	0.58	0.19	0.26	0.3	0.49	0.3	0.76	-0.07	0.59	-0.19	-0.91	0.91	0.2
CDC42EP3	0.4	-0.47	0.07	1.57	-1.57	-0.75	-0.32	1.11	0.01	0.5	-2.11	-1.08	-1.32	-0.86	-1.06	-1.63	-0.15	-0.29	-0.23	-0.63	-1.01	-0.52	0.57	0.22	0.02	-1.03	0.95	-0.33	-0.63	-0.12	-0.35
CXXC1	-1.94	-1.1	-1.63	-1.85	-1.57	-1.53	-0.99	-0.42	-1.97	-0.82	0.46	-1.83	-0.6	-0.77	-2.33	1.45	0.19	0.78	3.5	1.57	-0.12	-1.17	-1.62	-2.8	-1.59	-3.53	-3.3	-0.29	0.97	1.07	0.62
DNMT3A	-0.61	-0.69	-0.48	-0.6	-1.57	-1.43	-0.71	-0.73	-0.13	-1.12	-0.97	-0.53	0.35	0.4	-0.01	0.89	0.32	-0.44	-0.14	0.43	0.59	-1.03	1.59	0.77	1.58	0.22	0.33	-0.57	-0.02	0.26	0.35
ECT2	-0.16	0.32	-1.26	-0.57	-1.57	1.13	0.2	0.67	1.39	0.22	-0.37	-0.5	-0.44	-0.01	-0.66	-0.01	0.72	0.11	1.43	1.38	2.27	-0.31	0.86	0.88	0.38	0.12	0.83	0.87	0.01	0.25	0.26
EP400NL	-1.08	1.05	-0.12	-0.3	-1.57	0.94	0.58	1.48	1.53	1.44	-0.09	0.9	0.77	0.17	-0.41	-0.24	-1.53	-0.7	0.07	0.67	1.07	-1.36	-0.14	-0.4	0.2	0.78	0.18	-0.77	1.16	-0.11	-0.47
GATAD1	1.01	-1.58	-0.55	1.37	-1.57	1.2	2	1.97	1.32	0.6	-0.87	0.06	-4.35	-0.26	-1.31	-1.16	-0.37	1.41	-1.14	-0.29	-0.11	0.99	-1.5	-3.09	-0.87	-3.85	-1.48	-2.35	-0.84	-1.04	-1.13
HHIPL1	-0.11	1.02	0.82	0.17	-1.57	-1.08	-0.35	-0.57	-0.32	0.04	0.31	0.41	0.65	-0.94	-0.2	-0.12	-0.54	-0.27	-0.76	0.11	0.35	0.44	-0.24	0.24	1.55	-0.12	-0.49	0.62	0.71	1.18	0.25
KRTAP22-2	-1.45	-0.44	-1.52	-1.41	-1.57	-0.77	0.24	0.22	-0.51	0.57	-1.66	-0.75	-1.06	-0.13	0.36	-0.4	1.03	-0.96	-0.43	-0.63	-1.49	-0.2	0.67	-0.11	0.38	-0.12	1.52	-0.42	-0.24	-0.08	0.76
LDHB	-1.48	-1.04	-1.44	-1.77	-1.57	0.48	-1.04	0.07	-1.07	-0.11	-1.28	-0.87	0.17	0.08	0.01	1.51	0.06	0.01	-0.28	-0.92	-0.62	-0.66	1.05	-0.02	0.38	0.22	0.89	0.04	-0.65	-0.9	-1.04
LRRD1	-1.5	-1.42	-1.99	-2.29	-1.57	-1.04	-1.15	-0.49	-1.05	-0.07	0.12	-0.99	-0.01	-1.07	0.38	0.55	-0.13	-1	0.61	-1.1	-1.36	1.18	-0.43	-0.28	-0.95	-1.15	-0.78	1.48	-0.33	0.61	0.92
luciferase	1.63	-0.13	0.79	0.43	-1.57	-1.75	-2.39	-1.77	-0.67	-1.79	2.01	0.75	0.16	1.35	0.34	-0.12	-0.85	-1.05	-1.42	-2.09	-1.5	-0.3	-0.18	0.36	0	0.04	0.4	0.21	-0.25	1.31	2.42
MRPS28	0.35	-1.38	0.5	-0.15	-1.57	-0.83	-2.2	-1.15	-0.86	-2.43	-0.56	-0.41	0.46	1.04	-0.24	1.22	1.14	-1.21	1.63	0.37	0.24	-0.3	-0.64	-1.29	1.18	0.85	-0.91	1.24	0.01	1.16	1.02
MTMR3	-0.61	0.79	-0.41	-1.29	-1.57	0.29	0.7	0.1	1.27	-0.76	1.86	2.55	-1.9	-0.59	-0.49	1.68	-0.51	-1.18	-0.78	-1.47	-1.06	0.51	-1.05	0.28	-0.67	0.54	-0.2	0.31	-0.95	1.31	0.25
SENP8	-1.26	-1.83	-2.25	-1.53	-1.57	-2.29	-0.8	-1.38	-0.62	-1.08	-1.28	-0.67	0.96	-0.11	-0.88	-2.79	-0.41	0.01	-1.37	-0.51	0.44	-1.28	-1.14	-2.36	-1.36	-0.94	-1.26	-2.8	1.12	-2.27	1
SUV39H1	-0.96	0.52	0.25	-1.34	-1.57	1.08	0.39	2.49	0.74	0.92	-0.14	-0.16	-1.3	0.54	0.33	-1.21	-0.48	0.39	-0.78	-0.14	0.34	-1.1	1.04	0.99	1.88	0.64	0.89	0.99	-0.13	-1.06	-0.5
TSHB	-0.64	-0.48	-1.34	-1.9	-1.57	-0.69	-1.15	0.39	-0.42	0.88	0.69	-1.6	-1.05	1.44	0.39	0.44	-0.52	-0.47	0.16	-0.32	-0.3	-0.28	-0.72	-0.64	0.47	0.46	0.92	1.14	1.09	0.13	0.69
C10orf71	-1.93	-1.48	-1.27	-1.76	-1.56	0.26	-0.14	0.88	0.21	1.21	-0.96	-0.09	0.53	0.77	-0.15	-0.71	-1.25	-0.05	0.14	0.34	-0.09	-0.77	0.27	0.89	0.9	0.1	0.54	1.48	1.54	0.65	0.84
C1orf170	-1.18	-0.68	0.14	-0.64	-1.56	-0.03	1.71	1.33	1.59	1.38	-1.21	0.09	1.24	0.68	-0.33	-0.47	0.97	0.96	1.45	-0.04	-0.88	0.34	0.92	0.69	0.15	0.59	0.73	0.95	0.05	-0.42	-0.5
CXorf21	-0.73	-1.85	-1.61	-0.4	-1.56	0.58	-0.54	-0.06	-0.02	0.57	-0.49	-1.02	1.67	0.15	-0.38	0.59	-1.29	0.14	-1.14	-0.64	-0.52	0.83	0.69	0.49	0.38	-0.42	-0.22	-1	-1.53	-0.99	0.94
ENO1	-3.71	2.22	1.48	1.91	-1.56	0.29	-1.76	-0.33	-0.75	-3.39	1.11	-0.34	-0.93	-5.23	-6.46	-1.04	2.01	-2.94	3.02	3.56	1.7	0.41	0.93	-1.75	2.98	-4.39	-3.2	4.21	-0.56	-0.18	-0.14
FAF1	-1.3	-1.33	-0.17	-1.04	-1.56	1.2	0.11	-1.08	-0.52	-0.61	1.82	0.23	1.16	-0.72	-0.4	-0.77	0.07	0.41	0.93	0.52	-0.24	-0.02	-0.67	0.57	-0.92	-0.68	-1.03	-0.28	1.02	0.37	1.43
GBF1	-0.05	0.58	-0.31	0.41	-1.56	0.14	-0.18	0.13	0.47	-1.08	-0.25	0.78	1.14	0.87	0.11	-1.74	0.67	1.1	-0.27	0.49	0.9	0.25	0.34	0.4	-0.81	-0.46	-0.09	-1.01	1.02	0.98	0.21
JPH4	-0.47	-0.15	0.54	-1.45	-1.56	0.63	-0.37	-0.11	0.31	0.44	1.26	0.68	-0.32	0.14	1.56	-0.15	-0.97	-0.42	-1.07	-1.18	-1.42	2.6	-0.22	0.3	-1.01	-0.34	-0.03	-0.98	0.06	-0.1	-0.29
LAMC2	-1.88	0.18	-0.48	-1.49	-1.56	0.89	-0.38	0.76	0	0.08	2.07	0.84	-0.46	0.57	0.21	0.19	0.84	0.29	-0.61	0.52	0.54	0.53	0.82	-0.43	0.62	0.36	0.17	-0.86	0.24	-0.37	-0.94
LYN	-1.13	-0.94	-0.65	-0.57	-1.56	-0.84	-1.3	-1.42	-1.28	-0.85	0.94	0.45	-0.48	-0.58	-0.13	-0.12	-0.47	-0.12	-0.81	-0.22	-0.22	-0.51	0.67	0.41	0.85	-0.2	0.36	0.08	-1.25	-1.82	-1.45
MUM1L1	0.1	-0.54	-1.75	-0.24	-1.56	-0.05	-0.03	-0.77	-1.17	-1.03	-0.5	-2.05	-0.11	-0.12	-1.14	-0.96	0.27	0.6	0.72	-0.92	-0.3	0.23	-0.51	-0.51	-1.05	-1.03	-1.31	1	-2.06	-0.36	-0.39
NOP2	-1.6	-0.65	-0.53	-0.26	-1.56	-1.23	-1.15	-1.37	-2.12	-0.87	0	0.62	-0.4	0.47	-0.68	-0.58	1.45	1.03	3.53	2.72	2.5	-0.75	-0.29	1.68	-0.84	-0.59	-0.66	-0.4	-0.85	0.38	-0.22
PAK6	0.27	0.35	-1.69	1.13	-1.56	-1.04	-0.67	-0.71	-1.17	-0.19	-0.75	-1.28	-1.52	-0.28	-0.39	-1.2	-1.15	-0.64	-0.79	0.38	-0.04	-1.13	-1.28	0.28	-0.86	-1.1	-1.4	-0.63	-1.13	-0.49	-0.44
PCMT1	-0.7	-0.67	-0.09	-0.51	-1.56	-0.06	-0.34	0.67	0.59	0.9	-0.07	0.78	-0.71	-0.22	0.14	0.62	-1.29	-1.55	-0.94	-0.02	-0.48	-0.29	0.19	0.33	0.11	0.26	0.28	-0.42	-1.36	0.06	-0.32
PCSK9	0.25	-1	1.33	-0.14	-1.56	0	0.99	0.56	0.45	0.67	1.31	0.88	-0.58	-1.25	1.3	0.09	-1.43	-1.21	-0.03	-0.31	-0.66	0.77	0.75	-0.22	0.63	0.18	0.08	-1.12	-0.92	-1.99	-1.17
PTTG1IP	-0.92	-1.53	-1.9	-1.84	-1.56	0.35	-1.09	1.51	0.46	0.61	-0.24	1.9	-0.01	-1.62	-0.37	1.31	-0.09	-0.33	-0.36	-0.14	1	-0.23	0.79	1.75	0.25	0.04	0.61	0.36	0.71	-1.26	-0.65
RLN2	-0.93	-0.95	-0.72	-0.4	-1.56	0.17	0.08	0.22	0.74	0.54	-0.98	-2.09	-1.05	0.56	1.01	-0.15	-1.49	-0.27	-0.53	0.5	0.26	0.05	-0.88	-0.23	0.21	-0.81	-0.83	0.74	1.33	1.35	0.85
RNF223	-1.19	-0.93	-2.37	-1.17	-1.56	0.99	-0.44	0.34	0.23	0.15	0.27	0.86	0.1	-0.04	1.14	0.16	-0.6	0.41	-0.35	0.22	-0.4	-1.55	0.3	-0.04	0.61	0.49	-0.38	0.24	-0.42	0.85	0
RTP3	-1.67	0.55	-0.83	-1.02	-1.56	0.55	0.83	1.75	0.55	0.51	-0.05	-0.47	-0.09	-1.64	-0.09	-1.12	-0.73	-0.67	-0.54	0.02	1.13	-0.1	-0.92	0.03	0.25	-1.21	-0.24	0.09	-0.04	0.12	1.17
SCPEP1	-0.53	1.13	-0.06	-0.6	-1.56	1.08	-0.31	-0.13	0.22	-1.29	0.31	0.02	-0.92	1.64	1.09	1.05	0.41	0.27	0.91	0.38	1.4	-0.3	1.46	0.75	0.69	-0.24	0.76	-0.03	-0.47	0.92	0.25
SGSM3	-1.43	-0.21	-1.42	-1.85	-1.56	-1.01	-1.32	-1.18	0.16	-0.54	1.64	-0.5	0.82	-0.62	0.14	0.17	-0.04	-0.15	-0.05	-0.86	-1.39	-1	0.51	0.59	-0.53	-0.01	1.67	0.82	-0.43	0.79	-0.8
SNTB2	-0.71	-0.21	-1.47	-1.54	-1.56	-0.09	0.02	1.1	1.31	0.91	1.57	0.16	-1.4	-0.16	0.46	1.3	0.43	-0.5	-0.14	-0.63	-0.65	-0.4	0.75	1.23	1.4	0.35	0.7	0.04	0.1	-1.08	-1.66
SP110	-0.15	0.1	-0.13	-0.07	-1.56	-0.05	0.6	0.02	0.54	-1.12	-1.03	-0.48	-0.86	0.11	-0.94	-1.28	-0.97	0.72	-0.56	-1.02	-1.19	-0.41	-0.06	-1.1	0.46	0.67	0.55	-2.01	0.28	0.01	-0.9
ZHX1	-0.54	-1.07	0.26	0.07	-1.56	-0.93	-0.89	-1.78	-1.57	0.11	1.01	0.43	0.41	-0.12	-0.2	-0.61	0.51	-0.41	0.53	0.51	-0.04	0.57	0.62	-0.05	0.79	0.22	0.5	0.22	-0.01	0.51	0.41
ZNF614	-2.25	-0.94	-1.08	-2.24	-1.56	-0.27	0.18	-0.86	0.33	0.61	0.06	-0.75	-0.64	0.37	-0.52	-0.55	0.75	0.05	-0.65	-0.63	-0.56	1.24	-0.48	-0.07	-0.67	0.34	0.13	-0.8	-0.28	-0.54	1.48
ACE2	-1.47	-1.33	0.11	-1.51	-1.55	0.68	0.9	1.46	1.56	0.21	-0.4	0.26	-0.9	0.16	-0.16	-0.01	-1.12	-0.76	-0.36	-0.03	-0.12	1.05	-0.31	0.67	-0.55	-0.08	-0.73	-0.44	-0.16	-0.05	0.25
C16orf52	-1.68	-0.95	-1.6	-1.56	-1.55	1.24	-0.04	0.97	2.16	-0.68	0.96	1.23	0.47	-0.12	1.06	-0.04	0.65	-0.09	0.23	0.6	0.29	0.61	-0.4	0.05	2.17	1.07	1.74	0.24	-0.12	-0.32	-0.53
CLSPN	-0.3	0.1	-0.4	-0.98	-1.55	0.02	1.13	0.69	1.41	-0.07	-0.68	-0.72	-2.83	-0.12	-1.49	0.76	-1.23	-1.05	-1.41	-0.35	-1.93	1.79	-1.03	0.02	-1.23	-0.42	-0.79	-1.33	-0.6	1.02	0.62
CNEP1R1	-2.28	-0.67	-0.8	-0.82	-1.55	1.49	1.06	0.52	1.05	-0.48	0.29	0.08	-1.59	-1.1	0.2	0.05	-0.55	-0.38	0.52	0.28	-0.05	1.11	-0.11	-2.43	0.22	-0.04	-1.12	-1.31	0.33	-0.25	-0.21
FAM213A	-0.01	-0.64	0.07	-0.2	-1.55	-1.32	-0.13	0.07	-0.3	-0.74	-0.65	-0.88	0.45	0.13	0.41	-0.31	0.52	0.58	-0.03	0.25	-0.39	-0.97	1.05	0.3	0.16	0.22	0.93	0.33	-1.58	0.17	-0.56
GRIK1	-0.02	-0.55	0.12	-0.75	-1.55	0.14	-0.19	-0.08	0.81	0.58	-0.73	-1.41	-0.67	0.35	-0.67	1.61	-0.39	-0.43	-0.38	0.71	1	-0.02	0.99	0.87	1.17	0.3	0.73	-0.78	0.97	-0.7	-0.51
HSD17B4	-0.8	-1.56	-2.56	-1.31	-1.55	-0.09	0.05	0.06	-0.5	0.44	-2.46	-0.41	-0.73	0.29	-0.86	0.61	-1.22	-1.25	-0.68	-0.82	-0.8	0.11	-0.27	-0.74	-0.76	-0.88	-1.31	0.56	-0.25	-1.18	0.19
IFI30	-0.77	-1.44	-0.96	0.16	-1.55	-1.45	-2.65	-3.1	-2.28	-3.45	-0.06	-0.67	1.66	0.54	-0.45	-0.33	0.9	1.58	0.47	1.39	0.22	-0.16	-1.58	-0.63	-0.94	-1.05	-1.23	-0.74	1.03	0.77	1.61
IFT81	-0.12	-2.23	-1.23	-0.33	-1.55	-0.85	-1.56	-1.43	-1.87	0.99	-0.42	-0.05	0.26	-0.09	0.43	-1.4	-0.89	0.13	-0.3	-0.21	-0.08	0.36	-0.11	0.16	-0.1	0.45	0.73	-0.05	0.03	0.7	0.13
PTGIR	-1.48	-0.02	-1.57	-0.27	-1.55	0.81	0.39	0.54	0.62	1.01	0.86	1.62	1.02	0.34	0.67	-0.16	0.1	0.55	0.19	0.74	0.33	0.37	-0.26	0.61	0.02	1.37	-0.85	0.15	0.3	0.11	-0.02
RPTOR	-1.5	-2.1	-1.7	-0.42	-1.55	0.98	0.16	-0.29	-0.1	-0.26	0.55	1.47	0.29	-0.72	-0.6	-0.21	0.34	0.26	5.33	4.25	3.89	0.07	-0.08	0.73	0.61	-0.21	0.25	-0.6	0.43	-0.29	-0.79
STK36	-1.09	-2.2	-2.28	-1.38	-1.55	-0.96	-1.55	-0.51	-0.5	-1.45	0.74	1.43	0.24	0.56	0.19	-0.84	-0.02	0.19	-0.17	0.08	0.96	-1.43	0.29	-1.04	0.5	-1.08	-0.64	0.49	-0.38	-1.04	-0.45
STMN2	0.02	-0.5	0.75	-0.63	-1.55	-0.93	0.96	0.49	-0.37	1.07	1.3	0.78	0.56	0.32	-0.19	0.69	0.09	-0.06	0.16	-0.79	-0.28	1.96	-0.33	0.3	0.25	-0.52	0.51	-0.35	-0.24	0.75	1.22
SUOX	-0.84	-1.19	-0.95	-2.23	-1.55	0.79	0.46	1.07	1.07	1.05	1.17	0.23	0.26	0.1	-0.14	-0.15	-0.3	-0.22	0.23	0.04	-0.47	0.01	0.31	-0.69	-0.78	-0.05	-0.78	-0.9	-1.5	-0.41	-1.9
TEF	-0.03	-0.17	0.79	0.16	-1.55	-0.79	-0.26	0.01	-0.09	-0.08	-1.34	-0.35	0.93	0.8	-0.39	1.51	-1.65	-0.83	-1.07	0.57	0.4	1.66	0.62	0.42	-0.47	-0.01	0.2	-1.02	0.16	-0.26	-1.45
TPGS1	-1.25	0.01	-1.3	-1.24	-1.55	0.13	-0.15	0.24	-0.34	0.37	0.28	1.64	1.58	0.57	-0.11	-0.08	0.55	-0.07	-0.66	0.37	0.43	2.17	-1.29	-0.82	-0.06	-0.22	-0.25	-0.55	-0.63	-0.95	-1.33
WDR83	-1.92	-1.34	-2.26	0.69	-1.55	-2.13	0.13	-3.81	-1.75	-1.65	0.26	0.79	-1.54	-0.88	-2.25	0.85	0.8	0.88	0.86	0.44	0.03	0.3	-1.34	-4.73	-3.58	-3.17	-1.21	-2.06	0.28	1	-3.87
WNT3	-1.37	-0.55	-0.73	-1.14	-1.55	1.28	-0.24	0.57	0.58	1.06	0.02	0.64	0.19	0.02	-0.01	0.24	0.32	0.3	0.58	0.73	0.36	1.49	-0.07	-0.07	-0.08	0.08	-0.77	0.23	0.4	0.99	1.27
ZNHIT2	0.81	0.96	0.93	0.46	-1.55	0.53	-0.12	-0.96	-0.57	-0.81	1.07	0.8	-0.37	-0.48	-1.38	-0.98	-1.58	-0.26	-1.42	0.24	0.15	-0.28	-1.17	-0.74	-1.26	-1.8	-0.2	0.36	0.31	-0.45	0.04
C1orf111	0.16	1.49	-0.62	0.09	-1.54	1.03	-0.03	0.65	0.71	0.83	-1.3	-0.27	-0.89	-0.2	0.18	0.77	0.21	0.97	1.01	0.84	1.98	-0.09	1.46	0.12	0.34	0.16	0.84	-1.14	0.87	0.23	0.89
C4orf50	0.94	-1.39	0.57	0.02	-1.54	0.47	-0.02	-0.33	-1.01	-1.63	1.6	1.16	0.26	0.01	-0.99	2.04	-0.09	-1.85	-1.06	-0.23	-0.49	0.87	-0.88	-0.28	0.61	0.62	0.27	-0.54	0.94	0.84	1.15
DCPS	-0.27	-0.67	0.01	0.65	-1.54	-0.04	-1.32	-3.67	-2.79	-2.39	-1.06	-0.17	-0.78	-1.27	-0.84	1.16	-0.41	0.97	0.47	0.82	0.15	0.4	-2.69	-1.07	-1.19	-1.13	-0.6	-1.51	-0.19	-1.21	-0.45
GRAP2	-0.57	-0.75	-0.89	-1	-1.54	0.07	0.08	-0.06	-0.08	0.09	0.3	0.03	1.32	0.52	0.58	-1.49	-0.3	1.12	0.24	-1.01	-1.11	0.81	-0.19	-0.75	-1.31	-0.53	-0.36	0.6	0.91	0.2	0.08
KCTD20	-0.98	0.47	-0.79	-1.23	-1.54	-1.21	0.77	-0.01	-0.87	-0.61	-1.71	-0.01	-0.04	0.64	0.35	-1.24	-0.61	-1.12	-0.53	-0.09	-0.83	1.41	-0.79	0.41	-0.57	0.12	0.04	0.33	0.25	0.69	1.59
NRP2	-0.82	-0.31	-0.7	-1.89	-1.54	-1.67	-0.57	-0.59	-1.1	-0.95	-0.35	0	-0.87	-0.51	0.48	-1.04	-0.14	-0.24	0.64	0.99	0.78	0.5	-0.26	-0.94	0.17	1.14	-0.02	-1.02	-0.46	-1.4	-0.6
PAIP1	-2.34	-1.28	-0.51	-1.42	-1.54	0.91	0.61	0.15	2.02	0.39	0.63	-0.23	-0.28	0.55	-0.44	0.08	1.7	1.8	0.66	0.23	0.91	-1.09	-1.34	0.21	-1.02	-0.69	-1.56	-0.38	-1.15	-1.95	1.29
PHF14	-1.26	-0.24	-0.39	-2.97	-1.54	0.57	0.06	0.84	1.76	1.2	-0.12	0.76	1.15	-0.54	-0.15	-0.47	1.39	-0.42	-0.19	-0.94	-0.86	0.3	-0.08	0.56	0.04	-0.34	-0.42	-0.12	1.03	1.2	0.51
PRKAA2	-1.06	0.53	-1.24	-0.89	-1.54	-0.11	-0.97	-0.61	-1.1	-0.16	1.27	1.28	-0.24	0.46	0.28	1.24	-0.56	0.09	-0.25	-0.53	-0.48	-1.14	0.39	0.15	-0.17	0.67	0.53	1.06	0.49	0.53	0.35
RAPGEF4	-0.65	0.74	0.02	-0.42	-1.54	-0.59	-1.38	-0.6	-0.08	1.29	-2.26	-0.95	-0.22	-0.91	0.24	-0.93	-0.18	-0.94	-0.45	-0.41	-0.29	1.08	0.45	-0.84	-0.3	-0.83	-0.62	0.17	1.07	0.16	0.59
RBMXL2	-1.38	-0.57	-1.24	-0.79	-1.54	1.22	1.79	0.83	1.45	-0.04	0.1	1.02	0.02	1.73	-0.19	0.17	-0.11	0.31	-1.11	0.22	0.43	-0.73	0.22	0.17	0.77	1.11	1.3	-2.13	1.79	1.05	1.59
RETNLB	-0.97	-0.78	-1.47	-0.53	-1.54	1.07	-1.5	0.93	0.26	0.64	0.52	0.12	-0.09	0.19	1.16	-0.54	0.2	-0.2	-1.08	-0.27	0.23	-1.42	-1.2	-0.89	-1.44	-1.32	-1.58	-0.67	0.1	0.51	-0.29
SAR1B	0.23	-1.55	-1.1	-1	-1.54	-1.16	-0.17	0.2	0.12	0	-2.09	-0.55	-0.52	-1.37	0.1	-0.11	-0.17	0.49	0.22	-1.44	-0.66	-1.11	1.84	0.66	0.67	0.3	0.92	1.05	-1.12	1.83	0.36
SEMA4B	-1.87	-0.06	-0.39	-1.67	-1.54	0.68	1.22	0.16	-0.46	0.37	-0.54	-0.69	0.01	-0.13	0.25	-0.3	0.03	-0.04	-0.63	-0.51	-0.82	0.09	-0.2	0.21	-0.14	1.01	1.16	0.53	1.5	1.32	0.64
SPG21	0.2	1.83	1.01	0.55	-1.54	-0.16	1.45	-1.22	0.79	-2.43	-0.75	0.24	0.82	-0.06	-0.27	0.14	-0.46	-1.66	-0.47	0.34	-0.8	-0.39	-0.71	0.27	-1.07	-2.18	-0.49	-1.82	0.68	-0.24	2.02
STRC	-0.97	-0.8	-1.56	-1.26	-1.54	-2.7	0.26	-1.21	-0.28	-1.36	-0.4	0.39	-0.27	0.26	-0.17	-2.73	-0.41	-0.21	-0.05	-0.74	-1.59	0.02	-1.97	-0.93	-2.95	-1.6	-1.57	-0.77	0.71	1.73	3.12
ZNF496	-1.13	-1	-1.81	-1.88	-1.54	0.19	-1.2	-0.17	-0.94	-0.24	-1.02	-0.65	0.63	0.79	0.62	0.08	0.15	-0.04	-0.6	0.39	0.25	0.96	0.99	0.59	0.61	1.42	0.83	-0.01	0.83	0.75	1.23
AADACL4	0.59	-0.44	0.49	-0.16	-1.53	1.27	0.17	0.71	0.01	0.07	0.39	0.85	0.63	0.13	-0.15	-1.34	1.17	-0.25	-0.52	-0.25	0.99	-0.2	-0.62	-0.09	0.44	0.13	-0.76	-0.16	0	0.72	-0.28
AIP	-0.66	-1.01	-0.65	-1.51	-1.53	-4.33	-2.55	-4.01	-2.34	-2.46	2.92	-0.14	1.53	-0.8	-0.39	1.38	2.96	-2.13	-3.6	-1.67	-3.93	-3.79	-1.53	-3.63	-0.85	-1.27	-4.13	-4.38	-0.94	-4.8	0.27
ANKRD28	-0.7	-0.67	0.31	-0.26	-1.53	-0.5	-1.27	-0.9	-0.71	-0.5	-0.98	0.59	1.38	0.18	-1.4	-2.32	-0.85	-0.02	0.73	-0.5	-1.52	-1.9	0.23	-0.48	-0.29	0.83	0.38	0.15	-1.25	-0.55	-0.49
EXTL2	-0.15	-0.39	-0.59	0.12	-1.53	-0.32	1.19	-0.41	-0.1	0.63	-0.92	-0.9	-0.45	0.73	-0.84	1.15	-1.7	-0.55	-0.93	-1.21	-0.47	0.13	0.71	-0.18	0.53	0.1	-0.33	0.5	0.09	0.62	1.21
FRYL	-0.69	-2.78	-0.42	-0.13	-1.53	-3.62	-10.74	-1.88	3.04	-8.01	-3.02	-2.17	1.61	0.16	-0.02	-5.78	-0.01	-0.71	-3.63	-1.12	1.53	-2.73	2.21	-3.86	0.67	-3.53	0.09	-1.16	-0.93	-4.46	0.36
GJD4	0.11	1.22	0.87	0.9	-1.53	0.89	1.19	1.6	1.83	1.46	0.99	0.86	0.62	2.66	0.95	-1.18	0.77	0.61	-0.76	-0.38	-0.72	-1.02	0.87	-0.29	0.24	-0.35	-1.71	0.65	1.41	1.11	-1.18
GOLPH3L	-0.42	-0.75	-1.28	-1.6	-1.53	-0.8	-1.42	-0.98	-0.6	-0.76	2.14	1.19	0.08	1.57	-0.37	-0.04	-0.28	-0.62	-0.51	-0.26	-0.37	-0.58	0.82	-0.12	-0.31	0.48	0.59	-0.48	0.04	0.07	-0.23
ITIH6	-0.3	0.47	-0.33	-0.52	-1.53	0.65	0.17	1.53	0.12	0.18	-0.92	-0.56	0.26	0.68	-0.21	-1.64	1.57	-0.15	-0.74	0.33	1.15	-0.71	-0.1	-0.03	0.5	0.73	1.17	-1.42	0.6	-0.21	0.72
KCNH6	-0.51	-1.57	0.59	-0.03	-1.53	0.75	1.28	1.03	1.83	0.42	-1.71	-0.87	-1.37	-0.21	-0.51	1.59	1.61	0.88	0.75	1.46	-0.02	-0.29	0.07	-0.09	0.57	0.11	-0.21	0	1.52	-0.94	0.77
KIF17	-2.35	-1.42	-1.21	-1.77	-1.53	-1.43	0.03	-1.11	-1.44	-0.86	1.66	1.88	-0.83	-0.17	0.19	0.77	1.06	0.95	-0.17	-1.06	-0.89	0	1.28	0.48	0.59	0.79	1.63	-0.17	0.35	0.63	-0.67
MTHFD2	-3	-0.84	-1.75	-2.74	-1.53	0.21	0.71	1.99	0.08	1.27	0.3	0.82	0.08	-0.3	0.39	-0.44	0.85	0.46	-0.41	-0.73	-1.31	0.99	0.97	-0.03	1.08	0.89	0.35	0.65	0.53	-1.16	-0.23
MUC5B	-1.81	0.11	-1.34	-0.6	-1.53	1.64	1.12	-0.47	2.35	0.53	0.14	0.22	-1.09	-0.29	-1.15	1.72	-0.41	0.75	0.72	-0.51	-0.26	0.48	-0.81	0.7	-0.08	-0.11	-0.46	-0.39	0.75	0.28	1.82
NKD1	-1.06	-0.62	-1.02	-1.63	-1.53	-1.11	-0.96	-1.27	-1.94	-1	0.53	1.65	-0.17	1.11	0.16	1.77	-0.13	-0.4	-1.46	-0.18	-0.3	0.47	0.59	0.59	-0.21	1.05	0.71	-1.45	1.11	0.4	0.85
PITPNA	-0.53	-0.79	-1.01	-0.71	-1.53	-1.12	-0.5	-0.41	-0.68	-0.63	1.38	1.03	-0.71	0.53	0.1	0.68	0.74	0.69	-0.05	-0.98	-0.44	1.48	-0.41	0.7	0.07	-0.33	0.02	0.95	0.59	0.2	1.72
POLH	-1.81	-0.31	0.19	-0.07	-1.53	0.82	-1.17	-2.34	-0.69	-11.01	0.52	0.3	0.08	-2.6	-2.82	-3.17	-0.12	0.61	0.71	1.04	-0.36	-0.24	-0.17	0.74	-3.61	-0.19	-1.52	-0.19	0.28	-1.6	-0.96
PRPSAP2	-0.4	-0.29	-0.77	-0.97	-1.53	-0.71	-0.38	-0.46	-0.89	-1.08	0.1	-0.48	-0.82	0.11	0.52	0.59	0.04	0.3	-0.27	0.26	0.61	-1.42	0.33	0.44	0.49	0.06	0.51	-0.74	-0.48	0.17	0.58
RAB1A	0.2	-0.5	-1.15	-0.88	-1.53	0.47	1.51	0.84	0.81	-0.53	0.82	1.07	-0.83	0.31	0.05	-2.1	0.01	0.73	-0.05	-1.04	-0.75	-0.15	-2.09	-0.54	-0.29	-1.92	-0.12	-0.86	0.35	0.07	-0.23
RNF38	-2.11	-1.74	-1.32	-1.57	-1.53	-0.41	0.03	0.33	0.48	-0.29	-0.15	-1.2	0.02	0.64	-0.27	0.95	-2.07	-1.73	-0.36	-0.45	-0.03	-0.59	0.05	-0.52	0.02	-0.68	0.06	-0.3	-1.03	0.35	-1.66
RPS9	-0.44	-0.43	0.26	0.16	-1.53	0.08	1.46	-0.24	-0.01	0.06	NA	NA	NA	-0.23	0.24	-0.55	-0.04	-0.53	0.83	0.74	1.9	-0.6	-0.47	-0.05	-0.5	-0.56	-1.21	-0.12	0.05	0.82	-0.44
SAMD12	-1.66	-0.64	-0.88	-1.86	-1.53	-0.68	-1.58	-1.13	-0.14	-0.23	0.08	-0.4	-0.65	-0.14	-0.14	0.22	1.22	0.07	0.5	-0.05	-0.15	-1.47	0.14	-0.52	-0.88	-0.28	0.51	0.48	1.03	-0.32	-0.89
VPS13B	-1.17	-1.52	-1.38	-1.43	-1.53	-0.39	-0.57	0.38	-0.92	-0.37	0.74	-1.38	-0.64	-0.6	-0.47	-0.93	0.24	-0.87	0.89	-1.25	-0.71	-0.88	-0.2	0.15	-0.15	0.15	2.07	0.34	-0.91	0.44	0.91
ACHE	-0.49	0.62	-0.13	0.98	-1.52	0.03	0.12	0.29	-1	0	-0.35	1.15	0.57	0.22	-0.15	-0.58	-0.22	-0.78	0.62	0.12	-0.05	0.82	0.36	-0.65	0.9	-0.09	0.09	-1.07	0.77	0.12	0.49
ACTRT3	0.04	-1.03	-0.39	0.24	-1.52	0.19	-1.28	-0.13	-0.38	-0.55	0.33	-0.2	0.67	0.37	0.96	-1.27	0.11	0.77	0.12	0.46	1.37	0.89	0.87	0.15	1.83	-0.09	0.39	-1.2	-0.65	-1.09	-1.06
AHNAK2	-0.98	-0.12	-1.09	-1.54	-1.52	-0.13	-0.24	-0.44	0.06	-0.3	0.57	-0.83	-0.98	-0.03	-0.68	1.46	-1.41	0.44	-0.4	-1.4	-2.07	0.14	-0.97	-0.49	-1.58	-0.46	-1.57	0.1	-1.31	-1.2	-1.12
AP1S3	-0.56	-0.87	-2.05	0.18	-1.52	0.37	0.26	0.92	0.64	0.27	1.18	0.49	-0.24	-0.58	-1.68	-0.16	-0.55	0.55	0.59	0.26	1.18	0.91	0.83	0.51	0.35	0.63	1.41	-0.72	-0.46	-0.98	-1.01
C15orf40	-0.79	0.31	-1.06	-0.82	-1.52	-0.83	0.54	-0.73	-0.06	1.73	-2.07	-0.38	0.84	-0.98	-0.33	-0.4	-1.14	-1.05	0.63	-0.27	-0.55	0.27	-0.45	-0.63	-1.31	0.01	-1.21	0.17	-0.65	-0.82	-0.01
C2orf68	-1.39	-1.42	-1.8	-0.09	-1.52	-0.04	0.43	0.89	-0.26	1.52	-0.27	-0.68	0.64	-0.87	-0.4	-0.05	-1.67	0.05	0.12	0.15	-0.43	0.89	-0.59	0.39	0.23	0.75	-0.66	1.12	0.26	-1.23	-0.89
CD300LB	0.85	0	-0.08	0.08	-1.52	0.65	-1.15	-0.13	-0.59	-0.27	-0.68	-1.16	0.39	-0.12	-0.35	0.46	-0.01	0.57	0.81	0.8	1.46	0.25	0.72	0.87	0.52	1.03	0.9	-1.09	-0.91	-0.45	0.46
CNOT7	-0.36	-1.85	-0.95	-0.71	-1.52	-1.15	-1.78	-1.15	-0.71	-1.41	0.47	0.92	-0.65	-2.21	-2.82	-1.14	-0.55	-1.16	-2.4	-1.04	-1.25	-0.64	-1.55	-1.07	-1.52	-1.68	-2.75	-0.64	-0.24	-0.21	-1.69
EIF4G1	-0.58	-0.03	0.37	1.3	-1.52	1.15	1.46	1.4	0.86	0.71	1.03	1.52	0.42	1.11	-0.2	1.06	0.79	0.23	4.49	3.05	3.45	0.19	-0.13	3.89	1.93	1.02	0.31	0.31	0.2	0.53	0.13
EIF4G3	1.47	0.02	0.97	0.64	-1.52	0.68	-0.32	0.65	0.45	-0.04	0.73	-0.04	-0.01	0.49	-0.11	-0.37	-0.67	-0.33	-0.04	0.01	-0.3	-0.76	0.55	-0.26	-0.19	-0.86	-0.73	-0.11	-0.1	-0.11	0.56
EML5	-0.89	-1.9	-2.1	-1.35	-1.52	-1.01	-1.11	-0.48	-0.9	-0.5	0.48	-0.63	-0.06	1.49	0.1	-1.17	-0.8	-1.3	0.02	0.04	0.21	-0.52	0.99	0.99	0.68	0.77	0.94	-0.1	-1.65	-0.47	-0.88
EPB42	0	-0.65	-0.37	1.06	-1.52	-0.16	0.79	0.35	0.26	1.05	-2.09	-0.42	1.14	0.85	0.18	-1.13	0.33	-0.38	-0.68	-0.66	-1.12	1.12	-0.63	-0.11	-0.06	-0.53	-0.14	-1.61	-0.98	-0.52	-0.11
FAM217B	-0.94	-1.08	-1.5	-1.55	-1.52	-0.64	-0.19	-0.8	-1.24	-0.79	-0.96	-0.25	1.41	0.34	0.62	-0.31	-1.04	-2.3	-1.48	-1.63	-0.38	-0.12	-0.14	-0.81	-0.66	-0.1	-1.35	-0.82	0.73	-0.84	0.91
FRMPD1	0.6	0.01	-0.12	0.34	-1.52	0.94	1.35	0.16	0.6	0.55	-0.07	-0.77	0.24	-0.46	0.6	0.56	0.16	-0.16	0.28	-0.63	-0.44	0.58	-0.29	-0.35	0.05	0.88	-0.18	1.34	-1.34	0.36	0.18
GNG11	-1.3	-2.32	-2.59	-2.6	-1.52	-1.68	-1.68	0.06	0.01	-0.53	-1.24	-0.96	0.1	-0.9	-0.4	0.18	0.97	1.68	0.2	0.49	-0.6	-1.31	0.71	0.88	0.72	1.04	1.11	1.05	-1.17	0.17	0
KDELC2	0.05	-0.18	-0.61	-0.23	-1.52	0.83	0.8	1.15	0.07	0.55	1.65	1.01	-0.64	-0.28	0.76	-0.47	1.22	-0.05	0.25	-0.15	0.52	1.07	0.78	0.51	-0.05	0.01	0.81	0.11	-0.97	-0.57	-0.9
KLK12	-0.47	-2.03	-1.03	-0.44	-1.52	1.67	0.26	0.76	0.52	0.81	-0.66	0.13	0.36	0.05	1.28	-2.08	0.07	-0.55	-0.67	0.71	0.58	0.8	1.22	0.92	0.95	0.44	2.35	-0.18	1.44	-1	0.07
NDUFAF7	0.14	-0.41	-2.11	-0.23	-1.52	-0.64	-1.94	0.04	-0.8	-1.2	-0.11	-1.84	1.17	-1.11	1.06	-1.85	1.04	0.68	0.43	-0.57	-0.82	0.58	0.66	-0.67	1.86	0.29	1.22	0.25	-1.31	-0.61	-1.57
OR4K14	0.83	-0.5	-0.42	-0.79	-1.52	-0.32	0.2	-0.29	0.4	0.76	0.36	-0.87	0.32	-1.26	0.63	-0.45	0.54	1.66	0.42	0.07	-0.4	-0.36	-0.2	-0.32	-0.64	-0.16	-0.63	-0.52	-0.26	-0.64	0.73
PHLDA1	0.33	-0.04	0.21	0.62	-1.52	1.1	2.31	1.5	2.31	0.79	0.85	1.21	-1.84	-0.21	0.05	0.83	0.74	0.67	0.12	0.13	-0.26	-0.87	-0.59	-0.62	0.36	0.05	-1.07	-0.11	0.94	-0.64	-0.26
RPL38	-2.08	0.71	-2.14	-0.51	-1.52	0.3	0.9	0.15	0.2	-0.79	-0.36	-0.29	1.12	-0.61	-1.71	-0.27	-0.3	-1.25	3.32	3.15	3.31	0.91	-0.46	-3	-1.04	-1.54	-1.11	-0.15	-2.12	-1.17	1.42
SEPW1	-0.26	-1.28	-0.91	-0.33	-1.52	-0.9	0.4	-0.09	-0.68	-0.07	0.18	-0.18	0.86	-0.73	-1.62	-0.06	0.53	1.06	0.65	-0.14	-0.74	-0.56	-0.23	0.47	-1.05	-0.89	-0.64	0.07	-0.14	0.25	0.7
TRIM43	-1.09	-3.02	-1.72	-1.81	-1.52	0.21	1.25	-0.05	0.97	-1.07	0.38	0.34	-0.29	-2.73	-0.61	0.13	-1.12	-0.19	-0.01	-0.77	0.43	0.37	0.56	-1.3	0.03	-0.1	0.28	-0.93	0.06	-0.35	0.87
TRPM6	-1.99	-2.22	-1.06	-1.64	-1.52	-0.45	-0.47	-0.92	-0.06	0.29	0.82	1.02	0.07	0.34	-0.01	-0.38	-0.22	0.41	0.29	-0.98	-0.54	0.02	-0.98	0.56	-0.97	-1.08	-0.21	0.92	-1.93	0.07	-0.15
ZNF839	0.14	-1.1	0.1	0.69	-1.52	-0.23	0.03	0.34	-1.84	-1	0.17	0.96	1.62	0.65	-0.96	1.11	-0.81	-0.17	0.5	0.85	0.88	-0.11	-0.01	0.28	0.38	-0.34	0.74	-0.42	0.22	-1.09	-0.64
ARL14EP	-0.2	-0.2	-1.28	-0.93	-1.51	0.78	-0.49	-0.42	0.32	0.29	-0.78	-1.3	-1.35	1.84	-0.1	1.02	-0.05	0.54	0.67	0.12	-0.29	-0.9	0.52	0.75	-0.3	0.73	-0.23	-0.28	0.69	-0.38	0.36
B4GALT5	-0.56	-0.59	-1.5	-0.6	-1.51	0.84	0.5	0.41	-0.91	0.76	2.11	1.95	0.49	0.22	-0.27	1.54	0.72	-0.42	0.11	0.83	-0.38	-0.5	-1.44	-0.3	1.09	0.63	-1.51	0.05	0.25	2.23	-0.12
BCAR3	0.74	0.18	0.03	0.43	-1.51	-0.32	0.4	-0.46	-0.2	-1.63	1.33	-0.37	-0.12	-0.35	-0.24	-0.2	1.15	1.48	-1.18	0.51	0.14	-0.54	0.9	1.35	0.54	0	1.61	-0.92	-0.52	-0.47	0.06
BCL7A	-0.21	0.99	1.23	1.12	-1.51	-0.16	-0.01	-0.75	-0.69	-0.21	0.87	1.71	-0.3	0.12	0.01	0.49	0.28	-0.05	-0.71	-0.66	-1.37	-2.57	0.45	-0.31	0.67	-0.37	1.17	0.07	1.17	0.15	-0.5
CDA	-1.2	0.13	-1.71	-0.69	-1.51	-0.75	-0.35	-0.93	0.79	0.48	-1.21	0.1	-1.33	-0.81	0.2	0.35	0.04	0.71	0.88	-0.34	0.31	-0.1	0.29	0.14	-0.2	0.35	0.49	0.33	0.57	0.79	1.33
CDADC1	-0.2	-1.3	-0.95	-1.35	-1.51	-1.34	-2.03	-1.02	-1.76	-1.35	-0.78	0.18	-0.29	0.89	0.17	0.58	-0.1	0.23	0.22	-0.54	-0.14	-1.58	-0.02	-0.78	0.68	-0.01	0.01	-0.45	0.08	0.82	-0.77
DNAH1	-1.2	1.08	0.37	0.22	-1.51	0.73	0.9	0.93	0.7	0.84	1.39	1.82	0.09	0.09	-0.26	0.24	1.44	1.17	0.24	0.33	0.79	0.69	-0.71	-0.14	-0.39	-0.21	-0.03	-0.59	1.02	1.26	0.33
ERAS	0.2	-0.58	-0.63	0.11	-1.51	-0.16	0.84	0.41	-0.46	0.24	-1.06	-0.01	-0.74	-0.28	0.39	0.1	0.98	-0.29	-0.45	0.07	0.81	0.48	0.52	-0.28	0.87	0.28	-0.03	1.04	-1.36	-0.55	-0.45
F2RL3	0	0.01	0.46	0.68	-1.51	-1.97	0.62	-0.52	-0.32	-0.86	0.87	1.26	-0.05	-0.31	0.37	-0.66	1.12	0.37	-0.6	0.46	0.53	-1.29	-1.98	-0.47	-0.01	-1.06	-0.74	0.09	0.16	-0.25	-1.09
FAM160B1	-0.85	-0.69	-1.3	-0.94	-1.51	-0.89	-0.05	-0.36	0.29	-0.14	-1.21	0.16	0.17	0.19	-0.23	-0.24	-0.92	-0.56	-0.29	0.84	1.05	-0.43	0.63	0.59	0.85	1.26	0.99	-1.31	-0.03	-0.58	-0.07
HAUS3	-1.39	-0.57	-1.83	-2.59	-1.51	-0.68	0.71	0.45	0.38	0.82	-1.92	-0.41	-1.56	0.44	-1.67	-0.43	1.47	1.87	1.55	1.25	0.63	-0.9	-0.29	-3.47	-0.94	-2.42	-3.95	-1.57	1.11	0.44	-1.61
IL6R	-0.41	-0.02	-0.22	-0.56	-1.51	0.81	1.23	0.05	0.09	0.85	-0.43	0.06	0	0.72	0.24	1.45	1.26	0.43	1.1	1.01	0.41	0.65	-1.18	-0.65	0.71	0.34	-0.15	-0.54	-0.03	0.8	-1.03
JMJD6	-2.26	-2.08	-2.05	-1.87	-1.51	-0.5	0.49	-0.21	-0.87	0.73	0.26	0.57	0.36	-1.91	-2.52	0.56	0.55	1.58	1.45	0.72	1.52	-0.22	-1.38	2.09	-1.58	-1.26	-1.32	-3.05	0.48	2.27	0.7
KLHL15	-0.55	-1.92	-1.45	-0.41	-1.51	-1.42	-2.2	0.32	-1.98	-0.26	-0.68	-1.16	0.24	0.52	0.84	0.73	-0.38	-0.3	-0.83	-0.47	-0.42	-0.43	0.99	-0.84	0.28	-0.5	0.68	-0.67	1.15	0.05	1.68
NALCN	-0.24	-0.71	-0.14	-1.06	-1.51	0.63	-0.38	1.28	1.02	0.99	-2.58	-1.87	0.01	-0.17	-1.17	-1.25	0.51	-0.75	0	-1.24	-0.84	-1.82	0.44	0.08	-0.96	0.18	0.53	1.26	-0.09	-0.25	-0.1
NLRP6	-0.48	-2.05	-0.53	-0.34	-1.51	0.48	-0.59	-0.8	-1.19	-0.92	0.01	-0.64	1	0.19	0.4	-0.39	0.37	-0.03	-0.85	0.79	0.57	-0.33	1.05	0.44	0.73	-0.1	-0.59	-0.73	1.18	0.3	0.85
NT5C2	-1.79	-0.68	-0.34	-0.92	-1.51	0.77	0.55	0.07	-0.42	0.4	-0.34	0.27	0.18	0.34	-0.03	0.17	-0.18	-0.56	-0.63	0.06	-0.91	0.88	0.77	0.48	1.44	-0.43	0.11	-0.56	-0.59	0.56	0.79
OR52H1	-1.06	-0.79	0.07	-0.43	-1.51	-0.64	0.84	0.25	0.39	0.47	0.17	-1.33	1.11	0.21	0.83	0.53	-0.07	-0.76	-0.97	-0.45	-0.14	-0.43	0.7	0.39	0.53	1.56	-0.03	-1.24	-0.07	0.2	1.64
PEX11A	-0.87	-0.63	0.05	-1.01	-1.51	0.91	1.88	1.13	1.67	1.46	-0.47	0.56	-2.23	-0.26	0.13	-0.69	-1.5	-1.32	-0.5	-0.91	-0.98	-1.05	0.17	-0.14	-1.47	0	0.79	0.95	0.44	1.29	0.28
PGGT1B	-0.3	-1.64	0.32	-0.62	-1.51	0.69	-0.34	-0.14	0.3	0.32	-0.01	0.3	-0.31	-0.56	-0.36	-0.98	-1.44	-1.21	2	1.65	1.62	-0.27	0.85	1.15	0.2	0.31	1.35	-0.96	0.39	1.27	1.45
PRNT	-0.03	-2.39	-0.34	0.27	-1.51	-1.14	-0.64	-0.97	0.11	-0.15	1.26	1.09	0.25	0.81	-1.71	-0.64	0.46	0.62	-0.45	-0.1	0.22	-0.86	-1.02	-0.13	-0.8	-0.61	-0.38	-0.9	-1.63	-1.31	-0.63
PTGR1	1.36	0.36	1.29	1.11	-1.51	-0.57	-1.21	-1.15	-1.27	-0.66	0.13	-0.77	0.98	-0.46	-0.56	-0.3	1.35	0.6	-0.5	-0.3	-0.12	-1.51	7.56	-0.25	0.42	0.88	1.66	0.5	-0.08	0.37	1.54
RIOK2	0.1	-0.91	-1.62	-1.51	-1.51	1.13	0.83	0.47	0.22	-0.08	0.13	0.33	0.29	0.24	0.72	-1.11	0.47	0.32	3.32	3.43	3.69	-0.85	-0.47	0	0.23	0.59	-0.82	0.69	-0.55	0.61	-0.59
SERPINA10	-0.15	1.36	-0.19	-1.04	-1.51	0.57	0.84	1.32	-0.29	1.03	-0.4	0.87	0.03	-0.56	1.03	-0.11	-1.03	0.15	-0.36	-0.98	-0.34	2.16	0.59	0.63	0.21	1.15	0.54	0.9	-0.2	0	-0.14
SNX7	0.29	-0.17	-0.16	-0.42	-1.51	-0.04	-0.31	0.44	-0.08	0.71	-0.33	0.72	0.25	0.82	0.81	0.1	-0.77	-0.68	-0.37	-0.48	-0.39	-0.83	-1	0.19	0.3	0.25	-0.52	0.33	-1.22	0.45	-0.2
STRA13	-1.97	-2.19	-1.27	-1.65	-1.51	1.25	0.37	-1.54	0.07	0.25	0.37	-0.34	-2.16	-3.18	-2.9	0.33	-0.46	-0.82	0.03	-0.79	-0.41	-2.95	-0.44	-3.05	-4.4	-0.83	0.72	-3.8	0.19	-1.43	-0.12
STX8	-1.57	-0.32	-0.67	-1.74	-1.51	0.85	0.49	1.41	1.46	1.22	0.06	0.31	-0.94	0.09	0.88	0.13	-0.05	-0.6	0.02	0.15	0.63	-0.45	0.39	0.67	0.99	0.6	-0.12	-1.04	0.19	0.49	0.91
TOP3B	0.06	0.01	-0.79	-0.65	-1.51	-1.32	-0.57	-0.88	-0.43	0.54	0.16	0.75	-0.44	0.08	0.02	0.97	-0.77	-0.69	-0.16	-0.77	0.15	0.34	-0.18	-1.18	-0.56	0.22	-1.06	0.28	-0.93	0.46	-0.04
TPM1	-0.59	-1.33	-0.73	-0.88	-1.51	0.02	0.83	-0.98	0.11	-0.93	-0.59	0.51	-0.62	-0.27	-1.33	-1.73	0.38	-0.08	-0.24	0.13	-0.29	-0.35	-0.41	-0.85	-0.84	-0.69	-0.41	-2.91	-0.44	0.05	-0.53
UBL7	0.55	-0.98	-0.33	-0.22	-1.51	0.36	0.81	0.1	-0.71	1.24	-0.06	-1.08	-0.34	-2.58	-0.99	1.03	-0.5	1.01	2.67	0.88	0.41	-2.65	-0.8	0.98	-0.45	0.75	-0.26	-0.51	-0.63	0.71	-1.55
UNC79	-1.25	-0.32	-1.25	-1.28	-1.51	-0.14	0.99	0	-0.41	0.48	-0.65	-0.62	-1.47	-0.34	-0.35	0.44	0.05	0.82	0.14	0.27	0.69	0.58	0.4	-0.64	0.74	0.66	0.99	0.1	0.59	-0.66	-0.29
UPP1	-0.79	0.48	-0.55	-0.56	-1.51	1.01	-0.28	0.3	0.32	0.82	-0.1	0.29	0.19	1.41	0.08	0.09	-1.99	-0.86	-0.73	-0.17	-0.21	1.17	0.46	0.67	0.56	-0.2	0.99	-0.68	-1.04	-0.27	0.22
WSB1	-1.7	-0.95	-1.55	-1.33	-1.51	1.14	0.5	0.55	1.15	0.19	0.37	0.9	0.4	0.41	0	0.64	-0.1	0.67	-0.18	-0.62	0.1	2.08	0	0.64	0.37	0.76	1.11	-0.38	1.6	-1.1	-0.09
ZDHHC5	0.24	-1.24	-0.24	0.35	-1.51	-0.73	1.59	1.19	-1.73	-0.87	0.15	-0.56	-1.44	1.46	0.06	0.07	0.36	-1.29	-0.42	0.15	-0.71	-1.39	-1.38	0.13	0.93	0.13	0.45	-2.43	0.42	1.4	0.49
BAD	-1.19	-1.1	-2.05	-1.93	-1.5	0.85	0.61	-0.37	-0.07	0.35	-0.27	0.29	-0.09	1.05	0.09	0.87	-0.59	0.26	1.67	-0.01	-0.16	-1.53	-0.92	-0.14	0.24	-0.42	0.36	-0.6	1.93	-0.46	0.57
CDC25B	-1.9	-0.44	-2.67	-0.39	-1.5	-2.94	-0.3	-0.87	-1.95	-0.72	-0.68	0.07	2.78	-1.18	-2.94	-1.31	0.44	0.38	-0.46	-0.69	-0.74	0.21	-0.58	-0.97	-0.81	-0.23	-0.69	-6.17	-0.95	0.24	0.75
CLDN1	0.13	-1.12	0.54	0.41	-1.5	-1.29	-1.74	-0.95	-1.07	-0.17	-0.03	-0.72	0	0.37	-0.1	0.4	-0.57	-0.07	-0.51	0.43	0.08	-0.92	1.08	0.53	0.6	0.3	0.06	0.18	0.44	0.46	0.55
CRNN	-0.22	-2.03	0.05	-1.23	-1.5	0.59	0.85	0.74	1.7	0.56	0.41	0.18	-0.76	0.96	0.4	0.62	1.15	-0.26	-0.39	-0.69	-0.53	0.22	-0.2	0.16	0.18	1.03	0.12	-0.01	-1.91	-1.19	-1.74
EVC	-0.1	0.29	-0.35	0.64	-1.5	-0.22	0.83	0.19	-0.2	-0.69	1.06	-0.38	0.75	-0.18	-0.42	0.53	-1.08	-0.54	-1.7	-0.97	-1.05	-0.24	-0.22	-0.53	0.3	0.53	-0.43	0.7	-0.2	-1.15	-1.57
FPGS	-0.59	1.4	0.08	0.34	-1.5	-0.4	1.39	0.8	-0.38	1.08	1.21	0.07	0.15	0.59	1.04	1.41	0.44	-0.79	-0.82	-1.03	-0.54	0.47	-0.32	-0.43	-0.42	0.19	-0.09	0.18	0.78	-0.46	0.45
HMGN5	-1.58	0.65	-1.75	-2.21	-1.5	-1.53	-0.99	0.21	-1.37	-0.28	-0.99	0.17	-0.5	0.71	1.12	-0.78	-0.18	-0.98	-0.8	0.19	-0.17	0.15	-0.02	0.29	0.08	0.46	0.23	-0.73	0.21	-0.17	0.98
INO80E	-0.19	0.42	-0.36	-0.6	-1.5	-0.75	0.33	1.21	0.02	0.92	1.3	2.16	-1.75	-0.79	0	-0.43	2	1.5	-1.6	0.06	0.22	0.16	0.19	1.02	0.7	0.84	0.83	-0.55	-0.39	-0.55	-2.45
MAP10	-1.23	0.25	-2.27	-0.98	-1.5	-1.23	-1.88	-1.94	-2.34	-0.73	0.99	-0.04	-0.43	-0.31	0.82	-0.34	-1.42	-1.46	-1.49	-0.79	-0.52	-0.55	-0.57	-0.66	0.12	-0.52	-0.68	-0.81	1.17	1.88	2.47
MORF4L1	-0.77	-2.62	-1.89	-1.64	-1.5	-1.7	0.12	-2.02	-0.25	-1.85	-0.21	-0.2	-2.72	-1.21	-1.39	-1.8	-1.88	0.31	-2.16	-1.53	-0.77	-0.61	-0.6	-1.85	-1.06	-0.26	-0.03	-3.05	-0.77	-1.3	-0.27
OR9I1	0.42	0.49	-0.39	0.65	-1.5	-0.36	0.6	0.27	-0.22	1.1	-1.16	-0.27	-0.88	-1.21	0.45	1.24	1.46	1.95	0.98	-0.8	0.01	-0.12	-0.44	-0.37	0.05	0.21	1.07	0.18	-0.09	0.04	-0.1
RANBP10	-1.15	-1.21	-0.27	-1.29	-1.5	0.66	0.36	0.21	-0.47	-0.53	0.76	-0.52	-0.57	0.17	0.01	0.88	-0.76	-1.36	-0.3	-0.33	-0.91	-0.09	-0.37	0.68	-0.37	-0.63	-0.17	-0.32	-0.01	-0.65	-0.12
RBM20	-1.02	-0.46	-1.14	-1.2	-1.5	-0.77	1.5	-0.33	-0.5	-0.95	-0.07	-0.03	0.57	0.54	-0.28	0.09	1.79	0.66	-0.58	-0.19	-0.11	1.28	-0.38	0.5	-0.22	-0.3	-0.6	0.54	-1.73	-0.27	0.66
RGS3	1.23	-0.58	0.16	-0.61	-1.5	-0.09	-1.97	-0.62	0.23	-0.17	1.57	1.18	-0.44	0.2	0.93	0.77	1.86	1.21	0.54	0.72	0.33	-0.21	0.07	-0.09	-0.05	0.21	0.98	-0.19	0.29	1.34	1.3
SFN	0.26	-0.3	0.31	0.93	-1.5	1.38	1.32	0.16	0.34	0.97	0.41	-0.63	-0.41	-0.43	1.7	0.55	-0.68	-0.47	-0.57	0.37	-0.56	0.97	-1.26	0.09	-0.34	-0.64	-1.24	-0.37	1.29	0.73	0.79
SHC4	0.17	-1.58	-1.66	-1.43	-1.5	-1.68	-0.26	-0.72	0.26	-1.03	-2.31	-1.87	-0.2	0.84	-1.68	-1.65	-2.49	-0.67	-0.92	-0.28	-0.26	-0.39	-1.06	-0.85	-1.08	-0.69	-1.24	0.18	-0.36	-1.1	0.11
TCEB3	0.56	-0.81	-0.64	-0.18	-1.5	-0.53	-0.92	0.2	-1.37	-1.8	-1.85	-0.45	-1	0.79	0.54	0.76	-0.78	-0.15	0.87	-0.7	-1.36	0.77	-0.33	0.03	0.95	-1.46	-1.42	-1.26	-0.62	-1.07	1.25
BMF	0.99	0.04	0.61	0.25	-1.49	1.41	0.29	-0.62	0.21	0.13	-0.97	-0.12	-0.36	0.15	-0.25	0.63	0.59	0.04	0.69	0.69	0.78	-0.18	-1.29	-0.92	-0.43	-0.49	0.09	-0.95	0.53	0.51	-1.66
BTBD1	-1.24	-0.77	-0.84	-0.09	-1.49	0.27	-0.61	-0.19	-0.75	0.29	-1.51	0.11	0.69	1.25	0.69	0.31	0.23	-0.6	-0.74	0.19	-0.01	-0.41	-1.4	0.27	-0.38	0.41	-1.24	-1.27	-0.66	0.74	0.52
C19orf40	-7.91	-1.55	-0.77	0.51	-1.49	0.49	-1.07	-6.22	-1.44	-1.45	0.36	0.23	-5.5	-17.01	-15.08	0.28	-1.28	2.51	1.27	0.02	0.49	0.58	-2.7	-2.8	-14.63	-1.31	1.36	-5.52	-0.55	-0.73	-0.43
CLRN2	-1.98	-1.32	-0.48	-2.16	-1.49	0.52	0.51	0.61	1.42	-0.2	-0.59	-0.37	1.81	-0.83	-0.27	-0.28	-0.69	-1.58	-1.43	-1.12	-0.59	1.49	-1.71	-0.34	-0.13	-0.65	-0.64	0.46	-1.13	0.23	-0.92
ERMN	-1.24	-1.64	-2.24	-2.09	-1.49	0.19	-1.51	-0.47	0.05	0.09	1.71	-1.8	0.3	-1.08	-0.77	-0.39	0.59	0.6	0.7	0.09	-0.33	-0.38	-1.48	-0.68	-0.17	-1.54	-1.34	-0.47	-0.12	0.03	-0.28
FAM214A	-1.24	-0.24	-0.57	0.15	-1.49	-1.4	-1.31	-0.96	-0.22	-1.37	0.69	0.35	0.66	-1.47	-1.83	-2.68	-0.22	0.42	-0.99	-0.17	0.01	-1.21	-0.59	-0.37	-1.12	-0.03	-0.29	-0.57	-1.44	-1.3	-0.96
HIST3H2BB	-0.89	-1.28	0.52	0.6	-1.49	1.29	0.02	-0.09	0.26	0.53	0.52	1.2	-0.58	0	1.24	1.59	0.74	-0.02	-1.45	-0.61	-1.18	0.54	-0.98	0.2	0.04	0.57	0.29	-0.96	-0.53	-0.4	0.46
KBTBD3	0.13	0.36	-1.24	-0.93	-1.49	0.75	-0.63	0.68	-0.82	0.97	-0.34	-1.75	-0.69	0.96	0.61	-0.64	0.16	-0.23	-0.21	0.6	0.64	1.5	0.54	-0.38	0.09	0.2	-0.43	0.26	0.43	0.79	0.86
KCNRG	-0.4	-1.43	-1.41	-0.86	-1.49	-2.08	-1.64	-1.07	-1.14	-1.91	-2.51	-2.42	-0.34	-0.84	-0.04	-0.54	-0.31	-0.05	0.02	-0.24	0.15	-1.03	-0.83	0.25	-0.41	-0.03	-0.35	-0.3	0.59	0.38	0.62
MAPKAPK2	-1.58	-0.62	-1.31	-2.39	-1.49	-1.15	-0.46	-0.13	-0.81	-2.07	-1.37	-0.63	0.53	-0.5	0.32	-1.86	-0.48	-0.71	0.6	-0.14	0.2	0.4	0.35	-2.87	0.95	-0.45	1.28	-0.74	-0.36	-0.14	0.12
NCLN	0.11	-0.63	0.21	1.01	-1.49	0.96	-0.11	0.42	1.46	0.78	0.76	2.61	0.55	0.07	-0.21	0.69	-0.9	0.65	-0.12	-1.23	-1	-0.7	0.44	-1.52	-0.21	0.85	1.01	-0.3	0.63	0.35	-0.75
NOD2	-1.73	-1.95	-1.5	-3.21	-1.49	-0.04	-0.31	0.22	-0.76	1.32	-0.68	0.71	0.1	-0.73	0.11	0.76	1.91	0.58	-0.06	-0.07	0.28	-0.09	-0.47	-0.58	0.02	-0.05	0.45	0.04	-1.05	-0.17	-1.12
SCNN1B	-0.66	0.68	-0.5	-0.05	-1.49	-0.73	-0.97	-0.36	-0.08	-0.08	-0.23	0.73	-0.17	1.23	-0.43	-0.73	-0.21	0	-1.53	-0.87	-0.86	0.24	0.92	-0.03	0.5	0.01	0.44	0.15	0.83	0.04	1.08
SLC3A2	0.34	0.22	0.32	0.69	-1.49	0.02	0.38	0.72	0.17	1.25	1.33	0.08	0.32	-0.13	0.1	-0.12	0.35	0.27	0.1	0.03	-0.15	0.24	0.08	0.6	1.03	1.15	-0.31	0.96	-0.56	-0.36	-2.03
SNIP1	-1.92	-0.47	-0.55	-0.09	-1.49	0.24	-0.66	-1.58	0.03	-0.04	0.84	0.59	0.67	-0.85	0.87	1.38	-0.69	-0.55	-2.65	-1.23	-2.19	0.65	0.13	0.69	-0.57	0.46	0.66	-0.88	0.59	1.54	0.69
SRP9	0.33	0.34	0.56	0.07	-1.49	1.48	0.85	0.74	0.81	0.22	1.15	2.13	-0.04	0.33	0.79	-0.22	-0.29	-0.03	1.75	0.62	1.72	0.19	0.56	1.77	-0.35	-0.61	0.44	0.1	0.25	-0.42	-0.02
TAL2	0.56	-1.76	0.01	0.04	-1.49	-1.01	-0.28	0.22	-0.02	0.76	0.59	0.8	0.35	0.47	-0.27	0.16	-2.89	-2.01	-1.21	-0.57	-0.69	-1.49	0.12	-0.79	0.03	-1.42	-0.2	-1.21	-1.77	-0.91	-0.49
TMEM184B	-0.41	-0.42	-0.09	-0.58	-1.49	0.12	1.45	-0.26	0.76	0.74	0.79	0.43	0.29	-0.07	0.5	0.92	-0.25	1.31	-0.11	-0.32	0.2	0.55	-0.75	-0.56	0.19	0.47	-0.14	1.01	0.63	0.55	0.83
TTC31	-0.33	0.04	-0.48	0.29	-1.49	-1.05	0.37	0.37	-2.32	0.77	0.32	-0.13	1.13	-0.96	-0.65	0.32	-0.46	-0.91	0.4	0.74	-0.04	-0.51	0.75	0.02	1.55	0.77	-0.07	-0.67	-0.95	0.22	-0.47
WDR77	-1.83	-1.77	-1.18	-1.55	-1.49	-0.3	-0.19	-0.26	-0.44	0.25	0.7	0.72	-0.92	-0.84	0.81	-1.14	1.77	-0.23	1.89	3.12	2.02	-1.41	0.13	-0.06	-0.35	-0.48	-0.92	0.21	-0.72	-0.94	-0.08
AIRE	0.04	0.31	0.99	0.78	-1.48	1.32	0.9	1.11	1.41	0.65	-0.24	0.53	-0.05	0.52	-0.26	0.82	-0.05	0.21	0.09	0.68	0.81	1.14	1.21	0.38	0.06	-0.17	1.14	0.51	-0.07	0.21	-0.59
AKAP5	-1.03	-0.46	-2.09	-1.03	-1.48	0.94	1.14	0.2	0.82	1.4	-0.16	1.82	-0.6	0.24	0.53	0.66	1.08	-0.69	-0.11	-0.2	-0.29	0.05	0.04	0.36	-0.76	-0.28	-0.83	-0.14	-2.38	-1.63	-2.32
ATP6V0B	-0.18	-0.07	-0.52	-0.28	-1.48	-1.95	-0.8	-1.82	-2.01	-1.69	-0.4	-1.78	0.58	-0.11	-0.12	1.35	-1.06	-1.1	-0.22	-1.21	-0.79	-0.13	0.34	-0.62	-0.91	-1.06	1.57	0.03	0.08	-0.99	-1.06
BCL6	-1.8	-0.66	-2.48	-1.35	-1.48	-1.99	-1.1	-1.78	-1.41	-1.17	-0.09	-0.4	-1.54	-1.2	-0.21	-1.65	-0.04	0.11	0.39	0.07	0.28	1.84	-1.3	0.34	1.24	1.86	-0.37	-0.23	-3.27	-0.23	-1.37
C1orf189	-0.59	-0.72	-0.14	-1.32	-1.48	1.21	1.49	0.72	0.86	1.02	0.75	0.58	-0.97	0.03	0	1.12	-0.94	-0.68	-0.03	-0.34	-0.08	-0.9	-0.16	-0.05	-1.05	-0.28	-0.33	0.69	-1.46	-1.05	-0.85
CD84	0.36	-0.32	-0.05	-0.57	-1.48	1.67	0.21	1.14	1.12	0.05	1.01	0.53	0.54	0.96	0.02	0.29	-1.28	0.18	0.08	0.19	-0.42	-1.28	0.85	0.7	1.43	-0.11	1.32	0.51	-0.55	-0.17	0.24
CNR2	-0.92	-0.3	-0.24	-1.08	-1.48	0.48	0.36	0.23	-0.03	0.57	0.08	1.23	0.54	1.49	0.88	3.02	-0.22	0.42	-0.41	0.17	0.57	2.03	0.72	0.62	0.7	1.13	0.53	-1.06	0.83	1.24	1.05
COL20A1	-0.93	-0.42	-1.46	-0.1	-1.48	-1.05	-0.49	-1.39	-2.62	-0.39	-0.61	-0.43	0.25	0.12	-0.05	1.64	0.83	0.09	-0.69	0.29	-0.1	-0.09	0.22	-0.61	0.35	-1.15	0.21	-0.77	-0.35	-0.76	-1.13
GPR98	0.02	0.1	-1.12	-0.8	-1.48	0.27	-1.18	-0.61	0.27	-0.59	-1.85	-3.04	-0.97	0.35	0.62	-0.68	-2.19	-1.44	-0.47	-1.28	-1.12	1.22	0.65	-0.04	-0.62	-0.82	-1	0.07	-1.22	-0.98	-1.39
KANK2	-1.06	-1.72	-0.87	-0.1	-1.48	-0.83	-1.13	-2.43	-0.99	-0.67	1.86	1.16	1.22	0.17	-1.99	-0.07	0.28	0.74	-0.69	0.69	0.36	-1.41	0.02	0.74	-0.06	0.13	0.13	-0.95	-0.01	-0.08	-0.77
KIFAP3	0.41	-1.05	0.13	-1.04	-1.48	0.19	-0.13	0.52	-0.58	0.55	0.01	0.05	-0.27	0.62	-0.63	0.03	0.2	0.83	0.79	0.88	0.44	0.37	-0.59	0.61	0.06	0.3	-0.29	-0.77	-0.54	-0.28	0.09
LIF	1.03	0.92	0.99	0.66	-1.48	2	2.78	2.59	2.4	0.54	0.67	0	-0.22	-1.13	0.15	0.42	1.59	0.49	0.8	-0.09	-0.55	-0.29	-0.22	-0.63	-0.69	-0.48	-0.29	0.66	-1.14	0.28	-0.74
MREG	-1.52	-0.76	-0.82	-0.75	-1.48	-0.08	-0.14	-0.26	0.43	-0.73	0.43	0.03	-0.41	-0.63	0.86	-0.12	-0.08	0.16	-0.99	-1.15	0.01	2.17	0.36	0.41	-0.68	0.58	-0.93	0.4	0.63	0.03	-1.69
NPY1R	-0.02	-2.08	-0.27	-0.53	-1.48	-0.84	-0.08	0.41	-0.15	-0.71	-0.38	-1.45	0.97	-0.93	-0.39	-0.84	-0.91	-1.09	-0.31	-0.19	-0.21	-0.63	-0.32	-0.68	-0.02	-0.77	-0.66	-0.67	-1.29	-0.96	-0.74
NRK	-0.17	-0.66	-0.36	-0.37	-1.48	0.35	-0.74	0.54	0.58	0.22	0.35	0.37	0.6	0.49	0.46	0.41	1.12	0.74	-0.21	-0.65	-0.7	-1.07	-0.36	1.16	-0.23	0.14	0.18	1.08	0.01	0.73	1.75
RNASE8	-0.49	-0.13	-0.47	-1.61	-1.48	1.25	0.64	1.58	1.93	0.37	-1.52	-1.41	0.17	-0.09	0.37	-0.18	1.27	2.45	0.16	-0.15	-0.38	-0.05	-0.54	-0.67	-0.32	0.28	-0.87	0.05	0.15	0.73	1.04
SCML2	0.46	0.26	-0.01	-0.46	-1.48	-2.3	-2.53	-1.98	-3.06	-1.35	1.56	0.41	0.25	0.34	-0.05	0.51	-0.07	0.74	0.08	-0.66	-0.69	-0.05	0.56	-0.43	0.75	-0.33	-0.49	-0.06	0.52	0.2	1.73
TAF12	-0.72	0.81	0.34	-1.27	-1.48	-1.48	0.16	-1.26	-0.3	-0.83	-1.37	-2.45	0.65	-1.11	1.14	0.72	1.83	0.08	0.24	0.95	1.89	0.7	-1.48	1.61	0.04	0.35	-0.19	-1	-0.89	-0.42	-0.79
TTC23	-1.4	-1.73	-1.22	-1.13	-1.48	0.1	0.5	0.75	0.62	-0.13	-2.4	-1.68	0.32	0.29	0.47	-0.67	-0.9	-0.52	-0.78	-0.7	-0.62	-1.49	0.84	-0.28	0.14	-0.41	0.52	0.24	0.43	-0.22	0.75
AGPAT5	-0.81	0.23	-1.39	-1.39	-1.47	-1.1	-0.72	-0.16	-0.18	-0.28	0.49	1.09	0.8	-1	0.57	-1.71	1.08	0.62	-0.01	0.34	-0.15	-1.56	-0.48	-0.54	-0.36	-0.3	-1.13	-0.07	-0.84	-0.8	-1.54
ARNT2	-1.76	-1.72	-1.68	-1.62	-1.47	-0.15	0.97	1.19	1.65	-0.29	-0.97	-0.37	1.61	0.51	-0.37	-0.38	0.59	1.23	0.06	0.28	0.23	0.96	-0.02	0.34	-0.14	1.06	1.52	-0.16	1.54	0.14	1.29
CCDC113	0.35	-0.57	-0.44	0.69	-1.47	-1.82	-0.19	-1.45	-0.77	-0.6	-0.27	-0.34	0.53	-0.92	0.2	1.4	0.29	0.71	-0.06	0.73	0.99	1.15	-1.09	-1.03	-0.34	0.52	-1.32	-0.18	-0.29	-1.19	0.73
DCAF15	-2.17	-0.29	-1.16	-2.44	-1.47	-0.43	-0.87	-0.64	0.7	0.15	-0.76	-0.14	-0.85	-0.65	-1.06	-0.14	0.13	-0.18	-0.09	-0.95	-0.54	-0.92	-2.02	-2.22	-0.88	-0.38	-0.15	-1.9	-0.77	-0.11	-0.08
DIO1	-1.02	-1.11	-1.08	-2.19	-1.47	-0.19	-0.82	1.12	-0.12	0.88	1.58	1.74	1.12	-0.44	0.98	-0.52	0.71	0.82	0.8	0.31	-0.5	-0.64	0.8	0.28	0.98	-0.17	0.8	0.49	-1.11	1.03	1.5
FAM126B	-0.92	-0.52	-0.74	-0.75	-1.47	-1.04	-1.97	-2.08	-1.54	-1.02	0.25	-1.11	0.06	0.66	0.33	0.61	-0.33	-0.37	-0.23	-0.59	-0.14	-0.45	0.57	-0.03	1.01	0.59	0.55	0.92	1.22	0.83	-0.76
FANCF	-11.86	-2.83	-2.3	-1.83	-1.47	-0.75	-0.63	-6.89	-1.86	-1.17	0.51	-0.73	-5.55	-18.14	-16.21	-0.99	-5.7	0.13	-0.43	-0.55	-1.64	0.49	-0.94	-2.09	-16.76	-1.42	1.64	-3.27	-0.45	0.04	0.29
GPS1	-1.66	0.26	0.32	-1.14	-1.47	2.23	-0.91	1.2	1.1	-0.81	0.42	-0.3	-0.69	0.45	-1.35	1.19	0.45	-0.43	-0.13	2.81	3.52	2.07	-0.31	3.56	0.98	-0.97	-1.59	-1.14	-2.3	-0.82	-2.92
HUS1B	-2.12	-1.15	-1.36	-1.85	-1.47	0.02	1.82	0.9	0.94	0.78	0.99	0.14	0.55	0.84	-0.13	0.9	-1.09	-0.99	-0.82	-0.42	0.03	1.47	-0.53	-0.18	1	0.08	0.44	0.23	0.99	0.05	1.04
JAG2	-0.56	-0.46	-0.58	-0.09	-1.47	0.7	-0.56	-0.05	0.75	-0.65	0.93	0.65	0.36	-0.16	-0.02	-0.19	0.6	0.39	-0.38	-0.58	-1.26	0.09	0.76	0.33	1.49	0.88	1.17	1.01	0.48	1.96	1.55
KIF18A	-1	-1.07	-1.61	-1.68	-1.47	-0.84	0.05	-0.46	-0.52	0.05	-0.82	-1.08	0.66	0.41	0.29	0.68	2.49	1.75	1.82	0.18	-0.68	1.47	1.67	2.18	-0.53	-3.7	1.6	0.41	1.25	-0.52	-1.22
MAP3K13	-0.3	-1.7	0.09	0.19	-1.47	-0.76	0.28	-0.08	-0.27	0.19	-0.18	-0.12	1.19	0.85	1.32	-0.38	0.73	0.92	-0.58	-0.24	-0.72	-0.5	1.63	0.23	0.58	0.19	0.87	0.65	-0.34	0.36	1.12
MCF2L2	-0.27	1.14	-0.37	-0.5	-1.47	0.68	1.27	0.95	0.75	0.37	0.88	0.79	-0.23	0.27	0.43	-0.16	-1.29	-0.68	-0.92	-0.31	-1.4	0.46	1	0.23	-0.35	0.66	-0.65	0.13	1.26	0.73	2.09
MRPS6	-1.97	0.18	-0.49	-0.82	-1.47	1.88	1.27	0.72	-0.57	-0.04	0.2	0.22	1.1	-0.27	0.22	0.47	0.66	-1.56	0.94	0.5	0.99	-1.88	-0.32	-0.08	1	1.27	0.36	0.85	-0.05	1.09	0.31
MYO1E	0.59	-0.49	-0.84	0.07	-1.47	-0.85	-1.17	-1.64	0.21	-0.83	-1.32	-1.1	-0.35	-1.37	-0.53	-0.51	-0.59	-0.91	-0.27	-0.25	0.18	0.59	-1.18	-0.49	-0.52	-0.56	-0.95	-0.69	0.09	-0.48	-1
NCS1	0.25	-1.79	0.21	0.8	-1.47	1.38	0.58	0.09	-0.51	-0.58	0.51	0.55	1.27	-0.77	-0.63	-0.02	-0.61	-1.22	-0.07	-0.81	-0.82	1.45	-0.05	-0.1	0.04	-0.26	-0.29	0.61	-0.21	0.96	1.21
PCDHGA3	-0.96	-1.47	-0.79	-1.33	-1.47	-0.79	0.06	0.14	0.2	0.01	-0.47	0.11	0.74	0.33	-0.64	-0.26	0.33	-1.99	-1	-0.67	-1.38	-0.02	0.01	0.11	-0.14	0.03	-0.21	0.13	-0.2	-0.7	-1.15
PLTP	-1.07	-0.46	-0.26	-1.03	-1.47	1.93	1.17	2.65	1.59	1.73	-0.2	-0.7	0.99	0.01	-0.44	0.27	0.59	-0.23	-0.37	0.31	0.38	-0.65	0.26	0.65	0.09	-0.09	0.37	-0.44	0.28	-0.03	-0.41
SCYL3	-1.8	-2.67	-2.03	-1.66	-1.47	-1.18	-1.59	-0.28	-1.31	-1.92	0.49	1.19	0.04	0.54	0.53	-2.48	-0.15	-0.04	1.41	1.14	0.43	-0.74	-0.68	-0.24	-0.15	-0.92	-0.95	0.56	-0.49	-0.22	-0.44
SLC22A3	0.01	-0.14	0.32	0.42	-1.47	1.21	1.34	0.95	0.96	1.66	-1.5	-0.79	0.22	0.51	0.04	-0.04	-0.08	-0.87	-0.76	-1.13	-0.61	0.07	0.33	-0.25	-0.99	-0.37	-0.77	0.69	0.01	0.21	0.31
SLC25A38	0.72	0.74	2.05	0.22	-1.47	-0.18	0.08	-1.18	0.06	0.23	1.27	-1.06	1.23	0.16	-0.04	-1.3	0.75	-0.22	0.1	1.03	0.82	-0.14	0.68	0	0.59	1.09	0.59	0.46	0.18	-0.16	1.45
TLDC2	-0.04	-0.36	-0.23	-1.05	-1.47	1.2	1.12	1.2	0.4	1.82	-1.86	-0.24	-0.91	-0.63	0.54	1.54	-0.58	-0.29	-0.3	-0.88	-0.01	-0.64	0.06	-0.47	0.17	-0.29	-0.66	1.41	-0.47	-0.45	-0.35
TMEM176A	-1	-1.4	-0.99	-1.09	-1.47	-0.36	0.33	0.29	-0.07	-1.43	0.79	1.79	0.64	-0.09	-0.29	-0.64	-0.41	-0.01	-0.18	-0.54	-0.57	-0.68	-0.24	-0.48	0.66	-0.54	0.31	-0.01	0.64	0.44	-0.36
AP1M2	0.23	-1.08	-0.12	-2.01	-1.46	0.7	0.59	-0.69	0.26	-0.14	1.22	0.16	0.47	0.15	-0.32	0.62	1.5	0.31	-0.47	-0.29	0.24	1.88	0.81	0.48	-0.07	0.73	1.45	-0.77	1.65	0.57	-0.15
ASXL3	-1.32	-1.14	-0.45	-0.52	-1.46	-0.18	-0.72	-0.52	-0.42	-0.68	-0.22	-0.62	0.24	-1.28	-0.32	-1.48	-1.25	-0.61	0.01	-0.05	-0.22	-0.33	-0.84	-0.29	-0.1	-0.23	-0.33	-0.05	0.64	-0.59	0.37
BBS2	-0.55	-1.23	0	-0.93	-1.46	0.3	-0.18	0.3	0.03	0.5	-0.44	-0.64	1.24	0.83	0.96	-1.01	0.65	1.22	0.46	-0.84	-1.18	1.25	-0.22	-0.31	-1.12	0.07	0.89	-0.11	-0.43	0.1	-0.33
C2CD2L	0.31	0.78	-0.16	0.37	-1.46	2.12	1.64	1.23	1.18	1.1	-0.04	-0.26	0.97	-0.26	-0.22	-1.4	-1.31	-0.82	-0.76	0.9	-0.11	-1.67	-1.21	0.33	-0.45	-0.37	-1.78	0.1	0.19	0.7	0.22
C8orf12	-1.68	-0.35	-0.21	-1.04	-1.46	-0.47	0.76	0.03	-0.29	0.91	-0.89	1.03	0.98	1.01	0.31	1.28	-1.3	-1.7	-1.15	-1.39	-0.9	2.52	0.76	-0.19	-0.58	-0.51	-0.52	-0.03	-1.08	0.97	-0.63
CCNL1	0.06	-1.44	0.22	-0.12	-1.46	0.46	-2.28	1.43	1.22	-1.03	1.3	0.3	0.13	0.01	0.72	-0.01	-1.15	-0.56	-1.16	-1.69	-1.09	-1.21	-1.57	0.3	1	-1.07	0.58	-1.8	-0.24	-1.45	-2.55
CDS2	-1.53	-0.26	-1.15	-1.06	-1.46	0.34	-0.78	0.62	0.26	-0.42	NA	0.68	0.06	0.88	-1.83	1.96	-0.46	-0.64	1.43	0.6	1.46	0.13	-0.16	-0.95	0.61	0.63	-0.86	0.9	0.01	-0.52	-0.5
COL5A1	-1.64	-0.92	-1.44	-1.17	-1.46	0.69	0.13	0.78	-0.5	0.2	0.85	0.71	0.03	0.06	0.83	-0.16	0.36	0.99	-0.89	0.1	-0.56	-0.03	0.57	-0.07	0.35	0.61	0.02	0.03	0.65	1.47	0.6
CTNNA1	-0.34	-1.43	-0.46	-0.55	-1.46	0.41	-0.9	-1.69	-0.98	-1.32	0.86	0.3	0.98	1.29	-0.71	1.2	0.65	0	1.41	1.7	1.09	-0.7	0.3	1.12	0.88	1.63	0.55	-1.51	0.79	1.32	1.06
DTWD2	-0.5	-0.64	-0.63	-1.47	-1.46	1.4	0.61	0.86	2.1	1.13	-0.04	0.31	0.41	0.28	-0.36	-0.26	0.07	0.04	0.06	0.49	0.43	-0.1	0.36	-0.04	0.13	0.38	0.49	-0.22	0.9	1.33	1.16
FUNDC1	-0.6	-0.07	-0.04	-1.55	-1.46	-0.39	0.2	0.21	0.06	-0.15	-0.62	0.51	-1.49	1.55	-0.44	-1.85	-0.65	-0.68	-0.68	-0.07	0.71	0.83	0.33	-0.16	0.72	0.54	0.3	-0.98	-0.19	-0.48	-0.29
LGR5	-1.44	1.14	-0.64	-2.18	-1.46	0.52	1.02	1.55	1.18	1.5	-0.29	-0.48	-0.09	-0.42	1.18	1.04	1.65	1.14	0.57	0.9	0.66	-1.56	0.35	0.65	0.02	0.24	0.71	0.22	-0.22	-0.09	1.15
MMS22L	-1.46	-0.78	-0.25	-1.14	-1.46	-0.36	-0.04	0.1	-0.29	-0.28	1.21	0.38	-0.07	-0.91	-1.49	-0.44	0.15	-0.02	1.82	1.25	1.93	0.81	-2.14	-2.8	-2.84	-1.98	-0.19	-2.85	-2.34	-1.02	-1.59
MRPL39	-1.34	-0.06	-0.74	-0.41	-1.46	-0.08	0.39	-0.74	-1.02	0.15	0.72	0.5	1.57	0.58	0.29	-0.6	0.33	-1.97	0.62	-0.03	-0.41	-0.18	-2.36	-0.3	-0.11	0.01	-1.62	1.23	0.63	1.29	0.51
NUSAP1	-0.3	-0.92	-1.36	-1.07	-1.46	-0.6	1.06	-0.48	0.43	0.62	-1.6	-0.64	0.52	-0.68	-1.1	-0.58	1.48	0.17	0.86	0.24	0.08	1.12	-0.31	-0.38	-0.74	-0.28	-0.98	0.37	-2.07	0.15	-0.67
PREX2	-0.31	-0.57	-0.05	-0.04	-1.46	0.5	-0.81	-0.36	-0.34	0.18	-0.48	-2.31	-1.35	-0.8	-0.78	0.12	0.4	-1.22	-0.53	-0.97	-0.27	0.03	-0.12	-0.75	-2.04	-0.65	-0.73	0.08	-1.6	-1.46	-1.48
RBM7	-0.77	-0.6	-0.58	-1.31	-1.46	0.48	-0.66	0.44	-1.09	-2	0.03	-0.05	-0.28	-0.92	-0.24	0.96	0	1.78	1.91	2.38	1.89	0.65	-0.86	-0.19	2.09	0.35	-0.11	0.38	-0.03	-0.08	-1.23
RSG1	-1.65	0.45	-0.99	-0.79	-1.46	-0.02	0.59	0.28	-0.05	-1.68	0.5	0.35	-0.05	1.22	0.88	0.15	-1.73	-0.73	0.11	1.12	0.95	-0.45	0.97	-1.07	0.98	0.5	-0.16	0.17	1.15	0.88	0.87
SRP54	-1.32	-0.57	-0.71	-0.67	-1.46	1.01	0.55	1.45	0.54	0.67	-0.63	0.9	0.12	-0.71	-2.13	0.1	1.21	1.59	-0.51	-0.31	-1.12	-0.4	0.17	0.55	-0.49	-0.54	0.39	1.87	0.2	-0.75	-0.92
ST8SIA1	-0.28	-0.75	-0.72	0.09	-1.46	-0.3	-0.91	-0.63	-0.6	-0.59	-0.34	-0.16	0.13	0.2	-0.76	0.99	-0.37	0.46	0.04	0.11	0.76	0.3	-0.21	-0.36	0.62	-0.26	-0.84	-0.75	-1.06	-0.88	-1.72
TAS2R31	1.31	-0.71	-0.02	0.95	-1.46	-0.09	-0.89	-0.8	-0.96	-0.7	-0.39	-0.24	0.2	-0.78	0.27	-0.8	0.2	0.28	-1.03	-0.13	0.04	-0.47	-0.25	-0.2	0.37	1.15	-1.55	-0.01	0.19	0.16	1.51
TBC1D10A	-1.12	-0.14	-0.53	-1.43	-1.46	-0.99	-0.64	-0.85	-1.47	1.06	1.06	0.02	0.34	0.36	-0.2	-0.35	-0.77	-0.03	0.55	0.08	0.08	1.48	1.49	0.82	0.15	0.96	0.39	-1.59	0.59	-0.09	-0.45
TK2	0.81	-0.34	1.35	0.66	-1.46	-1.2	0.41	-0.83	-0.21	-0.49	-0.79	0.19	0.62	1.03	-0.26	-0.73	0.43	0.33	0.18	0.39	0	-0.28	0.31	0.31	-0.49	0.12	0.4	0.01	-0.35	0.3	-0.67
TMEM123	-0.28	-0.58	-0.63	-1.52	-1.46	-0.6	0.25	0.26	0.24	-0.33	0.73	1.32	-0.35	0.78	-0.4	0.01	0.26	0.88	-0.27	0.22	-0.28	-0.34	0.43	0.62	0.24	-0.74	1.01	0.14	-0.35	-0.23	-0.54
TMEM181	0.95	0.28	-0.35	-0.17	-1.46	0.97	0.6	-0.17	1.37	0.23	-1.43	-0.41	1.11	0.76	0.02	1.45	-0.76	0.09	-0.39	0.35	0.72	-0.8	-0.75	0.16	1.42	-0.06	-0.08	0.56	2.02	0.1	1.44
USP24	-1.07	0.09	-1.22	-0.77	-1.46	-0.36	-1.05	-0.19	-0.64	-0.36	0.09	0.99	-1.86	0.07	-0.36	1.41	-0.56	0.34	-0.83	0.43	0.04	-1.15	-1.37	-0.61	1.02	0.11	0.18	-0.46	-0.13	-1.05	-0.94
ZNF229	-0.7	-0.65	-1.12	-1.63	-1.46	-0.61	-0.43	-0.39	-0.55	0.08	1.87	-0.65	-0.22	-0.47	0.6	0.16	0.11	1.08	-0.24	0.42	0	0.67	-0.33	0.19	-0.22	-0.44	0.42	-0.57	-0.7	-2.27	-0.75
ATG12	0.37	-0.4	-0.58	-0.64	-1.45	-2.31	-1.31	-1.45	-2.12	-1.03	-0.56	-0.53	-0.26	0.04	-1.03	0.82	0.12	-0.9	-0.6	-0.47	-0.05	-1.51	-1.17	-2.6	0.44	-1.44	-0.8	0.24	-0.09	-1.35	-1.9
C16orf54	0.31	0.48	1.12	0.67	-1.45	0.37	0.87	-0.44	0.73	0.52	0.43	-0.35	-0.58	-0.2	1.14	1.11	0.42	-0.17	-0.01	-0.54	0	0.99	0.11	0.1	-0.05	0.13	-0.19	1.3	-0.39	0.45	0.53
C1S	-0.66	-2.29	-1.12	-0.95	-1.45	-1.14	-0.96	-1.06	-1.76	-0.89	1.11	0.17	0.13	0.06	-1.25	-0.45	0.6	0.79	0.27	-0.03	-0.06	-0.52	0.37	-0.18	-0.41	-0.2	-0.05	-0.01	-0.09	0.13	-0.65
C20orf24	-1.34	-0.73	-1.02	-1.17	-1.45	-0.78	1.11	-0.97	0.35	0.24	-2.27	0.28	-0.98	1.04	0.43	0.69	1.39	1.34	0.53	0.13	2	1.08	-0.45	0.84	-0.17	0.62	0.76	-0.82	0.27	-0.35	-0.78
CAMKK2	0.19	-0.27	-0.66	-0.46	-1.45	-1.71	0.02	-1.23	-0.65	-1.59	0.76	0.65	-0.27	-0.44	-0.07	2.05	0.49	1.19	0.05	0.13	-0.52	0.26	1.09	0.29	0.19	0.73	1.44	1.23	1.7	0.59	1.42
DR1	-1.74	-1.01	-0.66	-1.67	-1.45	-0.56	-0.03	-1.37	-1.4	-0.71	-1.46	-0.67	2.53	-2.27	-2.23	-0.34	0.03	-1.49	3.85	2.76	1.72	-0.34	-2.33	-0.87	-1.96	-1.61	-3.01	-1.13	0.15	-0.25	0.43
EBLN1	-0.82	0.46	-0.74	-0.75	-1.45	0.83	0.54	0.55	0.84	0.57	-0.39	-0.63	1.05	-0.5	1.51	-0.8	0.66	0.26	0.18	-1.21	-0.81	0.7	1.08	1.38	0.92	0.33	0.68	0.52	-1.24	-0.71	-0.35
ENC1	-1.71	-0.74	-3.24	-2.23	-1.45	-0.77	-1.32	-0.68	-0.54	-0.05	1.16	1.37	0.71	0.54	0.44	-3.72	-2.72	-2.43	-1.75	1.2	0.04	-0.72	0.41	-0.7	0.26	-0.04	0.03	0.35	-0.65	0.07	-0.38
HOXC8	-1.56	-0.82	-1.79	-1.91	-1.45	-0.39	-0.67	-0.71	0.2	-1.1	0.41	0.08	-0.83	-0.96	0.12	-0.18	1.47	1.94	0.27	0.74	-0.22	0.74	-0.05	0.66	1.3	0.85	0.25	-0.53	0.31	-1.82	-1.14
KRTAP9-1	-1.15	-0.21	0.39	-0.5	-1.45	-0.48	-0.81	-0.04	-0.32	-0.4	-0.36	-0.58	-0.02	-0.49	-0.29	0.96	-0.21	-1.03	-0.38	-0.47	-0.5	0.94	1.16	0.37	0.03	0.26	1.37	-0.66	-1.93	0.39	0.83
MBOAT4	-0.26	0.47	-0.67	-1.85	-1.45	-0.87	1.75	0.12	0.31	-0.37	1.6	1.03	-0.62	-0.23	-0.43	0.99	0.86	1.42	0.06	-1.19	-1.05	0.86	1.13	0.17	-0.53	-1.19	0.09	0.2	-0.33	0.08	-0.22
NPM2	-0.16	-0.64	-0.68	0.48	-1.45	-0.8	0.78	-0.12	0.04	-0.27	1	0.45	0.96	-0.02	0.66	-1.56	0.31	-0.14	-0.75	-0.26	-0.46	0.51	0.29	0	0.37	-0.43	1.03	0.71	0.33	0.65	0.58
OAZ3	-0.74	-0.44	-0.88	-0.47	-1.45	1.22	0.04	-0.56	-0.01	-1.53	1.77	0.73	-0.93	-0.02	-0.91	-1.3	-0.84	-0.45	-0.01	-0.31	-0.01	0.04	0.16	-0.42	-0.39	0.02	-0.05	-0.01	-0.45	1.01	1.34
P2RX2	-2.73	-1.59	-1.42	-2.7	-1.45	-1.34	-0.22	-0.36	-0.18	0.42	-0.5	-0.24	-1.21	-0.75	0.17	-0.3	-0.09	0.38	0.57	0.7	0.4	1.04	-1.03	0	-0.22	-0.33	0.51	0.59	0.21	-0.53	0.71
PAPOLA	-2.99	-0.6	-1.73	-1.89	-1.45	0.22	0.4	1.12	-1.77	1.35	0.19	-0.82	0.57	0	-0.45	-0.29	0.18	0.19	0.61	0.51	1.19	-0.48	1.25	2.45	2.61	1.29	1.32	-1.76	2.43	1.79	2.3
RAX	-0.92	-0.51	-1.66	-0.7	-1.45	-0.39	0.88	1.07	0.94	0.12	-0.38	1.62	0.09	1.06	-1.54	-0.18	0.43	-0.19	0.49	-0.24	-0.19	-0.23	-0.27	0.25	-0.75	-0.3	-0.01	-0.53	-0.34	-0.69	-1.52
RDH13	-0.99	-1.22	0.32	-0.9	-1.45	-1.31	-1.69	-1.39	-0.92	-2.37	-0.45	0.8	0.5	0.32	0.32	0.54	0.83	1.82	-0.56	0.3	0.22	-2.19	0.35	0.73	0.7	1.83	0.81	-0.61	1.3	-0.51	-0.34
RLF	-0.35	0.17	0.24	-0.37	-1.45	1.58	0.66	0.2	0.57	0.5	-0.47	-0.17	-2.15	-0.43	-0.61	0.17	0.21	-1.01	0.64	0.39	-0.09	-0.23	-0.51	-0.47	-1.44	-0.46	-0.66	-0.46	-0.18	-3.59	-1.29
SMIM12	-1.28	-0.61	-1.02	-1.26	-1.45	0.01	-0.64	-1.13	-0.07	-1.6	0.46	0.2	0.17	0.03	0.3	-0.91	0.07	0.63	-0.3	-0.71	-0.79	-0.03	0.26	0.12	0.2	0.43	0.02	0.68	0.18	1.86	0.72
TAF7L	-0.25	0.12	-1	-1.64	-1.45	-1.04	-1.09	-0.47	-0.71	0.24	-0.45	0.02	-0.79	-0.76	1.11	-1.71	-0.99	-1.15	-0.33	0	-0.03	-1.17	0.74	0.46	-0.49	0.9	1.53	1.02	-1.06	-1.09	-0.3
TRIM42	0.23	-0.64	-0.08	-0.71	-1.45	-0.44	-0.54	-0.5	-0.93	-0.58	1.68	1.22	-1.95	0.31	0.24	0.99	-0.55	-0.32	-0.93	-0.37	-0.4	0.75	0.65	-0.11	0.35	1.12	-0.08	-0.14	0.78	0.34	0.5
TTC21A	-0.3	-2.6	-1.57	-1.12	-1.45	-0.22	-0.28	0.34	0.34	0.95	-0.2	-1.37	-1.08	-1.21	-1.05	-0.07	0.1	-0.38	-0.81	-0.37	-0.35	-0.32	0.19	0.25	-0.36	0.54	0.77	0.28	-0.31	1.02	-0.14
ZCCHC14	0.13	0.72	-1.28	-0.18	-1.45	-0.4	-0.55	0.46	0.03	-0.88	0.77	0.59	0.84	0.18	-0.81	-3.49	-0.46	0.34	-0.71	-0.7	-0.18	-0.67	-0.11	0.25	-0.05	-1.54	-3.23	-0.33	-0.37	0.84	-0.25
ANAPC16	-1.39	-1.1	-1.37	-0.4	-1.44	0.32	-0.37	0.52	0	0.42	0.2	-0.27	-1.09	0.9	0.84	-1.75	-0.19	0.55	-0.06	-1.16	-1.66	1.33	0.4	0.48	-0.53	-0.59	0.75	1.96	-0.01	1.25	-0.39
C1QBP	0.53	0.24	-0.12	0	-1.44	0.45	-0.34	0.18	-0.08	0.19	0.15	1.86	-0.37	1.03	-0.59	-1.3	-0.13	0.58	0.25	0.2	0.12	-0.64	0.72	-0.07	1.88	1.24	1.11	0.95	-0.26	0.04	0.51
C5orf51	-0.79	-0.97	0.64	0.35	-1.44	0.53	1.29	0.49	0.82	0.71	-1.05	-0.14	-0.61	0.51	0.61	1.38	-2.08	-1.08	-0.65	-0.84	-0.71	-0.49	0.58	0.72	-0.15	0.64	1.45	0.62	0.72	0.54	-0.9
CLCN4	0.17	0.03	-0.13	0.06	-1.44	-0.44	0.88	0.35	-0.11	0.09	-0.5	0.94	0.44	0.07	0.75	0.48	-0.51	0.01	-0.74	-0.36	-0.29	-0.35	0.06	-0.2	-0.26	-0.16	-0.59	0.69	0.27	0.77	-0.71
CMTM2	-0.18	-0.78	-1.37	-2.02	-1.44	-1.15	0.23	-0.34	-0.37	-0.29	1.21	1.39	-0.45	-0.88	0.3	0.42	-0.36	0.47	-0.24	-0.06	0.1	-2.3	0.38	0.32	-0.03	0.11	0.68	0.88	-0.34	0.49	0.78
CSF2RB	0.17	-0.06	0.71	0.54	-1.44	1.26	1.9	1.03	1.25	0.51	-1.55	-0.74	0.47	-0.03	-0.15	-0.44	1.36	1.72	0.03	0.8	0.81	1.52	0.22	-0.29	0.68	0.73	2.14	0.55	-0.39	-0.21	-1.44
FUT9	-0.91	-1.71	-0.57	-2.32	-1.44	-0.09	-0.4	-0.46	-1.08	-0.14	-0.61	-2	-1.32	0.8	1.54	0.24	0.53	0.18	0.72	-0.13	0.5	0.55	0.18	0.08	0.2	0.92	0.12	0.01	-0.09	-0.02	1.97
GOLGA1	-0.81	-0.47	-0.08	-0.74	-1.44	-0.16	-0.35	-0.02	0.26	-0.43	-0.5	0.48	-1.06	-0.47	0.83	1.71	-0.95	1.73	0.66	0.64	-0.61	-0.22	0.68	0.01	-0.41	-0.13	1.23	-0.15	-0.41	-0.7	-0.02
HERC1	0.21	0.01	-0.55	0.34	-1.44	2.18	1.08	1.12	2.27	1.38	-0.43	-0.26	-1.2	-0.34	-0.4	-0.92	-1.41	-0.84	0.26	-0.24	-0.3	-0.08	0.33	-0.11	-0.59	0.79	0.14	-1.12	-1.79	0.01	0.15
MYO1A	0.33	-0.21	-0.64	-0.81	-1.44	0.17	-0.89	0.49	-0.4	-0.27	-0.86	-1.15	-0.07	-0.03	-0.01	0.81	-1.48	-0.39	-0.3	-0.49	-1.43	-1.97	1.16	-0.27	-0.21	0.18	0.51	-0.39	-0.42	0.95	1.8
NDUFA9	-1.9	-0.55	-1.18	-0.72	-1.44	-0.16	-0.93	-0.6	-1.11	0.43	-0.33	-0.47	-0.76	-0.34	1.32	-0.15	-0.47	-1.51	-0.21	0.36	0.22	0.65	0.57	0.37	0.7	0.17	-0.19	0.77	0.24	0.86	-0.35
OVOL3	-1.44	-0.4	-0.55	-1	-1.44	1	0.42	0.52	0.53	1.36	0.82	0.85	0.82	1.96	0.38	1.55	1.8	0.22	-0.68	0.02	-0.3	-0.04	-0.11	1.07	-0.27	0.6	0.51	0.34	1.02	0.21	0.58
SDF2L1	0.7	0.26	0.16	-0.05	-1.44	0.32	-0.88	0.66	0.91	1.26	0.14	0.22	0.48	1.29	-0.06	-0.61	1.6	0.87	-0.47	-0.2	0.51	0.88	-0.36	0.33	1.11	1.34	-0.04	-0.19	1.75	-0.09	1.52
SIN3A	-2.08	-2.36	-2.08	-1.41	-1.44	-0.67	1.29	-0.4	-0.5	1.27	-0.99	-0.36	0.42	0.28	-0.38	-0.68	-0.91	1.34	0.49	0.07	0.13	-0.81	-0.34	0.58	-0.16	0.48	0.28	0.05	0.46	1.36	1.45
SLC25A10	-1.34	-1.08	-0.49	-0.52	-1.44	-0.01	1.62	-0.28	-0.12	0.28	-0.99	-0.54	-0.7	-1.29	-0.47	0.1	1.22	0.51	-0.58	0.67	0.36	-1.36	0.46	-1.3	-0.14	-0.29	0.02	-1.14	-1.96	-0.75	-1.75
SLC25A34	-1.83	-1.47	-1.76	-0.97	-1.44	1.11	1.33	0.96	1.45	0.39	0.24	1.74	1.47	0.21	0	-1.16	-0.56	0.39	0.36	0.06	0.44	0.36	-0.18	-0.58	1.29	1.27	-0.45	1.5	1.09	1.66	0.46
SNX29	-0.94	-0.01	-1.45	-0.66	-1.44	0.13	1.43	0.2	1.22	0.15	0.2	0.48	1.92	0.74	0.31	-0.14	-0.28	0.5	-0.23	0.07	0.47	0.63	0.85	-0.2	0.46	0.12	0.26	0.29	1.6	0.6	0.68
TMEM163	-0.76	0.05	-1.48	-1.39	-1.44	-0.72	1.33	0.26	-0.44	1.35	0.24	0.02	-0.26	1.19	0.34	-0.93	-0.88	-0.22	-0.05	-1.13	-1.07	0.45	1.37	-0.46	-0.31	-0.16	-0.73	0	-1.54	-0.16	-0.88
TRIB2	-0.53	-0.09	0.3	0.53	-1.44	1.94	1.82	1.69	0.82	0.38	-2.62	-2.86	0.59	-0.2	-0.18	-0.32	-0.04	-1.43	-0.22	0.09	0.73	-0.32	-0.58	0.3	0.9	0.17	0.5	0.76	-0.27	0	-1.43
UPB1	-0.47	-1.78	-0.81	-1.34	-1.44	-1.03	-0.43	-0.78	0.11	-0.76	-0.17	-0.43	1.08	-0.8	0.97	0.19	0.69	-0.32	-0.72	-1.77	-2.38	-1.12	0.11	-0.08	0.61	-0.51	0.75	0.31	-0.69	-0.49	0.2
ZFYVE26	-0.37	-0.92	0.19	-0.98	-1.44	-0.75	-0.32	0.85	-0.61	-1.04	-0.36	0.84	0.08	0.53	-0.24	0.1	-0.01	-0.33	0.06	-0.37	-0.01	1.67	0.03	0.84	-0.2	0.21	-1.22	0.4	1.11	-0.59	-0.43
ZIC4	-0.91	-1.69	-2	-1.02	-1.44	-0.39	0.4	0.33	0.37	-1.14	0.8	0.73	-0.49	0.43	0.28	-1.45	-1.8	-1.14	0.03	-0.45	-0.48	-1.38	-0.38	-0.25	0.05	-0.1	-0.49	0.3	-0.71	0.44	0.02
AKT1S1	0.02	-2.63	-0.81	-0.41	-1.43	0.03	-1.48	-0.96	-0.48	-0.84	-1.13	-0.69	1.43	-0.1	0.87	-1.52	0.17	0.32	-0.04	0.48	0.7	-0.73	-1.38	-0.25	0.33	1.49	-1.59	-1.07	0.96	0.53	0.73
C2orf80	-1.12	0.59	-1.04	-1.83	-1.43	-1.24	0.61	0.15	0.27	-0.54	-0.02	-1.22	-0.13	-0.38	0.09	-1.49	-0.23	0.61	0.52	-0.55	-0.85	0.85	0.26	-0.74	-1.08	-0.59	-0.24	-0.06	-1.36	-0.12	0.53
CARS	-1.68	-1.37	-2.15	-0.95	-1.43	0.09	1.19	-0.5	-0.25	-0.02	-1.4	0.63	-0.61	-0.09	-0.47	0.68	0.42	0.67	0.52	-0.53	-0.53	0.17	-0.86	-0.37	-1.65	-1.35	-0.69	-0.24	-0.66	-1.84	-0.7
CDC34	-0.04	0.48	-1.02	0.62	-1.43	0.6	-0.13	0.04	0.44	0.65	-0.77	-1.4	-0.06	0.18	-0.1	0.16	0.24	0.86	0.2	0.18	-0.08	-0.87	-0.74	-0.71	0.68	1.36	0.03	0.46	1.97	-0.32	-1.05
COL15A1	-0.86	0.13	-1.36	-1.82	-1.43	0.8	0.52	0.73	0.9	-0.36	-0.49	-1.05	-0.53	0.13	0.83	0.2	-0.08	-0.19	0.23	-0.42	-0.42	-1.54	-0.49	0.23	-0.43	0.47	-1.35	1.27	-0.31	-0.55	-0.45
CRIM1	-1.02	-1.72	-0.92	-2	-1.43	-0.54	0.1	-0.87	-1.34	0.25	0.24	-0.07	0.15	0.31	0.61	-0.49	0	-0.15	0.04	-0.27	-0.57	-1.59	-0.07	-1.05	-0.5	-0.24	0.98	0.29	-0.7	-0.92	-0.71
DUSP8	-1.4	-0.95	-1.04	-1.71	-1.43	1.51	0.67	0.22	1.06	-0.62	0	0.09	-0.59	1.21	1.17	-0.33	0.53	0.07	-0.19	-0.78	-0.32	0.12	-0.24	0.31	0	0.43	0.26	0.48	0.07	0.44	-0.47
DYNC1I1	-0.13	-0.88	-1.25	-0.85	-1.43	0.64	0.57	0.95	-0.11	0.79	0.99	-0.32	0.05	-0.33	0.41	0.01	-0.15	-0.16	0.71	0.08	-0.29	1.37	-0.93	-0.56	0.85	0.39	1.36	-0.25	-0.28	-0.09	-0.66
EVI5	-1.89	-1.71	-2.06	-2.71	-1.43	-0.33	-0.05	0.87	-0.37	0.19	1.34	1.09	0.31	0.04	-0.67	0.1	-0.65	0.59	0.16	0.4	0.4	0.21	0.52	0.44	0.02	-0.34	0	0.26	-0.8	-0.82	0.62
EZR	-0.91	-0.2	-0.77	-1.5	-1.43	-0.33	-0.1	-1.1	-0.55	-0.09	1.63	0.32	0.09	0.27	0.32	0.95	-0.95	-0.67	1.25	-0.25	-0.55	0.1	-0.39	1.48	0.5	1.64	0.47	0.01	-0.88	1.56	0.73
FOLR1	-1.81	-1	-0.36	-0.65	-1.43	0.68	0.71	1.31	0.08	1.49	0.36	-0.9	-0.51	-1.37	0.25	-0.04	-0.93	0.65	0.68	-0.41	0.08	1.23	-0.14	0.45	0.62	0.23	0.87	-0.19	-0.39	-1.07	-0.42
FOXF2	-0.41	0.46	-1.74	-0.38	-1.43	-2.41	-0.12	-0.76	-1.4	-0.81	-0.24	0.91	-0.06	0.59	0.82	-0.33	1.35	0.84	1.24	1.01	1.05	-1.75	-0.21	1.26	0.94	1.88	0.27	0.44	1.32	0.53	0.06
GABRB3	-0.39	-0.06	-0.51	-0.8	-1.43	-1.77	0.01	-0.62	-0.68	-0.29	-0.77	-1.39	-0.8	-0.47	-0.73	0.11	-0.42	-0.53	-0.13	0.95	-0.01	-0.35	0.46	-0.07	0.06	-0.31	-0.51	-0.74	-0.16	-1.01	-0.63
HIST1H1A	-1.11	-0.66	-0.47	-1.05	-1.43	-0.05	1.28	0.21	0.64	0.22	0.6	0.22	0.94	0.38	0.33	-0.21	0.65	0.45	-0.04	0.32	0.2	-0.4	-0.16	0.21	0.21	1.28	0.61	0.97	-0.73	-0.32	-0.41
HSPB2	1.29	-0.3	0.79	0.2	-1.43	0.86	0.52	0.49	-0.36	0.17	-0.68	-0.1	0.84	0.56	-0.55	0.66	0.23	0.07	-0.3	0.81	-0.67	-0.15	0.18	1.31	1.18	1.45	1.76	-0.94	-0.28	-0.05	0.15
KCTD14	-0.18	-0.77	0.54	0.68	-1.43	1.03	1.2	-0.54	-0.37	1.08	-0.29	-0.49	-0.77	0.19	-1	1.83	-0.82	0.06	-0.61	-0.19	0.35	-1.73	-0.75	-0.64	0.03	-0.83	-0.46	-0.26	0.9	0.79	1.5
L3MBTL3	1.27	0.03	1.7	1.66	-1.43	0.95	1.36	0.94	2.11	0.57	0.24	0.18	0.19	0.9	0.48	0.61	-0.19	-2.22	0.95	0.45	-0.43	0.35	-1.28	-1.78	-0.23	-1.68	0.33	-0.73	-1.69	0.34	0.09
LRRN4	0.09	-0.91	0.43	-0.35	-1.43	-1.19	0.67	0.53	0.35	0.33	0.27	1.03	-0.29	-0.42	-0.32	0.88	-0.13	0.56	-0.56	0.38	0.17	0.12	-0.26	-0.29	1.49	0.26	1.66	0.29	1.08	-0.92	-0.3
MAGEE1	-1.6	-1.08	-2.29	-1.79	-1.43	0.06	0.2	0.03	1.53	-0.12	-1.71	0.61	-2.11	-0.51	1.05	-0.14	-0.54	-1.35	-0.23	0.63	0.45	2.13	0.07	0.07	0.45	0.17	-0.8	-0.96	2.47	0.9	1.03
NGF	-0.95	0.05	0.17	-0.94	-1.43	0.02	1.18	0.64	1.11	1	0.41	0.95	-0.52	-0.28	0.79	0.11	0.28	0.12	0.19	0.33	0.54	1.45	0.34	-0.09	0.59	-0.2	0.47	-0.27	1.03	0.53	0.13
PEX11B	0.52	-0.74	1.28	0.19	-1.43	-1.01	-0.79	-0.52	-0.53	0.28	1.28	1.6	-0.6	-1.57	0.22	-0.49	0.55	-0.14	0.68	0.16	0.48	1.35	-0.7	0.81	0.44	1.25	0.63	0.59	1.04	0.43	0.48
PHEX	-0.17	-2.08	-0.46	-1.26	-1.43	-1.26	-2.05	-1.53	-1.96	-1.44	0.16	0.19	0.1	1.72	0.16	-0.51	-0.35	-0.47	-0.64	-1.51	-1.79	-0.16	0.13	-0.14	-0.51	-0.29	0.92	0.18	-0.47	-0.04	0.97
RFX5	0.04	0.13	0.01	-0.75	-1.43	0.59	-0.88	0.27	0.58	-0.87	-0.03	0.27	0.22	0.54	0.51	-1.62	-0.48	-0.47	0.3	0.08	-0.3	-0.06	0.97	0.22	0.81	-0.09	-0.01	0.24	-1.1	-1.34	-0.7
SNN	-0.79	-1.32	-1.11	-0.42	-1.43	0.38	0.65	0.21	0.3	-0.5	1.6	0.7	0.09	0.12	1.06	0.84	1.88	0.65	-0.64	0	0.94	-1.85	0.07	0.69	0.03	-0.93	0.14	1.22	-0.16	0.2	-0.52
TM4SF5	0.75	-0.35	0.5	-0.3	-1.43	-0.74	0.34	-0.15	0.29	-1.28	0.65	0.1	-0.39	-1.11	-0.11	-0.27	-0.21	-0.28	-1.08	0.24	0.65	0.21	-0.65	-0.47	-0.6	-0.04	-2.32	1.19	-0.11	-0.25	-0.51
TPSG1	-0.51	-0.43	0.25	0.13	-1.43	-0.6	-0.58	-0.53	0.47	-1.47	0.12	-0.34	0.22	0.84	0.69	1.27	1.1	-0.74	-1.29	-0.15	1.09	1.19	0.66	-0.18	0.92	0.38	0.27	-0.97	-0.05	-0.57	-1.68
WDR93	-0.45	-0.96	-1.9	-0.81	-1.43	-1.39	-1.57	-1.19	-1.19	-0.69	-0.59	-0.86	-0.21	-0.04	-0.21	-2.25	-1.32	-1.63	-1.02	-0.85	-0.83	-0.49	0.5	-0.22	-0.04	-0.89	0.48	0.78	-2.3	-1.1	-1.04
ZNF502	-0.07	-0.98	-0.99	-1.05	-1.43	-0.49	-0.39	0.36	-1.11	0.41	0.93	-0.33	0.82	-0.3	0.13	0.24	-2.2	0.32	0.24	-0.57	-0.01	-0.4	0.33	0.74	0.61	0.7	1.29	0.72	0.4	-0.3	-0.35
ZNF684	0.77	-1.03	0.11	-0.41	-1.43	-0.16	0.6	-0.04	-1.04	0.55	-1.85	-2.38	-0.37	1.47	0.83	0.23	0.4	0.65	0.64	0.58	0.14	0.09	-0.39	-0.09	0.33	0.56	-0.69	0.98	-0.41	-0.49	-1.59
ABCA9	-2.78	-1.16	-1.05	-2.28	-1.42	-0.24	-0.09	-1.39	-0.04	-0.19	0.17	0.26	-0.1	0.11	0.64	-0.18	0.15	-0.51	0	0.27	0.86	-1.23	0.28	-0.19	0.22	-0.17	-0.21	-0.72	-0.77	-0.17	0.02
AP5Z1	-1.34	-1.1	-0.54	-0.6	-1.42	-0.15	-0.23	1.04	0.92	0.47	-0.23	0.01	0.62	0.99	-0.41	-2.19	-0.46	-0.96	-0.88	0.27	0.18	-1.25	0.21	0.76	0.93	1.52	-0.19	0.5	0.83	-0.34	-0.25
BRD8	-0.71	-0.2	0.05	0.34	-1.42	0.3	-0.46	0.2	-0.01	0.33	-1.78	-1.61	1.91	-1.39	-1	-0.02	0.96	-1.07	1.6	1.06	1.35	0.04	-0.34	-1.23	-0.52	0.29	-0.18	-0.72	0.08	0.63	0.03
C14orf37	-0.1	-0.66	-0.1	-0.53	-1.42	0.48	0.52	1.28	-0.51	0.14	-0.33	-1.24	-0.67	0.69	-0.15	0.55	-0.36	-0.05	-0.07	-0.98	-1.14	0.31	-0.33	0.08	-1.4	0.01	-0.63	0.27	-2.68	-0.26	0.12
C5AR2	-0.23	0.63	-0.27	-0.16	-1.42	1.92	1.15	1.86	0.47	1.17	-0.54	0.49	0.17	0.5	-0.68	0.59	-0.39	0.38	-0.28	0.66	-0.54	-0.79	-1.04	0.39	-1.2	0.93	-1.42	-0.62	0	-0.02	-1.09
CD96	-0.48	-1.27	-0.88	0.06	-1.42	1.11	0.09	0.44	0.85	0.21	-0.47	-0.72	-0.65	0	0.54	-0.56	1.04	-0.27	-0.33	-0.04	-0.45	1.25	-0.82	-0.45	-0.35	-0.62	-0.03	0.39	1.51	1.4	2.11
CLASRP	0.88	-1.11	1.14	1.79	-1.42	0.06	-0.95	-2.02	0.61	-0.44	-1.91	-1.94	-2.8	-1.45	-1.66	-0.48	-1.47	-0.42	-1.16	1.25	-0.15	-0.22	-3.01	-1.61	-3.16	-2.78	-5.64	-2.36	0.55	-1.39	0.91
EGF	0.82	-0.17	-0.49	-0.83	-1.42	-0.36	-0.93	0.01	-1.03	-0.93	-0.98	-0.32	-0.69	-0.65	0.46	-1.1	-0.06	-0.79	-0.15	-0.59	-0.88	-1.03	0.76	0.95	0.06	0.29	0.5	0.16	0.01	0.57	1.39
GJC2	-2.05	1	-1.06	-0.85	-1.42	1.05	1.27	1.22	1.48	1	-0.33	-0.25	-0.66	-1.02	0.02	-0.05	0.18	0.63	-0.49	0.31	0.19	-0.41	0.48	0.2	1.45	0.21	0.85	0.79	-0.1	-1.23	-0.13
GPR171	0.38	-0.42	-0.8	-0.75	-1.42	0.9	0.16	0.75	0.13	0.56	0.41	0.82	-1.56	1.65	0.48	1.35	-0.29	0.51	0.57	-0.48	-0.08	0.83	0.1	0.05	0.62	0.6	0.15	0.22	0.53	-0.21	-0.42
GTF2A1	-0.3	-0.59	-0.43	-0.77	-1.42	-0.34	-0.29	0.62	0.09	0.34	0.73	0.08	-0.59	-0.64	0.23	0	1.8	0.57	0.9	0.13	0.38	-1.03	-0.44	-1.32	-0.88	0.12	0.2	0.3	-0.18	0.55	-0.1
LRRC8D	0.61	-0.31	1.31	0.36	-1.42	-0.69	-0.08	0.37	0.27	0.25	0.72	0.18	-0.69	1.13	0.25	0.86	1.25	1.21	0.94	0.06	-0.16	0.97	-0.35	0.35	-0.52	0.5	0.83	0.18	0.06	1.03	1.52
MYL9	-0.5	-2.05	0.08	-0.1	-1.42	-0.92	0.37	0.51	-0.65	-1.02	1.14	-0.39	-0.34	-0.87	-1.2	1.18	0.14	-0.25	-0.07	0.14	0.45	-1.45	-0.13	-0.34	-0.37	-0.92	-0.09	-1.53	-0.24	-1.57	-1.3
NDST1	0.22	0.6	-1.38	0.18	-1.42	-2.57	-0.68	-1.51	-0.61	-0.67	-2.42	-1.85	1.95	0.13	-2.19	-2.45	-1.46	-2.26	-1.86	-0.89	-0.56	0.18	1.18	-4.84	-0.08	-3.38	-1.59	-0.15	-2.98	-2.33	-2.06
NMU	-0.69	-0.8	0.05	-1.25	-1.42	-0.76	-0.13	0.11	0.17	-0.95	0.78	1.18	-0.44	-0.46	-0.49	-0.68	0.64	-0.63	-0.26	-0.59	-0.07	-0.82	-0.12	0.01	0.12	0.04	-0.64	-0.57	0.63	0.51	1.69
NTNG1	-0.34	-1.25	-1.12	-1.7	-1.42	-2.11	-1.89	-0.87	-1.39	-0.64	-1.49	0.32	-0.97	0.64	0.18	-1.97	1.01	0.91	-0.8	-0.32	0.1	-0.13	-0.16	-0.3	0.57	0.25	-0.41	-0.95	0.51	0.52	1.13
PLIN4	-1.07	-1.77	-0.76	-0.85	-1.42	1.22	-0.08	0.82	1.71	0.11	0.38	0.85	0.69	-1.14	-0.91	-0.5	-0.29	0.25	-0.73	-0.64	-1.43	-1.71	-1.14	0.05	-0.24	-0.6	0.57	0.77	-0.52	-1.22	-2.16
RPL35	-0.42	-0.41	-0.09	0.49	-1.42	0.47	0.7	-0.23	0.31	0.98	-1.26	1.8	2.35	-0.9	2.02	0.27	-0.38	-0.49	1.69	1.37	0.9	-1.73	1.2	0.7	0.33	-0.51	-0.02	-1.89	-0.37	-1.16	-0.32
RPS16	-0.65	-0.66	0.23	0.7	-1.42	1.14	1.31	0.44	0.38	0.5	-0.54	0.14	0.06	0.55	-0.23	-0.27	0.55	0.22	2.75	2.45	3.01	-0.14	1.17	0.74	0.17	0.85	0.33	0.03	-0.49	0.58	0.22
SIGLEC8	1.61	-1.78	-0.26	-0.29	-1.42	2.34	1.8	2.06	1.34	1.49	-1.42	-0.17	1.11	0.65	-0.6	0.81	-0.13	-0.15	-0.53	-0.45	-0.49	0.67	0.69	0.03	-0.22	0.58	-0.49	-1.62	0.55	0.72	0.59
SLCO2A1	-0.62	-0.65	-1.25	-1.09	-1.42	-0.76	-0.07	0.33	-0.29	0.85	-2.19	0.04	-2.45	-1.71	0.25	2.3	0.68	0.66	0.39	0.3	-0.16	-0.48	0.33	-0.08	0.29	-0.93	0.5	0.76	-0.63	-1.24	-1.56
SLX4	-3.01	-1.72	-0.54	-0.27	-1.42	-2.03	0.32	-4.24	-1.49	-1.52	2.05	1.57	-0.09	-7.33	-6.91	-0.27	-0.71	0.93	0.81	-0.37	-0.52	-0.48	-1.51	-0.32	-6.18	-2.18	-1.38	-2.97	-0.64	-0.71	0.33
TMPRSS13	-3.48	-0.25	-2.51	-1.89	-1.42	0.53	1.55	0.68	0.16	0.44	-0.04	-1	-0.65	1.01	0.87	-2.91	0.55	1.69	0.42	0.64	0.76	0.31	0.05	0.07	1.29	1.25	0.42	-0.88	0.98	0.12	-0.29
VAMP1	-0.18	0.84	-0.91	-0.21	-1.42	-0.4	0.06	-0.68	-1.09	-0.58	1.44	0.5	1.37	-0.37	1.17	-1.36	-1.46	-0.83	-0.4	-0.37	-0.11	0.25	0.35	0.21	0.36	0.34	-0.29	-0.84	0.21	-1.12	-0.02
ZNF384	0.67	-1.3	0.8	0.08	-1.42	0.25	0.63	1.28	-0.05	0.14	2.09	2.02	1.95	-0.11	-1.4	-0.31	-0.98	-2.86	-0.52	-0.05	-0.43	0.69	-1.17	1.73	0.75	-1.48	0.11	-0.49	0.93	0.77	0.65
CCDC61	-0.97	-0.93	-0.03	-0.82	-1.41	1.19	1.88	2.28	0.87	1.57	-0.64	0.84	0.55	-0.53	-0.57	-0.27	1.35	1.38	-0.73	-0.52	-0.61	-0.89	0.28	1.01	0.21	1.04	2.32	0.92	0.52	0.17	0.3
CDKN2B	-0.4	0.47	-0.83	0.03	-1.41	-0.2	-0.88	0.33	-1	0.76	-1.84	1.24	0.26	-0.19	1.84	-1.12	0.24	0.81	-1.1	-0.19	0.27	0.14	-2.23	-2.33	0.19	-0.67	-0.82	-0.17	-0.17	-1.41	0.83
CST9L	-0.03	-1.18	-0.34	0.36	-1.41	-0.87	-1.14	-0.84	-0.78	-1	0.28	-0.02	0.72	0.07	0.41	0.6	0.84	-0.85	0.04	-0.32	-0.52	-0.35	0.29	-0.18	-0.33	-0.29	-1.05	-0.52	0.63	1.08	-0.73
CYHR1	0.07	1.74	-0.76	0.41	-1.41	-0.17	-0.91	-0.95	-0.62	-1.38	0.8	0.22	0.75	0.13	0.68	1.51	-0.11	-0.14	-0.79	-0.24	-0.57	0.59	0.46	0.42	0.57	0.17	0.04	1.2	1.06	1.22	-0.08
EGR4	-0.13	-1.55	-1.85	-0.24	-1.41	-0.52	-0.07	0.58	-0.9	0.13	-0.86	-0.31	0.41	0.73	1.27	-1.01	-0.9	0.34	0.56	0.87	0.83	0.53	-0.01	-1.03	1.53	-0.99	0.55	-0.86	0.56	1.77	0.47
FOLR2	0.83	-1.49	0.51	1.57	-1.41	-1.25	-0.85	-0.17	-0.21	-1.73	-0.92	-0.52	-0.93	-0.18	0.8	0.31	-1.76	0.52	0.13	0.2	0.51	-1.7	0.8	0.85	0.16	0.07	-0.06	-0.15	0.1	-0.21	0.43
FOXK1	-0.7	0.12	-1.65	-2.7	-1.41	-2.59	0.09	-2.38	-0.5	-0.61	0.9	0.68	-1.21	-0.8	-0.03	-0.57	-1.68	1.37	-0.78	0.12	-0.24	2.52	-0.1	0.42	-0.93	0.18	0.28	0.14	-0.02	0.07	-0.44
HLA-DPB1	-0.55	1.65	0.04	-0.06	-1.41	0.2	2.27	1.8	0.47	-0.08	0.25	1.24	-1.26	-0.42	-0.48	-1.37	-1.4	-1.3	-1.38	0.42	-0.6	-0.45	0.29	0.98	0.15	1.79	1.23	-0.86	0.94	1.23	1.58
MED15	-0.75	-0.43	-0.19	-0.1	-1.41	1.93	0.28	0.36	-0.92	-1.49	-0.29	0.55	-0.75	-0.08	-1.4	0.82	1.23	-0.81	1.89	0.84	0.58	-1.03	-0.84	-0.59	0.75	-1.36	1.33	-1.24	-0.01	-0.9	-2.08
MED17	-1.41	-1.17	-1.21	-0.78	-1.41	-1.85	-1.3	-1.74	-1.13	-2.19	0.68	0.35	-1.5	-0.77	0	0.28	0.18	-0.95	0.47	-0.62	-0.29	-1.63	-0.21	-0.19	-0.09	0.92	0	-0.47	0.53	-1.51	0.51
MGAT4C	-0.21	-0.93	-1.21	0.49	-1.41	-0.16	-0.27	-0.12	0.21	0.4	-1	-1.22	-0.09	1.01	0.92	-1.63	1.23	2.16	0.99	0.82	1.07	-0.97	-0.77	-0.41	-0.24	-0.86	-0.96	-0.14	0.11	-0.94	-0.76
OLA1	0.19	-0.26	0.85	0.07	-1.41	-1.01	-2.59	-3.18	-2.28	-1.9	0.3	-1.13	1.23	-0.83	-0.14	-0.63	1.24	0.76	1.57	0.87	0.69	-1.1	-2.55	-2.48	-1.55	-1.64	-2.06	-0.51	-0.81	0.19	-0.96
OR1B1	-1.68	-0.88	-1.62	-1.1	-1.41	0.7	0.89	1.35	0.95	-0.23	0.98	1.08	-1.12	-0.05	0.78	0.31	0.7	0.53	0.25	-0.28	0.26	1.17	0.7	1.33	1.6	0.39	0.31	-0.73	-0.65	0.41	0.23
OR5M3	0.97	-1.52	-0.07	-0.31	-1.41	1.03	0.87	1.18	1.75	0.72	2.23	2.24	-0.87	0.88	-0.4	-0.6	1.58	0.57	-0.25	-1.49	-1.34	-1.98	-1.15	-0.81	-0.31	-0.03	0.43	-0.28	1.78	2.39	1.32
PRDX3	-0.67	0.62	-0.84	-1.17	-1.41	-0.55	-1.14	1.25	-2.24	0.4	0.33	-0.7	-0.96	0.35	0.96	-0.04	0.15	0.41	0.42	-0.14	0.26	-1.82	-0.03	-0.03	0.12	-1.83	-0.36	0.44	-1.26	-0.35	-1.59
PROK1	1.5	1.08	0.4	1.57	-1.41	1.75	2.11	1.78	1.66	1.99	0.53	1.04	0.32	-0.01	0.18	-1.13	-3	-2.81	-2.18	0.32	-0.32	-0.2	-1.23	-0.69	-0.2	-0.73	-1.49	-0.88	0.04	1.17	-0.19
RBL2	-1.67	-1.55	-1.03	-1.62	-1.41	-0.72	-1.46	0.19	-0.29	0.15	-0.06	0.82	-0.35	0.25	0.58	-0.22	-1.56	0.12	-0.85	-1.15	-0.23	0.65	1.3	-0.91	0.07	0.56	0.3	1.67	-0.81	-0.04	-0.16
SKAP1	-1.55	-0.08	-0.26	-2.3	-1.41	0.21	0.53	-0.35	1.06	-0.03	0.26	-0.19	0.91	0.06	0.4	2.28	0.41	0.6	0.33	0.02	0.54	2.19	0.74	0.37	0.83	0.46	-0.31	-0.19	-0.26	0.32	-1.48
SLC39A1	-1.23	-0.74	-1.29	0.22	-1.41	0.61	0.94	0.5	0.66	-0.7	0.07	0.78	0.25	-0.05	0.13	1.75	-0.6	-1.42	0.23	0.47	-0.8	0.52	1.83	-1.64	0.48	-0.49	-0.21	0.67	0.69	-1.16	-0.02
TBL1Y	-0.59	-2.34	-0.29	-0.93	-1.41	0.14	-1.75	-0.85	-1.26	-0.09	-0.2	0.7	0.48	-0.47	0.87	-2.27	0.34	-0.03	-0.4	-0.53	-0.29	0.91	-0.1	1.11	0.51	0.85	0.44	-1.14	-1.09	-1.91	-0.08
TECTA	-0.75	-0.01	-0.77	-1.16	-1.41	0.04	-0.79	0.61	0.32	0.61	-0.05	-0.13	0.34	0.85	0.24	0.2	0.06	0.32	0.33	-1.33	-1.3	0.11	-1.23	-0.19	-1.2	-0.03	-0.15	1.93	-0.41	-0.29	1.56
TMEM45B	-0.09	-0.34	-1.51	0.29	-1.41	0.75	0.9	-0.2	0.31	-0.07	0.31	-1.27	0.23	0.21	-0.14	-0.05	-0.34	-1.49	0.22	-1.1	-0.88	0.44	-0.53	-0.29	-0.08	0.19	-0.12	0.39	-2.49	-0.5	-0.76
WDR70	-1.58	0.91	-1.43	-0.62	-1.41	0.81	1.37	0.3	0.03	0.17	-0.37	-0.6	0.62	-0.72	0.39	0.24	-0.27	0.86	-1.26	0.01	-0.57	-0.11	-0.8	-0.11	0.12	0.23	-0.22	1.11	-0.63	-1.51	-2.41
YTHDF2	-0.62	-1.44	1.37	-1.31	-1.41	1.36	0.14	-2.91	-0.99	-1.65	1.08	0.07	1.26	-0.27	-0.52	0.65	-1.3	-1.5	-0.79	-0.38	-0.66	0.05	-1.15	-0.11	-2.52	0.98	0.59	-0.89	-0.3	-0.19	0.42
CBR4	-0.69	-0.42	-0.77	-2.08	-1.4	-0.57	-0.3	0.4	0.23	0.36	0.25	0.17	1.38	-0.34	-0.24	-1.3	-1.95	-1.14	-1.3	0.21	1.1	-0.87	0.34	0.15	0.79	1.15	0.6	-0.54	-0.61	-1.37	-0.43
CD200R1L	-2.13	-0.85	-1.02	-1.17	-1.4	0.13	0.56	-0.18	0.53	0.25	-1.2	-1.4	-0.01	-0.45	-0.74	0.16	0.29	-0.36	-0.53	-0.29	0.02	0.27	0.5	0.26	0.55	0.52	-0.29	1.43	-0.14	-1.03	-1.2
CHD1L	-0.5	-0.61	0.07	-0.13	-1.4	1.46	0.8	-0.13	0.66	1.95	1.29	-1.29	-1.28	-0.38	0.71	-0.87	-1.06	-1.18	-0.79	-0.63	-0.14	-0.19	-1.8	-0.92	-0.58	-2.16	0.26	3.15	-0.79	-1.21	-1.32
DNASE1L2	0.96	1.09	0.78	1.48	-1.4	0.04	0.05	-1.31	0.43	-1.4	-0.88	0.56	1.46	0.39	0.19	-0.82	0.16	-0.23	-0.4	-1.47	-1.54	-1.58	0.53	0.38	-0.33	0.58	0.65	0.38	-0.37	-0.23	-0.06
FAM196A	-1.27	-0.71	-1.7	-0.47	-1.4	-0.33	-0.02	0.51	-0.32	-0.24	0.87	-0.44	0.31	0.48	0.41	0.13	0.29	0.5	-0.23	-0.57	-1.14	-0.65	0.18	2.36	0.69	0.96	1.61	0.44	-1.55	0.11	-1.38
GNA13	0.58	-0.43	1.27	0.27	-1.4	-0.7	0.48	-0.11	-3.58	-1.96	0.76	1.03	-0.7	-0.73	0.46	1.74	-1.08	-1.03	-0.74	-2.14	-2.75	-0.7	-4.59	0.95	-1.23	-0.3	-0.55	-1	-0.08	-0.66	-0.77
IMPDH1	-0.41	-0.21	0.11	-0.89	-1.4	0.36	-0.42	0.49	-0.61	0.52	-0.54	-0.32	0.57	0.03	0.14	1.41	-0.25	-1.16	0.8	-0.82	-0.88	1.54	0.21	-0.25	-1.29	0.23	0.59	0.34	-0.36	0.67	-1.18
KRT33A	-0.99	-0.47	-1.3	-1.39	-1.4	0.09	0.02	0.4	0.44	-0.25	0.04	0.04	-1.83	0.51	-0.5	-1.79	-0.61	0.29	-1.12	-0.9	-1.47	1.08	1.35	0.07	0.12	-0.05	0.42	0.03	0.57	0.18	-0.03
METTL3	-1.29	-0.53	0.3	-1.25	-1.4	2.4	0.41	-2.07	0.08	-2.72	-0.3	-0.52	-0.29	-1.32	-1.62	0.7	-0.21	0.82	1.8	3.1	2.51	0.26	-0.91	0.25	-1.39	-0.03	-1.18	0.56	-1.27	-0.36	0.3
MTR	-0.76	-1.36	-1.2	-1.21	-1.4	0.59	-0.33	0.51	-0.7	-0.31	-0.5	-1.59	0.05	0.79	-0.21	-0.63	0.56	0.2	-0.57	-0.93	-0.71	0.77	0.3	-0.56	0.26	0.35	0.06	-0.03	-1.48	-0.56	0.4
NUDT5	0.73	0.09	0.2	0.28	-1.4	-1.11	-0.32	-0.41	-0.06	0.02	0.86	-1.4	0.71	0.33	0	-0.18	-1.65	-0.53	-1.39	-0.21	-1.33	0.46	0.28	0.93	1	-0.04	0.06	-0.49	-0.37	-0.04	0.11
NXF1	1.23	0.84	2.02	0.35	-1.4	1.13	0.11	1.5	1.37	-0.25	-1.23	1.1	1.2	0.38	1.23	0.79	0.79	-1.32	-0.79	-0.22	-2	-0.33	0.2	0.44	0.92	1.08	0.57	-0.94	-0.23	-0.49	-2.18
OR10Q1	-1.74	1.66	-0.58	-2.03	-1.4	-1.89	-1.37	-2.15	-1.9	-2.4	0.35	1.83	1.08	0.19	0.9	-0.71	-0.28	-0.98	-0.83	-0.3	-0.06	-0.59	-0.56	0.42	-0.33	0.33	-0.03	-0.27	-0.56	0.86	0.29
PCDHB6	0.24	-0.68	-0.66	0.46	-1.4	0.16	-1.61	-1	-0.93	-0.39	-0.3	-0.94	0.11	-0.17	-1.21	0.16	-1.11	-0.59	-0.38	-0.32	-0.27	-1.12	0.22	-0.32	1.12	0.85	0.4	-1.2	-0.44	-0.19	0.43
SF3B1	-0.48	-0.61	-1.25	-0.26	-1.4	0.24	-0.54	-1.1	0.05	-0.49	-2.26	-0.85	-1.8	-0.66	-0.31	0.46	0.46	-1.13	-0.89	-0.87	-0.24	0.53	-0.87	-0.87	-2.01	-1.89	-2.43	-0.05	-0.84	-0.01	-1
SLCO2B1	-0.73	-0.36	-0.98	-1.17	-1.4	0.39	0.39	0.16	-0.54	0.81	0.51	0.75	-0.01	-0.45	-0.24	-0.17	0.2	-0.09	0.34	0.44	-0.08	1.01	0.44	0.81	0.46	-0.17	0.3	0.21	-1.22	-0.64	-0.07
VBP1	-0.47	-0.39	-0.53	-1.17	-1.4	0.69	0.82	1.88	1.25	-0.02	-0.82	-0.89	0.58	-0.55	-0.13	1.61	-1.05	1.67	1.21	0.44	0.56	0.35	0.62	-0.09	1.35	-0.34	1.03	0.73	-0.06	0.05	-0.12
ZFP64	-0.32	0.87	-0.59	-0.31	-1.4	1.64	2.86	1.41	0.61	1.76	-0.11	1.34	0.12	0.11	-0.65	0.94	0.69	0.38	0.28	-0.36	0.66	0.34	-0.38	0.89	0.17	1.26	-0.22	0.23	0.29	0.46	1.19
ZNF540	0.87	0.41	-0.32	0.07	-1.4	2.03	0.97	0.42	1.46	0.39	0.76	1.81	-1.11	0.02	-0.51	2.54	-0.78	-0.85	-0.36	-0.98	-1.55	-0.3	0.47	0.81	-0.5	0.45	-0.37	0.9	-0.6	-0.82	-0.83
ZNF555	-1.34	-1.1	-0.75	-1.89	-1.4	-1.15	-0.16	-0.08	-0.51	-0.9	-0.29	-1.58	0.93	-0.4	0.17	0.24	-1.37	-0.45	-0.31	-0.42	-0.27	0.84	1.13	-0.05	0.25	0.76	0.65	-0.54	-0.18	-0.06	-0.1
ATP6V0A4	-0.77	-0.35	-0.03	-0.5	-1.39	0.12	-0.23	0.54	0.27	0.43	0.03	0.73	0.95	-0.06	-0.48	-0.48	-1.39	-0.14	-0.6	0.11	0.39	0.35	-0.87	-0.64	0.03	0.25	1.22	-1.1	0.22	0.4	0.72
B3GALT2	0.23	-0.43	1.16	-0.75	-1.39	1.35	1.2	1	1.27	0.59	-1.12	-1.27	0.67	0.22	0.56	1.23	0.59	0.31	0.08	0.33	-0.07	0.32	0.71	-0.54	1.14	0.63	0.17	-0.63	-0.21	-0.37	-0.19
BSDC1	0.33	-0.32	0.28	-0.1	-1.39	0.76	0.47	1.05	1.59	0.35	0.86	1.05	0.68	0.52	-0.08	0.53	0.98	1.58	0.06	0.66	0.03	1.44	-0.33	0.35	0.43	0.03	-0.49	-0.75	-1.23	-1.98	-2.72
C1orf43	0.18	-0.11	0.5	-0.09	-1.39	0.31	0.27	0.34	0.56	0.46	0.04	1.57	1.18	0.78	-0.33	-0.2	0.05	0.84	-0.3	0.2	1.52	0.42	0.49	0.58	-0.17	-0.39	-0.1	-0.93	0.96	1.36	-0.86
EGLN3	-0.37	-0.2	-0.94	-0.06	-1.39	0.29	0.76	0.77	0.63	0.94	0.18	-0.65	0.18	0.66	-0.25	1.56	-2.14	-0.38	0.3	0.04	-0.32	-0.25	-0.2	-0.2	0.1	0.38	-0.3	0.39	0.72	-0.13	0.46
FAM183B	0.52	-0.25	-0.47	0.49	-1.39	-0.21	-0.36	-0.49	-0.06	0.19	-1.23	0.71	-0.86	0.76	0.52	-0.46	0.57	-0.03	-0.2	-0.06	-0.09	0.93	1.28	1.14	1.3	0.63	-1.01	0.89	0.74	0.74	1.42
FAM96A	0.64	-0.64	0.45	0.74	-1.39	0.25	1.35	-0.25	1.09	-0.18	-0.13	-2.19	1.52	-0.33	-0.67	-2.16	-1.51	0.04	-0.16	-0.61	0.32	0.07	-0.26	0.12	-1.36	-0.72	-0.02	-0.82	0.58	0.48	0.67
HSF2	-0.43	0.27	-1	-0.7	-1.39	-0.02	-2.01	-0.15	-0.5	-0.17	0.59	0.23	-0.65	-0.81	0.51	0.44	-0.76	0.45	-0.61	-0.3	-0.71	-0.77	0.41	-1.02	-0.64	-0.59	-0.12	0.57	-1.3	-0.63	-1.93
LMO4	-0.17	-0.66	0.21	-1.52	-1.39	-0.37	0.13	-1.26	-0.28	-0.36	1.84	0.43	0.76	1.05	0.1	-0.03	0.35	-0.12	-0.14	-0.89	-1.44	0.98	1.02	0.26	-0.34	0.43	1.5	0.48	-0.69	-0.51	-0.39
NUP88	-1.95	-1.28	-1.37	-1.36	-1.39	-0.55	0.61	-0.63	-1.04	0.59	1.1	-1.12	-0.32	-0.38	0.24	-0.27	0.49	0.57	1.22	0.63	1.71	0.01	0.06	-1.07	-0.54	-1.13	-0.01	0.28	-0.05	-0.09	0.86
PACSIN1	-1.06	-0.21	-0.35	-0.6	-1.39	1.06	0.09	0.21	0.64	2.36	0.48	0.97	1.06	-0.33	0.17	1.38	0.57	-0.46	0.35	-0.45	-1.47	1.64	0.44	-0.05	-0.36	0.87	0.35	0.15	1.34	1.38	1.62
PDXDC1	-1.23	-1.47	-1.22	-0.83	-1.39	-0.46	-0.23	0.44	-0.53	-0.22	0.4	-0.15	0.13	0.8	0.14	0.69	1.22	-0.24	-0.71	-0.36	-0.44	-1.23	0.43	1.61	-0.43	0.62	2.16	1.09	0.68	0.07	0.72
PHKB	-0.66	-0.17	-0.85	-1.69	-1.39	0.55	0.97	0.09	1	0.2	-0.56	0.14	-0.25	-0.19	0.6	1.02	-0.25	-0.17	-0.74	-0.23	-0.4	0.53	-0.32	0.21	0.06	0.67	0.01	0.37	-0.39	1.69	0.01
PVRIG	-1.19	-0.46	-1.76	-0.89	-1.39	1.1	0.78	0.28	-0.62	0.57	-1.94	-2.28	0.77	1.08	0	0.54	0.32	0.04	0.55	0.91	0.07	1.23	0.37	-0.4	-0.47	-0.54	0.02	-0.47	0.96	1.32	0.09
RPF1	0.02	-0.76	0.12	0.03	-1.39	-0.13	0.76	0.68	-0.23	0.31	0.22	1.01	1.09	0.62	-0.31	0.9	-0.97	-1.33	1.79	1.65	2.2	2.07	-0.38	-0.32	-0.47	-0.67	0.72	-0.23	-0.72	-1.42	-0.54
RPRD1B	-0.75	NA	1.26	1.22	-1.39	0.58	1.54	-1.81	-0.11	0.42	-0.52	-0.62	2.62	-1.08	-2.33	-1.22	0.11	2.13	-0.43	-0.77	-1.21	-0.43	-1.39	8.32	-4.36	0.82	-2.85	-5.75	-2.16	-1.91	-3.27
SP140	-0.26	0.41	-0.46	0.41	-1.39	0.18	-1.18	-2.02	0.8	0.1	0.3	-1.05	0.4	-0.05	-0.38	-0.66	0.01	-0.37	-1.45	-1.06	0	0.77	-0.81	-0.73	-0.11	-0.77	-0.46	-0.14	0.65	0.26	1.07
SP8	-0.77	0.57	1.73	-0.83	-1.39	1.71	0.19	1.7	1.63	-0.28	-0.35	0.57	1.31	0.07	0.42	-0.34	0.77	0.18	0.87	0.28	0.52	2.04	0.35	0.78	0.42	0.35	1.3	0.1	0.13	-2	-2.55
SRC	-1.43	-2.35	-0.68	-1.94	-1.39	0.56	-0.3	-0.36	0.56	-0.05	0.13	-0.58	0.5	0.34	-0.96	1.7	-0.16	0.25	0.81	-0.82	-1.04	-0.09	-1.36	0.76	-2	-1.04	-0.23	0.15	-0.21	0.28	-0.68
TBPL2	-1.16	-1.31	-0.61	-1.41	-1.39	-0.41	-0.33	-0.49	-0.28	-0.69	-0.76	-1.05	0.86	-0.99	0.92	-1.51	-1.27	-0.62	-0.43	-0.39	-0.4	1.04	0.28	-0.13	-0.61	0.49	-0.26	0.92	-0.35	-2.02	-0.37
TCL1B	-0.14	0.37	0.65	0.73	-1.39	0.63	-0.19	0.45	0.1	0.79	1.01	1.76	-0.77	-0.08	0.01	0.03	-0.35	0.29	0.22	-0.41	0.51	0.35	-0.67	-0.13	-0.88	-0.24	-0.43	0.86	-1.4	-1.16	-1.32
TRIM37	-1.98	-1.31	-1.32	-1.28	-1.39	0.56	-1.15	-1.83	0.16	-2.19	-0.91	-0.28	0.9	-2.63	-2.57	-0.72	1.46	0.06	-0.87	0.88	-0.66	-2.31	-2.66	-2.88	-2.64	0.23	-5.37	-1.49	-0.6	-0.25	2.5
UNC50	0.27	0.49	0.72	0.44	-1.39	-0.45	0.25	-0.98	-1.32	-1.03	2.08	2.25	1.27	-1.39	-0.47	0.11	-1.02	1.46	1.47	-0.57	-0.23	1.28	-0.48	-2.71	-1.43	-0.58	-0.97	-0.59	-0.25	0.64	-0.24
ARHGAP29	-1.76	-0.47	-2.28	-1.74	-1.38	-1.39	-2.83	0.95	2.58	-3.04	-0.73	-1.78	-0.69	-1.36	-1.36	-3.2	1.27	-2.32	-1	-0.56	1.57	-1.51	2.19	-4.24	1.25	-3.1	-1.62	-0.03	-1.77	-3.43	-0.3
ARIH2OS	-0.04	-1.46	1.44	1.41	-1.38	-0.19	1.2	1.01	0.5	1.39	0.1	1.26	-0.98	0.02	-0.07	-0.43	0.99	-0.76	-0.47	0.1	0.37	-0.58	0.64	0.14	-0.23	1.04	0.45	1.41	-1.15	-1.41	-1.14
ASRGL1	0.09	0.58	1.07	0.6	-1.38	1.54	1.21	2.38	1.23	0.59	0.82	-0.01	0.16	-0.17	1.47	0.36	-0.18	0.08	-0.76	-0.58	-0.36	0.85	0.73	0.81	0.05	-0.01	1.57	0.48	0.85	-1.47	0.41
BACE1	-0.18	0.51	-0.35	-0.1	-1.38	1.78	0.48	1.06	0.02	0.31	0.95	0.08	-0.18	0.03	-0.65	0.76	1.79	-0.99	0.21	0.74	0.81	-0.31	-0.03	-0.18	0.86	0.42	-1.27	0.06	-1.8	-1.72	-2.22
C9	-0.64	0.49	-0.67	-1.08	-1.38	0.4	-0.25	2.18	0.07	-0.43	1.5	0.75	-1.37	-0.21	0.21	1.58	-2.35	-0.78	-0.69	-0.31	-0.77	-0.33	1.36	0.65	0.4	1.36	-0.02	1.04	-0.28	-0.53	-0.13
CLIC3	-0.15	-1.62	-1.54	-1.12	-1.38	-0.81	1.25	1.65	0.33	-0.27	-0.17	0.83	0.15	0.76	0.81	0.35	1	0.95	-0.04	-0.27	-0.3	0.29	0.42	-0.01	-0.11	0.98	1.11	-0.48	1.14	1.57	-0.03
CPLX3	0.04	-0.54	-0.42	0.21	-1.38	-1.4	-0.14	-1.84	-0.79	-1.5	-0.42	-0.92	-1.11	-1.67	-0.73	-1	-0.61	-0.17	0.52	-0.43	-0.21	-0.56	0.47	-1.68	-0.68	0.09	-1.06	0.48	0.45	1.03	1.11
CSN3	-0.2	-0.96	-0.7	-1.29	-1.38	-0.18	-0.4	0.05	0.18	-1.8	1.42	0.8	-0.13	-0.01	-0.53	0.59	-0.13	0.65	-0.45	0.89	0.5	-0.73	1.14	1.01	1.17	1.46	1.59	-0.93	0.91	0.05	0.69
EXOSC3	-2.15	-0.61	-0.83	-1.49	-1.38	-0.41	1.05	0.29	-0.48	-0.8	-0.47	-0.91	-0.08	0.19	-0.3	0.86	-1.68	0.02	4.04	3	3.69	-0.14	0.31	0.04	-1.1	-0.76	-0.63	0.52	-2.47	0.7	-1.46
FAM160A2	-0.9	-0.52	-0.13	-1.37	-1.38	-0.51	-0.19	0.16	0.12	0.17	-0.11	-0.25	-1.12	-0.53	1.01	-0.84	1.53	0.35	0.6	0.05	-0.11	0.99	-0.03	-0.19	1.28	0.69	-0.25	-0.32	0.66	0.08	-0.37
FAM71F1	-0.73	-1.58	-0.53	-1.28	-1.38	-0.54	0.3	0.7	-0.49	0.95	0.29	0.35	0.28	0.85	-0.57	-0.62	-1.34	-1.08	-0.81	-0.86	0.23	0.44	-0.01	-0.94	1.1	0.96	0.55	0.46	-0.97	-0.29	-0.3
GPBAR1	-1.83	-0.41	-0.94	-2	-1.38	1.78	-0.07	0.06	0.49	1.27	-0.54	0.6	-1.01	-0.72	0.04	-0.29	0.77	-0.23	-0.66	-1.38	-1.12	0.83	-0.47	-0.25	-1.57	0.29	0.32	-1.58	1.16	-0.36	0.63
GPR34	0.66	-0.42	-1.16	-0.67	-1.38	1.32	0.89	0.79	1	0.12	1.09	0.95	1.55	0.57	0.4	-2.24	-1.7	-0.98	-1.03	-1.31	-1.43	-0.11	0.21	0.05	0.31	-0.65	-0.08	0.51	0.96	-0.32	1.95
HACE1	-1.48	-1.03	-0.07	0.08	-1.38	-1.05	1.12	0.45	-0.95	0	-0.27	0.33	-0.6	0.22	-0.23	-0.2	-1.43	-1.53	-0.65	-1.23	-0.47	0.38	1.51	-0.53	-0.05	0.05	1.5	-0.68	0.24	-1.18	0.13
KLHL32	-0.73	0.2	-0.81	-1.32	-1.38	-0.14	0.7	-0.24	0.51	0.82	1.05	1.19	-0.91	0.25	-0.12	0.05	0.43	0.81	0.6	0.29	0.82	0.47	-0.13	0.16	0.49	0.68	0.8	0.83	-0.58	-0.73	-1.41
MAGEB5	-0.81	-0.64	-0.54	-0.86	-1.38	0.83	-0.86	-0.26	-0.52	0.17	0.17	-0.2	-0.24	0.39	0.91	0.75	-1.24	-1.03	-1.23	-0.67	-0.45	-1.8	0.31	0.69	0.34	0.4	0.19	-0.48	0.03	0.3	1.51
MUSK	-0.49	-0.35	-1.48	-0.79	-1.38	0.28	1.04	0.17	0.11	1.09	-1.4	-1.12	0.28	-0.15	-0.88	0.09	-0.43	-0.48	-1.39	-0.08	0.55	0.31	0.39	0.26	0.6	0.75	0.27	0.47	0.3	-0.57	-1.8
MYOZ1	-0.85	1.86	-1.62	-1.18	-1.38	-0.47	0.87	0.01	-0.92	-1.4	-0.03	0.64	-0.54	-0.65	-0.25	-0.08	1.5	0.58	0.38	1.72	1.36	-1.39	-0.29	0.5	1.18	-0.41	0.05	-2.19	1.73	1.68	1.92
NDUFA13	-0.04	-0.32	-0.92	-0.8	-1.38	0.79	-0.34	0.38	-0.82	-1.58	-0.38	1.23	0.56	-0.42	0.51	1.26	1.59	2.42	2.45	2.86	1.72	0.93	-1.34	-0.89	-0.31	-0.36	0.16	-0.36	0.33	1.45	0.48
OR10J1	-0.57	-0.93	-1.15	-0.49	-1.38	0.07	-0.42	0.04	0.05	0.26	-0.13	-1.54	0.82	0.53	0	-0.54	-0.17	-0.6	-0.08	0	0.19	0.85	-1	-0.04	-1.07	0.44	-0.94	-0.74	-0.3	-0.51	-1.55
PET117	-0.65	0.51	-0.21	-0.94	-1.38	-0.92	-0.23	0.18	-0.95	0.74	1.54	0.85	1.14	0.39	1.57	-1.22	0.93	0.15	0.27	0.16	-0.23	0.71	0.47	-1.6	1.6	-0.53	-0.3	0.51	0.67	1.83	1.01
PLA2G2C	-0.21	-0.05	-1.66	-1.6	-1.38	0.72	1.32	1.45	0.77	0.73	0.98	0.32	-0.8	-0.82	1.25	0.37	-0.3	-0.12	-0.14	-0.01	0.39	-2.22	0.08	0.25	0.77	0.74	0.94	0.23	-0.24	-0.75	-2.14
PTGER2	0.72	-1.02	-0.3	0.21	-1.38	0.17	0.01	0.89	0.41	0.64	0.87	-0.23	-0.24	0.79	0.46	-0.03	0.35	0.53	-0.17	-1.12	-1.07	-0.1	0.5	0.74	0.44	0.42	0.29	1.34	-1.41	-1.56	-1.27
RAB40C	2.16	-1.94	0.55	1.42	-1.38	-1.48	-0.95	-0.33	-0.72	-2.44	-0.48	1.1	1.52	0.86	0.17	-1.57	0.13	-1.79	-0.57	-0.69	-0.14	-1.54	0.96	-1.55	-0.33	-0.71	-0.06	0.79	0.21	-0.31	-0.64
RIN2	1.1	0.24	-0.68	0.23	-1.38	-0.2	-1.07	0.67	-1.08	0.24	-1.52	-0.41	0.59	0.77	0.09	-0.11	1.19	0.06	-0.07	-1.82	-1.67	-0.04	0.19	0.25	-0.38	-0.68	0.19	1.02	-2	1.11	0.57
RRNAD1	-0.64	-1.07	-1.54	-0.54	-1.38	1.01	0.13	-0.05	-0.18	0.02	1.7	1.38	-0.86	1.4	0.7	0.38	1.6	-0.51	-0.35	1.02	1.02	-0.89	-1.43	-0.45	-1.32	-0.91	-1.86	0.13	-0.35	-0.33	-1.07
SEMG1	-0.69	-1.58	-1.26	-1.21	-1.38	-1.41	-0.15	0.18	-1.61	0.16	0.36	1.07	-0.58	-1.28	-0.2	-1.06	-0.3	1.43	1.02	-0.83	-0.66	1.62	0.27	0.37	0.17	0.63	-0.06	0.04	0.2	1.58	0.1
SLC26A6	-0.3	-0.13	0.71	-0.13	-1.38	0.7	0.32	-0.03	-0.2	0.47	1.63	1.01	0.81	-0.03	0.72	-1.03	-0.28	-0.47	-0.28	-0.37	-0.04	-0.23	-0.38	0.57	0.25	1.37	0.54	0.66	-1.52	-0.33	-1.26
SLC6A12	0.25	-0.67	0.39	0.01	-1.38	0.06	0.2	0.43	0.48	0.03	-0.71	-0.75	-0.82	0	-0.2	-0.75	0.16	-0.77	-0.34	0	0.11	-0.39	-0.73	0.77	-0.22	0.11	-1.27	0.38	-1.02	-1.58	0.67
UEVLD	-0.16	-0.52	-0.07	-0.32	-1.38	-0.2	-0.19	-0.17	-0.37	-0.12	0.41	0.94	-1.67	0.69	0.07	0.52	2.32	0.73	-0.53	-0.41	-0.11	-1.05	0.37	0.34	0.21	0.23	0.56	0.73	-0.5	-0.69	-0.29
UGT8	-0.79	-2.4	-0.63	-1.19	-1.38	0	-1.57	-0.25	-0.11	0.02	-0.86	-0.81	0.83	1.1	-1.04	1.18	0.64	-0.61	-0.84	-1.85	-2.08	0.01	0.09	-0.07	-0.16	0.24	0.48	1.28	-0.86	-1.32	-0.71
UPK3BL	0.23	-0.89	-0.44	0.07	-1.38	-0.3	-0.41	-0.6	-0.74	-0.71	1.28	0.05	-0.89	0.01	0.39	0.75	1.13	0.73	1.77	0.47	0.53	1.35	1.14	0.87	1.11	1.7	2.02	1.24	1.35	-0.94	0.19
XAGE3	-1.66	-0.1	-2.26	-1.89	-1.38	0.15	0.97	0.88	0.5	-0.03	-1.76	-1.22	-1.15	-0.4	-0.18	-0.46	-0.28	-0.6	-0.51	-0.48	-0.44	0.72	-0.21	-0.45	0.72	-0.05	-1.29	-0.53	0.6	0	1.45
ZP2	-1.19	-1.42	-2.26	-1.59	-1.38	0.26	0.11	0.49	-0.02	0.3	-1.05	-3.24	0.04	-1.2	0.19	0.83	0.75	1.02	0.46	0.02	-0.23	1.63	0.59	0.46	0.82	-0.29	0.3	0.4	-0.36	-0.3	-0.64
ABCC5	-0.2	0.57	-0.14	-0.35	-1.37	-0.16	0.4	-0.37	-2	-0.63	1.18	-0.29	0.02	0.72	-0.84	-0.64	1.74	0.4	0.88	-0.02	0.47	-0.23	-0.3	0.86	-0.6	-0.03	-0.35	-0.88	-0.62	0.41	1.13
AKR1E2	0.29	-0.09	-0.36	-0.59	-1.37	-1.32	-1.95	-0.39	-1.38	-0.23	0.03	-1.13	1.03	0.34	0.85	-0.14	-0.78	-1.32	-1.1	0.15	-0.72	-0.89	0.33	-0.88	-0.47	-0.93	-1.32	-0.52	0.89	1.55	1.57
ARHGAP26	1.17	-2.21	-0.21	-0.55	-1.37	-0.01	-1.44	-1.81	-0.48	-0.74	-0.31	0.18	0.78	1.36	0.85	0.46	0.23	-0.4	0.48	-0.36	0.3	-1.88	-0.52	-1.62	-1.73	-2.27	-2.23	0.7	1.14	0.34	0.75
ATOH8	-0.78	-1.58	-0.55	-1.14	-1.37	-1.99	-1.66	-0.84	-1.8	-0.35	-0.39	0.76	0.75	1.26	0.65	0.49	-1.22	0.27	0.07	-0.95	-0.74	1.43	-1.12	-0.79	-0.96	-0.63	-1.04	-0.06	0.35	-0.96	-0.16
BBS1	-0.97	-1.25	-1.34	-1.33	-1.37	-1.02	0.84	1.3	-0.8	0.48	0.18	0.18	0.62	0.3	-1.08	-0.13	0.28	-0.63	-0.41	-0.1	0.37	-0.92	-0.83	0.05	-0.27	0.17	-0.35	2.21	-0.79	0.26	0.1
C11orf91	-0.26	-0.73	-2.17	-0.89	-1.37	-0.27	-1.5	-0.91	-0.51	-0.22	-1.21	-0.37	0.36	0.41	0.62	-1.14	0.44	-0.17	0.39	0.69	1.13	0.29	-0.43	-0.04	0.4	-0.23	-0.44	0.17	-0.79	-1.63	-0.47
C5orf34	-1.55	-1.32	-0.06	-0.71	-1.37	0.14	-0.45	-0.21	-0.72	0.58	-1.85	-1.64	-0.88	0.31	-0.55	-2.5	-0.5	-0.7	-0.45	-0.83	-0.35	-0.43	1.57	0.71	0.47	1.41	0.76	-1.1	-2.29	-2.25	-2.4
CDC42EP5	-0.4	-0.27	-0.18	0.36	-1.37	-0.22	-0.89	0.02	0.07	-0.94	0.23	1.5	-1.22	0.98	0.17	-0.88	0.06	-0.2	-0.81	-0.01	-0.05	-0.56	-0.8	0.77	0.08	0.59	-0.22	0.4	1.16	-0.59	0.14
CRB2	-0.14	-0.8	-1.24	-1.55	-1.37	1.44	0.31	0.33	0.4	0.09	0.34	0.28	-1.17	-0.31	1.07	-0.91	0.76	1	0.3	0.18	0.77	0.89	0.85	-0.37	0.24	0	0.34	-0.21	0	0.3	-0.43
EEF1A2	1.58	0.75	1.94	1.69	-1.37	0.78	0.33	0.09	0.02	1.13	-0.77	-0.13	0.12	1.55	0.74	-1.12	0.22	-0.63	-0.16	-0.42	-0.44	-0.63	-0.83	-0.88	-0.36	-0.05	0.67	-0.04	0.4	0.84	0.92
FOXM1	-1.94	-3.72	-1.94	-0.19	-1.37	-2.11	-0.72	-1.36	-2.79	-0.02	-1.71	-1.38	3.63	-2.84	-2.88	0.14	-0.26	1.67	0.98	1.68	0.96	-0.47	-1.72	-2.98	-0.53	-2.41	-0.27	-7.34	-0.59	-1.01	0.14
GPR139	-0.47	-1.41	-0.17	-1.96	-1.37	-1.88	-1.46	-0.9	-1.25	-0.75	-0.84	-1.49	-0.03	0.23	0.75	0.73	-1.78	-1.74	-1.43	-0.56	-0.56	-0.04	0.89	1.04	-0.19	1.02	0.72	-0.58	0.22	-0.13	0.31
IL25	-0.08	-0.94	0.8	0.17	-1.37	-1.72	0.74	-0.93	-0.59	-0.12	0.74	-0.7	-0.97	0.18	0.64	-0.72	0.42	0.38	0.28	-0.52	0.12	0.76	0.91	-0.35	1.22	0.85	1.01	0.5	1.29	1.07	1.97
KCNN1	-1.61	-0.01	-1.56	-0.61	-1.37	0.47	-0.66	-0.48	0.17	0.56	-1.65	-0.09	0.67	0.73	-0.42	-0.13	-1.07	-0.46	-0.3	0.11	-0.13	0.05	-0.78	-0.44	0.32	0.08	1.51	-0.07	0.37	0.1	-0.35
KRTAP20-1	-0.76	-1.21	-1.61	-0.8	-1.37	1.78	-0.48	-0.07	-0.05	-0.41	NA	NA	NA	NA	NA	-0.71	NA	NA	NA	NA	NA	-0.23	-1.89	-0.09	-0.74	0.74	-1.05	-0.03	-0.29	-1.35	-1.19
MTHFD1L	-1.4	0.32	-1.55	-1.34	-1.37	1.03	0.25	1.45	1.1	0.15	-1.72	-1.03	-1.67	1.75	0.93	2.02	0.19	-1.66	-0.48	-0.66	-1.3	-0.41	0.73	0.58	0.67	1.03	-0.28	-0.18	-0.89	-0.33	-1.36
MYH15	-0.19	-1.06	-0.29	-0.3	-1.37	-0.03	-0.9	-0.51	-0.26	0.87	0.44	0.05	-0.91	0.09	0.67	0.43	-0.46	-0.22	-0.18	1.21	1.39	1.18	-0.99	-0.17	0.89	-0.38	0.2	-0.03	-1.49	-1.28	-0.22
NSDHL	-1.3	0.1	-0.29	-0.46	-1.37	0.67	1.95	1.64	0.78	2.05	-0.34	0.21	0.69	0.1	-0.25	-0.2	0.01	0.11	-0.67	-0.13	0.27	-0.29	-0.25	0.29	0.81	0.8	-0.13	0.3	-0.54	0.86	-0.41
PDPN	0.47	-0.02	0.13	-0.48	-1.37	0.11	0.86	0.23	0.96	0.49	0.47	0.4	-0.27	0.39	-0.33	-0.15	-1.32	-0.62	-0.69	0.67	0.52	0.2	0.46	0.13	0.47	0.45	0.87	0.03	0.57	0.64	0.69
PLXNC1	-0.52	0.71	-0.71	-0.49	-1.37	0.43	0.72	0.7	0.43	0.92	1.75	0.41	-0.11	1.05	1.27	-1.12	0.35	-1.02	0.34	-0.52	-0.46	2.01	1.05	0.08	-0.3	0.39	0.27	-0.03	-1.49	-1.09	-1.54
PPP1R3A	-0.18	0.19	0.47	0.06	-1.37	-0.59	0.19	-0.3	-0.91	0.1	-1.25	-1.74	0.25	0.82	-0.54	0.44	0.82	0.56	0.67	-0.25	-0.61	0.58	-0.32	-0.34	-1.3	-1.38	-3.3	1.36	-0.45	-1.11	-1.88
QSOX1	0.68	-1.67	-1.02	-0.47	-1.37	-1.12	-1.88	-0.58	-1.18	-0.69	0.34	1.08	-1.52	0.3	-0.24	-0.32	-1.76	-0.33	-0.36	0.91	0.33	0.13	-1.06	-0.12	0.22	-0.04	-0.78	-0.33	0.51	0.86	0.62
ST8SIA3	-0.57	-1.91	-1.28	-1.68	-1.37	-0.65	-1.65	-0.65	-0.67	-1.33	-1	-1.23	1.34	-0.03	-0.38	0.37	-1.22	-0.21	-0.16	0.48	0.24	-0.22	-0.3	0.47	0.98	-0.05	-0.19	-0.68	0.26	0.24	0.82
TF	-1.1	-0.51	-1.67	-0.45	-1.37	0.13	0.96	0.29	0.05	1.63	0.18	-1.03	0.67	0.3	1.04	0.68	-1.67	-2.21	-1.31	-1.79	-2.06	-0.78	1.41	0.55	-0.07	0.46	1.14	0.83	-1.14	-0.31	-0.47
TMEM258	0.63	-0.41	-0.61	0.77	-1.37	0.21	0.63	0.08	0.55	0.13	0.64	-0.68	2.44	0.81	0.46	-0.92	0.18	2.18	0.01	0.85	0.28	-0.65	0.14	1.28	1.05	1.1	0.51	-0.42	-0.4	-0.25	-0.15
TNNI1	-0.56	0.76	0.71	0.48	-1.37	0.5	1.32	-0.09	-0.7	-0.64	0.49	0.31	0.52	0.41	0.43	-0.7	-0.27	0.24	-0.03	0.56	0.29	1.08	0.12	-0.52	0.68	0.09	0.53	-0.53	1.24	0.33	0.84
TOP1	-1.95	0.19	-4.19	-2.94	-1.37	-1.49	0.52	-1.06	-1.83	0.16	0.31	-0.08	0	0.21	-0.54	-1.78	-1.07	-0.73	0.1	0.39	-0.42	0.99	-0.85	-0.27	-0.97	-0.19	0.3	1.66	-0.43	-0.74	-0.37
CBLB	0.32	-0.19	0.47	0.3	-1.36	0.98	1.74	2.54	2.37	1.73	-0.12	-1.36	-1.58	-0.38	0.53	1.18	-1.23	-1.42	-0.32	-0.28	-0.65	-1.18	0.43	0.95	0.59	0.23	-0.03	-1.58	-2.33	0.74	-1.34
CCDC173	-0.58	-1.16	-0.43	0.16	-1.36	-0.55	1.11	-0.47	-0.62	0.51	-1.5	-0.17	-0.71	0.55	0.1	-0.26	0.71	-0.49	-0.85	-0.59	-1.19	-0.22	0.83	0.71	-0.27	0.04	0.65	0.97	0.19	0.3	0.34
CCL1	-1.71	-0.16	-1.42	-1.12	-1.36	-0.27	0.93	0.49	-0.02	-0.49	0.92	1.55	-0.39	-1.48	0.33	0.91	0.76	0.18	-0.48	0.73	0.78	0.67	0.36	0.26	0.22	1.1	-0.02	0.85	-1.03	-0.46	-1.28
CNIH1	-1.93	-0.01	-1.79	-1.42	-1.36	0.51	0.42	0.14	0.7	1.39	0.99	1.41	-0.43	-0.21	-0.19	0.88	-0.76	0.48	-0.81	-0.93	-0.91	0.01	1.42	0.1	0.36	0.61	0.85	0.95	0.62	-0.52	-0.31
ERP27	-0.65	-1.41	0.03	-2.05	-1.36	1.59	0.76	2.1	1.32	1.76	-1.37	-0.82	0.19	0.69	-0.11	-1.85	-0.11	0.62	-0.24	-0.49	0.08	-0.17	0.28	0.51	1.22	0.48	0.4	-0.46	-0.54	-0.75	0.47
GJB5	0.53	-0.38	0.62	0.89	-1.36	0.46	0.27	0.97	0.21	0.94	-0.43	-0.62	-0.38	-1.25	1.16	-0.08	-0.65	-1.66	-0.84	-0.99	-1.17	-1.95	0.55	-0.91	-0.93	-0.9	-0.79	0.32	1.23	1.63	0.79
HDAC6	-1.15	0.37	-0.48	-0.61	-1.36	0.72	1.06	1.15	0.69	0.64	-0.23	0.49	1.15	1.02	0.6	-1.13	-0.65	0.3	-0.4	0.48	0.52	-2.78	0.63	0.26	1.49	0.11	-0.08	-0.5	-0.16	-0.79	-1.29
KCNH8	0.28	-1.13	-0.09	-0.4	-1.36	-0.29	-1.51	-1.13	-0.55	-1.82	0.97	-0.81	0.35	-1.45	0.26	-0.36	0.09	-0.5	-0.79	-1.05	-0.66	-0.69	0.46	0.55	-0.6	-0.59	-0.18	-0.55	-2.27	-0.47	-0.54
KLRG2	-0.84	0.05	-0.46	0.16	-1.36	0.2	-0.11	0.91	-0.61	0.14	-1.06	-0.11	-0.51	-0.71	-0.31	0.68	-0.66	-0.8	-0.67	-0.24	-0.11	0.77	-0.95	-0.83	-0.48	-0.74	-1.51	0.36	0.62	1.1	1.22
MAP4	0.09	-1.56	-0.46	-0.17	-1.36	-0.47	-0.78	0.65	-0.08	-0.17	0.02	-0.22	0.83	-0.38	0.01	0.42	-0.32	0.18	0.03	-1.79	-1.72	0.09	-0.3	-0.37	-1.7	-0.7	0.36	0.55	0.09	0.6	1.05
MRPL13	-1.33	-1.25	-1.49	-1.13	-1.36	-0.57	-0.07	-0.76	-1.15	-0.76	1.2	0.48	0.41	-0.33	0.63	-0.47	2.42	-0.68	1.86	1.89	1.57	-0.26	-0.42	-0.26	1.58	1.02	1.94	-1.76	0.22	1.1	0.48
MSS51	-0.16	0.79	-0.88	-0.21	-1.36	-0.86	-0.78	-1.05	-0.71	0.58	0.11	-0.39	-0.97	-0.01	0.68	0.67	1.42	-0.38	-0.81	0.36	-0.71	-0.38	0.58	0.3	0.6	-0.47	0.39	0.72	0.07	0.46	1.07
NMRK2	0.24	-0.39	1.25	-0.02	-1.36	0.5	-1.06	-0.61	0.63	0.25	0.49	0.51	0.82	-0.15	-0.41	-0.29	-0.02	0.16	-0.3	-0.63	-0.16	0.41	0.76	0.65	0.82	0.94	0.52	0.58	0.43	0.92	0.51
NUDC	-1.25	-1.15	0.38	0.15	-1.36	1.4	0.64	0.38	0.88	0.13	0.53	0.43	-0.41	0.13	0.33	0.83	-0.13	-0.21	2.66	4.34	4.13	1.07	-0.37	2	-0.67	0.06	0.68	-0.02	-1.02	-0.21	-1.05
OR2Z1	-0.45	-0.09	-1.42	-1.19	-1.36	-0.54	-0.02	-0.59	-0.34	0.2	-0.34	-0.69	-0.65	0.2	1.79	-1.14	0.35	-0.49	-1.38	0.17	-0.45	-0.72	-1.2	0.2	0.62	-0.83	-0.31	-1	0.73	-0.09	0.44
OR4A15	-0.74	-1.49	-0.59	-1.81	-1.36	1.37	0.5	1.18	1.73	0.76	-0.34	-0.97	-0.56	-0.81	-0.08	-0.58	0.49	1	-0.18	-0.8	0.63	1.64	-0.01	0.36	0.25	-0.06	-1.21	-0.63	0.24	0.73	0.14
P2RY2	-1.61	-0.92	-2.05	-2.01	-1.36	-1.18	-1.63	-0.06	0.08	-1.02	1.22	1.09	-0.14	0.32	0.46	0.52	1.37	-0.17	-0.2	-0.13	0.91	-0.95	-0.24	-0.23	-0.03	-0.72	0.01	-1.05	1.21	-0.25	-0.1
PEX2	-0.56	0.28	0.54	0.11	-1.36	-0.93	-1.04	-0.87	-1.59	-1.11	0.25	-0.74	0.28	-0.87	0.08	-0.29	0.8	-2.2	0.43	0.45	0.06	-0.97	-0.42	-0.21	-1.07	0.15	0.35	0.13	-0.08	-0.57	0.61
PIEZO1	-0.33	0.6	1.09	-0.9	-1.36	-0.24	1.48	-0.48	1.45	0.47	0.22	1.22	-0.18	1.42	0.26	-1.17	0.61	-0.31	0.4	1.23	0.83	1.31	0.24	-0.38	-0.83	-0.55	-1.11	0.32	-0.4	-0.72	-0.37
PITPNB	1.78	-0.63	0.64	1.89	-1.36	-1.68	0.15	-0.57	-0.71	0.3	0.77	1.48	-1.44	-1.31	0.42	0.28	-1.02	-0.69	-0.3	-0.66	-2.18	-1.3	-1.85	-0.21	-0.82	-0.06	-1.23	-2.08	-1.14	0.49	-1.77
RAB43	0.26	0.08	0.23	-1.3	-1.36	-0.38	0.82	-0.07	-0.17	1.34	0.56	2	0.12	0.04	0.86	0.5	2.08	1.04	-0.69	-0.09	0.54	-0.58	-0.65	-1.13	0.76	1.09	-0.23	0.09	0.61	0.34	-0.59
RNF34	-1.65	-0.5	-0.72	-1.3	-1.36	0.53	0.17	-0.44	0.82	0.05	0.63	-0.3	-1.15	0.58	0.34	-0.16	-0.62	-0.79	-0.82	-0.05	-0.12	0.04	0.61	0.29	1.33	0.65	-0.7	0.12	-1.37	0.5	0.85
RNPC3	-1.39	0.49	1.08	-0.92	-1.36	0.77	0.51	1.56	1.37	0.36	-0.66	0	1.23	-0.11	-1.08	-0.02	-0.71	-0.22	0.25	-0.25	0.49	2.92	0.56	-1.14	0.19	0.97	0.3	0.22	-0.35	-0.39	-1.77
SLC2A10	-0.45	-0.37	-0.79	-0.25	-1.36	-0.17	0.04	-0.63	-0.53	-0.22	0.15	-0.18	-0.01	0.43	1.01	-0.26	1.57	1.25	-0.35	-0.93	-0.75	-0.47	-0.27	-0.5	1.04	0.43	1.3	0.22	1.02	0.02	-0.24
SYCE2	-0.76	-2	-2.71	-0.45	-1.36	-1.47	-1.07	0.24	-1.36	-0.85	-0.9	-0.24	-1.66	0.41	0.26	0.72	-1.05	0.15	-0.39	-0.01	-0.73	0.35	-0.87	-0.38	-1.37	0.6	0.81	0.2	0.53	-1.14	-0.22
TPD52L1	0	-0.57	-0.78	-0.68	-1.36	-0.46	-0.67	-0.27	-0.55	0.25	0.71	-0.2	0.38	-0.31	0.15	-0.68	0.26	-1.64	-1.19	-0.88	-0.88	-0.1	-0.1	0.29	0.07	-0.24	-0.13	0.83	0.15	-0.56	-0.43
TSHZ1	-1.43	-0.45	-1.06	-0.27	-1.36	1	-0.16	0.19	-0.31	1.15	0.22	-2.36	-0.31	-0.07	0.04	-0.84	0.84	0.75	0.02	0.61	0.27	-0.26	-0.44	0.12	0.29	0.39	0.74	-0.75	0.75	-0.31	-0.31
ZNF536	0.25	0.72	0.25	-0.07	-1.36	-1.7	1.39	0.31	0.53	-0.67	0.26	1.86	1.03	0.46	0.29	0.42	0.99	0.55	-0.54	-0.18	0.12	-0.34	1.66	0.99	0.89	1.01	0.6	-0.63	-0.67	0.15	0.67
ADH6	1.13	1.17	0.23	1.04	-1.35	0.87	0.11	0.95	0.08	0.72	0.4	-0.66	0.26	-0.06	0.01	0.89	0.47	1.27	-0.06	-0.02	0.75	0.57	-0.2	0.53	0.48	1.09	0.78	-0.37	-1.24	0.43	-0.42
C21orf54	-0.55	0.52	-0.35	-0.51	-1.35	0.2	0.17	0.39	-0.63	1.24	-1.17	-0.42	0.32	-1.1	0.26	0.34	0.59	0.84	0.85	0.22	0.2	-0.14	1.44	0.56	1.1	1.02	1.76	-0.43	-0.39	0.29	-0.23
C9orf92	-0.64	-1.26	0.28	-0.34	-1.35	-1.2	-0.89	-0.12	-1.35	-0.94	-0.55	-0.68	0.01	0.45	1.16	0.86	0.05	-0.2	-0.04	-0.46	-0.19	-1.05	1.32	0.58	0.14	1.3	0.18	-0.76	-1.08	0.73	-3.22
CYTL1	-1.15	0.17	-1.72	-1.3	-1.35	0.57	-0.13	0.9	0.83	-0.26	-0.84	0.89	0.23	0.26	-0.22	-0.03	-0.91	-2.26	-2.88	-1.24	-1.12	1.54	0.47	-0.44	1.37	1.09	0.78	-0.31	1.24	0.8	-0.17
DEFB115	0.27	-1.54	-0.14	-0.49	-1.35	-0.83	-0.98	-0.21	-0.77	0.22	-0.81	-1.27	-1.04	0.71	0.22	0.68	-0.66	1.62	-0.1	0.11	0	-0.2	0.11	1.03	1.19	0.06	0.52	-0.59	0.19	-1.06	0.93
FBLN1	0.22	-0.31	-0.07	-0.45	-1.35	0.33	0.01	-1.14	0.24	0.03	0.17	0.76	0.06	-0.04	0.47	1.22	-0.38	-1.12	-0.02	-0.72	-0.56	-0.19	0.96	0.19	0.73	-0.49	0.61	0.73	-0.37	0.67	-0.33
GRIK3	-1.33	0.77	-0.28	-1.97	-1.35	1.03	0.23	0.88	0.94	0.22	0.24	-1.21	0.53	-0.17	0.35	0.53	0.56	-0.62	-1.53	-0.88	-0.76	1.52	-0.73	-0.65	-0.14	-0.4	-0.52	-1.63	-1.2	-1.06	-0.76
KIAA0040	-0.97	-0.72	-0.12	-1.77	-1.35	-0.59	0.12	-0.51	-0.5	0.77	0.51	0.37	-1.86	0.71	0.12	0.54	1.2	-0.05	0.75	0.04	0.08	-0.42	0.38	-0.59	-0.07	0.59	1.06	0.5	0.36	0.93	1.73
PCDHB2	-0.71	-1.12	-0.74	-0.95	-1.35	-0.23	-0.47	-0.42	-0.9	-0.09	0.24	0.28	-0.5	-0.36	-0.18	-0.62	-0.83	-0.26	-0.31	0.29	0.36	1.07	0.72	0.22	0.77	0.36	0.64	-0.6	1.1	1.15	-1.27
PCDHGA11	0.12	0.5	0.09	-0.16	-1.35	0.06	1	0.68	0.41	0.86	0.14	1.43	-1.06	0.19	-0.62	-0.06	0.96	0.53	-0.45	0.47	0.65	0.1	-0.35	0.17	0.52	0.14	-1.2	-0.72	1.74	1.9	2.17
PFKFB4	-1.64	-1.39	-1.87	-2.2	-1.35	0.86	1.24	0.5	1.54	1.38	-0.04	0.34	0.09	-0.21	0.92	-0.24	-0.23	0.27	-0.46	-0.78	0.56	1.32	0.48	0.79	0.36	0.18	0.84	-0.05	1.33	0.14	0.37
PKP2	-0.8	0.04	-1.05	-1.28	-1.35	0.4	-0.81	-0.16	0.06	0.6	-0.37	-2.98	0.47	0.19	0.12	1.1	0.8	-0.47	-0.36	0.66	0.29	1.16	0.18	-0.05	0.42	0.29	0.37	-0.2	-0.12	-0.68	-0.23
RAB5C	-0.41	0.21	-0.24	-0.16	-1.35	0.88	-1.14	-0.8	0.42	-0.76	1.74	0.97	-0.89	-0.69	0.69	-0.05	0.16	0.96	0.75	-0.04	0.07	0.2	-0.7	-1.39	-0.36	-0.14	-0.1	0.03	0.84	-0.73	0.71
SDHAF1	0.82	0.04	0.41	1.01	-1.35	1.25	-0.34	-0.25	1.08	0.49	1.91	3.1	0.67	0.31	0.56	1.25	0.22	0.3	-0.06	0.7	0.69	1.6	0.68	1.23	0.14	1.53	-0.21	-0.05	1.54	1.02	-1.63
SGPP1	-0.14	0.01	-0.31	-1.19	-1.35	-0.41	-0.9	-1.29	-0.22	0.25	0.67	-0.55	-0.35	-0.6	1.34	-0.16	-0.01	-1.02	-0.68	-0.51	-0.58	0.5	0	0.44	0.3	-0.29	-0.41	-0.88	0.47	-0.1	0.5
SHF	0.63	-1.14	-1.27	0.64	-1.35	-0.39	-0.06	-1.84	0.47	-1.1	-0.05	0.33	-0.21	-0.24	-0.19	-1.97	0.61	0.31	0.56	-0.58	0.73	-0.33	-0.54	-0.45	-0.05	1.01	2.11	0.47	-0.22	-0.75	-1.07
SLC17A9	-0.09	-0.37	-0.23	0.33	-1.35	0.46	-0.18	-1.8	-1.23	-1.35	-0.11	0.36	0.48	0.36	0.06	-0.71	0.77	0.31	-0.24	-0.89	-0.66	0.42	0.47	0.26	-0.35	-1.02	-0.05	-0.45	0.29	0.92	1.53
SOX11	-0.15	-0.18	-0.41	-0.74	-1.35	0.72	1.95	2.03	1.42	0.45	0.77	1.85	0.17	0.07	0.54	-0.67	0.72	-1.89	-0.86	0.76	1.43	0.11	1.43	0.12	1.02	-0.25	0.55	0.11	1.45	0.84	1.61
TAF5L	-1.02	-1.67	-0.17	-0.44	-1.35	-1.09	-0.78	0.66	-1.41	-0.85	2.06	-0.14	-1.94	0.13	-0.72	0.6	1.74	3.02	1.06	0.01	-1.77	0.04	-0.44	2.35	2.6	2.61	0.39	-1.07	-1.27	-2.29	-1.6
TAS2R41	-1	-0.5	-0.43	-0.75	-1.35	-0.02	0.79	0.63	0.17	-0.96	-0.01	-0.86	0.63	-0.17	0.01	-0.53	0.75	-0.05	-0.5	-1.27	-1.12	0.57	0.35	-0.83	0.07	-0.21	-0.4	-0.14	-0.4	0.43	-0.49
UFC1	-1	0.84	0.14	-1.3	-1.35	1.03	0.51	-1.95	-0.05	-3.61	2.39	0.76	0.2	-0.2	-1.02	0.11	-1.32	1.43	1.1	-0.23	-0.96	-0.95	-4.94	1.09	-1.52	-2.38	1.24	-1.66	-2.96	-1.88	0.38
UFSP2	-0.11	-1.1	0.57	0.01	-1.35	0.34	-1.26	-1.84	-0.89	-3.94	0.12	-0.99	0.34	-1.34	-2.22	0.88	-0.57	1.74	2.29	1.08	0.22	-0.57	-3.73	0.87	-1.6	-1.55	1.33	-1.98	-6	-3.79	-1.68
ZNF683	-0.57	-0.57	-1.08	-1.71	-1.35	0.77	0.99	1.24	0.91	1.63	-0.66	0.38	-0.59	-0.59	0.46	-2.59	-0.46	-0.08	0.1	-0.49	-0.8	-0.65	1.43	0.91	1.46	1.44	1.26	-0.44	-0.06	-0.45	0.03
BUB1B	-0.04	-0.41	-0.14	-1.07	-1.34	-1.49	0.29	-0.5	-0.67	0.53	-0.92	-0.4	0.72	-0.62	-0.41	0.17	-1.87	-1.74	0.03	1.42	1.19	0.44	0.63	0.09	1.57	0.6	0.53	0.18	-0.13	-0.51	-1.02
C7orf13	-1.28	-1.02	-0.69	-0.82	-1.34	1.64	1.24	1.95	1.81	2.09	1.18	1.26	-0.21	0.02	0.71	0.34	1.21	0.35	0.66	-0.39	-0.26	-0.36	-0.12	-0.72	-0.53	-0.27	-1.47	-0.49	-0.84	-0.8	-0.55
CARD9	1.19	0.34	0.96	0.32	-1.34	0.1	1.27	0.53	0.17	0.9	-1.34	-0.58	-0.43	-0.87	0.78	0.77	-1.79	-1.88	-1.6	0.01	0.95	0.31	0.12	-0.37	0.35	0.38	0.04	-0.71	0.47	0.01	0.26
COX6A2	-0.14	-1.54	-0.2	-0.14	-1.34	-0.14	1.2	1.34	0.57	0.56	1.21	0.49	0.28	0.4	0.18	0.93	0.3	-0.08	-0.92	-1.28	-0.89	-0.49	0.66	-0.46	-0.69	0.39	-0.12	0.32	-0.27	-0.82	-0.97
EPHA4	-0.28	0.06	-0.97	-1.52	-1.34	-0.54	-0.24	-0.53	-0.28	-0.78	2.08	0.18	-1.08	0.02	-0.82	-1.1	0.41	1.52	0.08	-0.92	-0.6	0	0.91	-0.89	0.41	-0.26	-0.58	0.22	-1.27	-0.67	-0.11
FBXL3	-0.84	-0.51	-1.61	-1.59	-1.34	-1.55	-0.09	-0.78	-0.55	-1.29	-0.51	-0.08	0.84	0.38	-0.87	-1.47	0.72	0.3	-1.13	-2.15	-2.06	-1.28	-0.73	0.2	-0.85	-0.26	-0.41	-0.03	1.58	-0.13	0.94
GMFG	0.45	-0.08	-0.7	-0.24	-1.34	-0.7	0.23	-1.19	-0.51	-0.95	-0.65	-1.56	2.18	-0.82	0.26	-0.71	-0.23	0.29	0.33	-1.09	-1.69	-0.77	0.35	0.88	-0.52	0.66	1.3	0.18	0.7	0.96	1.28
HEMK1	-0.43	-0.93	-1.6	-1.3	-1.34	1.32	0.61	2.07	0.42	-0.09	-1.64	-0.89	0.75	0.03	-0.1	0.37	-0.85	0.15	-0.04	0.46	0.7	-1.23	-0.72	0.26	0.32	1.07	-1.05	-0.11	0.07	0.05	-0.54
IGFBP5	-1.05	-2.39	-0.75	0.75	-1.34	-1.16	-0.35	-1.49	-1.31	0	-1.63	0.8	-0.55	0.02	0.26	-0.74	-1.29	-1.12	-0.75	0.58	-0.66	-0.21	-0.16	-0.15	-0.35	0.1	0.58	-0.48	1.03	0.81	1.87
ING5	-1.42	-1.51	-0.97	-0.64	-1.34	0.74	-0.16	0.15	-1.66	0.29	-0.86	-0.5	-0.07	0.39	-0.15	-0.99	-1.57	-2.74	-0.41	0.19	0.03	-1.23	0.81	-0.22	1.42	0.71	0.28	-0.9	0.48	1.25	-0.07
KIF21A	0.35	-0.13	0.05	-0.44	-1.34	0.93	-0.32	-0.04	0.17	0.83	0.29	-0.56	0.34	1	0.77	-0.45	0.75	0.78	-0.04	0.24	0.36	-1.1	-0.67	0	-0.75	-0.14	-1.7	1.2	0.98	-0.31	-0.97
KLK2	-0.67	0.24	-0.08	-1.44	-1.34	-0.21	-1.33	-1.88	-0.55	-0.12	0.84	0.28	1.16	1.55	1.07	0.16	-0.13	1.27	0.93	0.3	0.79	0.45	1.44	0.17	0.02	1.04	1.23	0.56	0.71	1.81	0.23
PDLIM5	-0.04	-0.52	-0.27	0.03	-1.34	-0.38	0.59	0	0.02	-0.16	-1.13	-1.93	0.46	0.23	0.44	-1.47	-1.69	-0.97	-1.65	-0.98	-0.19	0.92	0.1	0.21	-0.34	0.97	0.17	1.11	-0.19	-1.2	-1.63
PREPL	-0.79	-0.11	0.01	-0.96	-1.34	-0.05	-1.18	0.4	-0.58	0.51	0.05	-1.8	0.33	-0.16	0.89	-0.49	-1.87	-1.56	-0.51	-1.37	-0.8	-1.22	0.27	-0.19	0.03	-0.21	0.95	0.59	-1.25	-0.11	-0.29
RBP3	-0.6	-0.63	-0.32	0.75	-1.34	0.44	-0.85	0.19	-0.04	0.41	1.2	1.11	0.09	-0.15	0.02	1.76	1.3	0.9	-0.15	0.14	0.3	-0.02	-0.29	0.71	-0.34	-0.92	0.07	1.56	1.81	0.62	2.11
SAMD4B	-1	-0.58	-0.41	-1.61	-1.34	-0.06	-1.1	-1.35	-0.29	-1.16	0.22	0.55	-0.01	1.54	0.7	-0.24	-0.37	0.86	0.39	1.44	0.27	0.01	-3.14	0.85	-1.01	-0.82	-0.11	-0.82	0.01	-0.17	0.35
TAOK1	1.33	-2.24	0.2	-0.05	-1.34	-4.62	-4.9	0.01	0.16	-4.97	-1.28	-2.48	1.53	-1.34	-1.13	-7.76	0.66	-3.31	-4.26	-2.15	0.38	-3.64	2.85	-6.38	0.71	-5.48	-1.95	-1.72	-1.82	-4.92	3.05
TMPRSS11E	0.62	0.38	-0.44	-0.07	-1.34	1.43	1.23	0.91	0.45	0.64	1.03	0.66	1.07	0.28	0.84	0.32	1.06	0.28	-0.39	-0.41	0.82	0.01	-0.19	0.4	0.69	0.91	0.56	0.58	0.38	-0.5	-1.26
VCAN	-1.91	0.05	-1.63	-2.38	-1.34	-0.36	-0.54	1.02	0.26	0.46	-0.52	-1.15	-0.95	0.18	-1.42	-0.82	-0.79	-0.37	0.18	0.67	0.77	0.74	0.09	0.2	0.85	0.84	0.55	0.21	0.23	-0.11	1.38
WDTC1	0.22	-0.7	-0.41	-0.82	-1.34	-0.41	-0.03	-0.34	-1.23	-0.21	-1.65	-0.28	-0.03	-0.25	1.42	-0.76	0.74	0.54	0.51	0.48	0.27	-1.42	0.6	0.06	0.06	0.29	0.65	-1.72	-0.3	0	-0.88
BCL2L2	1.09	0.58	0.2	0.92	-1.33	-0.67	0.54	0.26	0.36	-0.1	-0.14	0.28	-0.66	-0.56	-0.88	-0.83	-0.46	0.39	-0.74	-0.32	-0.61	-0.18	1.2	-0.01	0.97	0.68	-0.27	-0.09	0.26	1.17	0.12
CCBE1	-0.88	-0.9	-0.19	-1.73	-1.33	-0.45	-1.8	-0.69	-1.13	-0.56	-1.2	-0.03	0.75	-0.81	0.73	0.55	-0.16	-0.14	-0.06	0.08	-0.15	-0.17	0.54	-0.47	0.14	0.89	-0.48	-0.29	0.59	-0.93	0.04
CHMP2A	0.82	0.65	0.27	0.73	-1.33	0.04	-0.05	-0.45	-0.15	0.4	0.1	0.34	-0.63	-0.76	-1.49	0.71	-0.48	-1.44	-0.38	-0.46	-1.36	0.72	-0.09	-0.23	0.04	-0.2	0.92	-1.1	-0.6	-1.7	-1.28
CLVS2	-0.41	0.23	-0.73	-0.66	-1.33	-0.46	-0.91	-0.84	-0.41	0.3	0.39	-0.71	1.34	0.68	-0.47	0.89	-1.52	-2.6	-1.08	-0.72	-0.97	-0.85	-1.51	-0.26	-1	-0.42	0.28	0.56	0.16	-0.45	-0.22
CXCL5	0.19	0.6	0.91	0.68	-1.33	-0.43	0.71	0.08	0.26	0.44	0.33	0.28	1.51	-0.45	0.35	0.32	-0.27	-0.94	-0.26	-0.12	-0.29	-0.56	-0.12	-0.07	-0.41	-0.33	-1.27	-0.68	-0.17	-0.71	0.19
ETNK1	-1.05	-0.85	-0.94	-1.19	-1.33	-0.03	-1.99	-1.22	-0.79	0.46	-0.15	0.55	0.56	0.69	0.04	-0.87	-0.19	-0.88	-1.06	-0.9	-0.09	-1.48	-0.47	-0.54	0.04	-0.43	-0.74	-0.36	0.88	-0.07	1.04
FAM13C	-0.77	-0.79	-1.03	-1.41	-1.33	0.09	0.92	0.89	0.4	1.29	-1.24	-0.61	-0.91	0.47	0.81	0.64	-0.78	-1.47	-0.05	0.4	0.02	2.04	0.08	-0.34	-0.57	-1.55	-1.08	0.15	-0.26	-0.26	-1.34
FAM171B	-1.1	-1.07	-1.08	-2.67	-1.33	-0.55	0.92	-0.06	-0.02	0.97	-0.28	0.27	0.64	1.01	-0.82	-0.26	0.74	0	-0.68	-0.37	-0.6	1	-0.45	-0.84	-1.5	-0.74	-1.38	-1.6	-0.4	0.65	0.94
FAM26E	-1.01	0.04	-0.39	-1.75	-1.33	2.04	1.97	1.66	1.45	1.43	-0.06	0.82	-1.47	0.8	0.96	-0.15	0.4	-0.73	-0.04	0.5	0.19	1.28	0.81	0.61	0.3	0.67	2.01	-0.57	-0.1	0.6	-0.18
FOXB2	0.04	-0.59	-0.06	0.84	-1.33	0.57	1.15	1.45	0.73	-0.03	0.36	2.09	-1.11	-0.48	1.43	0.51	-0.51	-0.32	-1.34	0.33	-0.58	1.74	0.11	-0.39	-0.31	0.67	0.69	0.68	-0.03	0.28	0.17
IFIH1	0.56	-0.4	0.27	0.3	-1.33	0.84	-0.8	-0.63	-0.85	-0.3	0.48	0.6	-0.52	0.09	-0.24	-0.15	0.35	-0.67	-0.15	-1.13	-1.82	0.64	0.6	0.21	-0.21	0.01	0.55	-0.84	-0.37	-0.82	-0.06
IL20RA	-0.16	-0.22	-0.12	-0.66	-1.33	1.15	-0.67	-0.32	0.09	0.43	-0.62	-0.27	0.68	0.91	0.05	1.47	-1.64	-1.34	-0.61	0.55	0.32	1.3	0.16	0.59	1.2	-0.08	1.67	-0.02	-0.64	-0.89	-1.07
LINS	-0.96	-0.85	-0.95	0.04	-1.33	0.38	0.63	0.4	0.57	0.34	-0.95	-2.14	1.84	0.02	-1.54	0.25	-0.64	-0.88	0.38	0.4	-0.35	0.73	0.61	0.86	-0.14	0.08	0.48	-0.97	-0.24	4.46	0.18
LRR1	-0.18	-0.13	-0.21	-1.64	-1.33	0.36	0.39	1.23	0.59	-0.28	-1.49	-0.38	0.39	0.68	-0.45	0.78	-3.05	-2.06	-0.1	0.55	1.31	0.26	1.46	-1.04	-0.04	1.23	-0.56	1.09	-0.16	-1.19	0.07
LRRC4	0.35	0.64	0.7	0.44	-1.33	-0.04	0.11	0.03	0.24	-0.19	-2.31	-0.91	0.68	0.3	1.29	-1.9	0.91	0.17	1.22	0.56	0.79	-0.13	0.24	0.68	1.07	0.67	-0.16	0.17	-0.12	0.39	0.05
MAP7	1.01	-1.65	0.66	-1.12	-1.33	1.17	0.82	1.49	-0.06	1.27	-0.32	0.08	0.55	-0.72	0.25	0.55	1.3	0.97	0.66	0.38	-0.14	-0.02	-0.83	-0.03	-0.64	-0.26	-0.13	0.62	-1.01	-0.13	-1.09
NKX2-1	-2.26	-1.04	-0.14	-1.58	-1.33	-0.15	1.76	0.67	-0.04	1.34	1.16	1.21	-0.19	0.2	0.2	0.2	1.22	2.19	1.12	0.96	1.36	0.31	0.77	-0.57	0.46	1.17	0.12	-1.52	-0.28	-0.72	-1.8
NSUN2	-0.35	-1.9	-1.11	0.45	-1.33	0.07	0.46	-0.55	1.03	-0.18	-0.35	-1.09	0.52	-0.06	-0.75	2.09	0.12	1.25	0.45	-0.76	1.18	0.08	-0.22	-0.92	0.43	0.71	-0.75	0.93	0.81	-0.24	0.99
ORC3	0.38	0.81	-1.92	-0.32	-1.33	1.07	0.38	0.84	0.73	-0.68	1.33	-0.09	-0.29	0.34	-1.34	-1.77	-1.29	-0.13	2.77	1.12	1.11	-0.19	-2.28	0.32	-1.47	-1.56	-2.37	-2.3	-1.25	-0.64	0.9
PAWR	-0.61	-1.93	-0.47	-0.25	-1.33	-2.73	-0.63	-1.04	-1.4	-4.21	0.69	-0.18	-1.24	-0.5	-1.19	-1.4	1.58	-1.57	-2.22	-1.18	-1.48	-3.58	-4.39	-1.37	-0.93	-4.05	-1.6	-3.54	0.98	-2.49	1.02
PCGF3	0.34	0.44	0.62	1.51	-1.33	0.89	-1.27	-1.28	-0.11	0.12	0.25	-0.12	-1.53	-1.15	-0.37	-0.37	-0.36	-0.21	-0.68	0.73	-0.04	-0.71	-0.56	-0.76	1.11	0.72	1.61	-0.17	-0.56	-1.18	-1.59
PLSCR5	0.27	-1.24	-0.47	-0.63	-1.33	-1.2	-1.7	-1.61	-1.55	-1.6	0.76	0.13	-0.35	1.59	0.5	-1.84	1.62	-0.23	0.35	0.63	0.85	1.34	0.04	0.66	0.6	0.71	0.6	0.71	-1.42	-1.61	-0.53
PTK2	0.08	-0.58	-0.37	-0.03	-1.33	0.12	0.06	-1.06	-0.64	0.2	-0.38	-0.41	0.72	-0.28	0.28	0.06	1.01	1.8	1.12	1.66	2.09	-0.93	0.62	4.96	0.35	0.85	1.18	0.35	0.27	0.57	-0.39
SHC1	0.15	0.07	0.23	0.44	-1.33	1.22	0.55	1.95	1.01	1.23	-0.56	-1.67	0.3	0.07	-0.37	1.5	-1.4	-0.02	0.28	0.18	0.21	1.48	0.72	0.42	0.34	0.1	-0.91	-0.23	-0.86	-0.01	0.5
SMAP1	-0.79	1.31	-0.73	-1.39	-1.33	-1.39	-0.85	-1.6	-1.09	-0.33	0.26	-0.04	-0.28	0.11	-0.36	1.29	0.09	-0.17	-0.75	-0.48	0.03	0.03	0.71	0.96	-0.54	0.08	0.28	1.88	-1.63	-0.4	0.8
TCF3	-0.46	-0.2	-1.53	-0.65	-1.33	0.04	0.4	-0.49	0.13	0.76	0.33	0.76	1.12	0.7	0.33	0.9	0.18	-0.29	-0.93	-0.66	-0.44	-0.75	0.99	0.43	0	-0.45	0.06	0.84	0	0.03	-0.12
TRIM47	-0.47	-1.55	-0.02	-0.92	-1.33	0.2	-0.06	0.86	0.42	-0.55	0.85	1.32	0.57	0.97	-0.13	0.41	1.09	0.6	0.19	0.17	0.86	-1.46	-0.71	-0.86	-0.05	-0.95	-0.49	0.04	1.14	0.15	0.44
VRTN	-0.61	0.22	0.86	1.22	-1.33	1.58	0.89	2.43	1.95	2.18	-0.68	-0.04	0.34	0.28	1.03	0.14	0.8	-0.19	-0.17	0.37	0.65	1.82	1.42	1.25	1.49	0.32	1.46	-0.75	-0.42	-0.71	0.09
ZFAT	-1.18	-1.75	-2.26	-1.91	-1.33	-0.48	-0.68	-0.74	-0.35	-0.53	-1.06	0.13	0.25	-3.36	-4.89	-0.39	0.88	0.92	-1.07	-0.83	0.06	-0.27	-0.06	-3.37	-3.02	-2.17	0.95	-2.07	0.9	-1.15	0.15
ACTL7B	-0.6	0.79	1.5	0.66	-1.32	1.31	2.14	1.75	1.01	1.38	-0.13	-0.48	-0.27	1.18	0.95	1.76	-0.06	-0.46	0.14	0.3	1.11	-0.24	0.24	0.34	1.37	0.02	0.3	-1.14	1.41	0.37	0.42
BHLHB9	-1.18	-1.56	-0.06	-1	-1.32	0.99	1.05	1.97	1.26	0.72	-0.01	-1.58	-0.19	-0.8	0.49	-0.29	2.09	1.51	0.44	-0.67	-0.7	-1.73	-0.18	0.08	-0.46	1.02	0.42	0.91	-0.55	-1.07	0.11
BOD1	0.42	0.31	-0.64	0.17	-1.32	-1.13	-0.14	0.6	-0.52	0.01	NA	NA	NA	NA	NA	-0.46	NA	NA	NA	NA	NA	0.43	0.2	0.46	-0.94	-0.54	-1	2.27	-0.3	0.88	-0.95
CD74	-0.86	0.45	-1.19	-0.93	-1.32	-0.82	0.09	-0.71	-0.71	-0.78	0.28	1.37	-0.3	0.5	1.29	-0.5	0.71	0.41	-1.25	0.07	0.12	-0.18	0.33	-0.86	0.08	-0.16	-1.06	0.11	-0.2	0.38	0.55
CDKL3	0.95	-1.09	0.44	0.58	-1.32	1.32	-0.34	0.72	0.57	0.35	1.73	3.16	-0.06	-0.16	0.53	-0.27	-0.64	0.71	-0.39	-0.04	0.55	-0.75	1.36	-0.06	-0.1	-0.14	0.43	1.03	1.11	1.27	1.58
COL23A1	-1.22	0.21	0.07	-0.56	-1.32	1.66	2.25	2.34	0.55	1.5	-0.01	-0.85	0.57	0.91	0.37	0.45	-0.42	0.73	-0.09	0.54	0.92	0.42	-0.45	0.69	-0.1	0.79	-0.76	-0.11	-0.15	0.87	-0.82
DNAH7	-1.29	-1.02	-0.31	-0.79	-1.32	-0.41	-0.41	-0.61	-0.8	0.27	0.87	0.11	0.06	-0.76	-0.88	0.6	-0.7	-0.64	-0.38	-2.04	-1.11	1.23	0.42	-0.06	-0.97	-0.86	-0.42	-0.38	-0.07	-0.5	0.61
EMC3	-0.09	-0.06	-0.78	0.48	-1.32	-2.39	-0.49	-2.51	-1.03	-1.01	-0.33	-0.48	-0.1	-1.62	0.28	0.15	0.83	3.32	0.36	-0.22	-0.5	-0.4	-0.84	-1.26	-1.13	-0.48	-1.22	-0.06	0.11	2.18	1.08
FAM26F	0.35	-0.17	1.04	1.04	-1.32	0.23	-0.71	-1.11	-0.4	-1.71	0.45	0.86	-0.3	0.19	1.13	0.23	-0.18	-0.78	-0.67	-0.13	-0.83	-0.27	-1.44	0.03	-0.14	0.32	0.23	-0.01	0.34	-0.95	0.56
GPR135	-0.19	-0.06	-1	1.09	-1.32	0.01	1.73	-0.37	0.33	-0.23	-1.47	-0.14	-0.14	0.59	0.53	0.68	0.55	0.55	0.02	-0.41	1.32	-0.59	0.62	-0.06	-0.61	-0.83	-0.92	-1.37	0.3	0.14	-0.14
HNRNPH1	-2.5	-0.33	-2.68	-1.31	-1.32	-0.59	1.08	-1.44	1.22	-0.91	-1.66	-1.07	0.92	-1.72	-1.25	-0.7	-0.17	0.69	1.24	1.1	1.48	0.88	-0.51	-0.83	-1.91	-2.38	-0.59	0.98	-0.01	-1.3	-0.59
HRK	-1.75	-1.48	-0.5	-0.42	-1.32	1.88	0.84	1.24	1.69	1.25	0.67	1.76	0.38	1.26	0.38	0.48	-0.34	0	-0.58	0.16	-0.4	-0.38	-0.07	-0.02	-0.25	0.17	0.05	0.98	1.49	0.93	0.88
JUP	0.46	0.6	0.29	-0.04	-1.32	1.52	1.05	-0.03	1.38	0.89	-1.17	-2.28	0.04	0.93	-1.34	1.28	-0.33	-1.38	-0.03	0.45	0.53	-0.53	0.16	-0.12	0.26	1.27	-0.25	0.35	-0.3	-0.04	-1.96
MOGAT2	-0.62	-1.14	0.88	0.5	-1.32	-1.47	-0.75	-0.28	-0.26	-0.13	0.25	0.4	0.57	-0.79	-0.11	1.96	0.91	1	0.38	0.77	0.93	0.05	1.69	0.42	1.42	0.26	1.45	0.85	0.4	-0.11	0.65
NCAPD2	-0.98	-2.28	-0.48	-0.8	-1.32	-0.34	-0.57	-0.69	-0.55	0.01	1.27	0.74	0.44	0.64	-0.44	-0.94	0.47	-0.6	1.82	2.3	1.72	0.42	-1.33	0.3	-0.6	-0.51	0.47	1.13	-0.3	0.36	-0.29
OSBPL10	-0.02	-0.53	0.17	-0.83	-1.32	0.36	2.01	1.06	0.44	0.51	-0.19	-0.88	0.57	0.02	0.99	0.85	0.64	0.35	-0.1	0.53	1.03	-0.62	0.84	0.21	0.63	0.69	-0.15	0.22	-0.03	-2.33	-0.47
PPP1R11	-1.27	-0.97	-1.35	0.74	-1.32	1.08	1.78	1.62	0.87	0.66	-0.67	-0.08	0.31	-0.4	-0.81	1.03	0.76	-0.55	0.75	0.64	0.68	1.38	0.75	-0.02	1.23	0.76	0.68	-1.35	-0.12	-0.2	-0.1
PTPN7	0.3	0.07	0.22	0.09	-1.32	0.87	1.29	1.13	1.06	1.04	-0.22	-1.42	0.95	-0.29	-1.38	0.12	0.84	1.19	-0.17	0.53	1.44	0.09	-0.56	-0.12	0.36	-0.86	-0.63	-0.99	0.14	-0.52	0.46
RAB7L1	0	-0.24	0.65	-1.57	-1.32	0.44	-0.43	-0.46	-1.41	-0.23	0.32	0.27	-0.31	0.19	-0.67	0.11	0.6	0	0.46	0.45	0.43	1.84	1.13	-0.22	-0.22	0.52	0.23	-0.41	0.46	0.85	0.47
RBM4	-1.37	-1.51	-1.28	0.28	-1.32	0.71	1.22	1.09	0.66	0.39	-1	-1.19	-1.9	0.38	-0.99	1.24	-0.24	-0.94	-0.25	0.79	1.11	-0.87	-0.05	0.41	2.83	1.11	0.14	-1.03	-1.46	-0.07	-1.24
RCOR3	0.02	-0.25	-0.26	-0.25	-1.32	-0.13	-1.54	-1.01	-0.89	-0.09	-2.23	-1.97	-1.32	0.06	1.24	-0.89	-0.75	-0.86	0.62	0.14	-0.04	-1.47	0.37	-0.5	-0.12	-0.54	1.85	0.26	-1.2	0.12	-0.96
RRAS	-0.46	-1.62	0.09	-1.28	-1.32	0.4	1.75	0.71	1.22	1.67	1.42	1.4	1.11	0.74	0.68	0.56	-0.84	0.34	-0.22	-0.02	0.83	0.66	-0.15	0.2	-0.04	0.71	0.04	-0.89	-0.8	-0.11	0.84
SPINK7	-1	-1.43	-0.69	-1.08	-1.32	-0.62	-2.6	-1.31	-0.67	-1.56	0.43	0.95	0.58	-1.31	-0.46	0.03	-0.81	0.88	-0.77	-0.34	0.15	0.77	1.48	0.04	0.05	0.38	1.63	-0.21	-0.53	0.21	-0.77
SPTAN1	0.38	-0.54	-0.91	-0.45	-1.32	0.24	-0.58	-0.68	-0.31	-0.1	-0.75	-0.33	-0.54	0.19	1.55	-1.93	0.49	-0.88	-1.4	-0.82	-0.79	1.02	1.63	-2.28	0.21	-1.19	-0.87	0.78	-0.67	0.03	0.33
THPO	0.13	0.04	-0.04	-0.86	-1.32	-1.12	-1.73	0.45	0.4	-0.36	-0.12	0.29	-0.79	0.68	-0.01	0.38	-0.22	-0.4	-1	-0.03	-0.02	-2.54	0.76	0.21	0.57	0	0	0.08	0.13	-0.06	0.48
TSPAN15	-0.22	-0.94	-0.92	-0.62	-1.32	-1.46	-1.55	-1.4	-2.1	-0.32	-0.07	0.07	1.2	-0.72	0.02	-1.05	-0.09	-0.31	-0.14	0.94	0.26	-0.59	-0.05	0.67	0.86	-1.54	0.11	-0.36	0.08	2.4	0.11
USP3	0.74	0.27	0.67	0.44	-1.32	0.26	-1.92	-1.75	-1.12	-0.79	-0.67	-0.48	-0.15	0.24	1.01	-0.03	0.36	-0.42	-0.17	-0.51	0.15	0.05	-1.2	0.13	-1.26	-0.18	0.15	-0.22	-0.74	-0.27	-0.81
VPS41	-0.8	-0.76	-1.38	-1.59	-1.32	-2.06	0.37	-2.81	0.29	-4.38	-0.07	0.09	0.91	1.45	2.26	-0.48	0.68	-0.41	-2.15	-1.13	-2.58	-1.32	0.25	1.52	-2.3	-2.13	-2.45	-1.68	0.68	-2.39	1.7
APP	-1.02	-0.56	-0.95	-0.8	-1.31	0.65	-0.37	0.06	-0.69	0.61	0.19	0.27	-0.11	0.45	0.84	0.78	-0.65	-0.86	-1.41	-0.23	-0.04	-1.35	-0.23	0.52	-0.28	0.24	1.66	-0.44	0.28	-0.63	-0.52
ATP2C1	-1.09	-1.44	-1.36	-0.91	-1.31	1.94	0.35	0	1.74	-0.57	0.09	0.77	1.63	-0.34	-0.46	-0.66	-0.1	-0.59	0.67	-0.29	0.92	0.41	2.26	1.32	1.01	0.43	-0.98	0.95	-1.73	-0.71	-3.86
BTBD6	-1.52	-1.03	-1.93	-0.98	-1.31	-0.49	-0.91	-0.3	-0.88	0.36	0.15	0.74	-0.31	0.37	-0.3	1.55	-0.27	-0.31	-1.58	-0.31	-0.03	-0.76	0.72	0.42	-0.64	0.85	1.22	0.05	0.24	-0.55	-0.45
CDH16	-0.34	-0.87	-0.38	-0.24	-1.31	0.25	-0.55	0.28	-0.45	-1.47	-0.4	-0.3	0.41	1.47	-0.06	-0.7	0.56	0.11	0.39	0.35	0.13	-1.74	0.15	0.05	-0.9	0.64	-1.48	0.87	-1.25	-0.7	0.51
DNASE2B	-0.88	-2.46	-1.14	-1.41	-1.31	-0.16	0.01	0.55	-0.19	0.72	0.68	0	-0.5	0.21	1.19	0.66	-0.06	0.9	0.25	-0.48	1.12	-1.04	0.41	0.08	-0.65	-1.35	-1.01	1.08	-0.34	0.97	-0.01
DRAP1	-1.35	-1.66	0.21	0.54	-1.31	0.24	-0.91	-1.38	-0.67	-3.29	-0.51	0.67	-1.07	-4.7	-8.71	1.04	-2.81	-2.83	3.51	2.29	0.7	-1.54	-5.56	-3.15	-2.77	-4.45	-4.85	-6.25	-1.64	-2.01	-2.38
DSE	-0.6	-0.6	1.13	-0.82	-1.31	1.41	0.61	1.24	0.36	0.4	-1.77	-0.17	0	-0.84	-0.47	0.76	0.88	-0.05	1	-0.17	-0.15	-0.17	0.64	0.18	-0.11	-0.61	0.17	0.31	-0.19	-0.44	-0.95
GDF5OS	-0.28	0.5	-0.44	-0.56	-1.31	1.2	0.4	1.08	0.67	0.44	-0.08	-0.51	-0.89	-0.76	-0.42	1.18	-0.56	-0.57	-1.25	-1.42	-0.55	0.51	1.21	-0.24	-0.03	-0.25	-0.38	-0.05	-0.93	0.45	-2.23
NDUFAF6	-0.83	-0.63	-0.82	-0.73	-1.31	-1.09	0.15	0.97	-1.29	0.39	0.97	0.97	1.59	0.52	-0.02	0.62	-0.68	-0.18	0.35	0.01	0.41	0.12	0.21	0.44	1.02	1.7	1.8	1.16	-1.68	-1.84	-0.08
NR4A2	0.52	0.73	-0.61	0.59	-1.31	-0.59	-0.45	-0.29	-1.5	-1.73	-0.13	-0.1	-0.4	-0.1	0.02	-2.43	0.05	0.17	-0.36	0.1	0.35	-1.74	0.26	0.26	0.5	0.63	0.65	0.21	-0.62	-0.18	-0.22
OPN3	-1.35	-0.11	-0.06	-1.85	-1.31	-0.3	0.38	0.65	-0.16	-0.22	0.21	0.76	0.64	0.97	0.97	-0.1	-0.52	-1.09	-1.34	-0.71	-0.38	1.43	-0.12	-0.19	0.01	-0.39	-0.66	-0.12	0.17	0.69	-1.07
OR5I1	-0.28	-0.41	-0.38	-0.61	-1.31	-0.6	0.16	0.19	-0.4	0.13	-0.56	-1.54	-0.68	-0.87	0.01	0.83	-0.71	-0.58	0.03	-2.05	-1.72	-0.65	0.34	0.13	-0.34	-0.01	0.05	0.13	-1.62	0.46	-0.54
PRRX1	-1.32	-0.61	-0.72	-1.77	-1.31	0.8	0.06	1.47	1.35	0.54	1.4	0.83	1.57	0.15	-0.34	0.31	0.07	1.38	0.51	-0.16	0.17	-0.21	0.53	0.65	-0.42	0.59	-0.58	-1.41	1.49	0.38	1.02
PTPN12	-1.53	-0.96	0.15	-2.56	-1.31	-6.33	-0.69	0.07	-1.55	1.09	-1.16	-0.48	-1.03	-0.93	0.5	-1.25	-0.88	-2.4	-0.14	-0.61	-0.47	0.33	0.14	-1.28	-0.44	-1.92	-1.8	-0.53	-1.13	-1.73	-1.12
SCGB1A1	-0.64	-0.67	0.1	-0.3	-1.31	-0.99	-0.16	-0.95	-0.53	-0.14	0.07	0.42	-0.53	0.22	1.04	0.2	-0.77	-0.56	-0.36	-0.19	-0.44	0.73	-0.03	-0.63	0.05	-0.69	-0.14	0.06	-0.13	0.1	0.33
SLC6A11	0.51	0.34	0.03	0.43	-1.31	1.13	1.62	0.62	0.58	1.74	-0.02	1.12	-0.87	0.91	0.36	1.34	-0.29	-1.37	-0.7	-0.41	-0.68	0.98	0.68	-0.06	-1.07	0.46	-0.02	-0.99	1.3	0.43	1.3
SLCO4A1	1.05	-0.33	-0.14	0.27	-1.31	-0.09	-0.7	0.06	-0.16	-0.64	1.17	0.84	0.5	-0.38	0.74	0.65	0.93	-0.93	-0.75	-0.52	-0.24	-0.24	-1.73	-0.82	-0.15	-1.18	-1.2	0.51	0.8	0.07	1.02
SYT12	-1.06	0.68	-0.14	-0.14	-1.31	0.53	-0.29	0.78	-0.16	-0.37	0.2	1.17	-0.45	0.72	-0.21	-1.09	1.66	0.34	1.07	0.36	0.05	0.27	0.66	-0.07	0.82	0.77	-0.21	-0.72	2.01	1.18	0.18
TMEM106B	-0.01	-0.96	-1.9	-0.29	-1.31	-1.62	-0.64	-1.1	-0.86	-1.22	-0.72	-1.47	-1.14	0.19	-0.66	-0.75	-0.61	0.22	-0.18	-0.77	-0.17	-0.05	0.12	0.4	-0.06	-0.75	-0.83	0.83	-0.01	1.3	-0.69
TTC12	-0.21	0.11	-1.36	-1.35	-1.31	-0.2	-0.91	-0.27	-0.21	0.49	-0.3	-0.18	-1.22	1.11	0.18	-0.05	1.17	0.88	-1.32	0.13	-0.45	-2.03	0.39	0.15	-0.03	0.5	-0.15	0.33	-0.25	-0.15	-0.38
TXNDC17	-1.98	-3.3	-0.84	-0.45	-1.31	1.6	0.2	-6.21	0.29	-4.61	1.15	-0.32	-2.38	-5.52	-11.52	1.16	-0.73	1.74	-2.1	0.91	-1.83	-2.85	-5.89	-3.12	-16.71	-2.41	-6.2	-3.61	-1.99	-3.8	0.27
ZNF207	1.42	1.08	-0.84	0.12	-1.31	-0.72	-2.96	-2.68	-3.51	-2.98	-1.18	-1.82	-1.45	-1.02	0.29	-2.62	0.01	-0.28	0.76	1.53	0.98	0.01	-0.12	0.12	1.03	-0.27	0.43	-0.06	-0.43	1.02	1.33
ARID1A	-0.07	1.08	-2.07	-2.06	-1.3	-2.49	0.08	1.85	-2.78	0.14	-1.44	0.79	-0.72	0.75	0.81	-0.71	-0.41	-1.92	-1.05	0.15	-0.84	0.65	2.44	-1.65	3.09	0.58	0.05	1.47	-1.16	0.25	-1.87
ARSH	-0.43	-0.33	-1.44	-0.37	-1.3	-0.87	-0.04	-1.43	-0.04	-0.07	-0.02	1.89	0.84	0.32	0.78	0.39	0.5	1.05	-0.75	0.24	-0.23	0.78	0.81	-0.39	0.26	0.61	-0.03	0.07	1.68	1.12	1.09
ATP11A	-1.36	0.53	-1.51	-2.45	-1.3	0.46	1.21	-0.3	1.1	0.07	-0.96	-0.03	1.35	0.03	0.02	-0.64	0.57	0.39	-0.3	0.23	0.34	0.51	0.55	-0.57	0.09	0.31	-0.4	-0.94	0.38	-0.31	-0.3
BSND	-0.24	0.3	-0.13	0.22	-1.3	-2.03	-0.34	0	-1.54	-0.94	-0.28	0.18	-0.62	0.33	-0.27	1.44	-1.92	-2.54	-0.95	-1.57	-1.56	-0.2	0.37	0.06	-0.01	0.83	0.26	0.6	-0.52	0.81	0.04
CRTC3	-0.51	-0.86	-1.29	-1.48	-1.3	0.79	0.64	0.9	0.89	0.38	-0.04	0.74	0.66	0.27	-0.71	-2.52	0.42	0.64	0.52	-0.14	0.24	0.69	-0.09	-0.48	0.57	0.38	0.38	0.43	0.5	-0.05	-1.54
CTDSP2	-0.25	-0.25	-0.06	-0.5	-1.3	-0.3	0.34	0.17	-0.48	-0.25	-0.07	-0.61	0.77	1.03	0.74	0.21	-0.1	0.8	-0.12	-0.25	-0.9	0.95	0.23	-0.29	-0.09	0.44	0.9	0.74	0.82	0.06	0.3
DIO2	0.44	-1.28	0.15	-0.18	-1.3	0.03	0.57	0.41	-0.06	0.65	-1.17	-1.19	-0.47	-0.06	-0.56	0.99	1.62	1.44	0.49	0.38	1.19	0.91	0.3	-0.22	0.63	-0.16	-0.79	-0.3	0.23	-1.32	-1.55
DLL1	-1.64	-0.17	-1.59	-0.61	-1.3	1.31	1.98	1.76	1	1.25	-0.39	0.59	0.33	0.67	1.71	-0.84	0.01	1.4	1.12	0.25	0.08	-0.7	-1.26	-0.65	-0.09	-0.97	-0.05	0.23	1.23	0.95	0.73
DNAJC7	0.19	-0.06	-0.11	-1.27	-1.3	0.17	-0.85	0.37	0.57	-0.82	0.36	0.21	0.02	-0.16	-0.74	-0.91	0.09	0.57	0.08	-0.13	-0.6	-1.42	1.45	1.29	-0.23	-0.02	-0.03	0.4	0.32	0.06	0.62
DPM1	-0.61	-1.04	-0.71	-1.04	-1.3	0.66	0.11	-2.32	-0.32	-1.52	-0.07	0.62	2.01	0.35	-0.33	0.31	1.16	1.61	1.26	0.56	0.21	-1.2	-0.97	2.94	-1.5	0.5	0.86	-1.99	-0.72	-0.19	-1.18
EMID1	-0.73	0.25	0.04	0.57	-1.3	0.92	-0.19	0.27	0.96	-0.15	0.11	0.44	0.76	0.27	0.24	1.88	0.62	1.58	0.32	0.78	0.67	-0.63	0.66	0.34	1.11	0.64	0.66	-0.35	0.67	0.15	0.71
ESYT2	0.34	-0.39	-1.49	-0.2	-1.3	-0.32	-1.09	-0.21	-0.45	0.6	0.64	-0.33	-0.21	-0.05	-0.84	-1.07	0.04	0.25	-0.39	-0.71	-0.64	0.39	0.86	-0.3	-0.22	0.87	1.47	0.56	-0.73	0.57	-0.5
EXD2	-0.54	-1.64	-0.47	-0.73	-1.3	1.18	-0.66	1.03	0.98	0.15	-0.29	0.2	0.98	-0.26	-0.48	-0.81	-0.59	-0.04	-0.67	-1.33	-1.23	0.72	0.52	-0.02	-0.41	0.73	0.77	-1.02	-0.89	-0.04	0.58
GNPAT	-0.43	-0.56	-1.62	-1.02	-1.3	0.81	-0.15	0.37	0.46	-0.19	0.12	2.44	-0.37	-1.17	1.24	0.07	-0.66	-0.01	-0.34	-0.3	-1.02	0.26	-1.32	0.21	0.07	-0.74	0.29	-0.25	0.45	0.89	-0.02
HLA-G	0.18	-0.61	-0.56	-0.79	-1.3	0.64	0.48	0.75	1.15	0.78	-0.98	-0.07	-0.08	-0.03	0.42	1.48	-0.13	-0.19	0.16	0.16	-0.48	0.89	-0.15	0.66	0.42	0.03	0.78	1.55	-0.92	-0.35	0.65
IL17C	0.62	0.5	0.06	-0.26	-1.3	-0.64	-0.21	-0.56	0.8	-1.34	0.27	0.08	0.13	-0.51	-0.11	0.24	1.05	0.74	-0.09	-0.92	-0.5	1.11	0.75	0.08	-0.18	-0.06	0.61	0.15	-0.41	0.15	0.57
KIF25	-0.66	-1.67	-0.84	-1.58	-1.3	-0.21	0.12	-0.35	-0.85	0.44	0.94	1.09	0.59	0.24	0.7	-0.3	-1.11	-0.56	-0.11	0.36	0.62	-0.4	-1.51	-0.77	-0.26	0.14	-0.59	0.15	-0.4	-0.76	-0.15
OLFML3	-0.46	-0.42	-1.12	-1.46	-1.3	-0.56	-0.8	-0.3	-0.59	-0.58	1.44	-0.22	0.03	0.07	1.41	-0.6	-1.32	0.62	-0.06	0.55	1.81	-0.49	0.16	0.17	1.69	1.24	0.9	0.88	-0.74	-0.33	-1.06
PANK1	0.81	0.18	1.29	1.01	-1.3	-0.76	-0.7	-0.9	-0.65	0.49	0.82	1.08	0.8	-0.05	-0.7	1.04	0.11	1.01	0.68	-0.71	-1	0.17	-0.74	-0.01	-1.48	-0.44	-0.43	0.42	-0.05	-1.33	-0.68
PI15	0.57	-0.59	0.27	-0.12	-1.3	-1.17	0.15	0.35	0.05	-0.22	0.11	0.33	0.34	0.82	-0.04	-1.26	0.9	1.09	0.56	0.51	0.12	0.58	-0.4	0.95	0.48	0.37	-0.07	-1.64	0.05	1.34	0.49
PLCE1	-0.51	0.5	-0.46	0.05	-1.3	-1.39	-0.97	-1.39	-2.87	0.32	0.08	-0.53	0.84	0.07	0.69	-0.79	3	0.68	-0.66	-0.61	-1.2	-2.3	-0.96	2.5	-0.52	-1.14	0.19	-0.63	1.62	1.47	0.52
SKA1	-1.85	-1.75	-1.72	-0.56	-1.3	-1.95	0.05	-2.33	-1.72	-1.99	-1.22	-0.81	1.13	-2.18	-2.98	-0.76	-1.48	0.25	-0.5	-0.12	-1.5	-2.07	-3.57	-2.92	-1.9	-0.72	-1.79	-2.52	-1.69	-1.19	-1.45
SPI1	-1	-0.36	-1.27	0.44	-1.3	-0.82	-0.5	-0.82	0.18	0.03	1.48	0.4	-0.93	0.01	-0.57	-0.37	-0.29	0.78	0.36	0.77	0.54	-2.24	0	0.08	0.18	0.76	0.41	-0.19	1.46	0	1.22
SRY	0.47	0.07	0.31	-0.59	-1.3	-0.71	-1.02	-0.57	-1.84	-0.6	0.04	-0.69	-0.86	0.53	1.1	-0.74	-0.68	-0.95	-0.88	-0.46	-0.56	1	-0.18	0.04	-0.76	-1.44	-0.13	-0.95	-0.04	-0.18	-0.73
TMC3	-0.16	0.13	-1.34	-1.24	-1.3	-0.24	0.64	-0.62	0.11	-0.96	-1.64	-0.14	-0.39	0.14	-0.19	0.27	0.45	-0.6	-0.66	0.25	-0.51	-0.64	-0.54	-0.68	-0.58	-0.59	-0.72	0.17	1.02	1.07	0.79
TRIP12	-1.09	-1.55	-1.56	-0.07	-1.3	0.27	0.12	-1.71	0.46	-0.04	-0.34	-1.32	-2.96	-2.15	-1.46	-0.42	-0.79	-0.68	-1.83	-1.73	-0.77	-1.73	-1.16	-4.26	-2.61	-2.44	-3.52	-8.59	0.31	-3.16	-0.58
YIPF6	-0.77	-1.79	-2.14	-0.85	-1.3	-0.43	0.17	-0.11	-1.6	-0.14	-0.17	-1.99	-1.41	-1.08	0.35	0.59	1.33	0.64	0.87	-0.11	0.17	0.9	-0.99	0.38	0.08	1.09	-0.45	-0.47	-0.56	0.79	0.55
AS3MT	-0.55	-0.27	0.87	-0.65	-1.29	-0.09	-0.79	0.67	-0.19	1.03	-0.35	-0.26	-0.98	-0.16	-0.46	-1.94	-0.95	-0.73	-0.91	-0.59	-0.68	-0.12	0.2	0.55	0.18	-0.24	0.1	0.38	-0.05	0.68	-0.01
C10orf88	-1.3	-2.48	-1.22	-1.02	-1.29	-1.47	-0.59	-0.31	-0.67	-0.09	-0.23	0.1	0.91	-0.71	-0.37	0.06	2.13	1.26	0.76	0.9	0.74	0.38	-0.03	-0.4	0.78	0.41	0.95	-0.6	0.44	0.9	0.21
CNTN1	-0.4	-1.06	-0.94	-0.79	-1.29	-0.89	-0.23	0	-0.34	0.16	0.89	0.86	-1.56	-0.16	-0.17	1.72	1.65	0.46	0.54	1.06	0.25	1.21	0.73	0.8	0.2	1.11	0.86	-0.66	0.71	0.2	0.4
CTXN1	-0.35	-0.52	0.42	-0.31	-1.29	-0.68	0.76	0.76	0.32	-0.03	-1.44	0.84	-0.24	0.04	-0.21	-0.39	0.32	0.22	-0.73	-0.7	-0.59	-0.71	-0.3	-0.41	-1.49	0.49	0.86	-0.02	0.82	-0.91	0.27
DYRK3	0.44	-1.24	0.32	0.01	-1.29	0.07	0.31	-1.56	-0.55	-1.11	0.42	0.65	-1.25	-0.48	-0.75	-1.53	0.58	0.13	0.65	0.65	0.74	-1	0.11	1.06	1.36	0.18	-0.83	-0.34	-0.31	0.65	-0.18
ELF2	-0.86	-0.98	-1.38	-1.85	-1.29	-1.28	0.04	0.06	-1.45	-0.43	0.37	-0.28	0.06	1.05	0.14	-0.08	-0.18	-0.3	0.76	-0.77	-0.43	-0.11	0.35	2.09	0.06	0.94	-0.14	0.18	0.12	-0.67	-1.28
ENTPD8	-0.68	-0.67	-0.33	0.27	-1.29	0.01	-0.17	0.34	-0.87	0.7	-0.49	1.15	-0.19	0.91	-0.16	-0.13	-0.47	-0.18	-0.06	0.03	-0.08	0.59	1.8	0.1	1.53	0.77	1.37	-0.07	1.93	0.9	-0.78
FAM65A	-0.14	1.66	0.05	0.65	-1.29	-0.3	0.66	0.41	-0.48	1.22	-0.83	-1.36	1.02	-1.28	0.15	-0.61	-1.46	-1.7	-0.72	-0.33	-0.6	0.77	0.46	0.98	-0.08	1.72	0.77	-0.82	0.24	-1.19	0.41
FBXL2	0.57	-0.89	-0.23	0.01	-1.29	-0.57	-0.75	-1.22	-0.93	-1.34	0.49	0.76	1.73	1	0.95	0.41	0.46	1.07	0.89	0.52	0.04	0.16	0.63	0.28	0.73	0.11	1.21	-0.59	-0.42	-1.05	-1.15
GALM	-3.58	-0.27	-2.45	-3.23	-1.29	1.47	1.97	2.38	1.16	2.06	-0.64	-2.33	-0.68	-0.31	0.42	0.13	-0.21	-0.82	-0.37	0.49	0.39	0.79	-1.26	-0.67	-0.16	-0.19	-1.02	-1.15	1.81	0	0.68
GPR182	0.76	0.57	1.29	0.26	-1.29	1.54	1.05	1.08	0.21	0.51	0.19	0.95	1.05	-0.2	-0.58	1.05	-0.5	-2.3	-1	-0.57	-0.12	0.86	0.17	1.01	0.86	1.53	1.25	0.4	1.19	0.31	-0.22
GPR26	-0.6	-0.02	-1.03	-0.68	-1.29	1.28	2.07	1.25	0.82	1.21	0.55	2.69	0.01	-0.13	0.98	-0.21	0.13	0.04	-0.51	-0.82	-0.69	-0.77	0.84	-0.77	1.09	-0.08	1	0.93	0.7	1.42	0.14
KLHDC4	-1.18	-1.5	-0.98	-0.62	-1.29	-0.47	-0.38	0.16	0.81	-0.73	-0.52	-0.39	1.66	-0.75	1.01	-1.95	0.31	0.55	-0.17	-0.26	0.28	-0.86	-0.12	0.25	0.31	-0.12	0.44	1.56	1.56	0.66	0.76
LZTR1	0.59	-0.03	-0.36	-0.77	-1.29	-0.39	-0.05	0.05	0.37	-0.87	-0.23	1.72	-0.09	0.04	0.91	-0.09	-0.58	-0.11	-0.81	-0.57	0.97	-0.3	0.17	-0.85	0.46	1.07	0.38	-1.33	0.39	-0.37	-1.77
MAMLD1	-1.9	-0.01	-1.73	-2.49	-1.29	1.91	1.41	1.89	1.48	1.28	-0.38	-0.93	0.36	0.69	0.67	0.99	-0.17	-0.76	-0.01	-0.09	-0.27	-0.31	0.02	0.05	0.23	-0.14	-1.3	0.47	-0.59	0.1	-0.27
MTF2	-1.35	-1.45	-1.65	-0.81	-1.29	-0.93	-1.01	-0.16	-0.99	-0.93	0.7	-1.47	-1.03	-1.47	-1.11	-0.87	0.66	-0.71	0.56	0.68	0.99	-0.05	-0.17	-0.81	1.17	1.89	0.16	0.2	0.17	0.88	1.83
MYBL1	-0.78	-2.12	1.3	0.57	-1.29	3.02	1.01	0.87	7.99	-1.86	-0.39	-1.44	1.45	-1.52	-0.89	0.34	-0.39	0.72	-0.48	-0.9	-1.38	-0.81	1.16	-0.16	0.6	-1.65	-1.42	-0.32	-0.33	-0.47	-1.58
P2RY1	-0.41	-1.11	-0.91	-1.04	-1.29	-0.15	0.21	0.91	1.26	0.89	-0.53	-0.28	-0.55	-0.47	0.36	1.13	-0.86	0.43	-0.02	-0.39	-0.65	0.67	-0.58	0.05	-0.62	-0.77	-0.38	0.69	1.19	0.17	1.28
PCED1A	-0.07	-1.56	-0.89	-0.05	-1.29	0.05	-0.43	0.62	-0.29	0.12	-0.75	-0.79	0.65	0.5	0.11	-0.63	0.7	0.4	-0.36	0.07	-0.16	-0.08	1.45	0.16	0.67	0.39	0.78	-0.62	0.22	0.15	-0.61
PNMA3	-0.06	0.42	-0.09	-0.57	-1.29	-1.47	-0.68	-0.85	-0.65	-0.19	-0.01	-0.12	-0.98	0.4	0.83	-1.04	-0.96	0.43	0.22	-1.07	-1.24	0.15	-0.38	-0.53	-0.05	-0.21	0.76	-0.08	0.6	1.15	1.87
PRX	-0.6	-1.81	-1.64	-0.84	-1.29	2.41	2.13	1.63	1.73	0.82	0.8	2.07	-0.07	0.7	0.04	1.55	0.89	0.87	-1.07	0.28	0.41	1.45	0.07	0.33	-1.39	-0.56	-0.93	0.78	0.8	0.19	1.59
PTH2R	0.49	-0.61	0.03	-0.11	-1.29	-0.4	-0.95	-1.09	-0.14	-0.33	-0.87	-1.27	0.59	-0.76	0.16	-2.26	0.31	0.58	0.32	-1.55	-1.3	0.52	-0.25	0.13	-1.13	0.56	-0.39	0.02	1.14	1.94	2.03
RBFA	-0.09	-0.53	-1.37	-0.22	-1.29	0.21	0.39	-0.37	-0.07	0.55	1.05	0.16	0.35	-0.5	-0.08	0.67	2.63	0.59	0.77	-0.43	-1.09	-1.16	-0.03	-1.32	0.1	-0.46	0.01	0.89	0.14	1.25	1.08
RGS7	0.15	-0.33	-0.77	-0.98	-1.29	-2.06	-3.54	-2.41	-1.47	-1.62	-0.24	0.08	-0.35	-0.62	0.83	-1.02	0.14	0.47	-0.52	-0.76	-1.22	-0.66	1.31	-0.21	1.72	1.7	1.19	-0.99	2	0.99	2.24
RIT1	-0.5	-1.03	-0.97	-1.61	-1.29	0.04	-0.55	-0.77	-1.53	0.43	-0.53	0.12	-0.36	0.11	0.08	-0.39	1.38	-0.72	0.73	0.04	-1.1	-1.1	-0.31	0.22	0.55	0.94	0.81	0.3	0.16	0.1	1.35
RNF111	-0.46	-0.96	-2.96	0.18	-1.29	-3.93	-1.71	-1.37	-0.77	-1.41	-0.99	-1.9	0.33	0.59	0.11	-0.99	-1.38	-0.87	0.34	-0.42	-0.91	1.05	-1	3.24	-3.47	-0.46	0.17	-1.38	0.05	-2.32	-1.11
RNF185	-0.05	-0.34	-0.52	-1.13	-1.29	1.94	2.74	1.8	1.56	2.26	0.3	-0.54	-0.8	0.62	-0.88	-3.08	0.53	1.04	-0.02	-1.07	-1.01	1.26	1.01	-0.38	-0.57	0.41	-0.22	0.32	0.47	0.92	1.08
ROCK2	-0.03	-1.06	-1.87	0.02	-1.29	-4.06	-2.86	-2.47	-2.64	-4.63	1.59	-0.13	-1.47	-1.26	-1.45	-1.2	0.87	-1.33	-2.99	-1.61	-1.35	-1.92	-4.52	-2.01	-1.15	-4.15	-3.7	-3.29	0.93	-4.72	-0.16
RTN4RL1	1.15	1.51	0.15	1.55	-1.29	0.69	0.03	0.1	-0.26	-0.2	-0.43	0	-3.86	-0.42	-0.95	0.49	-0.77	0.19	-0.02	0.75	0.2	-0.86	-0.72	0.72	0.47	0.56	-0.64	0.31	0.64	-1.37	0.47
SEMG2	-0.02	-1.37	-0.26	-0.63	-1.29	-1.44	-1.21	-1.38	-1.79	-0.72	2.16	-0.49	-0.54	0.17	0.28	-1.18	-1.61	0.05	0.4	-0.34	0.1	0.68	-0.15	0.11	-0.79	-0.52	-1.61	-0.43	-0.72	-0.3	0.79
SLC7A4	-0.8	-0.04	1.49	0.4	-1.29	0.93	0.5	0.56	0.37	0.6	0.55	2.04	0.08	-0.03	0.32	-0.16	-0.71	-1.41	-0.07	-1.34	-1.58	-1.48	0.34	0.56	-1.66	-0.2	0	0.73	0.91	1.57	0.1
STIM1	-0.91	-0.63	-0.6	0.14	-1.29	-1.05	1.07	0.49	-0.89	-0.95	0.01	-0.14	-0.36	0.26	-0.04	0.27	1.53	0.59	0.2	0.33	-0.26	-0.25	-0.29	0.23	0.31	0.63	0.02	0.61	-1.42	-0.03	0.53
ATG4A	-1.06	-0.36	-1.28	-1.66	-1.28	-0.73	-1.74	-0.43	0.03	0.33	0.42	0.61	-0.74	0.68	-0.36	-0.77	0.43	-0.02	0.01	-1.15	-1.41	0.37	-0.29	-0.43	-0.42	-0.21	0.01	2.15	-0.84	-0.06	-1.21
C11orf48	-0.41	-0.97	0.66	0.63	-1.28	-0.7	0.2	0.59	-0.33	0.32	1.56	1.5	0.08	0.6	0.24	0.34	0.43	-0.14	0.16	-0.13	0.88	0.03	0.06	-0.12	0.71	-0.59	1.18	1.24	0.73	1.8	1.18
C17orf70	-8.21	-1.72	-0.98	-0.89	-1.28	0.02	-0.34	-5.83	-0.43	-2.45	-0.52	-0.13	-5.66	-23.84	-21.5	-0.37	-6.25	-0.54	-1.08	-0.74	-0.87	0.78	-0.81	-1.92	-21.43	-1.84	0.15	-4.3	-0.54	0.25	0.33
C5orf27	-1.78	0.62	-1.35	-1.63	-1.28	-1.27	0.34	-0.74	0.49	-0.13	-0.26	0.54	-0.46	-0.1	-0.52	0.35	0.26	-0.03	-0.45	0.48	0.43	-0.54	0.43	0.58	0.93	0.35	0.06	0.22	-0.39	-1.06	-1.53
CAPN14	-0.99	-0.51	-0.82	-1.75	-1.28	-0.69	0.35	-0.05	-1.13	0.75	0.99	0.27	0.93	0.94	-0.06	-0.28	-1.15	-0.15	0.82	0.21	0.32	-0.09	-0.06	-0.39	0.47	0.18	-0.87	-1.73	-0.02	-0.28	1.27
CDH19	-1.29	-0.81	-0.47	-1.22	-1.28	-0.9	-1.72	-2.12	-1.45	-0.93	-0.38	-1.33	-0.38	-0.94	-0.36	0.55	1.85	1.23	1.5	-0.15	-0.64	0.84	0.3	-0.5	-0.21	0.09	-0.46	-0.72	-0.17	0.38	-2.03
DCLRE1B	-0.49	-1.95	-1.03	0.25	-1.28	0.88	1.77	1.39	1.15	0.16	0.16	0.11	0.3	0.96	0.15	-0.19	0.8	0.79	2.4	2.87	1.81	1.17	1.01	-0.97	0.36	-0.58	0.24	0.56	0.36	-0.81	-2.16
DLX4	-0.1	0.5	-0.32	-0.39	-1.28	1.06	1.52	0.86	1.35	0.74	0.58	-0.65	-0.42	-0.68	0.32	0.68	-0.53	-1.35	-0.56	-1.23	-1.41	-1.3	0.23	0.06	-0.09	0.54	0.09	-0.06	1.04	0.86	-0.15
FBLIM1	-0.47	-0.32	-0.97	-0.98	-1.28	0.45	0.98	-0.3	-1.28	0.75	-1.01	-1.06	0.02	-0.17	0.25	0.26	0.87	0.37	-0.04	0.75	1.64	0.93	-0.67	0.31	0.66	1.31	-0.42	-0.49	0.25	-0.27	-0.55
FMN1	-1.54	-1.08	-1.2	-0.49	-1.28	-1.05	-0.53	-0.09	-0.34	-0.58	-1.64	-1.38	-1.39	-0.53	-0.73	-1.47	0.37	-0.23	0.43	-1.64	-1.85	0.07	-1.08	-0.26	-2.26	-0.48	-0.35	0.2	-1.11	-1.57	0.22
GIGYF2	-1.44	-2.25	-2.08	-1.39	-1.28	-2.94	-2.73	-3.35	-1.8	-0.6	-0.63	0.12	0.11	-2.13	-3.6	-0.62	-2.55	-0.65	-0.15	-1.36	-1.16	0.26	-1.43	-5.15	-3.42	-2.16	-2.9	-2.53	-1.56	-2.01	-2.38
GPR35	-2.22	-0.64	0.21	-1.46	-1.28	-0.43	1.08	0.03	1.07	-0.14	0.34	0.43	-0.96	0.48	-0.4	0.67	0.08	-0.46	-0.48	-0.13	0.11	1.6	0.93	0.18	0.94	0.41	0.08	0.07	2.13	1.51	1.42
GRXCR2	0.12	-1.8	0.09	0.23	-1.28	0.57	0.79	0.47	1.03	0.7	1.53	0.05	0.1	-0.01	0.02	-0.07	1	1.76	0.75	-0.03	1.37	0.56	1.16	0.05	0.86	0.92	1.35	0.82	-0.67	-0.12	-1.06
HAS1	0.49	0.29	-0.57	0.93	-1.28	-0.14	1.26	-0.02	-0.87	-0.33	0.73	2.41	1.16	0.49	-0.6	0.31	0.75	-0.25	-0.52	0.23	0.67	1.01	-0.05	-0.31	0.76	0.61	-0.03	-0.74	2.07	1.2	-0.36
HOXD11	-2.41	0.32	-0.94	-1.71	-1.28	-0.39	0.52	0.91	0.4	-0.33	-0.06	1.2	-1.11	0.09	-0.68	-1.43	-1.23	-1.16	-1.25	-0.94	-0.65	0.34	-0.1	-0.09	0.14	0.07	0.23	-0.66	1.14	-0.03	-0.96
HSD3B1	-0.71	0.22	-0.63	-0.03	-1.28	-0.52	-0.21	0.02	0.08	0.19	1.73	1.44	-1.13	0.2	0.48	-0.99	0.88	0.33	-0.16	-1	-0.91	-0.12	0.73	-0.28	0.56	0.07	0.46	-0.14	-0.05	0.52	-1.49
MT3	0.07	-1.27	-1.68	-0.88	-1.28	-0.85	0.29	-1.24	-0.3	-2.02	0.1	0.91	-0.18	-0.27	1.71	-1.42	-0.73	-1.39	-0.38	-1.39	-1.79	-1.84	-1.44	-0.04	-0.81	-0.12	-0.2	2.09	0.74	0.97	1.25
NDRG2	-0.21	-0.05	0.42	-0.57	-1.28	-0.09	0.41	0.13	-0.6	0.72	0.15	0.94	-0.79	-0.39	0.11	0.44	0.5	-0.57	0.14	-0.33	-0.36	-0.15	-0.33	-0.61	-0.78	0.07	-1.21	1.32	-0.28	-0.37	-0.72
NFE2	-0.3	-0.51	-0.79	-1.53	-1.28	-1.08	-1.9	0.11	-0.5	-0.39	-0.57	-0.74	-0.13	-0.49	-0.58	-0.81	-0.05	0.98	0.47	0.23	0.06	-0.83	0.62	0.09	-0.35	0.8	0.03	0.88	-0.25	0.47	0.95
PCDH20	-0.05	0.62	0.07	-0.25	-1.28	-1.05	-0.41	0.61	0.28	-0.68	-0.7	-1.94	-0.44	0.24	-0.03	0.91	-1.3	-0.55	-0.32	0.4	0.76	0.49	0.34	-0.03	0.62	0.58	0.22	0.11	0.61	0.4	0.27
PCDHB10	-1.01	-1.05	-1.23	-0.98	-1.28	-0.47	-0.5	-0.17	0.09	-0.22	0.21	-0.24	0.14	0.07	0.2	-0.66	-1.08	-0.81	-0.9	-1.18	-1.33	-0.35	0.79	1.03	1.23	0.74	1.57	-0.23	0.68	0.35	-0.37
PFN2	-0.24	-0.56	-2.14	-1.03	-1.28	0.28	-1.26	-1.62	-1.25	0.17	-1.02	-0.88	-0.87	0.08	0.11	-1.11	-1.16	0.77	0.82	0.29	1.36	0.32	-0.69	-0.4	-0.71	0.19	-1.33	1.37	0.78	0.16	0.51
PHGR1	-0.99	-0.49	-1.31	-1.29	-1.28	-0.01	2.17	1.03	2.69	0.68	-1.24	-1	0.33	0.83	-0.28	-1.4	0.05	1.1	0	-0.93	-0.81	-1.47	-0.19	-0.36	-0.48	-0.23	0.22	-1.1	1.08	0.58	0.59
PPM1N	-0.41	-0.55	-1.26	-0.51	-1.28	-1.13	-1.26	-1.21	-0.99	-0.89	0.4	0.01	0.89	-1.03	1.34	-0.25	-0.37	0.21	0.19	-0.04	-0.92	-0.59	0.57	0.37	0.57	0.33	-0.69	0.01	-1.44	-0.11	-1.01
PREX1	-0.67	-2	0.4	-1.57	-1.28	0.31	0.39	0.28	-1.75	0.25	0.12	-0.57	0.83	0.43	0.49	0.07	0.14	-0.77	-1.06	-0.51	0.22	0.28	-0.26	-0.57	0.17	-0.29	-0.63	-0.66	0.66	1.18	-1.07
PSPC1	-0.21	0.22	0.26	0.33	-1.28	-2.02	-0.18	-1.51	-1.77	-1.34	-2.37	-2.34	-0.56	0.65	0.18	-0.3	0.18	0.22	-0.82	-0.29	-1.39	-0.4	0.47	-0.71	-0.63	0.44	0.55	-1.39	0.32	-0.13	-1.78
PXDC1	-2.03	-0.41	-1.2	-2.26	-1.28	-0.13	-0.38	1.18	0.51	0.6	1.04	1.23	0.53	0.35	1.29	-0.03	0.17	0.18	-0.88	0.84	0.24	0.52	0.92	-0.1	1.66	1.85	1.69	1.13	1.45	1.84	1.2
RB1	0.22	0.31	-1.84	-0.96	-1.28	-0.94	-0.47	-0.14	-0.31	-1.24	-0.07	-0.56	1.51	-0.03	-0.08	0.03	-0.81	-0.79	-5.05	-2.4	-0.91	-1.18	-1.25	0.29	-0.67	-0.06	0.2	-0.25	-1.55	-2.66	0.07
RIBC1	-1.47	-0.94	-0.75	-1.8	-1.28	-1.34	-0.17	-0.17	-0.58	-0.09	0.03	0.24	-0.52	0.29	1.08	-0.32	-0.38	-1.33	-0.84	-0.71	-1.14	1.11	-0.27	-0.02	0.66	-0.39	0.43	-0.65	1.2	0.52	0.36
SIRPA	-0.61	-0.14	0.42	-1.43	-1.28	-0.29	-0.46	-0.08	-1.06	-0.12	0.67	0.88	-0.05	-0.42	1.02	0.15	-1.15	-0.87	-0.09	-0.43	-0.25	-0.2	0.15	0.82	1.27	1.02	1.94	0.79	1.26	0.92	0.96
SNAP91	-0.23	-0.01	-0.58	-0.53	-1.28	1.76	-0.23	0.45	0.12	-0.21	0.88	0.82	-0.14	0.51	-0.29	-0.67	0.18	0.91	0.64	1.37	1.12	0.16	0.15	1.07	0.33	0.82	0.16	1.47	-0.77	-0.75	-0.76
SRPR	-0.28	-1.35	-1.87	-0.27	-1.28	-1.22	-0.46	-1.05	-0.39	-0.71	1.69	0.91	-1.79	0.54	0.16	-0.81	-0.64	1.42	-0.15	0.37	1.32	-0.15	0.26	-0.57	0.61	1.77	0.64	0.89	1.36	0.11	-0.62
ST7-OT4	-0.72	-1.55	-1.33	-0.61	-1.28	-1.9	-2.47	-2.64	-1.9	-0.4	0.85	0.39	-0.45	1.03	-0.88	0.08	-2.19	-0.7	-0.39	-0.31	-0.1	-1.35	0.2	-0.1	-0.82	0.67	0.43	0.13	0.79	0.89	1.01
TAGLN2	0.87	1.14	0.85	0.49	-1.28	1.58	2.46	1.97	1.44	1.83	0.15	-0.94	-0.49	0.44	-0.48	-0.17	-0.11	-0.23	1.37	0.38	-0.86	1.28	0.58	1.54	1.32	1.36	1.58	0.09	0.12	2.2	1.2
TCTN3	-0.2	-1.33	0.59	-0.63	-1.28	0.35	-0.2	-0.29	0.24	0.88	-0.59	-0.3	0.1	-0.65	0.75	0.55	-0.54	-0.92	-0.3	-0.23	0.34	1.27	0.81	0.1	-0.07	0.21	0.38	-1.23	1.37	0.64	1.89
UBA2	-0.36	1.03	0.44	0.78	-1.28	0.71	0.65	0.37	1.1	-0.57	0.05	0.03	0.48	-0.68	0.56	-0.83	1.56	2	4.08	2.64	2.98	1.21	-0.77	0.61	-1.45	-0.18	-1.47	0.08	0.4	0.74	0.45
VPS45	-1.96	-2.4	-1.28	-2.09	-1.28	-0.3	-0.38	-0.15	-0.92	0.31	0.72	0.2	1.14	-1.02	-0.45	0.23	1.66	3.02	2.98	1.5	0.52	1.28	-1.01	1.47	-0.79	0.24	0.03	0.84	1.4	0.32	1.51
ZNF621	-0.32	0.09	-0.82	-0.16	-1.28	1.04	1.24	1	0.32	0.16	0.77	0.42	-0.15	0.01	-0.37	0.54	-0.77	-1.25	-0.6	-0.22	0.06	0.27	0.48	0.11	0.98	1.45	1.41	0.45	0.15	0.53	0.66
ACAD10	-1.14	-1.58	-1.81	-1.33	-1.27	-0.79	-0.83	-0.62	-0.26	-0.24	-0.19	-0.61	0.67	0.81	-0.86	-1.01	-0.33	0.63	-0.85	-0.02	0.49	-0.54	0.39	-0.36	-0.04	-0.72	-0.96	0.47	0.79	-0.75	0.27
ACSM2B	-0.2	-0.12	0.46	-1	-1.27	-0.74	0.57	-1.51	-0.43	0.32	0.44	0.45	1.25	1.04	0	-0.2	2.14	1.79	-0.1	0.58	0.89	1.02	0.75	1.26	0.81	1.08	1.36	0.06	0.65	-0.52	-0.62
APOBEC3G	-0.89	-1.34	-1.13	-1.13	-1.27	0.5	0.89	1.02	1.37	-0.47	0.62	-0.42	-0.02	0.53	-1.41	0.41	0.66	-0.1	0.17	0.26	0.54	-1.46	1.39	0.22	1.02	0.96	1.33	-0.99	-0.28	0.96	0.93
ARRDC2	0.32	-0.87	-1.06	-1.23	-1.27	-0.4	0.06	-1.81	-0.34	-0.36	0.53	0	-0.16	-0.89	0.4	1.08	0.86	0.94	0.47	-0.75	-0.49	2.35	0.8	0.04	0.04	0.64	0.47	0.15	-0.96	-0.52	-1.39
BET1L	-0.75	0.12	0.4	-0.87	-1.27	-1.65	-1.51	-1.87	-1.81	-1.19	1	0.29	0.46	1.1	0.28	-1.2	-0.33	0.06	-0.61	-1.11	-0.91	0.78	1.32	0.3	-0.32	0.27	0.7	1.97	-0.66	0.19	-0.86
CA5B	0.75	1.26	0.69	-0.49	-1.27	0.71	1.52	1.49	0.71	1.45	-0.28	0.32	0.38	0.16	0.94	-0.14	1.47	0.53	-0.06	-1.4	-0.79	0.24	1.13	0.06	1.05	1.14	2.5	-0.64	1.12	-0.14	0.12
CCNT2	-0.2	-1.57	-0.99	-2.38	-1.27	0.55	-0.34	-0.63	-0.63	-0.17	0.07	0.38	-1.13	-0.6	-0.12	-0.28	-0.79	-1.63	0.28	-0.25	0.91	-0.37	-1.88	-1.79	-0.86	-1.46	-1.69	-0.68	-1.74	-1.6	-1.9
CPLX1	-0.9	-0.25	0.91	-0.34	-1.27	0.25	-0.59	0.79	0.53	0.63	0.11	-0.59	1.09	-0.77	0.15	0.02	-0.22	-0.21	-0.99	-0.06	-0.75	0.1	-1.25	-1.04	-0.16	-1.75	-2.08	-0.28	0.03	-0.99	-1.32
CX3CR1	-1.63	-0.48	-1.46	-1.22	-1.27	-0.15	0.54	0.43	0.91	0.14	-0.01	0.16	0.09	-0.07	0.33	0.7	0.21	0.05	-0.87	-0.56	-1.05	-0.24	-0.51	-0.3	-0.66	-1.02	-0.56	0.59	-1.03	-0.42	-1.56
DDIT4L	-0.63	-2.11	-0.91	-0.36	-1.27	0.42	0.3	0.69	0.06	0.94	-1	-0.33	1.33	-0.03	0.27	0.3	-1.6	-1.37	-2.11	-0.36	-0.61	-0.86	0.02	0.09	0.47	1.13	-0.67	0.12	0.28	1.12	0.08
DUXA	-0.26	0.78	-0.09	-0.51	-1.27	-0.82	-0.64	-1.27	-1.44	-0.41	-1.78	-1.26	1.26	-0.66	1.46	0.55	0.06	1.05	0.26	-1.04	-0.49	0.91	0.16	0.57	0.44	0.35	0.24	-0.67	-1	-0.99	0.16
ENPP4	-1.17	-0.1	-1.09	-0.95	-1.27	0.09	-0.63	-0.52	-0.6	0.09	1.91	1.03	1.64	-0.09	-1.05	-0.75	-2.25	-1.66	-0.56	-1.49	-2.39	0.04	0.38	0.28	-0.19	-0.06	0.75	1.92	0.88	-0.45	-0.73
FBXL22	-0.5	0.09	-0.31	-0.48	-1.27	-0.81	1.08	0.27	0.18	0.47	1.28	-0.29	0.99	-0.58	-0.7	-1.62	1.89	-0.17	0.07	-0.06	0.21	-0.63	-0.21	0.03	-0.23	0.31	1.05	-0.57	0.14	0.11	0.48
GNMT	0.51	0.27	-0.03	0.06	-1.27	-0.51	-0.69	-0.87	-1.16	-0.76	1.64	1.51	0.11	0.09	0	0.73	0.23	0.38	0.7	0.78	0.34	-0.99	0.11	-0.1	-0.12	0.23	0.12	-0.74	-1.11	-0.46	-0.21
GOLGA6L2	-1.67	-1.96	-2.16	-1.74	-1.27	-1.08	-0.66	-0.57	1.02	-0.49	-1.44	-1.6	1.64	-0.44	0.27	-0.54	-0.89	-0.04	-1.44	-0.69	0.06	0.51	0.37	-0.79	-0.13	-1.17	0.46	-0.98	-1.87	-1.65	-0.75
HADH	-0.81	0.15	-0.27	-1.99	-1.27	-0.99	-1.07	0.28	-0.07	-0.95	0.53	0.46	1.8	0.94	-0.1	-0.17	0.41	-0.91	-0.87	0.56	0.44	-0.65	-0.69	0.06	-0.26	0.65	-0.87	-0.24	-1.45	-1.71	-1.02
LHB	-0.81	0.71	0.11	-1.53	-1.27	2.14	-0.1	-1.53	-0.06	0.74	-1.2	-1.62	0.63	-0.19	0.14	-0.14	-0.48	0.23	-0.17	-0.17	-0.17	-1.23	0.28	0.2	0.04	0.36	-1.03	0.44	0.45	-0.82	-1.23
MRPL50	0.01	-1.51	-0.59	-1.88	-1.27	-1.95	-0.36	0.24	-0.79	0.06	0.23	-0.53	-0.36	-0.31	0.32	-0.12	-1.14	-0.66	-0.41	-0.05	1.63	-0.46	0.71	-0.26	1	-0.11	0.37	-0.52	-0.86	0.27	0.97
MTMR8	-1.63	-1.29	-1.02	-1.13	-1.27	0.61	0.74	-0.57	0.31	0.03	0.22	-0.65	-0.29	0.96	-0.01	0.32	1.48	0.77	0.42	-0.35	-0.36	1.6	0.98	-0.07	0.68	1.47	1.39	0.05	-0.83	-0.01	-0.98
POLK	0.19	-1.04	0.19	1.15	-1.27	0.24	-0.82	-1.07	0.64	-2.43	0.43	0.59	0.72	-1.01	-1.45	-0.45	-1.98	0.45	-3.35	-1.19	-0.23	-0.86	-15.41	-1.49	-2.36	-2.11	-2.94	1.72	-4.32	0.08	1.97
PXDNL	0.18	-1.65	-1.27	-1.32	-1.27	-1.18	-0.6	-0.55	-0.79	-0.66	0.72	0.28	-0.48	0.01	-0.01	0.91	0.86	-1.14	0.1	-0.99	-0.45	-0.84	0.71	0.04	0.1	0.11	0.42	0.09	-1.75	-0.53	-0.84
RAB38	-0.97	0.48	-0.76	-1.78	-1.27	0.61	-0.92	0.35	-0.62	1.42	-1.41	-1.41	1.07	0.31	0.97	0.31	-1.6	-0.47	-0.67	-0.73	-0.71	0.67	1.29	0.42	-0.36	1.2	-0.29	0.32	-0.18	-0.8	-0.79
RFXAP	-0.31	-0.06	-0.45	0.04	-1.27	-0.44	0.74	0.16	1.14	-0.11	-0.68	-0.15	0.44	-0.47	-0.05	0.68	-0.87	0.31	-0.59	0.03	-0.14	0.02	0.47	-0.61	0.57	0.16	0.83	0.13	0.72	0.84	0.8
RXFP3	-0.87	-0.11	0.22	0.39	-1.27	-0.97	1	0.22	-0.55	-0.19	0.29	0.3	-2.3	-0.7	0.22	0.18	-1.07	-1.89	-0.99	-1.07	-1.42	-0.4	-0.54	-0.44	-0.19	-0.21	1.02	-0.79	1.32	0.99	0.33
SLAMF9	-0.23	-0.29	-0.46	0.44	-1.27	-0.21	-1.28	-0.81	-0.99	-0.04	1.55	-0.53	1.42	-0.34	-0.5	0.42	0.62	0.58	0	0.46	0.44	-0.3	0.57	-0.47	0.62	-0.44	0.09	0.23	0.9	-0.9	-1.68
TEKT3	-0.93	-0.45	-1.69	-1.72	-1.27	0.1	-0.49	-0.88	0.01	0	-0.13	-0.43	-0.5	0.96	-1.91	-0.38	-0.72	-0.88	-0.97	-0.75	-1.68	1	-0.21	0.29	-0.74	-0.67	-0.1	1.15	-0.16	-0.1	0.26
TP53I13	0.71	1.15	-0.15	0.51	-1.27	1.8	1.47	1.77	1.66	0.95	-0.51	-0.75	0.89	1.07	0.24	-2.58	0.97	0.78	0.35	-0.07	0.61	0.39	0.47	-0.97	-1.01	-1.28	-1.51	0.01	0.15	0.56	1.65
TRIM3	0.04	-0.55	-0.61	0.12	-1.27	0.24	-0.7	-1.15	-1.24	0.13	1.27	1.07	-0.84	1.38	0.99	-0.72	1.41	1.83	-0.27	0.41	0.1	0.58	-0.53	-0.82	0.57	0.79	0.54	0.55	-0.25	-0.18	0.03
UBXN2B	-0.39	-0.44	-1.83	-1.19	-1.27	-0.56	-1.44	-1.03	-2.08	-1.31	0.43	-0.73	1.54	0.81	-0.17	-0.85	0.6	-0.69	0.32	0.63	0.68	0.32	-0.34	-0.31	0.16	-0.45	-0.72	1.3	-2	-1.42	0.73
WISP1	-1.14	0.52	-0.75	-1.1	-1.27	0.3	1.83	1.42	0.44	1.2	1.4	0.74	-0.89	0.26	1.35	-0.67	-1.4	-1.31	-2.39	0.36	-0.63	0.61	0.17	-0.02	0.78	0.86	0.5	-0.3	2.02	0.34	-0.5
ANKRD63	0.5	-0.51	-1.01	1.49	-1.26	-1.81	-0.27	-2.2	-0.79	-1.81	-1.84	-0.49	-0.56	-0.75	-1.09	-0.16	1.29	1.32	-0.09	-0.03	0.68	-0.28	-1.31	-0.96	-0.52	-1.6	-1.89	-1	-0.05	1.72	2.32
C10orf120	-1.27	-1.18	-1.04	-1.73	-1.26	-1.61	-1.43	-0.76	-1.04	-0.41	-1.8	-0.6	0.41	0.34	0.14	-0.07	-1.06	-1.07	-0.73	-0.95	-0.8	-0.45	0.61	1.01	-0.04	-0.29	1.26	0.11	-0.29	0.52	-0.36
C6	-0.02	-1.82	-0.43	-0.89	-1.26	1.11	0.85	0.88	0.59	1.52	1.32	0.55	0.91	0.22	1.2	-1.28	-0.44	1	-0.11	-1.02	0.4	-0.89	-0.29	-0.46	-1.1	-1.01	-1.26	0.04	1.35	1.55	1.58
CCDC125	-0.88	-0.82	0.04	-0.83	-1.26	-0.54	-1.65	-0.59	-0.52	0.23	1.71	1.48	-0.83	-0.23	-0.68	0.44	0.03	-0.04	-0.88	-1.39	-1.77	0.48	0.02	0.67	-0.19	0.86	-0.43	0.68	0.04	0.56	0
CHST13	-0.32	-1.13	0.27	-0.1	-1.26	0.42	-0.34	0.47	0.08	-0.25	-0.46	0.63	-2.08	-0.91	1.56	1.62	0.2	-0.32	-0.93	-0.68	-0.37	0	0.45	-0.58	-0.62	-0.1	0.13	0.25	0.86	1.06	0.12
COX7A2	-1.73	-1.58	-0.49	-1.94	-1.26	0.87	1.57	0.6	0.99	-0.15	1.1	0.43	1	-0.36	0.26	0.2	0.2	-0.53	1.25	0.99	0.9	0.87	1.07	1.02	1.65	1.66	1.53	0.35	-1.45	-0.98	0.04
COX7A2L	-1.53	0.01	-0.7	-1.75	-1.26	0	1.65	1.6	1.15	0.49	-0.62	-1.3	-0.48	0.03	0.92	0.44	0.48	0.3	0.08	0	0.52	-0.19	0.49	-0.2	0.65	0.17	0.37	0.25	-0.15	-0.68	-0.15
DEFB123	-0.33	-0.98	0.22	-1.05	-1.26	-0.53	0.72	-0.09	0.37	0.38	0.64	0.49	-0.2	-0.45	0.42	0.54	-0.72	-0.24	-0.21	-0.55	-0.13	-0.77	-0.44	0.83	-0.57	0.92	0.42	1.6	-1.39	-0.85	-2.03
E4F1	-0.28	-1.11	-0.59	-0.12	-1.26	0.86	-0.41	-1.33	-0.18	-0.65	0.98	1.31	0.84	0.9	0.35	-0.16	0.16	-0.02	2.45	2	2.34	-1.52	-0.17	-0.54	-0.02	0.63	0.07	0.66	0.94	0.92	0.74
ECE1	-0.42	-1.39	-0.33	-0.52	-1.26	1.72	0.43	1.5	0.16	0.57	-0.14	-0.65	0.46	-0.49	-0.01	0.41	-0.88	4.78	0.23	-0.32	0.25	-0.24	-0.46	0.14	0.53	-0.2	0.26	0.66	0.83	0.59	1.2
HIGD2B	-0.53	-0.89	-2.21	-0.76	-1.26	0.27	-1.95	-1.54	-0.33	-1.3	-1.3	-0.15	-1.19	-0.17	1.17	-2.73	-0.56	1.23	0.88	0.94	1.93	-0.65	0.02	-0.47	0.28	0.85	0.19	-0.13	0.76	0.81	0.18
INTS9	-1.09	-1.15	-0.41	-0.36	-1.26	0.89	0.63	0.93	1.7	0.3	-1.18	-0.24	-1.21	-1.04	-1.05	-0.53	-0.57	-0.7	-0.73	0.18	-0.12	-1.01	-0.3	-0.41	-0.71	-0.11	0.25	-0.5	-1.33	-0.98	-0.08
IWS1	-1.78	-1.81	-0.95	-1.15	-1.26	1.42	0.98	-0.56	0.65	-0.06	1.53	-1.06	0.65	-2.83	-1.57	-0.18	0.62	2.14	1.77	2.28	2.6	1.41	1.18	2.36	1.23	1.78	-0.52	-0.66	0.08	0.86	0.37
LYNX1	-0.95	-0.33	-0.7	-1.06	-1.26	-0.3	0.5	-0.9	-0.66	0.11	-0.29	0.89	0.27	0.41	-0.14	0.13	1.28	-0.25	-0.45	-0.23	0.17	-0.3	0	0.02	0.36	-0.31	-1.02	0.13	-0.33	0.6	0.38
LYRM2	-1.54	-0.86	-1.03	-0.67	-1.26	-1.19	-2.07	-1.08	-1.88	-1.33	-0.14	0.62	0.14	-0.04	0.97	-2.01	0.62	-2.28	-0.62	-0.34	-1.51	0.02	0.36	0.78	-0.02	0.98	0.89	0.09	-0.95	0.16	-0.02
MPRIP	-0.04	-0.34	0.62	-0.04	-1.26	-1.37	1.24	0.42	-0.24	0.37	1.08	2.43	0.09	0.62	-1.1	1.49	-0.22	-0.96	-0.87	-0.12	1.58	2.18	0.17	0.12	-0.04	1.81	0.49	0.53	-0.34	0.82	0.15
MUC6	-0.89	0.88	-0.43	0.34	-1.26	0.79	-0.66	-0.8	-0.05	-0.55	0.72	0.96	1.11	-0.95	0.83	-0.55	-0.03	0.9	0.06	0.06	-0.54	0.27	0.33	0.72	0.19	0.04	0.76	0.48	-0.73	-0.87	0.74
NDUFA12	-1.2	-1.4	-0.69	-2.98	-1.26	0.22	-0.13	-0.11	0.32	0.4	-0.53	0.02	-0.99	0.32	1.33	0.07	0.08	-0.77	-0.34	-1.07	-1.06	0.02	0.43	-0.09	0.33	0.27	0.22	-0.02	-1.97	-0.2	-1.95
OVOL2	1.02	0	0.04	0.75	-1.26	-0.39	0.87	-0.53	-1.25	-0.38	1.11	1.24	0.34	0.6	-0.43	-1.03	1.29	1.19	-0.06	-0.01	0.56	0.34	0.83	0.5	1.45	0.97	2.06	-0.38	1.23	1.1	-0.27
PLD4	0.68	-0.03	0.39	1.54	-1.26	0.53	0.5	-0.25	0.44	1.23	-0.98	-0.2	2.13	-1.48	0.54	-0.56	-0.15	-1.85	-1.04	0.03	0.04	0.88	-0.2	-0.26	1.21	0.15	0.58	0.17	-1.33	-2.08	-2.15
RANBP9	-0.32	0.6	0.51	0.26	-1.26	0.65	-1.92	-1.02	-0.89	-1.2	-0.95	0.14	0.47	-1.34	0.25	1.74	0.17	-1.96	0.83	1.34	0.41	-2.18	-1.45	-1.65	0.35	-2	-2.68	-0.77	0.15	-0.43	0.56
TNFAIP1	-0.57	-0.42	0.7	-0.23	-1.26	-0.32	-0.13	-1.21	0.32	-1.07	0.74	0.49	-0.12	0.01	-0.08	0.58	0.53	-0.93	-0.18	0.14	1.86	-0.4	2.13	-0.51	1.54	0.93	1.92	0.57	0.83	-0.68	-1
UBAP2L	0.71	-0.6	-2.17	0.65	-1.26	-0.22	-0.9	-1.23	0.59	-0.02	0.01	-0.01	-0.26	0.43	1.47	-1.01	2.09	2.56	-0.23	0.02	0.84	1.11	-0.19	0.46	-1.62	0.31	0.98	-0.19	-0.15	-2.26	-0.38
VPS37C	0.39	-0.93	-0.39	-0.63	-1.26	-1.36	-3.54	-1.06	-1.37	-1.29	-0.51	-1.34	-1.28	0.23	-0.53	-1.36	0.31	0.38	-0.57	0.44	0.11	-1.33	0.34	0.54	0.96	0.48	1.02	-0.09	0.24	0.49	1.32
ZMYND15	0.7	1.31	0.44	0.03	-1.26	0.56	1.94	0.75	0.81	-0.66	-1.16	-0.89	-0.85	-0.1	-0.35	1.06	0.72	0.98	-0.39	-0.36	0.07	1.06	0.2	-0.09	-0.35	-0.5	-1.66	-0.18	-0.3	-0.56	-1.46
ZNF428	-2.12	-3.85	-1	-0.71	-1.26	-0.31	0.94	-0.7	-0.53	-0.31	-1.13	-0.43	0.97	-0.14	-0.88	-1.28	-0.15	0.75	1.13	0.98	0.49	-2.61	-2.05	0.64	-1.01	1.44	-0.98	-0.65	-0.67	-0.46	0.66
ABCG5	-1.12	-0.96	-0.87	-0.67	-1.25	-0.83	0.13	1.2	-1.62	0.55	0.52	1.33	0.3	0.08	-0.49	0.42	1	-0.1	0.2	0.53	1.26	0.06	0.07	0.04	0.26	-0.31	-1.22	-1.27	-0.27	0.22	-1.38
C16orf90	0.89	0.74	-0.46	0.99	-1.25	0.19	-0.29	-0.06	0.5	1.37	0.81	1.34	0.39	0.95	0.56	-1.28	0.07	1.36	1.1	0.36	-0.18	-1.4	0.13	0.41	0.64	1.24	0.08	1.24	0.16	1.89	0.23
C1orf185	-0.4	-0.33	-0.23	-0.87	-1.25	-1.33	0.32	-0.82	-0.94	-0.67	0.24	-0.29	0.68	0.03	0.67	1.25	0.79	0.59	-0.28	-1.24	0	1.41	1.03	0.19	0.55	0.55	1.07	-0.57	-0.84	-0.09	-0.57
CARM1	0.01	-0.29	2.55	0.77	-1.25	2.63	0.82	2.48	0.25	-0.97	0.95	0.72	2.76	0.74	1.2	1.43	0.68	-0.77	1.04	-0.03	-0.28	-1.08	-1.71	-1.12	2.29	-1.44	-0.06	-0.62	1.42	0.13	0.13
CCR9	-0.08	-0.35	0.3	-0.32	-1.25	-1.72	-1.09	-0.69	-0.88	-0.2	-0.28	-0.44	-0.86	-0.38	-1.49	0.5	-1.42	0.13	0.45	-1.14	-1.88	1.5	0.19	0.14	-0.41	-0.14	-0.1	0.38	-0.54	0.09	0.27
CELF5	0.56	-1.19	-0.92	0.56	-1.25	-0.15	-1.18	-1.54	-1.17	-0.17	-0.16	-0.21	-0.35	0.28	0.07	0.71	0.59	1.26	-0.59	0.57	0.35	-0.16	-0.63	-1.59	0.43	-0.56	0.09	0.03	-0.65	0.17	0.64
CKAP2L	0.37	0.21	-0.23	0.7	-1.25	-0.71	0.28	-0.84	-1.29	-0.69	-0.57	-0.3	-1.82	1.46	0.05	0.34	0.88	-0.38	-1.52	-0.71	-0.29	-1	0.76	0.19	-0.68	-0.79	0.15	-0.62	0.28	0.3	-0.48
COCH	-1	-1.01	-1.74	-1.3	-1.25	-0.06	0.93	0.93	-0.08	1.39	-0.41	-0.2	-1.55	0.41	-0.01	0.72	-0.14	1.07	0.96	0.99	0.97	2.47	-0.33	-0.84	-1.65	-1.8	-1.93	0.34	-0.12	-0.28	-0.63
DBP	-1.47	-1.82	-1.75	-1.3	-1.25	0.14	0.18	-0.11	1.2	-1.07	-1.12	0.94	0.61	-0.03	0.53	1.61	0.1	0.19	-0.43	0.39	0.69	0.19	-0.58	0.35	0.11	0.55	-0.68	0.68	0.61	-1.15	-0.31
DCTN3	0.9	-1.01	1.49	0.96	-1.25	-1.47	-0.9	-1.78	-1.14	-0.51	-0.58	0.85	-1.25	0.32	-0.16	-0.23	1.38	1.74	2.36	1.43	2.62	-0.1	-0.05	0.14	0.04	-0.19	-0.25	-1.88	-0.94	0.02	-0.93
DUSP23	-0.42	-0.42	1.01	0.88	-1.25	-0.24	-0.66	-0.35	-0.46	-0.53	2.06	1.76	-0.01	0.62	-0.95	-0.38	-1.35	-1.72	-1.12	-0.52	-0.48	-0.16	0.21	-0.1	0.94	-0.38	0.61	0.03	0.35	-1.32	-0.91
FBXW8	-1.63	-0.34	-0.4	0.13	-1.25	0.15	-1.04	-0.74	0.54	-0.35	0.21	0.67	-0.01	-0.67	0.31	0.42	0.51	0.29	-0.3	-0.25	0.4	0.87	-0.09	0.22	1.15	1.19	0.16	0.11	0.54	-0.95	-0.14
FRAT2	-1.06	-0.75	0.3	0.18	-1.25	0.94	1.3	0.7	0.82	0.2	1.9	3.26	2.16	-0.01	0.08	1.44	1.53	-0.33	-0.11	0.43	0.61	-0.15	0.36	0.23	1.09	0.73	1.99	1.25	1.35	0.56	1.74
HARS2	-0.47	-0.24	0.29	-0.97	-1.25	-0.18	-0.04	0.1	-1.24	-0.7	0.26	0.41	-0.15	0.5	0.49	0.34	3.08	0.92	1.66	1.31	0.82	-0.65	-1.85	-0.59	0.69	0.09	-0.96	1.13	-2.13	0.28	0.73
HTR1D	-0.99	-2.12	-0.95	-1.64	-1.25	0.23	-1.02	1.28	0.81	0.53	0.3	0.46	-0.08	0.15	0.69	-0.41	-1.43	0.2	0.3	-0.61	0.21	-1.27	0.02	0.4	1.04	0.46	1.62	-0.72	0.14	1.11	0.53
IRS4	0.4	-0.45	-0.11	0.68	-1.25	0.44	0.72	0.99	2.37	0.5	0.1	0.8	0.67	0.24	1.14	0.03	0.76	0.11	0.06	-0.38	0.74	1.52	0.28	-0.33	0.61	-0.49	-0.28	-0.64	-1.02	-0.34	-0.92
KLB	-0.92	-0.7	0.72	-0.73	-1.25	-0.18	-1.32	-0.38	0.18	-0.62	-0.68	-0.13	-1	-0.79	-0.18	-0.7	1.21	1.4	-0.93	0.06	-1.43	-0.98	-0.02	-1.21	1.34	0.82	-0.07	-0.96	1.56	0.56	1.33
KRTAP21-2	0.07	-0.33	0.23	-0.27	-1.25	0.68	-0.54	0.44	-0.54	1.27	NA	NA	NA	NA	NA	-1.69	NA	NA	NA	NA	NA	0.05	1.35	0.4	-0.32	-0.38	0.39	-0.24	0.43	-0.19	1.2
LGALS8	-0.55	0.05	-0.32	-0.21	-1.25	-0.69	-1.31	-0.69	0.14	0.57	-0.54	-0.59	0.95	0.54	0.92	0.28	0.24	-0.78	-0.75	-0.12	-0.83	-1.51	0.24	0.16	-0.72	-0.07	-0.49	-0.45	-0.19	1.43	1.23
LILRA4	0.5	-0.97	1	0.5	-1.25	-0.35	0.66	0.77	0.33	0.48	0.06	0.1	-0.84	0.84	0.58	-0.19	1.27	1.03	0.52	0.08	0.7	1.48	-0.97	0.41	-0.08	-0.24	-0.37	-0.89	1.28	1.8	1.67
LYPD6	-0.71	0.14	0.01	-1.91	-1.25	-1.16	-1.58	-0.73	-0.98	-1.38	-0.29	-1.15	-2.25	-0.67	-0.96	-1.79	-0.21	-0.44	0.28	-0.99	-0.39	0.45	-0.59	-0.18	-0.89	0.55	-0.49	0.48	-1.53	-2.14	-0.65
MAP2K3	0.2	-1.75	-0.04	0.08	-1.25	-0.37	-1.32	-2.89	-1.07	-1.32	-0.23	0.79	2.63	2.38	0.63	-1.84	-1.42	0.44	-2.59	-0.89	0.34	-2.36	-1.92	4.18	-0.2	-0.46	-0.02	-1.53	3.86	-0.16	3.15
MED29	-0.17	-0.39	0.46	-0.41	-1.25	0.73	0.91	0.12	1.01	0.41	-0.39	0.32	-0.65	-0.32	0.22	0.24	1.02	0.12	0.45	0.74	0.08	-1.69	-0.57	-1.06	0.4	1.02	1.05	0.14	-0.84	-1.14	-1.94
NREP	-0.25	0.55	0.11	-0.75	-1.25	-0.02	-0.97	-0.13	-0.98	-1.36	-1.99	-0.12	1.54	0.78	0.81	-0.28	-0.62	-1.18	-0.5	0.21	0.44	0.54	0.95	0.38	0.14	0.91	-0.95	-0.75	0.19	0.2	0.44
OR8D2	-1.09	-1.48	-0.61	-0.54	-1.25	0.42	-1.35	-0.14	0.77	0.31	-0.27	-0.33	-0.73	0.14	0.2	-0.32	0.48	-0.12	-0.85	0.87	0.17	0.69	-0.56	0.25	0.85	1.33	0.53	0.06	-0.49	0.22	-2.08
SNTG2	-0.75	0.99	-0.23	0.07	-1.25	1.29	1.56	1.55	1.85	1	-0.4	-0.04	-0.37	-0.67	-0.41	1.53	-0.02	-0.02	-1.17	-0.01	-0.05	-0.17	0.1	-0.23	0.51	0.19	-0.38	0.01	1.29	0.04	0.88
STK32B	-1.41	-1.02	-1.05	-0.92	-1.25	0.41	0.34	-0.01	0.33	-0.82	-0.53	-1.96	-0.07	0.52	-0.59	0.14	1.59	0.66	0.17	-0.73	-0.07	-0.71	0.17	-0.88	-0.42	-0.02	-0.69	-0.64	-2.25	-1.47	-0.96
TCP11L1	0.05	-0.27	-0.71	-1.21	-1.25	-0.75	-1.1	-1.41	-1	-0.96	-1.09	0.48	-0.88	-0.19	0.12	-1.77	-1.32	-1.27	-0.91	0.15	-0.16	-2.01	-0.43	-0.45	0.51	-1.1	-0.45	-1.93	0.05	0.11	-0.64
TNFRSF6B	-0.18	-0.44	-0.25	-0.24	-1.25	1.14	0.41	0.69	1.7	1.85	1.21	1.17	-0.03	0.7	-0.29	1.07	-0.49	-0.88	-0.96	-0.88	-0.7	-0.65	-0.6	-0.49	0.79	0.61	0.13	-1.49	1.2	1.22	-0.42
UBAP1	-0.01	0.08	-0.42	-0.05	-1.25	1.75	1.39	1.36	2.27	1.88	-0.63	-0.61	0.14	1.42	0.38	0.01	-0.13	-0.04	-0.41	-0.42	-0.7	-1.35	1.1	0.65	0.02	0.86	0.14	0.15	-0.63	-0.18	-0.92
UBASH3B	-0.19	-0.23	-0.16	-0.3	-1.25	0.47	-0.63	0.33	0.41	-0.73	-0.86	-0.86	-0.69	0.51	-0.1	0.69	-0.23	-0.89	-1.3	-0.49	-0.35	-0.81	0.08	0.38	0.6	-0.03	-0.37	-0.71	-0.29	-1.91	-1.31
AARS2	-0.87	-1.57	-0.93	-0.88	-1.24	0.18	-0.22	-0.79	-0.9	-0.75	-0.39	-0.3	-0.27	-0.07	-0.05	0.5	-0.09	-0.44	0.56	0.33	-0.14	0.52	-0.23	-0.67	0.19	1.02	-0.61	-0.26	-1.96	-1.01	-0.56
ALOXE3	0.28	0.43	0.25	1.12	-1.24	-0.33	0.25	1.15	1.23	0.8	-0.22	-1.26	-0.94	-0.23	-0.12	0.12	0.59	0.35	-0.98	-0.16	-0.45	2.04	-1.03	-0.32	-0.24	-0.66	-0.16	0.54	-0.05	-0.18	0.18
ARAP3	0.1	-1.76	0.27	-1	-1.24	0.88	0.04	0.32	0.36	0.8	-2.22	-0.96	0.14	-0.97	0.83	-0.53	0.17	-0.08	-1.09	-1.45	-0.68	-2.54	0.65	0.5	0	0.12	0.68	0.6	0.04	-1.28	-2.14
ARL6IP5	-0.15	-1.11	-0.66	-1.8	-1.24	-0.82	-1.96	-0.24	-1.49	-0.07	1.5	-0.79	0.49	0.43	1.06	-0.08	0.47	-1.15	-0.49	-0.53	-1.28	1.45	0.97	-0.77	0.51	-0.22	0.6	0.16	0.28	-0.42	0.39
ATP8B3	0.18	-1.54	0.15	-0.78	-1.24	-0.46	-0.63	0.36	-1.08	-0.42	0.44	-0.39	-0.43	0.56	-0.67	-1.65	0.12	0.57	0.21	0.97	0.7	-0.44	-0.2	-0.28	0.38	-0.48	-0.98	0.73	-0.08	0.26	0.47
ATRNL1	-1.42	-1.98	-0.79	-1.74	-1.24	-0.01	-1.93	-0.39	-0.91	0.83	0.64	0.35	0.54	0.94	-0.06	0.7	-0.94	-1.05	-0.19	-0.31	-0.5	-0.56	0.5	0.82	0.47	-0.38	0.83	-0.74	0.59	0.19	0.29
AUTS2	-0.16	-0.61	-2.31	-0.59	-1.24	-1	-0.75	0.08	-1.01	-0.73	-0.13	0.86	-0.7	-1.29	0.32	0.5	-0.85	-2.03	-0.36	-0.45	-0.47	0.23	-0.57	-0.69	-0.23	-1.1	-0.49	-0.21	1.06	0.82	1.62
CCDC82	-1.68	-0.56	-1.59	-1.09	-1.24	-1.11	-0.56	-1.09	-1.01	-0.39	1.67	0.92	0.72	0.65	0.3	-0.03	0.71	0.57	-1.5	-0.36	-0.31	-1.41	0.1	0.56	-0.02	-0.31	0.62	-0.7	-0.86	-0.23	0.3
CUL3	-0.84	-1.25	-2.68	1.18	-1.24	-1.61	1.61	-1.03	6.03	-2.63	-4.68	-3.64	0.2	-4	-4.77	-10.95	2.96	1.19	-3.35	-2.09	-0.57	-4.09	2.09	-5.78	-4.56	-5.66	-3.71	-4.55	-0.9	-2.61	-0.96
FAM71F2	-1.09	-0.26	-1.13	-0.94	-1.24	-0.84	0.27	0.33	0.27	-0.68	0	-1.44	0.11	0.17	-0.47	-0.09	1.61	2.24	0.67	1.34	2.04	1.68	0.91	-0.08	1.59	1.32	0.3	-0.72	0.75	-0.54	1.27
FBXL7	-0.13	-1.27	-0.19	-0.06	-1.24	0.77	-0.09	0.61	0.79	0.06	-1.01	0.05	0.36	-0.22	1.11	0.46	0.75	-0.47	-0.31	-1.26	-0.77	0.71	0.12	0.09	-0.6	-0.29	0.41	0.97	0.45	0.88	1.65
GPR83	-1.5	0.65	-1.83	-1.46	-1.24	-0.02	0.14	0.32	0.12	-0.4	0.5	1.26	0.81	0.26	0.47	-0.18	-1.5	-0.53	-0.87	-0.5	-0.6	0.43	-0.71	-0.32	-0.4	-0.08	-0.37	0.6	0.58	-0.3	0.43
MCM4	-1.36	-0.9	0.03	0.12	-1.24	-1.54	-0.24	-0.89	-0.75	-0.8	-1.16	-2.01	-0.82	-0.01	-0.23	-1.14	0.32	-0.35	2.2	2.28	2.79	-0.46	-0.28	-0.74	0.51	0.39	0.4	-2.76	-0.34	-0.82	-0.38
MXRA5	-0.16	0.02	0.69	0.19	-1.24	-1.61	0.4	-0.16	-1.12	-0.48	0.43	0.18	-1.17	0.37	-1.89	0.95	-0.24	-0.44	-0.22	-1.02	-1.1	0.63	0.91	0.66	0.56	0.16	0.95	0.76	0.94	0.14	1.37
NRDE2	-2.12	-1.55	-2.92	-2.78	-1.24	-1.04	-0.75	-0.25	-0.75	-1.27	0.84	-0.62	-0.96	-1.21	0.22	0.59	-1.71	-0.55	-0.08	-0.36	-0.28	-1.99	-0.15	-0.36	-0.91	0.25	-0.89	0.46	1.76	0.26	0.96
NSUN4	-3.03	-2.13	-1.82	-2.42	-1.24	-0.55	-0.28	-0.31	-1.35	0.17	0.41	1.05	0.56	1.03	-0.45	0.02	-0.77	-2.14	0.01	-0.58	-0.87	-1.22	-1.28	-0.93	-0.31	-0.51	-2.03	0.86	-0.88	0.04	0.16
PDCD6IP	0.03	0.23	-0.83	-0.64	-1.24	-0.46	0.15	0.49	-0.46	-0.07	-0.35	1.13	-0.14	1.02	0.27	-0.05	0.42	-0.52	0.32	0.75	0.68	-0.02	0.12	-0.62	1.83	0.65	0.95	0.11	0.54	1.32	0.24
PDE4D	-0.82	0.75	0.23	-0.21	-1.24	-0.74	-1.01	-0.92	0.29	-1.25	-0.29	0.48	-1.88	0.47	-0.47	1.21	-0.31	-0.38	0.33	-0.81	-0.94	0.99	0.81	0.3	-0.62	0.37	1.7	-1.49	-0.02	0.4	0.45
PLEKHO2	-1.06	0.38	-0.67	-0.78	-1.24	-1.57	1.21	-0.22	-0.54	-0.51	-0.13	0.95	-0.5	0.24	-0.18	-0.7	-0.11	-0.14	-0.46	-1.01	-0.59	0.32	-0.17	-0.38	-0.26	-0.96	0.56	-0.76	-0.22	0.36	-1.43
PTGS2	0.04	0.24	-0.35	-0.31	-1.24	-0.56	0.6	-0.53	-0.08	0.18	0.59	-0.47	0.56	1.07	-0.15	0.8	1.15	1.06	0.22	-0.44	-0.67	-0.41	0.89	-0.05	-0.93	-0.79	0.03	0.29	-0.38	0.37	-0.42
QPCT	1.09	-0.83	0.9	0.43	-1.24	-0.18	1.34	0.23	-0.61	0.32	0.03	-0.3	0.05	0.72	0.22	-0.12	1.19	0.75	0.41	-0.1	-0.28	1.01	0.21	0.34	-0.27	-0.35	0.76	0.08	-1.82	-2.45	-0.91
RCN3	0.29	-1.1	-0.46	-0.02	-1.24	0.88	1.08	0.55	0.59	-1.01	-1.07	1.71	1.04	0.71	-0.3	0.06	-1.96	-2.18	-0.77	-1.13	-0.67	0.75	-0.26	0.31	-1.35	-0.56	-0.89	-0.25	-0.16	0.74	0.35
SNX20	-0.43	-0.19	-1.26	-0.61	-1.24	-0.55	-1.31	-1.17	-2.28	-0.49	-0.63	0.84	-0.19	0.56	0.33	0.57	-1.16	-0.74	-0.56	0.03	0.64	-0.26	0.25	0.02	-0.77	-0.41	-0.33	-0.91	-0.14	-0.29	-2.32
TGFBR1	0.5	-1.96	1.62	-0.27	-1.24	1.2	2.05	-1.53	2.57	-2.26	-1.28	-0.7	-1.18	1.59	0.35	-0.49	0.87	1.62	-0.54	-0.04	0.29	0.26	-0.13	3.59	-0.93	-0.52	-0.11	0.54	0.35	0.11	-0.08
WDR37	-0.83	-0.69	-0.87	-2.46	-1.24	-1.32	-1.49	-1.03	1.4	-1.6	-2.03	-0.89	-1.47	0.98	0.05	-1.31	0.69	-0.29	-1.79	-0.1	1.49	-0.12	1.24	-0.67	0.33	-0.47	0.58	-0.59	0.04	-1.01	-1.93
ZMAT5	-0.29	-0.29	-1.55	-1.33	-1.24	1.22	1.01	0.03	1.37	0.69	0.99	-0.52	-1.61	1.21	0.31	-0.1	-2.6	-1.53	1.29	0.13	0	-0.03	0.88	-2.78	-0.25	-2.44	-1.39	0.01	-0.67	0.91	-0.12
ZNF136	-0.41	-1.07	-0.24	-0.57	-1.24	-0.84	-1.01	-0.93	-1.41	-0.87	1.1	1.54	0.25	-0.81	-1.45	0.36	-2.3	0.71	-1.41	-0.71	0.12	-0.17	-0.51	-0.04	0.26	0.07	0.12	-0.32	1.1	1.35	0.1
ZNF645	-1.04	-1.48	-1.42	-1.3	-1.24	-0.35	0.42	0.55	0.03	0.61	-0.65	-0.89	-0.04	-0.5	-1.31	-0.59	-1.15	-1.31	-0.87	-0.61	-0.33	-1	-0.15	0.65	0.23	0.12	0.03	0.07	-0.35	0.25	0.66
ZNF814	-1.2	0.01	-0.95	-0.68	-1.24	0.17	0.37	-0.02	0.4	0.54	-0.19	0.83	0.75	1.45	-0.9	-0.01	0.94	0.02	0.02	0.23	-0.07	0.07	-0.75	0.77	-1.46	-0.63	-2.07	0.14	0.68	0.67	2.08
ABI2	-0.72	-0.04	-0.02	-0.15	-1.23	0.67	0.36	0.83	-0.14	-0.42	0.1	-1.36	-1.39	-0.23	-0.73	-1.07	-0.82	0.81	1.07	-0.31	-0.11	-0.1	0.06	0.96	0.17	1.2	0.19	0.65	0.64	-0.09	0.12
C20orf173	-0.35	-0.49	-1	-0.89	-1.23	0.23	-0.27	0.63	0.61	0.77	-0.79	0.38	-0.08	0.45	0.41	-0.25	-0.61	-0.42	-0.62	-0.4	-0.12	-1.69	0.67	0.17	0.6	0.74	0.7	0.22	-1.02	1.1	-0.06
C6orf99	-0.88	-0.93	-2.52	-1.91	-1.23	0.65	-0.33	0.52	-0.11	0.46	-1.6	-1.11	0.8	-0.55	0.41	1.76	0.24	0.01	-0.42	0.45	1.24	1.14	-0.65	0.03	-0.06	0.55	-0.26	-0.29	-1.12	-2.1	0.01
CNOT10	-3.02	-2.1	-2.87	-4.38	-1.23	-0.6	-0.28	-0.32	-0.35	0.93	0.4	-1.03	0.38	-0.9	-0.75	1.05	-0.78	0.06	1.16	-0.14	-0.54	-0.82	1.96	1.12	-0.49	2.57	-0.15	1.01	-0.93	0.06	-0.62
DDX11	-2.69	-3.36	-3.72	-2.29	-1.23	-3.41	-1.1	-2.77	-3.14	-2.6	-0.94	-3.55	-2.55	-4.57	-4.19	-0.76	-0.15	0.3	1.96	0.77	-0.19	-0.97	-4.75	-4.12	-5.1	-6.29	-5.77	-8.38	-3.71	-3.38	-2
FAM171A1	0.48	-0.98	0.97	0.08	-1.23	0.24	0.6	1.19	0.44	0.52	1.35	2.4	-0.3	-0.12	1.29	0.31	-0.31	0.35	-1.32	-0.45	-0.2	-1.12	0.33	-0.12	1.57	-0.94	1.72	1.47	0.3	-0.34	0.95
GLRX3	-0.91	-0.76	-2.03	0.12	-1.23	-1.66	-0.92	-2.9	-2.8	-2.5	-1.05	-0.43	-1.54	-2.14	-2.71	-0.64	-1.22	-1.88	1.12	0.23	0.18	-0.41	-0.32	-0.79	-1.08	-3.22	-0.4	-0.73	-0.36	-0.75	-1.25
H1FOO	-1.5	0.54	0	-1.03	-1.23	-0.12	0.07	0.3	0.04	0.8	0.4	0.97	-0.36	0.82	-0.14	-0.57	0.49	0.81	0.11	0.79	0.51	-1.31	-1.22	-0.1	0.18	-0.33	-0.36	0.13	1.08	-0.45	-0.09
KIAA1143	0.44	0.03	0.66	-0.69	-1.23	-0.7	0.61	0.69	-0.05	-0.24	0.79	1.69	0.29	0.4	-0.13	-0.58	-0.24	1.19	0.96	1.18	0.9	0.12	-0.58	-0.22	-0.22	-0.21	-0.04	-0.07	0.05	1.68	1.16
LCOR	0.06	-0.01	0.44	0.96	-1.23	-1.55	-1.34	-1.72	-1.82	-0.51	-0.53	-0.09	-0.25	-0.2	0.37	-1.51	1.17	-0.05	-1.32	-0.39	-0.12	-0.88	-1.39	-1.1	-0.11	-2.42	-1.69	-1.19	0.2	-1.14	-1.54
MRPL38	-0.93	1.51	1	-0.5	-1.23	0.15	0.39	-0.22	-0.86	0.1	-0.66	-0.41	1.29	-0.88	0.42	0.31	1.46	-0.82	0.92	0.57	0.16	-0.32	0.18	-0.72	1	0.3	1.26	0.7	-0.29	0.82	-2.01
MTF1	-0.76	-2.29	-0.05	-0.21	-1.23	-0.23	-0.43	-1.23	0.9	0.06	-1.23	-1.32	-0.24	-0.39	1.13	1.24	-1.94	-0.86	-1.23	-1.33	-1.26	-0.49	-0.1	3.08	-1.37	-0.07	0.96	1.95	-1.05	-2.72	-0.57
MYO1F	-0.86	0.7	-0.34	-0.67	-1.23	-0.14	-0.32	0.34	0.15	-0.4	0.14	0.16	0.44	1.06	-0.72	-0.76	0.2	0.62	-0.77	0.41	0.32	1.25	-0.91	-0.33	-0.06	-0.06	-1.24	-0.86	-0.64	0.1	-1.72
OR9A2	-0.59	-1.64	0.77	0.18	-1.23	1.02	-0.12	-0.33	-1.1	0.71	0.02	-0.59	-0.79	-1.81	0.45	-3.02	-0.29	-0.37	-0.12	0.11	0.3	-0.72	-0.82	0.32	0.25	0.48	-0.21	0.88	-1.8	-0.85	-0.9
PBXIP1	0.49	-0.51	0.49	0.56	-1.23	1.11	1.63	0.35	1.39	0.29	-1.59	-0.42	0.48	0.27	-0.72	0.1	2.29	1.13	-0.55	-1.25	-1.51	0.46	-0.36	0.29	-0.83	-0.89	0.22	0.92	-0.74	-0.01	-1.8
PDX1	0.15	1.61	0.8	0.62	-1.23	0.86	0.36	0.58	-0.83	-0.94	-0.43	0.07	0.89	-0.03	-0.53	1.5	1.31	1.73	0.62	0.39	0.29	0.73	0.26	0.08	1.54	0.79	0.66	0.64	0.17	-0.64	0.58
PI3	-0.3	-0.68	0.65	-0.26	-1.23	-0.91	0.86	-0.44	-1	-0.26	-0.08	0.17	1.02	0.74	-0.04	-0.56	-0.85	0.04	-0.22	-0.42	-0.24	1.61	0.55	0.54	0.33	0.18	0.95	-0.36	-1.77	0.21	-0.41
RAB3GAP2	-2.07	-0.48	0.01	-0.17	-1.23	-0.65	-0.27	0.3	-1.25	-0.56	0.68	0.09	1.96	-1.38	-1.53	-0.1	1.15	-2.23	1.93	0.24	-0.28	0.61	-2.81	-1.71	0.35	2.2	0.39	-0.71	-1	1.58	-1.74
RIC8B	-0.04	-1.37	0.2	-0.14	-1.23	0.01	-0.44	1.31	1.67	-0.15	-1.23	-0.17	-0.15	-0.01	-0.65	-1.94	-0.61	-0.33	-0.15	-0.06	-0.69	-0.82	0.65	0.41	-0.01	-0.05	0.55	1.31	0.91	0.54	1.35
S100Z	0.03	0.15	-0.37	0.28	-1.23	0.35	0.89	0.32	1.28	0.48	-0.86	-0.12	-1.13	0.03	-0.1	-0.68	-0.23	-0.03	-0.85	-0.69	-0.61	-1.11	-0.54	-0.59	0.54	-0.32	-0.56	0.03	0.96	0.11	0.83
SHC3	-0.28	-0.25	-0.72	-0.1	-1.23	-0.43	0.3	-0.24	-0.3	0.11	2.55	1.88	-0.61	0.1	-0.04	-0.68	-1.84	-0.75	-0.37	-0.56	-0.71	1.77	0.17	-0.8	-0.08	-0.11	-0.01	0.67	-0.47	-0.67	-2.59
SLC30A4	-2.09	-1.46	-2.01	-2.67	-1.23	-0.58	0.85	-0.33	1.48	0.12	-1.28	-0.67	0.29	-1.03	0.22	0.84	-0.76	-0.5	-0.66	-1.59	-1.67	1.19	0.41	-0.39	-1.1	-0.86	-0.04	-0.24	0.16	-0.17	0.94
SYNCRIP	0.21	-0.34	0.29	-0.84	-1.23	-0.08	0.16	-2.45	-2.83	-1.46	1.34	1.84	3.63	-0.49	0.63	-0.27	-1.19	-2.41	0.42	-0.18	-1.16	-1.28	-0.93	0.17	-2.67	-0.57	-1.05	-2.17	0.11	-0.01	0.13
THEMIS2	-0.69	0	0.28	0.63	-1.23	0.27	0.78	-0.21	-0.89	-0.14	1.32	1.41	-0.07	-0.19	-0.66	-0.55	0.27	-0.01	-0.48	0.46	0.38	-1.06	-0.05	-0.03	0.04	-0.02	-0.81	0.24	0.28	0.21	0.54
TM4SF1	-1.15	-0.47	-0.86	0.15	-1.23	0.45	1.36	1.97	0.56	1.83	-0.68	-0.4	-1.78	-1.68	0.32	-0.57	-2.1	-0.06	-0.2	-1.77	-1.67	0.55	-1.53	-0.57	-0.86	-1.17	-0.74	0.6	-0.07	-1.12	-1.83
TPD52L2	-1.83	-0.2	-0.59	-0.32	-1.23	0.27	1.32	0.91	0.67	0.05	0.19	-0.71	0.19	-0.44	-0.65	1.42	1.18	-0.79	0.23	-0.35	-0.95	0.34	0.86	0.72	0.21	0.57	0.24	-0.84	-0.14	0.51	0.5
TTC23L	0.48	-0.32	-1.17	-0.58	-1.23	0.55	0.78	0.59	-0.04	0.19	0.25	0.32	-0.1	-0.81	-0.04	0.25	-0.77	-0.26	-0.02	0.17	0.23	-0.74	-0.37	0.3	0.77	0.09	0.06	-0.14	0.01	-1.11	-2.08
ZNF665	1.04	-1.01	-1.15	-0.59	-1.23	-0.78	-0.63	-0.27	-0.63	-0.63	-0.78	-1.89	1.06	0.07	-0.64	0.43	1.2	0.35	1.06	-0.16	-0.82	1.4	0.06	0.69	-1.1	0.05	0.31	0.44	-0.73	-1.56	-1.06
ZNF749	-0.87	-0.67	0.16	-1	-1.23	0.53	0.71	0.05	0.62	0.43	0.25	0.05	0.71	-0.29	0.12	-0.59	-0.01	-0.5	-0.49	-1.6	-1.69	-0.6	0	0.72	-1.25	0.83	1.18	1.47	-0.8	-2.03	-1.06
2004-08-01	-0.98	1.04	-1.32	-0.67	-1.22	-1.33	-1.08	-1.55	-0.81	-1.09	0.69	-0.5	-0.97	-0.25	0.21	0.37	-0.92	-0.62	-0.34	-0.9	-1.06	0.28	0.92	0.49	1.16	1.66	1.62	0.52	-1.16	-1.04	-0.15
AKAP13	-1.24	-2.42	-1.01	-0.54	-1.22	-1.29	-0.61	-0.83	-0.66	0.37	0.24	-0.65	-0.9	0.29	0.89	0.1	-0.46	-0.17	0.85	-0.2	-0.88	0.84	-0.61	0.95	-0.54	-0.05	-2.21	-0.45	0.19	-0.14	-0.67
ANAPC5	0.02	0.61	0.34	0.56	-1.22	-0.65	0.4	-0.26	-0.01	-0.28	-0.55	0.77	-0.11	-1.06	-1.04	-1.04	0.91	0.73	0.84	0.75	0.87	0.46	-0.26	-1.94	-0.5	0.02	-1.24	-1.17	-1.24	0.27	-0.88
B2M	0.09	-1.38	-0.48	-0.85	-1.22	-0.16	0.45	0.43	0.72	0.47	0.19	-0.14	0.1	-0.26	-0.2	-2.89	-0.65	-0.93	-2.06	-1.32	-1.55	-1.06	0.83	-0.39	-0.87	0.54	-0.07	0.3	1.23	0.74	0.9
B9D1	-0.58	-0.67	-0.7	-0.07	-1.22	-0.17	-1.1	-0.25	-0.5	0.38	-0.37	-0.67	0.59	0.15	0.28	1.13	-1.1	-0.18	-0.68	-0.37	-0.1	0.32	0.34	-0.31	-0.16	0.08	-0.97	1.25	-0.01	1.32	0.28
C3orf65	0.15	-0.67	-1.44	-0.51	-1.22	-0.98	-1.44	-1.6	-0.55	-1.41	-1.69	0.2	-0.13	-0.03	0.99	-0.36	-0.22	-0.42	-0.13	-0.87	-0.44	-1.21	-0.28	-0.56	-0.51	-0.32	0.83	0.58	0.43	0.28	-0.44
C9orf129	-0.57	-0.94	-1.6	-1.32	-1.22	0.36	-0.63	0.91	-0.41	-0.02	1.03	0.63	0.51	0.47	0.22	-0.26	0.81	0.98	1.17	1.24	0.65	-0.66	-0.14	0.2	0.6	-0.35	1.03	1.57	-0.99	0.78	-0.3
CARS2	-1	0.61	0.48	0	-1.22	-0.19	-0.36	-0.09	-1.15	0.6	-0.97	-0.33	0.81	0.12	-0.09	-0.2	0.92	0.35	0.71	-0.35	-0.65	-1.02	-0.32	-1.22	0.63	0.11	-0.02	0.76	-0.23	1.43	0.28
CCDC19	-2.41	-0.99	-1.17	-1.62	-1.22	0.14	0.56	0.69	0.75	-0.66	2.33	1.21	-0.21	1.18	1.64	0.98	1.28	1.79	0.77	0.1	0	-0.56	0.35	0.01	0.36	0.29	0.54	-0.41	0.51	-0.72	0.33
CCDC88A	-0.4	0.78	-0.25	-0.07	-1.22	-1.17	-0.49	-0.61	-0.89	-0.63	1.65	0.99	-0.17	0.81	-0.6	1.08	1.66	-0.37	-0.72	0.3	0.14	1.73	0.38	-0.19	0.4	0.71	-0.79	-0.26	1.23	0.81	0.5
CCR3	-0.98	-0.8	-1.5	-1.72	-1.22	-0.28	-0.44	1.23	0.61	0.01	1.11	-0.51	1.26	0.91	0.49	-0.92	-0.43	-0.97	0.04	-0.51	-0.21	-0.88	0.78	-0.22	-0.03	0.05	-0.44	-0.44	-1.14	1.17	0.91
DCST1	-0.47	0.29	0.25	-0.54	-1.22	0.97	1.24	1.45	1.13	1.16	0.38	-0.39	0.66	0.41	-0.41	-0.32	0.95	-0.1	0.77	0.15	-0.18	0.45	0.71	-0.24	-0.87	-0.35	0.36	-0.71	-1.26	-1.03	-1.74
DYNLRB2	-0.09	-1.67	-1.2	0.31	-1.22	0.09	-1.59	-0.73	-0.64	0.06	0.82	-0.06	-1.43	-0.17	0.26	-1.29	-0.98	0.4	0.53	-0.22	-0.86	-0.08	0.02	0.31	-0.5	-0.44	0.34	0.81	1.02	0.22	1.01
EIF4E2	-0.6	-0.76	-0.53	-0.69	-1.22	-0.55	0.57	-0.26	0.32	-0.05	-0.17	-1.01	2.66	-3.03	-1.37	0.56	-2.64	-0.73	-0.64	-0.73	-1.43	1.22	-0.28	-4.66	-2.12	-0.68	-1.66	-4.12	-2.96	-3.92	-2.43
EVL	-2.11	-0.12	-1.32	-1.55	-1.22	0.45	1.22	-0.22	0.69	0.54	0.53	-2.06	-0.21	0.33	-0.03	0.33	0.32	1.37	0.5	0.3	1.15	0.21	0.63	0.01	1	0.37	-0.23	0.14	1.74	1.91	0.66
HUWE1	-1.96	-4.21	-3.16	-0.78	-1.22	-1.14	-1.49	-4.89	-0.84	-5.5	-0.21	-1.13	1.7	-0.6	-4.16	3.49	-1.52	-1	2.83	0.48	0.83	-0.35	-2.98	-4.94	-5.13	-4	-3.5	-5.59	-1.93	-3.16	-2.44
IST1	-0.96	-2.53	-1.25	-0.43	-1.22	0.97	0.56	1.09	-0.95	2.27	-0.68	-0.13	-0.16	-0.47	-0.99	0.26	-0.08	-1.09	0.17	1.46	0.5	0.32	-0.95	-0.67	-1.31	-1.06	-1.5	-1.71	-1	-1.08	-0.09
KHK	0.71	-1	0.32	1.47	-1.22	0.4	0.81	-0.47	0.34	-1.08	-0.19	0.29	0.49	-0.21	0.75	1.79	1.5	0.2	0.36	0.44	0.51	-0.88	0.51	0.24	0.7	0.1	-0.26	-1.45	1.47	-0.77	-0.08
LY86	-2.17	-2.14	-1.64	-0.81	-1.22	-0.55	-1.95	-0.71	-0.57	-0.92	-1.39	-0.68	0.93	-0.03	-0.18	0.27	0.91	1.17	0.53	0.46	-0.12	-0.85	1.5	-0.3	-0.07	-0.48	-1.4	-0.07	-0.24	0.18	0.3
MAF	0.37	0.41	-0.23	-0.54	-1.22	0.24	0.13	0.17	-0.1	-0.79	-0.41	0.12	-2.14	0.75	0.44	-0.81	-0.21	-0.06	-0.49	-1.37	-0.11	-1.05	1.02	-0.8	-0.1	-1.8	-0.61	0.24	0.16	0.8	0.7
NIPBL	-2.9	-3.2	-2.9	-1.03	-1.22	-1.7	0.44	-2.36	-1.91	-0.83	0.02	-0.23	1.47	-1.68	-1.13	-1.27	1.48	1.9	2.47	0.4	-0.03	0.03	0.85	1.39	-1.32	0.42	0.36	-0.42	0.49	-1.22	-0.09
NR2F2	-0.39	-0.18	-1.43	-0.2	-1.22	-1.29	0.58	1.18	0.16	1.67	-2.62	-0.31	-0.56	-0.74	-1.08	0.45	-0.8	-0.45	-0.53	0.45	-0.36	0.62	-1.07	-1.27	-1.46	0.01	-1.05	-0.11	-0.45	0.53	-0.95
OR2L13	0.49	-0.93	0.55	0.62	-1.22	-0.7	-0.4	-0.49	-0.34	-0.14	1.31	0.32	-0.52	0.34	0.27	0.91	0.63	0.43	-1.57	-0.57	-1.11	-0.99	-0.03	-0.11	-0.54	0.56	-0.41	0.45	0.3	0.18	-2.25
PWWP2A	0.11	0.6	0.42	0.98	-1.22	0.5	0.77	0.57	1.53	0.82	1.28	-0.4	1.24	0.4	-0.87	1.52	1.04	-0.57	0.28	0.15	0.37	-1.15	0.43	0.14	0.28	-0.37	-0.15	-0.3	-0.96	-0.16	-2.01
RPGRIP1	-1.31	-2.49	-1.27	-1.82	-1.22	0.3	0.85	0.4	-0.09	-0.07	-0.31	-0.43	-1.53	-1.01	0.5	-0.34	-1.32	-0.08	-0.23	-0.38	-0.47	0.26	0.11	0.2	0.6	1.1	-0.37	-0.26	1.18	1.36	0.8
RPS6KB2	-1.33	-2.04	-1.16	-0.44	-1.22	1.93	1.1	1.67	0.56	0.43	0.82	-0.06	0.84	0.93	0.84	0.74	0.63	-0.99	-0.6	-0.53	-0.46	0.67	-0.18	-0.06	-0.31	-0.33	0.72	-0.11	1.56	-0.51	0.88
SLC9A2	-1.25	-2.06	-1.31	-2.07	-1.22	-0.54	0.61	-0.25	0.14	0.99	1.88	0.83	0.55	-1.43	-1.3	-0.92	0.71	0.51	-0.38	-1.44	-1.31	-0.87	-0.21	-0.82	-0.88	-0.48	-0.67	0.86	-0.16	0.8	0.45
SULT1E1	-3.39	-0.83	-2.11	-2.96	-1.22	-0.6	-1.28	-0.24	-1.08	-0.53	-0.62	-1.91	0.59	-0.72	-0.3	-1.08	-1.86	-0.69	-0.29	-0.89	-0.72	-1.28	-0.43	0.23	0.34	0.82	0.03	1.46	-0.82	-0.42	-0.2
AKIP1	-1.05	0.59	-1.06	-0.8	-1.21	-0.28	-1.22	-1.44	-0.09	-1.08	0.34	0.18	-0.16	0.43	-0.35	-1.03	-0.22	-0.67	-0.91	-0.18	-0.58	0.35	0.72	1.39	0.62	1.07	1.23	-0.08	-0.21	0.1	0.42
ARSB	-0.85	0.52	0.6	0.12	-1.21	-0.44	-0.86	0.43	0.21	-1.37	0.45	-0.42	-0.05	0.88	1.28	-0.01	-1.09	0.39	-0.25	0.18	0.22	1.81	0.99	0.73	0.55	0.47	1.66	0.57	0.76	-0.61	-0.7
CHERP	-1.55	-0.26	-1.02	-1.83	-1.21	-2.87	-0.47	-1.77	-1	-1	2.5	1.96	0.61	-1.23	0.45	0.13	0.97	4.37	1.89	2.01	0.88	1.41	-1.21	2.15	-3.22	-0.83	-0.54	-0.03	-0.48	-0.31	-2.17
DNAJB1	-0.85	0.89	0.8	0.42	-1.21	-0.98	-0.25	-0.68	-0.03	-1.14	-0.6	-0.22	0.68	0.35	-1.14	0.15	0.27	0.64	0.04	0.69	0.69	-0.41	-2.28	0.92	0.64	0.93	1.06	0.18	1.43	-0.13	0.3
EML6	-0.93	-1	-0.17	-1.17	-1.21	-0.65	0.29	0.1	-0.41	-0.74	0.42	0.38	-0.15	-0.27	0.39	-0.56	-0.48	-0.05	-0.72	0.31	-0.36	0.59	0.58	0.03	0.83	0.37	1.38	0.27	-0.99	-1.37	-0.7
F13A1	-0.2	1.58	0.48	-1.58	-1.21	-0.61	-0.52	-0.33	-1.44	0.04	0.59	1.44	-0.02	-0.34	0.05	0.76	-0.77	-1.8	-0.52	-0.08	-0.38	-0.04	0.17	-0.58	-0.1	-0.88	-0.66	-0.84	0.38	0.08	0
FAM172A	0.87	0.06	-0.56	-0.62	-1.21	-0.53	-1.36	-0.58	-0.64	-0.23	-0.19	-1.07	0.29	-0.5	-0.65	0.48	0.98	-0.19	-1.21	-0.19	0.75	-1.65	-0.26	-0.84	0.27	0.56	-1.33	-0.54	-0.1	-0.24	-0.01
FBXO7	-0.74	-0.99	-0.86	-0.16	-1.21	-0.25	-0.11	-0.08	-0.26	0.59	0.47	0.08	-1.17	0.75	-0.44	-1.56	-0.06	-0.48	-0.07	-0.78	-0.06	-1.6	-0.26	1.67	-0.67	0.69	0.34	0.5	-0.57	0.07	-0.86
FREM2	-2.22	-1.08	-0.63	-1.1	-1.21	-0.42	0.41	0.44	0.15	-0.49	-0.6	-0.64	0.19	-0.21	-0.68	0.61	-0.64	0.27	-0.17	0.3	-0.49	0.07	-0.19	-0.61	0.08	-0.3	0.48	-0.16	-0.12	-0.96	0.73
GTF2I	-0.51	-1.5	-0.72	0.16	-1.21	-0.97	-0.09	0.05	-0.32	-0.47	-2.42	-2	0.97	-0.77	-0.83	-1.21	1.19	-0.1	2.34	1.62	1.28	-1.88	-0.5	0.35	0.02	-0.13	-1.02	-0.58	1.09	1.93	0.99
HAS2	-0.6	-1.63	-0.95	-0.17	-1.21	-1.31	-0.73	-0.23	-1.13	-0.58	0.94	-0.39	0.35	-0.29	0.01	1.16	-0.11	-0.5	0.62	0.42	0.08	-0.71	1.23	0.52	0.24	0.66	-0.07	0.66	-0.29	0.47	-0.35
ITGA1	-2.96	-0.05	-1.49	-1.48	-1.21	0.53	-0.23	0.23	0.33	1.1	0.44	-0.7	0.82	-0.15	-1	-0.67	-0.24	0.1	-0.39	-0.52	-0.53	-0.72	-0.66	0.08	-0.59	0.14	-0.28	1.16	-0.03	2.02	0.03
L1CAM	-1.12	0.35	-0.67	-0.24	-1.21	1.6	1.18	0.87	1.69	-0.98	-2.42	-1.92	-1.25	0.43	0.91	1.4	-0.52	-0.55	-0.15	0.22	0.82	1.55	0.26	0.38	-0.49	0.57	-0.2	0.19	0.26	0.39	-0.27
LIPK	0.2	-0.41	0.97	-0.49	-1.21	0.33	-0.44	0.44	-0.36	0.86	-0.23	-0.68	-0.25	-0.9	-0.51	-0.02	0.02	-0.89	-0.69	-0.46	-0.24	-0.39	2.07	0.39	-0.11	-0.28	-0.18	-1.23	-1.16	0.35	-0.04
LRIG3	-2.38	-0.38	-1.55	-0.66	-1.21	-1.58	0.13	-0.19	0.19	0	1.39	-1.36	-0.2	-0.64	-1.3	1.48	0.84	1.01	-0.38	-0.01	-0.51	0.59	0.68	0.79	-0.07	-0.08	0.7	-0.09	-0.7	0.3	0.25
LRRC42	-0.34	0.22	-0.77	-1.22	-1.21	-2.47	-1.1	-0.23	-0.85	-0.8	0.05	1.04	0.36	0.21	0.29	1.43	1.11	0.05	0.45	0.11	0.38	0.9	0.3	-0.07	0.35	-0.37	0.29	-0.6	-0.87	-0.65	-0.54
LYSMD2	0.4	0.25	0.39	0.25	-1.21	-0.53	0.45	-1.07	0.17	-0.1	-1.61	0.42	-0.21	1.07	0.25	-1.06	0.13	-0.14	-0.09	-0.91	0	0.33	0.35	-0.75	0.42	-0.55	0.27	0.52	0.86	0.41	0.3
MED7	-0.13	0.15	-0.86	0.14	-1.21	-1.35	0.03	-0.62	-1.38	-0.19	0.12	-0.95	0.06	0.79	-1.05	-0.79	0.98	-1.64	-0.27	-0.36	-0.1	0.97	-0.4	-0.54	-0.71	0.05	0.69	0.43	-1.16	-0.79	-1.14
MUC19	-1.12	-1.43	0.47	0.35	-1.21	0.72	-0.11	0.69	0.49	-0.24	-0.16	-0.58	-0.6	0.1	-0.24	1.17	-0.27	-0.04	0.49	0.01	-0.34	1.06	-0.18	-0.09	0.47	-0.93	-1.41	0.99	-0.71	-0.35	0.53
MYL6	0.26	-0.9	0.61	0.82	-1.21	-0.75	-0.82	-1.59	-0.51	-1.9	1.53	-0.52	0.27	-1.68	-1.56	0.24	1.35	0.31	-0.48	-2.29	-1.78	-1.31	-0.39	-1.01	-0.55	-1.55	-1.24	-0.78	-1.66	-2.67	-0.75
NGEF	-0.76	-0.39	1.06	0.87	-1.21	0.67	1.28	1.72	0.6	1.06	0.18	-0.03	-0.44	-0.25	0.51	0.03	-1.04	-1.84	-1.09	-0.07	0.48	0.23	0.49	0.15	0.21	0.81	0.29	-1.16	-0.26	0.51	0.19
NHLH1	-0.12	0.74	0.64	0.3	-1.21	1.35	0.37	0.89	0.61	-0.03	0.65	1.41	-0.84	0.75	0.67	2.46	-0.37	-0.37	-0.26	-0.53	-1.17	0.56	-0.55	0.02	-0.55	-0.63	-0.64	0.5	1.11	-0.97	-0.13
NLGN1	-1.11	-1.67	-2.29	-2.03	-1.21	1.43	-0.33	0.74	1.23	0.57	-0.48	-0.84	1.1	-0.71	0.36	0.67	-1.16	-1.53	-0.32	0.09	-0.7	-0.37	0.27	0.06	0.66	0.25	1.18	-0.1	0.67	0.13	0.35
NSF	-1.12	-0.58	-2.18	-1.56	-1.21	-1.17	-2.02	-2.27	-1.38	-1.06	0.88	0.32	-0.75	-0.52	-2.29	NA	-0.21	0.68	0.57	0.53	0.13	0.42	1.54	1.02	0.45	0.89	0.95	-0.62	-2.52	-0.5	-0.95
NSG2	-1.09	-0.34	0.21	-1.58	-1.21	-0.33	0.94	0.03	0.12	1.21	0.77	0.34	-0.33	-0.92	0.32	-1.09	0.53	0.33	0.28	-0.16	0.91	1.13	0.84	-0.06	1.08	0.57	1.81	-1.11	0.48	0.64	-0.58
OR8U1	-0.32	-1.1	-0.17	-0.94	-1.21	-0.84	0.02	-0.75	-1	-0.06	-1.27	-2.5	0.63	-0.67	-0.79	0.09	-0.3	0.7	-0.3	0.79	-0.4	0.18	-0.3	0.5	0.64	0.37	0.03	0.16	-2.57	-1.72	-0.61
PILRB	0.07	0.09	-0.95	-1.26	-1.21	-0.48	-0.04	-1.42	-1.2	-1.14	-0.35	-0.75	-0.47	0.46	0.83	0.54	-0.17	-0.05	-0.07	-0.62	-0.62	0.98	0.4	0.71	0.03	0.16	1.77	-1.2	-0.91	0.27	-0.25
PMEL	-0.65	-1.26	-1.61	-1.27	-1.21	0.24	0.42	0.43	0.64	0.15	-0.89	0.08	-1.16	0.47	0.14	0.41	0.45	0.73	-0.12	0.18	-0.69	-1.54	1.66	0.45	0.99	1.26	0.36	-1.31	0.77	0.03	0.99
RBPJL	-2.6	-0.24	-2.25	-1.04	-1.21	-0.11	0.52	0.86	0.68	-0.67	0.74	0.73	0.3	0.33	-0.29	0.37	-0.11	0.01	0.05	-0.3	-0.35	1.7	1.38	0.91	1.21	0.91	0.87	-0.6	-1.32	-0.21	-2.1
RETN	-0.17	-0.22	-0.38	0.68	-1.21	-1.46	-1.47	-1.38	-0.95	-0.66	-0.39	-0.35	0.26	0.77	-1.45	-0.19	-0.96	-0.57	-1.5	-1.13	-1.31	-1.28	-1.19	0.51	0.02	-0.55	1.23	-0.78	-0.22	0.62	-1.72
RPH3AL	-1.36	-0.34	0.07	-0.28	-1.21	-0.92	-1.22	-1.3	-0.4	-0.29	0	-0.04	-0.11	-0.31	0.24	1.3	1.13	-1.02	0.15	-0.69	-0.12	-1.47	-0.02	0.08	0	-1.39	0.89	0.25	0.84	0.58	-0.66
SIRPD	1.1	-0.28	0.66	0.93	-1.21	0.29	-0.68	1	1.02	0.71	0.28	-0.09	0.16	-0.1	0.27	1.78	1.23	0.16	-0.24	0.34	0.57	0.5	1.17	-0.66	1.47	0.92	1.04	0.24	0.25	1.03	-0.62
SNCAIP	0.38	-0.16	-0.2	0.4	-1.21	1.24	0.37	0.94	1.34	1	-1.14	-1.09	0.87	-0.02	-0.82	0.52	-1.6	-0.73	-0.09	0.03	0.6	0.9	2.23	1.66	1.11	0.92	1.88	0.2	0.53	0.3	0.36
THAP10	0.4	-0.71	1.27	0.8	-1.21	0.19	0.54	1.69	1.39	1	-1.62	-0.88	-1.23	-0.34	1.04	-0.54	2.05	0.87	0.85	-0.03	0.18	0.19	-1.13	-0.25	-2.65	-1.11	-0.66	-1.44	-0.13	0.22	-0.34
TTC32	-0.05	-0.57	-0.44	0.03	-1.21	-1.88	-0.81	-0.8	-0.68	-1.57	-0.5	-0.01	0.32	-0.1	-0.23	0.65	0.29	-0.51	0.15	0.4	0.4	0.74	-0.02	0.3	0.15	-0.75	-1.14	0.2	-0.09	-0.5	-0.65
TUSC5	-0.64	0.05	0.17	-0.82	-1.21	1.2	0.86	1.13	1.04	0.7	-0.1	0.12	0.31	-0.1	-0.46	0.85	-0.66	-0.26	0.28	-0.65	-0.64	0.36	-0.04	-0.62	-1.06	-0.7	-0.79	-0.38	-0.56	-0.83	-0.23
UBXN1	-0.22	-0.15	0.96	-0.43	-1.21	0.81	0.63	-0.49	1.02	1.24	2.09	1.14	1.21	-0.69	1.05	-0.44	-0.15	-0.31	-0.65	-0.58	-1.36	0.29	-0.19	-0.83	-0.26	0.06	-0.36	0.19	1.09	0.25	-0.55
ADIPOQ	0.4	0.04	0.29	0.91	-1.2	-0.4	-0.32	-0.46	-0.29	0.59	0.09	-1.5	0.49	0.06	0.71	1.58	-0.08	-0.28	-0.25	-0.61	-0.44	0.29	-0.4	-0.04	0.05	0.43	0.91	0.45	-2.25	-1.88	-2.68
AHSP	0.6	-0.47	-0.17	0.15	-1.2	0.06	-0.95	0.12	-0.41	-0.58	0.46	0.12	-0.29	0.07	0.12	0.27	0.15	1.75	0.21	1.37	2.07	-0.35	0.56	1.39	0.4	1.25	0.39	-1.33	0.67	0.99	1.18
ARHGAP15	-1.09	-1.93	-2.23	-1.73	-1.2	-1.02	-1.08	-0.82	-1.04	0.03	-0.61	0.14	-0.95	0.46	0.98	-1.12	-0.2	-1.3	-1.28	-0.54	-0.28	-0.27	1.07	-0.39	0.52	0.61	1.6	-0.39	1.35	0.9	0.68
AZIN1	-0.51	-1.23	0.25	-0.59	-1.2	-1.61	-1.79	-1.05	-1.66	-1.56	0.03	-1.9	-2.01	0.29	-0.17	0.02	0.57	-1.12	0.39	-0.36	1.7	-1.03	1.34	0.61	0.44	-0.44	-0.07	-0.84	1.02	0.82	0.98
CCAR2	0.23	-0.12	0.23	0.42	-1.2	0.51	-0.32	1.46	0.83	0.01	-0.24	-0.89	1.04	-0.64	-0.78	-1.34	0.2	2.02	0.1	0.82	0.58	0.25	-0.15	-0.36	0.46	-0.56	0.42	-0.38	-1.46	-1.87	-1.8
CCKAR	0.15	-1.12	0.22	0.02	-1.2	-0.82	-2.65	-1.76	-1.7	-1.54	0.23	0.68	1.43	0.87	-0.3	0.41	-0.12	0.36	-0.27	-0.76	-0.79	-0.73	-0.9	-0.94	0.15	-0.61	-1.62	0.26	0.3	0.56	0.33
CD59	0.35	-1.06	-0.01	-0.29	-1.2	0.91	-0.34	0.53	0.6	1.28	-1.89	-2.76	0.38	-0.44	0.63	1.4	-0.66	-1.29	1.21	-0.82	-0.2	-0.04	0.6	1.21	-0.37	0.5	0.9	0.5	-0.26	-0.2	0.8
CNGA4	-1.15	-2.13	-0.99	-1.52	-1.2	-0.25	-0.44	-0.21	0.07	-0.43	1.69	2.27	0.77	0.58	0.84	-0.32	-0.52	0.94	0.66	0.66	0.29	0	0.59	0.31	0.13	0.06	-0.01	0.41	0.83	0.81	2.03
CTAGE5	-1.17	-1.27	-1.37	-0.72	-1.2	-1.61	-0.72	-0.93	-1.07	-0.13	-1.14	-0.75	-0.58	-0.69	-0.53	-0.36	0.44	-0.06	0.37	0.22	0.38	-0.41	1.58	-0.02	-0.07	-0.26	0.42	-1.04	-0.54	-0.58	-0.92
CYP2S1	-0.2	-0.41	0.48	0.29	-1.2	0.23	0.06	-0.27	-0.81	-0.18	-1.7	-0.71	-0.24	0.67	1.06	0.02	-0.19	1.6	0.74	0.13	0.75	-1.37	-0.41	1.11	0.21	1.42	-0.01	0.09	-0.6	-0.25	-0.02
DENND2A	-0.42	-0.28	-0.39	-0.56	-1.2	-0.9	0.05	-0.54	-0.62	-0.07	-0.73	-0.35	0	0.6	-0.71	-0.31	0.45	-0.16	0.08	0	0.1	0.77	-0.27	-0.16	0.37	-0.5	0.05	-0.6	-1.07	-0.67	-0.81
DGCR2	0.3	-0.21	0.96	1.32	-1.2	1.29	0.38	0.95	0.95	-0.93	-0.71	1.26	-0.29	-0.84	-0.48	1.6	-0.21	-2	-0.39	-1.12	-1.15	0.02	1.1	0.54	1.06	1.42	1.64	0.08	1.12	1.15	-0.88
DGCR8	1	-0.15	0.85	-0.14	-1.2	-0.13	1.83	-0.19	0.8	-0.14	2.77	1.46	-1.75	-0.67	-0.92	-0.63	-2.52	0.16	1.27	0	-0.23	-0.66	0.9	1.42	1.75	0.85	2.12	-1.45	-1.1	0.69	0.77
EFR3A	-1.44	-1.01	-1.34	-0.67	-1.2	0.65	1.28	0.86	-1.3	0.01	-0.07	-0.6	1.25	-1.33	-0.31	1.15	-0.16	-1.47	-0.32	-0.9	-0.95	1.52	-2.98	-1.25	-0.42	0.01	0.36	-1.17	0.7	-0.09	0.43
EIF2B1	-1.61	-0.74	1.02	-1.19	-1.2	1.06	0.4	1.01	0.36	-0.6	-0.87	0.6	0.52	0.85	-0.61	1.18	0.33	0.9	3.04	1.17	1.54	2.47	1.92	1.14	1.58	2.2	1.96	0	-0.15	-0.52	-1.16
FAM83A	0.12	0.4	0.01	0.31	-1.2	-0.92	-1.18	-1.39	-1.67	-0.59	-0.25	0.04	1.19	0.15	-0.61	-0.84	0.68	-0.18	0.01	0.66	0.66	0.42	0.18	0.19	1.06	0.46	1.11	-2.35	-0.16	0.65	0.1
GOLGA3	-1.28	-1.06	-1.35	-1.44	-1.2	1.64	1.34	0.83	1.34	2.03	0.95	1.62	-0.93	-0.74	0.41	0.3	1.8	0.24	1.04	0.1	0.64	-0.61	0.19	-0.18	-0.16	-0.21	0.32	-0.64	1.44	0.81	1.05
GRID1	-0.76	0.81	0.22	-0.58	-1.2	-0.32	-0.12	0.49	-0.13	0.42	-1.2	-0.06	0.29	0.43	0.04	-0.25	-0.03	-0.63	-0.09	0.63	0.16	0.1	-0.06	1.03	0.62	-0.78	-0.42	0.98	0.4	1.7	2.15
HPN	-1.92	-1.61	-0.31	-1.26	-1.2	0.48	0.53	1.22	1.15	-0.36	-0.49	-0.54	0.23	1.25	0.22	-0.11	0.95	0.28	0.04	0.29	-0.7	0.46	0.35	0.29	0.95	0.53	-0.14	1.12	1.01	0.47	0.35
HSPB8	1.85	0.71	1.02	1.76	-1.2	0.5	-0.92	-1.01	-0.8	-1.01	-2.56	-1.04	1.11	-0.12	0.11	-1.16	-1.09	-1.48	0.1	-0.81	-0.6	-1.82	-1.16	-0.53	-0.42	-0.19	0.39	0.45	0.44	1.4	1.11
KDELR2	-1.03	-2.48	-1.85	-2.91	-1.2	-1.08	-2.13	-0.83	-1.36	-1.19	-0.8	-1.03	-0.46	1.28	-0.78	-0.66	-0.09	0.88	0.48	0.8	0.85	-1.04	1.77	0.36	1.13	0.87	0.53	0.15	-0.55	-0.22	0.24
MEF2BNB	-0.42	-0.11	-1.37	-0.94	-1.2	-0.27	-0.35	-0.04	0.69	-1.95	2.23	1.29	0.38	1.11	-0.04	0.73	0.95	2.73	1.01	0.02	-0.09	-0.71	-0.7	0.75	-0.4	0.02	0.07	0.46	0.74	0.6	0.6
OR4C13	-1.13	-0.56	-1.02	-1.14	-1.2	-0.77	-0.23	-0.73	-0.77	-0.01	1	1.38	-1.62	0.89	0.19	-0.03	0.23	0.69	-0.26	-0.38	-0.14	1.31	0.57	0.68	0.18	0.15	-0.7	-0.72	0.41	-0.31	-0.95
OR52D1	-0.47	-1.97	-1.24	-0.64	-1.2	-0.73	-0.48	-0.36	0.31	-0.13	0.14	0.69	2.2	0.1	-0.37	0.21	0.16	-0.81	-0.86	-0.55	-0.16	0.1	0.25	-0.05	-0.44	-1.15	0.02	1.8	-0.16	-1.18	-1.43
OXLD1	-1.26	0.13	-1.25	-0.4	-1.2	0.28	1.15	0.27	1.36	1.01	-0.08	-0.53	0.91	-0.31	-0.52	-1.17	-1.04	-1.3	-0.14	-0.25	-0.04	-0.08	-1.33	-1.04	-0.17	-0.04	-0.34	0	-0.07	-0.53	-0.08
PARL	0.03	-0.98	-1.36	-0.58	-1.2	-1.25	-2.29	-0.28	-1.32	0.38	1.82	-0.22	0.46	0.21	-1.37	1.19	0.98	0.31	-0.02	0.15	0.78	-0.53	0.22	-0.24	-0.31	-0.88	0.23	0.33	-1.22	0.84	-0.62
PLEKHH2	-0.45	-0.1	-0.5	-1.12	-1.2	1.24	0.97	0.78	1.09	0.69	-2.25	-2.08	-0.06	-0.52	0.02	-0.23	1.11	0.38	0.97	-0.79	-0.52	-1	0.12	-0.02	-0.25	-0.48	-0.26	-0.49	-1.01	-0.64	0.36
PSORS1C1	0.73	-1.68	-0.01	0.11	-1.2	-1.62	-0.2	0	-0.8	0.01	-0.05	0.23	1.07	0.02	0.64	0.7	-0.12	1.27	0.48	0.5	0.06	-0.77	1.27	0.31	0.96	1.06	0.81	1.36	-0.17	0.39	-0.25
RAP1A	1.2	-1.66	-0.18	0.7	-1.2	-0.28	-0.32	-0.01	-0.52	-0.34	1.98	0.28	0.61	1.15	-0.09	0.94	-0.38	-1.19	-0.98	-1.56	-0.84	0	1.85	-0.01	0.48	0.94	1.4	-0.06	0.08	0.01	1.31
RBMS3	-0.93	-0.98	-0.37	-0.61	-1.2	0.13	-0.28	0.1	-0.84	-0.83	0.39	0.84	-1.09	0.71	0.64	0.89	-1.17	-1.48	-0.87	-0.62	-0.39	-0.65	0.1	-0.01	-0.29	1.22	-0.99	-0.93	0.1	0.96	1.26
REV1	-0.69	-1.32	-1.5	-0.93	-1.2	-0.21	-1.32	-0.47	-0.4	-3.58	1.13	0.22	-1.22	-2.84	-2.53	-0.72	-1.24	-1.09	-2.4	-0.25	-0.27	1.95	-8.28	-1.33	-0.91	-2.69	-0.26	-0.44	-12.57	0.1	-3.14
RPL36A	-0.3	-0.58	-0.22	-1.56	-1.2	0.63	0.17	-0.47	-0.86	0.09	-0.92	-1.77	2.46	-1.12	-0.03	0.69	1.47	0.73	0.2	0.62	1.39	-1.68	1.41	1.44	0.79	0.51	1.28	-0.3	0.74	0.44	0.87
TMSB10	1.28	-1.33	1.3	1.53	-1.2	0.38	1.31	1	-0.2	0.01	-1.15	-0.98	1.39	-0.46	0.94	0.94	-0.99	-0.94	-0.58	-1.47	-1.43	-0.05	-0.49	0.35	-0.47	-1.01	-0.44	-0.78	0.54	0.01	1.53
TRAPPC6B	-2.53	-0.37	-1.35	-0.16	-1.2	0.08	-0.92	-0.39	-0.92	-0.59	1.19	0.16	-0.75	-0.28	0.38	1.56	-0.82	-0.95	-0.39	-0.16	0.11	-1.33	-0.2	0.09	-0.41	-0.51	-0.68	-1.24	0.48	-0.77	0.15
UTP15	-1.45	0.13	-0.95	-1.13	-1.2	1.06	1.78	0.53	-1.24	0.22	0.15	1.01	1.11	-0.22	-0.26	-0.23	-0.37	-0.26	2.65	2.45	3.5	1.56	-0.6	0.21	-0.96	0.2	0.29	0.27	-0.74	-0.17	1.21
VIPR2	-2.19	0.12	-0.94	-0.84	-1.2	0.89	1.11	1	0.62	2.26	-2.03	-0.97	-0.2	0.51	-0.68	0.12	0.68	0.94	0.1	0.47	0.72	-0.6	0.97	0.13	1.04	1.17	0.12	-0.82	0.91	1.14	0.71
ZNF180	-0.9	0.04	-0.43	0.09	-1.2	-1.37	0.13	0.04	-0.24	-0.72	-1.8	-0.94	0.45	-0.54	0.4	0.51	-1.07	-0.57	-0.22	0.15	-0.53	1.51	-1.63	0.27	-1.42	-1.11	-1.59	-0.8	-0.03	0.53	0.46
ZNF337	1.68	-0.58	0.03	0.67	-1.2	0.85	1.2	2.13	0.58	1.05	-0.3	1.75	0.84	-0.58	0.39	-0.02	-0.43	-0.33	0.38	-0.91	-0.78	-0.98	0.47	0.14	-0.31	-0.82	0.39	0.58	-2.09	0.12	-0.93
AGPAT3	-1.49	-0.89	-1.46	-2.29	-1.19	0.01	0.56	0.29	1.08	-0.19	1.6	1.72	1.15	0.53	1.34	0.23	-0.51	-1.59	-1.07	-1.42	-0.11	0.03	0.9	1.77	0.52	0.5	0.8	0.76	0.58	1.5	1.16
AIMP1	-0.19	-0.01	0.16	-0.15	-1.19	-0.08	1.64	-0.72	-0.06	1.3	1.05	-0.76	0	-0.85	-0.27	1.37	-0.83	-0.16	-0.49	-1.29	-1.23	-0.36	-0.08	-0.5	-1.11	0	-1.82	0.4	-0.45	-1.94	-0.7
ALKBH7	-0.54	-0.91	-1.35	-0.59	-1.19	-0.56	-0.41	-0.77	0.71	-0.69	0	0.13	0.74	0.82	0.57	0.77	-0.49	-0.34	-0.61	-0.71	-1.12	-0.51	-1.36	-0.81	-0.15	-0.24	-0.45	0.3	1.13	2.5	0.47
CCNT1	-0.42	-0.84	-0.9	-1.32	-1.19	0.37	-0.9	-1.67	-0.55	-1.6	1.36	0.47	-0.29	1.76	0.94	1.13	-1.31	-0.62	0.41	0.57	0.88	0.5	-1.18	-0.6	-1.15	-0.3	-1.71	0.47	1.65	1.17	0.55
COL24A1	0.17	-0.26	0.95	0.11	-1.19	-1.49	-2.23	-0.83	-1.58	-1.47	0.09	-0.06	-1.12	0.31	-0.49	0.81	-0.68	-0.21	-0.01	0.05	0.8	-0.24	0.45	0.19	1.32	0.29	0.77	-0.56	0.67	-0.46	0.18
CR2	0.39	-1.62	-0.31	-0.76	-1.19	0.37	-1.35	0.23	-0.03	0.26	NA	0.18	NA	NA	NA	0.06	-1.34	0.54	-0.23	-0.58	-1.33	-0.23	1.28	0.82	0.94	0.66	0.7	-0.18	0.06	0.3	-0.41
DBF4	-1.12	-3.94	-3.25	-0.87	-1.19	-2.93	0.2	-1.59	-2.88	-0.5	0.23	0.13	1.02	-2.65	-3.15	-0.75	0.07	1.15	1.54	-0.27	0.86	-1.91	-2.95	4.37	-3.64	-2.12	-1.56	-5.56	-1.22	0.22	0.06
DHX57	0.95	-0.64	0.32	0.38	-1.19	-1.58	-0.92	-0.15	-1.27	-0.66	2.07	2.14	-0.21	0.66	-0.96	0.05	-0.23	-0.76	0.28	1.07	0.07	0.13	0.94	0.46	1.89	1.07	1.29	-0.12	-0.03	0.07	-1.09
DLK2	-0.76	1.46	0.42	-0.38	-1.19	1.33	2.26	0.4	0.6	0.22	0.94	1.9	0.76	1.18	0.05	0.12	-1.58	-0.81	-0.87	-0.23	-0.31	1	-0.3	0.48	0.31	1.27	0.41	0.38	0.7	-0.03	-0.09
DNAH2	-0.8	0.66	-0.06	-0.63	-1.19	0.79	-0.31	0.69	0.68	-1.16	-1.64	-0.44	-0.49	0.48	0.44	0.74	0.62	0.59	-0.76	0.24	1.06	0.33	-1.33	-0.73	-0.14	-1.4	-2.55	0.54	0.03	0.32	1.87
FURIN	-0.96	-0.52	0.07	-0.39	-1.19	0.64	0.87	0.62	2.26	1.03	-0.13	0.72	0.02	-0.29	0.4	-0.31	0.39	1.39	0.02	-0.23	-1.17	-0.19	1.44	-1.66	-0.43	-1.69	-0.49	-1.25	1.67	-0.37	-0.02
GAL3ST4	-0.98	-0.38	0.2	-0.75	-1.19	0.37	-0.96	-0.19	-0.58	0.09	-0.61	0.71	-0.45	-0.12	-0.8	0.39	-1.18	-0.07	0.62	1.1	0.13	0.08	-0.07	-0.8	0.08	-1.14	-1.38	0.66	0.67	0.02	-0.46
GRN	-1.52	0.19	-0.12	-0.13	-1.19	0.38	0.69	1.26	0.89	0.63	0.71	-0.24	-1.36	0.36	0.44	0.38	1.74	0.7	-0.07	0.03	0.09	0.58	-0.93	-0.09	-1.25	-0.72	-1.1	-0.19	-0.02	-0.43	-0.3
KRTAP5-1	-1.04	-1.25	0.26	-0.51	-1.19	-1.24	-2.18	-1.57	-1.13	-2.44	-0.22	1.03	0.32	1.48	0.78	-1	0.37	0.52	0.48	0.77	0.47	-0.78	0.3	0.87	-0.04	0.25	-0.68	-1.14	1.41	1.78	0.14
LEPRE1	0.75	-0.23	0.8	-0.21	-1.19	-0.34	1.89	0.25	0.17	1.39	0.13	0.12	0.61	-0.07	0.79	1.5	0.08	-0.97	-0.76	-0.86	0.88	1.45	-0.52	-0.76	-0.29	-0.95	-0.61	-0.29	-1.49	0	0.29
MATR3	-1.01	-0.47	-1.22	-0.19	-1.19	-1.03	-1.29	-0.82	-2.09	-1.57	-0.31	-1.85	0.72	-1.25	-0.66	-0.1	-1.27	-1.99	0.69	0.88	-0.9	-0.41	-1.52	-3.09	-0.69	-1.11	-1.63	-0.35	-1.5	-0.09	0.06
NAP1L5	-1.27	-1.28	0.31	-0.7	-1.19	2.94	1.93	2.08	2.03	0.75	1.17	1.04	0.34	0.34	0.79	0.29	-0.1	-0.48	0.05	-0.62	-0.22	-0.88	0.15	0.63	0.27	1.3	0.76	-0.77	-0.72	-0.22	-1.44
[truncated: 15,383 more rows]

## Sheet: H358 RNAseq Candidates
gene_name	shKRASvsC.logFC	shKRASvsC.P.Value	shKRASvsC.adj.P.Val	shKRASvsC.B	SOTOvsC.logFC	SOTOvsC.P.Value	SOTOvsC.adj.P.Val	SOTOvsC.B
CYP26B1	-1.41753	3.37e-05	0.000164017	2.4447	-3.02857	1.07e-06	1.36e-05	5.91531
AK2	-1.12436	6.51e-10	2.13e-08	12.8295	-1.3223	9.15e-10	8.94e-08	12.8083
REXO5	-1.86647	5.16e-05	0.00023766	2.14647	-1.79363	4.47e-05	0.00027982	2.29272
ETV1	-4.0096	5.99e-10	1.99e-08	12.9695	-10.0708	1.88e-06	2.13e-05	3.45852
DBF4	-1.89081	6.01e-09	1.26e-07	10.8415	-2.89054	2.75e-11	1.24e-08	16.147
E2F2	-2.39818	9.42e-07	7.91e-06	5.99589	-3.83516	7.33e-07	1.02e-05	6.30636
ETV7	-1.82072	1.44e-08	2.56e-07	10.0144	-1.21421	0.000122	0.00064122	1.31105
NCAPD2	-1.26854	5.56e-10	1.88e-08	13.135	-1.62779	2.27e-09	1.61e-07	11.8435
ANLN	-1.33049	9.44e-05	0.000397716	1.30972	-3.16233	1.6e-11	1.01e-08	16.9206
BRCA1	-2.92372	5.02e-12	5.32e-10	17.8996	-3.17472	1.41e-08	5.78e-07	10.1672
CD22	-1.71952	4.49e-05	0.000210119	2.26968	-3.07481	0.00049181	0.00204595	0.0993314
TACC3	-2.45261	1.38e-12	2.08e-10	19.2547	-1.92845	2.46e-10	3.86e-08	14.1334
POLA2	-1.69327	8.82e-11	4.46e-09	15.1038	-3.17927	9.71e-07	1.27e-05	6.04061
CCDC88C	-1.2249	2.28e-08	3.68e-07	9.43674	-1.40246	4.91e-07	7.41e-06	6.3926
IL20RA	-1.9365	0.000227292	0.000839363	0.711386	-2.39053	6.32e-06	5.62e-05	4.15245
DEPDC1	-3.88272	1.28e-09	3.62e-08	12.1642	-2.40036	4.28e-10	5.37e-08	13.6492
FAS	-1.06091	8.52e-06	5.08e-05	3.4044	-1.87057	1.9e-06	2.14e-05	5.32583
CD44	-1.18941	2.24e-08	3.64e-07	9.25619	-1.98771	2.11e-07	3.88e-06	7.27183
DEPDC1B	-2.78304	3.33e-08	5.04e-07	9.25044	-2.80119	9.99e-12	8.04e-09	17.1506
SPDL1	-1.70087	4.4e-08	6.31e-07	8.86911	-2.56562	2.19e-09	1.57e-07	12.0383
BARX2	-1.64308	5.16e-05	0.00023766	1.99196	-1.78937	1.9e-06	2.14e-05	5.29956
SCML1	-1.77915	1.22e-08	2.24e-07	10.1827	-2.40442	3.77e-08	1.12e-06	9.22283
CELF2	-1.98743	1.45e-08	2.57e-07	10.0667	-6.00558	5.23e-06	4.83e-05	3.84105
RAD51	-3.16651	7.63e-11	3.98e-09	15.2411	-4.58648	3.64e-08	1.08e-06	9.14233
POLQ	-3.5866	4.33e-07	4.12e-06	6.54226	-3.60027	1.32e-09	1.14e-07	12.3199
NOP58	-1.62721	1.63e-09	4.42e-08	11.9194	-1.21131	2.49e-07	4.39e-06	7.0218
IL17RB	-2.40399	6.85e-08	9.1e-07	8.52956	-3.18931	3.05e-06	3.12e-05	4.92664
DCBLD2	-1.48333	5.37e-09	1.15e-07	10.822	-2.49335	1.08e-08	4.83e-07	10.1954
NDC1	-1.01252	0.000234263	0.000860237	0.0978225	-2.19906	1.99e-09	1.47e-07	12.0624
MCM10	-2.62831	1.46e-08	2.58e-07	10.0733	-5.46348	8.26e-08	1.94e-06	8.35356
MTHFD2	-1.97774	1.68e-11	1.26e-09	16.6644	-1.05533	2.29e-05	0.00016174	2.24647
NGEF	-1.49647	1.14e-08	2.12e-07	10.1646	-1.26205	5.94e-06	5.34e-05	3.91069
ASPM	-2.4688	9.14e-07	7.72e-06	5.89596	-1.91584	3.37e-08	1.03e-06	9.12672
STAG3	-1.9107	1.8e-09	4.79e-08	12.1309	-1.68685	2.61e-08	8.63e-07	9.46181
PRR11	-2.44729	4.57e-13	9.93e-11	20.3554	-1.722	1.84e-07	3.51e-06	7.31401
RNF126	-1.348	7.52e-10	2.4e-08	12.746	-1.35084	1.44e-06	1.72e-05	5.33322
TCOF1	-1.23992	8.89e-10	2.73e-08	12.5442	-2.93027	7.15e-12	7.26e-09	17.7175
ATP2B1	-1.86543	1.65e-08	2.84e-07	9.69612	-1.80568	3.26e-09	2.12e-07	11.5457
TRIP13	-1.28492	1.65e-07	1.88e-06	7.24401	-3.18248	1.94e-10	3.55e-08	14.435
SMC1A	-1.11286	1.29e-08	2.35e-07	9.8024	-1.84465	3.85e-11	1.43e-08	16.0341
HMMR	-3.66851	1.23e-09	3.53e-08	12.2251	-2.09193	3.3e-08	1.02e-06	9.17677
PVR	-1.05828	1.93e-08	3.21e-07	9.41064	-2.14811	2.44e-10	3.85e-08	14.1893
TP63	-1.1409	8.48e-05	0.000362446	1.25006	-1.82482	3.37e-06	3.38e-05	4.43199
DHRS9	-3.78627	0.00036827	0.00126247	0.18235	-2.66155	2.1e-05	0.00015078	3.05896
TIPIN	-1.47395	2.06e-05	0.000107578	2.76751	-2.96594	8.31e-09	4.03e-07	10.6723
GTSE1	-2.26796	8.25e-09	1.63e-07	10.635	-2.6122	7.55e-08	1.82e-06	8.49603
MOCOS	-2.68297	1.43e-09	3.97e-08	12.3607	-1.36209	0.00033244	0.00147948	0.0169987
WDR62	-2.03054	9.07e-06	5.35e-05	3.8013	-3.23807	8.72e-09	4.17e-07	10.6545
MCM6	-1.72866	8.39e-10	2.63e-08	12.753	-4.24011	4.29e-09	2.55e-07	11.342
SPAG5	-2.28433	1.93e-10	8.07e-09	14.3471	-2.29709	5e-10	6.01e-08	13.4854
PAG1	-1.19124	1.1e-07	1.33e-06	7.80001	-1.36492	2.03e-07	3.76e-06	7.32479
UBE2T	-1.45983	8.9e-08	1.12e-06	7.8858	-3.33059	4.25e-11	1.48e-08	15.8042
IL4R	-1.12076	8.81e-07	7.49e-06	5.70471	-1.20981	2.22e-05	0.00015785	2.46696
POLD3	-1.0407	3.8e-05	0.000181976	1.77746	-1.62743	3.65e-06	3.62e-05	4.37196
SMC1B	-2.46012	1.52e-10	6.64e-09	14.5829	-1.92604	8.04e-08	1.91e-06	8.47887
SP140	-2.37026	1.39e-07	1.63e-06	7.85932	-1.8275	0.00011933	0.00063045	1.41138
KIF22	-1.55844	4.74e-11	2.69e-09	15.6752	-2.03166	2.71e-10	4.16e-08	14.0951
PUM3	-1.15034	2.41e-08	3.85e-07	9.11791	-1.56099	5.59e-08	1.48e-06	8.65117
RBL1	-1.2557	1.91e-05	0.00010098	2.89401	-3.24664	3.34e-09	2.16e-07	11.5975
NDC80	-2.83867	4.02e-09	8.99e-08	11.3371	-2.50845	6.92e-10	7.76e-08	13.1775
ME2	-1.27113	4.23e-07	4.03e-06	6.45694	-1.18151	7.44e-07	1.03e-05	6.01632
AKR1B1	-1.64788	6.35e-10	2.09e-08	13.0015	-1.69166	2.43e-08	8.25e-07	9.57669
ORC1	-1.91633	1.94e-07	2.14e-06	7.50222	-3.64894	6.82e-07	9.61e-06	6.36825
RAD54L	-2.41531	6.82e-09	1.4e-07	10.8172	-4.11134	1.04e-08	4.68e-07	10.4659
LAT2	-3.21078	7.19e-08	9.42e-07	8.50034	-2.64432	2.93e-06	3.03e-05	4.96398
TMPRSS11E	-2.06008	3.39e-10	1.27e-08	13.728	-1.18859	9.43e-05	0.0005169	0.914239
AURKA	-2.36906	6.49e-12	6.21e-10	17.7082	-2.51253	1.29e-09	1.12e-07	12.5282
TPX2	-3.02777	2.81e-14	1.51e-11	23.0328	-2.42287	3.16e-11	1.32e-08	16.2333
SMOX	-2.31448	8.85e-11	4.46e-09	15.116	-1.8326	1.16e-08	5.04e-07	10.3739
FUS	-1.21409	2.2e-10	8.87e-09	13.9723	-1.3394	1.27e-08	5.39e-07	10.0437
FXYD5	-1.16238	2.88e-09	6.9e-08	11.286	-1.37334	2.16e-08	7.64e-07	9.52876
BIRC5	-3.14176	3.76e-15	3.41e-12	24.9567	-2.36605	3.95e-12	5.15e-09	18.3026
OTUB2	-1.96188	4.97e-10	1.72e-08	13.3974	-2.59978	4.92e-09	2.79e-07	11.2339
TFAP4	-1.65311	8.7e-07	7.41e-06	5.90682	-1.67117	3.27e-06	3.3e-05	4.63346
KIF4A	-3.00145	1.05e-10	5.1e-09	14.9411	-2.00798	1.69e-08	6.43e-07	9.87485
ITGA6	-2.49149	6.95e-11	3.69e-09	15.2825	-3.33721	3.35e-11	1.35e-08	16.1851
MAP3K20	-1.36983	1.46e-08	2.58e-07	9.76243	-2.03321	1.68e-09	1.32e-07	12.2698
ORC6	-2.7199	7.58e-13	1.36e-10	19.8493	-3.66859	6.98e-10	7.76e-08	13.0717
RGS17	-2.53975	1.18e-05	6.69e-05	3.55719	-2.08657	1.77e-05	0.00013146	3.22976
SEMA6A	-1.91771	2.94e-06	2.08e-05	4.85595	-2.21327	3.55e-06	3.53e-05	4.78086
WDR76	-1.9105	7.44e-08	9.67e-07	8.47164	-3.6592	4.21e-07	6.67e-06	6.83122
CLSPN	-1.40865	3.24e-06	2.26e-05	4.47441	-5.09935	3.51e-07	5.79e-06	7.03479
CDC45	-2.47507	2.51e-12	3.21e-10	18.6509	-5.29859	5.74e-06	5.2e-05	4.30307
CDC6	-2.6976	1.21e-12	1.92e-10	19.3519	-4.68441	3.37e-10	4.65e-08	13.7519
TMEM38B	-1.56182	4.43e-07	4.2e-06	6.21157	-1.59401	1.25e-07	2.67e-06	7.90865
CDC7	-2.14099	5.86e-09	1.23e-07	10.9736	-2.60497	1.65e-08	6.35e-07	10.0381
NRP1	-1.33402	9.36e-08	1.17e-06	8.08269	-2.56626	7.54e-09	3.79e-07	10.7117
PRTFDC1	-1.18521	6.07e-06	3.82e-05	3.80217	-1.78619	4.12e-07	6.57e-06	6.85641
RANBP1	-1.42053	4.61e-10	1.62e-08	13.1968	-2.25589	1.3e-08	5.45e-07	10.0891
DERL3	-1.56617	8.64e-06	5.14e-05	3.77352	-1.77433	5.54e-05	0.00033285	1.99177
SH3BP1	-1.00027	1.07e-05	6.14e-05	3.27034	-1.72829	1.56e-06	1.82e-05	5.51801
CENPM	-3.0702	1.18e-13	4.31e-11	21.5847	-3.49778	3.86e-10	5.03e-08	13.4526
MCM5	-1.47264	5.36e-08	7.42e-07	8.54695	-3.45799	2.33e-08	7.98e-07	9.60384
DESI1	-1.4564	8.47e-10	2.64e-08	12.6317	-1.04423	4.23e-07	6.69e-06	6.57612
COCH	-1.61236	1.69e-05	9.1e-05	2.96613	-1.61019	8.18e-08	1.93e-06	8.45271
POLE2	-2.74532	3.44e-09	7.9e-08	11.4851	-3.54423	1.85e-07	3.52e-06	7.65434
PYGL	-1.49554	2.73e-11	1.83e-09	16.1786	-1.602	1.9e-08	6.99e-07	9.66357
CDKN3	-3.07092	2.97e-13	7.34e-11	20.7647	-2.3422	3.78e-10	4.99e-08	13.7658
PLEK2	-1.97293	6.58e-12	6.23e-10	17.6737	-2.03681	1.06e-07	2.33e-06	8.17169
ASB2	-3.44842	2.03e-06	1.51e-05	5.20561	-8.50685	7.71e-07	1.06e-05	3.92715
CEP128	-1.8244	0.000106586	0.000440151	1.44644	-2.52276	6.62e-08	1.66e-06	8.63343
HIF1A	-1.39436	3.75e-06	2.55e-05	3.88667	-2.07878	4.21e-07	6.67e-06	6.35242
MTHFD1	-1.12197	3.12e-10	1.18e-08	13.6449	-1.61067	4.34e-08	1.23e-06	8.79123
VRK1	-2.29415	4.48e-11	2.56e-09	15.7959	-2.89621	3.9e-08	1.14e-06	9.1677
EMC9	-1.32687	2.05e-09	5.27e-08	11.7915	-1.38285	1.28e-07	2.72e-06	7.89405
MYBL2	-3.41124	3.19e-13	7.76e-11	20.5189	-4.01363	1.72e-10	3.33e-08	14.5404
SLCO4A1	-3.13987	5.26e-12	5.43e-10	17.8661	-3.76778	7.34e-08	1.78e-06	8.56929
CDC25B	-2.38775	1.1e-10	5.23e-09	14.7639	-1.31317	3.13e-07	5.28e-06	6.76583
ARFRP1	-1.2385	5.96e-09	1.25e-07	10.7173	-1.16765	6.58e-08	1.65e-06	8.52991
NOP56	-1.33817	7.41e-10	2.38e-08	12.6775	-2.59953	4.18e-10	5.3e-08	13.6026
JAG1	-2.39388	1.79e-12	2.49e-10	18.9838	-3.13879	1.21e-10	2.58e-08	14.8701
E2F1	-2.4507	3.11e-09	7.37e-08	11.5985	-5.23481	4.07e-07	6.51e-06	6.89053
FAM83D	-2.32509	1.33e-08	2.4e-07	10.0833	-2.6735	2.88e-11	1.24e-08	16.3146
RBFA	-1.18911	1.16e-08	2.15e-07	10.0265	-1.27438	5.63e-06	5.13e-05	4.19601
RBBP8	-1.21237	7.49e-07	6.54e-06	5.86617	-1.35832	2.83e-06	2.94e-05	4.71652
VSIG1	-1.64827	4.86e-05	0.000225128	1.95734	-2.19903	2.61e-06	2.75e-05	5.04338
SMS	-1.46854	3.39e-08	5.1e-07	8.81191	-1.66349	3.03e-09	2e-07	11.6067
SRPX2	-1.21258	4.32e-09	9.53e-08	11.0695	-2.99993	1.2e-10	2.58e-08	14.9147
SLC25A15	-1.4259	1.11e-09	3.23e-08	12.4617	-1.08819	5.82e-06	5.25e-05	3.99559
SLC7A5	-1.39689	9.51e-12	7.97e-10	17.1863	-1.33954	5.51e-06	5.05e-05	3.56706
GABPB1	-1.67425	2.37e-07	2.5e-06	7.04598	-1.02481	2.98e-07	5.06e-06	7.01569
OIP5	-2.66194	3.85e-11	2.32e-09	15.8983	-2.01762	2.25e-07	4.06e-06	7.44451
PLAT	-2.24669	7.19e-11	3.79e-09	15.193	-2.69457	1.19e-09	1.05e-07	12.579
IL7	-1.86804	6.83e-06	4.22e-05	3.95834	-2.12345	5.97e-07	8.65e-06	6.48878
PYCR3	-1.19575	4.48e-08	6.41e-07	8.59511	-1.25839	9.66e-06	7.96e-05	3.3227
ERI1	-1.12235	5.88e-05	0.000265761	1.44234	-1.15109	3.67e-07	5.98e-06	6.80182
SLC39A14	-1.15787	2.33e-09	5.84e-08	11.5566	-1.23215	1.88e-07	3.55e-06	7.38578
TNFRSF10A	-1.6858	3.2e-09	7.5e-08	11.4135	-3.85858	5.69e-09	3.12e-07	11.091
MCM4	-2.00687	5.63e-13	1.18e-10	20.1276	-3.87112	2.85e-09	1.89e-07	11.6522
ASF1B	-1.85821	1.75e-08	2.97e-07	9.88197	-3.78705	2.94e-10	4.37e-08	13.8786
CCNE1	-1.90986	2.04e-05	0.000106584	2.93548	-3.81888	1.32e-05	0.00010235	3.50459
SLC1A5	-2.67003	5.22e-14	2.32e-11	22.5155	-1.15352	3.5e-08	1.05e-06	8.99532
DNAH11	-1.95062	6.65e-10	2.16e-08	13.1026	-1.78982	1.42e-06	1.69e-05	5.5747
ADAP1	-2.08687	6.42e-11	3.46e-09	15.4277	-1.94193	8.56e-06	7.22e-05	3.69257
GRB10	-1.12036	4.05e-08	5.93e-07	8.64728	-1.20319	6.31e-08	1.61e-06	8.5432
STX1A	-1.19047	2.57e-08	4.05e-07	9.26507	-1.25977	4.61e-07	7.09e-06	6.48441
EZH2	-1.58738	9.89e-09	1.88e-07	10.2046	-2.22139	3.38e-10	4.65e-08	13.8871
PLGRKT	-1.31537	1.96e-10	8.17e-09	14.1112	-1.57516	1.4e-07	2.9e-06	7.84651
UBE2S	-2.11733	1.29e-09	3.65e-08	12.4398	-3.35042	2.02e-11	1.12e-08	16.6856
PPIF	-1.55263	1.7e-07	1.92e-06	7.23634	-2.42087	1.16e-08	5.04e-07	10.3593
ABCC3	-1.48553	2.17e-09	5.51e-08	11.8083	-1.38659	2.48e-05	0.00017278	2.38632
MMD	-1.24142	6.83e-05	0.000302115	1.36441	-2.27766	5.95e-08	1.55e-06	8.72291
AREG	-4.50383	1.15e-15	2.1e-12	26.2284	-5.73313	4.51e-10	5.56e-08	13.5961
NEIL3	-3.13249	4.79e-06	3.14e-05	4.39198	-3.57203	3.39e-08	1.03e-06	9.27603
NSD2	-1.26428	3.89e-10	1.42e-08	13.4655	-1.64832	1.07e-09	9.72e-08	12.6295
NCAPG	-3.26678	3.36e-09	7.81e-08	11.2993	-3.47303	5.28e-12	6.47e-09	17.8601
NECTIN1	-1.45063	4.36e-09	9.58e-08	11.0899	-1.89544	2.84e-11	1.24e-08	16.3475
SYT10	-1.74885	5.64e-05	0.00025648	2.03465	-3.12439	0.00025324	0.0011822	0.716283
MAGOHB	-1.58101	2.24e-08	3.64e-07	9.48332	-1.0091	2.24e-05	0.00015871	2.75102
FOXM1	-2.79298	2.66e-12	3.3e-10	18.5787	-2.4303	6.49e-11	1.95e-08	15.5284
RAD51AP1	-1.48218	1.45e-06	1.14e-05	5.33489	-2.92924	1.9e-07	3.58e-06	7.63254
RFC5	-1.63611	1.06e-10	5.1e-09	14.8571	-2.49759	3.91e-08	1.14e-06	9.10853
CDCA3	-3.52362	5.58e-10	1.88e-08	13.1387	-3.18533	2.51e-11	1.15e-08	16.2611
FBXO5	-1.46131	7.5e-05	0.000326201	1.33393	-2.47281	8.22e-08	1.94e-06	8.43718
MCM3	-1.14517	2.8e-09	6.74e-08	11.4645	-3.20957	5.73e-09	3.13e-07	10.9734
BAG2	-1.11473	3.45e-06	2.38e-05	4.00575	-1.46462	9.67e-07	1.26e-05	5.91424
ASCC3	-1.25965	5.47e-07	5.02e-06	5.96991	-1.31009	1.82e-09	1.38e-07	12.1496
VEGFA	-1.71869	2.96e-08	4.57e-07	8.82469	-2.67299	1.11e-09	9.93e-08	12.581
SLC29A1	-1.52577	2.56e-06	1.86e-05	4.91385	-2.31253	9.89e-09	4.55e-07	10.5044
KIF20A	-2.17251	6.43e-08	8.64e-07	8.56778	-1.96564	1.97e-08	7.13e-07	9.68672
LMNB1	-2.55236	1.03e-08	1.96e-07	10.3025	-2.56106	3.97e-12	5.15e-09	18.3021
PDE4D	-1.57122	3.67e-05	0.00017641	2.28964	-1.43201	3.23e-05	0.00021436	2.27641
BRIX1	-1.23452	1.97e-08	3.25e-07	9.25752	-1.64788	6.63e-10	7.59e-08	13.1812
STC2	-3.33022	2.7e-14	1.49e-11	23.1749	-1.77488	9.46e-06	7.83e-05	3.24771
SMC4	-1.82144	1.89e-09	4.96e-08	11.8861	-2.27525	1.32e-11	9.32e-09	17.1144
PFKFB4	-1.084	3.48e-07	3.44e-06	6.6675	-2.72794	9.58e-08	2.16e-06	8.22998
HES1	-1.43085	3.07e-11	1.97e-09	16.0274	-1.36808	2.55e-06	2.7e-05	4.70448
GNB4	-1.0982	0.000194372	0.000733212	0.463232	-2.18395	2.91e-07	4.97e-06	7.16016
MAPKAPK3	-1.13402	5.44e-09	1.16e-07	10.6945	-1.15963	2.99e-06	3.07e-05	4.41862
CENPA	-3.37966	3.16e-12	3.77e-10	18.3776	-2.6633	5.2e-10	6.19e-08	13.4181
PPM1G	-1.10968	6.72e-07	5.96e-06	5.59984	-1.3922	3.14e-08	9.76e-07	9.08921
LOXL3	-1.30578	9.15e-05	0.000387546	1.34069	-2.44265	1.37e-05	0.00010604	3.46331
CCDC88A	-1.70664	6.61e-08	8.84e-07	8.46494	-1.91427	1.61e-05	0.00012094	2.96379
FHL2	-1.91748	2.33e-12	3.02e-10	18.6671	-2.80894	8.45e-09	4.06e-07	10.6868
HPCAL1	-1.22545	2.69e-08	4.22e-07	9.02058	-2.33752	1.65e-09	1.31e-07	12.248
ODC1	-1.49953	2.89e-11	1.88e-09	16.0952	-1.21888	9.17e-08	2.1e-06	8.02832
SRSF7	-1.13958	3.76e-10	1.38e-08	13.3617	-1.22478	1.72e-08	6.51e-07	9.76622
WIPF1	-3.54579	0.000335564	0.00116722	0.374061	-5.88035	6.12e-05	0.00036102	1.11912
PNO1	-1.52786	2.8e-11	1.86e-09	16.1381	-1.77854	3.51e-07	5.79e-06	6.8306
FARSB	-1.21753	1.97e-08	3.26e-07	9.40982	-2.08991	2.01e-09	1.48e-07	12.0708
ERRFI1	-1.76321	1.45e-10	6.4e-09	14.4369	-1.69287	3.34e-06	3.36e-05	4.28378
ARHGEF2	-2.11793	6.4e-12	6.19e-10	17.7073	-1.01279	2.7e-07	4.69e-06	6.89815
SRM	-1.38244	8.18e-07	7.04e-06	5.40068	-2.19353	9.91e-10	9.4e-08	12.7962
UCHL5	-1.60816	1.39e-07	1.62e-06	7.29381	-1.7824	3.64e-10	4.86e-08	13.8017
AGMAT	-2.24932	6.16e-07	5.56e-06	6.41063	-2.12576	1.77e-06	2.03e-05	5.40558
TTF2	-1.03823	2.06e-07	2.25e-06	7.0839	-2.52418	1.01e-09	9.51e-08	12.802
AIRIM	-1.18255	6.98e-07	6.15e-06	5.71763	-1.25105	2.56e-07	4.49e-06	7.21624
CDC20	-2.82126	1.01e-11	8.27e-10	17.278	-2.38818	1.87e-10	3.5e-08	14.4505
NEK2	-3.66902	8.78e-12	7.53e-10	17.1733	-1.56898	2.36e-07	4.22e-06	7.22336
CENPF	-2.3627	5.97e-12	5.95e-10	17.7929	-2.12502	9.4e-08	2.14e-06	8.00111
MUC5B	-3.38451	1.93e-12	2.65e-10	18.5831	-1.29341	4.94e-07	7.43e-06	6.36732
KIF14	-2.81203	2.94e-06	2.08e-05	4.76245	-2.26716	2.03e-07	3.77e-06	7.39395
ABCG2	-3.36171	5.44e-06	3.48e-05	4.22829	-1.81433	0.00043352	0.00184069	0.0186028
CTNNAL1	-1.52376	2.39e-10	9.47e-09	13.9739	-2.00653	4.83e-10	5.88e-08	13.5298
PHF19	-2.14296	5.68e-13	1.18e-10	20.1344	-1.71131	3.04e-08	9.56e-07	9.24823
OGFRL1	-2.58678	4.2e-13	9.59e-11	20.4291	-1.73215	1.78e-06	2.04e-05	4.98037
HELLS	-1.08355	1.42e-05	7.82e-05	2.89381	-3.72051	1.06e-07	2.33e-06	8.18324
GOT1	-1.72142	3.55e-11	2.19e-09	15.9462	-1.88558	1.11e-08	4.89e-07	10.401
CD274	-2.72785	1.34e-09	3.75e-08	12.3964	-2.2044	6.05e-07	8.74e-06	6.41258
MTHFD1L	-1.42399	8.89e-11	4.47e-09	14.9674	-1.72965	8.99e-07	1.19e-05	5.87586
MASTL	-2.01333	3.36e-09	7.81e-08	11.4358	-2.44646	1.96e-09	1.46e-07	12.1287
EXOSC8	-1.35759	1.07e-06	8.71e-06	5.32128	-1.65853	1.46e-08	5.87e-07	10.0933
TMPO	-1.99414	2.28e-07	2.43e-06	7.00628	-2.61611	1.71e-12	3.71e-09	19.1286
DUSP4	-1.75061	4.08e-12	4.6e-10	18.1061	-3.29133	6.25e-10	7.26e-08	13.2741
NCAPH	-2.55202	1.47e-11	1.13e-09	16.9056	-2.74199	2.86e-08	9.14e-07	9.39447
KIF18A	-2.31802	0.000200778	0.000754104	0.862349	-1.85816	7.79e-09	3.87e-07	10.7791
TMEM156	-2.12119	2.42e-13	6.51e-11	20.99	-2.47695	1.09e-06	1.39e-05	5.49761
GPSM2	-1.46618	8.62e-06	5.13e-05	3.50472	-1.52706	8.04e-09	3.95e-07	10.6502
CCDC18	-1.54654	1.09e-05	6.23e-05	3.31013	-2.28845	2.12e-09	1.53e-07	12.0129
ZWINT	-2.36786	3.36e-11	2.12e-09	16.0261	-2.81257	3.96e-09	2.4e-07	11.432
ADGRE5	-1.1923	8.16e-09	1.62e-07	10.3172	-1.44867	1.04e-07	2.31e-06	7.95542
CENPK	-2.74955	5.75e-12	5.8e-10	17.8126	-3.05816	1.39e-08	5.73e-07	10.2063
CDK2	-1.15188	1.49e-05	8.15e-05	3.02111	-2.64026	1.17e-10	2.57e-08	14.9405
TUBA1B	-1.00443	2.38e-09	5.92e-08	11.4161	-3.29567	9.43e-13	2.75e-09	19.7378
STIL	-1.94517	3.45e-08	5.18e-07	9.20805	-2.82394	5.74e-10	6.7e-08	13.3589
HJURP	-2.5592	5.56e-10	1.88e-08	13.3003	-3.4032	2.16e-11	1.12e-08	16.5482
NDUFAF4	-1.2461	1.06e-07	1.29e-06	7.79662	-1.88424	4.55e-07	7.02e-06	6.77711
G0S2	-2.86623	5.04e-12	5.32e-10	17.9676	-5.05738	2.4e-05	0.00016852	2.61571
EXOSC9	-1.06882	2.57e-07	2.68e-06	6.70481	-1.56544	4.42e-08	1.25e-06	8.9722
TOX2	-3.08513	1.56e-09	4.26e-08	12.2725	-4.21904	5.83e-08	1.52e-06	8.37234
EEF1E1	-1.52513	1.66e-07	1.88e-06	7.10584	-1.67623	5.29e-06	4.87e-05	4.28922
EREG	-4.11481	3.59e-10	1.33e-08	13.6488	-4.33497	1.27e-08	5.39e-07	10.2215
SOX21	-2.58565	2.14e-06	1.59e-05	5.1784	-1.92656	1.45e-06	1.73e-05	5.5611
HROB	-1.91103	1.29e-05	7.2e-05	3.44627	-2.91369	1.85e-06	2.1e-05	5.41375
SLC25A19	-1.10498	1.4e-07	1.63e-06	7.52375	-3.7212	2.32e-07	4.17e-06	7.43787
MIR9-1HG	-1.56728	1.05e-10	5.1e-09	14.8994	-1.71279	8.81e-06	7.38e-05	3.68238
SLC2A4RG	-1.28024	3.93e-07	3.81e-06	6.17033	-1.02134	3.39e-08	1.03e-06	9.07456
SH2D3A	-1.26539	2.2e-09	5.58e-08	11.6494	-1.43908	4.69e-05	0.00029101	1.80341
FOXA2	-2.9714	7.7e-12	6.81e-10	17.5294	-5.94232	3.62e-10	4.86e-08	13.2135
MCM8	-2.15661	2.41e-09	5.97e-08	11.7726	-3.28042	1.02e-08	4.61e-07	10.495
XRCC3	-1.99752	9.72e-09	1.86e-07	10.461	-3.59488	7.52e-09	3.79e-07	10.8157
BCL2L12	-1.06457	1.27e-07	1.5e-06	7.532	-1.66888	4.84e-09	2.76e-07	11.2456
SBDS	-1.09473	1.02e-08	1.94e-07	9.97077	-1.19523	1.31e-06	1.6e-05	5.38438
TRAP1	-1.09773	1.37e-08	2.46e-07	9.69181	-1.0478	1.28e-07	2.72e-06	7.66412
DLGAP5	-2.47018	2.26e-08	3.66e-07	9.64416	-2.04996	1.15e-09	1.02e-07	12.6283
AUNIP	-2.0686	1.67e-07	1.9e-06	7.66123	-4.01309	1.32e-07	2.76e-06	7.69986
PKMYT1	-3.27933	4.95e-11	2.75e-09	15.4317	-4.73911	2e-07	3.73e-06	7.5764
PAICS	-1.15389	1.16e-08	2.15e-07	9.81004	-2.09245	8.26e-13	2.75e-09	19.8646
CDC42EP1	-1.94566	2.04e-11	1.44e-09	16.4941	-1.82003	4.36e-06	4.19e-05	4.1045
LIF	-1.42297	1.51e-08	2.65e-07	9.75822	-2.9806	9.59e-11	2.26e-08	15.131
RIBC2	-2.16796	4.97e-06	3.23e-05	4.35816	-3.34402	1.33e-06	1.62e-05	5.65815
STRIP2	-3.34539	2.48e-07	2.6e-06	7.09616	-2.44589	0.00037272	0.00162676	0.357801
KNSTRN	-1.48904	2.11e-10	8.57e-09	14.1266	-2.44148	9.64e-10	9.18e-08	12.8492
DUT	-1.29993	3.43e-11	2.14e-09	15.8693	-1.62233	6.03e-08	1.56e-06	8.47413
E2F8	-2.0828	1.03e-06	8.47e-06	5.87726	-2.79373	1.14e-07	2.47e-06	8.1317
PIMREG	-1.60116	5.94e-07	5.38e-06	6.21556	-3.18513	7.32e-10	7.83e-08	13.0342
EGLN3	-1.35652	3.41e-08	5.13e-07	8.99146	-3.39985	9.87e-06	8.09e-05	3.52135
RNASE1	-1.03345	9.55e-05	0.000401166	1.17337	-1.64956	0.00022832	0.00108277	0.589506
SGO1	-3.24987	2.3e-09	5.78e-08	11.8454	-2.91063	1.29e-08	5.43e-07	10.1601
TOMM40	-1.76187	5.78e-08	7.9e-07	8.14461	-2.33068	4.23e-10	5.33e-08	13.6284
CEP85	-1.13782	2.88e-07	2.94e-06	6.84757	-1.69694	1.75e-07	3.4e-06	7.50858
ZNF331	-1.48191	9.07e-09	1.75e-07	10.428	-1.39525	1.45e-07	2.96e-06	7.7628
GINS2	-2.72213	2.25e-14	1.28e-11	23.3252	-4.8327	9.87e-09	4.55e-07	10.5117
HAUS8	-1.11463	0.000219826	0.000814593	0.352198	-2.77792	7.61e-08	1.83e-06	8.50484
PSMC3IP	-1.41171	6.72e-08	8.96e-07	8.37008	-3.04901	1.32e-06	1.61e-05	5.72142
ANO1	-1.32021	1.9e-05	0.000100606	2.77641	-2.20616	6.09e-08	1.57e-06	8.71816
TOP2A	-2.4155	7.45e-09	1.5e-07	10.6138	-2.44971	5.2e-11	1.7e-08	15.709
KHDRBS3	-2.02177	5.85e-10	1.95e-08	13.1769	-2.43206	8.99e-08	2.07e-06	8.36537
BRME1	-1.45752	0.000181847	0.000692398	0.881231	-2.57575	6.21e-07	8.91e-06	6.46721
PPARG	-2.30653	6.76e-12	6.33e-10	17.6738	-2.43538	8.04e-06	6.85e-05	3.9479
NUP210	-1.65823	3.67e-10	1.36e-08	13.6243	-1.72714	3.94e-06	3.85e-05	4.11829
SCLY	-1.89401	2.37e-08	3.8e-07	9.54833	-2.65186	5.99e-07	8.67e-06	6.44058
FIGNL1	-1.50502	4.17e-06	2.79e-05	4.41975	-2.3073	9.65e-08	2.17e-06	8.22514
PCNA	-1.25248	3.7e-09	8.36e-08	11.0196	-3.10741	2.57e-08	8.56e-07	9.39211
RFC3	-2.64522	1.26e-09	3.59e-08	12.3965	-3.52995	6.3e-09	3.33e-07	10.98
MORC4	-1.79808	2.36e-09	5.88e-08	11.8131	-1.02402	4.85e-06	4.55e-05	4.1507
LRRCC1	-1.06634	1e-05	5.82e-05	3.2963	-1.41308	7.71e-06	6.6e-05	3.69466
EIF2S1	-1.02304	4.51e-09	9.84e-08	10.8411	-1.18944	9.84e-09	4.55e-07	10.3431
CCNB1	-2.46477	2.07e-12	2.76e-10	18.8396	-2.45677	7.99e-11	2.03e-08	15.3057
IRAK2	-2.25925	8.95e-11	4.49e-09	15.1062	-2.5002	1.39e-08	5.72e-07	10.1962
IL15RA	-1.677	6.83e-11	3.64e-09	15.3433	-1.96452	0.00036044	0.00158205	0.177742
DDB2	-1.63543	2.76e-08	4.31e-07	9.34902	-1.38939	2.02e-05	0.00014573	2.75644
YARS1	-1.70964	1.35e-12	2.05e-10	19.2442	-1.12193	1.78e-07	3.43e-06	7.46955
PHC2	-1.1164	2.36e-09	5.88e-08	11.5105	-1.41935	2.18e-10	3.68e-08	14.2802
CDCA8	-2.74559	2.84e-11	1.87e-09	16.2487	-2.62591	2.37e-11	1.15e-08	16.4974
RNF138	-1.96277	2.49e-07	2.61e-06	7.12287	-1.09419	6.22e-06	5.56e-05	3.90785
FHOD3	-1.34985	4.28e-10	1.52e-08	13.4164	-4.30513	1.6e-10	3.25e-08	14.3915
CLDN10	-2.19462	5.83e-13	1.2e-10	20.1154	-1.4129	0.00011865	0.00062774	0.908521
ETS1	-1.01048	3.68e-06	2.51e-05	4.13966	-1.02037	4.27e-05	0.00026965	1.64236
WDR36	-1.01399	5.25e-06	3.37e-05	3.89787	-1.15564	7.3e-09	3.71e-07	10.7044
C9orf40	-1.76138	4.87e-11	2.71e-09	15.6164	-3.35815	3.47e-09	2.21e-07	11.4466
PSAT1	-3.13971	2.78e-15	3.14e-12	25.4226	-3.09988	2.97e-10	4.37e-08	14.0153
NT5E	-2.45186	3.05e-15	3.14e-12	25.3199	-3.50611	7.44e-11	2e-08	15.3633
TROAP	-2.59036	2.22e-11	1.54e-09	16.4904	-1.81721	2.44e-07	4.32e-06	7.20802
ESPL1	-2.90288	5.33e-09	1.14e-07	11.0503	-2.8513	7.88e-10	8.25e-08	13.0489
LTV1	-1.32016	2.66e-07	2.75e-06	6.79653	-1.26273	2.08e-06	2.3e-05	5.19399
RNASEH2B	-1.39135	2.97e-09	7.09e-08	11.3323	-1.10187	1.31e-05	0.00010209	3.12822
BORA	-1.66052	1.51e-07	1.74e-06	7.69001	-1.82855	1.44e-07	2.96e-06	7.86318
SRSF1	-1.71814	4.23e-06	2.83e-05	3.89175	-1.21779	1.03e-08	4.66e-07	10.338
BRIP1	-1.36372	2.23e-05	0.000115026	2.53384	-3.51382	1.84e-07	3.5e-06	7.64122
DSCC1	-2.11301	1.03e-07	1.27e-06	7.96269	-5.23907	7.15e-08	1.75e-06	8.55205
MYC	-2.19091	2.09e-09	5.34e-08	11.6772	-3.35245	1.56e-10	3.2e-08	14.5923
ARHGEF39	-2.01105	3.84e-07	3.74e-06	6.78672	-2.07935	1.7e-08	6.46e-07	10.0112
HMGA1	-2.24014	3.92e-15	3.41e-12	25.0983	-2.01864	1.64e-09	1.31e-07	12.0814
TCF19	-2.10943	1.27e-09	3.59e-08	12.4849	-4.58127	6e-08	1.56e-06	8.76689
FGFBP1	-2.59013	3.4e-09	7.85e-08	11.5089	-5.27809	3.75e-10	4.97e-08	13.5109
GGH	-1.17873	1.42e-08	2.53e-07	9.7173	-1.57606	2.24e-07	4.04e-06	7.32291
KIF23	-2.50399	7.54e-12	6.8e-10	17.56	-2.93945	6.62e-13	2.58e-09	19.9244
KNL1	-2.93301	1.84e-07	2.05e-06	7.57055	-2.51241	3.33e-10	4.63e-08	13.9028
ADCY3	-1.70665	4.31e-09	9.53e-08	11.1412	-2.83631	1.99e-07	3.71e-06	7.41437
PNPT1	-1.79705	2.37e-10	9.4e-09	14.038	-1.36181	5.63e-06	5.13e-05	3.85245
STAMBPL1	-2.96306	2.49e-07	2.61e-06	7.27545	-2.22781	5.66e-07	8.29e-06	6.56857
KIF11	-2.58433	5.14e-09	1.11e-07	11.0765	-2.53953	6.12e-11	1.88e-08	15.5823
DUSP5	-2.01253	1.33e-08	2.41e-07	10.1397	-4.0889	2.54e-09	1.74e-07	11.6969
CEP55	-2.71644	5.28e-08	7.33e-07	8.81175	-2.78012	4.08e-10	5.29e-08	13.6711
BARD1	-1.02592	5.97e-05	0.000269182	1.38932	-1.93195	7.55e-07	1.04e-05	6.06506
MNS1	-2.9881	9.82e-10	2.95e-08	12.6501	-2.28961	7.81e-06	6.68e-05	4.00118
GPAT3	-3.05371	4.18e-11	2.46e-09	15.8097	-3.19813	8.29e-10	8.48e-08	12.962
PRDM5	-1.75921	0.000349047	0.00120688	0.275163	-1.68068	0.00030029	0.00135893	0.563464
CENPE	-3.17359	1.42e-09	3.95e-08	12.372	-2.31661	2.85e-09	1.89e-07	11.7132
RGS3	-2.10492	4.29e-11	2.48e-09	15.8247	-1.39462	2.8e-07	4.82e-06	6.92723
PHLDA1	-3.20924	6.73e-15	4.92e-12	24.5573	-4.40088	1.35e-13	1.05e-09	21.5086
DUSP6	-3.8985	4.6e-13	9.93e-11	20.265	-9.37717	1.68e-08	6.4e-07	8.51317
GAS2L3	-3.23507	7.97e-09	1.58e-07	10.6206	-2.19803	7.17e-08	1.75e-06	8.5705
FAM222A	-1.73166	0.000100436	0.000418254	1.43018	-3.42251	3.62e-07	5.92e-06	6.89883
SLC7A1	-2.49175	1.49e-13	5.06e-11	21.47	-3.14628	3.62e-09	2.28e-07	11.5189
BRCA2	-2.11412	5.23e-07	4.83e-06	6.46947	-3.28773	8.33e-09	4.03e-07	10.7017
DIAPH3	-2.13781	2.32e-09	5.82e-08	11.8663	-3.43706	5.8e-08	1.52e-06	8.80105
PIF1	-2.1889	4.02e-07	3.88e-06	6.81551	-2.416	8.29e-07	1.13e-05	6.14048
FANCI	-2.19567	6.4e-10	2.1e-08	13.1367	-3.39157	1.1e-09	9.9e-08	12.7011
TICRR	-2.11595	3.49e-06	2.4e-05	4.70207	-3.50702	6.39e-10	7.38e-08	13.1908
MCTP2	-1.04842	0.000240323	0.000880012	0.197033	-1.23663	1.95e-05	0.00014185	2.61274
KATNB1	-1.05209	9.34e-08	1.17e-06	7.8034	-1.04644	4.92e-07	7.41e-06	6.44465
KIFC3	-1.48027	4.2e-11	2.47e-09	15.7418	-1.59895	5.91e-07	8.56e-06	6.21216
COPS3	-1.46604	2.06e-09	5.3e-08	11.7006	-1.19058	1.66e-08	6.36e-07	9.84915
PRELID3A	-1.17086	7.8e-06	4.72e-05	3.46241	-1.38264	0.00031931	0.00143139	0.260163
RNF157	-1.41853	1.07e-08	2.02e-07	10.2306	-2.77601	1.1e-06	1.4e-05	5.91071
DUS3L	-1.71418	1.7e-08	2.91e-07	9.85166	-1.16778	3.76e-06	3.71e-05	4.4636
EPHA2	-1.24309	6.04e-09	1.26e-07	10.5262	-2.25504	1.13e-06	1.43e-05	5.3462
PLK4	-1.90338	2.03e-05	0.000106187	2.9582	-2.84354	2.37e-09	1.65e-07	11.9574
KIF2C	-3.29598	9.86e-12	8.19e-10	17.2768	-2.47661	9.24e-11	2.2e-08	15.1767
UCK2	-1.17612	3.4e-10	1.27e-08	13.5915	-2.36752	1.15e-09	1.02e-07	12.6479
NUF2	-2.92114	9.42e-11	4.69e-09	15.0576	-2.79362	2.2e-10	3.68e-08	14.2873
PFDN2	-1.40035	7.64e-11	3.98e-09	15.0526	-1.73572	3.23e-10	4.54e-08	13.9228
ANP32E	-1.54918	1.56e-10	6.8e-09	14.4111	-1.13617	5.56e-08	1.47e-06	8.5255
DTL	-2.91922	5.45e-09	1.16e-07	11.0192	-4.48695	2.24e-07	4.04e-06	7.47438
TTC13	-1.32607	0.000160583	0.000622982	0.857066	-1.43218	1.54e-08	6.08e-07	10.0939
PYCR2	-1.32608	7.43e-11	3.89e-09	15.1166	-1.21921	9.04e-08	2.07e-06	8.24553
LBR	-1.04812	0.000175793	0.000673982	0.492245	-1.95726	3.09e-11	1.31e-08	16.2655
CHAC2	-1.87315	1.71e-11	1.27e-09	16.7112	-3.28162	1.63e-06	1.89e-05	5.52211
CDCA7	-2.82708	9.94e-11	4.89e-09	15.0057	-5.45215	1.16e-07	2.51e-06	8.11636
FANCD2	-2.20887	2.95e-08	4.56e-07	9.37964	-2.98785	4.72e-09	2.71e-07	11.2557
STAC	-1.93136	1.24e-09	3.53e-08	12.4777	-1.50849	7.63e-05	0.00043274	1.5411
COL8A1	-1.93904	6.32e-11	3.43e-09	15.4189	-1.34152	3.33e-07	5.55e-06	6.6851
LYAR	-1.48829	1.36e-10	6.12e-09	14.4564	-2.69283	1.01e-08	4.61e-07	10.4839
ENOPH1	-1.50444	1.19e-09	3.43e-08	12.2569	-1.58501	6.73e-09	3.51e-07	10.8091
AFG2A	-1.1865	1.81e-06	1.37e-05	4.99299	-1.60998	1.78e-08	6.72e-07	9.94581
CCNA2	-3.01356	4.5e-08	6.44e-07	8.82087	-2.82318	3.88e-12	5.15e-09	18.2693
NAF1	-1.62943	1.91e-10	8.04e-09	14.3015	-1.47364	7.33e-07	1.02e-05	6.20659
NKD2	-2.77569	1.22e-09	3.5e-08	12.4946	-5.0995	0.0002194	0.00104728	0.814907
MYO10	-1.1181	1.8e-07	2.02e-06	7.08292	-1.73644	2.25e-06	2.44e-05	4.64781
TNFAIP8	-1.86737	7.47e-09	1.5e-07	10.6712	-2.3314	5.7e-07	8.33e-06	6.49074
TRIM7	-2.19017	1.05e-08	1.99e-07	10.3811	-2.49198	2.57e-07	4.5e-06	7.31485
MMS22L	-1.18667	7.16e-05	0.000314354	1.55643	-2.72097	1.15e-08	5.04e-07	10.3974
MTFR2	-2.92003	8.24e-06	4.94e-05	3.89287	-3.2338	2e-06	2.23e-05	5.29646
CDCA5	-2.38161	9.38e-13	1.6e-10	19.637	-3.4988	8.51e-10	8.59e-08	12.9728
NCAPG2	-1.8752	2.47e-09	6.06e-08	11.782	-2.69937	3.3e-11	1.35e-08	16.1797
SH3KBP1	-2.90313	1.55e-14	9.41e-12	23.6788	-1.66448	4.61e-08	1.29e-06	8.79542
CCNB3	-1.89534	1.14e-06	9.21e-06	5.78527	-1.95911	3.45e-07	5.72e-06	6.99712
GINS4	-1.48884	2.19e-08	3.58e-07	9.48461	-3.59389	2.45e-08	8.31e-07	9.64606
FAM83A	-1.84435	1.89e-11	1.36e-09	16.5232	-1.94069	5.2e-08	1.41e-06	8.61229
SIGMAR1	-1.08794	4.24e-08	6.12e-07	8.4732	-2.11844	1.16e-10	2.57e-08	14.947
CEP78	-1.29814	1.7e-07	1.92e-06	7.36979	-2.99339	3.01e-10	4.37e-08	13.9661
PDSS1	-1.15402	1.14e-06	9.23e-06	5.48842	-3.18387	1.72e-07	3.36e-06	7.70309
MKI67	-2.44091	1.7e-09	4.57e-08	12.1368	-2.95218	1.03e-10	2.39e-08	15.0472
ITPRIP	-1.9222	8.86e-10	2.73e-08	12.8135	-2.68168	2.78e-05	0.00019001	2.74253
CHEK1	-1.15352	4.67e-08	6.62e-07	8.61135	-2.28322	5.04e-08	1.38e-06	8.8075
HIRIP3	-2.16505	3.42e-11	2.14e-09	16.0562	-1.97999	4.08e-07	6.53e-06	6.79516
HMGA2	-2.47018	6.5e-10	2.13e-08	13.1365	-2.9569	2.04e-12	3.71e-09	18.82
SLC7A11	-5.00943	5.25e-15	4.36e-12	23.91	-1.56755	0.00022461	0.00106866	0.144056
TEX30	-1.5248	1.99e-10	8.23e-09	14.1929	-3.11095	6.04e-08	1.56e-06	8.71536
SCLT1	-1.73129	9.07e-08	1.13e-06	8.15784	-1.80367	3.43e-08	1.04e-06	9.31171
EDNRA	-2.67475	1.23e-11	9.69e-10	17.0625	-2.3881	1.56e-07	3.13e-06	7.72862
ADAM8	-2.06197	6.17e-12	6.06e-10	17.7659	-2.61029	4.4e-08	1.25e-06	8.88887
CENPU	-3.05697	1.85e-13	5.52e-11	21.2334	-2.69587	6.97e-08	1.72e-06	8.49153
AMN1	-1.76971	1.58e-07	1.81e-06	7.64121	-1.06325	0.00028136	0.00128672	0.337746
SPC25	-2.88169	1.12e-08	2.08e-07	10.2943	-3.74359	1.19e-09	1.04e-07	12.1986
PDK1	-2.02639	1.72e-08	2.94e-07	9.90346	-3.30989	5.29e-11	1.7e-08	15.5323
CENPH	-2.5446	7.7e-12	6.81e-10	17.54	-1.90606	3.18e-07	5.34e-06	7.02839
ADGRF4	-2.67118	7.18e-12	6.59e-10	17.5927	-1.96522	2.8e-05	0.00019133	2.59099
ASAP1	-1.44846	2.08e-09	5.32e-08	11.8688	-1.4169	2.07e-06	2.29e-05	4.89263
PID1	-1.75128	7.55e-06	4.59e-05	3.89219	-2.12527	1.48e-08	5.91e-07	10.0543
CEBPG	-1.72802	1.9e-11	1.36e-09	16.5696	-1.34661	1.62e-05	0.00012137	2.98889
DGKE	-1.22594	0.000115879	0.000472124	0.994227	-1.3993	2.74e-06	2.86e-05	4.90625
C16orf74	-1.45212	3.38e-09	7.83e-08	11.3297	-1.80055	0.0002163	0.00103568	0.807836
NRGN	-2.38723	9.33e-05	0.000393955	1.60496	-3.95251	0.00028644	0.00130637	0.518481
PITPNC1	-1.36604	1.11e-06	9.02e-06	5.46984	-2.26252	4.55e-07	7.02e-06	6.73152
SKA1	-3.8799	2.14e-11	1.5e-09	16.1026	-3.69564	7.61e-09	3.81e-07	10.489
EME1	-1.77556	1.97e-06	1.48e-05	5.22245	-3.06073	1.49e-08	5.92e-07	10.1083
OTUD6B	-1.27708	1.49e-07	1.72e-06	7.56666	-1.24676	8.6e-08	2e-06	8.25256
NIFK	-1.04264	2.26e-07	2.41e-06	6.77981	-1.13865	3.61e-06	3.59e-05	4.25534
DCK	-1.5471	8.74e-05	0.000372344	0.825109	-1.44586	2.76e-08	8.9e-07	9.43274
SFR1	-1.04273	1.28e-06	1.02e-05	5.3723	-1.05714	8.6e-05	0.00047773	1.50797
TBC1D31	-1.55916	6.48e-07	5.78e-06	6.26326	-2.00938	2.21e-09	1.59e-07	12.0245
ATAD2	-2.16008	2.43e-06	1.77e-05	4.69427	-3.94677	9.42e-10	9.05e-08	12.8431
BUB1B	-2.11235	9.77e-06	5.69e-05	3.71588	-2.27395	1.18e-10	2.57e-08	14.9341
NRG1	-2.75971	6.56e-14	2.79e-11	22.2551	-3.15402	1.97e-07	3.69e-06	7.59783
LRP8	-1.61667	4.88e-06	3.19e-05	4.20192	-3.83243	4.6e-09	2.67e-07	11.2544
STEAP2	-2.32409	3.54e-10	1.32e-08	13.7456	-1.39258	2.19e-06	2.4e-05	4.93478
CCNB2	-3.04409	5.38e-13	1.14e-10	20.1637	-1.89	3.07e-08	9.65e-07	9.26106
FANCC	-1.14555	1.07e-06	8.71e-06	5.52021	-1.77712	1.53e-08	6.07e-07	10.0885
CDC25C	-3.4228	6.82e-08	9.06e-07	8.51107	-1.68735	7.99e-07	1.09e-05	6.10611
GART	-1.47723	1.18e-08	2.17e-07	9.88922	-1.33148	7.45e-09	3.76e-07	10.6336
CHAF1B	-1.59542	4.05e-08	5.93e-07	8.93643	-3.4203	3.11e-07	5.25e-06	7.13789
HK2	-1.21426	1.08e-05	6.21e-05	3.36052	-1.74387	5.3e-10	6.25e-08	13.3814
TNFRSF13C	-3.74252	9.77e-05	0.000408404	1.35809	-2.41728	0.00052989	0.00217914	0.0421025
PDE9A	-1.75476	2.15e-06	1.59e-05	5.00765	-3.12882	1.57e-06	1.84e-05	5.48503
COX6B2	-2.17034	1.42e-06	1.11e-05	5.60377	-1.89474	0.00010321	0.00055855	1.56507
RECQL4	-1.57667	3.5e-09	7.98e-08	11.3332	-2.47933	1.27e-08	5.39e-07	10.1599
BDH1	-1.27914	2.29e-05	0.000117844	2.58969	-1.06882	5.18e-05	0.00031528	1.8708
KASH5	-2.3286	1.64e-07	1.87e-06	7.69753	-1.60277	2.99e-05	0.00020127	2.60661
DBF4B	-2.39324	7.79e-05	0.000337113	1.75808	-1.95447	5.84e-09	3.17e-07	11.064
RACGAP1	-2.48302	4.5e-09	9.84e-08	11.091	-2.29485	2.1e-11	1.12e-08	16.6495
SPC24	-1.20117	0.000113147	0.000463579	1.16993	-3.30785	3.47e-09	2.21e-07	11.5354
MEIOB	-3.95741	2.15e-13	5.94e-11	20.7252	-2.27666	1.25e-07	2.66e-06	8.02547
LAPTM5	-4.42191	2.29e-10	9.14e-09	13.7177	-4.38903	2.3e-06	2.49e-05	5.07934
USP1	-1.23333	1.37e-06	1.08e-05	5.13874	-1.78787	7.58e-08	1.83e-06	8.32589
IER5	-1.2949	1.12e-09	3.25e-08	12.3235	-1.7087	2.54e-08	8.49e-07	9.40308
CCDC138	-1.00551	5e-05	0.000231194	1.75567	-2.0619	4.81e-07	7.32e-06	6.70311
VSNL1	-3.92679	0.000169264	0.000652002	0.834777	-3.36687	1.47e-06	1.74e-05	5.27863
TGFA	-1.38153	6.22e-09	1.29e-07	10.674	-2.55146	4.01e-09	2.41e-07	11.3274
CCNYL1	-1.45192	2.46e-08	3.92e-07	9.23795	-2.12942	1.64e-07	3.24e-06	7.58043
NIPAL1	-1.19909	4e-07	3.86e-06	6.53312	-2.29801	1.88e-07	3.55e-06	7.62782
ANTXR2	-1.55043	1.73e-08	2.94e-07	9.74658	-1.55005	8.04e-08	1.91e-06	8.19873
CLDN1	-1.19493	6.23e-07	5.59e-06	5.9259	-2.11319	4.49e-07	6.97e-06	6.62519
CIP2A	-2.34208	2.63e-06	1.9e-05	4.95681	-3.10113	6.97e-11	1.99e-08	15.3485
CHCHD4	-1.35064	1.93e-07	2.13e-06	7.07733	-1.28656	1.17e-05	9.32e-05	3.35811
SGO2	-1.53082	1.11e-05	6.35e-05	3.47029	-2.22911	1.29e-08	5.44e-07	10.2115
KIF15	-3.13751	1.19e-07	1.42e-06	8.01452	-2.65242	2.15e-10	3.66e-08	14.3148
RFC4	-1.10563	6.94e-09	1.42e-07	10.5423	-2.9851	1.08e-08	4.82e-07	10.4552
RFT1	-1.20675	1.93e-09	5.02e-08	11.8241	-1.28308	1.77e-07	3.42e-06	7.51389
CDC25A	-1.8052	1.46e-05	8e-05	3.19	-4.23845	5.7e-07	8.33e-06	6.55679
SPRY1	-1.1216	2.31e-05	0.000118681	2.15764	-2.49483	1.65e-08	6.35e-07	9.99884
MST1R	-1.87	3.33e-11	2.12e-09	16.0508	-1.57776	7.19e-08	1.76e-06	8.3019
DUSP7	-1.31389	2.12e-09	5.41e-08	11.7816	-1.62624	2.63e-07	4.58e-06	7.1802
POC1A	-2.54989	3.91e-10	1.42e-08	13.6402	-2.15825	6.01e-08	1.56e-06	8.73695
HMGB2	-2.76684	1.15e-15	2.1e-12	26.279	-2.07854	7.65e-11	2e-08	15.349
SAP30	-1.32184	4.9e-10	1.7e-08	13.2455	-1.72048	1.82e-07	3.48e-06	7.66505
MAD2L1	-2.53333	1.91e-13	5.52e-11	21.2297	-3.35556	4.52e-11	1.53e-08	15.8592
ITGA2	-2.09327	7.94e-11	4.1e-09	15.1237	-1.88902	4.59e-10	5.61e-08	13.5544
NDUFAF2	-1.02731	4.62e-08	6.57e-07	8.48244	-1.19735	0.00021418	0.00102807	0.421224
RAET1E	-4.39072	3.36e-08	5.09e-07	8.61285	-2.33367	2.59e-05	0.00017906	2.84239
STK17A	-1.72126	4.06e-07	3.91e-06	6.1787	-1.78994	9.87e-07	1.28e-05	5.66334
GALNT10	-1.06464	6.03e-09	1.26e-07	10.6192	-2.91633	1.71e-08	6.49e-07	9.84645
PTTG1	-2.41223	5.26e-08	7.32e-07	8.52247	-2.03947	1.06e-09	9.72e-08	12.7179
STEAP1	-1.45586	5.44e-10	1.86e-08	13.2036	-2.23321	1.69e-07	3.32e-06	7.6777
CDCA7L	-1.18055	2.32e-07	2.47e-06	6.99782	-1.69665	3.58e-06	3.56e-05	4.37179
ADCY1	-1.51223	3.2e-08	4.87e-07	9.19481	-2.60712	1.08e-06	1.37e-05	5.89931
LETM2	-2.68125	3.98e-10	1.44e-08	13.6023	-2.6181	2.46e-05	0.00017167	2.89837
ZNF367	-1.92577	1.55e-05	8.43e-05	3.24076	-3.01677	1.53e-05	0.00011609	3.15119
MELK	-3.17511	1.83e-13	5.52e-11	21.1259	-3.30713	5.31e-11	1.7e-08	15.648
GJB2	-1.86537	3.4e-06	2.35e-05	4.67987	-4.13996	7.01e-05	0.00040447	1.91417
SKA3	-3.31509	1.22e-12	1.92e-10	19.1311	-3.50049	3.93e-09	2.39e-07	11.4326
LRR1	-1.46785	6.64e-09	1.37e-07	10.6388	-2.65423	2.07e-06	2.29e-05	5.22986
HPRT1	-1.36905	4.03e-10	1.46e-08	13.3513	-2.41381	7.13e-12	7.26e-09	17.6609
DDX21	-1.35346	3.84e-10	1.41e-08	13.4038	-1.55983	1.84e-09	1.39e-07	12.0802
E2F7	-3.29252	1.28e-05	7.19e-05	3.48583	-4.65897	3.14e-08	9.76e-07	9.29415
IDH3A	-1.23498	1.91e-09	4.99e-08	11.8759	-1.16805	9.57e-07	1.25e-05	5.70771
CENPN	-1.73632	6.31e-09	1.31e-07	10.7889	-2.6499	3.56e-10	4.81e-08	13.8272
MCM7	-1.05406	2.3e-08	3.71e-07	9.12376	-2.447	6.18e-09	3.28e-07	10.8188
PLK1	-3.21643	6.62e-12	6.23e-10	17.589	-2.52611	3.41e-10	4.65e-08	13.8674
NEMP1	-1.23499	2.32e-05	0.000118858	2.65615	-2.48682	5.12e-10	6.13e-08	13.4762
RCCD1	-1.0422	4.23e-07	4.03e-06	6.32915	-1.54914	1.16e-08	5.04e-07	10.3317
CDT1	-2.08601	4.36e-10	1.54e-08	13.5025	-2.6691	1.15e-08	5.04e-07	10.3415
RHEBL1	-1.95908	3.93e-06	2.66e-05	4.4736	-3.20619	3.02e-05	0.00020272	2.5232
CHAF1A	-1.26061	9.34e-07	7.86e-06	5.7628	-3.314	9.34e-08	2.13e-06	8.30803
ANGPTL4	-1.77065	3.61e-05	0.000173958	2.45375	-6.30631	5.13e-05	0.00031274	1.77726
NUDT8	-1.233	5.59e-06	3.56e-05	3.77983	-1.5801	9.79e-05	0.00053359	1.32537
TMC8	-2.04442	2.56e-08	4.04e-07	9.52244	-1.10089	0.00021513	0.00103199	0.189478
TK1	-2.18709	7.24e-12	6.61e-10	17.5622	-3.03862	3.88e-09	2.37e-07	11.3788
PBK	-3.25759	9.68e-11	4.78e-09	15.0285	-3.05844	2.06e-10	3.62e-08	14.3516
ACOX2	-5.8515	6.39e-08	8.6e-07	8.01053	-6.91513	2.47e-07	4.37e-06	5.66823
DTYMK	-1.04899	1.89e-09	4.96e-08	11.7424	-2.24792	2.13e-09	1.54e-07	12.0189
MLKL	-1.47688	8.72e-07	7.43e-06	5.84231	-1.032	0.00014749	0.0007507	0.713891
SLC35G2	-1.9196	2.23e-05	0.000115067	2.91052	-3.47363	8.61e-05	0.00047795	1.67691
MAP2K1	-1.51184	3.18e-09	7.48e-08	11.2703	-1.44253	4.83e-09	2.75e-07	11.131
CKAP2L	-3.70345	4.54e-12	5.03e-10	17.8525	-2.3811	1.09e-09	9.88e-08	12.7217
BUB1	-2.98161	1.23e-10	5.66e-09	14.7541	-2.29412	1.96e-10	3.55e-08	14.4159
ADRA1B	-2.19583	2.45e-09	6.04e-08	11.8083	-3.27527	1.61e-09	1.29e-07	12.341
CDK1	-2.87395	1.04e-13	3.97e-11	21.716	-3.15822	2.1e-10	3.62e-08	14.3597
ADORA2B	-1.91676	6.72e-13	1.29e-10	19.9587	-2.59908	9.05e-10	8.87e-08	12.9023
PA2G4	-1.25108	3.61e-11	2.21e-09	15.8257	-1.57902	1.04e-09	9.69e-08	12.6716
ELOVL6	-1.21811	1.09e-06	8.85e-06	5.41424	-1.23527	8.47e-08	1.98e-06	8.17974
CDCA4	-1.11846	6.53e-10	2.13e-08	12.8945	-2.76919	2.3e-10	3.73e-08	14.2637
NETO2	-1.41908	1.64e-09	4.44e-08	11.9726	-2.89106	7.87e-12	7.35e-09	17.6109
SHCBP1	-2.74506	5.83e-11	3.18e-09	15.4534	-3.27668	1.34e-08	5.56e-07	10.2373
ESCO2	-3.42764	4.73e-07	4.43e-06	6.63527	-3.93925	5.72e-09	3.13e-07	10.9969
RHNO1	-1.24834	2.5e-09	6.09e-08	11.5712	-1.25539	1.34e-07	2.8e-06	7.83856
CTPS1	-1.6732	1.26e-09	3.57e-08	12.3101	-4.15553	7.75e-11	2e-08	15.2374
RRM2	-3.18276	4.82e-14	2.2e-11	22.5495	-4.71754	4.13e-10	5.3e-08	13.6872
PRNP	-1.25982	3.9e-07	3.79e-06	6.24445	-1.33639	6.48e-08	1.64e-06	8.37056
MIR31HG	-3.22976	1.02e-05	5.89e-05	3.59429	-4.46735	5.66e-06	5.15e-05	3.66639
MOB3A	-1.99376	1.33e-09	3.74e-08	12.3855	-1.49353	7.14e-09	3.65e-07	10.7667
CYCS	-1.34771	1.43e-10	6.33e-09	14.3928	-2.06847	8.19e-10	8.42e-08	12.9604
MTBP	-1.14418	3.18e-05	0.000156002	2.33096	-2.21944	1.88e-07	3.55e-06	7.58277
MALT1	-2.31075	2.19e-11	1.53e-09	16.5057	-1.11154	0.00011401	0.0006076	0.918151
C5orf34	-2.40622	7.78e-07	6.74e-06	6.1842	-3.59508	6.52e-08	1.64e-06	8.39491
MYEOV	-2.88272	6.78e-13	1.29e-10	19.9601	-6.68865	6.13e-11	1.88e-08	14.6746
GRK2	-1.33955	1.82e-08	3.07e-07	9.52321	-1.31853	1.46e-09	1.22e-07	12.3026
CKS1B	-2.20557	4.03e-10	1.46e-08	13.4601	-2.7798	3.13e-10	4.5e-08	13.9663
EHBP1L1	-1.2665	2.08e-09	5.32e-08	11.7516	-1.02996	7.59e-06	6.52e-05	3.39131
PPP1R14B	-1.00325	7.22e-09	1.46e-07	10.311	-1.26026	5.42e-09	3.01e-07	10.9283
CEP83	-1.17894	1.17e-05	6.65e-05	3.29423	-1.21947	4.81e-06	4.52e-05	4.34157
PLK3	-1.00332	1.9e-05	0.000100405	2.62011	-1.30242	2.45e-05	0.00017145	2.67453
EXO1	-2.2245	3.83e-07	3.74e-06	6.8276	-4.41267	3.75e-08	1.11e-06	9.20639
FAM241A	-3.08772	4.83e-12	5.25e-10	18.008	-2.19266	6.3e-08	1.61e-06	8.71931
RIN1	-1.36435	3.62e-06	2.48e-05	4.45868	-1.38641	9.76e-07	1.27e-05	5.77415
ZDHHC14	-1.57195	2.09e-05	0.000108672	2.91867	-3.64699	4.82e-08	1.34e-06	8.74896
UBE2C	-2.57558	5e-12	5.32e-10	17.9551	-3.23022	9.12e-12	7.64e-09	17.4638
CKAP5	-1.45622	3.69e-09	8.36e-08	11.2245	-1.38126	7.09e-08	1.74e-06	8.314
CCNE2	-2.14693	1.26e-05	7.06e-05	3.34954	-4.47918	9.24e-07	1.22e-05	6.0793
MCTP1	-5.91433	7.73e-07	6.71e-06	5.41765	-1.75907	3.94e-06	3.84e-05	4.5664
LONRF3	-1.9614	2.65e-11	1.8e-09	16.2972	-2.11809	5.95e-09	3.21e-07	11.0433
FOSL1	-4.256	1.14e-15	2.1e-12	25.9535	-7.73872	9.61e-08	2.16e-06	8.02946
RMI2	-1.54756	2.09e-06	1.55e-05	4.86323	-2.48925	1.1e-07	2.41e-06	8.13363
MTLN	-1.43282	4.24e-11	2.47e-09	15.7055	-1.0488	5.19e-05	0.00031566	1.82932
RUVBL1	-1.55632	7.14e-11	3.77e-09	15.1336	-1.46953	5.37e-09	3e-07	11.0151
ETV4	-4.50638	1.23e-11	9.69e-10	16.6716	-7.98431	2.37e-10	3.82e-08	10.4712
ARL4D	-2.23543	2.25e-12	2.95e-10	18.7655	-1.96705	2.46e-08	8.32e-07	9.6245
SPHK1	-2.22199	2.51e-07	2.62e-06	7.28346	-3.6396	2.64e-06	2.78e-05	5.05265
ATAD5	-1.28504	0.000231983	0.000853408	0.437958	-3.33158	7.43e-08	1.8e-06	8.55723
TYMS	-1.80241	4.24e-11	2.47e-09	15.791	-3.95645	2.06e-10	3.62e-08	14.3311
TCIM	-1.2099	2.17e-07	2.34e-06	6.787	-1.52959	1.2e-05	9.5e-05	3.33804
TYMSOS	-2.19337	3.37e-09	7.81e-08	11.515	-2.11606	1.12e-05	8.97e-05	3.66938
POLE	-1.57157	3.06e-06	2.15e-05	4.62022	-2.24376	1.42e-07	2.92e-06	7.71382
IRX3	-1.28107	1.34e-06	1.06e-05	4.99797	-2.02534	4.54e-08	1.28e-06	8.92215
SHISA3	-3.46518	7.04e-08	9.28e-07	8.29391	-3.94323	4.67e-08	1.31e-06	8.84344
RPP25	-1.72698	1.48e-10	6.5e-09	14.5134	-1.79437	7.78e-06	6.66e-05	3.62602
AURKB	-3.09004	1.35e-10	6.12e-09	14.691	-3.66366	8.77e-12	7.64e-09	17.2971
ARID3B	-2.19012	3.23e-07	3.23e-06	6.97084	-1.43445	1.88e-06	2.13e-05	5.3041
B3GNT3	-1.79654	2.6e-08	4.1e-07	9.45456	-1.07806	5.04e-05	0.00030807	1.54061
ANKRD18A	-1.0948	0.000277314	0.000992386	0.114968	-1.12375	0.00022521	0.00107106	0.499931
AEN	-1.68927	5.59e-10	1.88e-08	13.2464	-3.27628	2.9e-07	4.96e-06	7.17495
LINC03040	-2.10885	3.52e-09	8.02e-08	11.4589	-2.39608	6.78e-08	1.69e-06	8.59702
PHLDA2	-1.28602	3.91e-11	2.34e-09	15.7574	-4.35608	4.5e-09	2.64e-07	11.3208
GINS3	-1.25631	6.92e-07	6.11e-06	6.08583	-3.08251	1.15e-07	2.48e-06	8.12997
RTKN2	-1.07761	2.38e-07	2.52e-06	7.03782	-1.05775	0.00017769	0.00088008	0.512028
FAM89A	-1.2083	8.15e-08	1.04e-06	7.99241	-1.36741	6.11e-06	5.48e-05	4.18547
SHMT2	-1.73835	2.58e-12	3.26e-10	18.575	-1.06626	1.48e-09	1.23e-07	12.3054
PSMG1	-1.05451	3.19e-09	7.48e-08	11.2495	-1.20566	4.83e-07	7.34e-06	6.54297
RFLNB	-1.89566	1.06e-06	8.71e-06	5.84729	-3.33979	0.0003743	0.00163305	0.360779
UPP1	-3.90763	1.62e-17	2.96e-13	30.0303	-2.64602	4.62e-07	7.09e-06	6.65415
LIN9	-1.07667	5.26e-05	0.000241916	1.73553	-2.1497	1.02e-07	2.25e-06	8.24381
IQGAP3	-3.61372	0.000159836	0.000620886	1.08343	-2.53689	2.11e-10	3.62e-08	14.3438
KMT5A	-1.03044	3.73e-05	0.000178982	1.88136	-1.26514	4.44e-08	1.25e-06	8.9286
CMSS1	-1.90098	8.46e-12	7.39e-10	17.3884	-2.20267	4.55e-09	2.65e-07	11.3131
KNTC1	-1.65345	3.37e-06	2.33e-05	4.68332	-2.82903	8.56e-10	8.61e-08	12.9651
OR56A3	-1.21286	1.98e-05	0.000103749	2.70813	-2.92235	5.01e-06	4.66e-05	4.45
CDCA2	-2.49993	7.66e-09	1.53e-07	10.6989	-2.64982	2.39e-10	3.82e-08	14.229
BRI3BP	-1.21337	7.57e-08	9.81e-07	8.07534	-2.83451	1.76e-09	1.36e-07	12.2227
MAFF	-2.42924	6.25e-10	2.06e-08	13.1832	-3.14899	2.9e-07	4.96e-06	7.11709
UBALD2	-2.37272	6.22e-13	1.25e-10	20.0207	-1.88317	1.11e-08	4.89e-07	10.2907
KCNQ5	-1.88817	2.49e-10	9.79e-09	14.0648	-1.74142	1.55e-06	1.82e-05	5.31976
KIF18B	-2.63053	5.48e-10	1.87e-08	13.2641	-3.14178	7.43e-11	2e-08	15.3268
SAPCD2	-2.13931	1.63e-10	7.07e-09	14.3859	-2.47604	7.21e-10	7.79e-08	13.0725
MTARC1	-1.65909	1.67e-05	9e-05	3.16911	-2.77061	5.2e-05	0.00031566	2.15087
KIF24	-1.77929	0.000141077	0.000557744	1.14726	-2.36798	1.68e-07	3.3e-06	7.75536
SPRY4	-3.00548	3.2e-08	4.87e-07	9.28622	-8.40437	4.65e-07	7.12e-06	5.10324
FANCA	-2.16743	4.82e-11	2.7e-09	15.7241	-3.37741	7.32e-11	2e-08	15.3779
EIF4EBP1	-1.94498	8.9e-13	1.53e-10	19.6483	-2.09653	2.74e-10	4.18e-08	14.0852
S100A3	-1.76349	7.26e-08	9.51e-07	8.45948	-2.70379	0.00013593	0.00070198	1.30064
CENPP	-1.4754	8.59e-07	7.33e-06	5.8244	-2.9509	8.17e-09	3.99e-07	10.5276
H2AX	-1.68203	2.41e-10	9.55e-09	13.9143	-3.2167	2.07e-12	3.71e-09	18.9242
FAM72B	-3.97949	4.36e-05	0.000204568	1.87238	-2.25956	1.49e-07	3.02e-06	7.84098
GJB3	-1.61731	1.37e-08	2.46e-07	10.0695	-1.78596	1.06e-06	1.35e-05	5.83992
LIN54	-1.07876	8.05e-07	6.93e-06	5.7721	-1.02908	1.56e-05	0.00011802	2.94687
SYCP2	-1.04005	4.25e-06	2.83e-05	4.14876	-1.12313	2.23e-06	2.43e-05	4.84802
IL1RAP	-1.25219	3.01e-08	4.63e-07	9.18168	-2.74774	1.82e-06	2.07e-05	5.26985
CTSE	-3.845	0.000179177	0.000684229	0.753263	-3.80075	0.0002502	0.00116943	0.0159505
IARS1	-1.28184	4.29e-11	2.48e-09	15.6517	-1.29164	1.77e-08	6.68e-07	9.69044
YRDC	-1.47226	1.72e-11	1.27e-09	16.6671	-1.7715	3.94e-08	1.15e-06	9.11617
SPTSSB	-1.46415	2.09e-06	1.55e-05	4.8653	-1.70901	2.35e-07	4.2e-06	7.30302
XRCC2	-2.61391	1.49e-08	2.62e-07	10.0554	-4.28644	7.14e-08	1.75e-06	8.57745
S100A2	-1.23668	1.01e-09	3.01e-08	12.3514	-1.32575	1.12e-05	8.94e-05	2.94051
SNHG17	-1.11255	2.6e-09	6.3e-08	11.4167	-1.54705	8.65e-06	7.27e-05	3.46501
ZNF239	-1.24975	1.12e-07	1.35e-06	7.76873	-1.67152	7.09e-07	9.89e-06	6.31591
LRRC8B	-1.04845	1.51e-05	8.24e-05	2.94234	-1.21057	0.00014507	0.0007405	0.625226
BLM	-1.90533	1.05e-07	1.28e-06	8.08389	-3.41393	1.37e-08	5.69e-07	10.22
RPF2	-1.25266	3.13e-06	2.2e-05	4.24899	-1.28768	5.49e-07	8.12e-06	6.34778
TEAD4	-1.46792	1.82e-07	2.03e-06	7.4253	-2.3113	6.89e-07	9.67e-06	6.37413
ERO1A	-1.08983	1.93e-05	0.000101829	2.13128	-1.13666	9.18e-09	4.35e-07	10.3543
ZNF273	-1.62828	1.14e-06	9.21e-06	5.67751	-1.47337	5.65e-05	0.00033809	1.93929
MAK16	-1.38079	1.78e-08	3.01e-07	9.59916	-1.59816	3.48e-09	2.21e-07	11.5265
LPAR1	-2.43579	6.83e-09	1.4e-07	10.811	-2.11876	3.55e-05	0.00023155	2.25858
TFDP1	-1.1793	3.57e-09	8.11e-08	11.1168	-1.7054	1.14e-07	2.47e-06	7.83106
RPS6KL1	-1.35943	4.49e-06	2.97e-05	4.31597	-1.66836	0.00014885	0.00075648	1.08939
HYLS1	-1.07617	2.25e-05	0.000115929	2.50672	-1.99115	5.12e-08	1.39e-06	8.91708
NRARP	-1.4223	3.96e-07	3.83e-06	6.6452	-2.90496	8.25e-08	1.94e-06	8.35333
TMA16	-1.13819	9.89e-10	2.96e-08	12.4471	-1.11344	1.63e-07	3.22e-06	7.5883
STK39	-2.32658	3.83e-11	2.32e-09	15.9493	-1.10341	0.00011205	0.00059975	0.629798
FAM169A	-2.6385	0.000463355	0.00154016	0.124553	-1.45842	0.00018781	0.00092273	0.850462
ARHGAP11A	-2.87116	1.47e-13	5.06e-11	21.4474	-2.69875	1.56e-11	1.01e-08	16.8996
TOP1	-1.52109	7.62e-10	2.42e-08	12.6623	-1.40751	1.04e-09	9.69e-08	12.6435
PRC1	-3.24834	1.04e-07	1.28e-06	8.14264	-2.61002	1.88e-08	6.95e-07	9.70956
LINC01285	-1.03467	2.76e-05	0.000138248	2.19522	-1.17993	0.00018817	0.00092354	0.890941
CENPW	-1.63573	4.19e-09	9.3e-08	11.2124	-2.85555	4.51e-09	2.64e-07	11.0369
TAP2	-1.4103	1.86e-10	7.89e-09	14.1911	-1.80642	3.22e-06	3.26e-05	4.53728
LINC01291	-3.93489	6.11e-06	3.84e-05	3.70616	-3.26902	2.85e-08	9.11e-07	8.95454
[truncated: 115 more rows]

## Sheet: HPAFII RNAseq Candidates
gene_name	MvsC_H.logFC	MvsC_H.P.Value	MvsC_H.adj.P.Val	MvsC_H.B	KvsC_H.logFC	KvsC_H.P.Value	KvsC_H.adj.P.Val	KvsC_H.B
[truncated: 439 more rows]

[truncated: 7 more sheets: Query File, Query File H358, Query File HPAFII, Common candidates, Connectivity Analysis, ConnectivityMap vs H358_TFs, ConnectivityMap vs HPAFII_TFs]
